# Supplementary material for: Practical synthetic strategies towards lipophilic 6-iodotetrahydroquinolines and -dihydroquinolines
Source: publisher site journal article supplement (doi:10.3762/bjoc.12.174), 2016-08-16
Supplement: Additional file 1 [file 1860-5397-12-174-S1.pdf]

# Supporting Information

for

## Practical synthetic strategies towards lipophilic 6-iodotetrahydroquinolines and - dihydroquinolines

David R. Chisholm<sup>1</sup>, Garr-Lay Zhou<sup>1</sup>, Ehmke Pohl<sup>1,2</sup>, Roy Valentine<sup>3</sup> and  
Andrew Whiting<sup>1\*§</sup>

Address: <sup>1</sup>Centre for Sustainable Chemical Processes, Department of  
Chemistry, Durham University, South Road, Durham, DH1 3LE, UK,

<sup>2</sup>Biophysical Sciences Institute, Durham University, South Road, Durham,

DH1 3LE, UK and <sup>3</sup>High Force Research Limited, Bowburn North Industrial  
Estate, Bowburn, Durham, DH6 5PF, UK

Email: Andrew Whiting - [andy.whiting@durham.ac.uk](mailto:andy.whiting@durham.ac.uk)

<sup>§</sup>Fax: +44 (0)191 384 4737; Tel: +44 (0)191 334 2081

\*Corresponding author

### Full synthetic procedures, in situ FTIR data plots, and copies of <sup>1</sup>H, <sup>13</sup>C and <sup>11</sup>B NMR spectra

#### 1. ReactIR studies

To a rapidly stirred solution of compound **20a** (approximately 0.2 mmol) in an anhydrous solvent (10 mL) under Ar, was added dropwise DIBAL (1.0 M in cyclohexane, 1.0 equivalent) and the resultant solution stirred at rt until no further change was detected by ReactIR. The reactions were monitored by ReactIR in situ IR spectroscopy (Mettler Toledo) using the following procedure: 1) recorded a blank spectrum of the argon atmosphere, 2)

recorded a blank spectrum of the reaction solvent, 3) added the solution of compound **20a**, 4) identified the amide carbonyl stretch ( $1678\text{--}1685\text{ cm}^{-1}$ ), 5) followed the amide carbonyl stretch whilst 1 equivalent of DIBAL was added using the 'Trend' function in the iC IR<sup>TM</sup> (Mettler Toledo) software.

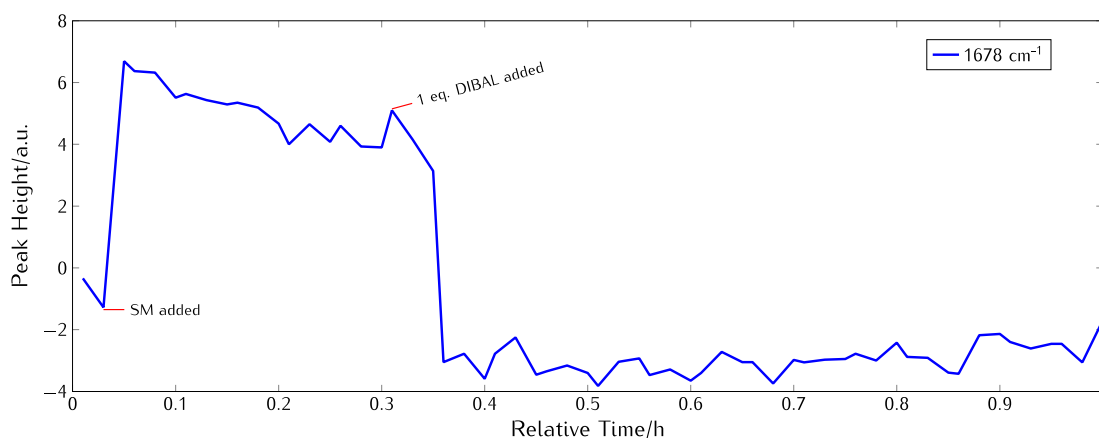

**Figure S1:** One equivalent of DIBAL added to a solution of **20a** in anhydrous DCM at rt.

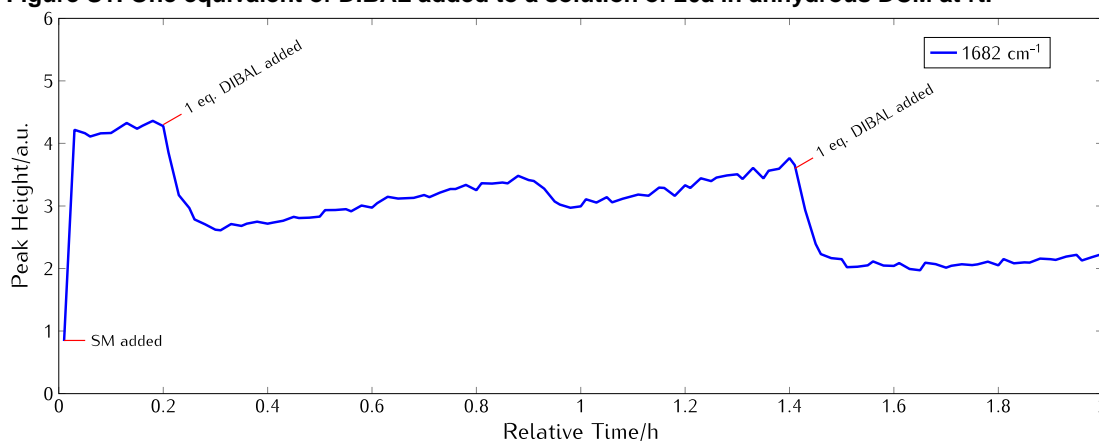

**Figure S2:** One equivalent of DIBAL added to a solution of **20a** in anhydrous THF at rt. A further equivalent of DIBAL was added after 1.4 hours after the progress of the reaction appeared to be slow.

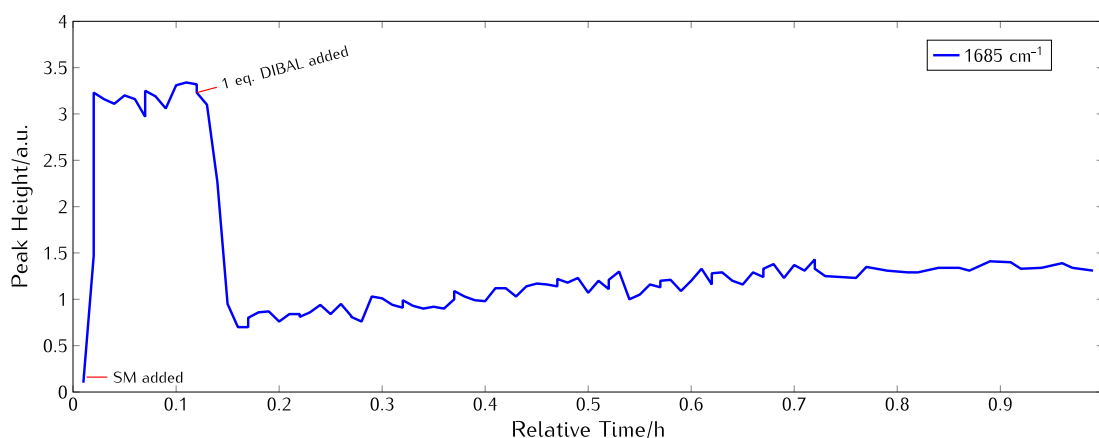

**Figure S3:** One equivalent of DIBAL added to a solution of **20a** in anhydrous toluene at rt.

## 2. DIBAL reductions of quinolin-2-ones, **23a–e**

Reductions of quinolin-2-ones, **23a–e** were conducted according to the optimised protocol developed for the reduction of **20a** to give DHQ **22**. The reactions were halted when TLC analysis indicated completion. In cases where the DHQ was formed in addition to the corresponding THQ (**23b** and **23d**), isolating the individual species by SiO<sub>2</sub> or neutral Al<sub>2</sub>O<sub>3</sub> chromatography was found to be very difficult. Accordingly, the crude <sup>1</sup>H NMR spectra of reactions were analysed in order to ascertain the approximate ratios of each product formed. Approximate yields of each species were calculated by comparing the relative integrals of corresponding signals in the NMR spectra.

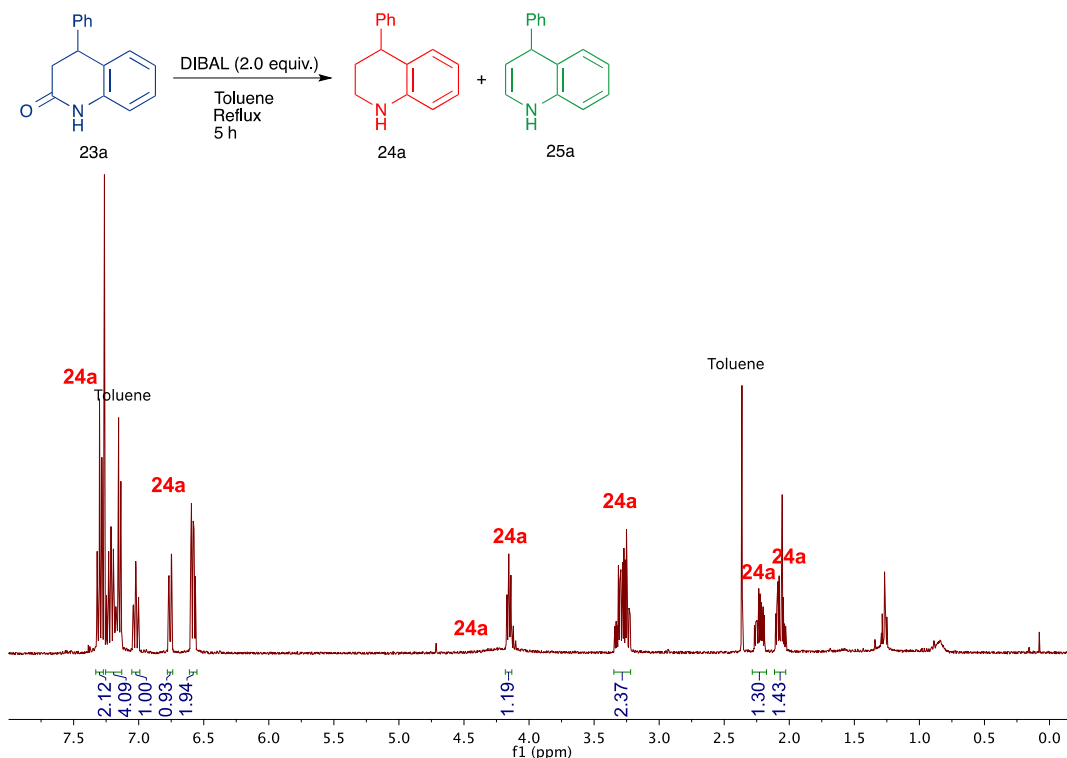

Figure S4: <sup>1</sup>H NMR spectrum of the crude mixture of the reaction between DIBAL and **23a**. Only the THQ **24a** was present, along with residual toluene and EtOAc [1].

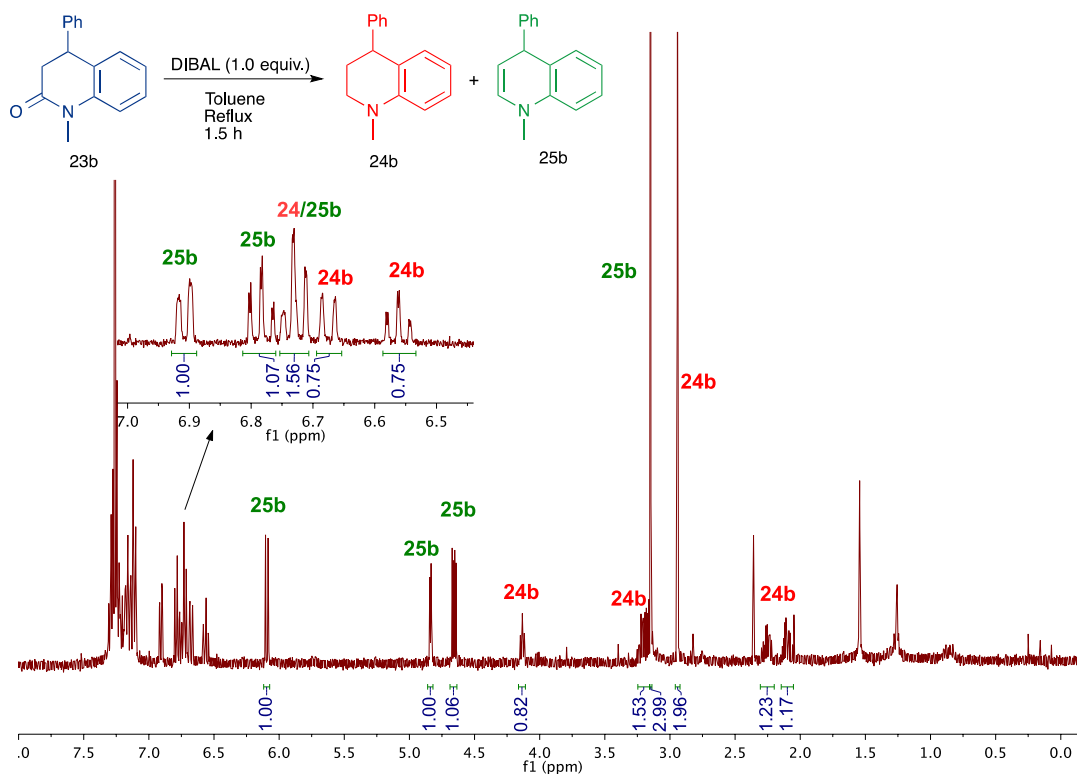

Figure S5: <sup>1</sup>H NMR spectrum of the crude mixture of the reaction between DIBAL and 23b. Approximate yields of THQ 24b and DHQ 25b were calculated by comparing the integrals of the corresponding *N*-Me signals (2.94 and 3.14 ppm, respectively) [2].

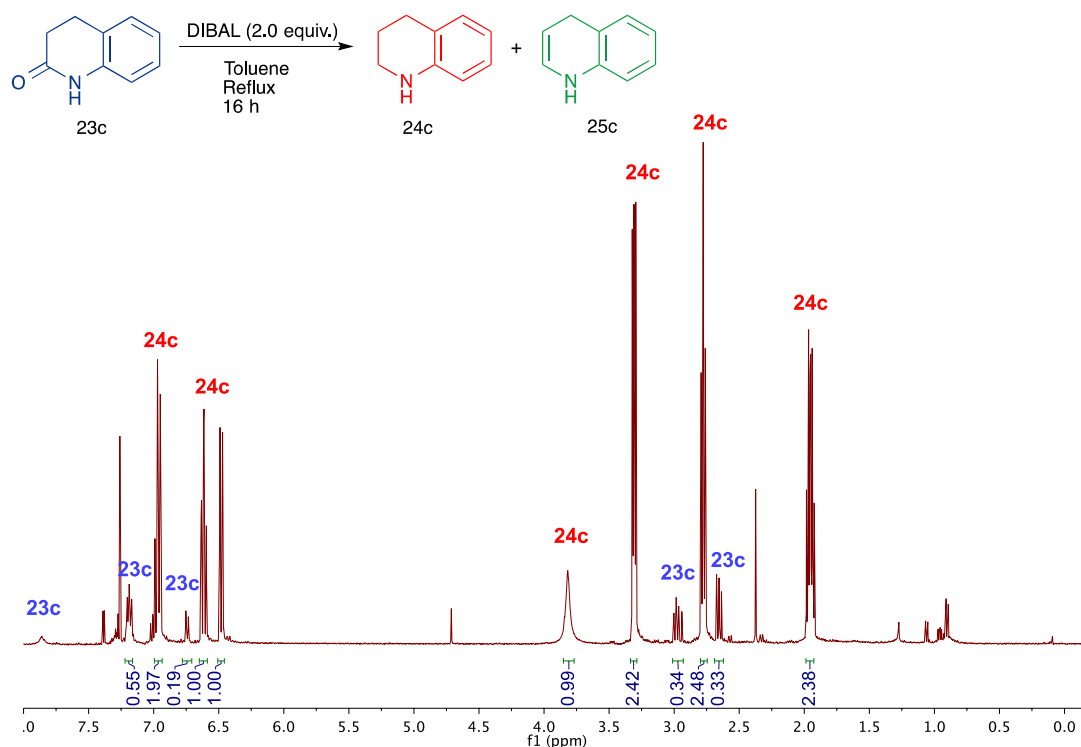

Figure S6: <sup>1</sup>H NMR spectrum of the crude mixture of the reaction between DIBAL and 23c. The approximate yield of THQ 24c compared to remaining 23c was calculated by comparing the integrals of the corresponding benzylic signals (2.77 and 2.97 ppm, respectively) [3].

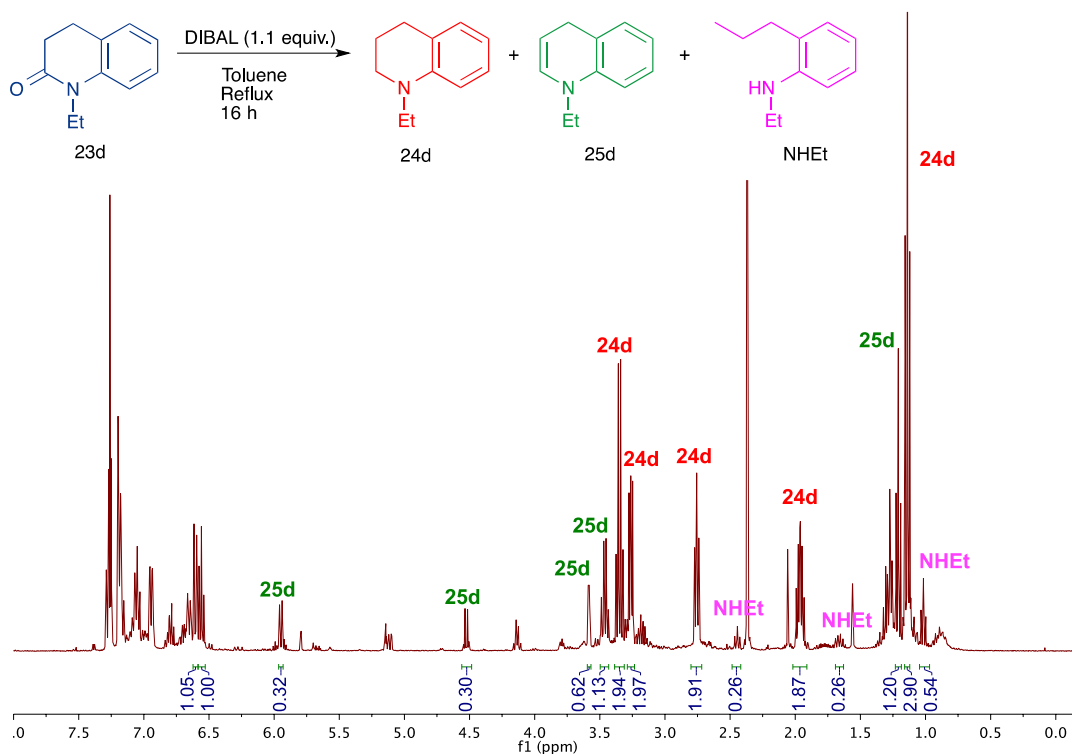

Figure S7: <sup>1</sup>H NMR spectrum of the crude mixture of the reaction between DIBAL and 23d. Approximate yields of THQ 24d, DHQ 25d and ring-opened aniline NHEt were calculated by comparing the integrals of the corresponding benzylic signals (2.76, 3.58 and 2.44 ppm, respectively). Other unidentified byproducts were also included in the calculation.

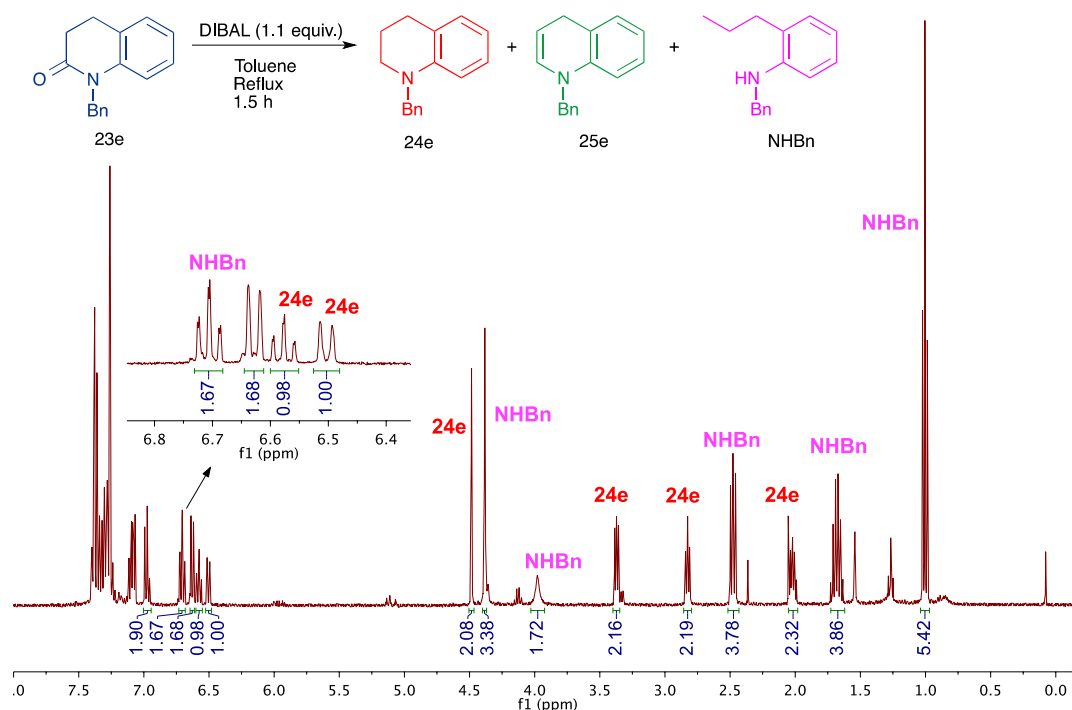

Figure S8: <sup>1</sup>H NMR spectrum of the crude mixture of the reaction between DIBAL and 23e. Approximate yields of THQ 24e and ring-opened aniline NHBn were calculated by comparing the integrals of the corresponding benzylic signals (2.82 and 2.46 ppm respectively). Trace amounts of 25e were also compared [4].

### 3. Synthetic procedures

#### 2-Methyl-*N*-(propan-2-yl)aniline (**6**)

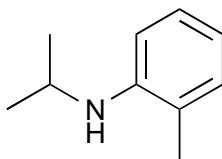

2-Iodopropane (40 mL, 400 mmol) was added to a refluxing mixture (105 °C) of *o*-toluidine (**5**, 21.4 mL, 200 mmol) and powdered NaOH (20 g, 500 mmol). The resultant solution was stirred at reflux for 12 h under Ar. The mixture was filtered, diluted with Et<sub>2</sub>O, washed with H<sub>2</sub>O, dried (MgSO<sub>4</sub>) and evaporated. The residue purified by basic Al<sub>2</sub>O<sub>3</sub> chromatography (hexane:EtOAc 95:5 as eluent), to afford compound **6** as a yellow oil (24.6 g, 82%): <sup>1</sup>H NMR (600 MHz; CDCl<sub>3</sub>) δ 1.28 (d, *J* = 6.3 Hz, 6H), 2.15 (s, 3H), 3.33 (br, 1H), 3.71 (sept, *J* = 6.3 Hz, 1H), 6.64-6.67 (m, 2H), 7.08 (d, *J* = 7.5 Hz, 1H), 7.18 (t, *J* = 8.1 Hz, 1H); <sup>13</sup>C NMR (176 MHz; CDCl<sub>3</sub>) δ 17.8, 23.4, 44.2, 110.4, 116.6, 121.9, 127.3, 130.4, 145.6; IR (neat)  $\nu_{\max}/\text{cm}^{-1}$  3432br, 3040w, 2960m, 2862w, 1605s, 1508s, 1476m, 1382m, 741s; MS (ES): *m/z* = 150.1 [M+H]<sup>+</sup>; HRMS (ES) calcd. for C<sub>10</sub>H<sub>16</sub>N [M+H]<sup>+</sup>: 150.1283, found: 150.1277.

#### 2-Methyl-*N*-(3-methylbut-2-en-1-yl)-*N*-(propan-2-yl)aniline (**4**)

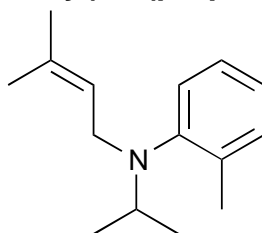

3,3-Dimethylallyl bromide (9.7 mL, 84 mmol) and compound **6** (11.3 g, 76 mmol) were dissolved in MeCN (200 mL). K<sub>2</sub>CO<sub>3</sub> (11.6 g, 84 mmol) was added and the flask stirred at reflux overnight under Ar. The mixture was filtered and the solvent removed in vacuo to give a dark residue that was purified by basic Al<sub>2</sub>O<sub>3</sub> chromatography, to give **4** as a yellow oil (11.5 g, 70%): <sup>1</sup>H NMR (700 MHz; CDCl<sub>3</sub>) δ 1.10 (s, 6H), 1.60 (d, *J* = 7.0 Hz, 6H) 2.31 (s, 3H), 3.22 (sept, *J* = 7.0 Hz, 1H), 3.60 (d, *J* = 6.3 Hz, 2H), 5.02 (t, *J* = 6.3 Hz, 1H), 6.96 (t, *J* = 7.7 Hz, 1H), 7.04 (d, *J* = 7.7 Hz, 1H), 7.11 (t, *J* = 7.7 Hz, 1H), 7.19 (d, *J* = 7.7 Hz, 1H); <sup>13</sup>C NMR (176 MHz; CDCl<sub>3</sub>) δ 18.5, 18.5, 19.7, 25.8, 44.2, 53.0, 123.0, 123.1, 123.7, 125.6, 130.9, 132.6, 135.7, 150.1; IR (neat)  $\nu_{\max}/\text{cm}^{-1}$  2968s, 2929m, 1598m, 1490s, 1449m, 1380m, 1360m; MS (ES): *m/z* = 218 [M+H]<sup>+</sup>; HRMS (ES) calcd for C<sub>15</sub>H<sub>24</sub>N [M+H]<sup>+</sup>: 218.1903, found: 218.1906.

### 4,4,8-Trimethyl-1-(propan-2-yl)-1,2,3,4-tetrahydroquinoline (3)

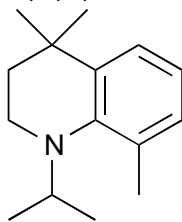

A mixture of polyphosphoric acid (PPA) (60 g) and compound **4** (10.6 g, 49 mmol) was heated to 120 °C for 24 h. The mixture was cooled, diluted with H<sub>2</sub>O (50 mL), and 5% KOH added at 0 °C until pH 7. The reaction mixture was extracted with Et<sub>2</sub>O (500 mL), and the extracts washed with H<sub>2</sub>O, dried (MgSO<sub>4</sub>) and evaporated to give a crude oil. This was purified by SiO<sub>2</sub> chromatography (hexane/EtOAc 9:1 as eluent), to afford compound **3** as a yellow oil (8.2 g, 78%): <sup>1</sup>H NMR (700 MHz; CDCl<sub>3</sub>) δ 1.15 (d, *J* = 7.0 Hz, 6H) 1.28 (s, 6H), 1.68-1.65 (m, 2H), 2.26 (s, 3H), 3.12-3.15 (m, 2H), 3.55 (sept, *J* = 7.0 Hz, 1H), 6.79 (t, *J* = 7.7 Hz, 1H), 6.97 (dd, *J* = 7.0, 0.7 Hz, 1H), 7.15 (dd, *J* = 7.7, 1.4 Hz, 1H); <sup>13</sup>C NMR (176 MHz; CDCl<sub>3</sub>) δ 20.5, 20.8, 32.2, 32.5, 37.8, 38.5, 53.0, 120.0, 124.1, 129.6, 130.1, 138.0, 146.0; IR (neat)  $\nu_{\max}/\text{cm}^{-1}$  2959s, 1591w, 1464s, 1426s, 1130s; MS (ES<sup>+</sup>): *m/z* = 218 [M+H]<sup>+</sup>; HRMS (ES) calcd for C<sub>15</sub>H<sub>24</sub>N [M+H]<sup>+</sup>: 218.1903, found: 218.1904.

### 6-Bromo-4,4,8-trimethyl-1-(propan-2-yl)-1,2,3,4-tetrahydroquinoline (7)

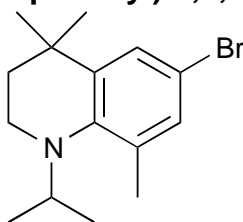

A stirred solution of compound **3** (2.30 g, 10.6 mmol) in chloroform (20 mL) was cooled to -60 °C in an acetone bath using a cryostat. Bromine (0.515 ml, 10.1 mmol) was then added dropwise to the reaction mixture. The temperature was raised gradually to -30 °C over a period of 1 h, after which the mixture was washed with a saturated solution of NaHCO<sub>3</sub> (3 × 20 mL), and the organics dried (MgSO<sub>4</sub>) and evaporated. The crude oil was purified by filtering through a pad of neutral alumina (hexane/EtOAc 9:1 as eluent) to give compound **7** as a colourless oil after evaporation (1.95 g, 62%): <sup>1</sup>H NMR (600 MHz; CDCl<sub>3</sub>) δ 1.13 (d, *J* = 6.6 Hz, 6H), 1.26 (s, 6H), 1.62-1.65 (m, 2H), 2.22 (s, 3H), 3.09-3.12 (m, 2H), 3.48 (sept, *J* = 6.6 Hz), 7.08 (d, *J* = 2.4 Hz, 1H), 7.21 (d, *J* = 2.4 Hz, 1H); <sup>13</sup>C NMR (151 MHz; CDCl<sub>3</sub>) δ 20.3, 20.7, 31.9, 32.8, 37.3, 38.4, 53.1, 112.6, 126.8, 132.0, 132.4, 140.2, 145.2; IR (neat)  $\nu_{\max}/\text{cm}^{-1}$  2960s, 1468s, 860s, 829m, 742m; MS (EI): *m/z* = 296 [M + H]<sup>+</sup>; HRMS (ES) calcd for C<sub>15</sub>H<sub>23</sub>NBr [M + H]<sup>+</sup>: 296.1014, found: 296.1004.

#### 4-[(2-Methylphenyl)amino]butan-2-one (**8**)

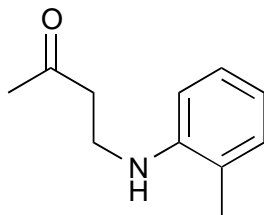

*o*-Toluidine, **5**, (2.68 mL, 25 mmol) and methyl vinyl ketone (2.03 mL, 25 mmol) were added to H<sub>2</sub>O (50 mL) and the mixture was stirred vigorously for 48 h in the absence of light. The resultant product was extracted with EtOAc, washed with H<sub>2</sub>O and brine, dried (MgSO<sub>4</sub>) and evaporated to give a crude brown oil which was purified by distillation under vacuum using a Kugelrohr apparatus (approx. 0.5 Torr, **8** isolated between 80–110 °C) to give compound **8** as a colourless oil (2.26 g, 51%): <sup>1</sup>H NMR (700 MHz, CDCl<sub>3</sub>) δ 2.14 (s, 3H), 2.18 (s, 3H), 2.79 (t, *J* = 6.2 Hz, 2H), 3.48 (t, *J* = 6.2 Hz, 2H), 3.92 (br, 1H), 6.64 (d, *J* = 8.0 Hz, 1H), 6.69 (td, *J* = 7.3, 0.9 Hz, 1H), 7.08 (d, *J* = 7.3 Hz, 1H), 7.15 (td, *J* = 7.3, 0.9 Hz, 1H); <sup>13</sup>C NMR (176 MHz, CDCl<sub>3</sub>) δ 17.5, 30.4, 38.4, 42.7, 109.7, 117.3, 122.6, 127.2, 130.4, 145.8, 208.3; IR (neat)  $\nu_{\max}/\text{cm}^{-1}$  3414w, 2980w, 2930w, 1708s, 1605, 1510s, 1448m, 1317m, 1263m, 1167s, 745s, 716m; MS(ES): *m/z* = 178.1 [M+H]<sup>+</sup>; HRMS (ES) calcd. for C<sub>11</sub>H<sub>16</sub>NO [M+H]<sup>+</sup>: 178.1232, found 178.1239 [5].

Note: Compound **8** turns dark brown upon standing, but no obvious degradation is observed by <sup>1</sup>H NMR.

#### 4,4,8-Trimethyl-1,2,3,4-tetrahydroquinoline (**10**)

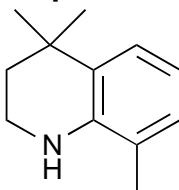

MeMgBr solution (3.0 M in Et<sub>2</sub>O, 8.27 mL, 24.82 mmol) was added dropwise to a solution of compound **8** (2.0 g, 11.28 mmol) in dry THF (60 mL) at –78 °C under Ar. The mixture was stirred overnight, before being quenched and neutralised with 5% HCl, diluted with EtOAc, washed with H<sub>2</sub>O and brine, dried (MgSO<sub>4</sub>) and evaporated to give a crude brown oil of compound **9** (1.9 g, approx. 80% by NMR). A portion of crude **9** (1.48 g, 7.66 mmol) was dissolved in DCM (50 mL) and conc. H<sub>2</sub>SO<sub>4</sub> (2 mL) added. The resultant solution was stirred at reflux for 4 h, before being cooled, neutralised with 5% NaOH (w/v), diluted with DCM, washed with H<sub>2</sub>O, dried (MgSO<sub>4</sub>) and evaporated to give a crude brown oil. This was purified using SiO<sub>2</sub> chromatography (hexane/EtOAc 9:1, with 1% Et<sub>3</sub>N as eluent) to give **10** as an orange oil (0.91 g, 68%): <sup>1</sup>H NMR (600 MHz, CDCl<sub>3</sub>) δ 1.33 (s, 6H), 1.76-1.79 (m, 2H), 2.11 (s, 3H), 3.39-3.41 (m, 2H), 3.75 (br, 1H), 6.62 (t, *J* = 7.5 Hz, 1H), 6.90 (d, *J* = 7.3 Hz, 1H), 7.13 (d, *J* = 8.5 Hz, 1H); <sup>13</sup>C NMR (151 MHz, CDCl<sub>3</sub>) δ 17.8, 31.5, 32.0, 37.5, 38.8, 116.5, 121.1, 124.5, 127.9, 129.9, 141.8; IR (neat)  $\nu_{\max}/\text{cm}^{-1}$  3418br, 2964m, 2920m, 2850m, 1597m, 1472s, 1355m, 1103m, 740s; *m/z* = 176.1 [M+H]<sup>+</sup>; HRMS (ES) calcd. for C<sub>12</sub>H<sub>18</sub>N [M+H]<sup>+</sup>: 176.1439, found 176.1442.



### ***N*-(4-iodo-2-methylphenyl)-3-methylbut-2-enamide (12)**

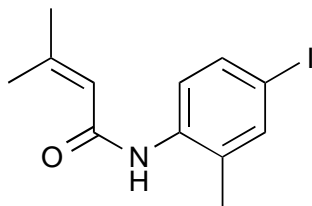

3,3-Dimethylacryloyl chloride (0.22 mL, 2.2 mmol) and pyridine (0.194 mL, 2.4 mmol) was added to a solution of 4-iodo-2-methylaniline (**11**, 0.466 g, 2.0 mmol) in DCM (30 mL). The resultant solution was stirred at rt for 6 h, and then diluted with DCM. The organics were washed with sat. NH<sub>4</sub>Cl, H<sub>2</sub>O and brine, dried (MgSO<sub>4</sub>) and evaporated to give a crude white solid (0.60 g). This was purified by SiO<sub>2</sub> chromatography (hexane/EtOAc 8:2, with 1% Et<sub>3</sub>N as eluent) to give compound **12** as a white solid (0.53 g, 84%): m.p. = 106-107 °C; <sup>1</sup>H NMR (400 MHz; CDCl<sub>3</sub>) δ 1.90 (s, 3H), 2.19 (s, 3H), 2.20 (d, *J* = 1.2 Hz, 3H), 5.72 (br, 1H), 6.86 (br, 1H), 7.47-7.51 (m, 2H), 7.69 (br, 1H); <sup>13</sup>C NMR (101 MHz; CDCl<sub>3</sub>) δ 17.6, 20.2, 27.6, 88.6, 118.4, 124.4, 130.8, 135.8, 136.1, 139.1, 154.3, 165.1; IR (neat)  $\nu_{\max}/\text{cm}^{-1}$  3293w, 2980w, 2940w, 1635s, 1508s, 1442m, 1390m, 1286s, 838s, 798m, 620w; MS(ES): *m/z* = 316.0 [M+H]<sup>+</sup>; HRMS (ES) calcd. for C<sub>12</sub>H<sub>15</sub>I<sub>1</sub>NO [M+H]<sup>+</sup>: 316.0198, found 316.0200; Found: C, 45.76; H, 4.46; N 4.36. Calc. for C<sub>12</sub>H<sub>14</sub>I<sub>1</sub>NO: C, 45.73; H, 4.48; N 4.44%.

### **6-iodo-4,4,8-trimethyl-1,2,3,4-tetrahydroquinolin-2-one (13)**

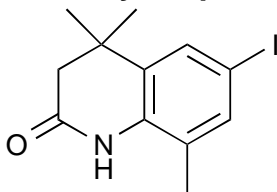

To a solution of compound **12** (0.13 g, 0.41 mmol) in DCM (15 mL) was added conc. H<sub>2</sub>SO<sub>4</sub> (1 mL), and the solution was stirred at reflux overnight. The resultant solution was neutralised with sat. K<sub>2</sub>CO<sub>3</sub> solution and diluted with DCM. The organics were washed with H<sub>2</sub>O and with brine, dried (MgSO<sub>4</sub>) and evaporated to give a crude orange solid (0.2 g). This was purified by SiO<sub>2</sub> chromatography (hexane/EtOAc 8:2, with 1% Et<sub>3</sub>N as eluent) to give compound **13** as a white solid (0.088 g, 67%): m.p. = 184-186 °C; <sup>1</sup>H NMR (700 MHz; CDCl<sub>3</sub>) δ 1.30 (s, 6H), 2.21 (s, 3H), 2.45 (s, 2H), 7.38 (d, *J* = 2.0 Hz, 1H), 7.43 (d, *J* = 2.0 Hz, 1H), 7.80 (br, 1H); <sup>13</sup>C NMR (176 MHz; CDCl<sub>3</sub>) δ 17.0, 27.7, 34.3, 45.1, 86.6, 125.7, 131.6, 134.4, 135.0, 137.8, 170.4; IR (neat)  $\nu_{\max}/\text{cm}^{-1}$  3189w, 2948w, 2926w, 1677s, 1474m, 1444m, 1361m, 1252m, 866s, 744m, 668w; MS(ES): *m/z* = 316.0 [M+H]<sup>+</sup>; HRMS (ES) calcd. for C<sub>12</sub>H<sub>15</sub>NOI [M+H]<sup>+</sup>: 316.0198, found 316.0197; Found: C, 45.65; H, 4.48; N 4.42. Calc. for C<sub>12</sub>H<sub>14</sub>NOI: C, 45.73; H, 4.48; N 4.44%.

### 6-Iodo-4,4,8-trimethyl-2-(propan-2-yloxy)-3,4-dihydroquinoline (15b)

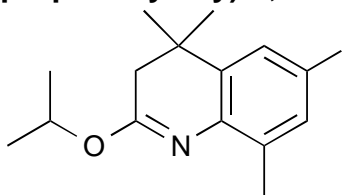

Compound **13** (0.8 g, 2.54 mmol) and NaH (60% dispersion in mineral oil, 0.15 g, 3.5 mmol) were added to a Schlenk flask. This was purged of air under vacuum and refilled with Ar, and anhydrous DMF (12 mL) was added. The resultant solution was heated at 80 °C for 1 h under Ar. The mixture was cooled, 2-iodopropane (0.51 mL, 5.08 mmol) was added and the mixture was stirred at 80 °C overnight. The resultant pale yellow solution was cooled and H<sub>2</sub>O and EtOAc added. The organics were washed with sat. NH<sub>4</sub>Cl, H<sub>2</sub>O and brine, dried (MgSO<sub>4</sub>) and evaporated to give a crude clear oil (1.0 g). This was purified using SiO<sub>2</sub> chromatography (hexane/EtOAc 8:2, with 1% Et<sub>3</sub>N as eluent) to give compound **15b** as a colourless solid (0.30 g, 33%): m.p. = 85-87 °C; <sup>1</sup>H NMR (700 MHz; CDCl<sub>3</sub>) δ 1.21 (s, 6H), 1.33 (d, *J* = 6.0 Hz, 6H), 2.19 (s, 2H), 2.30 (s, 3H), 5.39 (sept, *J* = 6.0 Hz, 1H), 7.38-7.40 (m, 2H); <sup>13</sup>C NMR (176 MHz; CDCl<sub>3</sub>) δ 17.7, 22.0, 27.7, 33.9, 40.1, 68.5, 88.2, 130.2, 135.8, 137.5, 138.1, 141.7, 164.7; IR (neat)  $\nu_{\max}/\text{cm}^{-1}$  2965w, 2916w, 2872w, 1617s, 1563m, 1372s, 1235s, 897s; MS(ES): *m/z* = 358.0 [M+H]<sup>+</sup>; HRMS (ES) calcd. for C<sub>15</sub>H<sub>21</sub>NOI [M+H]<sup>+</sup>: 358.0668, found 358.0660.

### 6-Iodo-4,4,8-trimethyl-1,2,3,4-tetrahydroquinoline (14)

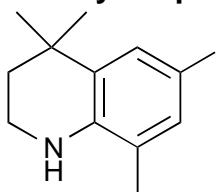

To a solution of compound **13** (0.4 g, 1.27 mmol) in dry toluene (20 mL) was added borane-dimethyl sulphide complex (0.13 mL, 1.35 mmol), and the solution was stirred at reflux overnight under Ar. The solution was then cooled, 10% aq Na<sub>2</sub>CO<sub>3</sub> added (10 mL), and then stirred for 0.5 h. The solution was then diluted with EtOAc, washed with H<sub>2</sub>O and brine, dried (MgSO<sub>4</sub>) and evaporated to give a crude oil (0.33 g). This was purified by SiO<sub>2</sub> chromatography (hexane/EtOAc 8:2 with 1% Et<sub>3</sub>N as eluent) to give compound **14** as a white solid (0.30 g, 79%): m.p. = 84-86 °C; <sup>1</sup>H NMR (700 MHz; CDCl<sub>3</sub>) δ 1.28 (s, 6H), 1.70-1.72 (m, 2H), 2.03 (s, 3H), 3.35-3.37 (m, 2H), 3.75 (br, 1H), 7.16 (d, *J* = 2.0 Hz, 1H), 7.33 (d, *J* = 2.0 Hz, 1H); <sup>13</sup>C NMR (176 MHz; CDCl<sub>3</sub>) δ 17.3, 31.2, 32.1, 36.9, 38.6, 77.5, 123.7, 132.4, 133.1, 136.1, 141.4; IR (neat)  $\nu_{\max}/\text{cm}^{-1}$  3441w, 2960w, 2926w, 1581m, 1496s, 1442m, 1350m, 1280s, 859s, 746m, 604w; MS(ES): *m/z* = 302.0 [M+H]<sup>+</sup>; HRMS (ES) calcd. for C<sub>12</sub>H<sub>17</sub>NI [M+H]<sup>+</sup>: 302.0406, found 302.0404.

Note: Compound **14** slowly turns from white to red/brown on standing, with some decomposition when stored for prolonged periods.

### 6-Iodo-1,4,4,8-tetramethyl-1,2,3,4-tetrahydroquinoline (16)

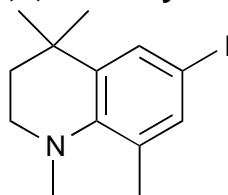

To a solution of compound **14** (0.367 g, 1.22 mmol) in anhydrous DMF (15 mL), was added NaH (60% dispersion in mineral oil, 0.060 g, 1.4 mmol) and the resultant slurry was stirred for 2 h at 80 °C under Ar. The solution was cooled, iodomethane (0.174 mL, 2.8 mmol) added, and then stirred overnight at rt. The solution was quenched with H<sub>2</sub>O and extracted with EtOAc. The organics were washed with sat. NH<sub>4</sub>Cl, H<sub>2</sub>O and brine, dried (MgSO<sub>4</sub>) and evaporated to give a crude orange oil (0.39 g). This was purified by SiO<sub>2</sub> chromatography (hexane/EtOAc 9:1, with 1% Et<sub>3</sub>N as eluent) to give compound **16** as a clear oil (0.165 g, 43%): <sup>1</sup>H NMR (700 MHz; CDCl<sub>3</sub>) δ 1.28 (s, 6H), 1.64-1.71 (m, 2H), 2.24 (s, 3H), 2.69 (s, 3H), 3.07-3.10 (m, 2H), 7.28-7.30 (m, 1H), 7.42 (d, *J* = 2.0 Hz, 1H); <sup>13</sup>C NMR (176 MHz; CDCl<sub>3</sub>) δ 18.6, 31.7, 32.7, 33.0, 42.6, 48.4, 85.1, 133.5, 133.9, 137.3, 141.0, 146.8; IR (neat)  $\nu_{\max}/\text{cm}^{-1}$  2959m, 2928m, 2890m, 1470s, 1142s, 860s, 733m, 653m; MS(ES): *m/z* = 316.0 [M+H]<sup>+</sup>; HRMS (ES) calcd. for C<sub>13</sub>H<sub>19</sub>NI [M+H]<sup>+</sup>: 316.0562, found 316.0566.

### *N*-(4-Iodophenyl)-3-methylbut-2-enamide (18)

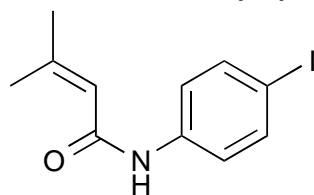

To a solution of 4-iodoaniline (**17**, 25.0 g, 114.0 mmol) in DCM (400 mL) was added 3,3-dimethylacryloyl chloride (13.36 mL, 120.0 mmol) and the resultant white suspension was stirred for 0.5 h, after which pyridine (9.70 mL, 120 mmol) was added and the solution stirred at rt for 16 h. The solution was diluted with DCM and H<sub>2</sub>O, washed with sat. NH<sub>4</sub>Cl, H<sub>2</sub>O and brine, dried (MgSO<sub>4</sub>) and evaporated to give a crude light brown solid (33 g) which was recrystallised from EtOH to give **18** as a white crystalline solid (31.8 g, 93%): m.p. = 136-138 °C; <sup>1</sup>H NMR (700 MHz, CDCl<sub>3</sub>) δ 1.91 (s, 3H), 2.22 (s, 3H), 5.68 (s, 1H), 7.01 (s, 1H), 7.33 (m, 2H), 7.60 (d, *J* = 8.8 Hz, 2H); <sup>13</sup>C NMR (101 MHz, CDCl<sub>3</sub>) δ 20.2, 27.6, 87.2, 118.7, 122.0, 137.8, 138.2, 154.1, 165.5; IR (neat)  $\nu_{\max}/\text{cm}^{-1}$  3294m, 3094, 2964w, 2890w, 1666m, 1586m, 1430m, 821s, 650m; MS (ES): *m/z* = 302.0 [M+H]<sup>+</sup>; HRMS (ES) calcd. for C<sub>11</sub>H<sub>13</sub>NOI [M+H]<sup>+</sup>: 302.0042, found: 302.0050; Found: C, 43.87; H, 4.02; N 4.64. Calc. for C<sub>11</sub>H<sub>12</sub>NOI: C, 43.88; H, 4.02; N 4.65%.

### 6-Iodo-4,4-dimethyl-1,2,3,4-tetrahydroquinolin-2-one (19)

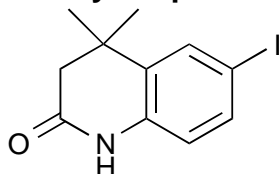

Compound **18** (11.5 g, 38.3 mmol) and  $\text{AlCl}_3$  (7.66 g, 57.5 mmol) were added to anhydrous DCM (150 mL) under Ar and the resultant solution was stirred vigorously for 2.5 h at rt. The reaction was cooled to 0 °C, quenched slowly with  $\text{H}_2\text{O}$ , diluted with DCM, stirred with 5% NaOH (w/v) until the solution turned off-white, then further washed with  $\text{H}_2\text{O}$  and brine, dried ( $\text{MgSO}_4$ ) and evaporated to give a crude yellow solid (12.0 g). This was recrystallised from EtOH to give **19** as a white crystalline solid (10.2 g, 88%): m.p. = 199-202 °C;  $^1\text{H}$  NMR (700 MHz,  $\text{CDCl}_3$ )  $\delta$  1.32 (s, 6H), 2.47 (s, 2H), 6.62 (d,  $J$  = 8.3 Hz, 1H), 7.47 (dd,  $J$  = 8.3, 1.9 Hz, 1H), 7.56 (d,  $J$  = 1.8 Hz, 1H), 9.20 (s, 1H);  $^{13}\text{C}$  NMR (176 MHz,  $\text{CDCl}_3$ )  $\delta$  27.7, 34.2, 45.2, 86.8, 118.1, 133.7, 135.1, 135.9, 136.6, 171.3; IR (neat)  $\nu_{\text{max}}/\text{cm}^{-1}$  3164m, 3102, 3040w, 2953m, 1671s, 1596m, 1484m, 817s; MS (ES):  $m/z$  = 302.0  $[\text{M}+\text{H}]^+$ ; HRMS (ES) calcd. for  $\text{C}_{11}\text{H}_{13}\text{NOI}$   $[\text{M}+\text{H}]^+$ : 302.0042, found: 302.0042; Found: C, 43.91; H, 4.02; N 4.63. Calc. for  $\text{C}_{11}\text{H}_{12}\text{NOI}$ : C, 43.88; H, 4.02; N 4.65%.

### 6-Iodo-4,4-dimethyl-1-(propan-2-yl)-1,2,3,4-tetrahydroquinolin-2-one (20a)

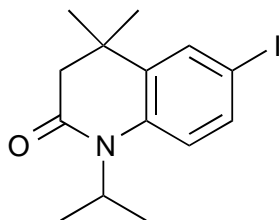

To a solution of compound **19** (25.9 g, 85.9 mmol) in anhydrous DMF (200 mL) was added crushed KOH (14.5 g, 257 mmol) and the resultant slurry was stirred for 1 h at 50 °C under Ar. To this was added 2-iodopropane (25.6 mL, 257 mmol) and the solution stirred at 50 °C for 40 h under Ar. The reaction was quenched with  $\text{H}_2\text{O}$ , diluted with EtOAc, washed with sat.  $\text{NH}_4\text{Cl}$ ,  $\text{H}_2\text{O}$  and brine, dried ( $\text{MgSO}_4$ ) and evaporated to give a crude clear oil (29.0 g). This was purified by  $\text{SiO}_2$  chromatography (hexane/EtOAc 9:1, with 1%  $\text{Et}_3\text{N}$  as eluent) to give compound **20a** as a colourless oil (14.8 g, 50%):  $R_f$  0.51 (hexane/EtOAc 8:2, with 1%  $\text{Et}_3\text{N}$ );  $^1\text{H}$  NMR (400 MHz,  $\text{CDCl}_3$ )  $\delta$  1.25 (s, 6H), 1.50 (d,  $J$  = 7.0 Hz, 6H), 2.38 (s, 2H), 4.66 (sept,  $J$  = 7.0 Hz, 1H), 6.87 (d,  $J$  = 8.6 Hz, 1H), 7.50 (dd,  $J$  = 8.6, 2.1 Hz, 1H), 7.52 (d,  $J$  = 2.1 Hz, 1H);  $^{13}\text{C}$  NMR (101 MHz,  $\text{CDCl}_3$ )  $\delta$  20.3, 26.8, 33.1, 47.2, 48.8, 86.9, 119.0, 133.4, 135.9, 139.1, 139.3, 169.8; IR (neat)  $\nu_{\text{max}}/\text{cm}^{-1}$  2961m, 2934w, 2870w, 1667s, 1582m, 1482m, 809s; MS (ES):  $m/z$  = 344.0  $[\text{M}+\text{H}]^+$ ; HRMS (ES) calcd. for  $\text{C}_{14}\text{H}_{19}\text{NOI}$   $[\text{M}+\text{H}]^+$ : 344.0511, found: 344.0512; Found: C, 49.21; H, 5.29; N 4.08. Calc. for  $\text{C}_{14}\text{H}_{18}\text{NOI}$ : C, 48.99; H, 5.29; N 4.08%.

Note: Compound **20a** was found to slowly solidify on standing over a number of weeks.

### 6-Iodo-4,4-dimethyl-2-(propan-2-yloxy)-3,4-dihydroquinoline (20b)

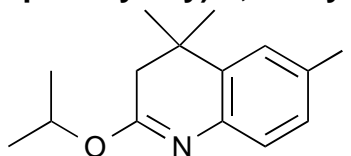

Compound **20b** was isolated as a byproduct of the alkylation of **19**, by SiO<sub>2</sub> chromatography (hexane/EtOAc 9:1, with 1% Et<sub>3</sub>N as eluent) to give compound **20b** as a colourless oil (7.6 g, 26%): *R<sub>f</sub>* 0.71 (hexane/EtOAc 8:2, with 1% Et<sub>3</sub>N); <sup>1</sup>H NMR (700 MHz, CDCl<sub>3</sub>) δ 1.23 (s, 6H), 1.32 (d, *J* = 7.0 Hz, 6H), 2.21 (s, 2H), 5.40 (sept, *J* = 6.2 Hz, 1H), 6.88 (d, *J* = 8.2 Hz, 1H), 7.50 (dd, *J* = 8.2, 2.0 Hz, 1H), 7.53 (d, *J* = 2.0 Hz, 1H); <sup>13</sup>C NMR (176 MHz, CDCl<sub>3</sub>) δ 22.1, 27.6, 33.7, 40.3, 68.4, 88.5, 127.3, 132.6, 136.4, 138.5, 143.6, 166.2; IR (neat) *v*<sub>max</sub>/cm<sup>-1</sup> 2960m, 2934w, 2872w, 1625s, 1586m, 1469m, 824s; MS (ES): *m/z* = 344.0 [M+H]<sup>+</sup>; HRMS (ES) calcd. for C<sub>14</sub>H<sub>19</sub>NOI [M+H]<sup>+</sup>: 344.0511, found: 344.0513.

Note: Compound **20b** was found to slowly solidify on standing over a number of weeks.

### 6-Iodo-4,4-dimethyl-1-(propan-2-yl)-1,2,3,4-tetrahydroquinoline (21)

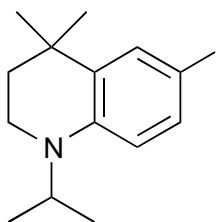

To a solution of compound **20a** (1.25 g, 3.63 mmol) in anhydrous toluene (15 mL) was added borane-dimethyl sulfide complex (2.0 M in THF, 1.91 mL, 3.81 mmol) dropwise and the resultant solution stirred at reflux for 16 h under Ar. The solution was cooled to rt, 10% aq Na<sub>2</sub>CO<sub>3</sub> (25 mL) added and then stirred for 0.5 h. The resultant solution was diluted with EtOAc, washed with H<sub>2</sub>O and brine, dried (MgSO<sub>4</sub>) and evaporated to give a crude colourless oil (1.12 g). This was purified by SiO<sub>2</sub> chromatography (hexane/EtOAc 9:1, with 1% Et<sub>3</sub>N as eluent) to give compound **21** as a colourless oil (1.08 g, 90%): <sup>1</sup>H NMR (700 MHz, CDCl<sub>3</sub>) δ 1.19 (d, *J* = 6.6 Hz, 6H), 1.24 (s, 6H), 1.65-1.67 (m, 2H), 3.14-3.17 (m, 2H), 4.06 (sept, *J* = 6.6 Hz, 1H), 6.46 (d, *J* = 8.8 Hz, 1H), 7.28 (dd, *J* = 8.9, 2.1 Hz, 1H), 7.39 (d, *J* = 2.2 Hz, 1H); <sup>13</sup>C NMR (176 MHz, CDCl<sub>3</sub>) δ 18.9, 30.3, 32.4, 36.6, 36.8, 47.3, 76.1, 113.4, 134.5, 134.8, 135.6, 144.0; IR (neat) *v*<sub>max</sub>/cm<sup>-1</sup> 2957m, 2927w, 2863w, 1580m, 1489m, 792s, 684w; MS (ES): *m/z* = 330.1 [M+H]<sup>+</sup>; HRMS (ES) calcd. for C<sub>14</sub>H<sub>21</sub>NI [M+H]<sup>+</sup>: 330.0719, found: 330.0717.

Note: Compound **21** slowly turns a red/pink colour when stored for prolonged periods, and ideally should be derivatised further as soon as possible.

### 6-Iodo-4,4-dimethyl-1-(propan-2-yl)-1,4-dihydroquinoline (22)

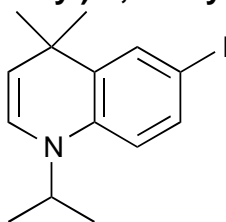

A solution of compound **20a** (0.95 g, 2.77 mmol) in anhydrous toluene (24 mL) was heated to reflux under Ar. DIBAL (1.0 M in cyclohexane) (3.05 mL, 3.05 mmol) was then added dropwise, and the resultant solution stirred rapidly for 1 h. The reaction mixture was then carefully quenched with 20% aq. NaOH (w/v), cooled, diluted with EtOAc, washed with H<sub>2</sub>O and brine, dried (MgSO<sub>4</sub>) and evaporated to give a crude colourless oil. This was purified by neutral Al<sub>2</sub>O<sub>3</sub> chromatography (hexane/DCM 98:2 as eluent) to give compound **22** as a colourless oil (0.60 g, 66%); <sup>1</sup>H NMR (400 MHz, CDCl<sub>3</sub>) δ 1.26 (d, *J* = 6.4 Hz, 6H), 1.27 (s, 6H), 4.12 (sept, *J* = 6.6 Hz, 1H), 4.53 (d, *J* = 7.9 Hz, 1H), 6.15 (d, *J* = 7.9 Hz, 1H), 6.56 (d, *J* = 9.1 Hz, 1H), 7.36 (dd, *J* = 8.8, 2.2 Hz, 1H), 7.45 (d, *J* = 2.2 Hz, 1H); <sup>13</sup>C NMR (101 MHz, CDCl<sub>3</sub>) δ 20.8, 32.8, 33.3, 47.0, 81.8, 109.8, 113.5, 122.9, 134.6, 135.1, 135.2, 139.7; IR (neat)  $\nu_{\max}/\text{cm}^{-1}$  2961w, 2925w, 2853w, 1668m, 1581m, 1478s, 1418m, 1206s, 1054m, 796s; MS (ES): *m/z* = 328.1 [M+H]<sup>+</sup>; HRMS (ES) calcd. for C<sub>14</sub>H<sub>19</sub>NI [M+H]<sup>+</sup>: 328.0554, found: 328.0562.

Note: Compound **22** slowly turns a red/pink colour when stored for prolonged periods, and ideally should be derivatised further as soon as possible.

### 4-Phenyl-1,2,3,4-tetrahydroquinolin-2-one (23a)

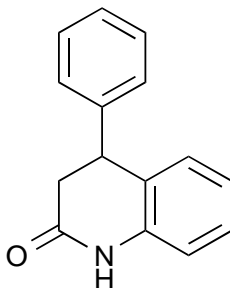

To a solution of aniline (5.87 g, 54.8 mmol) in DCM (200 mL) was added cinnamoyl chloride (9.58 g, 57.5 mmol). The resultant suspension was stirred for 0.5 h, after which pyridine (4.65 mL, 57.5 mmol) was added and the solution stirred at rt for 4 h. The solution was diluted with DCM, washed with sat. NH<sub>4</sub>Cl, and H<sub>2</sub>O, dried (MgSO<sub>4</sub>) and evaporated to give a crude light brown solid. This was recrystallised from EtOH to give (2*E*)-*N*,3-diphenylprop-2-enamide as a colourless crystalline solid (12.08 g, 92%). Polyphosphoric acid (20 g) was heated to 120 °C, whereupon (2*E*)-*N*,3-diphenylprop-2-enamide (1 g, 4.48 mmol) was added, and the mixture stirred for 10 minutes. This was cooled, before crushed ice was added, and the resultant slurry stirred rapidly for 20 minutes. The mixture was then extracted with CHCl<sub>3</sub>, washed with H<sub>2</sub>O, dried (MgSO<sub>4</sub>) and evaporated to give a crude orange solid. This was recrystallised from EtOH/H<sub>2</sub>O (1:1) to give compound **23a** as a white solid (0.58 g, 58%): <sup>1</sup>H NMR (700 MHz; CDCl<sub>3</sub>) δ 2.89-2.99 (m, 2H), 4.31 (t, *J* = 8.5 Hz, 1H), 6.86 (d, *J* = 7.4 Hz, 1H), 6.92 (d, *J* = 7.5 Hz, 1H), 6.97

(td,  $J = 7.5, 1.2$  Hz, 1H), 7.19-7.22 (m, 3H), 7.26–7.30 (m, 1H), 7.34 (t,  $J = 7.6$  Hz, 2H), 8.53 (br, 1H, H7); Found: C, 80.85; H, 5.88; N, 6.21. Calc. for  $C_{15}H_{13}NO$ : C, 80.69; H, 5.87; N, 6.27%; all other spectroscopic and analytical data were identical to those reported in the literature [6,7].

Note: Compound **23a** can also be purified via Kugelrohr distillation (190–210 °C, 0.8 Torr).

### 1-Methyl-4-phenyl-1,2,3,4-tetrahydroquinolin-2-one (23b)

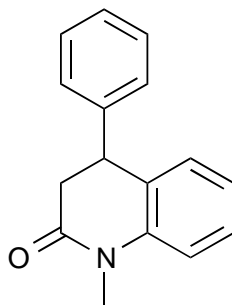

A solution of compound **23a** (0.30 g, 1.34 mmol) in anhydrous DMF (8 mL) was cooled to 0 °C under Ar, whereupon NaH (60% dispersion in mineral oil, 0.089 g, 2.02 mmol) was added, and the resultant slurry was stirred for 1 h. Iodomethane (0.1 mL, 1.61 mmol) was added, and the solution was stirred at rt for 40 h. The solution was diluted with  $H_2O$ , and extracted with EtOAc. The organics were washed with sat.  $NH_4Cl$ ,  $H_2O$  and brine, dried ( $MgSO_4$ ) and evaporated to give a crude colourless oil. This was purified by  $SiO_2$  chromatography (hexane/EtOAc 9:1, with 1%  $Et_3N$  as eluent) to give compound **23b** as a white solid (0.98 g, 97%); m.p. 108-110 °C;  $^1H$  NMR (700 MHz;  $CDCl_3$ )  $\delta$  2.92–3.02 (m, 2H), 3.40 (s, 3H), 4.21–4.26 (m, 1H), 6.93 (d,  $J = 7.5$  Hz, 1H), 7.00 (t,  $J = 7.5$  Hz, 1H), 7.06 (d,  $J = 8.1$  Hz, 1H), 7.17 (d,  $J = 7.4$  Hz, 2H), 7.27 (d,  $J = 7.4$  Hz, 1H), 7.30 (t,  $J = 8.3$  Hz, 1H), 7.34 (t,  $J = 7.4$  Hz, 2H);  $^{13}C$  NMR (176 MHz,  $CDCl_3$ )  $\delta$  29.7, 39.0, 41.7, 115.1, 123.2, 127.4, 128.0, 128.1, 128.2, 129.0, 129.3, 140.6, 141.2, 169.5; IR (neat)  $\nu_{max}/cm^{-1}$  3062w, 3039, 2977w, 1663s, 1596s, 1498m, 1457m, 1370s, 1275m, 759s; MS (ES):  $m/z = 238.1$   $[M+H]^+$ ; HRMS (ES) calcd. for  $C_{16}H_{16}NO$   $[M+H]^+$ : 238.1232, found 238.1240; Found: C, 80.97; H, 6.43; N, 5.76. Calc. for  $C_{16}H_{15}NO$ : C, 80.98; H, 6.37; N, 5.90% [8].

### 1-Ethyl-1,2,3,4-tetrahydroquinolin-2-one (23d)

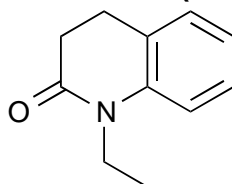

A solution of 3,4-dihydro-2(1*H*)-quinolinone (2.21 g, 15.0 mmol) in anhydrous DMF (25 mL) was cooled to 0 °C under Ar, whereupon NaH (60% dispersion in mineral oil, 0.99 g, 22.5 mmol) was added, and the resultant slurry was stirred for 30 min. Iodoethane (1.61 mL, 20.0 mmol) was added, and the solution was stirred at rt for 40 h. The solution was diluted with  $H_2O$ , and extracted with EtOAc. The organics were washed with sat.  $NH_4Cl$ ,  $H_2O$  and

brine, dried (MgSO<sub>4</sub>) and evaporated to give a crude yellow oil. This was purified by SiO<sub>2</sub> chromatography (hexane/EtOAc 75:25, with 1% Et<sub>3</sub>N as eluent) to give compound **23d** as a light yellow oil (2.38 g, 91%); <sup>1</sup>H NMR (600 MHz; CDCl<sub>3</sub>) δ 1.26 (t, *J* = 7.1 Hz, 3H), 2.60-2.67 (m, 2H), 2.87-2.90 (m, 2H), 3.99 (q, *J* = 7.1 Hz, 2H), 6.97-7.04 (m, 2H), 7.16 (dd, *J* = 7.5, 1.4 Hz, 1H), 7.24 (t, *J* = 7.5 Hz, 1H); <sup>13</sup>C NMR (151 MHz; CDCl<sub>3</sub>) δ 13.0, 25.8, 32.1, 37.5, 114.8, 122.8, 126.7, 127.6, 128.2, 139.8, 170.1; IR (neat)  $\nu_{\max}/\text{cm}^{-1}$  2975w, 2936w, 2849w, 1667s, 1602s, 1500m, 1463m, 1376s, 1255s, 756s; MS (ES): *m/z* = 176.1 [M+H]<sup>+</sup>; HRMS (ES) calcd. for C<sub>11</sub>H<sub>14</sub>NO [M+H]<sup>+</sup>: 176.1075, found 176.1077 [9].

### 1-Benzyl-1,2,3,4-tetrahydroquinolin-2-one (23e)

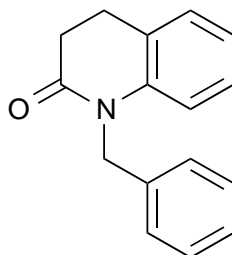

A solution of 3,4-dihydro-2(1*H*)-quinolinone (4.42 g, 30.0 mmol) in anhydrous DMF (50 mL) was cooled to 0 °C under Ar, whereupon NaH (60% dispersion in mineral oil, 1.98 g, 45.0 mmol) was added, and the resultant slurry was stirred for 1 h. Benzyl chloride (4.14 mL, 36.0 mmol) was added, and the solution was stirred at rt for 40 h. The solution was diluted with H<sub>2</sub>O, and extracted with EtOAc. The organics were washed with sat. NH<sub>4</sub>Cl, H<sub>2</sub>O and brine, dried (MgSO<sub>4</sub>) and evaporated to give a crude colourless oil. This was purified by SiO<sub>2</sub> chromatography (hexane/EtOAc 9:1, with 1% Et<sub>3</sub>N as eluent) to give compound **23e** as a white waxy solid (4.83 g, 68%); m.p. 56-57 °C; <sup>1</sup>H NMR (600 MHz; CDCl<sub>3</sub>) δ 2.77-2.83 (m, 2H), 2.99 (dd, *J* = 8.7, 6.1 Hz, 2H), 5.19 (s, 2H), 6.88(d, *J* = 8.2 Hz, 1H), 6.97 (t, *J* = 7.4Hz, 1H), 7.10 (td, *J* = 7.8, 1.5 Hz, 1H), 7.17 (d, *J* = 7.3 Hz, 1H), 7.20-7.26 (m, 3H), 7.29-7.32 (m, 2H); <sup>13</sup>C NMR (151 MHz; CDCl<sub>3</sub>) δ 25.8, 32.1, 46.4, 115.8, 123.1, 126.5, 126.6, 127.2, 127.6, 128.0, 128.9, 137.2, 140.1, 170.7; IR (neat)  $\nu_{\max}/\text{cm}^{-1}$  3064w, 3027w, 2999w, 1670s, 1600m, 1495s, 1462m, 1373s, 1180, 758s; MS (ES): *m/z* = 238.1 [M+H]<sup>+</sup>; HRMS (ES) calcd. for C<sub>16</sub>H<sub>16</sub>NO [M+H]<sup>+</sup>: 238.1232, found 238.1228; Found: C, 80.79; H, 6.43; N, 5.87. Calc. for C<sub>16</sub>H<sub>15</sub>NO: C, 80.98; H, 6.37; N, 5.90% [4].

### 6-Bromo-4,4-dimethyl-1-(propan-2-yl)-1,2,3,4-tetrahydroquinolin-2-one

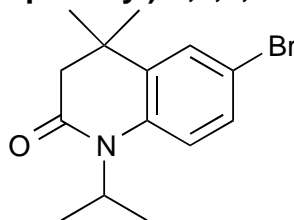

To a solution of 4-bromoaniline (5.0 g, 29.1 mmol) in DCM (100 mL) was added 3,3-dimethylacryloyl chloride (3.40 mL, 30.6 mmol) and the resultant white suspension was stirred for 0.5 h, after which pyridine (9.70 mL, 30.6



mmol) was added and the solution stirred at rt for 16 h. The solution was diluted with DCM and H<sub>2</sub>O, washed with sat. NH<sub>4</sub>Cl, H<sub>2</sub>O, dried (MgSO<sub>4</sub>) and evaporated to give a crude light brown solid (33 g) which was recrystallised from hexane to give *N*-(4-bromophenyl)-3-methylbut-2-enamide as a white solid (6.87 g, 94%). *N*-(4-Bromophenyl)-3-methylbut-2-enamide (4.5 g, 17.7 mmol) and AlCl<sub>3</sub> (3.54 g, 26.6 mmol) were added to anhydrous DCM (90 mL) under Ar and the resultant solution stirred vigorously for 2.5 h at rt. The reaction was then cooled to 0 °C, quenched slowly with H<sub>2</sub>O, diluted with DCM, stirred with 20% NaOH (w/v) until the solution turned off-white, then further washed with H<sub>2</sub>O, dried (MgSO<sub>4</sub>) and evaporated to give 6-bromo-4,4-dimethyl-1,2,3,4-tetrahydroquinolin-2-one (4.07 g, 90%). To a solution of 6-bromo-4,4-dimethyl-1,2,3,4-tetrahydroquinolin-2-one (4.07 g, 16.02 mmol) in anhydrous DMF (50 mL) was added crushed KOH (2.70 g, 48.06 mmol) and the resultant slurry stirred for 1 h at 50 °C under Ar. To this was added 2-iodopropane (4.8 mL, 48.06 mmol) and the solution stirred at 50 °C for 40 h. The reaction was quenched with H<sub>2</sub>O, diluted with EtOAc, washed with sat. NH<sub>4</sub>Cl, H<sub>2</sub>O and brine, dried (MgSO<sub>4</sub>) and evaporated to give a crude clear oil. This was purified by SiO<sub>2</sub> chromatography (hexane/EtOAc 9:1, with 1% Et<sub>3</sub>N as eluent) to give 6-bromo-4,4-dimethyl-1-(propan-2-yl)-1,2,3,4-tetrahydroquinolin-2-one as a colourless oil (2.19 g, 46%): <sup>1</sup>H NMR (700 MHz; CDCl<sub>3</sub>) δ 1.27 (s, 6H), 1.51 (d, *J* = 7.0 Hz, 6H), 2.40 (s, 2H), 4.68 (sept, *J* = 7.1 Hz, 1H), 7.00 (d, *J* = 8.7 Hz, 1H), 7.32 (dd, *J* = 8.7, 2.3 Hz, 1H), 7.36 (d, *J* = 2.3 Hz, 1H); <sup>13</sup>C NMR (176 MHz; CDCl<sub>3</sub>) δ 20.4, 26.8, 33.2, 47.2, 48.9, 116.4, 118.6, 127.6, 129.9, 138.6, 138.9, 169.8; IR (neat)  $\nu_{\max}/\text{cm}^{-1}$  2964m, 2934w, 2872w, 1671s, 1590m, 1484s, 1417m, 1332s, 1253s, 811s; MS (ES): *m/z* = 296.4 [M+H]<sup>+</sup>; HRMS (ES) calcd. for C<sub>14</sub>H<sub>19</sub>NOBr [M+H]<sup>+</sup>: 296.0650, found: 296.0658.

### 6-Bromo-4,4-dimethyl-1-(propan-2-yl)-1,2,3,4-tetrahydroquinoline (26)

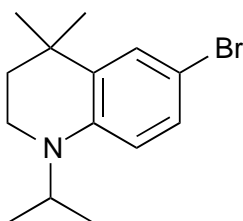

To a solution of 6-bromo-4,4-dimethyl-1-(propan-2-yl)-1,2,3,4-tetrahydroquinolin-2-one (1.17 g, 3.96 mmol) in anhydrous toluene (20 mL) under Ar was added borane dimethyl sulfide complex (2.0 M in THF, 2.0 mL, 4.00 mmol) dropwise and the resultant solution stirred under reflux for 16 h. The solution was cooled to rt, 10% aq Na<sub>2</sub>CO<sub>3</sub> (25 ml) added and the solution stirred for 0.5 h. The solution was then diluted with EtOAc, washed with brine, dried (MgSO<sub>4</sub>) and evaporated to give a crude colourless oil. This was purified by SiO<sub>2</sub> chromatography (hexane/EtOAc 9:1, with 1% Et<sub>3</sub>N as eluent) to give compound **26** as a colourless oil (1.00 g, 89%): <sup>1</sup>H NMR (700 MHz; CDCl<sub>3</sub>) δ 1.19 (d, *J* = 6.6 Hz, 6H), 1.25 (s, 6H), 1.67 (t, *J* = 6.1 Hz, 2H), 3.14 (t, *J* = 6.1 Hz, 2H), 4.05 (sept, *J* = 6.6 Hz, 1H), 6.55 (d, *J* = 8.7 Hz, 1H), 7.11 (dd, *J* = 8.9, 2.2 Hz, 1H), 7.23 (d, *J* = 2.3 Hz, 1H); <sup>13</sup>C NMR (101 MHz, CDCl<sub>3</sub>) δ 18.9, 30.3, 32.5, 36.6, 36.9, 47.4, 107.2, 112.7, 128.4, 128.7, 129.6, 134.2, 143.4; IR (neat)  $\nu_{\max}/\text{cm}^{-1}$  2966m, 2929w, 2866, 1587m, 1490, 1448, 793s; MS(ES):

$m/z = 282.4$   $[M+H]^+$ ; HRMS (ES) calcd. for  $C_{14}H_{21}NBr$   $[M+H]^+$ : 282.0857, found 282.0876.

### Methyl 4-(tetramethyl-1,3,2-dioxaborolan-2-yl)benzoate (**27**)

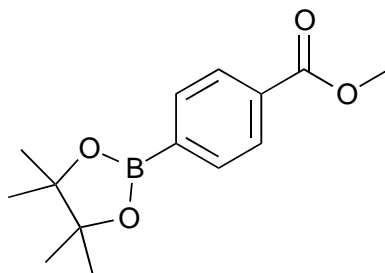

Methyl 4-iodobenzoate (1.57 g, 6.00 mmol),  $B_2Pin_2$  (1.68 g, 6.60 mmol), KOAc (1.77 g, 18.0 mmol) and  $Pd(dppf)Cl_2 \cdot CH_2Cl_2$  (0.147 g, 0.18 mmol) were added to anhydrous DMSO (12 mL, degassed via freeze-pump-thaw) under Ar. The resultant suspension was then stirred at 80 °C overnight. The mixture was cooled, diluted with  $H_2O$  and extracted with EtOAc (3 $\times$ ). The organics were washed with  $H_2O$  and brine, dried ( $MgSO_4$ ) and evaporated to give a crude solid (2.0 g). The crude solid was distilled under vacuum using a Kugelrohr (130–140 °C, 0.64 Torr) to give a white solid which was then recrystallised from MeOH at –20 °C to give compound **27** as a colourless crystalline solid (1.27 g, 81%); m.p. 77–78 °C;  $^1H$  NMR (700 MHz;  $CDCl_3$ )  $\delta$  1.35 (s, 12H) 3.91 (s, 3H), 7.85–7.89 (m, 2H), 8.00–8.04 (m, 2H);  $^{13}C$  NMR (176 MHz;  $CDCl_3$ )  $\delta$  25.1, 52.3, 84.4, 128.8, 132.5, 134.9, 167.3;  $^{11}B$  NMR (128 MHz,  $CDCl_3$ )  $\delta$  30.63; IR (neat)  $\nu_{max}/cm^{-1}$  2980w, 2955w, 2935w, 1719s, 1507m, 1398s, 1359s, 1267s, 707s; MS(EI):  $m/z = 262.1$   $[M]^+$ ; Found: C, 64.32; H, 7.27. Calc. for  $C_{14}H_{19}BO_4$ : C, 64.15; H, 7.31% [10].

Note: The  $^{13}C$  resonance for the carbon atom bonded to boron was not observed, despite processing with larger line broadening.

### Methyl 4-[4,4-dimethyl-1-(propan-2-yl)-1,2,3,4-tetrahydroquinolin-6-yl]benzoate (**28**)

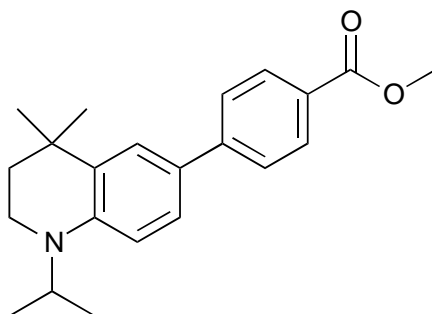

Compound **21** (0.0925 g, 0.281 mmol) was dissolved in DMSO/ $H_2O$  (6 mL, 5:1), and the resultant solution was degassed via freeze-pump-thaw. Under Ar, compound **27** (0.081 g, 0.309 mmol),  $K_3PO_4$  (0.12 g, 0.562 mmol) and  $Pd(dppf)Cl_2$  (6 mg, 0.00843 mmol) were added, and the resultant suspension was stirred at 80 °C for 16 h. The solution was cooled, diluted with  $H_2O$ , and extracted with EtOAc (3 $\times$ ). The organics were washed with  $H_2O$  and brine,

dried (MgSO<sub>4</sub>) and evaporated to give a crude solid. This was purified by SiO<sub>2</sub> chromatography (hexane/EtOAc 92:8, with 1% Et<sub>3</sub>N as eluent) to give compound **28** as a light yellow crystalline solid (0.065 g, 68%): m.p. 103-104 °C; <sup>1</sup>H NMR (700 MHz; CDCl<sub>3</sub>) δ 1.24 (d, *J* = 6.6 Hz, 6H), 1.34 (s, 6H), 1.69–1.79 (m, 2H), 3.18–3.29 (m, 2H), 3.92 (s, 3H), 4.19 (sept, *J* = 6.7 Hz, 1H), 6.77 (d, *J* = 8.7 Hz, 1H), 7.38 (dd, *J* = 8.6, 2.3 Hz, 1H), 7.50 (d, *J* = 2.4 Hz, 1H), 7.56–7.69 (m, 2H), 8.00–8.13 (m, 2H); <sup>13</sup>C NMR (176 MHz; CDCl<sub>3</sub>) δ 19.1, 30.4, 32.4, 36.7, 37.1, 47.4, 52.2, 111.2, 124.8, 125.8, 126.0, 126.2, 127.2, 130.2, 132.2, 144.7, 146.3, 167.5; IR (neat)  $\nu_{\max}/\text{cm}^{-1}$  2978w, 2953w, 2909w, 2847w, 1708s, 1596m, 1492m, 1434m, 1260s, 775s, MS(ES): *m/z* = 338.7 [M+H]<sup>+</sup>; HRMS (ES) calcd. for C<sub>22</sub>H<sub>28</sub>NO<sub>2</sub> [M+H]<sup>+</sup>: 338.2120, found 338.2121.

#### 4,4-Dimethyl-1-(propan-2-yl)-6-(tetramethyl-1,3,2-dioxaborolan-2-yl)-1,2,3,4-tetrahydroquinoline (**29**)

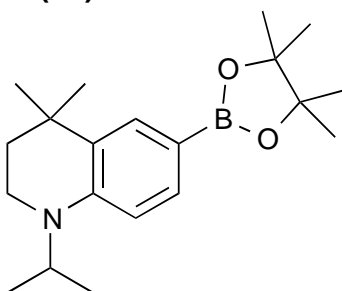

Compound **21** (0.89 g, 2.70 mmol) was dissolved in anhydrous DMSO (12 mL) in a Schlenk flask, and the resultant solution was degassed using the freeze-pump-thaw method, and the flask refilled with Ar. Pd(dppf)Cl<sub>2</sub> (0.099 g, 0.135 mmol), KOAc (0.53 g, 5.39 mmol) and B<sub>2</sub>Pin<sub>2</sub> (0.719 g, 2.83 mmol) were then added under Ar. The resultant mixture was then stirred at 80 °C for 18 h. The mixture was cooled, diluted with EtOAc, washed with H<sub>2</sub>O and brine, dried (MgSO<sub>4</sub>) and evaporated to give a crude solid. This was passed through a short SiO<sub>2</sub> plug (eluting with DCM), evaporated, and then recrystallised from MeOH at –20 °C to give compound **29** as a colourless crystalline solid (0.52 g, 59%): m.p. = 146-147 °C; <sup>1</sup>H NMR (600 MHz, CDCl<sub>3</sub>) δ 1.20 (d, *J* = 6.6 Hz, 6H), 1.30 (s, 6H), 1.32 (s, 12H), 1.66-1.69 (m, 2H), 3.18-3.22 (m, 2H), 4.19 (sept, *J* = 6.6 Hz, 1H), 6.68 (d, *J* = 8.4 Hz, 1H), 7.53 (dd, *J* = 8.4, 1.4 Hz, 1H), 7.63 (d, *J* = 1.2 Hz, 1H); <sup>13</sup>C NMR (151 MHz, CDCl<sub>3</sub>) δ 19.1, 25.0, 30.2, 32.2, 36.8, 37.1, 47.2, 83.2, 110.0, 130.7, 132.5, 134.5, 146.9; <sup>11</sup>B NMR (128 MHz, CDCl<sub>3</sub>) δ 30.81; IR (neat)  $\nu_{\max}/\text{cm}^{-1}$  2967w, 2932w, 2867w, 1601s, 1511w, 1466m, 1405m, 1312s, 1140s, 963m, 804s; MS (ES): *m/z* = 329.2 [M+H]<sup>+</sup>; HRMS (ES) calcd. for C<sub>20</sub>H<sub>33</sub>NBO<sub>2</sub> [M+H]<sup>+</sup>: 329.2641, found: 329.2635; Found: C, 73.51; H, 9.82; N 4.29. Calc. for C<sub>20</sub>H<sub>32</sub>NBO<sub>2</sub>: C, 72.95; H, 9.80; N 4.25%.

Note: The <sup>13</sup>C resonance for the carbon atom bonded to boron was not observed, despite processing with larger line broadening.

**4,4-Dimethyl-1-(propan-2-yl)-6-(tetramethyl-1,3,2-dioxaborolan-2-yl)-1,4-dihydroquinoline (30)**

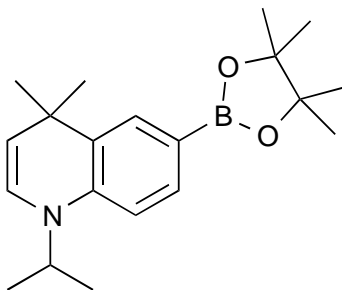

Compound **22** (0.53 g, 1.62 mmol) was dissolved in anhydrous DMSO (10 mL) in a Schlenk flask, and the resultant solution was degassed using the freeze-pump-thaw method, and the flask refilled with Ar. Pd(dppf)Cl<sub>2</sub> (0.059 g, 0.0812 mmol), KOAc (0.319 g, 3.25 mmol) and B<sub>2</sub>Pin<sub>2</sub> (0.455 g, 1.79 mmol) were then added under Ar. The resultant mixture was then stirred at 80 °C for 18 h. The mixture was cooled, diluted with EtOAc, washed with H<sub>2</sub>O and brine, dried (MgSO<sub>4</sub>) and evaporated to give a crude residue. This was passed through a short SiO<sub>2</sub> plug (eluting with DCM), evaporated, and then recrystallised from MeOH at -20 °C to give **30** as a colourless crystalline solid (0.27 g, 53%); m.p. = 119-120 °C; <sup>1</sup>H NMR (700 MHz; CDCl<sub>3</sub>) δ 1.28 (d, *J* = 6.6 Hz, 6H) 1.34 (s, 18H), 4.24 (sept, *J* = 6.7 Hz, 1H), 4.58(d, *J* = 7.9 Hz, 1H), 6.16 (d, *J* = 7.9 Hz, 1H), 6.80 (d, *J* = 8.6 Hz, 1H), 7.59 (dd, *J* = 8.3, 1.5 Hz, 1H), 7.70 (d, *J* = 1.5 Hz, 1H); <sup>13</sup>C NMR (176 MHz; CDCl<sub>3</sub>) δ 20.9, 25.1, 33.0, 33.3, 46.8, 83.2, 83.4, 110.3, 110.8, 122.5, 130.9, 133.3, 133.8, 142.4; <sup>11</sup>B NMR (128 MHz, CDCl<sub>3</sub>) δ 30.74; IR (neat)  $\nu_{\max}/\text{cm}^{-1}$  2994w, 2974w, 1663w, 1601m, 1496w, 1397m, 1206m, 809m; MS (ES): *m/z* = 327.2 [M+H]<sup>+</sup>; HRMS (ES) calcd. for C<sub>20</sub>H<sub>31</sub>NBO<sub>2</sub> [M+H]<sup>+</sup>: 327.2484, found: 327.2480; Found: C, 73.47; H, 9.23; N 4.11. Calc. for C<sub>20</sub>H<sub>30</sub>NBO<sub>2</sub>: C, 73.40; H, 9.24; N 4.28%.

#### 4. $^1\text{H}$ , $^{13}\text{C}$ and $^{11}\text{B}$ NMR spectra 2-Methyl-N-(propan-2-yl)aniline (6)

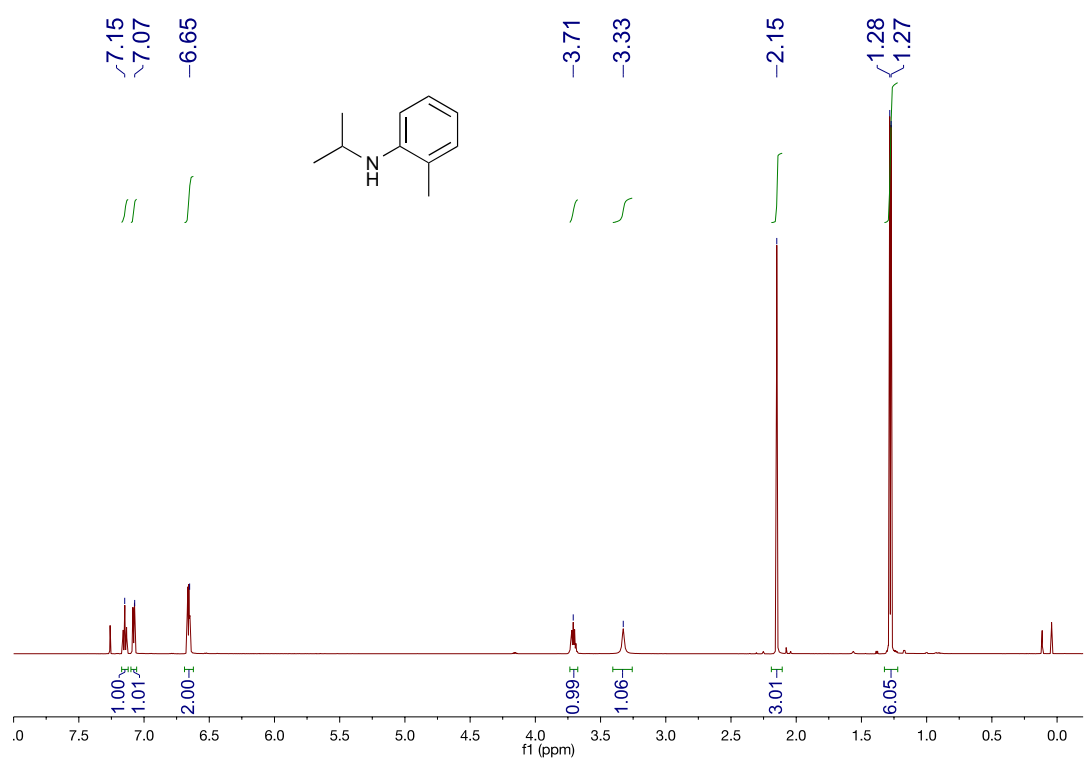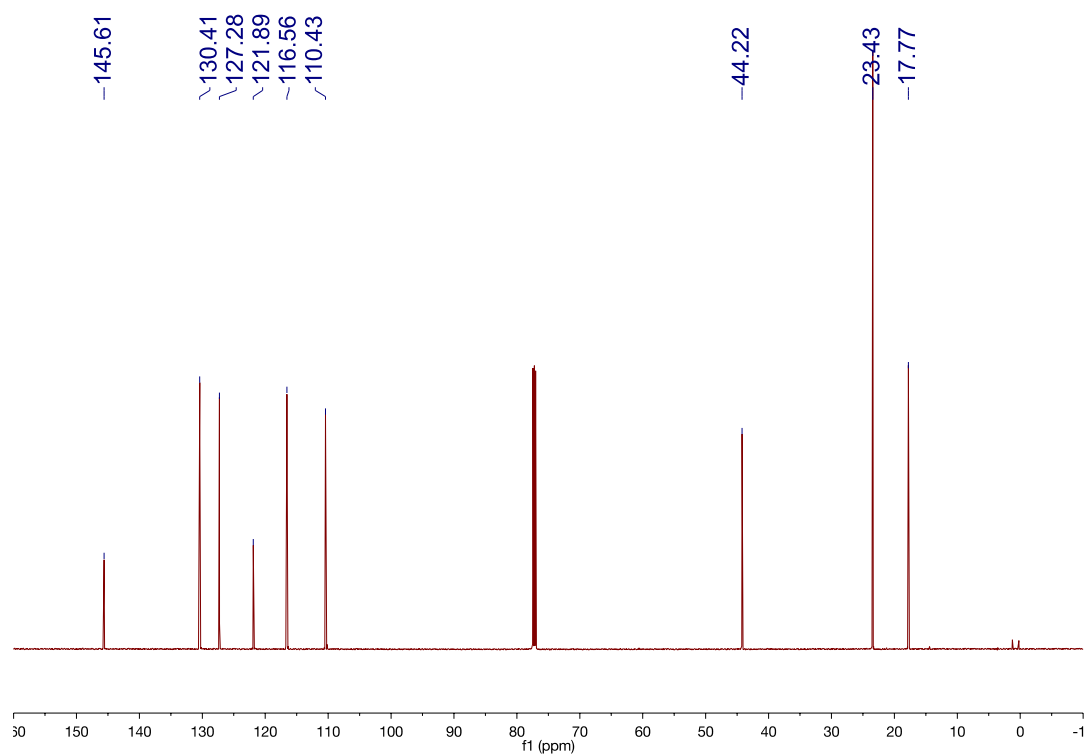

# 2-Methyl-N-(3-methylbut-2-en-1-yl)-N-(propan-2-yl)aniline (4)

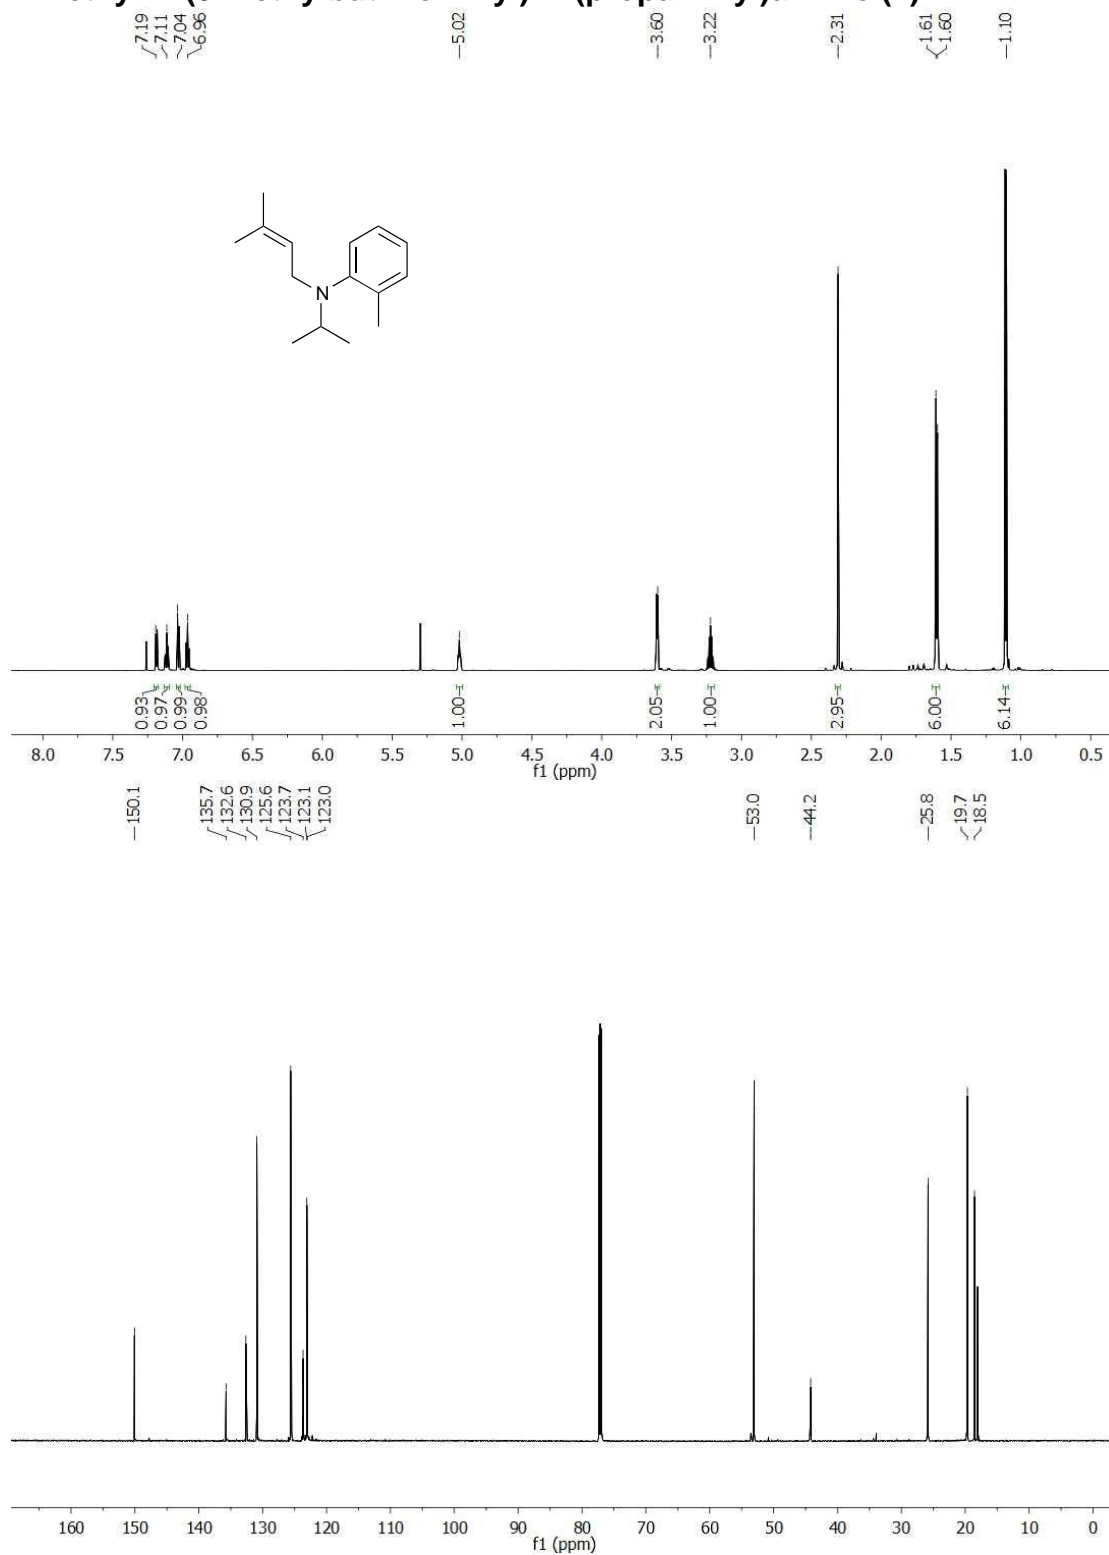

# 1-Isopropyl-4,4,8-trimethyl-1,2,3,4-tetrahydroquinoline (3)

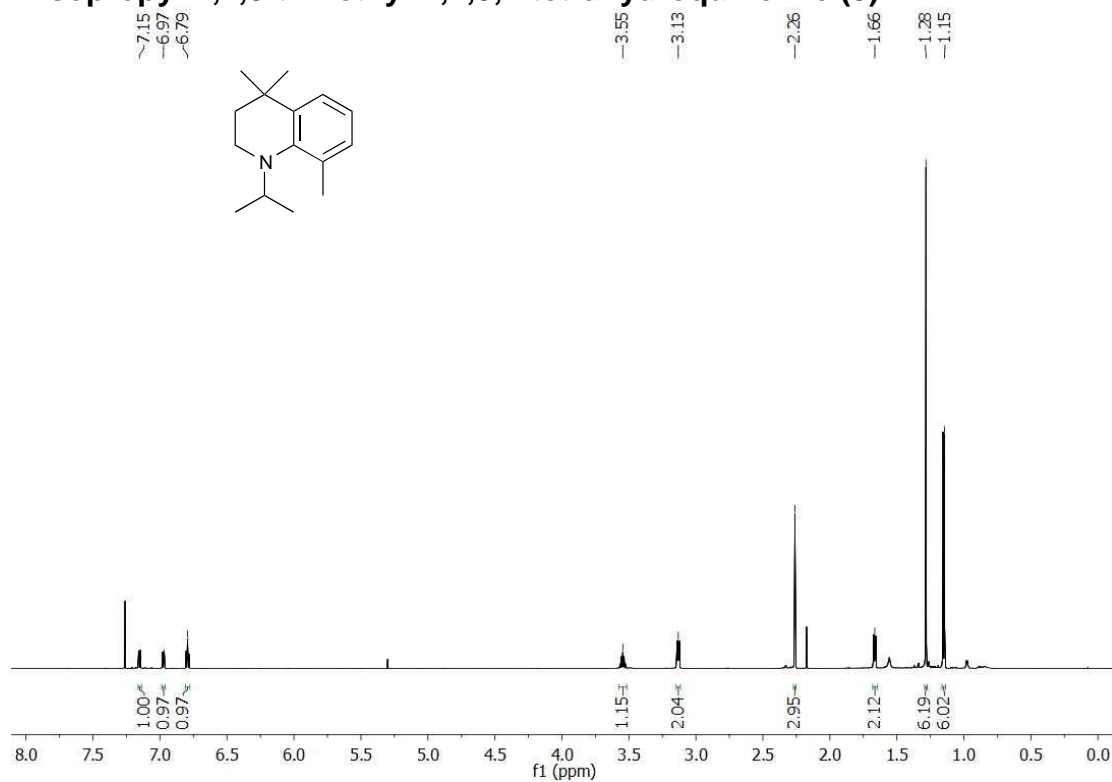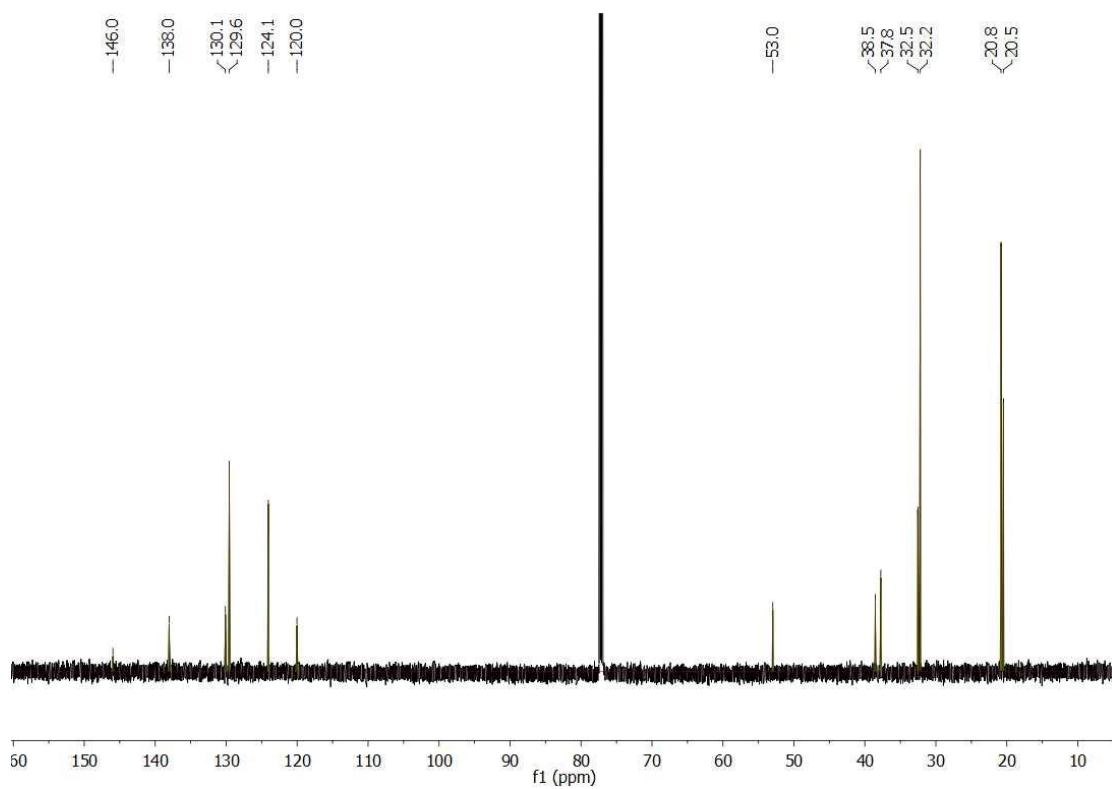

# 6-Bromo-4,4,8-trimethyl-1-(propan-2-yl)-1,2,3,4-tetrahydroquinoline (7)

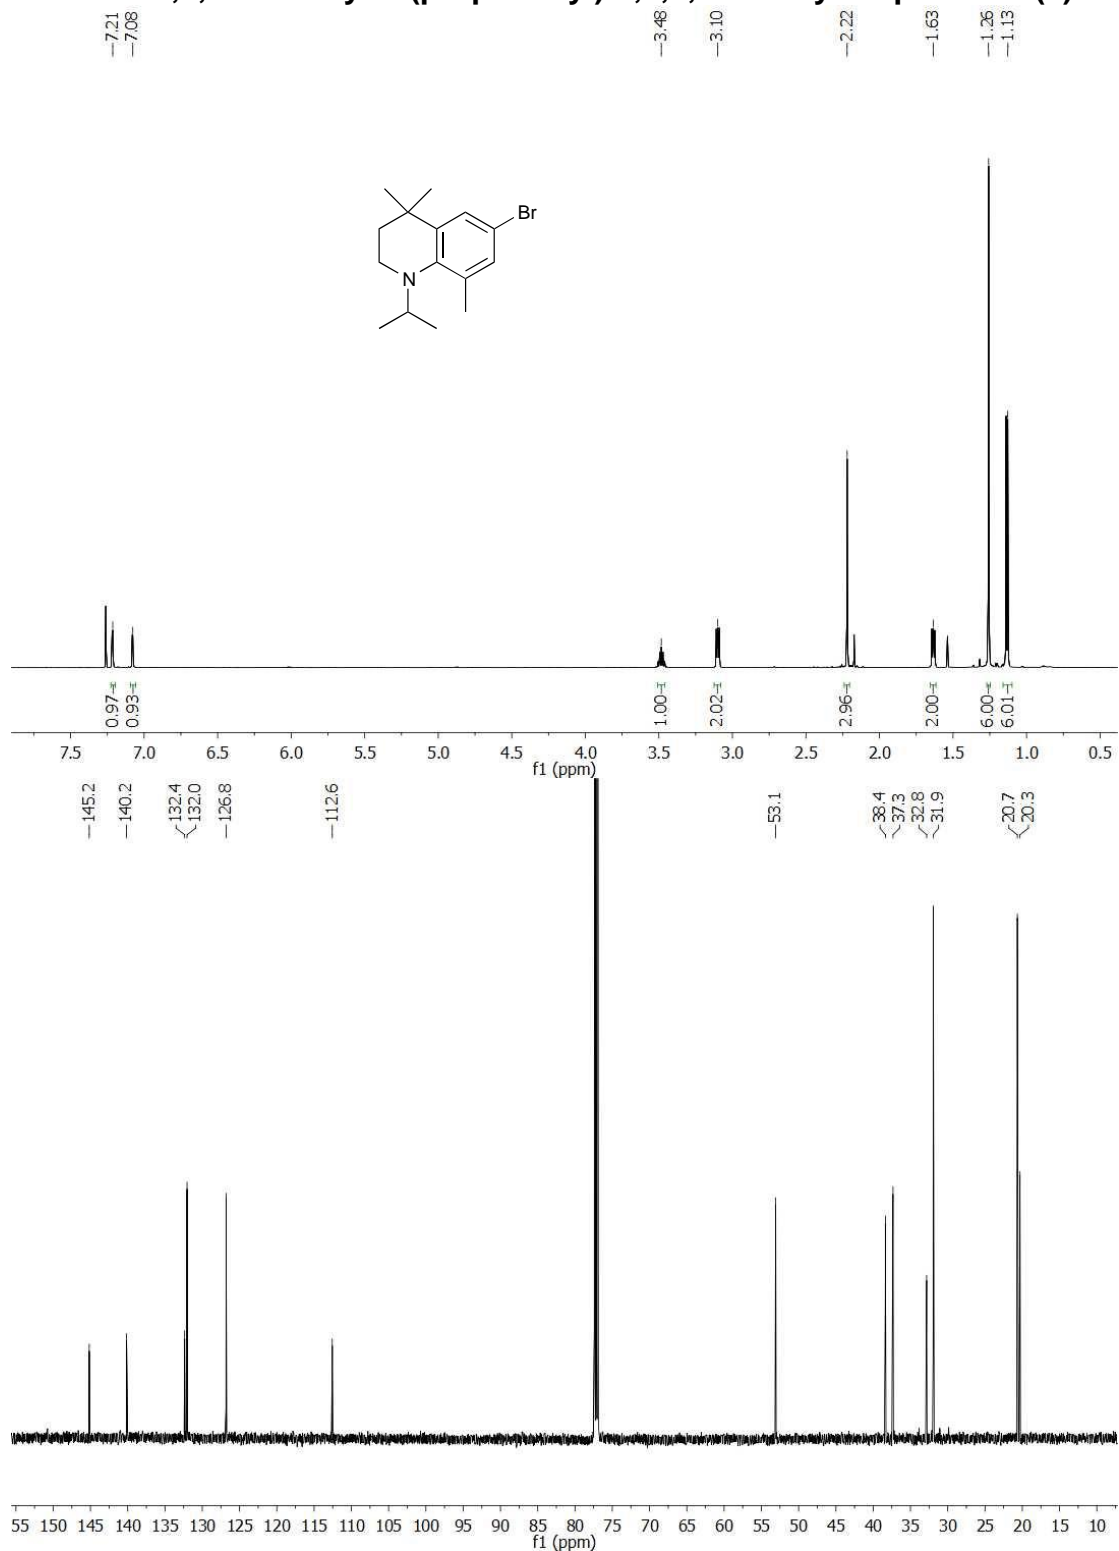



# 4-[(2-Methylphenyl)amino]butan-2-one (8)

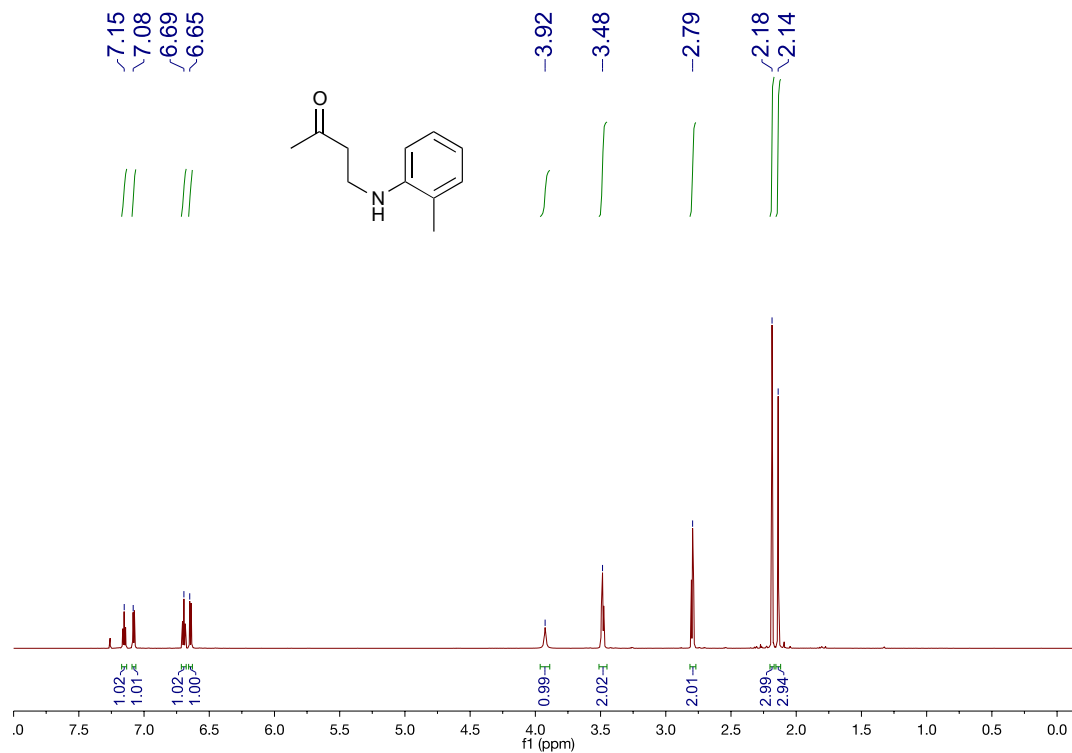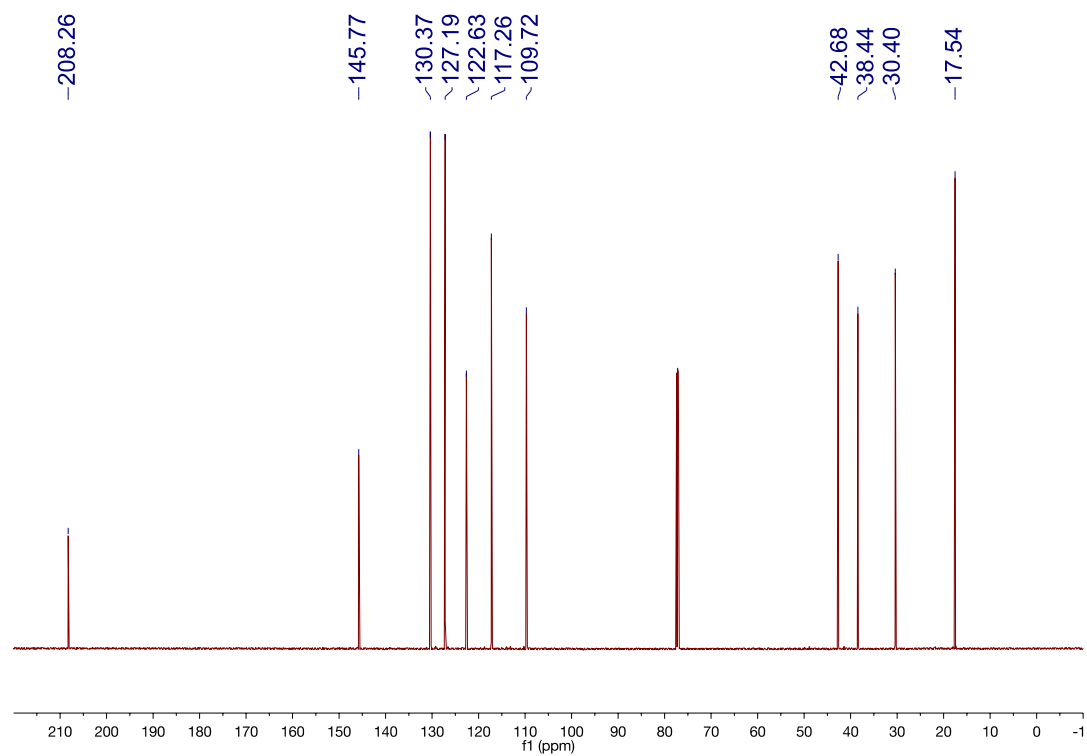

# 4,4,8-trimethyl-1,2,3,4-tetrahydroquinoline (10)

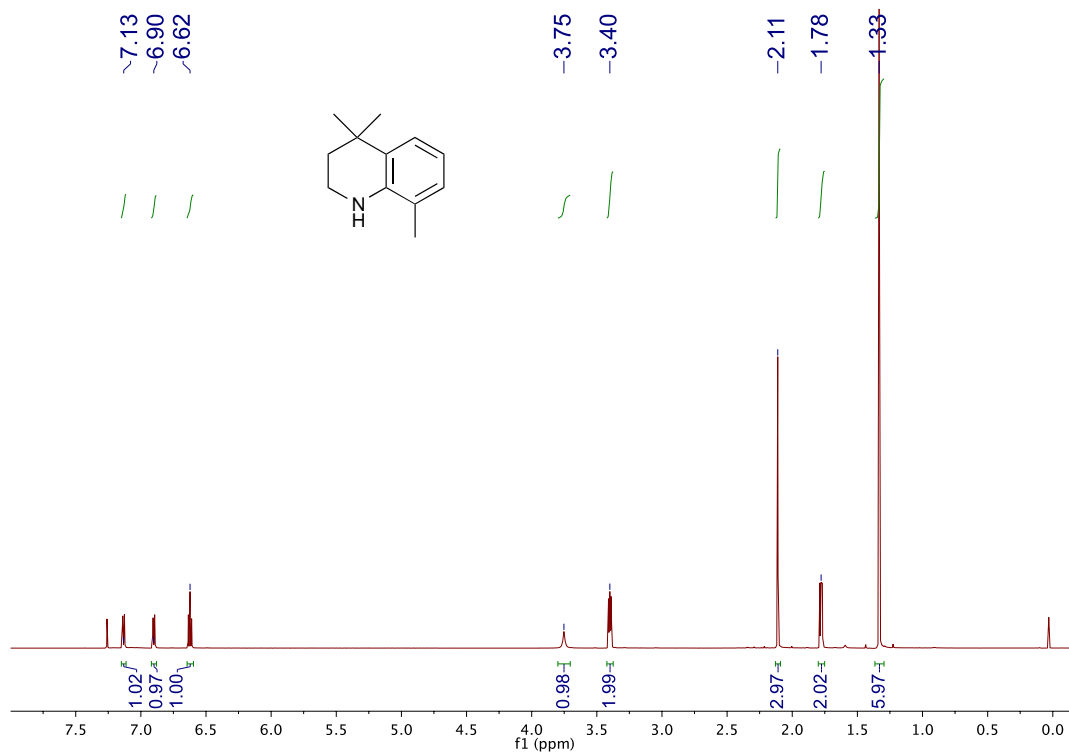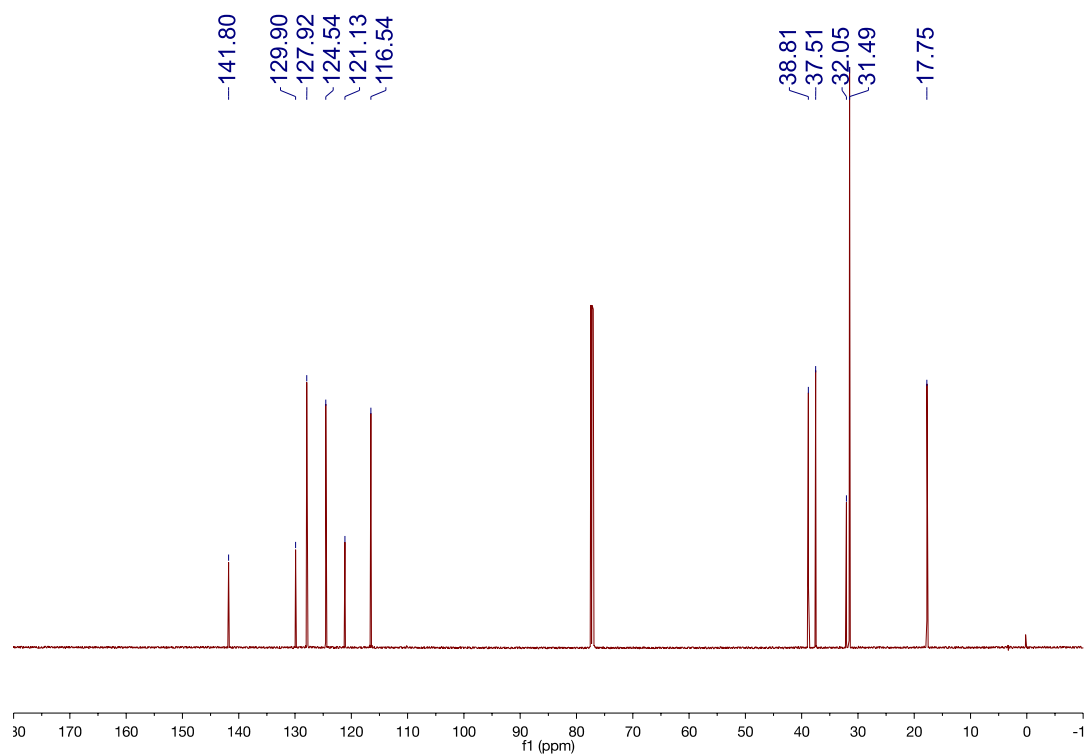

# ***N*-(4-iodo-2-methylphenyl)-3-methylbut-2-enamide (12)**

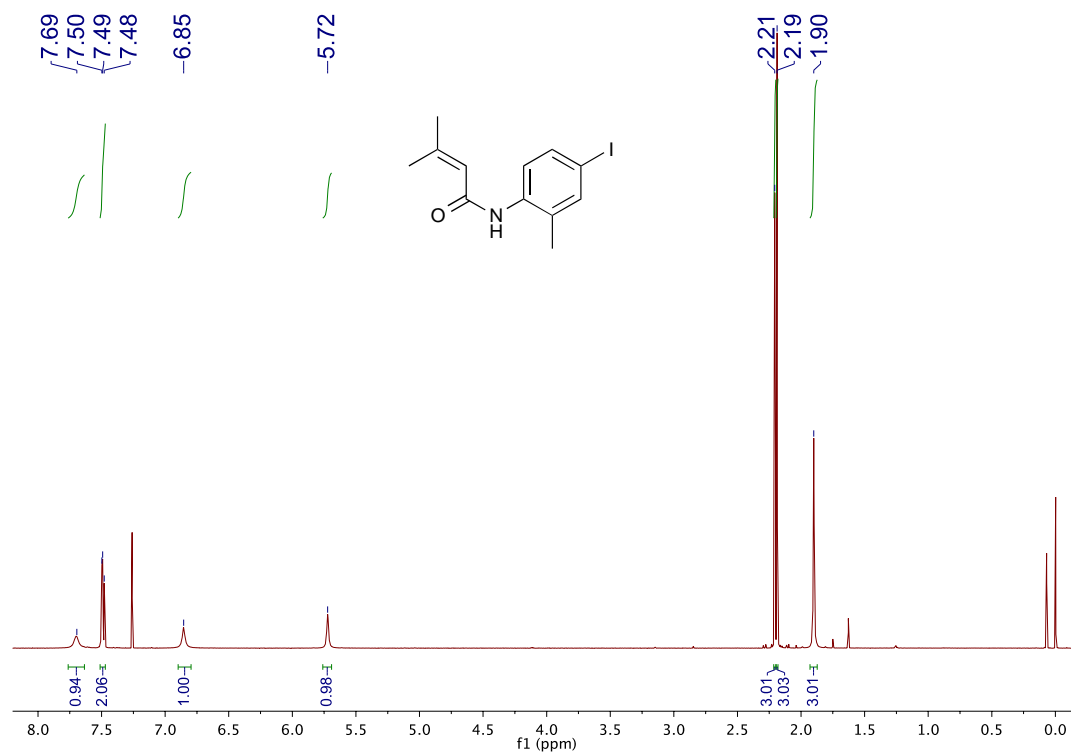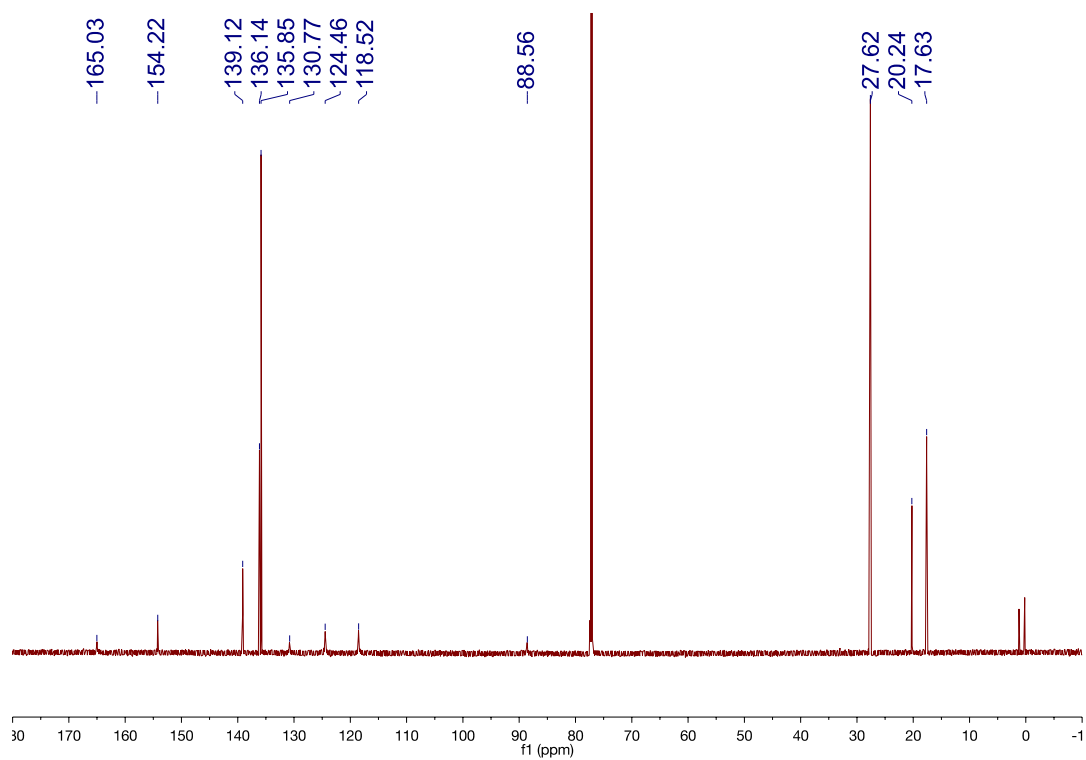

# 6-Iodo-4,4,8-trimethyl-1,2,3,4-tetrahydroquinolin-2-one (13)

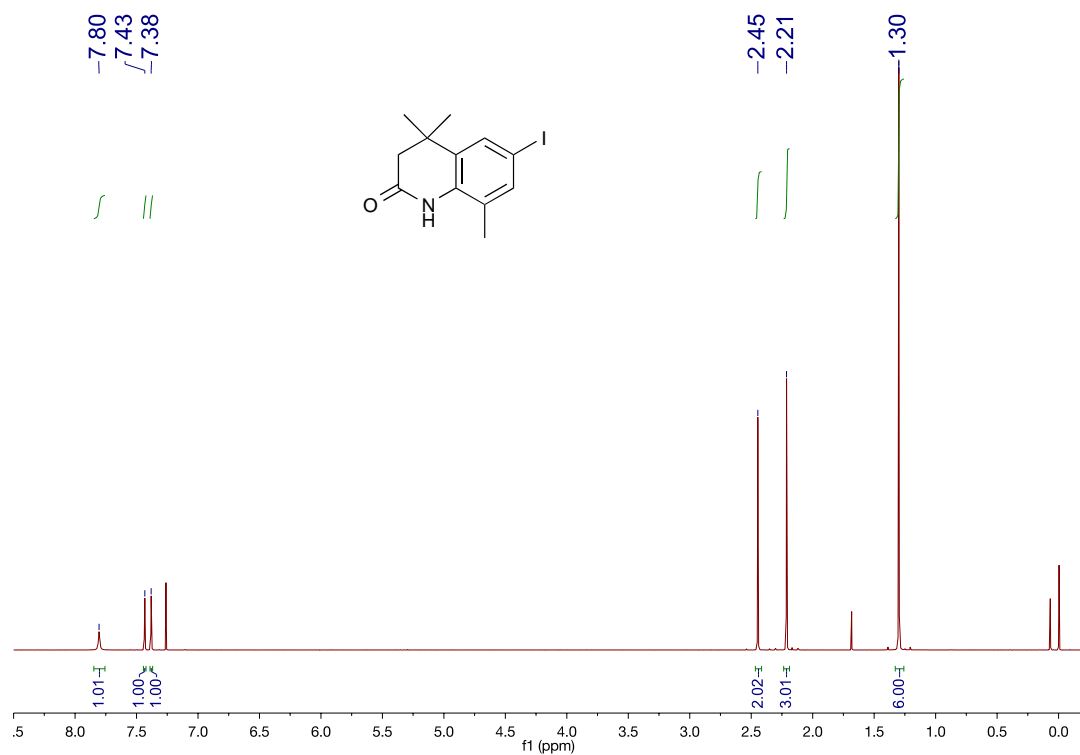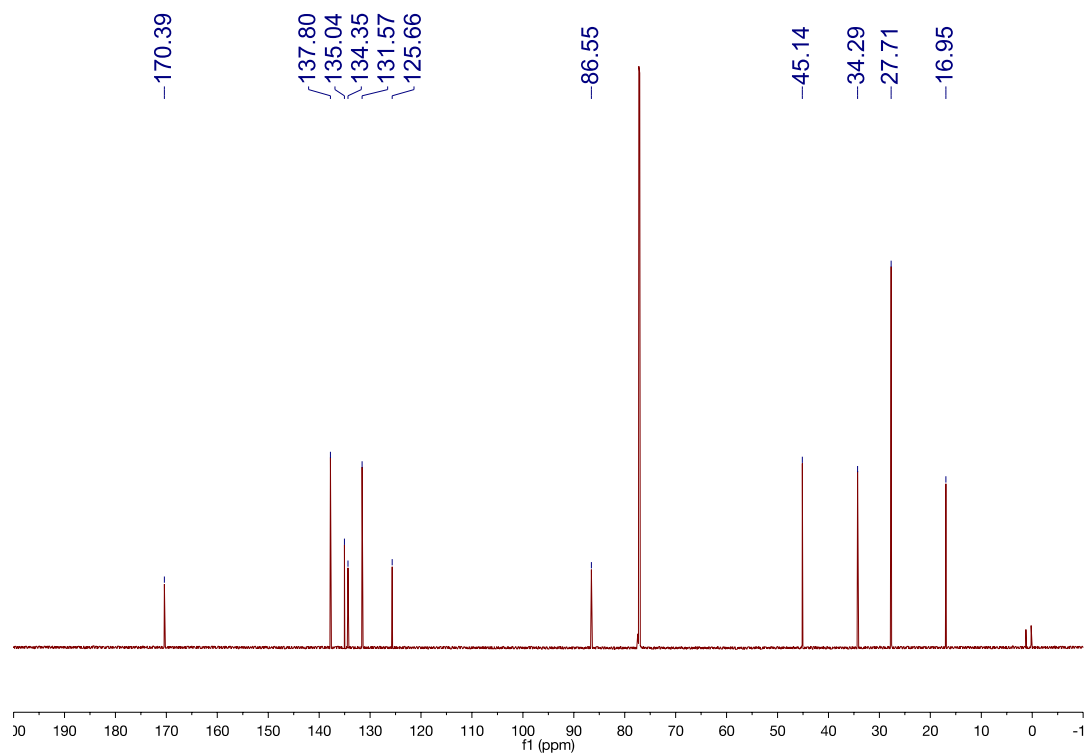

# 6-Iodo-4,4,8-trimethyl-1,2,3,4-tetrahydroquinoline (14)

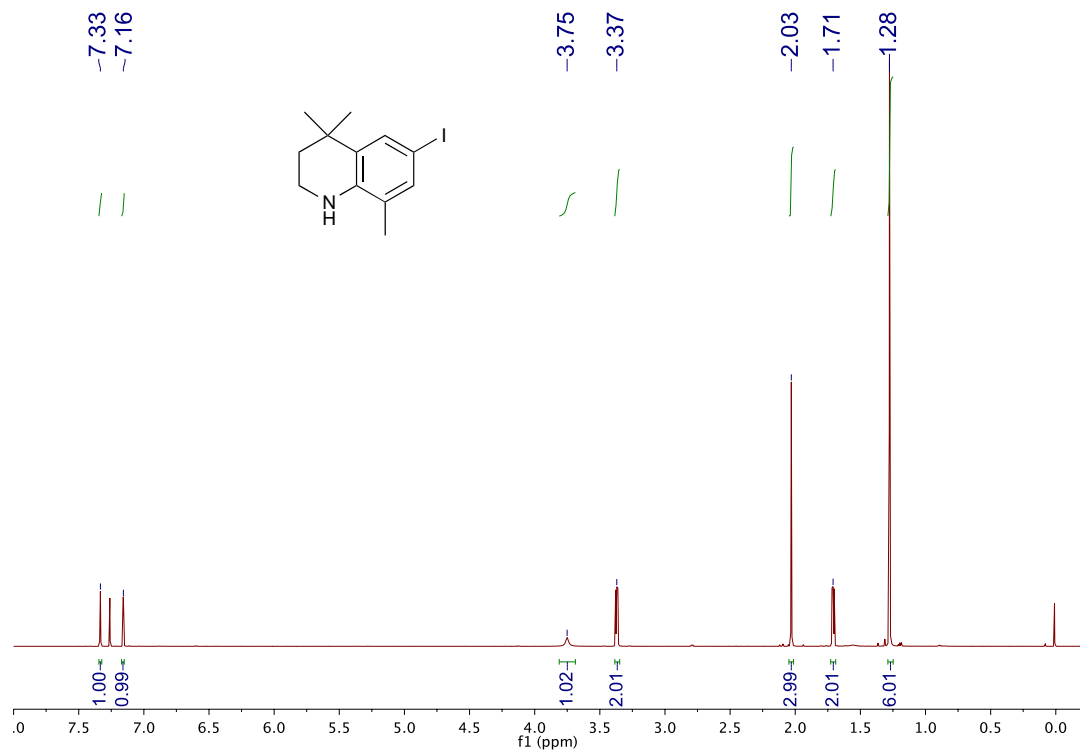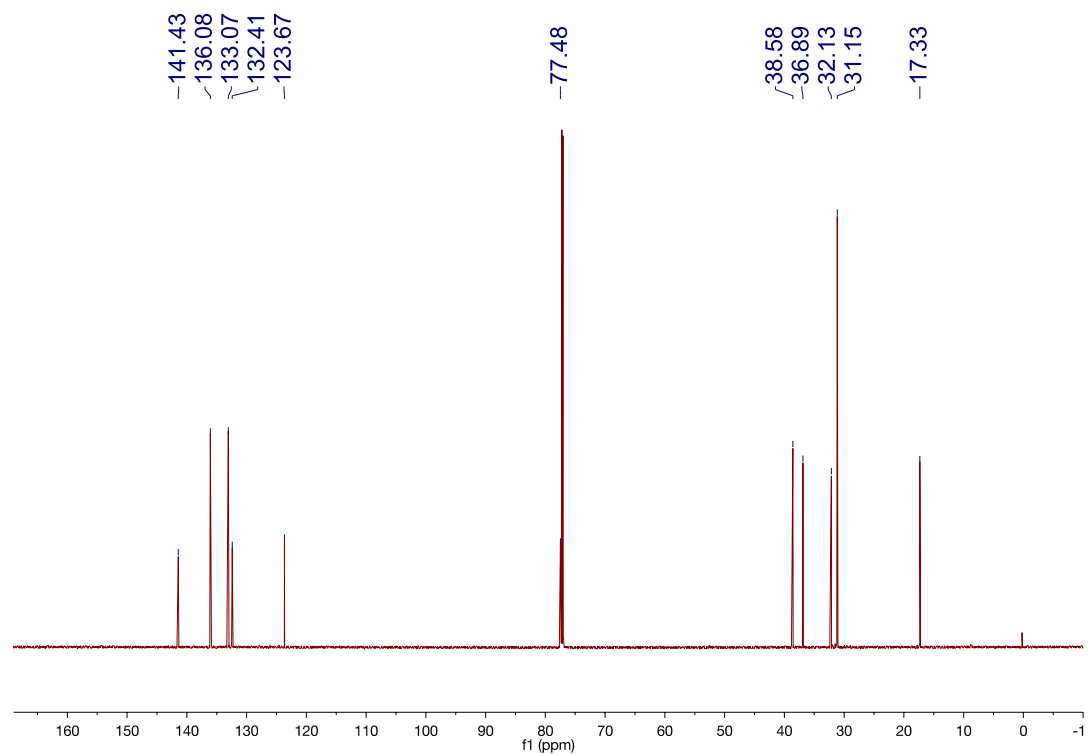

# 6-Iodo-4,4,8-trimethyl-2-(propan-2-yloxy)-3,4-dihydroquinoline (15b)

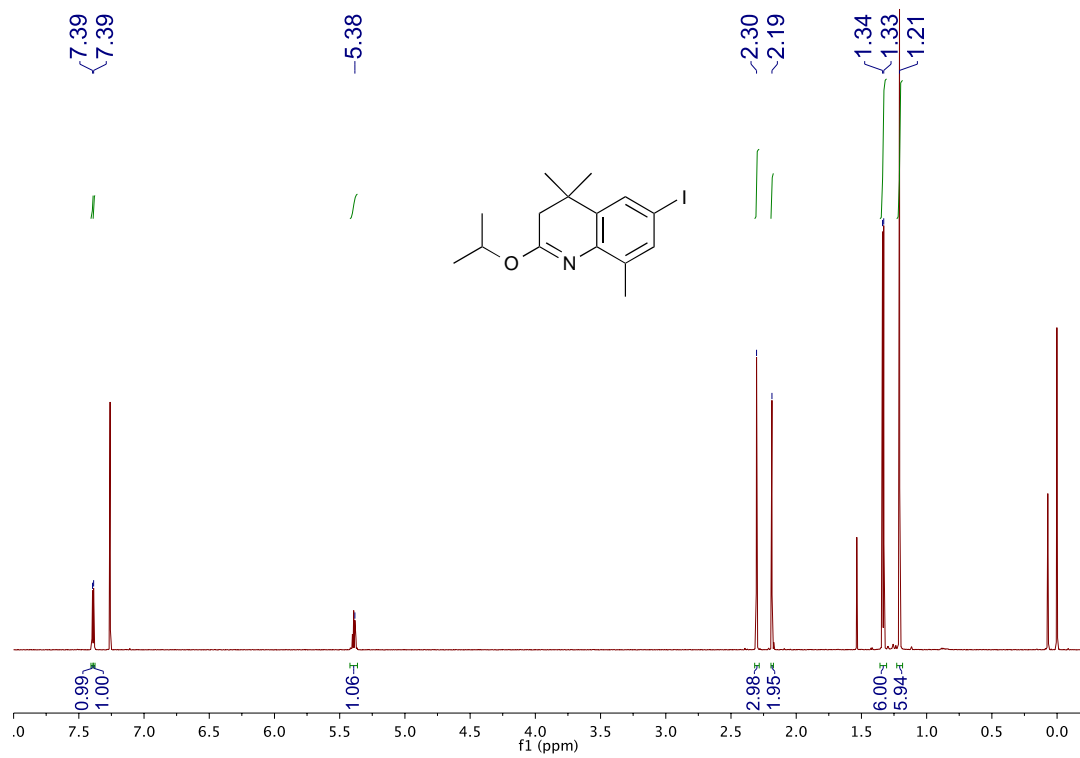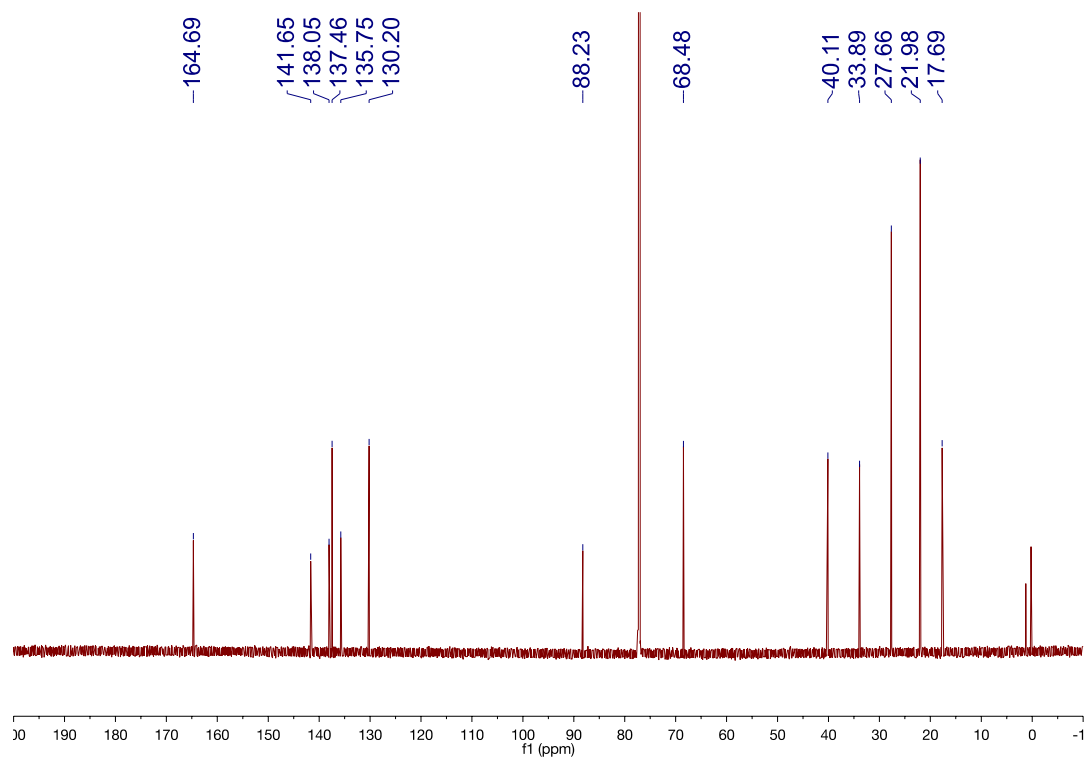

# 6-Iodo-1,4,4,8-tetramethyl-1,2,3,4-tetrahydroquinoline (16)

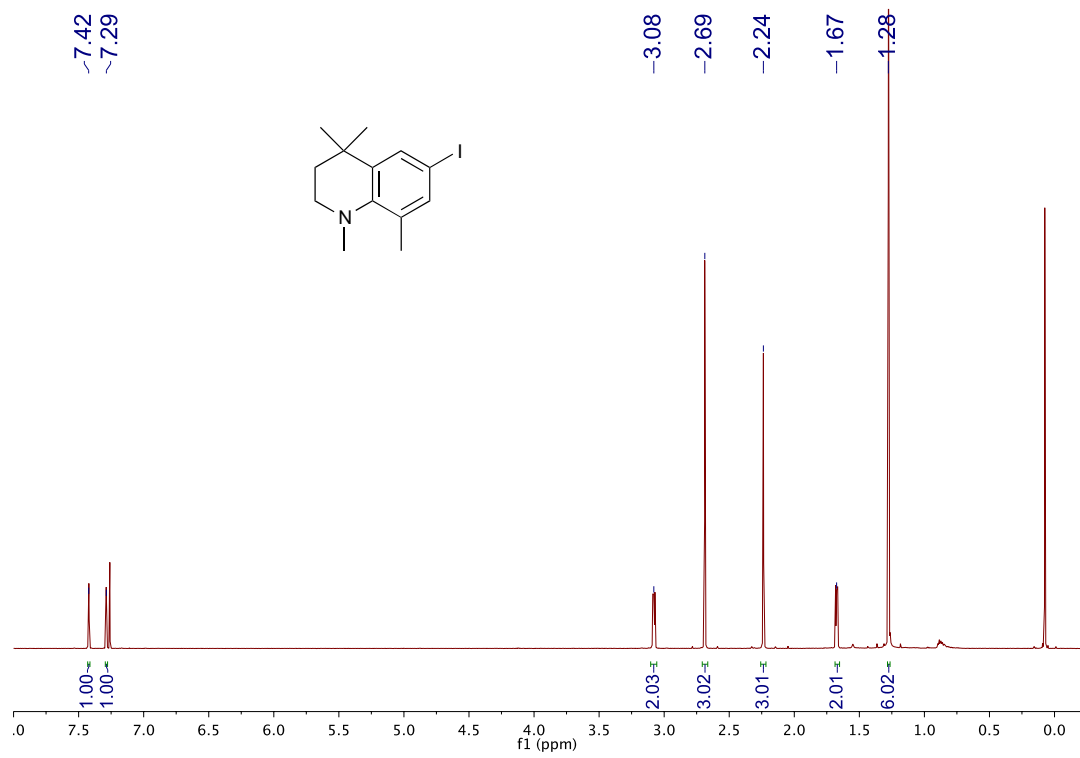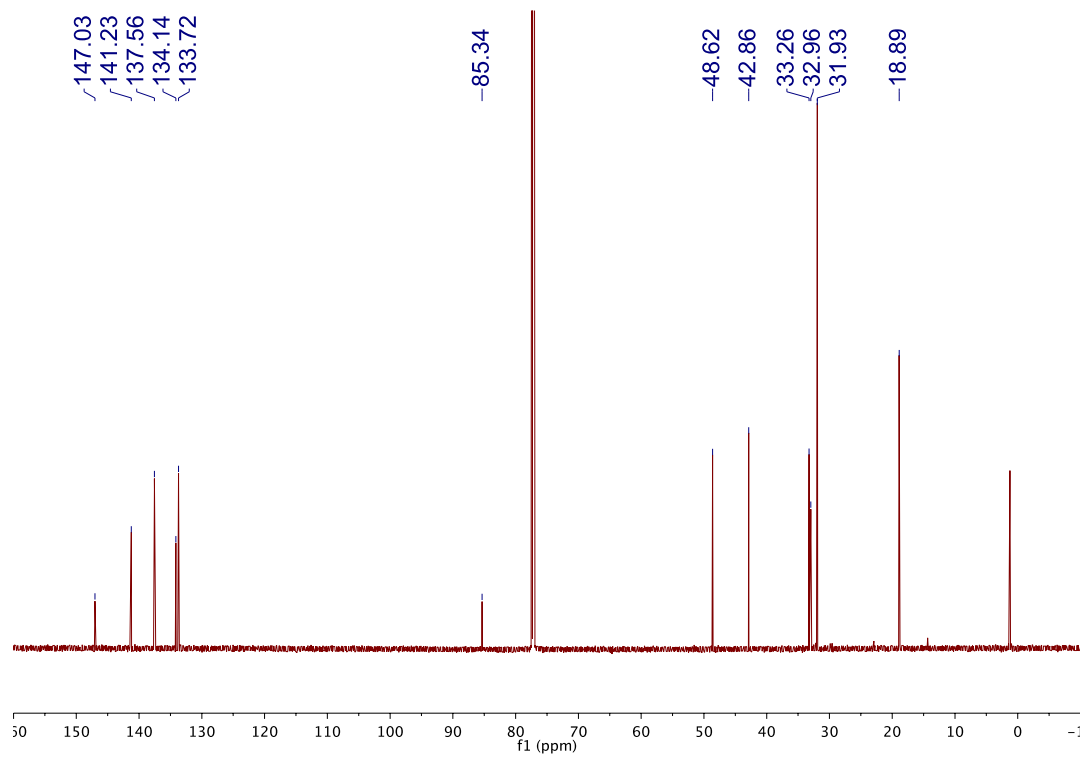

# N-(4-Iodophenyl)-3-methylbut-2-enamide (18)

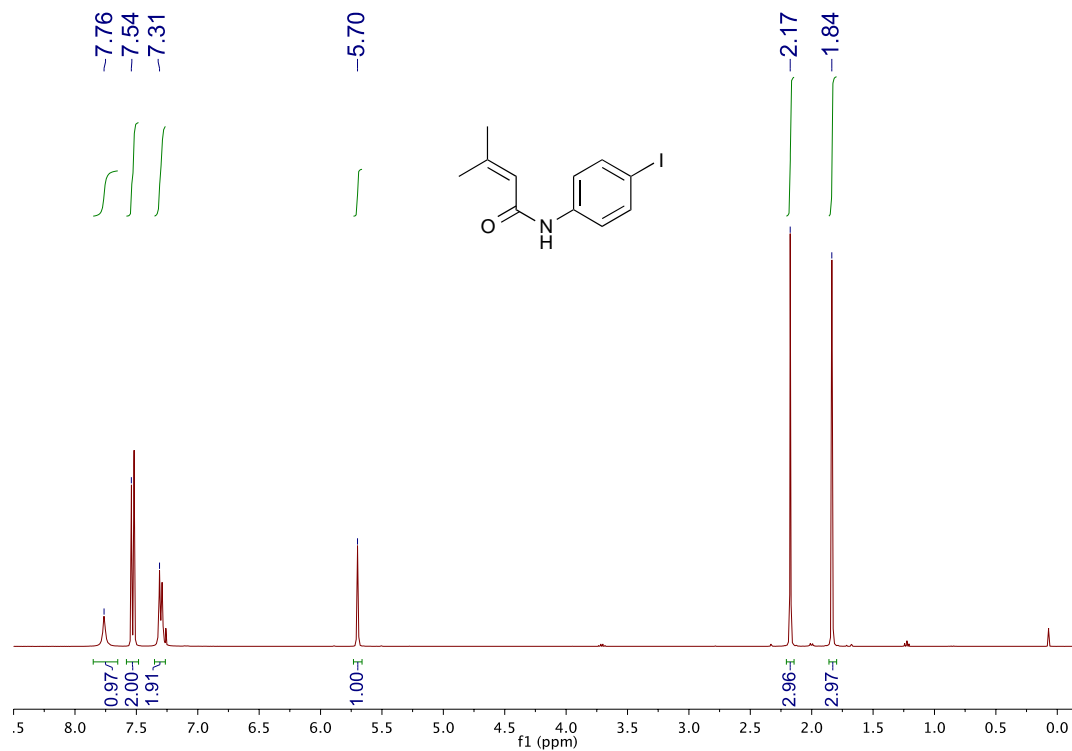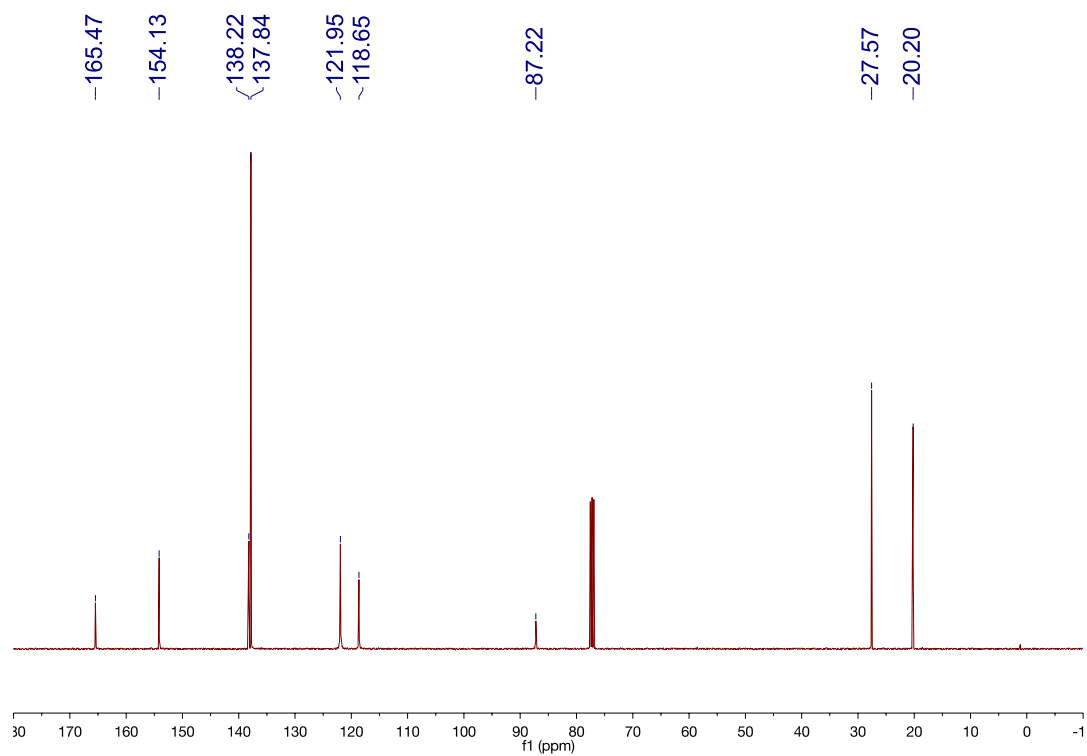



# 6-Iodo-4,4-dimethyl-1,2,3,4-tetrahydroquinolin-2-one (19)

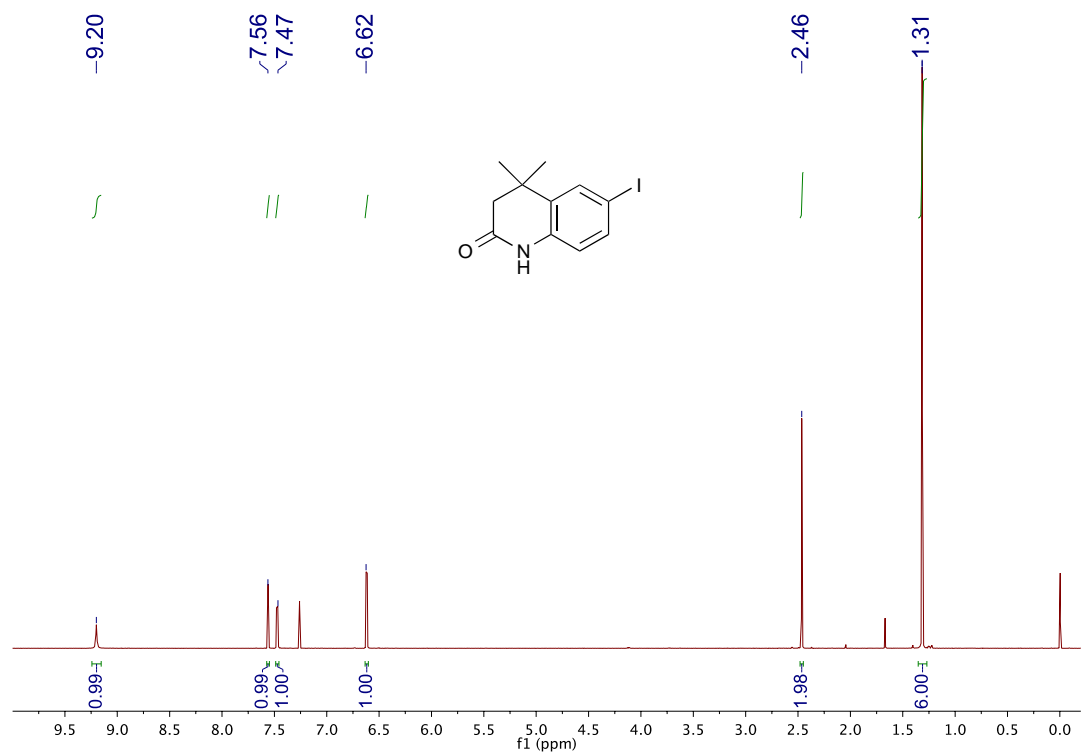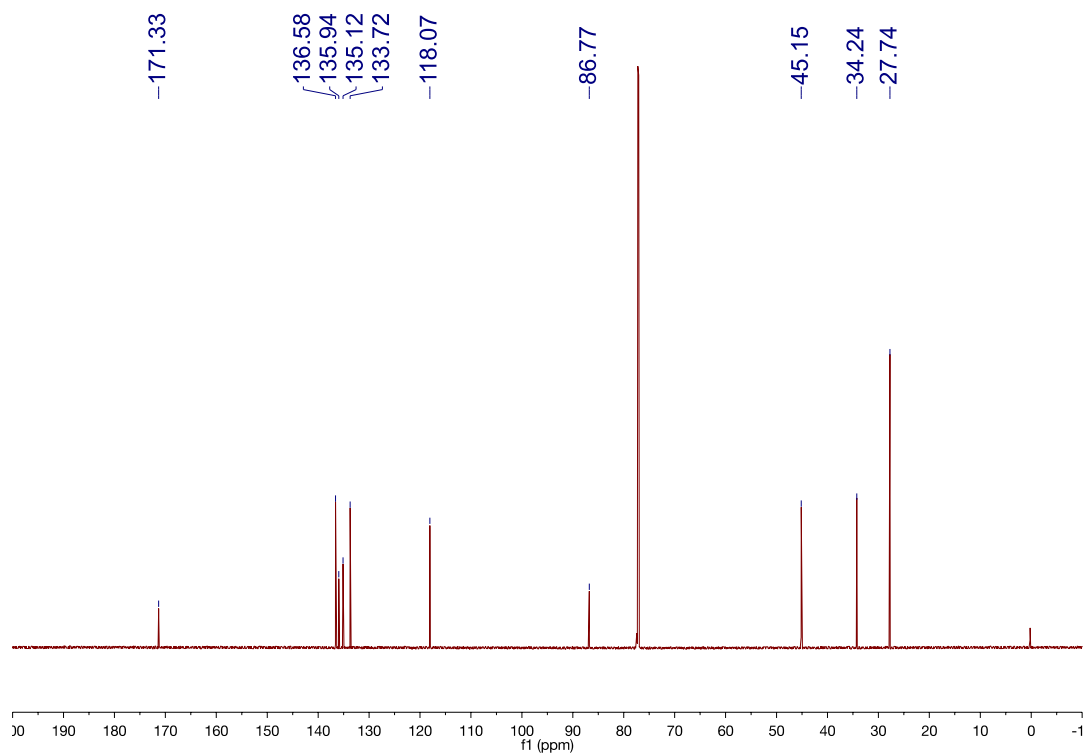

**6-Iodo-4,4-dimethyl-1-(propan-2-yl)-1,2,3,4-tetrahydroquinolin-2-one (20a)**

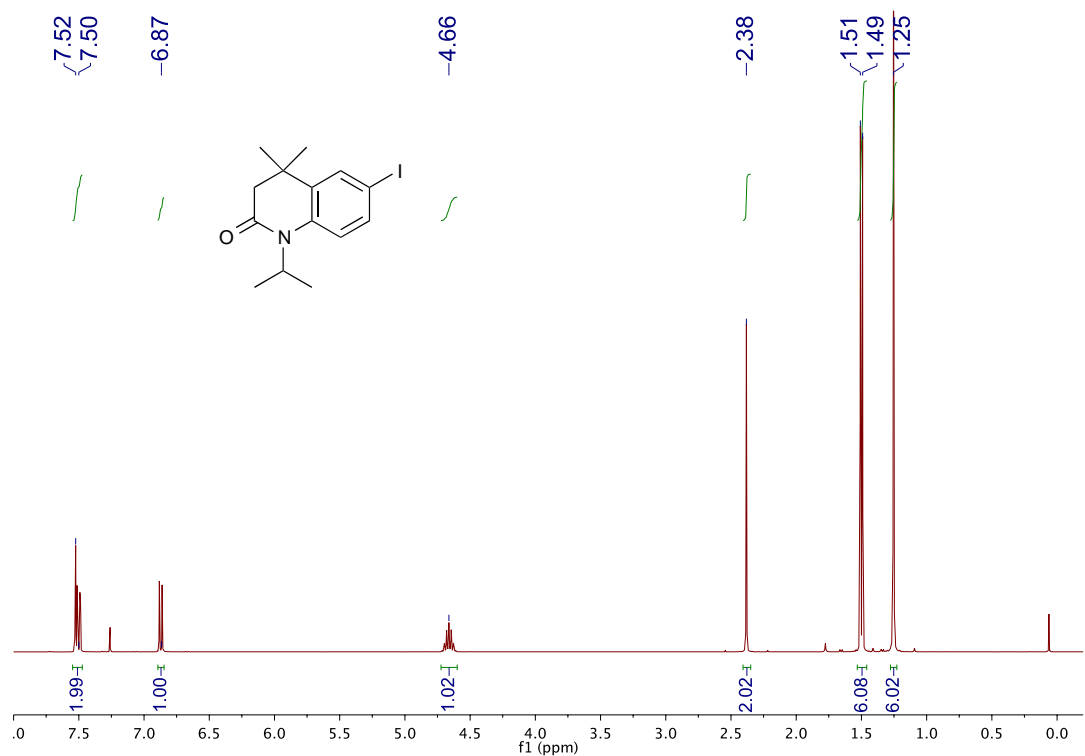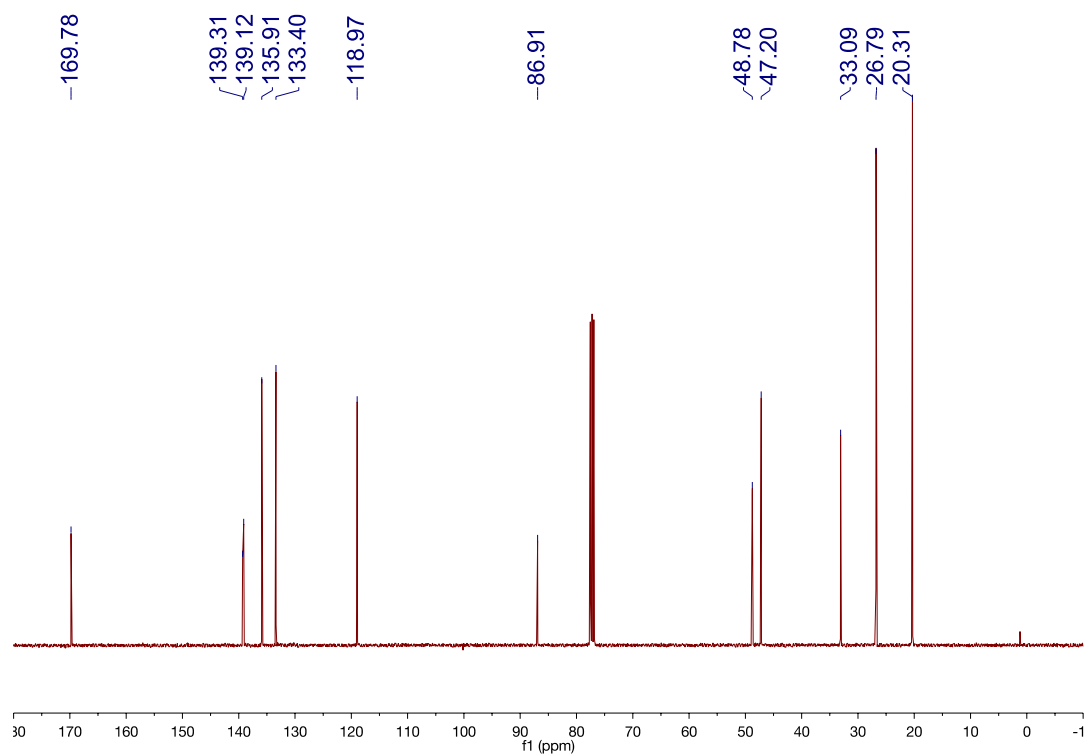

# 6-Iodo-4,4-dimethyl-2-(propan-2-yloxy)-3,4-dihydroquinoline (20b)

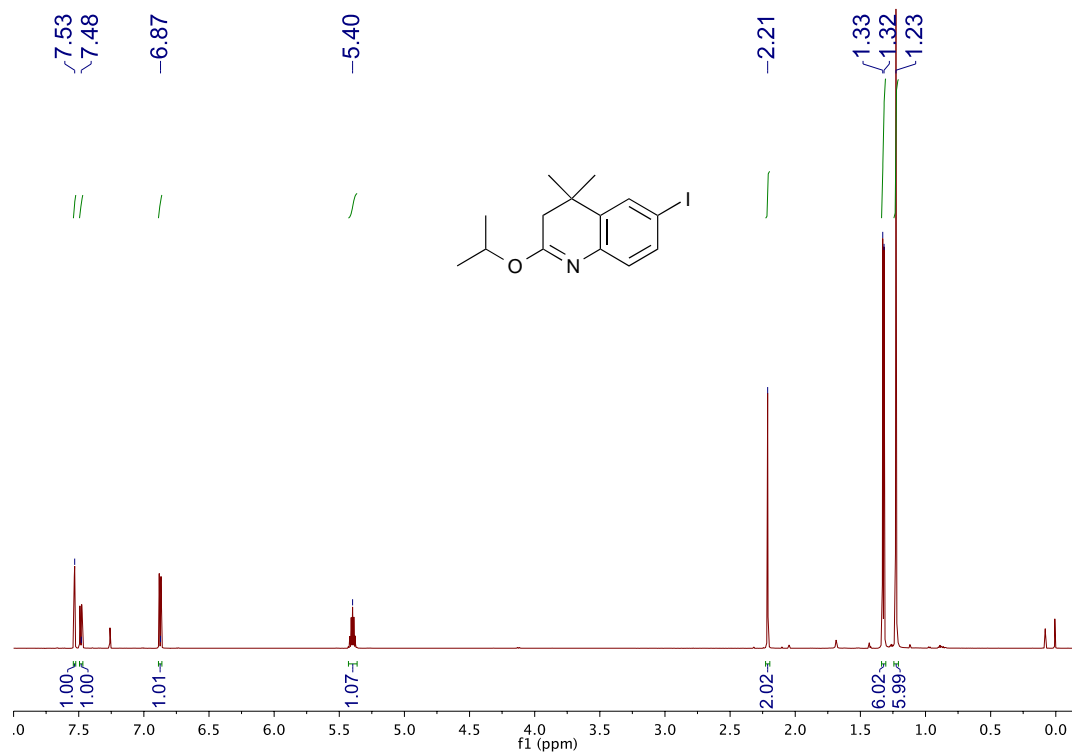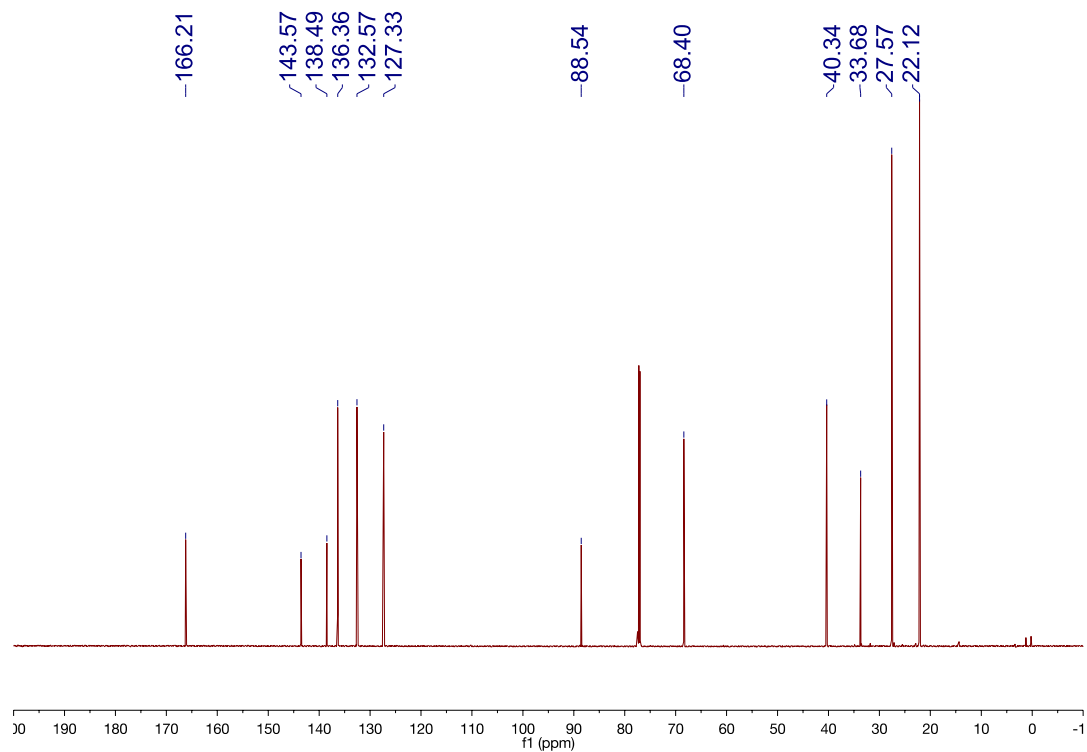

# 6-Iodo-4,4-dimethyl-1-(propan-2-yl)-1,2,3,4-tetrahydroquinoline (21)

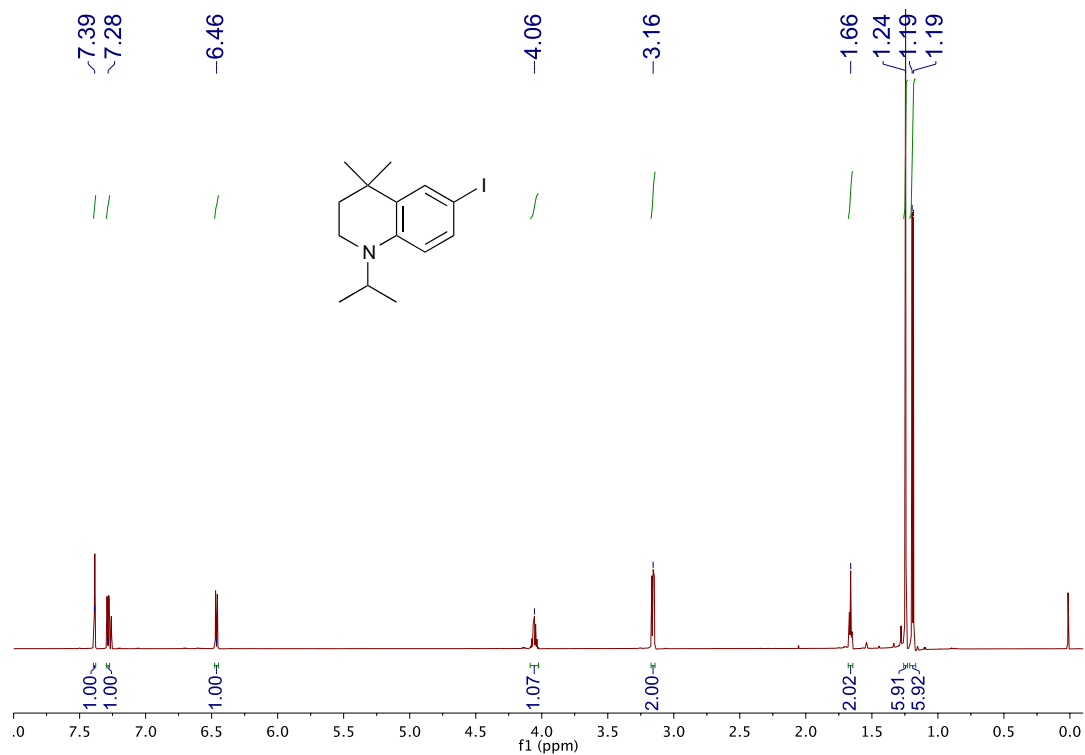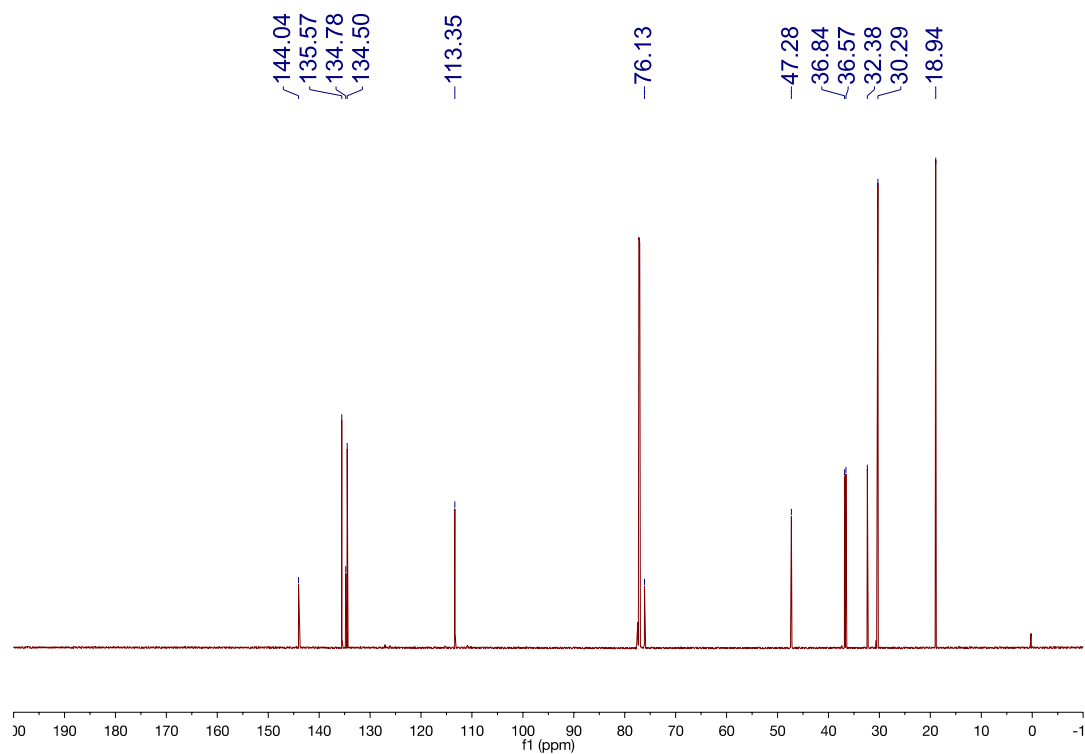

# 6-Iodo-4,4-dimethyl-1-(propan-2-yl)-1,4-dihydroquinoline (22)

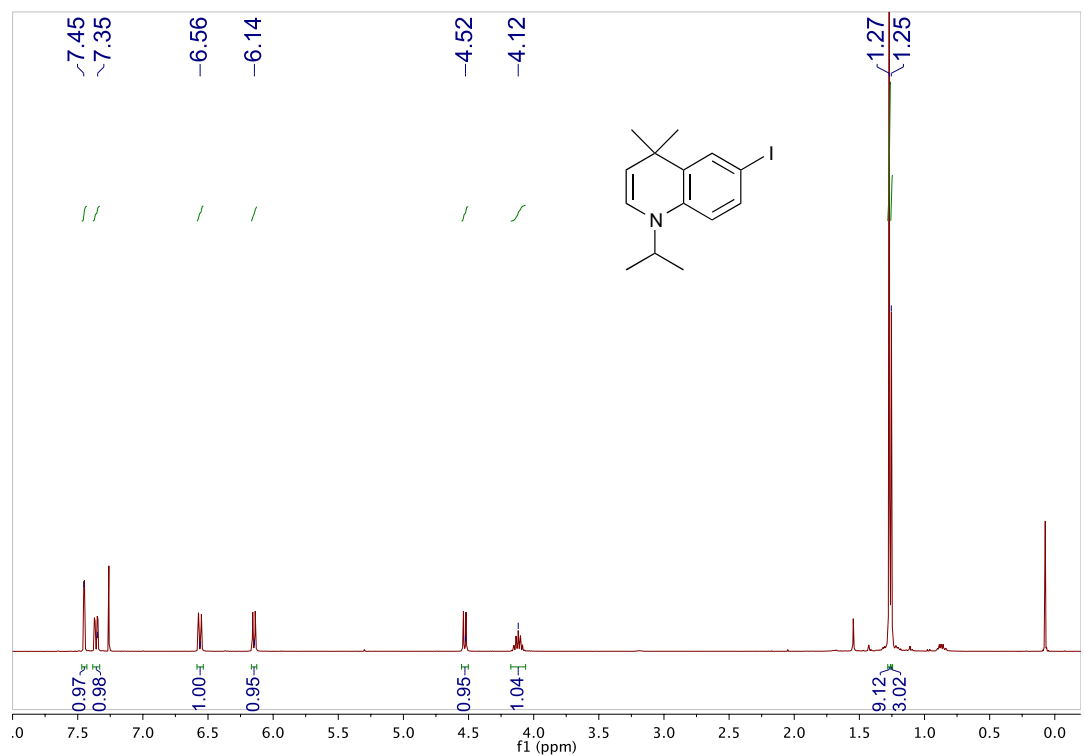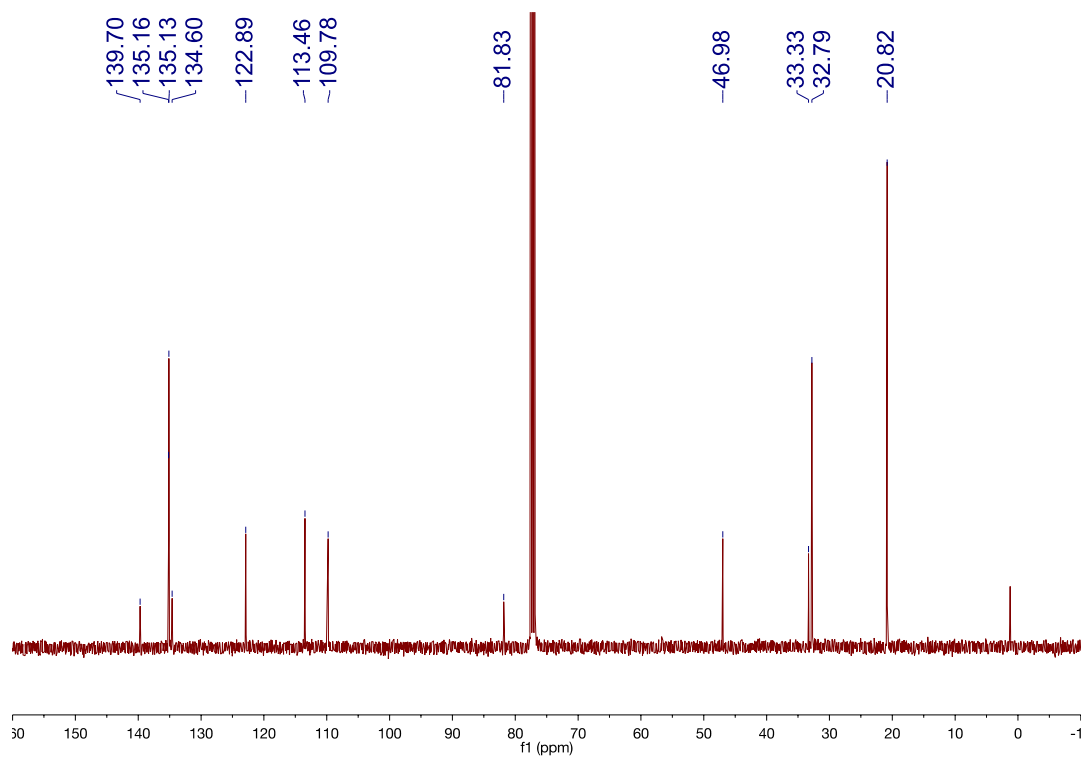

# 4-Phenyl-1,2,3,4-tetrahydroquinolin-2-one (23a)

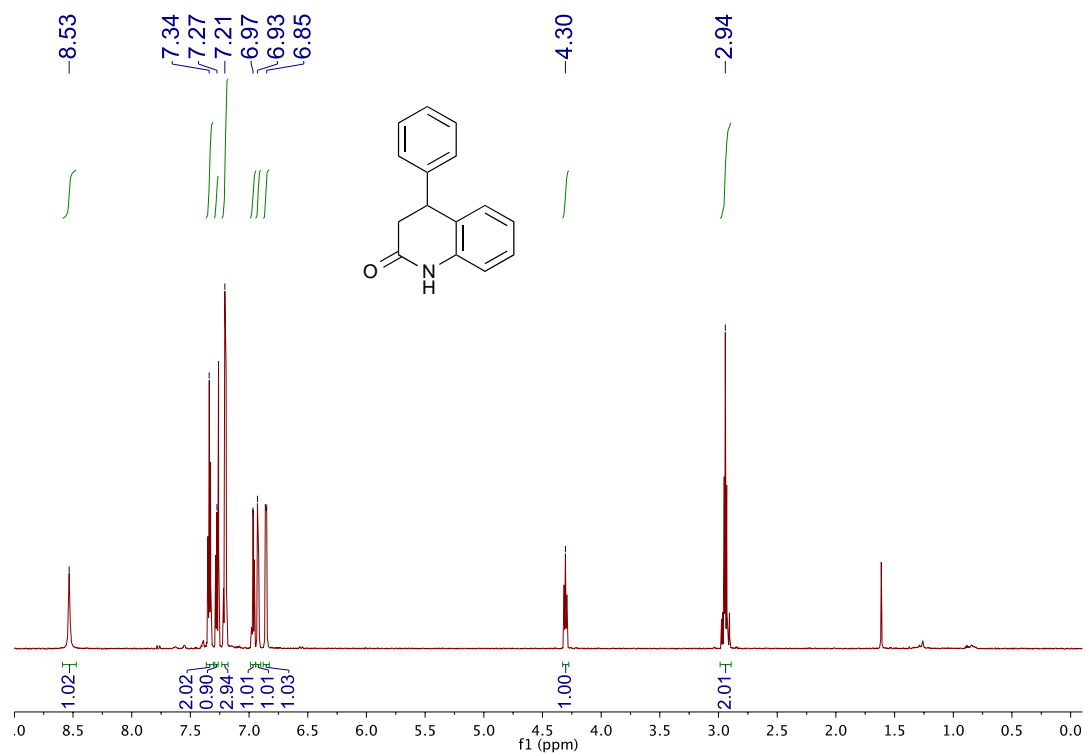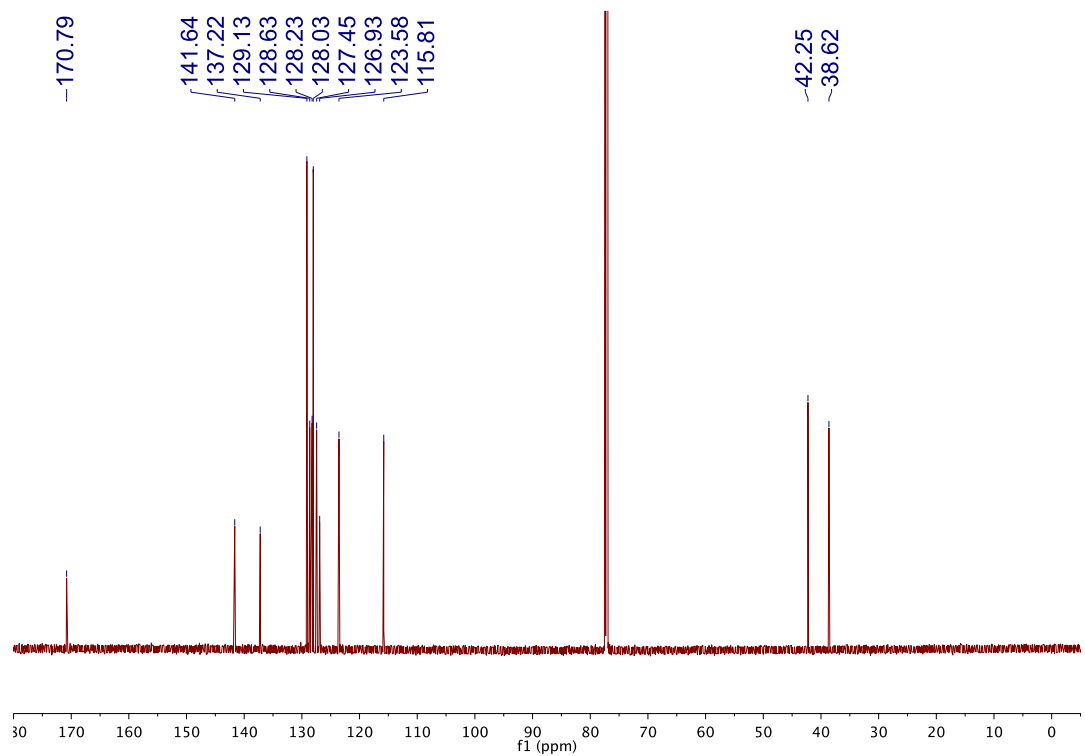

# 1-Methyl-4-phenyl-1,2,3,4-tetrahydroquinolin-2-one (23b)

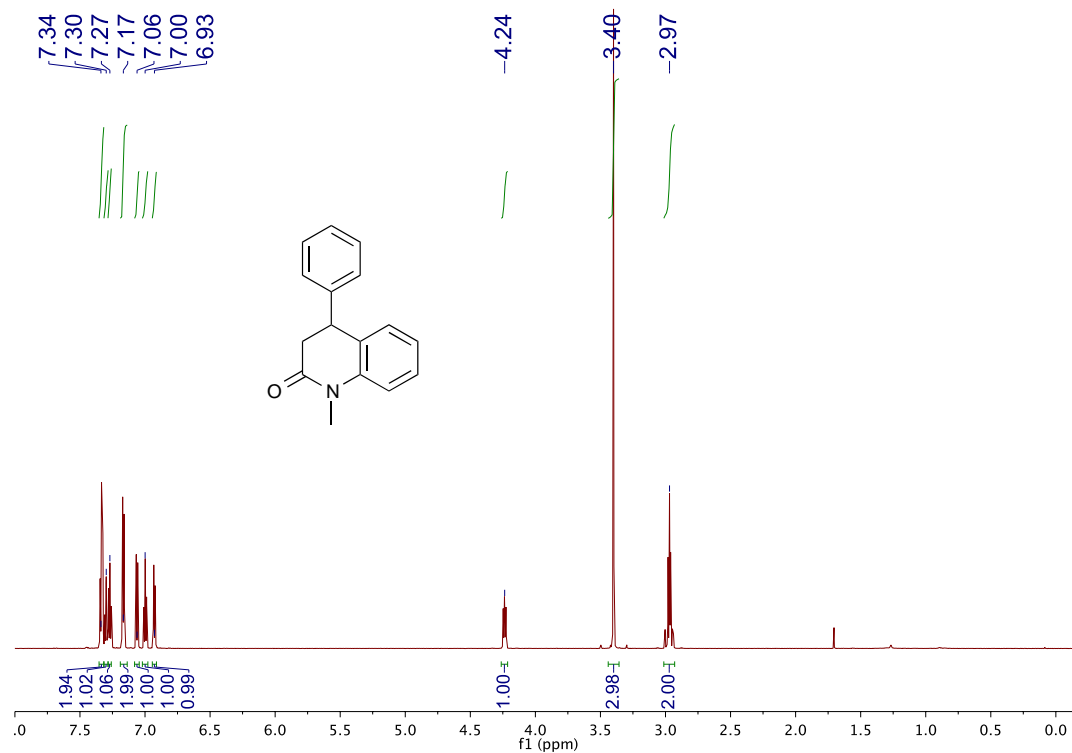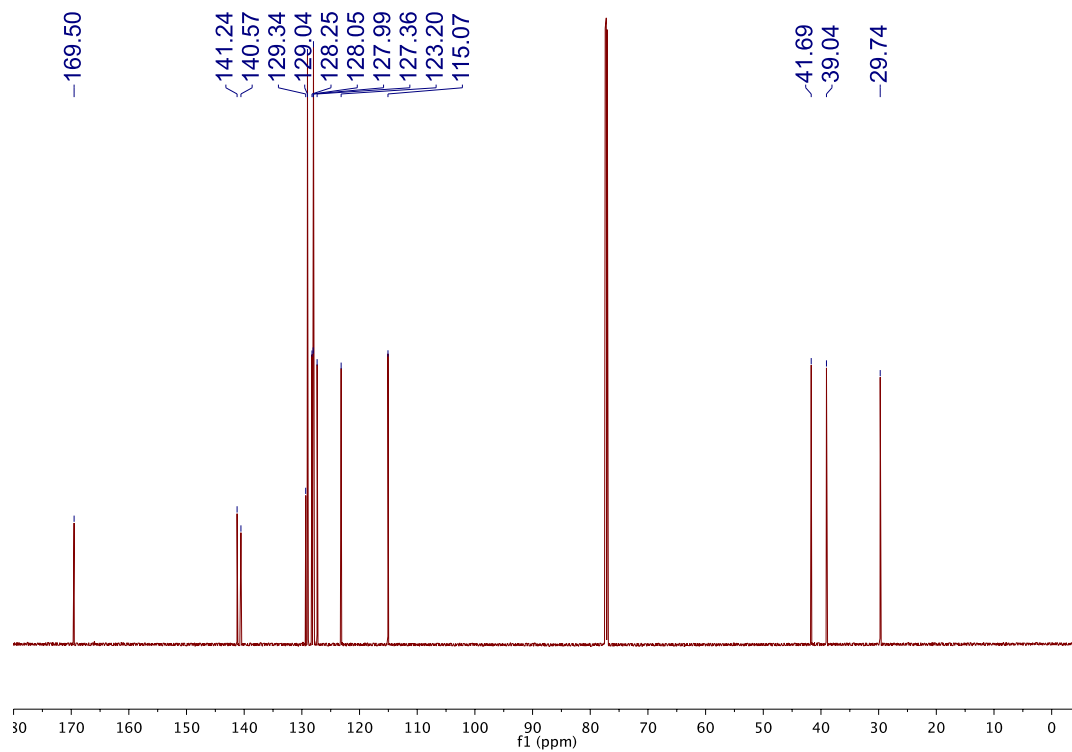

# 1-Ethyl-1,2,3,4-tetrahydroquinolin-2-one (23d)

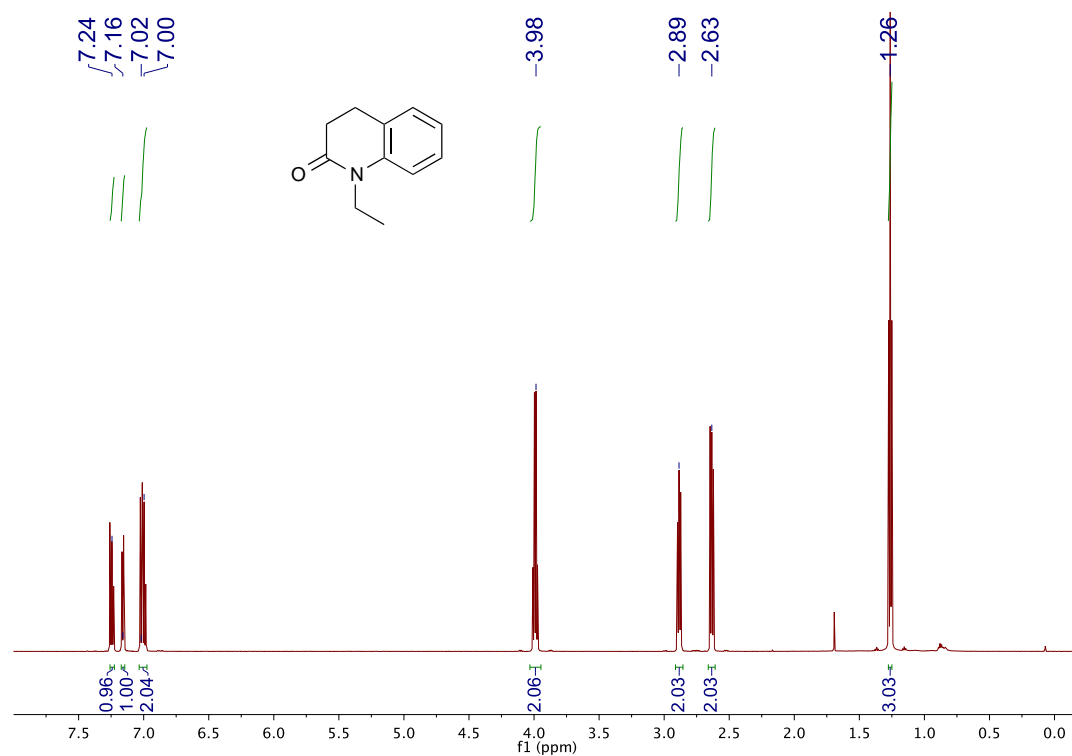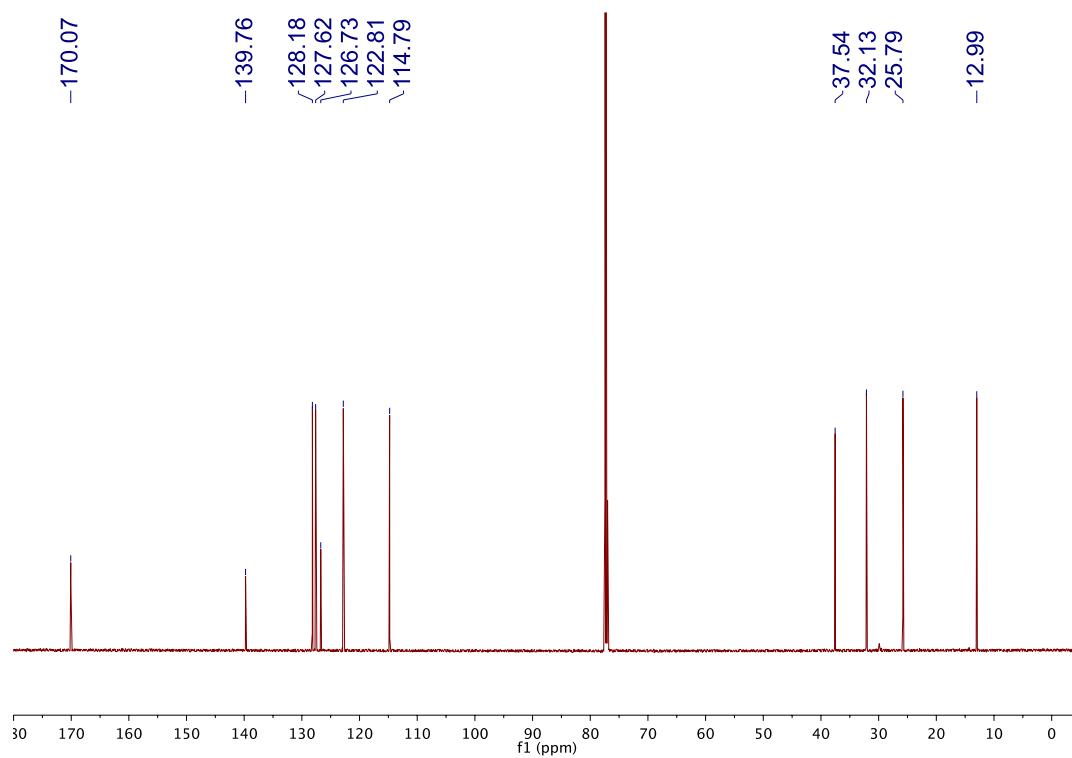



# 1-Benzyl-1,2,3,4-tetrahydroquinolin-2-one (23e)

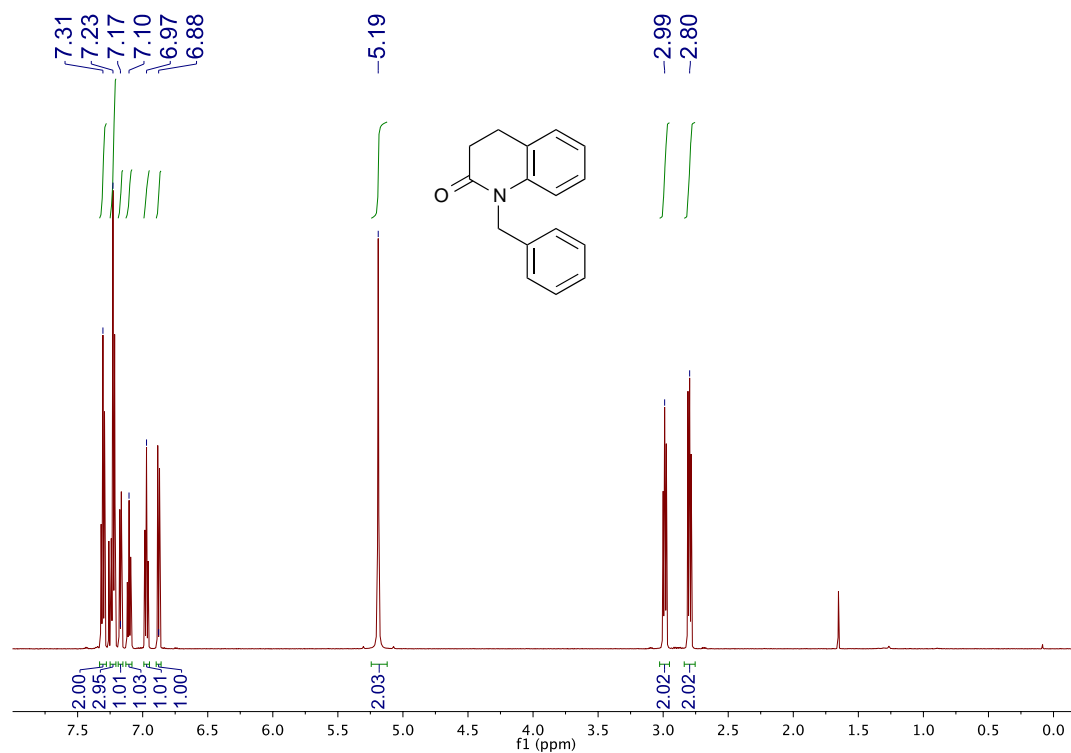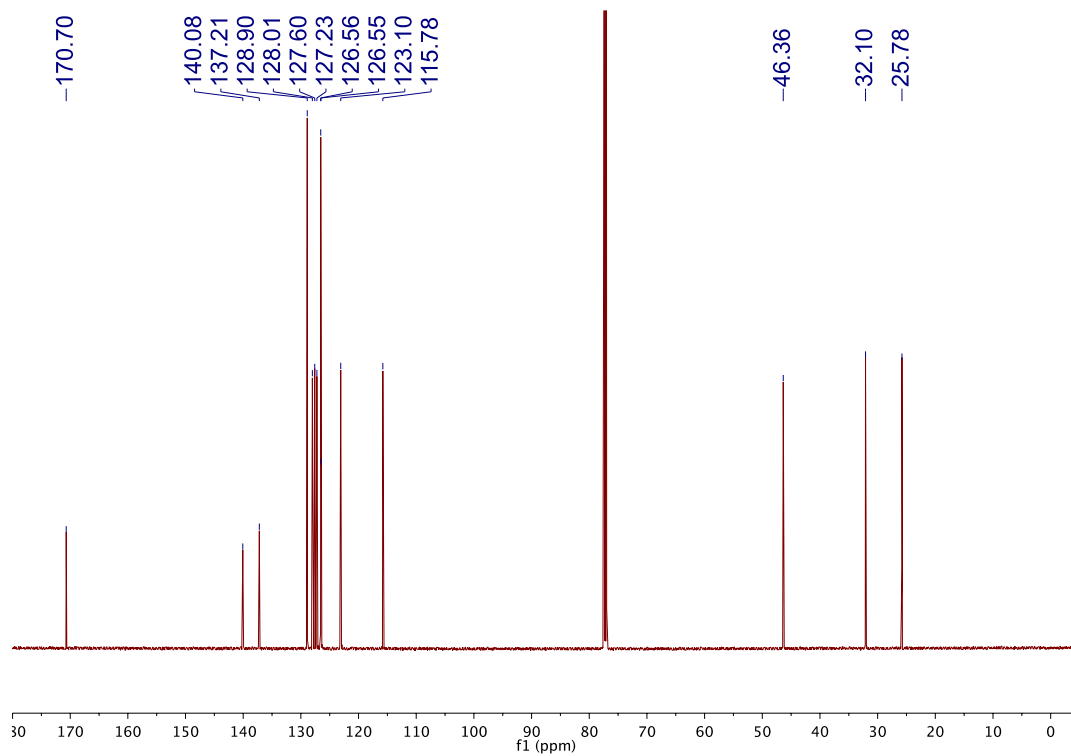

# 6-Bromo-4,4-dimethyl-1-(propan-2-yl)-1,2,3,4-tetrahydroquinolin-2-one

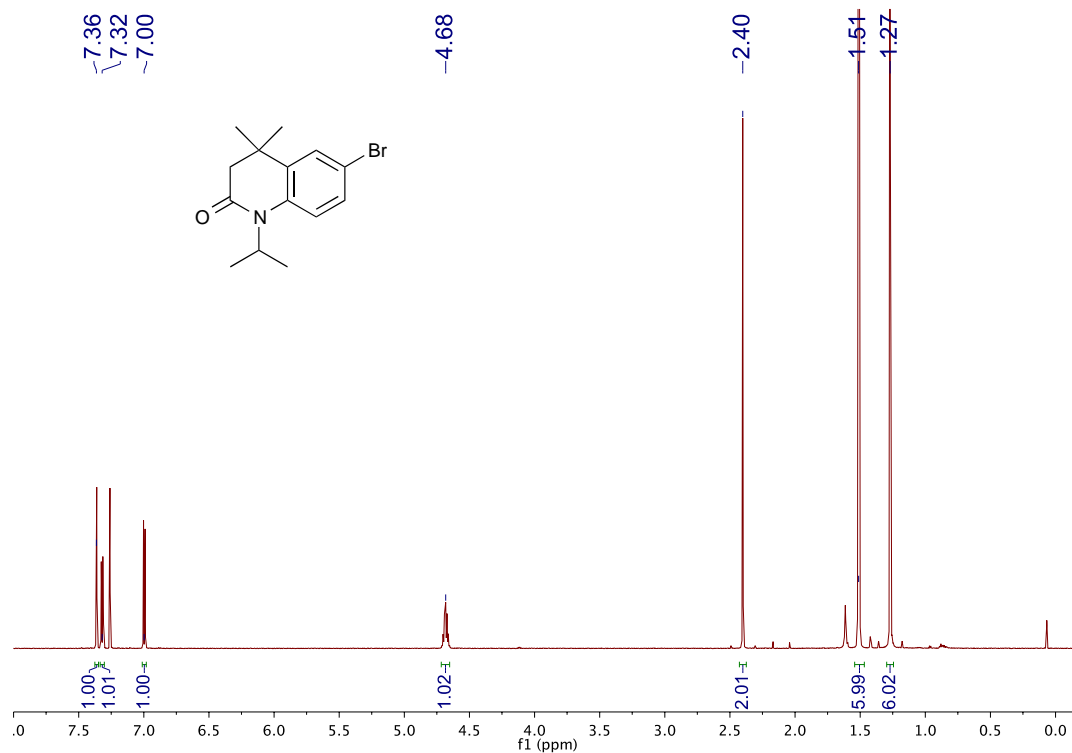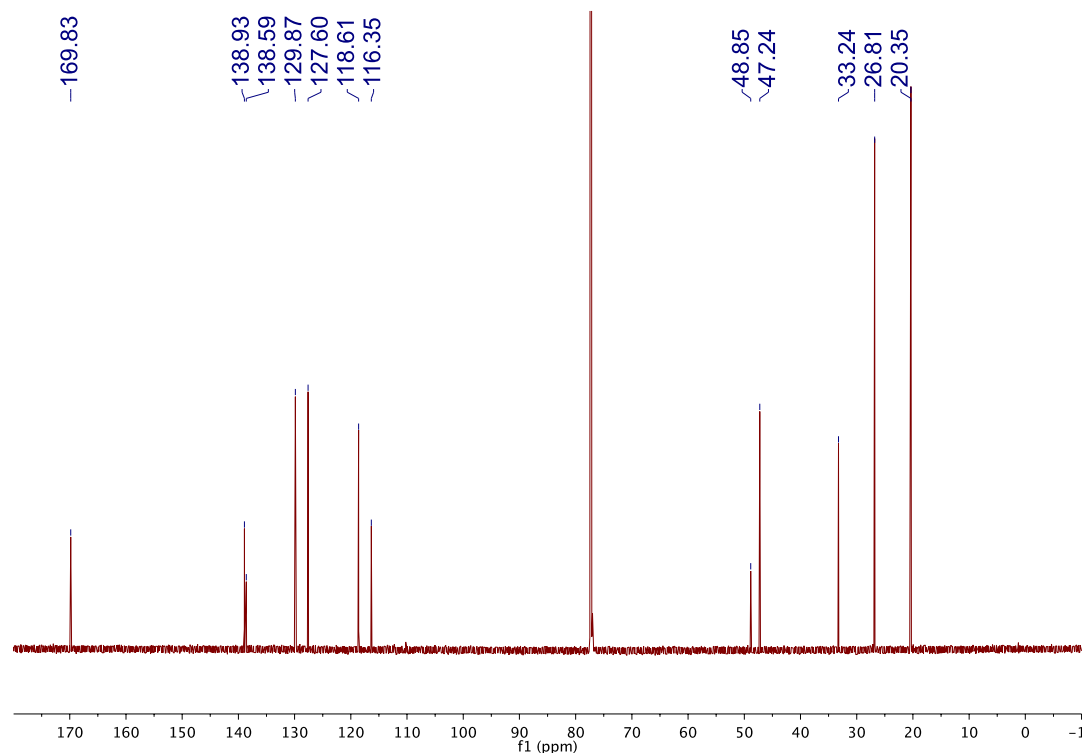

# 6-Bromo-4,4-dimethyl-1-(propan-2-yl)-1,2,3,4-tetrahydroquinoline (26)

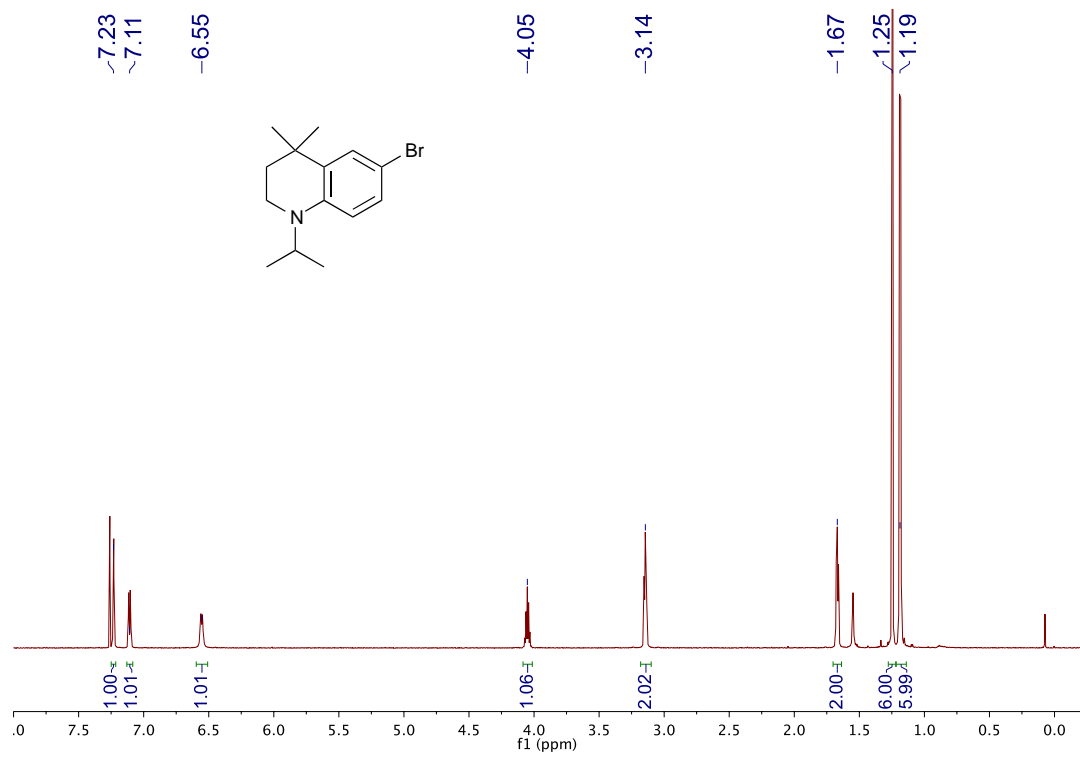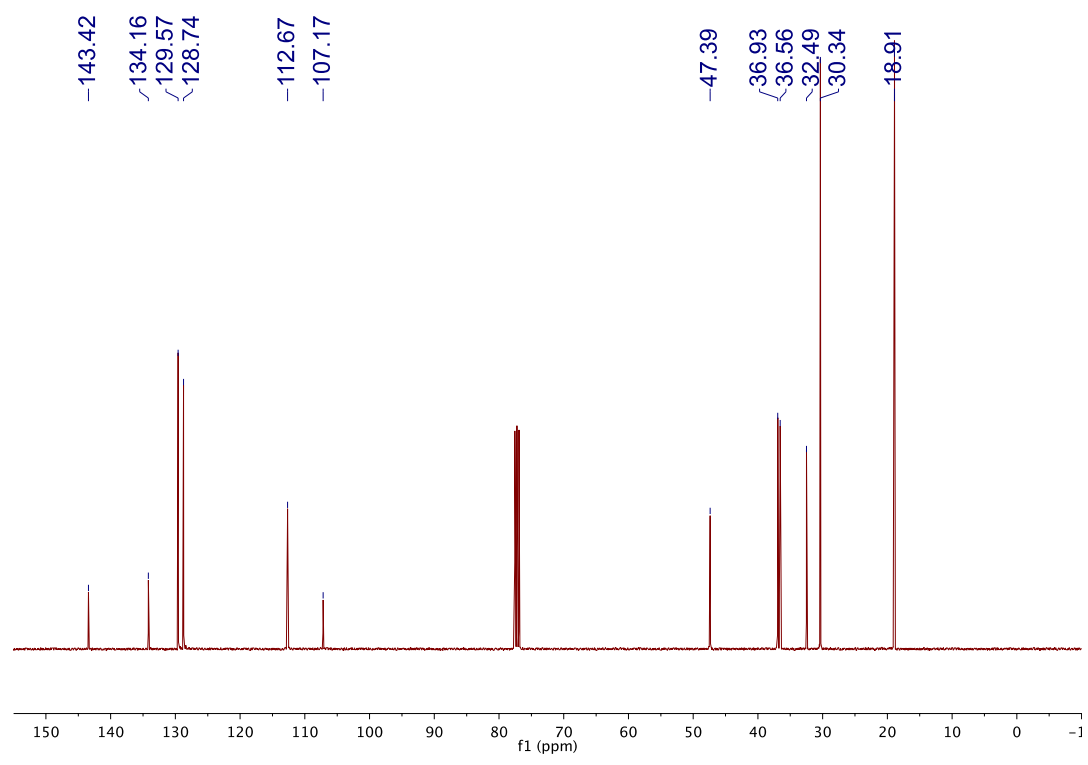

# Methyl 4-(tetramethyl-1,3,2-dioxaborolan-2-yl)benzoate (27)

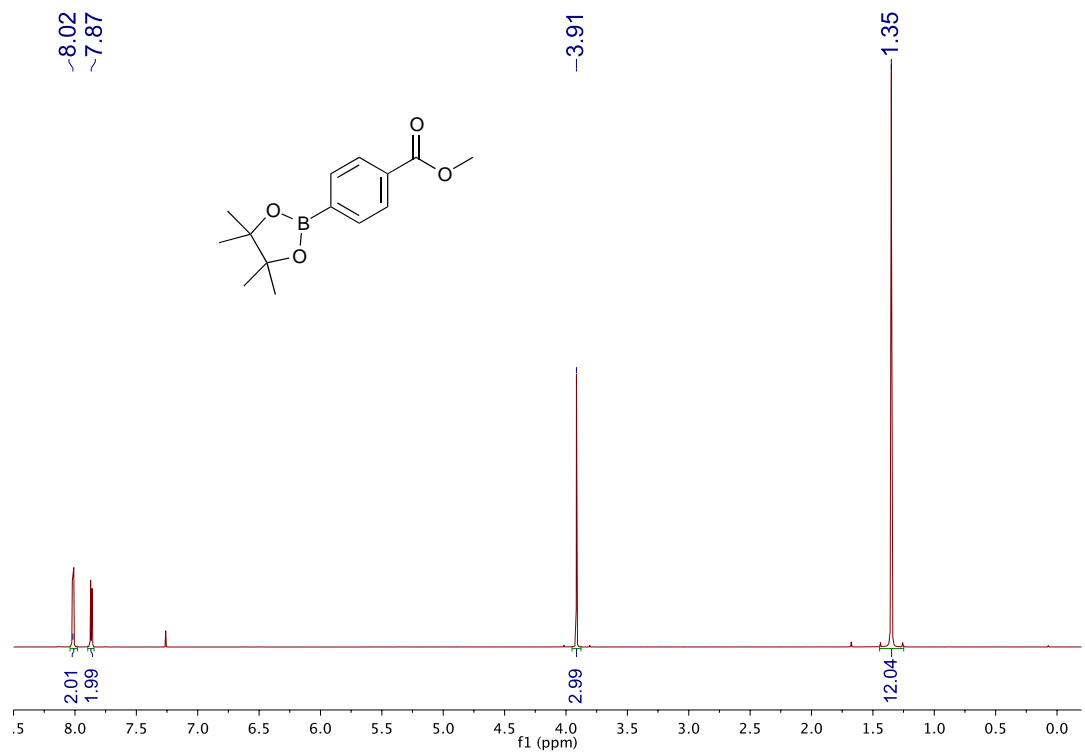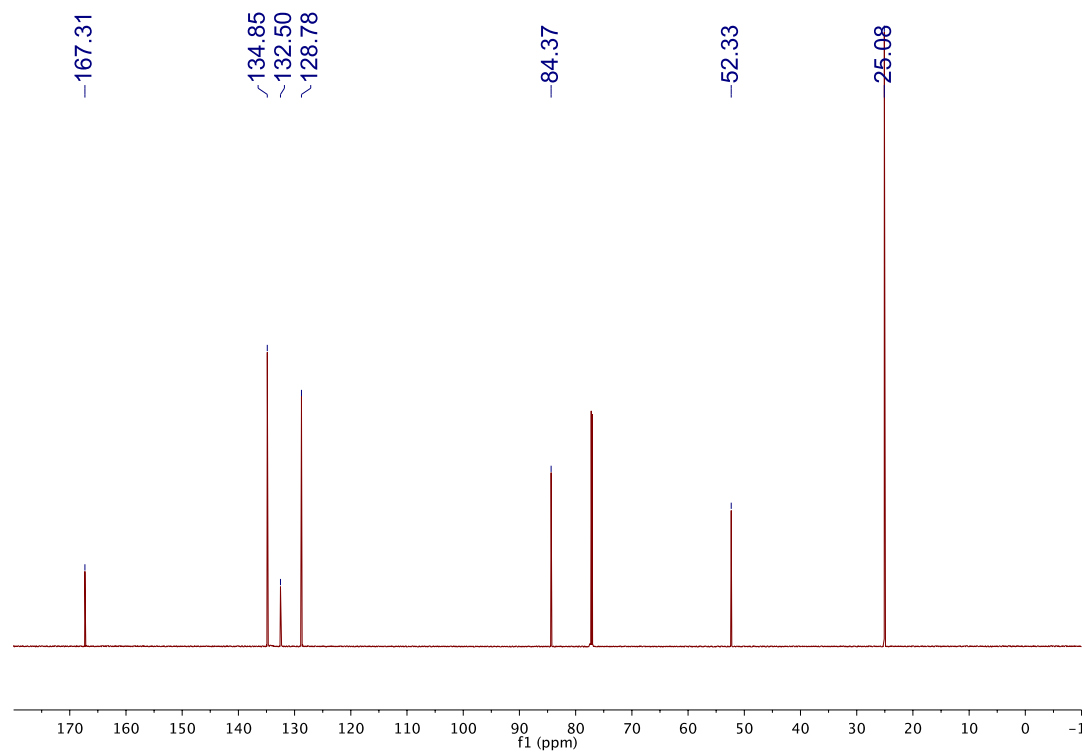

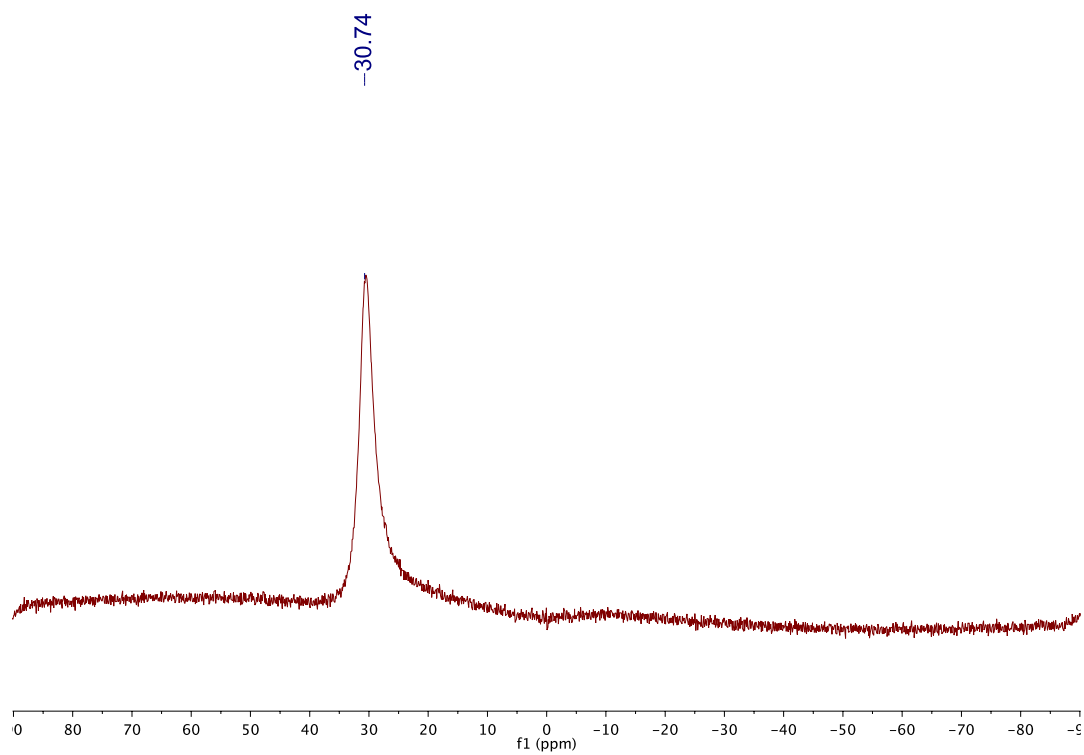

**Methyl 4-[4,4-dimethyl-1-(propan-2-yl)-1,2,3,4-tetrahydroquinolin-6-yl]benzoate (28)**

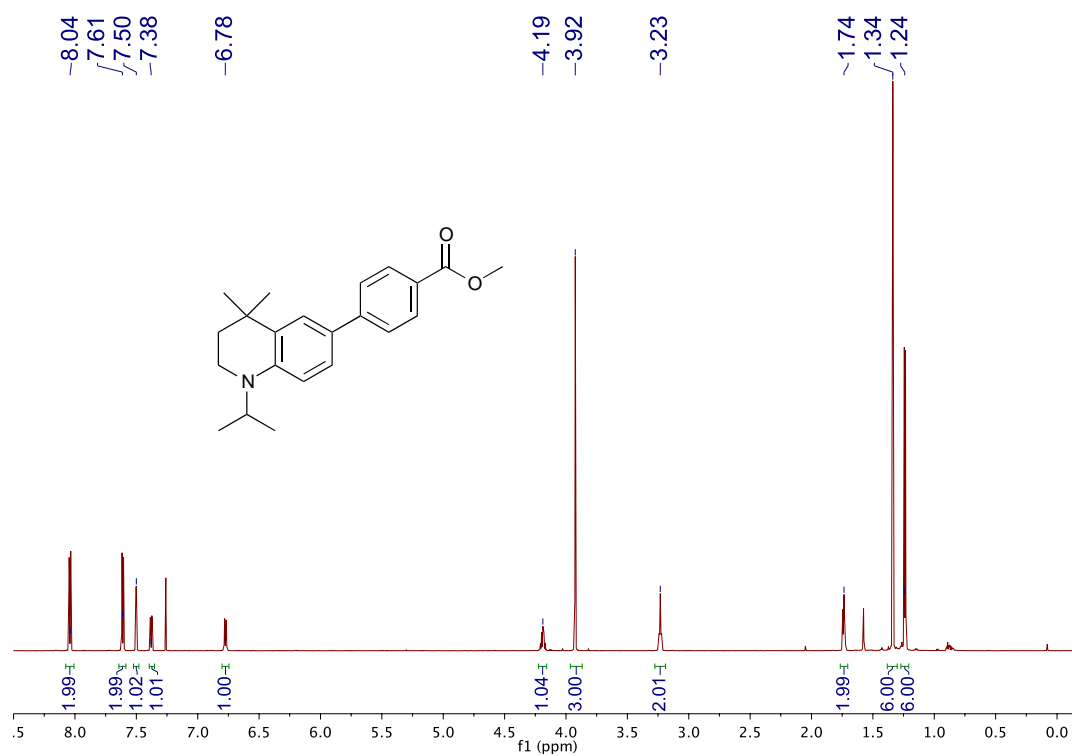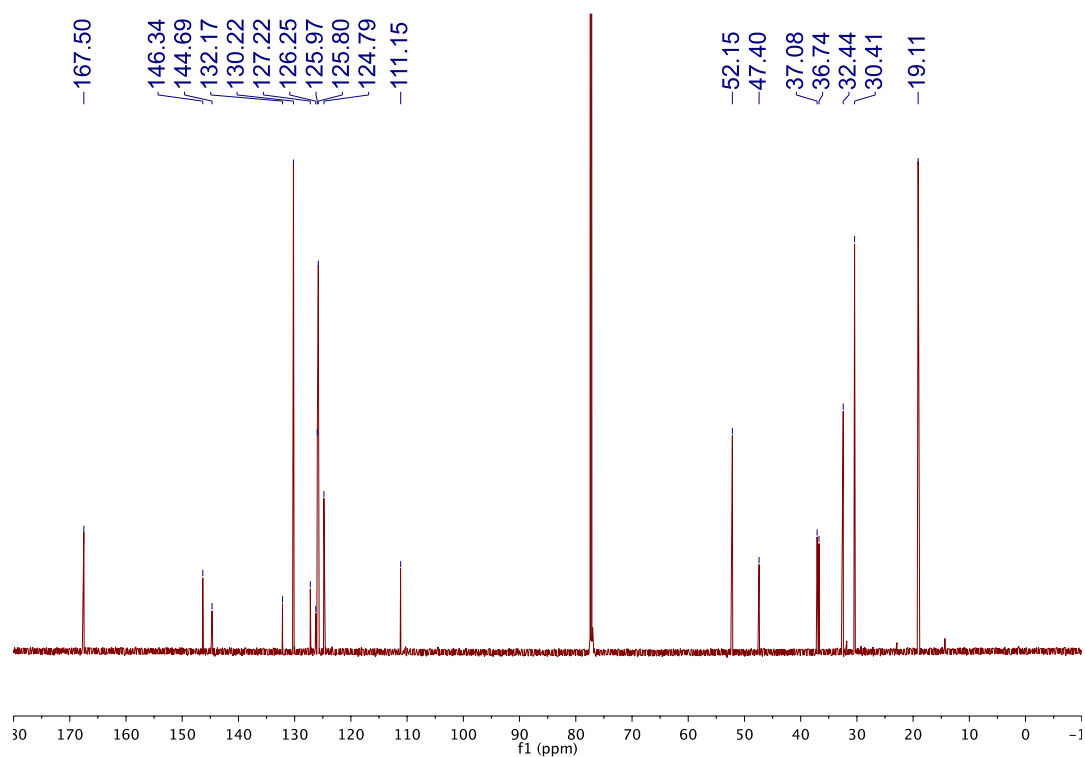

**4,4-Dimethyl-1-(propan-2-yl)-6-(tetramethyl-1,3,2-dioxaborolan-2-yl)-1,2,3,4-tetrahydroquinoline (29)**

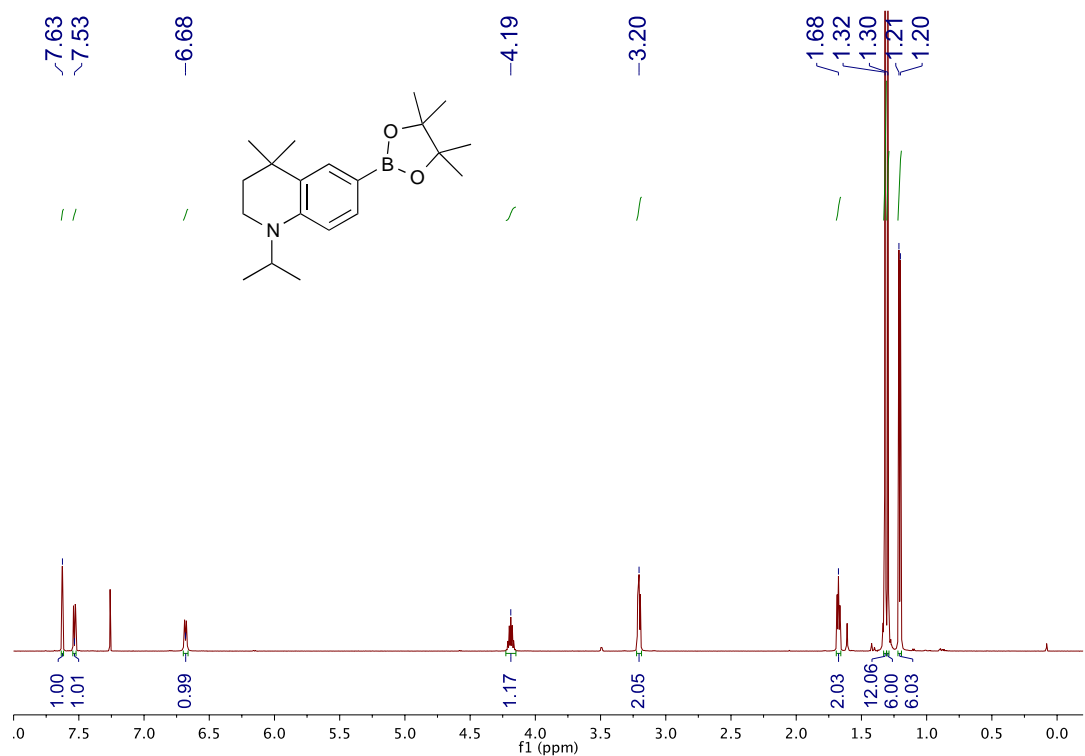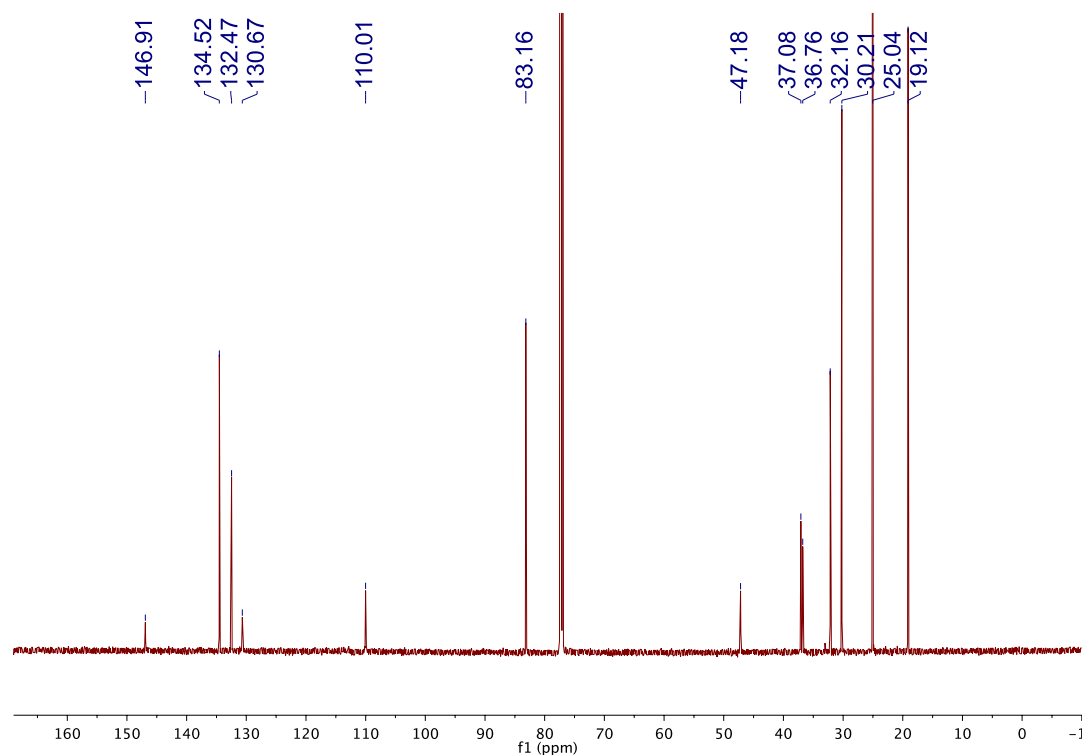

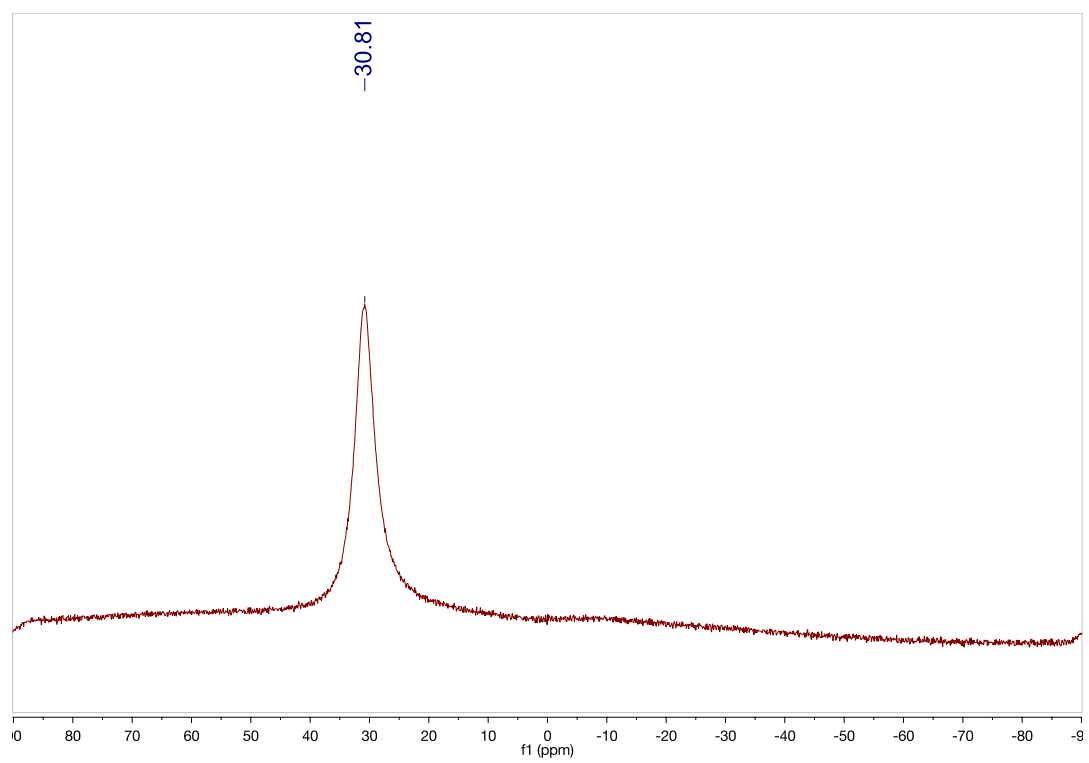



**4,4-Dimethyl-1-(propan-2-yl)-6-(tetramethyl-1,3,2-dioxaborolan-2-yl)-1,4-dihydroquinoline (30)**

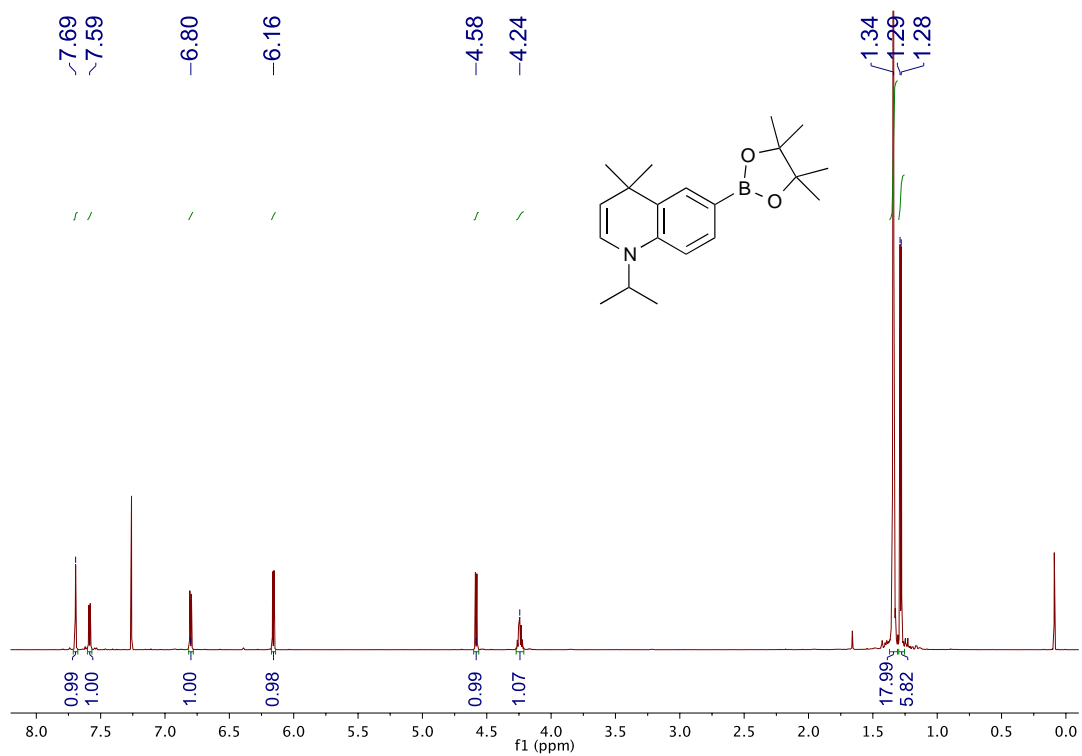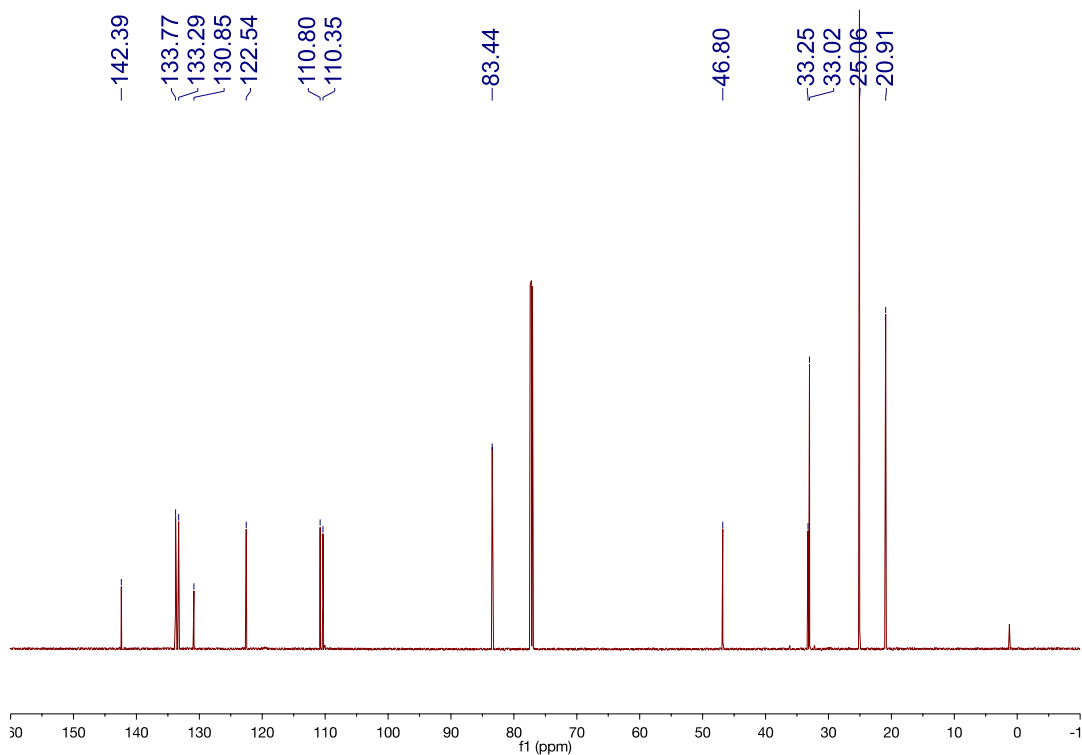

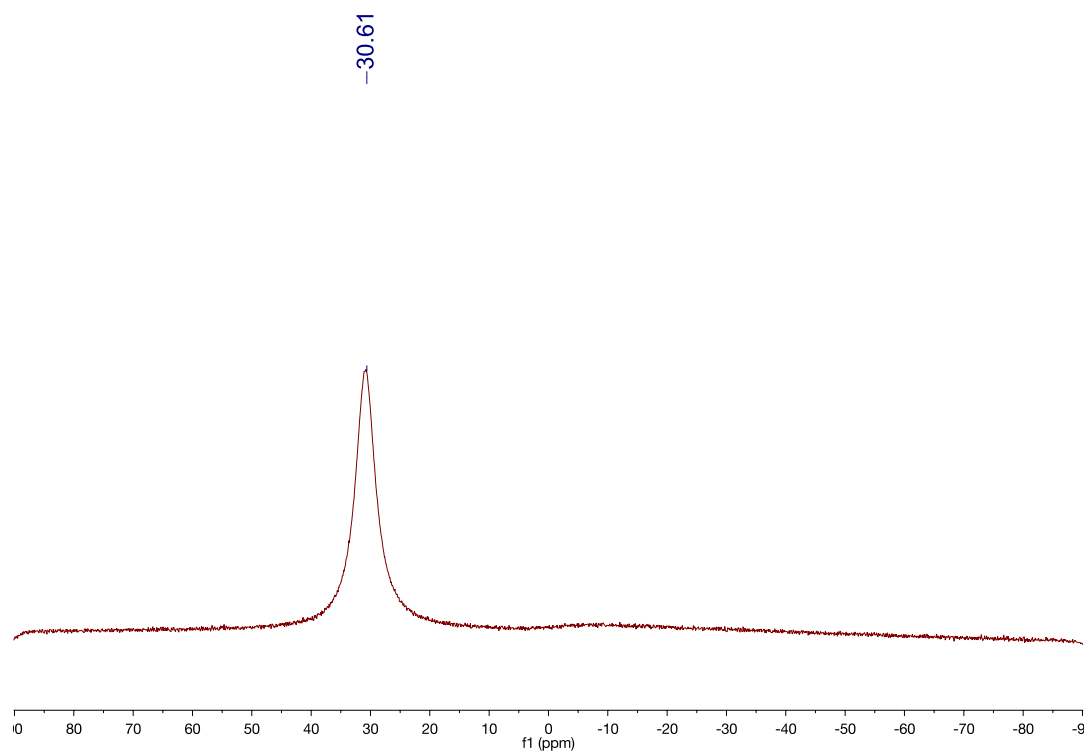

## 5. X-ray crystallography

### 6-Iodo-4,4,8-trimethyl-1,2,3,4-tetrahydroquinolin-2-one (13)

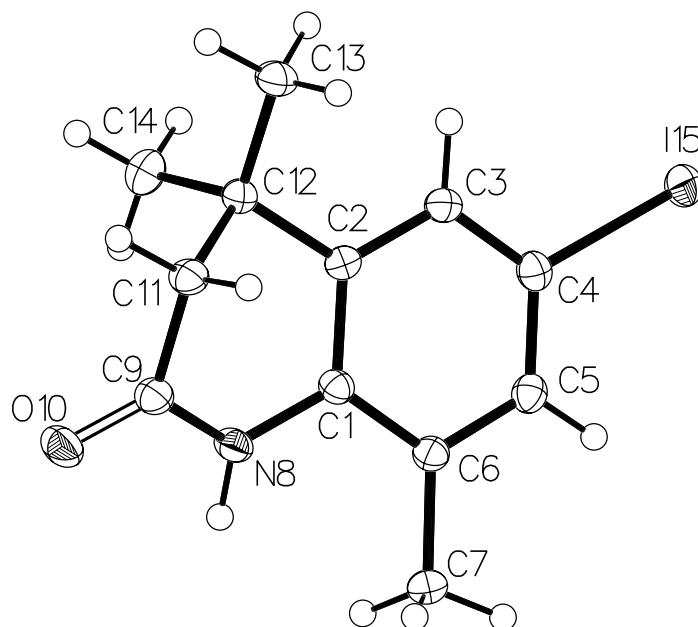

Figure S9: X-ray molecular structure of compound 13. Thermal ellipsoids are drawn at the 50% probability level. Selected bond distances (Å): C(4)-I(15) 2.101, C(1)-N(8) 1.402, C(9)-N(8) 1.352, C(9)-O(10) 1.229, C(9)-C(11) 1.505.

### 6-Iodo-4,4,8-trimethyl-1,2,3,4-tetrahydroquinoline (14)

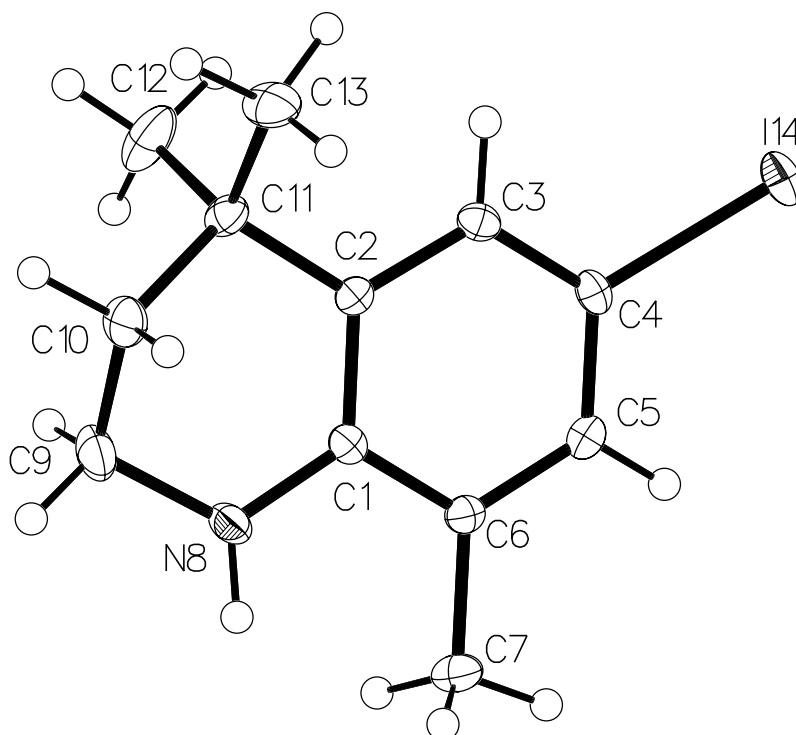

Figure S10: X-ray molecular structure of compound 14. Anisotropic displacement ellipsoids are drawn at the 50% probability level. Selected bond distances (Å): C(4)-I(14) 2.103, C(1)-N(8) 1.384, C(9)-N(8) 1.446, C(9)-C(10) 1.516. RMSD between the two molecules in the asymmetric unit (Å): 0.345 (without inversion), 0.990 (with inversion).

**6-Iodo-4,4,8-trimethyl-2-(propan-2-yloxy)-3,4-dihydroquinoline (15b)**

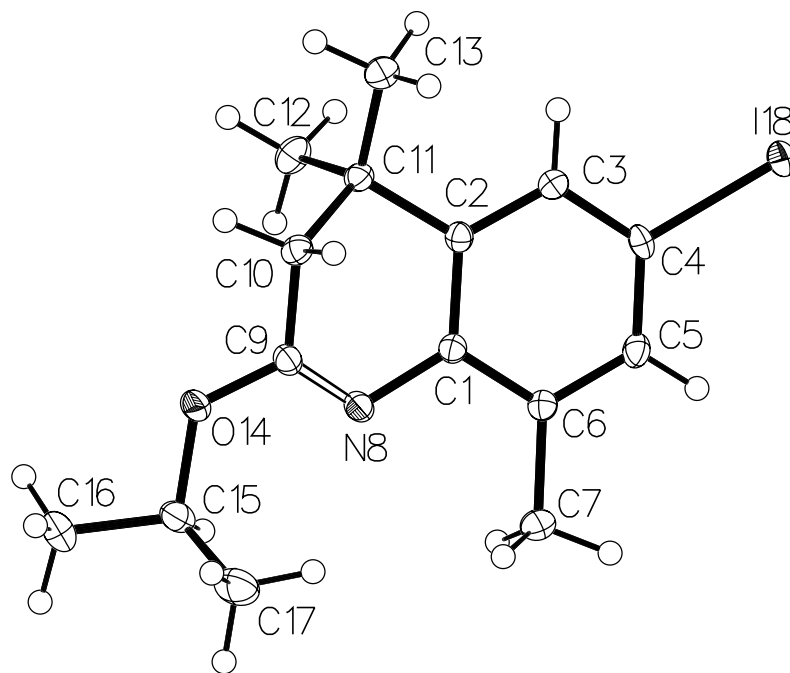

**Figure S11:** X-ray molecular structure of compound 15b. Thermal ellipsoids are drawn at the 50% probability level. Selected bond distances (Å): C(4)-I(18) 2.100, C(1)-N(8) 1.412, C(9)-N(8) 1.285, C(9)-O(14) 1.334, C(15)-O(14) 1.456.

**6-Iodo-4,4-dimethyl-1,2,3,4-tetrahydroquinolin-2-one (19)**

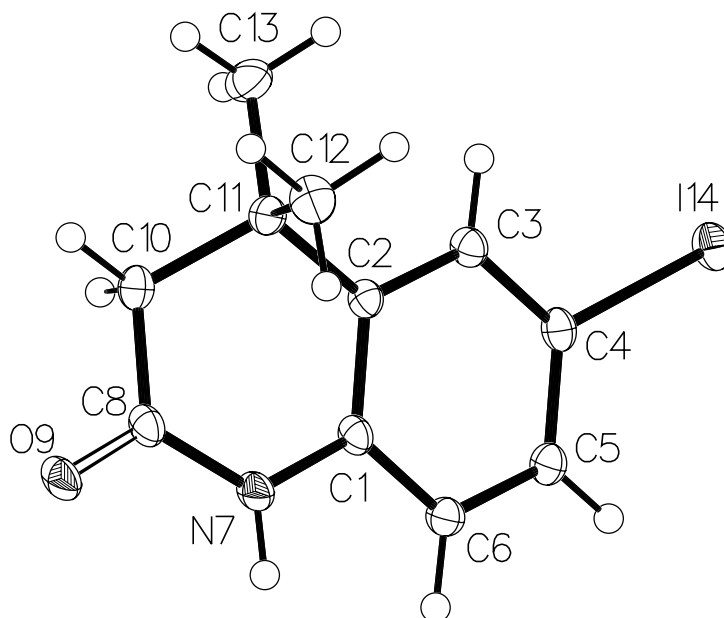

**Figure S12:** X-ray molecular structure of compound 19. Thermal ellipsoids are drawn at the 50% probability level. Selected bond distances (Å): C(4)-I(14) 2.098, C(1)-N(7) 1.404, C(8)-N(7) 1.356, C(8)-O(9) 1.237, C(8)-C(10) 1.503.

**4,4-Dimethyl-1-(propan-2-yl)-6-(tetramethyl-1,3,2-dioxaborolan-2-yl)-1,2,3,4-tetrahydroquinoline (29)**

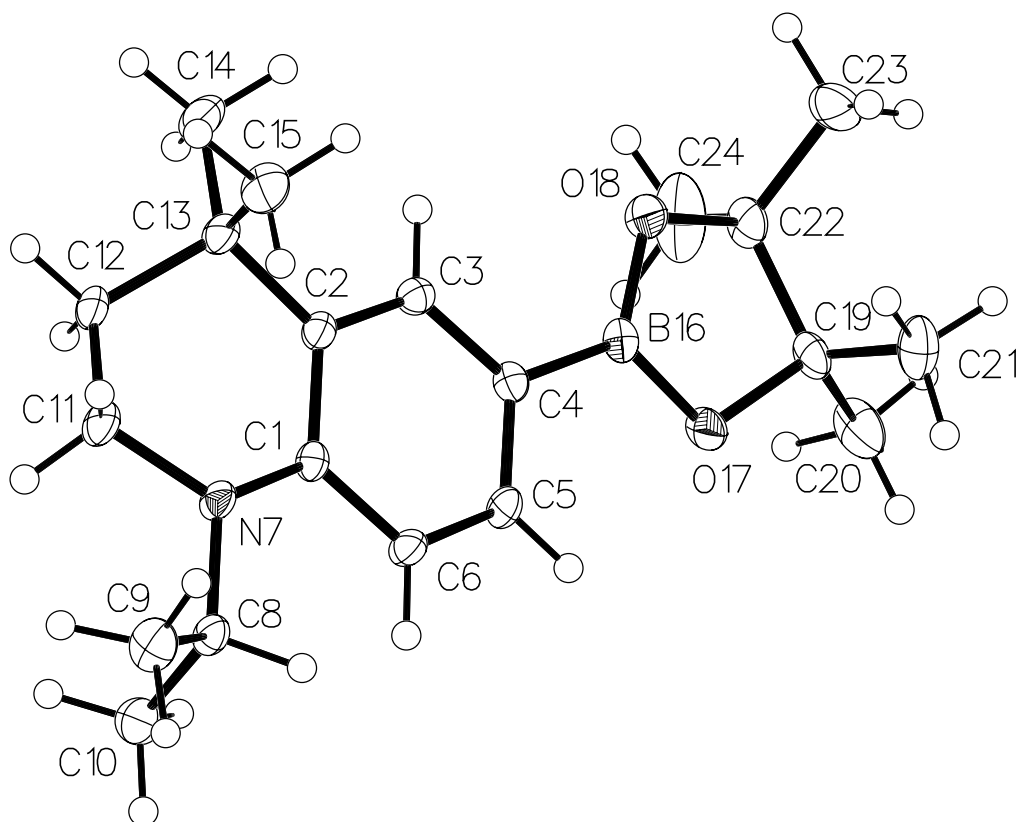

**Figure S13: X-ray molecular structure of compound 29 (one of two molecules in the asymmetric unit). Thermal ellipsoids are drawn at the 50% probability level. Selected bond distances (Å): C(4)-B(16) 1.545, C(1)-N(7) 1.377, C(8)-N(7) 1.467, N(7)-C(11) 1.458. RMSD between the two molecules in the asymmetric unit (Å): 1.281 (without inversion), 0.215 (with inversion).**

**4,4-Dimethyl-1-(propan-2-yl)-6-(tetramethyl-1,3,2-dioxaborolan-2-yl)-1,4-dihydroquinoline (30)**

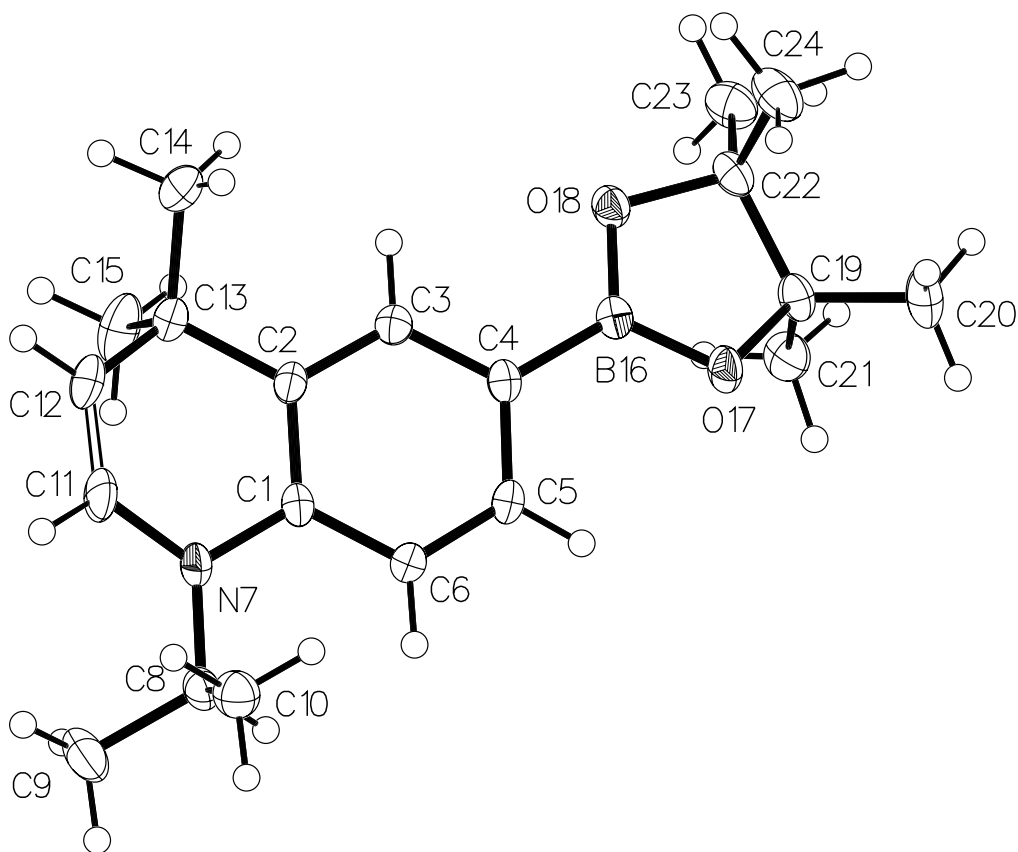

**Figure S14: X-ray molecular structure of compound 30 (one of two molecules in the asymmetric unit). Thermal ellipsoids are drawn at the 50% probability level. Selected bond distances (Å): C(4)-B(16) 1.546, C(1)-N(7) 1.394, C(8)-N(7) 1.467, N(7)-C(11) 1.398. RMSD between the two molecules in the asymmetric unit (Å): 1.350 (without inversion), 0.252 (with inversion).**

| Product number                              | 13                                                            | 14                                                            | 15b                                                           | 19                                                            | 29                                                            | 30                                                             |
|---------------------------------------------|---------------------------------------------------------------|---------------------------------------------------------------|---------------------------------------------------------------|---------------------------------------------------------------|---------------------------------------------------------------|----------------------------------------------------------------|
| Empirical formula                           | C <sub>12</sub> H <sub>14</sub> INO                           | C <sub>12</sub> H <sub>16</sub> IN                            | C <sub>15</sub> H <sub>20</sub> INO                           | C <sub>11</sub> H <sub>12</sub> INO                           | C <sub>20</sub> H <sub>32</sub> BNO <sub>2</sub>              | C <sub>20</sub> H <sub>30</sub> BNO <sub>2</sub>               |
| Formula weight                              | 315.14                                                        | 301.16                                                        | 357.22                                                        | 301.12                                                        | 329.27                                                        | 327.26                                                         |
| Temperature/K                               | 120                                                           | 120                                                           | 120                                                           | 120                                                           | 120                                                           | 120                                                            |
| Crystal system                              | monoclinic                                                    | monoclinic                                                    | monoclinic                                                    | monoclinic                                                    | monoclinic                                                    | monoclinic                                                     |
| Space group                                 | P2 <sub>1</sub> /c                                            | P2 <sub>1</sub> /c                                            | P2 <sub>1</sub> /n                                            | C2/c                                                          | P2 <sub>1</sub> /c                                            | P2 <sub>1</sub> /c                                             |
| a/Å                                         | 10.5231(9)                                                    | 18.0060(8)                                                    | 8.3580(8)                                                     | 18.7230(4)                                                    | 12.0435(6)                                                    | 12.2051(5)                                                     |
| b/Å                                         | 12.4625(11)                                                   | 9.8997(4)                                                     | 15.7426(15)                                                   | 8.16224(10)                                                   | 11.5154(6)                                                    | 11.3054(5)                                                     |
| c/Å                                         | 9.6181(8)                                                     | 13.7872(6)                                                    | 11.7029(11)                                                   | 17.8772(4)                                                    | 28.6939(14)                                                   | 28.6657(12)                                                    |
| α/°                                         | 90                                                            | 90                                                            | 90                                                            | 90                                                            | 90                                                            | 90                                                             |
| β/°                                         | 107.523(2)                                                    | 107.361(2)                                                    | 93.446(2)                                                     | 126.024(3)                                                    | 96.039(2)                                                     | 95.011(2)                                                      |
| γ/°                                         | 90                                                            | 90                                                            | 90                                                            | 90                                                            | 90                                                            | 90                                                             |
| Volume/Å <sup>3</sup>                       | 1202.83(18)                                                   | 2345.66(18)                                                   | 1537.0(3)                                                     | 2209.57(11)                                                   | 3957.4(3)                                                     | 3940.3(3)                                                      |
| Z                                           | 4                                                             | 8                                                             | 4                                                             | 8                                                             | 8                                                             | 8                                                              |
| ρ <sub>calc</sub> /g/cm <sup>3</sup>        | 1.74                                                          | 1.706                                                         | 1.544                                                         | 1.810                                                         | 1.105                                                         | 1.103                                                          |
| μ/mm <sup>-1</sup>                          | 2.637                                                         | 2.694                                                         | 2.073                                                         | 2.866                                                         | 0.069                                                         | 0.069                                                          |
| F(000)                                      | 616                                                           | 1184                                                          | 712                                                           | 1168.0                                                        | 1440                                                          | 1424                                                           |
| Crystal size/mm <sup>3</sup>                | 0.317 × 0.304 × 0.190                                         | 0.266 × 0.165 × 0.160                                         | 0.183 × 0.158 × 0.081                                         | 0.521 × 0.365 × 0.212                                         | 0.312 × 0.309 × 0.204                                         | 0.216 × 0.188 × 0.082                                          |
| Radiation                                   | MoKα (λ = 0.71073)                                            | MoKα (λ = 0.71073)                                            | MoKα (λ = 0.71073)                                            | MoKα (λ = 0.71073)                                            | MoKα (λ = 0.71073)                                            | MoKα (λ = 0.71073)                                             |
| 2θ range for data collection/°              | 4.058 to 65.308                                               | 4.74 to 63.142                                                | 5.176 to 65.28                                                | 5.004 to 75.642                                               | 3.814 to 54.998                                               | 4.586 to 58.996                                                |
| Index ranges                                | -15 ≤ h ≤ 15, -18 ≤ k ≤ 18, -14 ≤ l ≤ 14                      | -26 ≤ h ≤ 26, -14 ≤ k ≤ 14, -20 ≤ l ≤ 20                      | -12 ≤ h ≤ 12, -23 ≤ k ≤ 23, -17 ≤ l ≤ 17                      | -32 ≤ h ≤ 31, -13 ≤ k ≤ 13, -30 ≤ l ≤ 30                      | -15 ≤ h ≤ 15, -14 ≤ k ≤ 14, -37 ≤ l ≤ 37                      | -16 ≤ h ≤ 16, -15 ≤ k ≤ 15, -39 ≤ l ≤ 39                       |
| Reflections collected                       | 20137                                                         | 54918                                                         | 24942                                                         | 90313                                                         | 70443                                                         | 81825                                                          |
| Independent reflections                     | 4392 [R <sub>int</sub> = 0.0659, R <sub>sigma</sub> = 0.0479] | 7857 [R <sub>int</sub> = 0.0311, R <sub>sigma</sub> = 0.0196] | 5530 [R <sub>int</sub> = 0.0719, R <sub>sigma</sub> = 0.0544] | 5817 [R <sub>int</sub> = 0.0350, R <sub>sigma</sub> = 0.0129] | 9094 [R <sub>int</sub> = 0.0652, R <sub>sigma</sub> = 0.0454] | 10946 [R <sub>int</sub> = 0.0548, R <sub>sigma</sub> = 0.0422] |
| Data/restraints/parameters                  | 4392/0/139                                                    | 7857/0/259                                                    | 5530/0/168                                                    | 5817/0/129                                                    | 9094/0/449                                                    | 10946/0/449                                                    |
| Goodness-of-fit on F <sup>2</sup>           | 1.04                                                          | 1.081                                                         | 1.05                                                          | 1.088                                                         | 1.039                                                         | 1.034                                                          |
| Final R indexes [I ≥ 2σ (I)]                | R <sub>1</sub> = 0.0532, wR <sub>2</sub> = 0.1382             | R <sub>1</sub> = 0.0279, wR <sub>2</sub> = 0.0590             | R <sub>1</sub> = 0.0591, wR <sub>2</sub> = 0.1448             | R <sub>1</sub> = 0.0190, wR <sub>2</sub> = 0.0470             | R <sub>1</sub> = 0.0600, wR <sub>2</sub> = 0.1337             | R <sub>1</sub> = 0.0547, wR <sub>2</sub> = 0.1250              |
| Final R indexes [all data]                  | R <sub>1</sub> = 0.0570, wR <sub>2</sub> = 0.1426             | R <sub>1</sub> = 0.0374, wR <sub>2</sub> = 0.0632             | R <sub>1</sub> = 0.0664, wR <sub>2</sub> = 0.1508             | R <sub>1</sub> = 0.0233, wR <sub>2</sub> = 0.0486             | R <sub>1</sub> = 0.0919, wR <sub>2</sub> = 0.1484             | R <sub>1</sub> = 0.0890, wR <sub>2</sub> = 0.1412              |
| Largest diff. peak/hole / e Å <sup>-3</sup> | 2.72/-0.91                                                    | 1.72/-2.80                                                    | 2.73/-0.85                                                    | 0.57/-0.46                                                    | 0.51/-0.26                                                    | 0.39/-0.19                                                     |

**Table S1: Crystallographic data for compounds 13, 14, 15b, 19, 29 and 30. CCDC (1433617-1433622) contains the full supplementary crystallographic data for this paper. The data can be obtained free of charge from The Cambridge Crystallographic Data Centre via [www.ccdc.cam.ac.uk/getstructures](http://www.ccdc.cam.ac.uk/getstructures) [11–15].**

## 6. References

- (1) Rueping, M.; Theissmann, T.; Stoeckel, M.; Antonchick, A. P. *Org. Biomol. Chem.* **2011**, *9*, 6844–6850.
- (2) Katritzky, A. R.; Rachwal, B.; Rachwal, S. *J. Org. Chem.* **1996**, *60*, 2588–2596.
- (3) Compain, G.; Bonneau, C.; Martin-Mingot, A.; Thibaudeau, S. *J. Org. Chem.* **2013**, *78*, 4463–4472.
- (4) Yang, B. H.; Buchwald, S. L. *Org. Lett.* **1999**, *1*, 35–37.
- (5) Phippen, C. B. W.; Beattie, J. K.; McErlean, C. S. P. *Chem. Commun.* **2010**, *46* (43), 8234–8236.
- (6) Jean-Francois, P.; Stephenson, C. R. J.; Defieber, C.; Carreira, E. M. *Org. Lett.* **2005**, *7* (6), 3821–3824.
- (7) Conley, R. T.; Knopka, W. N. *J. Org. Chem.* **1964**, *29*, 496–497.
- (8) Zhang, L.; Qureshi, Z.; Sonaglia, L.; Lautens, M. *Angew. Chem. Int. Ed.* **2014**, *53*, 13850–13853.
- (9) Liu, B.; Fan, Y.; Gao, Y.; Sun, C.; Xu, C.; Zhu, J. *J. Am. Chem. Soc.* **2013**, *135*, 468–473.
- (10) Yamamoto, T.; Morita, T.; Takagi, J.; Yamakawa, T. *Org. Lett.* **2011**, *13* (21), 5766–5769.
- (11) Dolomanov, O. V.; Bourhis, L. J.; Gildea, R. J.; Howard, J. A. K.; Puschmann, H. *J. Appl. Crystallogr.* **2009**, *42* (2), 339–341.
- (12) Sheldrick, G. M. *Acta Cryst.* **2008**, *A64*, 112–122.
- (13) Sheldrick, G. M. *Acta Cryst.* **2015**, *A71* (1), 3–8.
- (14) Sheldrick, G. M. *Acta Cryst.* **2015**, *C71* (1), 3–8.
- (15) APEX2; SAINT; SADABS. *Bruker AXS Inc., Madison, Wisconsin, USA* **2014**.
