# Supplementary material for: Practical synthetic strategies towards lipophilic 6-iodotetrahydroquinolines and -dihydroquinolines
Source: Beilstein J Org Chem. 2016 Aug 16;12:1851–62. doi: 10.3762/bjoc.12.174 (PMC5082455; doi:10.3762/bjoc.12.174)
Supplement: File 2 — Crystallographic Information Files of compounds 13, 14, 15b, 19, 29, and 30. [file Beilstein_J_Org_Chem-12-1851-s002.zip]

Archive with 12 entries (12 files):
- 13_ 1433620.cif
- 13_1433620_cifreport.pdf
- 14_ 1433619.cif
- 14_1433619_cifreport.pdf
- 15b_ 1433618.cif
- 15b_1433618_cifreport.pdf
- 19_ 1433617.cif
- 19_1433618_cifreport.pdf
- 29_ 1433622.cif
- 29_ 1433622_cifreport.pdf
- 30_ 1433621.cif
- 30_1433621_cifreport.pdf
