# Supplementary material for: Practical synthetic strategies towards lipophilic 6-iodotetrahydroquinolines and -dihydroquinolines
Source: Beilstein J Org Chem. 2016 Aug 16;12:1851–62. doi: 10.3762/bjoc.12.174 (PMC5082455; doi:10.3762/bjoc.12.174)
Supplement: File 2 — Crystallographic Information Files of compounds 13, 14, 15b, 19, 29, and 30. [file Beilstein_J_Org_Chem-12-1851-s002.zip › 13_ 1433620.cif]

data_mo_dc113face
_audit_creation_date              2015-11-16
_audit_creation_method
;
Olex2 1.2
(compiled 2015.09.30 svn.r3233 for OlexSys, GUI svn.r5103)
;
_shelxl_version_number            2014-3
_publ_contact_author_address      Chemistry Department, Durham University, South Road, Durham, DH1 3LE, UK
_publ_contact_author_email        andy.whiting@durham.ac.uk
_publ_contact_author_name         Andrew Whiting
_publ_contact_author_phone        ?
_publ_requested_journal           Beilstein J. Org. Chem.
_publ_section_references
;
Dolomanov, O.V., Bourhis, L.J., Gildea, R.J, Howard, J.A.K. & Puschmann, H.
 (2009), J. Appl. Cryst. 42, 339-341.

Sheldrick, G.M. (2015). Acta Cryst. A71, 3-8.

Sheldrick, G.M. (2015). Acta Cryst. C71, 3-8.
;
_chemical_name_common             ?
_chemical_name_systematic
6-Iodo-4,4,8-trimethyl-1,2,3,4-tetrahydroquinolin-2-one
_chemical_formula_moiety          'C12 H14 I N O'
_chemical_formula_sum             'C12 H14 I N O'
_chemical_formula_weight          315.14
_chemical_melting_point           ?
loop_
  _atom_type_symbol
  _atom_type_description
  _atom_type_scat_dispersion_real
  _atom_type_scat_dispersion_imag
  _atom_type_scat_source
 'C' 'C' 0.0033 0.0016 'International Tables Vol C Tables 4.2.6.8 and 6.1.1.4'
 'H' 'H' 0.0000 0.0000 'International Tables Vol C Tables 4.2.6.8 and 6.1.1.4'
 'I' 'I' -0.4742 1.8119 'International Tables Vol C Tables 4.2.6.8 and 6.1.1.4'
 'N' 'N' 0.0061 0.0033 'International Tables Vol C Tables 4.2.6.8 and 6.1.1.4'
 'O' 'O' 0.0106 0.0060 'International Tables Vol C Tables 4.2.6.8 and 6.1.1.4'

_shelx_space_group_comment
;
The symmetry employed for this shelxl refinement is uniquely defined
by the following loop, which should always be used as a source of
symmetry information in preference to the above space-group names.
They are only intended as comments.
;
_space_group_crystal_system       'monoclinic'
_space_group_IT_number            14
_space_group_name_H-M_alt         'P 1 21/c 1'
_space_group_name_Hall            '-P 2ybc'
loop_
  _space_group_symop_operation_xyz
 'x, y, z'
 '-x, y+1/2, -z+1/2'
 '-x, -y, -z'
 'x, -y-1/2, z-1/2'

_cell_length_a                    10.5231(9)
_cell_length_b                    12.4625(11)
_cell_length_c                    9.6181(8)
_cell_angle_alpha                 90
_cell_angle_beta                  107.523(2)
_cell_angle_gamma                 90
_cell_volume                      1202.83(18)
_cell_formula_units_Z             4
_cell_measurement_reflns_used     9873
_cell_measurement_temperature     120
_cell_measurement_theta_max       32.65
_cell_measurement_theta_min       2.61
_shelx_estimated_absorpt_T_max    ?
_shelx_estimated_absorpt_T_min    ?
_exptl_absorpt_coefficient_mu     2.637
_exptl_absorpt_correction_T_max   0.7948
_exptl_absorpt_correction_T_min   0.4399
_exptl_absorpt_correction_type    multi-scan
_exptl_absorpt_process_details
;
SADABS-2014/4 (Bruker,2014) was used for absorption correction.
wR2(int) was 0.1383 before and 0.1092 after correction.
The Ratio of minimum to maximum transmission is 0.5535.
The \l/2 correction factor is Not present.
;
_exptl_crystal_colour             'clear light colourless'
_exptl_crystal_colour_lustre      clear
_exptl_crystal_colour_modifier    light
_exptl_crystal_colour_primary     colourless
_exptl_crystal_density_diffrn     1.740
_exptl_crystal_density_meas       ?
_exptl_crystal_density_method     ?
_exptl_crystal_description        plate
_exptl_crystal_F_000              616
_exptl_crystal_preparation        -
_exptl_crystal_recrystallization_method
'The material was recrystallised from EtOAc by slow evaporation'
_exptl_crystal_size_max           0.317
_exptl_crystal_size_mid           0.304
_exptl_crystal_size_min           0.19
_exptl_special_details
;
 ?
;
_exptl_transmission_factor_max    ?
_exptl_transmission_factor_min    ?
_diffrn_reflns_av_R_equivalents   0.0659
_diffrn_reflns_av_unetI/netI      0.0479
_diffrn_reflns_Laue_measured_fraction_full 0.998
_diffrn_reflns_Laue_measured_fraction_max 0.998
_diffrn_reflns_limit_h_max        15
_diffrn_reflns_limit_h_min        -15
_diffrn_reflns_limit_k_max        18
_diffrn_reflns_limit_k_min        -18
_diffrn_reflns_limit_l_max        14
_diffrn_reflns_limit_l_min        -14
_diffrn_reflns_number             20137
_diffrn_reflns_point_group_measured_fraction_full 0.998
_diffrn_reflns_point_group_measured_fraction_max 0.998
_diffrn_reflns_theta_full         26.000
_diffrn_reflns_theta_max          32.654
_diffrn_reflns_theta_min          2.029
_diffrn_ambient_temperature       120
_diffrn_detector                  'Bruker APEX2 area detector'
_diffrn_detector_area_resol_mean  7.9
_diffrn_detector_type             'CCD area detector'
_diffrn_measured_fraction_theta_full 0.998
_diffrn_measured_fraction_theta_max 0.998
_diffrn_measurement_device        'three-circle diffractometer'
_diffrn_measurement_device_type   'Bruker SMART APEX2 area detector'
_diffrn_measurement_method        '\w and \f scans'
_diffrn_radiation_monochromator   'mirror optics'
_diffrn_radiation_probe           x-ray
_diffrn_radiation_type            MoK\a
_diffrn_radiation_wavelength      0.71073
_diffrn_source                    'microfocus sealed X-ray tube'
_diffrn_source_type               'Incoatec I\ms'
_diffrn_standards_number          0
_reflns_Friedel_coverage          0.000
_reflns_Friedel_fraction_full     .
_reflns_Friedel_fraction_max      .
_reflns_number_gt                 3899
_reflns_number_total              4392
_reflns_special_details
;
 Reflections were merged by SHELXL according to the crystal
 class for the calculation of statistics and refinement.
 
 _reflns_Friedel_fraction is defined as the number of unique
 Friedel pairs measured divided by the number that would be
 possible theoretically, ignoring centric projections and
 systematic absences.
;
_reflns_threshold_expression      'I > 2\s(I)'
_computing_cell_refinement        'SAINT v8.34A (Bruker, 2013)'
_computing_data_collection        ?
_computing_data_reduction         'SAINT v8.34A (Bruker, 2013)'
_computing_molecular_graphics     'Olex2 (Dolomanov et al., 2009)'
_computing_publication_material   'Olex2 (Dolomanov et al., 2009)'
_computing_structure_refinement   'ShelXL (Sheldrick, 2015)'
_computing_structure_solution     'ShelXT (Sheldrick, 2015)'
_refine_diff_density_max          2.722
_refine_diff_density_min          -0.908
_refine_diff_density_rms          0.266
_refine_ls_extinction_coef        .
_refine_ls_extinction_method      none
_refine_ls_goodness_of_fit_ref    1.040
_refine_ls_hydrogen_treatment     constr
_refine_ls_matrix_type            full
_refine_ls_number_parameters      139
_refine_ls_number_reflns          4392
_refine_ls_number_restraints      0
_refine_ls_R_factor_all           0.0570
_refine_ls_R_factor_gt            0.0532
_refine_ls_restrained_S_all       1.040
_refine_ls_shift/su_max           0.001
_refine_ls_shift/su_mean          0.000
_refine_ls_structure_factor_coef  Fsqd
_refine_ls_weighting_details
'w=1/[\s^2^(Fo^2^)+(0.1029P)^2^+0.2423P] where P=(Fo^2^+2Fc^2^)/3'
_refine_ls_weighting_scheme       calc
_refine_ls_wR_factor_gt           0.1382
_refine_ls_wR_factor_ref          0.1426
_refine_special_details
;
 ?
;
_olex2_refinement_description
;
1. Fixed Uiso
 At 1.2 times of:
  All C(H) groups, All C(H,H) groups, All N(H) groups
 At 1.5 times of:
  All C(H,H,H) groups
2.a Secondary CH2 refined with riding coordinates:
 C11(H11A,H11B)
2.b Aromatic/amide H refined with riding coordinates:
 N8(H8), C3(H3), C5(H5)
2.c Idealised Me refined as rotating group:
 C7(H7A,H7B,H7C), C13(H13A,H13B,H13C), C14(H14A,H14B,H14C)
;
_atom_sites_solution_hydrogens    geom
_atom_sites_solution_primary      ?
_atom_sites_solution_secondary    ?
loop_
  _atom_site_label
  _atom_site_type_symbol
  _atom_site_fract_x
  _atom_site_fract_y
  _atom_site_fract_z
  _atom_site_U_iso_or_equiv
  _atom_site_adp_type
  _atom_site_occupancy
  _atom_site_site_symmetry_order
  _atom_site_calc_flag
  _atom_site_refinement_flags_posn
  _atom_site_refinement_flags_adp
  _atom_site_refinement_flags_occupancy
  _atom_site_disorder_assembly
  _atom_site_disorder_group
 I15 I 0.71126(2) 0.24478(2) 0.52676(2) 0.02554(10) Uani 1 1 d . . . . .
 O10 O -0.03432(15) 0.53548(13) 0.31645(16) 0.0271(3) Uani 1 1 d . . . . .
 N8 N 0.16062(16) 0.46508(14) 0.45597(17) 0.0195(3) Uani 1 1 d . . . . .
 H8 H 0.1347 0.4703 0.5346 0.023 Uiso 1 1 calc R . . . .
 C1 C 0.28606(17) 0.42037(17) 0.46966(18) 0.0166(4) Uani 1 1 d . . . . .
 C2 C 0.31361(18) 0.37985(15) 0.34547(19) 0.0166(3) Uani 1 1 d . . . . .
 C3 C 0.43620(18) 0.33025(16) 0.3618(2) 0.0186(3) Uani 1 1 d . . . . .
 H3 H 0.4562 0.3014 0.2794 0.022 Uiso 1 1 calc R . . . .
 C4 C 0.52854(18) 0.32328(15) 0.4989(2) 0.0189(3) Uani 1 1 d . . . . .
 C5 C 0.50316(19) 0.36766(15) 0.6201(2) 0.0187(3) Uani 1 1 d . . . . .
 H5 H 0.5692 0.3640 0.7125 0.022 Uiso 1 1 calc R . . . .
 C6 C 0.38205(18) 0.41751(16) 0.6077(2) 0.0178(3) Uani 1 1 d . . . . .
 C7 C 0.3565(2) 0.46731(18) 0.7396(2) 0.0241(4) Uani 1 1 d . . . . .
 H7A H 0.3343 0.5434 0.7205 0.036 Uiso 1 1 calc GR . . . .
 H7B H 0.4365 0.4607 0.8237 0.036 Uiso 1 1 calc GR . . . .
 H7C H 0.2820 0.4303 0.7603 0.036 Uiso 1 1 calc GR . . . .
 C9 C 0.07756(19) 0.50055(17) 0.3279(2) 0.0199(4) Uani 1 1 d . . . . .
 C11 C 0.13392(19) 0.49613(16) 0.2016(2) 0.0202(4) Uani 1 1 d . . . . .
 H11A H 0.1965 0.5567 0.2089 0.024 Uiso 1 1 calc R . . . .
 H11B H 0.0606 0.5043 0.1093 0.024 Uiso 1 1 calc R . . . .
 C12 C 0.20728(18) 0.39015(16) 0.1981(2) 0.0184(3) Uani 1 1 d . . . . .
 C13 C 0.2654(2) 0.39354(19) 0.0698(2) 0.0250(4) Uani 1 1 d . . . . .
 H13A H 0.3295 0.4527 0.0839 0.037 Uiso 1 1 calc GR . . . .
 H13B H 0.1934 0.4046 -0.0212 0.037 Uiso 1 1 calc GR . . . .
 H13C H 0.3106 0.3256 0.0647 0.037 Uiso 1 1 calc GR . . . .
 C14 C 0.1100(2) 0.29527(19) 0.1770(3) 0.0273(4) Uani 1 1 d . . . . .
 H14A H 0.1578 0.2281 0.1747 0.041 Uiso 1 1 calc GR . . . .
 H14B H 0.0386 0.3039 0.0849 0.041 Uiso 1 1 calc GR . . . .
 H14C H 0.0715 0.2932 0.2579 0.041 Uiso 1 1 calc GR . . . .

loop_
  _atom_site_aniso_label
  _atom_site_aniso_U_11
  _atom_site_aniso_U_22
  _atom_site_aniso_U_33
  _atom_site_aniso_U_23
  _atom_site_aniso_U_13
  _atom_site_aniso_U_12
 I15 0.01940(14) 0.02864(13) 0.02573(14) -0.00315(4) 0.00251(9) 0.00687(4)
 O10 0.0224(7) 0.0366(9) 0.0234(7) 0.0037(6) 0.0085(6) 0.0113(6)
 N8 0.0194(7) 0.0246(8) 0.0160(7) 0.0021(6) 0.0075(6) 0.0053(6)
 C1 0.0168(8) 0.0176(9) 0.0163(8) 0.0011(6) 0.0063(7) 0.0005(6)
 C2 0.0180(8) 0.0167(8) 0.0151(7) -0.0006(6) 0.0049(6) -0.0003(6)
 C3 0.0192(8) 0.0195(8) 0.0174(8) -0.0020(6) 0.0058(7) 0.0012(6)
 C4 0.0166(8) 0.0184(8) 0.0214(8) 0.0009(7) 0.0053(7) 0.0013(6)
 C5 0.0175(8) 0.0204(8) 0.0171(8) 0.0020(6) 0.0036(6) -0.0010(6)
 C6 0.0181(8) 0.0202(8) 0.0159(8) 0.0002(6) 0.0064(6) -0.0014(6)
 C7 0.0221(9) 0.0342(11) 0.0163(8) -0.0045(7) 0.0062(7) 0.0003(8)
 C9 0.0202(9) 0.0222(9) 0.0171(8) 0.0014(6) 0.0056(7) 0.0028(7)
 C11 0.0216(9) 0.0241(9) 0.0150(8) 0.0023(6) 0.0053(7) 0.0045(7)
 C12 0.0165(8) 0.0229(9) 0.0159(8) -0.0007(6) 0.0051(6) 0.0008(6)
 C13 0.0235(10) 0.0353(11) 0.0176(8) -0.0013(8) 0.0084(7) 0.0047(8)
 C14 0.0238(10) 0.0284(11) 0.0279(10) -0.0051(8) 0.0048(8) -0.0054(8)

_geom_special_details
;
 All esds (except the esd in the dihedral angle between two l.s. planes)
 are estimated using the full covariance matrix.  The cell esds are taken
 into account individually in the estimation of esds in distances, angles
 and torsion angles; correlations between esds in cell parameters are only
 used when they are defined by crystal symmetry.  An approximate (isotropic)
 treatment of cell esds is used for estimating esds involving l.s. planes.
;
loop_
  _geom_bond_atom_site_label_1
  _geom_bond_atom_site_label_2
  _geom_bond_distance
  _geom_bond_site_symmetry_2
  _geom_bond_publ_flag
 I15 C4 2.1014(19) . ?
 O10 C9 1.229(2) . ?
 N8 H8 0.8800 . ?
 N8 C1 1.402(2) . ?
 N8 C9 1.352(2) . ?
 C1 C2 1.405(2) . ?
 C1 C6 1.406(2) . ?
 C2 C3 1.396(3) . ?
 C2 C12 1.524(3) . ?
 C3 H3 0.9500 . ?
 C3 C4 1.385(3) . ?
 C4 C5 1.387(3) . ?
 C5 H5 0.9500 . ?
 C5 C6 1.390(3) . ?
 C6 C7 1.507(3) . ?
 C7 H7A 0.9800 . ?
 C7 H7B 0.9800 . ?
 C7 H7C 0.9800 . ?
 C9 C11 1.505(3) . ?
 C11 H11A 0.9900 . ?
 C11 H11B 0.9900 . ?
 C11 C12 1.535(3) . ?
 C12 C13 1.534(3) . ?
 C12 C14 1.537(3) . ?
 C13 H13A 0.9800 . ?
 C13 H13B 0.9800 . ?
 C13 H13C 0.9800 . ?
 C14 H14A 0.9800 . ?
 C14 H14B 0.9800 . ?
 C14 H14C 0.9800 . ?

loop_
  _geom_angle_atom_site_label_1
  _geom_angle_atom_site_label_2
  _geom_angle_atom_site_label_3
  _geom_angle
  _geom_angle_site_symmetry_1
  _geom_angle_site_symmetry_3
  _geom_angle_publ_flag
 C1 N8 H8 118.4 . . ?
 C9 N8 H8 118.4 . . ?
 C9 N8 C1 123.21(15) . . ?
 N8 C1 C2 119.50(15) . . ?
 N8 C1 C6 119.15(16) . . ?
 C2 C1 C6 121.35(17) . . ?
 C1 C2 C12 118.61(16) . . ?
 C3 C2 C1 118.91(16) . . ?
 C3 C2 C12 122.47(16) . . ?
 C2 C3 H3 120.2 . . ?
 C4 C3 C2 119.66(17) . . ?
 C4 C3 H3 120.2 . . ?
 C3 C4 I15 120.21(14) . . ?
 C3 C4 C5 121.17(17) . . ?
 C5 C4 I15 118.62(13) . . ?
 C4 C5 H5 119.7 . . ?
 C4 C5 C6 120.65(17) . . ?
 C6 C5 H5 119.7 . . ?
 C1 C6 C7 121.65(17) . . ?
 C5 C6 C1 118.13(17) . . ?
 C5 C6 C7 120.21(17) . . ?
 C6 C7 H7A 109.5 . . ?
 C6 C7 H7B 109.5 . . ?
 C6 C7 H7C 109.5 . . ?
 H7A C7 H7B 109.5 . . ?
 H7A C7 H7C 109.5 . . ?
 H7B C7 H7C 109.5 . . ?
 O10 C9 N8 122.47(18) . . ?
 O10 C9 C11 122.71(18) . . ?
 N8 C9 C11 114.81(16) . . ?
 C9 C11 H11A 109.2 . . ?
 C9 C11 H11B 109.2 . . ?
 C9 C11 C12 111.85(16) . . ?
 H11A C11 H11B 107.9 . . ?
 C12 C11 H11A 109.2 . . ?
 C12 C11 H11B 109.2 . . ?
 C2 C12 C11 106.56(15) . . ?
 C2 C12 C13 113.05(15) . . ?
 C2 C12 C14 109.35(16) . . ?
 C11 C12 C14 110.19(16) . . ?
 C13 C12 C11 108.60(16) . . ?
 C13 C12 C14 109.05(17) . . ?
 C12 C13 H13A 109.5 . . ?
 C12 C13 H13B 109.5 . . ?
 C12 C13 H13C 109.5 . . ?
 H13A C13 H13B 109.5 . . ?
 H13A C13 H13C 109.5 . . ?
 H13B C13 H13C 109.5 . . ?
 C12 C14 H14A 109.5 . . ?
 C12 C14 H14B 109.5 . . ?
 C12 C14 H14C 109.5 . . ?
 H14A C14 H14B 109.5 . . ?
 H14A C14 H14C 109.5 . . ?
 H14B C14 H14C 109.5 . . ?

loop_
  _geom_torsion_atom_site_label_1
  _geom_torsion_atom_site_label_2
  _geom_torsion_atom_site_label_3
  _geom_torsion_atom_site_label_4
  _geom_torsion
  _geom_torsion_site_symmetry_1
  _geom_torsion_site_symmetry_2
  _geom_torsion_site_symmetry_3
  _geom_torsion_site_symmetry_4
  _geom_torsion_publ_flag
 I15 C4 C5 C6 -178.04(14) . . . . ?
 O10 C9 C11 C12 -137.6(2) . . . . ?
 N8 C1 C2 C3 -176.52(18) . . . . ?
 N8 C1 C2 C12 2.5(3) . . . . ?
 N8 C1 C6 C5 176.61(18) . . . . ?
 N8 C1 C6 C7 -3.8(3) . . . . ?
 N8 C9 C11 C12 43.7(2) . . . . ?
 C1 N8 C9 O10 176.9(2) . . . . ?
 C1 N8 C9 C11 -4.3(3) . . . . ?
 C1 C2 C3 C4 -0.9(3) . . . . ?
 C1 C2 C12 C11 33.9(2) . . . . ?
 C1 C2 C12 C13 153.15(18) . . . . ?
 C1 C2 C12 C14 -85.2(2) . . . . ?
 C2 C1 C6 C5 -3.7(3) . . . . ?
 C2 C1 C6 C7 175.90(19) . . . . ?
 C2 C3 C4 I15 178.13(14) . . . . ?
 C2 C3 C4 C5 -2.0(3) . . . . ?
 C3 C2 C12 C11 -147.12(18) . . . . ?
 C3 C2 C12 C13 -27.9(3) . . . . ?
 C3 C2 C12 C14 93.8(2) . . . . ?
 C3 C4 C5 C6 2.1(3) . . . . ?
 C4 C5 C6 C1 0.8(3) . . . . ?
 C4 C5 C6 C7 -178.85(18) . . . . ?
 C6 C1 C2 C3 3.8(3) . . . . ?
 C6 C1 C2 C12 -177.22(18) . . . . ?
 C9 N8 C1 C2 -20.0(3) . . . . ?
 C9 N8 C1 C6 159.70(19) . . . . ?
 C9 C11 C12 C2 -56.1(2) . . . . ?
 C9 C11 C12 C13 -178.15(16) . . . . ?
 C9 C11 C12 C14 62.5(2) . . . . ?
 C12 C2 C3 C4 -179.87(18) . . . . ?

_shelx_res_file
;
TITL mo_dc113face_a.res in P2(1)/c
REM Old TITL mo_DC113Face in P21/c #14
REM SHELXT solution in P2(1)/c
REM R1 0.102, Rweak 0.002, Alpha 0.030, Orientation as input
REM Formula found by SHELXT: C12 N O I
CELL 0.71073 10.5231 12.4625 9.6181 90 107.523 90
ZERR 4 0.0009 0.0011 0.0008 0 0.002 0
LATT 1
SYMM -X,0.5+Y,0.5-Z
SFAC C H I N O
UNIT 48 56 4 4 4

L.S. 10 0 0
PLAN  20
TEMP -273.15
BOND $H
LIST 6
MORE -1
CONF
fmap 2 53
acta 52
REM <olex2.extras>
REM <HklSrc "%./mo_DC113Face.hkl">
REM </olex2.extras>

WGHT    0.102900    0.242300
FVAR       0.31547
I15   3    0.711256    0.244782    0.526757    11.00000    0.01940    0.02864 =
         0.02573   -0.00315    0.00251    0.00687
O10   5   -0.034317    0.535480    0.316448    11.00000    0.02242    0.03660 =
         0.02337    0.00371    0.00850    0.01131
N8    4    0.160616    0.465077    0.455966    11.00000    0.01939    0.02464 =
         0.01604    0.00205    0.00754    0.00531
AFIX  43
H8    2    0.134673    0.470306    0.534555    11.00000   -1.20000
AFIX   0
C1    1    0.286057    0.420370    0.469657    11.00000    0.01684    0.01759 =
         0.01627    0.00110    0.00627    0.00052
C2    1    0.313610    0.379852    0.345466    11.00000    0.01801    0.01671 =
         0.01511   -0.00056    0.00486   -0.00026
C3    1    0.436199    0.330251    0.361850    11.00000    0.01920    0.01949 =
         0.01743   -0.00201    0.00579    0.00116
AFIX  43
H3    2    0.456192    0.301424    0.279409    11.00000   -1.20000
AFIX   0
C4    1    0.528535    0.323283    0.498931    11.00000    0.01665    0.01840 =
         0.02144    0.00091    0.00527    0.00126
C5    1    0.503156    0.367660    0.620114    11.00000    0.01753    0.02038 =
         0.01712    0.00201    0.00361   -0.00098
AFIX  43
H5    2    0.569169    0.363960    0.712496    11.00000   -1.20000
AFIX   0
C6    1    0.382049    0.417511    0.607729    11.00000    0.01812    0.02024 =
         0.01592    0.00025    0.00636   -0.00140
C7    1    0.356481    0.467310    0.739590    11.00000    0.02209    0.03418 =
         0.01629   -0.00446    0.00618    0.00033
AFIX 137
H7A   2    0.334308    0.543351    0.720505    11.00000   -1.50000
H7B   2    0.436499    0.460663    0.823724    11.00000   -1.50000
H7C   2    0.282011    0.430297    0.760281    11.00000   -1.50000
AFIX   0
C9    1    0.077556    0.500549    0.327917    11.00000    0.02022    0.02223 =
         0.01713    0.00138    0.00557    0.00284
C11   1    0.133922    0.496135    0.201579    11.00000    0.02156    0.02407 =
         0.01496    0.00229    0.00528    0.00453
AFIX  23
H11A  2    0.196476    0.556705    0.208934    11.00000   -1.20000
H11B  2    0.060628    0.504273    0.109345    11.00000   -1.20000
AFIX   0
C12   1    0.207282    0.390147    0.198063    11.00000    0.01650    0.02288 =
         0.01587   -0.00066    0.00514    0.00077
C13   1    0.265428    0.393544    0.069771    11.00000    0.02352    0.03530 =
         0.01761   -0.00127    0.00836    0.00473
AFIX 137
H13A  2    0.329470    0.452669    0.083906    11.00000   -1.50000
H13B  2    0.193355    0.404580   -0.021223    11.00000   -1.50000
H13C  2    0.310606    0.325555    0.064677    11.00000   -1.50000
AFIX   0
C14   1    0.109958    0.295266    0.176984    11.00000    0.02377    0.02843 =
         0.02787   -0.00510    0.00480   -0.00540
AFIX 137
H14A  2    0.157796    0.228134    0.174736    11.00000   -1.50000
H14B  2    0.038559    0.303943    0.084862    11.00000   -1.50000
H14C  2    0.071475    0.293235    0.257918    11.00000   -1.50000
AFIX   0
HKLF 4

REM  mo_dc113face_a.res in P2(1)/c
REM R1 =  0.0532 for    3899 Fo > 4sig(Fo)  and  0.0570 for all    4392 data
REM    139 parameters refined using      0 restraints

END

WGHT      0.1029      0.2423

REM Highest difference peak  2.722,  deepest hole -0.908,  1-sigma level  0.266
Q1    1   0.7361  0.2468  0.5966  11.00000  0.05    2.72
Q2    1   0.6977  0.2522  0.4664  11.00000  0.05    2.50
Q3    1   0.7801  0.2435  0.5286  11.00000  0.05    2.04
Q4    1   0.6396  0.2458  0.5238  11.00000  0.05    1.93
Q5    1   0.6015  0.3204  0.5228  11.00000  0.05    0.89
Q6    1   0.6032  0.2163  0.3991  11.00000  0.05    0.89
Q7    1   0.8130  0.2620  0.6496  11.00000  0.05    0.88
Q8    1   0.7067  0.3161  0.6341  11.00000  0.05    0.85
Q9    1   0.6035  0.2784  0.3989  11.00000  0.05    0.85
Q10   1   0.6235  0.3170  0.4227  11.00000  0.05    0.81
Q11   1   0.1419  0.4786  0.3916  11.00000  0.05    0.80
Q12   1   0.3150  0.3830  0.4260  11.00000  0.05    0.79
Q13   1   0.6352  0.3384  0.4432  11.00000  0.05    0.78
Q14   1   0.3977  0.3605  0.3732  11.00000  0.05    0.77
Q15   1   0.0157  0.5147  0.3150  11.00000  0.05    0.76
Q16   1   0.8561  0.2454  0.4168  11.00000  0.05    0.75
Q17   1   0.8005  0.1800  0.6444  11.00000  0.05    0.75
Q18   1   0.1475  0.4343  0.1823  11.00000  0.05    0.74
Q19   1   0.7896  0.3224  0.6403  11.00000  0.05    0.74
Q20   1   0.5138  0.3268  0.4197  11.00000  0.05    0.73
;
_shelx_res_checksum               19841
_shelx_hkl_file
;
   0   0  -1    0.10    0.10
   0   0  -2 2733.43  231.48
   0   0   2 2322.67  231.28
   0   0   2 2662.73  231.08
   0   0  -2 2704.13  231.18
   0   0  -2 2421.16  231.38
   0   0   2 2573.24  231.48
   0   0   3    0.20    0.20
   0   0  -3    0.70    0.10
   0   0  -4 1064.19   96.19
   0   0   4 1008.10   96.09
   0   0   4 1043.50   96.19
   0   0  -4 1157.48   96.19
   0   0  -5    0.10    0.30
   0   0   5    0.20    0.40
   0   0  -5    0.60    0.40
   0   0   5    0.20    0.20
   0   0   5   -0.20    0.20
   0   0  -6  830.92   76.79
   0   0   6  845.22   76.89
   0   0   6  756.92   76.79
   0   0   6  885.01   76.69
   0   0  -6  856.51   76.69
   0   0  -6  938.41   76.89
   0   0   7    0.40    0.30
   0   0  -7   -0.50    0.50
   0   0   7   -0.40    0.50
   0   0  -7   -0.20    0.20
   0   0   8    5.50    1.00
   0   0   8    5.30    0.80
   0   0  -8    5.90    1.10
   0   0  -8    5.10    0.70
   0   0  -9    0.20    0.80
   0   0   9    0.10    0.50
   0   0   9    0.00    0.70
   0   0  -9    0.20    0.40
   0   0 -10    1.90    0.50
   0   0  10    1.70    0.80
   0   0 -10    2.50    1.10
   0   0 -11    0.70    1.20
   0   0 -12   35.20    4.80
   0   0  12   44.60    4.60
   0   0  13    0.60    1.40
   0   0 -13   -2.90    1.60
   0   1   1  650.33   57.39
   0   1  -1  599.84   57.49
   0   1   1  682.43   57.49
   0   1   1  630.24   57.39
   0   1  -1  592.44   57.39
   0  -1   1  611.34   57.49
   0  -1   1  705.73   57.39
   0  -1   1  631.04   57.49
   0   1  -2  956.70   87.79
   0   1  -2  869.81   87.89
   0   1   2 1076.59   87.99
   0   1   2  977.50   87.79
   0  -1  -2  858.81   87.79
   0  -1  -2  988.00   87.79
   0  -1  -2 1048.50   87.89
   0  -1   2 1030.60   87.99
   0   1   3   32.30    3.20
   0   1   3   35.30    3.20
   0   1  -3   31.60    3.10
   0   1   3   34.40    3.10
   0   1  -3   33.30    3.20
   0  -1   3   34.90    3.20
   0  -1   3   34.60    3.10
   0  -1  -3   33.80    3.10
   0  -1  -3   34.30    3.20
   0  -1   3   34.00    3.10
   0   1  -4  657.83   64.39
   0   1   4  748.73   64.39
   0   1  -4  793.82   64.29
   0  -1  -4  793.82   64.29
   0  -1  -4  677.73   64.39
   0  -1  -4  612.14   64.29
   0   1   5    2.10    0.30
   0   1   5    1.40    0.40
   0   1  -5    1.50    0.50
   0   1  -5    2.40    0.50
   0   1  -5    2.60    0.30
   0   1   5    1.00    0.40
   0  -1   5    2.50    0.50
   0  -1   5    1.00    0.40
   0  -1   5    1.90    0.30
   0  -1  -5    2.20    0.50
   0  -1  -5    2.30    0.30
   0  -1  -5    1.50    0.50
   0   1  -6 1238.28  100.49
   0   1  -6 1160.18  100.19
   0   1   6 1132.09  100.39
   0   1  -6 1061.99  100.39
   0   1   6 1037.40  100.19
   0  -1  -6 1249.97  100.49
   0  -1   6 1053.39  100.39
   0  -1  -6 1096.99  100.39
   0  -1   6  989.80  100.29
   0  -1  -6 1123.29  100.19
   0   1   7   47.70    4.90
   0   1  -7   48.30    4.90
   0   1  -7   52.09    4.60
   0   1   7   53.49    4.60
   0  -1  -7   51.19    4.70
   0  -1  -7   48.60    4.90
   0  -1   7   54.59    4.60
   0  -1   7   42.40    4.90
   0   1  -8  488.75   40.70
   0   1   8  464.05   40.70
   0  -1  -8  459.85   40.70
   0  -1   8  455.95   40.70
   0  -1  -8  377.46   40.40
   0   1  -9    1.10    0.90
   0   1   9    1.10    0.50
   0   1   9   -0.10    0.60
   0   1  -9    0.90    0.30
   0  -1  -9   -0.30    0.70
   0  -1   9    0.80    0.70
   0   1 -10  309.27   26.20
   0   1  10  280.57   26.10
   0  -1 -10  287.67   26.20
   0  -1  10  263.97   26.10
   0   1 -11    2.90    1.40
   0  -1 -11    2.80    1.20
   0  -1  11    1.80    1.10
   0   1 -12  190.58   17.60
   0   1  12  221.58   17.60
   0  -1 -12  178.48   17.60
   0  -1  12  163.08   17.50
   0   1 -13   -1.90    1.80
   0   1  13    1.10    1.50
   0  -1  13   -0.10    1.40
   0  -1 -13   -0.60    1.80
   0   2   0 1083.69   91.99
   0   2   0 1008.50   92.09
   0   2   0 1042.00   91.99
   0  -2   0 1033.10   91.89
   0  -2   0  978.60   91.99
   0  -2   0  983.00   91.99
   0   2   1   83.69    8.40
   0   2  -1   88.09    8.50
   0   2   1   97.59    8.50
   0   2  -1  101.19    8.50
   0   2   1   91.39    8.50
   0  -2   1   94.29    8.50
   0  -2  -1   97.59    8.50
   0  -2   1   82.09    8.50
   0  -2   1   97.59    8.50
   0  -2  -1  103.79    8.40
   0  -2  -1   94.19    8.50
   0   2  -2 5277.17  445.46
   0   2   2 4885.51  445.16
   0   2  -2 4914.61  445.26
   0   2   2 5358.96  445.46
   0   2  -2 4900.71  444.96
   0  -2  -2 5307.67  445.26
   0  -2   2 4398.56  445.36
   0  -2   2 5148.68  445.36
   0  -2  -2 4562.04  445.16
   0  -2   2 4732.03  444.96
   0   2  -3   58.29    4.90
   0   2  -3   58.59    4.90
   0   2  -3   50.69    4.90
   0   2  -3   44.90    5.00
   0   2   3   54.19    4.90
   0  -2   3   55.09    5.00
   0  -2  -3   53.79    4.90
   0  -2  -3   58.89    5.00
   0  -2  -3   53.09    5.00
   0  -2   3   47.30    4.90
   0   2   4  962.60   84.79
   0   2  -4 1079.79   84.79
   0   2   4  987.10   84.89
   0   2   4  940.41   84.89
   0   2  -4  854.81   84.89
   0  -2   4  813.02   84.89
   0  -2  -4  974.40   84.89
   0  -2  -4  929.61   84.79
   0   2   5   18.90    1.70
   0   2  -5   18.30    1.80
   0   2  -5   14.90    1.90
   0   2   5   15.60    1.80
   0  -2   5   19.00    1.90
   0  -2  -5   16.10    1.80
   0  -2  -5   16.20    1.80
   0  -2  -5   18.80    1.70
   0   2  -6  401.06   35.90
   0   2  -6  414.66   35.70
   0   2   6  399.66   35.90
   0   2   6  391.46   35.70
   0  -2  -6  380.86   35.90
   0  -2   6  392.86   35.90
   0  -2  -6  392.06   35.70
   0   2   7  110.19   10.10
   0   2  -7  120.09   10.10
   0   2  -7   96.09    9.80
   0   2   7   92.69    9.90
   0   2  -7  107.39    9.80
   0  -2  -7  113.89   10.10
   0  -2   7  127.79   10.20
   0   2   8  123.79   10.70
   0   2  -8  125.79   10.70
   0  -2  -8  100.99   10.50
   0  -2  -8  129.89   10.80
   0  -2   8   97.19   10.70
   0   2  -9    4.50    1.00
   0   2   9    3.80    0.70
   0   2   9    2.80    0.90
   0  -2   9    3.50    1.00
   0  -2  -9    2.50    0.60
   0  -2  -9    4.00    1.00
   0   2  10    4.20    1.00
   0   2 -10    3.10    1.10
   0  -2 -10    3.10    1.10
   0  -2 -10    2.00    0.70
   0  -2  10    2.40    1.00
   0   2  11    1.30    1.00
   0   2 -11    1.60    1.10
   0  -2 -11    2.10    1.20
   0  -2  11    1.00    1.00
   0   2  12   19.90    2.80
   0   2 -12   16.70    2.50
   0  -2  12   16.20    2.50
   0  -2 -12   14.40    2.50
   0   2 -13    2.10    1.80
   0   2  13    3.60    1.60
   0  -2 -13    0.10    1.80
   0  -2  13    1.10    1.50
   0   3   0    0.70    0.10
   0  -3   0    0.50    0.10
   0  -3   0    0.90    0.20
   0   3  -1   31.40    2.90
   0   3  -1   34.80    3.00
   0   3  -1   32.60    3.00
   0  -3  -1   36.60    3.00
   0  -3   1   32.10    3.00
   0  -3   1   27.40    3.00
   0  -3   1   30.60    2.90
   0  -3  -1   32.10    3.00
   0   3   2  107.79    9.40
   0   3   2   86.89    9.40
   0   3   2  108.39    9.40
   0  -3   2   99.19    9.40
   0  -3   2   92.29    9.40
   0  -3  -2  118.79    9.40
   0  -3  -2  111.79    9.40
   0  -3   2  104.09    9.40
   0   3   3    9.90    1.10
   0   3  -3    9.90    1.00
   0   3  -3   11.10    1.10
   0   3  -3    9.20    1.10
   0   3   3   11.20    1.00
   0   3   3   11.30    1.10
   0  -3   3    8.80    1.10
   0  -3   3    8.80    1.10
   0  -3  -3   10.00    1.10
   0  -3  -3   12.40    1.10
   0   3  -4  849.41   76.99
   0   3   4  887.01   76.99
   0   3  -4  744.13   77.09
   0   3   4  731.73   76.99
   0   3  -4  902.71   76.99
   0   3   4  802.12   77.09
   0  -3   4  943.61   77.19
   0  -3  -4  984.80   76.99
   0   3  -5   46.10    4.90
   0   3  -5   52.29    4.70
   0   3  -5   52.99    4.90
   0   3   5   45.00    4.90
   0  -3  -5   54.29    4.80
   0  -3  -5   51.59    4.90
   0  -3   5   57.59    5.00
   0  -3  -5   54.59    4.90
   0   3  -6 1018.00   92.19
   0   3   6 1051.69   92.19
   0   3  -6 1043.60   91.99
   0  -3  -6 1018.40   92.19
   0  -3   6  982.00   92.19
   0   3   7   36.80    3.80
   0   3  -7   38.20    3.80
   0  -3  -7   37.10    3.80
   0  -3   7   38.90    3.90
   0  -3  -7   40.70    3.70
   0   3  -8 1145.99  105.19
   0  -3   8 1204.68  105.29
   0  -3  -8 1120.09  105.19
   0  -3  -8 1194.78  104.99
   0   3  -9   44.10    4.60
   0   3   9   50.89    4.30
   0   3   9   46.80    4.50
   0  -3  -9   44.10    4.60
   0  -3   9   38.20    4.60
   0   3  10  377.66   30.60
   0   3 -10  338.07   30.60
   0  -3  10  381.06   30.70
   0  -3 -10  287.47   30.30
   0  -3 -10  295.27   30.60
   0   3 -11    1.10    1.10
   0   3  11   -0.10    1.00
   0  -3 -11    0.90    0.80
   0  -3 -11   -0.70    1.10
   0  -3  11   -0.10    1.00
   0   3  12   82.09    8.70
   0   3 -12  106.39    8.90
   0  -3  12   80.89    8.70
   0   3  13    3.70    1.70
   0   3 -13    4.60    1.90
   0  -3  13    3.90    1.70
   0   4   0 3520.25  291.77
   0   4   0 3112.89  291.47
   0   4   0 3484.25  291.97
   0  -4   0 2865.71  291.77
   0  -4   0 2994.80  291.67
   0  -4   0 3465.15  291.47
   0   4   1  298.87   27.00
   0   4  -1  286.37   27.00
   0   4  -1  297.27   27.00
   0   4  -1  325.07   27.00
   0   4   1  314.17   27.10
   0  -4  -1  296.57   27.00
   0  -4   1  306.87   27.00
   0  -4   1  297.37   27.00
   0  -4   1  267.77   27.00
   0  -4  -1  306.17   27.10
   0   4  -2 1455.75  124.69
   0   4   2 1529.75  124.69
   0   4  -2 1169.08  124.69
   0   4   2 1346.17  124.69
   0   4  -2 1332.27  124.69
   0  -4   2 1460.65  124.79
   0  -4   2 1404.16  124.69
   0   4   3    7.50    0.90
   0   4  -3    7.90    0.80
   0   4   3    5.80    0.80
   0   4   3    8.20    0.80
   0   4  -3    7.00    0.90
   0  -4   3    7.20    0.80
   0  -4   3    6.60    0.90
   0  -4  -3    8.90    0.80
   0  -4  -3    6.30    0.80
   0  -4   3    8.20    0.90
   0   4   4 1360.76  126.89
   0   4  -4 1404.86  127.09
   0   4  -4 1397.96  126.99
   0   4   4 1394.06  126.99
   0  -4   4 1281.37  126.99
   0  -4   4 1627.84  127.09
   0   4  -5   14.30    1.60
   0   4  -5   14.80    1.40
   0   4  -5   14.90    1.70
   0   4   5   17.20    1.70
   0   4  -5   15.90    1.40
   0   4   5   15.30    1.50
   0  -4   5   15.20    1.60
   0  -4   5   15.00    1.70
   0  -4  -5   12.20    1.60
   0  -4  -5   12.60    1.50
   0   4   6  376.26   33.10
   0   4  -6  375.16   33.20
   0  -4   6  370.96   33.20
   0  -4  -6  402.46   33.10
   0  -4  -6  305.67   33.10
   0   4  -7    0.00    0.50
   0   4  -7    0.00    0.20
   0   4   7    0.10    0.40
   0   4   7    0.50    0.50
   0  -4  -7    0.50    0.40
   0  -4   7   -0.30    0.60
   0  -4  -7   -0.10    0.70
   0   4   8    0.40    0.60
   0   4   8    2.90    0.70
   0   4  -8    0.90    0.70
   0  -4   8    0.30    0.70
   0  -4  -8    1.40    0.50
   0   4   9    5.50    1.10
   0   4  -9    5.30    1.10
   0  -4   9    2.70    1.00
   0  -4  -9    5.10    0.90
   0   4 -10    1.50    1.00
   0   4  10    4.00    1.00
   0  -4 -10    3.00    0.90
   0  -4  10    3.00    1.00
   0   4 -11    1.10    1.20
   0   4  11    1.30    1.10
   0  -4  11   -0.50    0.90
   0  -4 -11    0.70    0.90
   0   4 -12   18.00    2.40
   0   4  12   13.70    2.20
   0  -4  12   10.40    2.10
   0   4  13    3.70    1.70
   0   4 -13    3.80    1.80
   0  -4  13    6.70    1.80
   0   5   0    0.40    0.10
   0   5   0    0.00    0.20
   0   5   0    0.10    0.20
   0  -5   0    0.40    0.20
   0  -5   0    0.50    0.10
   0  -5   0    0.40    0.30
   0   5  -1   33.40    2.90
   0   5   1   25.70    2.80
   0  -5   1   32.20    2.90
   0  -5  -1   32.30    2.90
   0  -5   1   28.90    2.90
   0   5  -2  413.36   32.40
   0   5  -2  383.86   32.30
   0   5   2  305.27   32.30
   0  -5   2  389.56   32.40
   0  -5   2  379.76   32.30
   0  -5  -2  325.77   32.40
   0  -5   2  309.17   32.30
   0   5   3    5.70    0.90
   0   5  -3    5.80    0.70
   0   5  -3    5.90    0.80
   0   5  -3    5.20    0.80
   0   5   3    5.00    0.70
   0   5   3    5.80    0.60
   0  -5   3    5.80    0.70
   0  -5   3    4.90    0.80
   0  -5  -3    6.50    0.60
   0   5  -4  181.78   16.80
   0   5   4  178.58   16.80
   0   5  -4  197.08   16.80
   0   5   4  174.38   16.90
   0   5   4  177.78   16.90
   0  -5  -4  199.98   16.80
   0  -5   4  187.68   16.90
   0   5  -5    2.40    0.50
   0   5  -5    3.10    0.40
   0   5   5    2.90    0.50
   0   5  -5    4.10    0.90
   0   5   5    2.00    0.50
   0   5  -5    3.20    0.40
   0  -5   5    1.80    0.60
   0  -5  -5    2.90    0.60
   0  -5  -5    3.10    0.60
   0   5   6  516.25   47.60
   0   5   6  525.85   47.60
   0   5  -6  486.25   47.70
   0   5  -6  569.74   47.50
   0  -5   6  523.15   47.80
   0  -5  -6  545.25   47.70
   0   5  -7    8.50    1.20
   0   5  -7    6.10    0.80
   0   5   7    8.50    1.10
   0   5  -7    6.60    0.70
   0  -5  -7    8.90    1.20
   0  -5  -7    9.00    1.30
   0  -5   7    7.20    1.20
   0   5   8  476.65   45.10
   0   5  -8  491.65   45.10
   0  -5  -8  526.85   45.10
   0   5  -9   -0.70    0.60
   0   5   9    1.40    0.70
   0  -5   9    1.40    0.90
   0  -5  -9    0.70    0.70
   0   5 -10  220.08   17.70
   0   5  10  206.68   17.60
   0  -5  10  160.58   17.60
   0  -5 -10  175.48   17.40
   0   5  11    3.50    1.30
   0   5 -11    2.90    1.30
   0  -5 -11    4.90    1.20
   0  -5  11    4.90    1.50
   0   5  12   71.69    7.30
   0   5 -12   73.69    7.50
   0  -5  12   75.59    7.50
   0   5  13    8.90    2.20
   0   5 -13    9.30    2.10
   0  -5  13   14.50    2.40
   0   6  -1   19.60    2.10
   0   6   1   26.10    2.20
   0   6   1   20.60    2.10
   0  -6   1   19.90    2.10
   0  -6  -1   19.40    2.20
   0  -6   1   25.50    2.10
   0  -6   1   20.50    2.20
   0   6   2 1813.82  179.38
   0   6  -2 2130.89  179.38
   0  -6   2 2052.59  179.58
   0  -6  -2 1749.32  179.38
   0  -6  -2 2225.58  179.68
   0   6   3   91.29    9.70
   0   6   3  109.69    9.60
   0   6  -3  115.59    9.80
   0   6  -3  100.39    9.70
   0   6  -3  126.29    9.80
   0  -6   3  115.89    9.70
   0  -6   3   93.39    9.80
   0  -6  -3  101.09    9.80
   0   6  -4  688.33   70.89
   0   6  -4  742.53   70.99
   0   6   4  804.52   70.89
   0   6   4  846.42   70.99
   0   6   4  795.22   70.79
   0   6   4  755.22   70.99
   0  -6  -4  846.62   70.89
   0  -6   4  808.22   70.99
   0  -6  -4  774.82   70.99
   0  -6   4  811.62   70.99
   0   6   5   54.79    5.00
   0   6   5   53.79    4.70
   0   6  -5   48.80    4.80
   0  -6  -5   44.10    4.80
   0  -6   5   51.69    4.90
   0  -6  -5   55.19    4.90
   0   6   6   97.39    8.40
   0   6  -6   93.39    8.00
   0   6  -6   88.19    8.20
   0  -6   6   72.89    8.30
   0  -6  -6   94.49    8.20
   0  -6  -6   83.79    8.20
   0   6  -7   20.90    2.30
   0   6   7   20.80    2.20
   0   6   7   22.50    2.60
   0   6  -7   18.60    1.90
   0  -6   7   22.50    2.50
   0  -6  -7   20.90    2.40
   0   6  -8   17.90    2.10
   0  -6   8   14.20    2.00
   0  -6  -8   14.50    1.90
   0   6   9   34.00    3.40
   0   6  -9   39.90    3.60
   0  -6  -9   28.40    3.40
   0  -6   9   27.30    3.50
   0   6  10    2.70    1.00
   0  -6 -10    2.00    0.90
   0  -6  10    1.80    1.00
   0   6 -11   31.30    3.50
   0   6  11   24.40    3.20
   0  -6  11   21.80    3.30
   0  -6 -11   26.90    3.20
   0   6  12   20.60    3.60
   0   6  12   26.20    3.50
   0   6 -12   23.50    3.60
   0  -6  12   27.40    3.50
   0   6  13   -1.80    1.90
   0   6  13    0.10    2.60
   0   6 -13   -0.30    1.70
   0  -6  13    1.50    1.80
   0   7   0    0.30    0.30
   0   7   0    0.20    0.30
   0  -7   0   -0.20    0.40
   0  -7   0    0.20    0.30
   0  -7   0    0.90    0.20
   0  -7   1   80.89    7.80
   0  -7   1  101.59    7.90
   0  -7   1   73.09    7.90
   0  -7  -1   75.79    8.00
   0  -7  -1   98.19    7.90
   0   7  -2  271.77   24.00
   0   7   2  248.38   24.00
   0   7   2  237.48   24.10
   0  -7  -2  251.77   24.00
   0  -7   2  293.07   24.10
   0  -7  -2  290.37   24.20
   0  -7   2  264.67   24.00
   0   7  -3    0.10    0.30
   0   7   3   -0.20    0.40
   0   7   3    0.40    0.40
   0   7  -3    0.40    0.40
   0   7  -3    0.40    0.30
   0  -7  -3    0.50    0.30
   0  -7   3   -0.10    0.40
   0  -7   3    0.20    0.40
   0   7  -4  768.92   65.09
   0   7  -4  635.64   65.09
   0   7   4  751.42   64.89
   0   7  -4  600.84   64.89
   0  -7   4  740.53   64.89
   0  -7  -4  751.62   65.09
   0  -7   4  801.02   65.09
   0   7  -5   10.50    1.30
   0   7  -5   10.30    1.50
   0   7   5   15.30    1.30
   0   7   5   14.60    1.70
   0  -7  -5   11.80    1.40
   0  -7   5   14.60    1.70
   0  -7  -5   13.90    1.60
   0   7  -6  358.26   36.40
   0   7  -6  340.97   36.40
   0   7  -6  439.36   36.60
   0   7   6  403.76   36.40
   0  -7  -6  419.36   36.50
   0  -7  -6  466.45   36.60
   0   7  -7   15.80    1.70
   0   7   7   20.30    1.90
   0   7  -7   15.60    1.70
   0   7  -7   16.40    2.00
   0   7   7   15.80    2.30
   0  -7   7   20.40    2.30
   0  -7  -7   18.00    2.20
   0  -7  -7   13.70    2.00
   0   7   8  262.87   23.20
   0   7  -8  263.27   22.90
   0  -7   8  243.38   23.00
   0  -7  -8  234.28   22.80
   0   7   9   15.00    2.30
   0   7  -9   10.70    1.80
   0   7   9   15.50    1.90
   0  -7   9   12.30    2.00
   0  -7  -9   12.40    1.80
   0   7  10  209.78   20.10
   0   7  10  208.38   19.60
   0  -7  10  200.98   19.80
   0  -7 -10  235.38   19.70
   0   7  11    0.00    1.20
   0   7 -11    2.30    1.40
   0   7  11   -1.50    1.70
   0  -7 -11    3.20    1.30
   0  -7  11    3.30    1.40
   0   7 -12   59.19    6.40
   0   7  12   68.79    7.30
   0  -7  12   56.69    6.40
   0   8   0 1472.75  140.49
   0   8   0 1486.35  140.39
   0  -8   0 1602.04  140.39
   0  -8   0 1528.95  140.49
   0  -8   0 1797.82  140.39
   0  -8   0 1472.15  140.39
   0   8  -1   66.49    7.40
   0   8  -1   91.69    7.40
   0   8  -1   79.49    7.50
   0  -8   1   90.19    7.60
   0  -8   1   81.59    7.50
   0  -8  -1   75.49    7.50
   0  -8   1   83.59    7.40
   0   8   2  560.04   53.99
   0   8  -2  651.13   53.89
   0   8  -2  600.34   53.99
   0  -8   2  516.35   53.89
   0  -8   2  644.34   53.99
   0  -8  -2  616.74   53.99
   0   8  -3    0.30    0.40
   0   8  -3    1.00    0.40
   0   8   3    0.40    0.50
   0   8  -3    0.00    0.50
   0  -8   3    0.40    0.30
   0  -8  -3    0.50    0.40
   0  -8   3    0.70    0.50
   0   8  -4  391.26   32.80
   0   8  -4  353.66   32.70
   0   8   4  336.47   32.80
   0  -8   4  371.36   32.80
   0  -8   4  338.37   32.60
   0  -8  -4  376.46   32.70
   0   8   5   35.00    3.80
   0   8   5   37.40    3.40
   0   8  -5   33.90    3.60
   0   8  -5   36.70    3.50
   0  -8  -5   38.60    3.60
   0   8  -6  171.38   13.10
   0   8  -6  138.49   12.90
   0   8   6  146.29   13.30
   0  -8  -6  128.89   13.10
   0  -8   6  126.29   13.10
   0   8   7   62.69    6.30
   0   8  -7   57.89    5.80
   0   8  -7   68.99    5.80
   0   8  -7   75.39    6.10
   0  -8   7   56.99    6.10
   0  -8  -7   57.09    6.00
   0   8  -8    1.90    0.80
   0   8  -8    1.10    0.40
   0   8   8    1.00    1.00
   0   8   8    1.40    0.60
   0  -8   8    0.70    0.90
   0  -8  -8    0.50    0.80
   0   8   9    4.10    1.00
   0   8  -9    3.90    1.10
   0  -8  -9    4.80    1.20
   0   8  10    0.50    1.00
   0   8 -10    0.60    1.10
   0   8  10    2.00    1.50
   0  -8  10    0.80    1.10
   0  -8 -10    1.60    1.20
   0   8  11    4.30    2.10
   0   8  11    2.70    1.40
   0   8 -11    2.50    1.40
   0  -8 -11    5.10    1.50
   0  -8  11    1.40    1.40
   0   8 -12   15.10    2.70
   0   8  12   26.00    3.80
   0  -8  12   19.70    2.90
   0   9   0    0.30    0.50
   0  -9   0    0.40    0.40
   0  -9   0    0.80    0.20
   0   9  -1  244.38   21.30
   0   9   1  201.88   21.30
   0  -9   1  234.18   21.20
   0  -9  -1  232.38   21.30
   0  -9   1  256.57   21.20
   0   9  -2   67.39    7.60
   0   9  -2   84.19    7.60
   0   9  -2   90.69    7.70
   0  -9  -2   88.69    7.70
   0  -9   2   83.29    7.60
   0   9  -3   46.90    5.40
   0   9  -3   62.79    5.40
   0   9   3   63.39    5.60
   0   9  -3   49.10    5.40
   0  -9  -3   65.59    5.50
   0  -9   3   66.89    5.50
   0  -9   3   50.79    5.30
   0   9   4  182.28   17.10
   0   9  -4  191.08   16.90
   0  -9  -4  187.58   17.10
   0  -9   4  174.48   16.90
   0  -9   4  197.38   17.10
   0   9  -5   44.60    4.70
   0   9  -5   45.80    4.80
   0   9   5   45.50    5.00
   0  -9   5   59.59    5.00
   0  -9  -5   47.60    4.80
   0  -9   5   56.49    4.70
   0   9   6  288.77   27.00
   0   9  -6  335.47   27.20
   0   9  -6  278.77   27.00
   0   9   6  340.97   27.00
   0   9   6  294.47   27.40
   0  -9   6  280.17   27.20
   0  -9  -6  272.27   27.20
   0   9   7    2.00    1.00
   0   9  -7    2.70    0.80
   0   9   7    2.40    0.60
   0  -9   7    2.60    1.00
   0  -9  -7    1.80    0.90
   0   9  -8  197.38   17.70
   0   9   8  191.78   18.20
   0   9   8  199.88   17.80
   0  -9  -8  192.58   18.00
   0  -9   8  193.78   18.10
   0   9   9    2.10    1.40
   0   9   9    1.00    0.80
   0   9  -9    0.30    1.00
   0  -9  -9    0.20    1.10
   0  -9   9   -1.10    0.90
   0   9 -10  164.88   15.30
   0   9  10  169.98   15.70
   0  -9  10  156.98   15.40
   0   9  11    4.80    2.30
   0   9 -11    0.00    1.30
   0  -9  11    2.10    1.50
   0  -9 -11    2.20    1.50
   0   9  12   93.69    9.00
   0   9 -12   59.69    7.80
   0  -9  12   83.19    8.00
   0  10   0  487.25   41.00
   0 -10   0  384.86   40.80
   0 -10   0  490.85   41.00
   0  10   1    0.60    0.50
   0  10  -1    1.20    0.50
   0 -10   1    0.50    0.50
   0 -10  -1    0.30    0.40
   0 -10   1    1.10    0.40
   0  10  -2  667.33   66.99
   0  10  -2  786.72   67.09
   0  10   2  766.42   67.19
   0 -10   2  754.02   67.09
   0 -10  -2  745.73   67.09
   0  10   3   37.80    3.50
   0  10  -3   33.90    3.30
   0 -10   3   33.70    3.20
   0 -10   3   26.30    3.20
   0 -10  -3   34.40    3.30
   0  10   4  294.07   31.80
   0  10  -4  369.86   31.70
   0 -10   4  346.57   31.60
   0 -10   4  387.66   31.80
   0  10  -5   44.20    4.00
   0  10   5   31.20    4.10
   0  10  -5   44.10    4.00
   0 -10   5   44.30    4.10
   0 -10   5   37.50    3.80
   0  10   6   64.79    5.50
   0  10  -6   52.19    5.20
   0 -10  -6   48.90    5.20
   0 -10   6   48.70    5.20
   0  10   7   40.10    3.80
   0  10  -7   38.90    3.90
   0  10  -7   49.10    4.20
   0 -10   7   37.30    4.20
   0 -10  -7   37.70    4.20
   0  10   8   42.90    5.10
   0 -10   8   54.99    5.00
   0 -10  -8   42.70    4.90
   0  10   9    1.40    1.60
   0  10  -9    1.90    1.10
   0 -10   9    2.30    1.20
   0  10 -10    7.40    1.90
   0  10  10   11.30    2.60
   0 -10  10   11.70    2.10
   0 -10 -10   13.90    2.10
   0  10 -11    3.80    1.70
   0  10  11    5.20    2.30
   0 -10  11    5.40    1.70
   0 -10 -11    4.30    1.80
   0  11   0    1.00    0.60
   0 -11   0    0.20    0.50
   0  11  -1   83.39    7.40
   0  11   1   84.79    7.40
   0 -11   1   71.99    7.20
   0 -11  -1   79.29    7.40
   0 -11   1   68.79    7.20
   0 -11   1   85.39    7.30
   0  11   2    9.70    1.60
   0  11  -2   13.10    1.60
   0 -11  -2   10.30    1.60
   0 -11   2   15.50    1.60
   0  11   3   97.39    8.30
   0  11  -3   77.59    8.10
   0 -11   3   89.69    8.10
   0 -11   3   81.39    8.10
   0 -11  -3   89.99    8.20
   0  11   4  253.97   22.30
   0  11  -4  264.77   22.10
   0 -11   4  241.88   22.00
   0 -11  -4  209.08   22.10
   0  11  -5    9.60    1.50
   0  11   5    6.40    1.40
   0 -11  -5    9.40    1.40
   0 -11   5    9.80    1.30
   0 -11   5   10.10    1.60
   0  11  -6  121.29    9.60
   0  11   6   89.89    9.70
   0 -11   6   92.29    9.50
   0  11  -7   15.30    1.90
   0 -11  -7   17.90    2.40
   0 -11   7   17.20    2.30
   0  11  -8  162.38   14.40
   0  11   8  147.49   14.60
   0 -11  -8  150.18   14.40
   0  11   9   -1.70    1.50
   0  11  -9   -0.40    1.20
   0 -11  -9    1.30    1.30
   0 -11   9    0.00    1.20
   0  11 -10   82.99    8.60
   0  11  10   91.59    9.30
   0 -11  10   82.59    8.70
   0 -11 -10   94.49    8.80
   0  11 -11    0.90    1.70
   0  11  11    1.30    2.40
   0 -11  11    0.90    1.80
   0 -11 -11    2.00    1.70
   0  12   0  353.26   35.30
   0 -12   0  424.26   35.30
   0  12  -1    0.80    0.70
   0  12   1    1.10    0.80
   0 -12   1    1.20    0.70
   0 -12   1    0.90    0.50
   0 -12   1    2.30    0.50
   0 -12  -1    1.80    0.70
   0  12   2  380.86   37.80
   0  12  -2  425.16   37.80
   0 -12   2  458.15   37.80
   0 -12  -2  403.06   37.80
   0  12  -3    5.00    1.00
   0  12   3    3.70    1.00
   0 -12   3    5.50    0.90
   0 -12   3    4.60    1.00
   0 -12  -3    3.90    1.00
   0  12  -4  216.08   19.10
   0  12   4  206.88   19.20
   0 -12   4  216.68   19.10
   0 -12  -4  191.48   19.10
   0  12   5   33.90    4.00
   0  12  -5   45.80    3.90
   0 -12   5   30.90    3.80
   0 -12  -5   37.70    4.00
   0 -12   5   37.30    3.70
   0 -12   6   61.09    6.10
   0  12   7   15.40    2.50
   0  12  -7   16.80    2.40
   0 -12   7   19.10    2.60
   0 -12  -7   18.30    2.50
   0  12   8   17.00    2.80
   0  12  -8   20.30    2.80
   0 -12   8   20.20    3.00
   0 -12  -8   23.10    3.10
   0  12  -9   26.50    3.50
   0  12   9   22.70    3.50
   0 -12   9   26.10    3.50
   0 -12  -9   25.60    3.60
   0  12  10    1.10    2.20
   0  12 -10    2.90    1.60
   0 -12 -10    5.30    1.80
   0 -12  10    5.90    1.90
   0  13   0    1.80    0.80
   0 -13   0    1.00    0.70
   0  13  -1   50.99    4.30
   0  13   1   38.40    4.20
   0 -13   1   46.00    4.20
   0 -13  -1   40.10    4.20
   0 -13   1   36.70    3.90
   0  13   2   18.70    2.30
   0  13  -2   17.20    2.20
   0 -13  -2   19.50    2.30
   0 -13   2   18.10    2.20
   0  13   3   32.10    3.70
   0  13  -3   42.60    3.70
   0 -13   3   35.90    3.60
   0 -13  -3   29.70    3.60
   0 -13   3   33.00    3.50
   0  13   4   59.59    6.20
   0 -13   4   66.79    6.10
   0 -13   4   59.39    5.90
   0  13   5   15.60    2.70
   0  13  -5   19.40    2.40
   0 -13   5   21.10    2.60
   0 -13   5   17.40    2.20
   0 -13  -5   20.90    2.60
   0  13   6  120.79   12.60
   0  13  -6  140.19   12.40
   0 -13   6  134.09   12.50
   0 -13  -6  135.19   12.50
   0  13   7    1.20    1.40
   0  13  -7    0.60    1.00
   0 -13  -7    2.10    1.30
   0 -13   7    1.10    1.20
   0  13   8   45.00    5.90
   0  13  -8   59.19    5.70
   0 -13  -8   53.29    5.80
   0 -13   8   57.69    5.90
   0  13   9   -0.60    1.90
   0  13  -9    0.30    1.40
   0 -13  -9    0.80    1.60
   0 -13   9    1.20    1.50
   0  13  10   47.70    6.30
   0  13 -10   41.00    5.40
   0 -13 -10   51.89    5.70
   0 -13  10   45.00    5.60
   0  14   0  258.17   23.80
   0 -14   0  261.87   23.80
   0  14  -1    0.90    0.80
   0  14   1    1.00    0.80
   0 -14   1    0.20    0.80
   0 -14  -1    0.40    0.70
   0  14  -2  213.08   20.70
   0 -14   2  212.78   20.60
   0 -14  -2  249.78   20.70
   0  14   3   18.80    2.60
   0  14  -3   23.60    2.60
   0 -14  -3   18.90    2.60
   0 -14   3   22.90    2.50
   0 -14   3   16.90    2.40
   0  14   4  114.49   11.60
   0 -14   4  115.79   11.40
   0 -14   4  132.59   11.40
   0 -14  -4  126.49   11.60
   0  14  -5   26.50    3.30
   0  14   5   28.60    3.50
   0 -14  -5   30.10    3.50
   0 -14   5   27.10    3.10
   0 -14   5   32.10    3.40
   0  14  -6   34.00    3.50
   0  14   6   26.00    3.80
   0 -14  -6   27.00    3.60
   0 -14   6   27.80    3.50
   0  14   7   24.50    3.60
   0  14  -7   19.40    3.00
   0 -14  -7   27.20    3.40
   0 -14   7   21.10    3.30
   0  14   8    4.40    2.00
   0  14  -8    7.20    1.60
   0 -14   8    5.90    1.90
   0 -14  -8    6.10    1.80
   0  14   9   33.70    4.90
   0  14  -9   22.40    3.50
   0 -14  -9   34.20    4.40
   0 -14   9   33.40    4.20
   0  15   0   -0.20    1.00
   0 -15   0    0.30    0.80
   0  15   1   23.10    2.90
   0 -15  -1   26.40    2.90
   0  15   2    5.10    1.30
   0  15  -2    4.40    1.10
   0 -15  -2    4.10    1.20
   0 -15   2    5.80    1.20
   0  15  -3   23.70    3.00
   0  15   3   21.60    3.00
   0 -15  -3   23.20    3.00
   0 -15   3   29.70    3.00
   0  15   4   46.00    5.00
   0  15  -4   42.50    4.80
   0 -15   4   45.60    4.80
   0 -15   4   49.99    4.90
   0 -15  -4   50.09    4.90
   0  15  -5   -0.70    1.00
   0  15   5   -1.60    1.20
   0 -15   5   -0.10    1.00
   0 -15  -5    1.00    1.10
   0 -15   5    0.90    1.30
   0  15  -6   79.19    8.30
   0  15   6   91.49    8.70
   0 -15  -6   89.89    8.60
   0  15   7   -0.10    1.60
   0  15  -7   -0.30    1.20
   0 -15  -7    2.40    1.40
   0 -15   7    2.20    1.60
   0  15  -8   53.69    6.70
   0  15   8   67.99    7.40
   0 -15  -8   70.79    7.20
   0 -15   8   73.49    7.00
   0  16   0  100.29   11.30
   0 -16   0  141.39   11.40
   0  16   1    6.20    1.50
   0  16  -1    7.80    1.60
   0 -16  -1    9.70    1.60
   0 -16   1   10.50    1.60
   0  16   2   58.49    6.50
   0 -16  -2   59.69    6.50
   0 -16   2   78.89    6.50
   0  16  -3   26.40    3.30
   0  16   3   28.60    3.40
   0 -16   3   26.10    3.20
   0 -16  -3   24.30    3.30
   0  16  -4   26.70    3.60
   0  16   4   27.40    3.60
   0 -16  -4   35.40    3.80
   0 -16   4   30.80    3.50
   0  16   5    6.20    1.80
   0  16  -5    6.70    1.60
   0 -16  -5    7.40    1.70
   0  16  -6   30.00    4.10
   0  16   6   34.80    4.60
   0 -16  -6   45.30    4.60
   0  16  -7    3.60    1.60
   0  16   7    8.20    2.20
   0 -16  -7    7.70    2.00
   0  17   0    0.60    1.20
   0 -17   0    1.10    1.20
   0  17  -1   20.50    3.20
   0  17   1   26.00    3.30
   0 -17   1   25.40    3.30
   0 -17  -1   24.50    3.20
   0  17  -2   12.30    2.00
   0  17   2   10.60    2.00
   0 -17  -2    8.40    1.80
   0 -17   2   11.80    1.90
   0  17   3   20.50    3.40
   0  17  -3   22.70    3.30
   0 -17   3   26.70    3.40
   0 -17  -3   25.00    3.30
   0  17   4   15.40    2.70
   0  17  -4   20.30    3.00
   0 -17  -4   17.10    2.60
   0 -17   4   25.20    3.10
   0  17   5    8.80    2.00
   0  17  -5    4.90    1.60
   0 -17  -5    4.10    1.80
   0 -17   5    3.10    1.60
   0  17  -6   11.30    2.10
   0  17   6   10.70    2.30
   0 -17  -6    9.80    2.40
   0  18   0   34.20    4.20
   0 -18   0   36.40    4.30
   0  18  -1    0.20    1.30
   0  18   1    0.10    1.40
   0 -18   1    0.50    1.40
   0 -18  -1    2.50    1.50
   0  18   2   57.69    6.30
   0  18  -2   61.89    6.30
   0 -18  -2   56.49    6.30
   0  18  -3    4.60    1.70
   0  18   3    0.30    1.50
   0 -18  -3    3.60    1.70
   0 -18   3    0.80    1.60
   0  18  -4   40.50    4.60
   0  18   4   42.00    4.80
   0 -18   4   28.20    4.50
   0 -18  -4   39.70    4.80
  -1   0  14   56.69    6.20
   1   0 -14   57.09    6.80
  -1   0  13   -1.40    1.40
   1   0 -13   -0.20    1.60
  -1   0  12   76.39    7.40
   1   0 -12   71.99    7.60
   1   0 -11    1.20    1.20
  -1   0  11    0.10    0.90
  -1   0  10  357.76   30.80
   1   0 -10  316.67   30.70
  -1   0   9    0.40    0.50
  -1   0   9   -0.20    0.60
   1   0  -9   -0.30    0.70
  -1   0   8 2127.69  207.98
  -1   0   8 2192.88  208.18
   1   0  -8 2618.94  208.18
   1   0  -7   -0.10    0.40
  -1   0   7    0.10    0.50
   1   0  -7   -0.20    0.30
  -1   0   7   -0.10    0.30
  -1   0   6  689.13   64.49
   1   0  -6  750.62   64.49
  -1   0   6  690.23   64.29
   1   0  -6  679.23   64.39
   1   0  -6  763.22   64.29
  -1   0   5    0.50    0.40
  -1   0   5   -0.20    0.20
   1   0  -5    1.10    0.20
   1   0  -5    0.20    0.40
  -1   0   5   -0.10    0.20
   1   0  -4 1478.45  126.59
  -1   0   4 1459.35  126.49
   1   0  -4 1280.77  126.49
  -1   0   3    0.20    0.20
  -1   0   3    0.60    0.10
  -1   0   3    0.00    0.10
   1   0  -3    0.20    0.10
   1   0  -3    0.00    0.20
   1   0  -3    0.50    0.20
  -1   0   2 1957.90  180.28
  -1   0   2 2160.88  180.48
   1   0  -2 1838.42  180.28
   1   0  -2 1956.70  180.28
  -1   0   2 1976.50  180.28
   1   0  -2 2129.89  180.48
   1   0  -1    0.00    0.10
   1   0  -1    0.00    0.10
  -1   0   1    0.10    0.10
  -1   0   1    0.00    0.10
   1   0   0  401.16   36.20
  -1   0  -2  208.98   20.60
   1   0   2  228.08   20.50
  -1   0  -2  221.08   20.50
   1   0   2  228.08   20.60
   1   0   2  239.68   20.60
  -1   0  -2  241.08   20.60
  -1   0  -3    0.00    0.10
   1   0   3   -0.10    0.10
   1   0   3    0.10    0.10
  -1   0  -3    1.10    0.30
   1   0   3   -0.20    0.20
  -1   0  -3    0.20    0.20
   1   0   4  982.50   83.09
  -1   0  -4  990.50   83.09
  -1   0  -4  796.12   83.19
   1   0   5    0.10    0.10
  -1   0  -5    0.30    0.40
  -1   0  -5    0.30    0.40
   1   0   5    0.60    0.40
   1   0   5    0.00    0.30
  -1   0  -5    0.10    0.20
  -1   0  -6  833.12   73.39
   1   0   6  819.52   73.39
   1   0   6  839.82   73.59
  -1   0  -6  771.32   73.59
  -1   0  -7   -0.10    0.20
  -1   0  -7    0.20    0.50
   1   0   7   -0.20    0.50
  -1   0  -8  423.26   35.10
  -1   0  -8  333.87   34.70
   1   0   8  404.96   35.10
   1   0   9   -0.50    0.80
  -1   0  -9    0.50    0.90
   1   0  10  429.06   41.90
  -1   0 -10  492.75   42.00
  -1   0 -11    0.30    1.30
   1   0  11    0.10    1.00
  -1   0 -12  110.99   11.70
   1   0  12  130.49   11.60
  -1   0 -13   -1.00    1.80
   1   0  13   -0.20    1.50
  -1   1  14   37.80    4.50
   1   1 -14   30.50    5.00
   1  -1 -14   31.40    5.00
   1   1 -13    0.20    1.70
  -1   1  13    1.60    1.40
  -1  -1  13    1.20    1.50
   1  -1 -13    1.90    1.60
  -1   1  12   67.79    6.80
   1   1 -12   70.79    7.00
  -1  -1  12   63.09    6.80
   1  -1 -12   69.59    7.00
  -1   1  11    2.70    1.10
   1   1 -11    2.80    1.20
   1  -1 -11    3.10    0.80
   1  -1 -11    2.60    1.20
  -1   1  10   44.10    4.60
   1   1 -10   43.50    4.20
   1   1 -10   45.90    4.70
  -1  -1  10   43.80    4.60
   1  -1 -10   45.40    4.70
   1  -1 -10   46.00    4.30
  -1   1   9   17.80    2.20
   1   1  -9   20.30    2.10
   1   1  -9   23.20    2.50
  -1   1   9   21.50    2.40
   1  -1  -9   22.60    2.50
   1  -1  -9   19.40    2.10
  -1  -1   9   26.90    2.60
  -1  -1   9   20.80    2.10
   1   1  -8   26.20    2.50
   1   1  -8   22.90    2.10
  -1   1   8   19.50    2.10
  -1  -1   8   18.60    2.10
   1  -1  -8   25.20    2.50
  -1  -1   8   19.60    2.40
  -1   1   7  103.99    9.90
   1   1  -7  119.99   10.10
  -1   1   7  106.49   10.10
   1   1  -7   96.19    9.90
  -1  -1   7  115.49    9.90
   1  -1  -7  119.09   10.00
   1  -1  -7  108.19   10.10
  -1  -1   7  104.19   10.10
  -1   1   6  146.19   13.20
   1   1  -6  142.99   13.30
   1   1  -6  150.98   13.20
  -1   1   6  135.09   13.30
   1   1  -6  160.68   13.40
   1  -1  -6  133.49   13.30
  -1  -1   6  148.49   13.30
  -1  -1   6  146.89   13.20
   1  -1  -6  143.09   13.20
   1   1  -5   20.40    1.80
  -1   1   5   20.30    1.80
   1   1  -5   15.30    2.00
  -1   1   5   17.70    1.90
   1  -1  -5   21.40    1.80
   1  -1  -5   16.50    2.00
  -1  -1   5   20.70    1.80
  -1  -1   5   16.40    1.80
  -1   1   4  585.24   48.20
   1   1  -4  595.64   48.20
  -1   1   4  450.45   48.20
  -1   1   4  573.74   48.30
   1   1  -4  474.35   48.30
   1  -1  -4  492.85   48.20
   1  -1  -4  579.04   48.20
  -1  -1   4  506.95   48.20
  -1  -1   4  590.64   48.30
   1  -1  -4  503.15   48.30
   1   1  -3   50.99    5.40
  -1   1   3   56.49    5.40
   1   1  -3   57.99    5.40
  -1   1   3   58.69    5.40
  -1   1   3   64.49    5.40
   1   1  -3   66.79    5.40
   1  -1  -3   54.79    5.40
   1  -1  -3   65.99    5.50
  -1  -1   3   55.99    5.40
  -1  -1   3   60.79    5.40
   1  -1  -3   58.49    5.40
  -1   1   2 4730.53  388.96
   1   1  -2 4639.44  388.86
  -1   1   2 4330.87  388.96
   1   1  -2 4202.58  388.86
  -1   1   2 3801.02  388.76
  -1  -1   2 4162.08  388.96
  -1  -1   2 4273.47  388.86
   1  -1  -2 4419.26  388.96
  -1  -1   2 4544.95  388.86
   1  -1  -2 4035.20  388.76
   1  -1  -2 4407.96  388.96
  -1   1   1  401.66   34.70
   1   1  -1  372.16   34.70
  -1   1   1  387.56   34.70
  -1   1   1  359.66   34.70
   1   1  -1  415.16   34.80
   1  -1  -1  406.76   34.70
   1  -1  -1  393.66   34.70
  -1  -1   1  364.56   34.70
   1  -1  -1  370.76   34.70
   1   1   0 1219.58  104.59
  -1   1   0 1245.18  104.69
   1   1   0 1213.78  104.69
   1   1   0  996.50  104.59
   1  -1   0 1134.89  104.59
   1  -1   0 1018.30  104.59
   1  -1   0 1306.47  104.59
   1   1   1   58.89    5.60
   1   1   1   69.79    5.60
  -1   1  -1   61.19    5.60
  -1   1  -1   54.49    5.60
   1   1   1   60.09    5.60
  -1   1  -1   65.09    5.60
   1  -1   1   58.59    5.60
  -1  -1  -1   60.29    5.60
   1  -1   1   60.99    5.60
  -1  -1  -1   66.69    5.60
  -1   1  -2 3557.64  312.57
   1   1   2 3175.38  312.47
   1   1   2 3556.54  312.17
   1   1   2 3384.96  312.37
  -1  -1  -2 3506.05  312.57
   1  -1   2 3510.55  312.57
  -1  -1  -2 3612.54  312.27
   1  -1   2 3458.95  312.47
  -1   1  -3   62.89    6.30
   1   1   3   80.99    6.30
   1   1   3   60.49    6.30
  -1  -1  -3   78.89    6.20
  -1  -1  -3   58.39    6.30
  -1  -1  -3   77.59    6.30
   1  -1   3   59.19    6.20
  -1   1  -4 2379.36  218.08
   1   1   4 2238.68  217.98
  -1  -1  -4 2638.74  218.28
   1  -1   4 2441.26  218.38
  -1   1  -5   28.60    2.50
   1   1   5   20.10    2.40
   1   1   5   23.00    2.20
  -1   1  -5   20.30    2.50
   1   1   5   26.50    2.50
  -1  -1  -5   20.80    2.50
  -1  -1  -5   24.80    2.50
   1  -1   5   25.80    2.50
  -1  -1  -5   27.10    2.30
   1   1   6  505.65   46.40
  -1   1  -6  487.75   46.60
   1   1   6  462.35   46.60
   1  -1   6  531.55   46.70
  -1  -1  -6  572.54   46.70
  -1  -1  -6  533.45   46.50
  -1  -1  -6  518.45   46.60
   1   1   7   34.40    3.60
  -1   1  -7   39.10    4.00
   1   1   7   40.20    3.90
   1  -1   7   42.60    4.00
  -1  -1  -7   44.80    3.70
  -1  -1  -7   36.90    3.90
   1   1   8  119.29   10.10
  -1   1  -8  126.49   10.20
   1   1   8  102.59    9.70
  -1  -1  -8   94.49    9.80
   1  -1   8   99.29   10.00
   1   1   9   57.29    4.90
  -1   1  -9   49.00    5.30
   1  -1   9   49.99    5.30
  -1  -1  -9   59.59    5.40
  -1  -1  -9   49.90    4.90
  -1   1 -10   27.20    3.10
   1   1  10   29.50    3.00
  -1  -1 -10   26.10    3.20
  -1  -1 -10   21.60    2.40
   1  -1  10   23.10    2.90
   1   1  11    1.70    1.10
  -1   1 -11    3.80    1.50
   1  -1  11    1.90    1.10
  -1  -1 -11    4.40    1.40
  -1   1 -12    2.90    1.60
   1   1  12    2.20    1.40
  -1  -1 -12    1.90    1.70
   1  -1  12    2.20    1.30
   1   1  13    4.50    1.70
  -1   1 -13    4.00    2.10
  -1  -1 -13    5.20    2.20
   1  -1  13    2.50    1.70
   1   2 -14   12.30    3.10
  -1   2  14   17.10    2.80
  -1  -2  14   25.00    3.60
   1   2 -13   -0.90    1.60
  -1   2  13    0.70    1.40
  -1  -2  13    1.40    1.50
   1   2 -12   84.99    7.40
  -1   2  12   71.79    7.20
  -1  -2  12   64.29    7.20
   1  -2 -12   68.79    7.30
  -1   2  11    2.00    1.10
   1   2 -11    2.80    1.20
   1  -2 -11    1.80    1.20
  -1  -2  11    2.40    1.20
   1  -2 -11    2.30    0.70
  -1   2  10  405.06   33.70
   1   2 -10  321.87   33.40
   1   2 -10  373.16   33.70
   1  -2 -10  393.26   33.80
   1  -2 -10  320.97   33.50
  -1  -2  10  416.26   33.80
   1   2  -9    2.70    0.50
  -1   2   9    2.90    0.70
   1   2  -9    2.60    0.90
  -1   2   9    3.20    0.90
   1  -2  -9    2.10    0.90
  -1  -2   9    3.50    0.90
   1  -2  -9    2.90    0.60
  -1   2   8  309.97   26.80
   1   2  -8  248.88   26.60
   1   2  -8  281.87   26.80
   1  -2  -8  296.57   26.80
   1  -2  -8  327.17   26.70
  -1  -2   8  308.07   26.90
  -1   2   7    2.20    0.50
   1   2  -7    2.50    0.60
  -1   2   7    2.90    0.60
   1   2  -7    3.40    0.40
   1  -2  -7    1.50    0.50
   1  -2  -7    1.90    0.60
  -1  -2   7    2.40    0.70
   1   2  -6 1876.91  151.28
   1   2  -6 1470.75  151.28
  -1   2   6 1882.11  151.28
  -1   2   6 1634.44  151.28
  -1   2   6 1672.73  151.18
   1  -2  -6 1403.06  151.28
  -1  -2   6 1786.12  151.38
  -1  -2   6 1720.43  151.18
   1   2  -5    1.30    0.20
  -1   2   5    1.10    0.30
   1   2  -5    0.50    0.40
  -1   2   5    0.70    0.30
  -1  -2   5    1.20    0.40
   1  -2  -5    0.40    0.30
   1  -2  -5    1.00    0.30
  -1  -2   5    0.90    0.30
   1  -2  -5    0.70    0.40
  -1   2   4  914.41   77.39
   1   2  -4  830.72   77.49
   1   2  -4  918.91   77.39
  -1   2   4  806.32   77.39
  -1   2   4  864.31   77.39
  -1  -2   4  765.42   77.39
   1  -2  -4  918.11   77.39
  -1   2   3   19.30    1.80
  -1   2   3   16.50    1.80
   1   2  -3   16.70    1.90
   1   2  -3   21.10    1.80
   1   2  -3   18.00    1.80
   1  -2  -3   21.00    1.90
   1  -2  -3   19.90    1.80
  -1  -2   3   21.40    1.80
   1   2  -2 1027.40  106.09
   1   2  -2 1150.18  106.29
  -1   2   2 1218.88  106.29
  -1   2   2 1175.78  106.19
   1  -2  -2 1204.18  106.29
  -1  -2   2 1194.98  106.39
   1  -2  -2 1326.67  106.29
  -1  -2   2 1143.49  106.29
   1   2  -1  134.69   13.70
  -1   2   1  152.18   13.70
  -1   2   1  156.08   13.70
  -1   2   1  146.79   13.70
   1   2  -1  155.18   13.70
   1   2  -1  147.99   13.70
   1  -2  -1  143.79   13.70
   1  -2  -1  143.99   13.70
   1  -2  -1  168.88   13.70
  -1  -2   1  150.58   13.70
  -1  -2   1  167.48   13.70
   1   2   0 1273.97  115.99
   1   2   0 1414.86  115.89
   1   2   0 1209.38  115.89
  -1   2   0 1309.17  115.99
  -1   2   0 1257.97  115.89
  -1  -2   0 1350.76  115.99
  -1  -2   0 1296.47  115.99
   1  -2   0 1261.97  115.89
   1  -2   0 1306.97  115.89
   1  -2   0 1265.77  115.89
  -1  -2   0 1212.28  115.89
  -1   2  -1   23.20    2.10
   1   2   1   23.70    2.00
  -1   2  -1   20.10    2.00
   1   2   1   21.70    2.00
  -1   2  -1   21.60    2.00
  -1  -2  -1   21.80    2.00
   1  -2   1   20.40    2.00
   1  -2   1   21.90    2.00
  -1   2  -2   31.00    2.60
   1   2   2   27.40    2.70
   1   2   2   27.50    2.70
  -1   2  -2   27.30    2.70
   1  -2   2   27.50    2.60
   1  -2   2   30.10    2.70
   1  -2   2   29.80    2.70
  -1  -2  -2   29.60    2.70
  -1  -2  -2   28.60    2.70
  -1  -2  -2   30.10    2.70
   1   2   3    1.10    0.30
   1   2   3    1.20    0.30
  -1   2  -3    1.20    0.30
   1   2   3    2.20    0.30
  -1   2  -3    0.90    0.30
   1  -2   3    1.60    0.30
   1  -2   3    0.80    0.30
  -1  -2  -3    1.30    0.30
  -1  -2  -3    1.40    0.30
  -1  -2  -3    1.60    0.30
   1   2   4  141.79   14.00
   1   2   4  161.08   14.10
   1   2   4  179.88   14.00
  -1  -2  -4  147.49   14.10
   1  -2   4  135.99   14.00
  -1  -2  -4  177.08   14.00
  -1  -2  -4  135.49   14.00
  -1   2  -5    3.70    0.70
   1   2   5    3.40    0.50
   1   2   5    2.40    0.50
   1   2   5    2.60    0.60
  -1   2  -5    1.90    0.50
   1  -2   5    3.10    0.60
  -1  -2  -5    1.80    0.50
  -1  -2  -5    3.90    0.50
  -1  -2  -5    2.30    0.60
   1  -2   5    3.50    0.50
   1   2   6  226.48   21.00
  -1   2  -6  210.08   21.00
   1   2   6  233.08   20.80
  -1  -2  -6  211.58   21.00
  -1  -2  -6  244.08   20.90
   1  -2   6  226.98   21.00
  -1  -2  -6  262.57   21.10
   1   2   7   93.09    9.00
  -1   2  -7   98.59    9.00
   1  -2   7   94.89    9.00
  -1  -2  -7   99.99    8.80
  -1  -2  -7   95.19    9.00
   1   2   8  436.76   38.90
  -1   2  -8  418.76   39.00
   1  -2   8  432.56   39.00
  -1  -2  -8  428.66   39.00
  -1   2  -9   -0.10    0.80
   1   2   9    1.10    0.80
   1   2   9    0.40    0.50
   1  -2   9    0.00    0.80
  -1  -2  -9    3.00    1.00
   1   2  10  285.87   28.30
  -1   2 -10  305.47   28.40
   1  -2  10  318.87   28.40
  -1  -2 -10  331.57   28.50
  -1   2 -11   24.50    3.30
  -1  -2 -11   24.20    3.30
   1  -2  11   22.80    3.10
  -1   2 -12  125.09   11.80
   1   2  12  117.69   11.60
  -1  -2 -12  129.19   11.90
   1  -2  12  116.89   11.70
  -1   2 -13    1.20    1.80
   1   2  13    0.60    1.50
  -1  -2 -13    0.30    1.90
   1  -2  13    1.70    1.60
   1   3 -13    0.60    1.70
  -1   3  13    0.80    1.40
  -1  -3  13    0.90    1.50
  -1   3  12   84.29    8.30
   1   3 -12   86.59    8.50
   1   3 -11    4.70    1.40
  -1   3  11    3.90    1.20
  -1  -3  11    3.40    1.20
   1  -3 -11    2.70    0.90
   1   3 -10   28.10    3.20
  -1   3  10   28.10    3.10
   1  -3 -10   24.30    2.80
   1  -3 -10   23.90    3.10
  -1  -3  10   33.30    3.30
  -1   3   9    9.80    1.50
   1   3  -9   10.60    1.60
   1   3  -9    9.50    1.10
   1   3  -9    8.30    1.00
   1  -3  -9    7.80    1.30
   1  -3  -9    9.50    1.30
  -1  -3   9    6.70    1.30
  -1   3   8   13.70    1.70
   1   3  -8   12.80    1.40
   1   3  -8   16.80    1.80
   1   3  -8   12.60    1.40
  -1   3   8   13.40    1.60
  -1  -3   8   17.70    1.90
   1  -3  -8   11.30    1.50
   1  -3  -8   12.70    1.80
  -1   3   7    0.30    0.40
   1   3  -7    0.50    0.50
   1   3  -7    0.70    0.30
  -1   3   7    0.20    0.40
   1   3  -7    1.20    0.40
  -1  -3   7   -0.30    0.50
   1  -3  -7    0.50    0.70
   1  -3  -7    0.50    0.40
   1  -3  -7    0.30    0.40
  -1   3   6   36.60    4.20
   1   3  -6   48.80    4.10
   1   3  -6   40.90    4.20
  -1   3   6   52.49    4.30
  -1  -3   6   46.20    4.20
   1  -3  -6   44.60    4.30
   1  -3  -6   43.60    4.20
  -1  -3   6   41.20    4.30
   1   3  -5    4.10    0.60
   1   3  -5    1.70    0.50
  -1   3   5    1.90    0.50
  -1   3   5    2.60    0.50
   1   3  -5    2.60    0.40
   1  -3  -5    2.70    0.60
  -1  -3   5    1.60    0.40
  -1  -3   5    2.40    0.60
   1   3  -4 1237.08  115.39
   1   3  -4 1311.97  115.39
  -1   3   4 1394.66  115.59
   1   3  -4 1123.99  115.39
  -1   3   4 1160.58  115.39
   1  -3  -4 1465.15  115.39
  -1   3   3  255.17   24.10
  -1   3   3  306.27   24.10
  -1   3   3  300.17   24.20
   1   3  -3  228.28   24.10
   1   3  -3  274.67   24.10
  -1  -3   3  240.48   24.10
  -1  -3   3  235.68   24.10
   1  -3  -3  292.77   24.10
   1   3  -2 4072.39  377.86
  -1   3   2 4143.19  377.66
   1   3  -2 4012.70  377.76
   1   3  -2 4277.97  377.76
  -1   3   2 4341.17  378.16
   1  -3  -2 4410.36  377.66
  -1  -3   2 4143.19  377.86
  -1  -3   2 4358.86  377.96
  -1  -3   2 4027.20  377.96
  -1   3   1  849.72   81.99
  -1   3   1  865.71   81.99
  -1   3   1  771.12   81.99
   1   3  -1  950.90   82.09
   1   3  -1  876.01   81.99
   1   3  -1 1014.80   82.09
   1  -3  -1  990.10   82.09
  -1  -3   1  888.51   82.09
   1  -3  -1  985.40   82.19
  -1  -3   1  921.61   82.09
  -1  -3   1  911.61   81.99
   1   3   0 9977.70  832.92
   1   3   0 9229.68  832.72
  -1   3   0 8215.98  832.72
  -1  -3   0 8341.87  832.72
   1  -3   0 9999.00  832.92
  -1  -3   0 9793.72  833.02
   1   3   1  143.09   12.50
  -1   3  -1  135.89   12.50
   1   3   1  130.79   12.50
   1   3   1  148.59   12.50
  -1   3  -1  150.48   12.50
   1  -3   1  133.49   12.50
   1  -3   1  134.69   12.50
   1  -3   1  129.19   12.50
   1   3   2 2875.31  284.57
  -1   3  -2 3614.94  284.27
  -1   3  -2 2800.32  284.47
  -1   3  -2 2928.91  284.67
   1   3   2 3209.58  284.47
   1   3   2 3087.59  284.47
   1  -3   2 3521.65  284.27
  -1  -3  -2 3686.23  284.67
   1  -3   2 2717.23  284.57
   1   3   3   33.00    2.90
  -1   3  -3   27.10    3.00
   1   3   3   33.70    3.00
   1   3   3   30.80    3.00
  -1   3  -3   31.20    2.90
   1  -3   3   31.00    2.90
  -1  -3  -3   34.10    3.00
  -1  -3  -3   29.70    2.90
  -1   3  -4 1078.29   95.79
   1   3   4 1032.40   95.89
  -1   3  -4  952.00   95.89
   1   3   4 1201.18   95.79
  -1  -3  -4 1059.59   95.79
  -1  -3  -4 1236.68   95.89
  -1  -3  -4 1023.10   95.79
   1  -3   4  910.51   95.79
   1  -3   4 1083.99   95.89
   1   3   5   93.69    7.80
  -1   3  -5   74.69    7.80
  -1   3  -5   91.29    7.90
   1   3   5   74.99    7.60
  -1  -3  -5   86.39    7.70
  -1  -3  -5   80.49    7.80
   1  -3   5   83.39    7.70
   1  -3   5   88.49    7.80
  -1   3  -6  673.23   58.59
   1   3   6  557.74   58.39
   1   3   6  673.43   58.49
  -1  -3  -6  691.93   58.59
  -1   3  -7   97.49    9.40
   1   3   7  106.59    9.40
  -1  -3  -7  101.09    9.50
   1  -3   7   88.79    9.40
  -1  -3  -7  110.19    9.30
  -1   3  -8  124.99   11.60
   1   3   8  118.59   11.50
  -1  -3  -8  104.89   11.30
  -1  -3  -8  136.79   11.60
   1  -3   8  140.29   11.70
  -1   3  -9    0.80    0.80
   1   3   9    0.00    0.70
  -1  -3  -9   -1.00    0.80
   1  -3   9   -0.70    0.70
  -1  -3  -9    0.70    0.60
   1   3  10    0.30    0.90
  -1   3 -10    0.50    1.00
  -1  -3 -10    1.10    0.70
  -1  -3 -10   -1.40    1.00
   1   3  11   24.30    3.10
  -1   3 -11   27.90    3.20
  -1  -3 -11   19.70    3.20
   1  -3  11   19.80    3.00
   1   3  12    9.80    1.90
  -1   3 -12   11.30    2.10
   1  -3  12    9.00    2.00
   1   3  13    0.20    1.60
  -1   3 -13    1.40    1.90
   1  -3  13   -0.50    1.60
  -1   4  13   -0.70    1.40
   1   4 -13    1.70    1.70
  -1  -4  13    1.70    1.60
   1   4 -12  137.99   12.50
  -1  -4  12  123.19   12.40
  -1   4  11    3.30    1.10
   1  -4 -11    3.10    1.00
  -1  -4  11    2.30    1.20
   1   4 -10  193.88   15.80
  -1   4  10  181.18   15.70
  -1  -4  10  147.19   15.80
   1  -4 -10  159.98   15.60
   1   4  -9   19.50    2.20
  -1   4   9   18.90    2.10
   1   4  -9   16.00    1.60
   1  -4  -9   14.10    1.90
  -1  -4   9   15.00    2.10
   1   4  -8  620.94   54.49
   1   4  -8  552.94   54.19
  -1   4   8  635.04   54.39
  -1   4   7   10.00    1.30
  -1   4   7    9.00    1.20
   1   4  -7    9.00    1.40
   1   4  -7    8.10    1.10
   1   4  -7   10.80    1.10
   1  -4  -7   12.00    1.70
  -1  -4   7    9.70    1.50
   1  -4  -7   10.60    1.30
  -1   4   6  777.72   61.39
   1   4  -6  732.13   61.49
   1   4  -6  575.64   61.29
   1  -4  -6  620.94   61.39
   1  -4  -6  697.13   61.39
  -1  -4   6  684.73   61.49
  -1   4   5    6.90    1.20
   1   4  -5   12.40    1.10
   1   4  -5   11.60    1.10
   1   4  -5    7.70    1.30
  -1   4   5   10.10    1.10
  -1   4   5    8.90    1.10
   1   4  -5   11.30    1.20
   1  -4  -5   10.30    1.20
  -1  -4   5   10.90    1.30
  -1  -4   5    8.00    1.20
  -1   4   4 2075.99  201.88
  -1  -4   4 2415.16  202.38
   1   4  -3   10.40    1.30
   1   4  -3   12.00    1.30
   1   4  -3   14.40    1.30
  -1   4   3   11.60    1.30
  -1   4   3   10.70    1.30
  -1   4   3   13.00    1.20
   1  -4  -3   14.90    1.30
  -1  -4   3   10.40    1.30
  -1  -4   3   14.10    1.40
  -1  -4   3   13.40    1.30
   1   4  -2  929.71   83.19
   1   4  -2  954.20   83.19
   1   4  -2  993.60   83.29
  -1   4   2  841.42   83.29
  -1  -4   2  934.11   83.19
   1  -4  -2  980.70   83.29
  -1  -4   2  973.10   83.29
   1  -4  -2  792.42   83.29
  -1   4   1    9.60    0.90
  -1   4   1    8.70    0.80
   1   4  -1    8.00    0.90
   1   4  -1    8.90    0.80
   1   4  -1    8.20    0.90
  -1  -4   1    7.90    0.90
   1  -4  -1    7.10    0.90
   1  -4  -1    6.60    0.80
  -1  -4   1    8.40    0.80
  -1  -4   1    9.50    0.90
   1  -4  -1    8.50    0.90
   1   4   0  249.97   21.90
   1   4   0  236.38   22.00
  -1   4   0  265.67   22.00
  -1  -4   0  243.28   21.90
   1  -4   0  233.28   21.90
  -1  -4   0  232.68   22.00
   1  -4   0  241.68   21.90
   1   4   1   12.40    1.20
  -1   4  -1   13.50    1.20
   1   4   1   13.70    1.30
  -1   4  -1   14.00    1.30
  -1   4  -1   11.00    1.30
  -1  -4  -1   13.20    1.30
   1  -4   1   12.40    1.30
  -1  -4  -1   12.10    1.30
  -1   4  -2    1.80    0.40
   1   4   2    2.70    0.50
  -1   4  -2    2.00    0.40
   1   4   2    2.90    0.30
   1   4   2    1.80    0.30
   1  -4   2    2.70    0.30
   1  -4   2    2.70    0.40
   1  -4   2    2.30    0.40
  -1   4  -3   26.30    2.80
   1   4   3   31.60    2.70
   1   4   3   25.20    2.80
  -1   4  -3   32.30    2.60
   1  -4   3   28.00    2.60
  -1  -4  -3   31.90    2.70
   1  -4   3   22.60    2.70
  -1   4  -4  274.67   20.90
  -1   4  -4  246.68   21.00
   1   4   4  209.48   21.10
   1   4   4  215.58   20.90
   1  -4   4  210.78   21.10
  -1   4  -5   10.40    1.30
   1  -4   5   12.80    1.40
  -1  -4  -5   12.40    1.30
  -1  -4  -5    8.90    1.30
  -1   4  -6  858.81   74.59
   1   4   6  764.42   74.59
  -1  -4  -6  888.31   74.49
   1  -4   6  797.12   74.69
  -1   4  -7    4.70    1.00
   1   4   7    7.50    1.00
   1   4   7    7.60    1.10
  -1  -4  -7    6.50    0.90
   1  -4   7    7.10    1.10
   1   4   8  361.66   29.80
   1   4   8  344.77   30.00
  -1   4  -8  277.07   30.00
  -1  -4  -8  327.17   29.90
   1  -4   8  338.47   30.10
   1   4   9    6.40    1.30
  -1   4  -9    9.20    1.50
  -1  -4  -9    8.70    1.20
   1  -4   9    8.70    1.50
   1   4  10  262.97   22.00
   1  -4  10  245.18   22.10
  -1  -4 -10  212.78   21.80
   1   4  11    1.40    1.20
  -1   4 -11   -1.20    1.20
   1  -4  11   -1.20    1.00
  -1   4 -12  106.99   10.30
   1   4  12  101.99   10.20
   1  -4  12  108.79   10.30
   1   4  13   -0.30    1.80
  -1   4 -13    1.00    1.80
   1  -4  13   -0.20    1.70
   1   5 -13    1.40    1.60
  -1   5  13    2.90    1.70
  -1  -5  13    5.20    1.80
   1   5 -12   11.70    2.20
  -1   5  12   12.90    2.10
  -1  -5  12   17.80    2.50
   1   5 -11   -0.80    1.00
  -1   5  11   -0.50    0.90
   1  -5 -11   -0.80    0.90
  -1  -5  11   -0.20    1.10
  -1   5  10   35.60    3.80
  -1  -5  10   35.70    4.00
   1  -5 -10   36.20    3.70
  -1   5   9    4.10    0.90
   1   5  -9    4.30    0.60
   1   5  -9    6.20    1.20
  -1  -5   9    4.00    1.00
   1  -5  -9    4.60    0.90
   1   5  -8    2.10    0.40
   1   5  -8    1.80    0.70
   1   5  -8    1.40    0.50
   1  -5  -8    2.00    0.60
  -1  -5   8    2.00    0.80
   1   5  -7   23.60    2.60
   1   5  -7   28.80    2.90
   1   5  -7   30.60    2.60
  -1   5   7   30.70    2.80
  -1  -5   7   28.70    3.00
   1  -5  -7   24.90    2.80
   1   5  -6  135.59   13.10
  -1   5   6  169.18   13.20
  -1   5   6  128.99   13.30
   1   5  -6  131.49   13.10
   1   5  -6  137.99   13.20
   1  -5  -6  142.49   13.20
  -1  -5   6  165.58   13.40
  -1   5   5   43.80    3.80
  -1   5   5   38.70    4.00
   1   5  -5   43.20    3.80
  -1   5   5   47.10    4.00
   1   5  -5   40.40    3.80
  -1  -5   5   34.90    4.00
  -1  -5   5   43.40    3.90
   1  -5  -5   35.30    3.90
   1  -5  -5   42.10    3.90
  -1   5   4  174.78   15.10
   1   5  -4  136.59   15.20
   1   5  -4  180.98   15.10
  -1   5   4  174.88   15.30
   1   5  -4  158.58   15.20
  -1  -5   4  175.38   15.30
   1   5  -3    1.70    0.40
  -1   5   3    2.20    0.40
   1   5  -3    2.60    0.50
  -1   5   3    2.00    0.30
   1  -5  -3    2.90    0.50
  -1  -5   3    1.50    0.40
  -1  -5   3    2.30    0.40
   1  -5  -3    3.10    0.40
  -1  -5   3    1.90    0.50
  -1   5   2 1394.76  113.39
  -1   5   2 1303.67  113.49
   1   5  -2 1180.78  113.39
  -1   5   2 1091.99  113.29
   1   5  -2 1288.87  113.39
   1   5  -2 1426.06  113.39
  -1  -5   2 1380.06  113.39
   1  -5  -2 1119.69  113.39
  -1  -5   2 1152.68  113.39
   1   5  -1   42.10    4.10
   1  -5  -1   41.90    4.00
  -1  -5   1   48.10    4.10
  -1  -5   1   42.90    4.10
   1  -5  -1   46.30    4.00
   1  -5  -1   43.60    4.00
   1  -5  -1   40.20    4.10
   1   5   0 1664.13  139.79
   1   5   0 1692.13  139.89
  -1   5   0 1418.06  139.79
  -1  -5   0 1488.85  139.89
  -1  -5   0 1623.74  140.09
  -1  -5   0 1345.87  139.79
   1  -5   0 1622.64  139.99
   1  -5   0 1492.35  139.89
   1  -5   0 1641.64  140.09
  -1   5  -1    5.50    0.60
   1   5   1    3.60    0.60
  -1   5  -1    3.50    0.60
  -1   5  -1    4.70    0.60
   1   5   1    4.80    0.70
   1  -5   1    3.90    0.50
   1  -5   1    5.30    0.60
   1  -5   1    3.70    0.60
  -1  -5  -1    4.40    0.70
   1   5   2 1748.63  162.08
   1   5   2 1828.52  162.08
  -1   5  -2 1693.63  162.08
  -1   5  -2 1882.11  162.18
   1  -5   2 1889.31  162.38
   1  -5   2 1769.42  162.18
  -1   5  -3   35.10    3.00
  -1   5  -3   29.10    3.00
   1   5   3   30.00    2.80
   1   5   3   28.30    3.00
   1   5   3   32.90    3.00
   1   5   3   28.00    2.90
   1  -5   3   25.60    2.90
   1  -5   3   34.90    2.80
  -1  -5  -3   29.70    2.90
   1   5   4 1198.18  100.69
   1   5   4 1122.89  100.49
  -1   5  -4 1018.40  100.49
   1  -5   4 1185.88  100.59
   1  -5   4 1157.68  100.59
  -1  -5  -4  953.80  100.49
   1  -5   4 1178.58  100.49
  -1   5  -5   74.39    7.30
  -1   5  -5   79.69    7.10
  -1   5  -5   81.09    7.10
   1   5   5   80.49    7.20
  -1  -5  -5   79.39    7.20
  -1  -5  -5   72.09    7.20
   1   5   6  425.56   40.70
   1   5   6  492.55   40.80
  -1   5  -6  401.46   40.80
   1  -5   6  488.25   41.00
  -1  -5  -6  524.15   40.80
  -1  -5  -6  378.86   40.80
   1   5   7   20.00    2.30
  -1   5  -7   20.90    2.40
  -1  -5  -7   23.10    2.30
  -1  -5  -7   25.40    2.60
   1  -5   7   16.90    2.40
   1   5   8  111.29   10.60
  -1   5  -8  110.79   10.70
   1  -5   8  120.89   10.80
   1   5   9   23.50    2.70
   1  -5   9   24.10    3.00
  -1  -5  -9   25.50    2.70
  -1   5 -10   10.90    1.90
   1   5  10   15.20    2.20
   1  -5  10   14.40    2.30
  -1  -5 -10   15.90    2.00
   1   5  11    1.10    1.20
  -1   5 -11   -0.90    1.10
   1  -5  11    1.10    1.10
   1   5  12   10.80    2.00
  -1   5 -12    9.20    2.00
   1  -5  12   10.20    2.00
   1   5  13    5.90    2.10
  -1   5 -13    8.90    2.20
   1  -5  13   11.10    2.30
   1   6 -13    6.50    2.00
  -1   6  13    8.50    2.10
  -1   6  13   16.30    3.30
  -1  -6  13    9.40    2.30
   1   6 -12   59.19    6.40
  -1   6  12   61.59    7.10
  -1  -6  12   64.69    6.50
   1   6 -11   39.50    3.90
  -1   6  11   29.30    4.50
  -1   6  11   30.70    3.70
   1  -6 -11   34.80    3.70
  -1  -6  11   31.20    3.90
  -1   6  10  263.37   23.80
  -1   6  10  248.98   23.30
  -1  -6  10  252.57   23.60
   1  -6 -10  258.27   23.30
   1   6  -9   -0.60    0.80
  -1   6   9   -0.50    1.10
  -1   6   9   -0.60    0.60
   1   6  -9    0.10    0.30
   1  -6  -9   -0.60    0.70
  -1  -6   9    0.50    0.80
   1   6  -8  247.58   26.40
   1   6  -8  311.27   26.20
  -1   6   8  263.07   26.70
   1   6  -8  297.47   26.20
  -1   6   8  269.77   26.40
   1  -6  -8  336.87   26.50
  -1  -6   8  308.07   26.60
   1   6  -7   23.20    2.30
   1   6  -7   17.80    2.00
  -1   6   7   25.90    2.60
  -1   6   7   19.20    2.10
   1   6  -7   18.70    2.00
  -1  -6   7   22.00    2.40
   1  -6  -7   18.40    2.30
   1  -6  -7   21.80    2.20
   1   6  -6  905.81   84.09
   1   6  -6  948.81   83.99
  -1   6   6 1036.10   84.29
   1  -6  -6  832.02   83.99
  -1  -6   6  933.31   84.19
   1  -6  -6  943.01   84.09
   1   6  -5   43.30    4.20
  -1   6   5   41.60    4.30
  -1   6   5   45.10    4.10
   1   6  -5   37.70    4.10
  -1  -6   5   44.30    4.30
   1  -6  -5   50.29    4.20
   1  -6  -5   46.10    4.20
   1   6  -4  616.34   61.09
  -1   6   4  660.03   60.99
  -1   6   4  707.53   61.19
  -1   6   4  732.73   61.09
  -1  -6   4  713.93   61.09
  -1  -6   4  641.44   60.99
   1  -6  -4  673.13   61.09
   1   6  -3   54.49    5.80
   1   6  -3   58.09    5.80
  -1   6   3   65.19    5.70
  -1   6   3   51.39    5.90
   1   6  -3   66.89    5.80
   1  -6  -3   66.39    5.80
   1  -6  -3   72.09    5.70
  -1  -6   3   66.39    5.80
  -1   6   2  211.28   18.40
   1   6  -2  211.38   18.30
   1  -6  -2  206.78   18.30
  -1  -6   2  175.78   18.30
  -1  -6   2  203.78   18.30
  -1   6   1   82.89    8.60
   1   6  -1   84.59    8.60
   1   6  -1   98.79    8.60
   1  -6  -1   88.29    8.70
   1  -6  -1  108.69    8.60
   1  -6  -1  110.49    8.60
  -1  -6   1   85.69    8.70
   1   6   0  174.88   16.00
  -1   6   0  149.59   16.00
   1  -6   0  194.78   16.00
  -1  -6   0  187.68   16.00
  -1   6  -1  253.27   21.60
   1   6   1  258.57   21.70
  -1  -6  -1  194.68   21.60
   1  -6   1  230.98   21.60
   1  -6   1  240.78   21.60
  -1  -6  -1  253.97   21.60
  -1   6  -2   14.40    1.50
  -1   6  -2   13.30    1.40
   1   6   2   17.00    1.60
  -1   6  -2   13.90    1.50
  -1  -6  -2   13.60    1.50
   1  -6   2   14.50    1.50
   1  -6   2   14.30    1.40
  -1   6  -3  138.79   13.00
   1   6   3  149.59   12.80
  -1   6  -3  129.99   12.80
   1   6   3  146.59   12.80
   1   6   3  112.99   13.00
   1  -6   3  146.89   13.00
   1  -6   3  154.18   13.00
  -1  -6  -3  155.68   13.00
  -1   6  -4  249.68   22.80
   1   6   4  262.37   22.70
   1   6   4  254.47   22.70
  -1   6  -4  236.78   22.80
   1   6   4  222.58   22.80
   1  -6   4  251.37   22.60
   1  -6   4  261.87   22.80
  -1  -6  -4  267.57   22.80
  -1   6  -5    6.60    1.00
  -1   6  -5    5.30    0.70
   1   6   5    5.60    1.00
   1   6   5    8.30    0.90
  -1  -6  -5    7.50    1.00
   1  -6   5    7.90    1.20
  -1   6  -6  517.25   48.00
   1   6   6  531.05   48.20
   1   6   6  540.95   48.00
   1  -6   6  525.15   48.10
  -1  -6  -6  541.55   48.00
   1   6   7    8.40    1.20
  -1   6  -7    7.50    1.20
   1  -6   7    5.10    1.10
  -1  -6  -7    5.50    1.00
  -1   6  -8  555.34   54.29
   1   6   8  607.64   54.19
   1  -6   8  637.24   54.39
  -1   6  -9   -0.50    0.90
   1   6   9    0.30    0.80
   1  -6   9    0.30    1.00
  -1  -6  -9    0.80    0.70
  -1   6 -10  222.38   19.00
   1   6  10  205.98   18.80
   1  -6  10  185.88   19.00
  -1  -6 -10  205.98   18.80
   1   6  11   -0.30    1.20
  -1   6 -11    1.50    1.30
   1  -6  11   -0.70    1.10
  -1  -6 -11   -0.20    1.00
   1   6  12  102.09    9.40
  -1   6 -12   91.69    9.50
   1  -6  12   92.89    9.40
   1   7 -13    1.60    1.80
  -1   7  13   -2.80    2.60
  -1  -7  13    1.30    1.90
  -1   7  12   65.49    7.10
   1   7 -12   54.69    6.20
   1  -7 -12   58.89    6.10
  -1  -7  12   60.29    6.40
  -1   7  11   -1.40    1.60
   1   7 -11   -0.20    1.20
  -1   7  11    0.30    1.10
  -1  -7  11    0.10    1.20
   1  -7 -11   -1.90    1.10
  -1   7  10   32.40    3.50
  -1   7  10   33.90    4.20
   1  -7 -10   32.20    3.60
  -1  -7  10   31.40    3.70
   1   7  -9   21.40    2.40
   1   7  -9   15.10    1.70
  -1   7   9   20.60    2.10
  -1   7   9   16.50    2.50
  -1  -7   9   15.90    2.40
   1  -7  -9   17.00    2.20
   1   7  -8    2.50    0.80
  -1   7   8    2.40    1.00
   1   7  -8    1.50    0.50
  -1   7   8    3.00    0.70
   1   7  -8    2.90    0.60
  -1  -7   8    2.60    0.80
   1  -7  -8    1.70    0.70
   1  -7  -8    0.20    1.10
   1   7  -7   21.60    2.20
   1   7  -7   17.10    2.00
  -1   7   7   23.20    2.50
  -1   7   7   24.20    2.10
   1   7  -7   16.80    2.00
   1  -7  -7   17.40    2.30
   1  -7  -7   19.90    2.20
  -1  -7   7   18.80    2.30
   1   7  -6   82.29    8.30
   1   7  -6   98.59    8.50
  -1   7   6   98.79    8.60
  -1   7   6  106.29    8.30
  -1  -7   6   77.69    8.50
   1  -7  -6   80.19    8.40
   1  -7  -6   91.29    8.40
  -1   7   5    4.30    0.90
   1   7  -5    2.80    0.60
  -1   7   5    4.10    0.50
   1   7  -5    3.20    0.70
   1  -7  -5    3.60    0.70
   1  -7  -5    2.80    0.60
  -1  -7   5    3.30    0.70
  -1   7   4  780.62   64.19
   1   7  -4  742.23   64.29
   1   7  -4  572.04   64.29
  -1  -7   4  754.72   64.39
   1  -7  -4  678.33   64.19
   1  -7  -4  749.92   64.29
   1   7  -3   35.30    3.20
  -1   7   3   35.50    3.20
   1   7  -3   28.00    3.20
  -1   7   3   32.90    3.30
  -1  -7   3   32.90    3.20
   1  -7  -3   34.10    3.20
   1   7  -2  588.24   52.09
   1   7  -2  580.84   51.99
  -1   7   2  562.74   52.09
   1  -7  -2  516.65   51.99
  -1  -7   2  635.54   52.09
  -1  -7   2  578.94   51.99
   1   7  -1   73.89    6.70
   1   7  -1   70.09    6.60
  -1  -7   1   58.79    6.70
   1  -7  -1   75.69    6.60
   1  -7  -1   71.29    6.70
  -1  -7   1   66.29    6.70
   1  -7  -1   80.09    6.60
  -1  -7   1   81.89    6.60
   1   7   0 1482.25  131.39
  -1   7   0 1361.06  131.29
   1   7   0 1518.65  131.19
  -1  -7   0 1344.17  131.29
  -1  -7   0 1549.54  131.29
   1  -7   0 1496.95  131.29
   1   7   1    8.30    1.20
  -1   7  -1   11.00    1.20
   1   7   1   13.00    1.40
  -1   7  -1   10.60    1.20
   1  -7   1   12.60    1.20
   1  -7   1   11.50    1.40
  -1  -7  -1   10.30    1.40
   1   7   2 1911.51  160.18
  -1   7  -2 1529.95  159.98
   1   7   2 1882.11  159.98
  -1   7  -2 1573.34  159.98
   1  -7   2 1677.33  160.08
  -1  -7  -2 1958.10  160.08
   1  -7   2 1921.21  160.08
   1   7   3    3.70    0.80
  -1   7  -3    5.60    0.70
  -1   7  -3    3.70    0.80
  -1   7  -3    5.60    0.80
   1  -7   3    4.60    0.80
   1  -7   3    4.40    0.60
  -1  -7  -3    4.00    0.70
  -1   7  -4  747.43   63.69
   1   7   4  773.72   63.59
  -1   7  -4  619.44   63.59
   1   7   4  630.84   63.79
   1  -7   4  797.32   63.79
  -1  -7  -4  688.33   63.69
   1  -7   4  686.63   63.59
   1   7   5    5.60    1.00
   1   7   5    4.20    0.70
  -1   7  -5    5.00    0.80
  -1   7  -5    4.80    0.70
   1  -7   5    6.10    1.00
  -1  -7  -5    6.00    0.90
   1   7   6  219.68   19.80
  -1   7  -6  181.18   19.30
  -1   7  -6  213.78   19.60
   1  -7   6  230.88   19.70
  -1  -7  -6  232.58   19.60
  -1   7  -7    6.70    1.20
   1   7   7   10.10    1.30
   1   7   7    6.50    1.50
  -1  -7  -7    9.70    1.30
   1  -7   7   11.20    1.70
  -1   7  -8   92.49    8.20
   1   7   8   84.59    8.50
  -1  -7  -8   80.99    8.10
   1   7   9    0.90    0.90
  -1   7  -9   -0.80    0.80
  -1  -7  -9    0.50    0.90
   1   7  10    0.10    1.00
  -1   7 -10    0.60    1.10
   1   7  10    1.60    1.50
   1  -7  10   -0.20    1.20
  -1  -7 -10    2.60    1.00
   1   7  11   20.80    3.00
   1   7  11   18.80    3.30
  -1   7 -11   19.10    3.10
  -1  -7 -11   27.50    3.00
   1  -7  11   21.50    3.20
  -1   7 -12   -0.90    1.50
   1   7  12    1.90    2.50
   1  -7  12    2.40    1.50
  -1   8  12   39.80    5.40
   1   8 -12   31.70    4.40
   1  -8 -12   35.80    4.30
  -1  -8  12   33.70    4.50
  -1   8  11    2.70    1.80
  -1   8  11    3.40    1.30
   1   8 -11    1.10    1.30
  -1  -8  11    0.40    1.40
   1   8 -10   79.39    7.30
  -1   8  10   71.79    7.10
  -1   8  10   75.39    7.70
  -1  -8  10   73.29    7.40
   1  -8 -10   72.19    7.20
  -1   8   9    5.60    1.50
  -1   8   9    5.40    1.00
   1   8  -9    8.10    1.30
  -1  -8   9    4.90    1.30
   1  -8  -9    3.90    1.20
  -1   8   8  373.96   30.00
  -1   8   8  320.67   30.30
   1  -8  -8  312.37   30.10
  -1  -8   8  314.77   30.20
   1   8  -7    6.30    1.00
   1   8  -7    7.70    1.00
   1   8  -7   10.00    1.40
  -1   8   7   10.90    1.60
   1  -8  -7    9.90    1.50
  -1  -8   7    7.30    1.30
   1  -8  -7    7.20    1.20
   1   8  -6  227.38   19.20
  -1   8   6  200.18   19.30
   1   8  -6  187.18   19.00
  -1   8   6  205.98   19.00
   1  -8  -6  223.88   19.10
  -1  -8   6  215.88   19.30
   1   8  -5   24.40    2.40
  -1   8   5   19.60    2.10
   1   8  -5   17.80    2.30
  -1   8   5   25.20    2.60
  -1  -8   5   26.80    2.50
   1  -8  -5   26.80    2.40
   1   8  -4  350.16   30.40
  -1   8   4  306.87   30.40
   1   8  -4  338.57   30.30
  -1  -8   4  339.57   30.40
   1  -8  -4  337.57   30.30
   1   8  -3   51.09    4.80
  -1   8   3   50.59    4.90
  -1  -8   3   49.80    4.80
   1  -8  -3   52.59    4.80
  -1  -8   3   49.10    4.70
   1   8  -2  342.97   30.60
   1   8  -2  335.97   30.60
   1   8  -2  363.76   30.60
  -1   8   2  338.77   30.70
  -1  -8   2  325.57   30.60
  -1  -8   2  322.87   30.60
   1  -8  -2  339.67   30.60
   1   8  -1  101.39    9.50
   1   8  -1  105.29    9.60
   1   8  -1  108.39    9.50
  -1   8   1  103.89    9.50
  -1   8   1  107.79    9.60
  -1  -8   1  104.99    9.50
   1  -8  -1   96.19    9.50
  -1  -8   1  104.79    9.70
  -1   8   0   15.00    1.60
  -1   8   0   17.70    1.70
   1   8   0   13.20    1.40
   1   8   0   16.40    1.70
   1   8   0   15.40    1.60
  -1  -8   0   15.50    1.60
  -1  -8   0   15.90    1.40
   1  -8   0   17.30    1.50
   1  -8   0   13.60    1.50
   1  -8   0   14.90    1.80
   1  -8   0   14.30    1.60
  -1   8  -1    7.20    1.00
  -1   8  -1    5.50    0.80
   1   8   1    6.20    1.00
  -1  -8  -1    8.30    1.00
   1  -8   1    8.00    0.90
   1  -8   1    7.60    0.90
  -1   8  -2   13.50    1.60
   1   8   2   17.80    1.80
  -1   8  -2   14.90    1.60
   1  -8   2   13.50    1.50
  -1  -8  -2   16.20    1.70
   1   8   3   79.89    7.90
  -1   8  -3   86.49    7.80
  -1  -8  -3   89.59    7.90
   1  -8   3   80.29    7.80
   1  -8   3   84.99    7.70
  -1   8  -4  137.39   14.20
  -1  -8  -4  169.88   14.40
   1  -8   4  164.58   14.40
   1   8   5   58.29    5.80
  -1   8  -5   58.49    5.80
   1   8   5   71.99    5.80
  -1   8  -5   72.19    6.10
   1   8   5   74.39    6.20
   1  -8   5   52.49    5.80
  -1  -8  -5   52.39    6.00
   1  -8   5   70.99    6.10
  -1   8  -6  187.58   14.50
  -1   8  -6  145.99   14.10
   1   8   6  165.68   14.20
  -1  -8  -6  143.29   14.40
   1  -8   6  140.29   14.40
  -1   8  -7   15.90    2.00
   1   8   7   10.50    1.90
   1   8   7   17.80    1.70
   1  -8   7   11.60    2.00
  -1  -8  -7   12.90    1.90
   1   8   8  262.27   23.20
   1   8   8  244.58   22.70
   1  -8   8  256.17   23.00
  -1  -8  -8  237.68   22.80
   1   8   9   10.10    2.30
   1   8   9   14.40    1.90
  -1   8  -9   12.60    1.90
   1  -8   9   15.20    2.30
  -1  -8  -9   13.60    1.80
  -1   8 -10  164.58   13.90
   1   8  10  139.49   14.20
  -1  -8 -10  149.19   13.70
   1  -8  10  133.89   13.80
   1   8  11   -0.80    2.10
  -1   8 -11    0.10    1.30
  -1  -8 -11   -0.40    1.30
   1  -8  11    0.60    1.30
   1   8  12   98.59   10.70
   1  -8  12   98.69    9.90
  -1   9  12   25.50    3.90
   1   9 -12   16.50    3.00
  -1  -9  12   26.30    4.00
   1  -9 -12   28.60    3.90
   1   9 -11    7.40    1.80
  -1   9  11    9.70    2.30
  -1  -9  11    8.70    2.00
   1  -9 -11    9.10    1.90
   1   9 -10   14.20    2.30
  -1   9  10   19.00    2.90
  -1  -9  10   15.90    2.40
  -1   9   9   50.19    5.80
  -1   9   9   59.69    5.30
   1  -9  -9   51.09    5.50
  -1   9   8   -0.70    0.90
   1   9  -8    1.30    0.60
   1   9  -8    2.00    1.00
  -1   9   8    0.50    0.60
   1  -9  -8    0.90    0.80
  -1  -9   8    1.90    1.00
   1   9  -7   38.20    3.80
  -1   9   7   38.50    3.80
   1   9  -7   49.20    4.10
  -1   9   7   40.90    4.30
   1  -9  -7   35.70    4.10
  -1  -9   7   39.90    4.20
  -1   9   6   40.40    3.90
  -1   9   6   36.00    4.30
   1   9  -6   49.50    4.20
  -1  -9   6   40.30    4.20
   1  -9  -6   42.20    4.20
   1   9  -5   65.19    5.80
   1   9  -5   70.59    5.70
  -1   9   5   63.29    5.90
  -1  -9   5   55.79    5.80
   1  -9  -5   61.49    5.80
  -1  -9   5   50.19    5.60
  -1   9   4  157.08   14.30
   1   9  -4  170.78   14.30
   1   9  -4  156.58   14.10
   1   9  -4  151.48   14.20
  -1  -9   4  135.99   14.10
  -1  -9   4  159.78   14.20
   1   9  -3  126.19   12.00
  -1   9   3  138.19   12.10
  -1  -9   3  124.39   11.90
  -1  -9   3  138.39   12.00
   1  -9  -3  126.89   12.00
   1   9  -2  832.62   68.09
  -1   9   2  752.32   68.19
  -1  -9   2  734.13   68.09
   1  -9  -2  763.72   68.09
  -1  -9   2  695.13   68.09
   1   9  -1    1.50    0.50
  -1   9   1    2.30    0.60
   1   9  -1    1.80    0.40
  -1  -9   1    2.00    0.40
   1  -9  -1    1.20    0.40
  -1  -9   1    2.40    0.60
  -1   9   0  928.11   80.89
   1   9   0  865.01   80.79
   1  -9   0  763.92   80.69
   1  -9   0  955.10   80.79
  -1  -9   0  927.81   80.79
   1  -9   0  941.21   80.69
  -1   9  -1   88.39    7.60
   1   9   1   84.39    7.70
  -1   9  -1   67.79    7.60
   1  -9   1   83.39    7.60
   1  -9   1   85.69    7.50
  -1  -9  -1   81.29    7.60
  -1   9  -2 1065.09   95.39
   1   9   2  983.70   95.49
  -1   9  -2 1126.49   95.39
  -1  -9  -2 1091.59   95.39
   1  -9   2 1026.90   95.29
  -1   9  -3    4.70    0.80
   1   9   3    2.80    0.80
  -1   9  -3    4.60    0.90
  -1   9  -3    5.30    0.80
  -1  -9  -3    4.70    0.90
   1  -9   3    4.70    0.80
   1  -9   3    4.50    0.70
  -1   9  -4  413.16   38.20
   1  -9   4  433.26   38.20
   1  -9   4  414.26   38.40
  -1  -9  -4  432.86   38.40
   1   9   5   34.00    3.50
  -1   9  -5   28.20    3.10
  -1   9  -5   38.30    3.30
  -1  -9  -5   31.00    3.30
   1  -9   5   25.20    3.30
   1  -9   5   34.40    3.00
   1   9   6  195.78   17.10
  -1   9  -6  197.48   17.10
   1   9   6  197.98   17.10
   1  -9   6  167.58   17.30
  -1  -9  -6  181.68   17.30
   1   9   7    0.40    0.90
  -1   9  -7    1.70    0.80
  -1   9  -7    0.90    0.40
  -1  -9  -7    0.70    0.80
   1  -9   7   -0.40    0.90
   1   9   8   58.19    5.40
  -1  -9  -8   56.89    5.70
   1  -9   8   55.29    5.80
   1   9   9   41.20    4.90
  -1   9  -9   39.30    4.50
   1   9   9   50.79    4.30
   1  -9   9   36.80    4.50
  -1  -9  -9   39.00    4.50
   1   9  10   28.40    4.00
  -1   9 -10   24.50    3.30
   1  -9  10   23.70    3.40
  -1   9 -11    7.30    1.90
   1   9  11   13.30    2.60
   1  -9  11   10.10    2.10
  -1  -9 -11   10.60    1.90
  -1  10  12   57.89    6.90
   1  10 -12   42.90    5.70
  -1 -10  12   50.89    5.90
   1  10 -11    7.00    1.80
  -1  10  11    4.70    2.40
   1 -10 -11   11.30    2.10
  -1 -10  11    6.70    1.90
   1  10 -10   87.59    8.70
  -1  10  10   86.49    9.20
   1 -10 -10   97.99    8.80
  -1 -10  10   85.89    8.80
  -1  10   9    1.60    1.60
   1  10  -9    0.00    1.00
  -1 -10   9    3.50    1.20
   1  10  -8  140.99   11.90
  -1  10   8  123.19   12.40
   1  10  -8  122.49   11.70
   1 -10  -8  129.39   12.00
  -1 -10   8  120.89   12.00
   1  10  -7    0.30    0.70
  -1  10   7   -0.10    0.40
   1  10  -7    0.10    0.60
  -1  10   7   -1.60    1.00
  -1 -10   7   -0.10    0.90
   1 -10  -7    0.20    0.80
  -1  10   6  385.66   33.80
  -1 -10   6  351.96   33.60
   1 -10  -6  373.16   33.60
   1  10  -5   13.80    1.60
  -1  10   5   10.60    1.60
   1 -10  -5    8.50    1.40
  -1 -10   5   11.50    1.40
  -1 -10   5   13.80    1.70
   1  10  -4  308.37   28.30
   1 -10  -4  318.57   28.30
  -1 -10   4  296.07   28.20
  -1 -10   4  322.57   28.30
   1  10  -3   38.60    3.40
  -1  10   3   31.20    3.50
   1  10  -3   29.00    3.30
  -1 -10   3   29.90    3.30
  -1 -10   3   40.80    3.40
   1 -10  -3   33.90    3.40
  -1  10   2  149.49   14.80
   1  10  -2  144.49   14.80
   1  10  -2  149.79   14.70
  -1 -10   2  183.68   14.80
   1 -10  -2  181.08   14.80
   1  10  -1   62.39    6.40
   1  10  -1   74.99    6.60
  -1  10   1   75.29    6.70
  -1 -10   1   75.69    6.40
  -1 -10   1   73.09    6.60
   1 -10  -1   60.99    6.50
  -1  10   0   76.19    8.00
   1  10   0   97.99    8.10
   1 -10   0   88.89    8.00
   1 -10   0   81.39    7.80
  -1 -10   0   87.99    8.00
  -1  10  -1   44.30    4.00
   1  10   1   39.30    4.00
   1 -10   1   43.40    4.00
  -1 -10  -1   40.70    4.00
   1 -10   1   40.30    3.90
   1 -10   1   38.10    3.90
  -1  10  -2   80.99    7.80
   1  10   2   72.79    7.90
   1 -10   2   90.79    7.80
   1 -10   2   82.39    7.70
  -1 -10  -2   90.69    7.90
  -1  10  -3   46.70    4.50
   1  10   3   50.99    4.60
   1 -10   3   41.90    4.40
   1 -10   3   44.40    4.50
  -1 -10  -3   49.30    4.50
  -1  10  -4   90.19    8.50
   1  10   4   80.09    8.50
  -1 -10  -4   89.89    8.50
   1 -10   4   98.19    8.30
   1 -10   4   90.89    8.50
  -1  10  -5   19.20    2.60
   1  10   5   22.90    2.80
  -1  10  -5   25.60    2.60
  -1 -10  -5   23.60    2.70
   1 -10   5   28.80    2.80
   1 -10   5   25.30    2.40
  -1  10  -6  191.78   15.60
   1  10   6  191.38   15.80
   1 -10   6  139.79   15.60
  -1 -10  -6  155.88   15.60
  -1  10  -7   20.00    2.20
   1  10   7   11.40    2.20
   1  10   7   14.40    1.60
   1 -10   7   14.40    2.20
  -1 -10  -7   15.90    2.20
   1  10   8  109.69   10.30
  -1 -10  -8   99.99    9.90
   1  10   9    8.80    2.10
  -1  10  -9    7.10    1.50
   1 -10   9    8.80    1.60
  -1 -10  -9    8.10    1.70
  -1  10 -10   79.59    8.10
   1  10  10   80.49    8.50
  -1 -10 -10   80.79    7.90
   1 -10  10   78.69    8.00
  -1  10 -11    3.20    1.80
   1  10  11    8.70    2.80
   1 -10  11    9.80    2.10
  -1 -10 -11    6.10    1.90
   1  11 -11    5.90    2.10
  -1  11  11   14.00    2.90
   1 -11 -11    8.90    2.30
  -1 -11  11   12.50    2.40
  -1  11  10    1.00    2.00
   1  11 -10    0.80    1.40
   1 -11 -10    0.20    1.50
  -1 -11  10    3.70    1.60
   1  11  -9   26.10    3.00
  -1  11   9   17.30    3.00
  -1 -11   9   19.60    3.00
   1 -11  -9   17.90    2.70
   1  11  -8    2.60    0.80
   1  11  -8    6.10    1.30
  -1  11   8    2.90    1.30
  -1 -11   8    3.90    1.30
   1 -11  -8    4.10    1.30
  -1  11   7   46.80    5.00
   1  11  -7   45.40    4.50
  -1 -11   7   45.20    4.80
   1 -11  -7   46.60    4.70
  -1  11   6   23.70    3.00
   1  11  -6   28.30    2.80
  -1 -11   6   21.20    2.90
  -1  11   5   77.49    8.30
   1  11  -5   93.79    8.20
  -1 -11   5   78.09    8.20
  -1 -11   5   94.29    8.10
   1 -11  -5   92.69    8.30
   1  11  -4  241.18   21.50
  -1  11   4  233.28   21.60
   1 -11  -4  215.48   21.50
  -1 -11   4  225.18   21.50
  -1 -11   4  260.87   21.40
   1  11  -3   25.90    3.30
  -1  11   3   33.20    3.40
   1  11  -3   38.10    3.40
  -1 -11   3   32.10    3.30
  -1 -11   3   31.10    3.30
   1 -11  -3   36.70    3.40
   1  11  -2  202.98   18.40
   1  11  -2  206.18   18.30
  -1  11   2  167.48   18.40
   1 -11  -2  212.18   18.40
  -1 -11   2  215.38   18.30
  -1  11   1  106.79    9.80
   1  11  -1  106.19    9.70
  -1 -11   1  102.09    9.70
   1 -11  -1  103.59    9.70
   1  11   0  662.93   71.29
  -1 -11   0  853.31   71.39
   1 -11   0  771.12   71.09
   1 -11   0  876.21   71.29
  -1  11  -1    2.30    0.70
   1  11   1    1.70    0.70
   1 -11   1    2.70    0.60
   1 -11   1    2.40    0.60
  -1 -11  -1    1.50    0.60
   1 -11   1    2.60    0.60
  -1  11  -2  442.16   36.40
   1  11   2  356.36   36.40
   1 -11   2  408.06   36.30
   1 -11   2  450.25   36.30
  -1 -11  -2  348.57   36.30
  -1  11  -3    0.20    0.50
   1  11   3    1.20    0.70
   1 -11   3    0.60    0.60
   1 -11   3    1.20    0.60
  -1 -11  -3    0.60    0.60
   1  11   4  204.08   19.50
  -1  11  -4  187.48   19.40
   1 -11   4  227.68   19.50
   1 -11   4  229.68   19.30
  -1 -11  -4  212.78   19.50
   1  11   5    6.30    1.40
  -1  11  -5    7.40    1.20
  -1 -11  -5    9.00    1.30
   1 -11   5    7.90    1.30
   1 -11   5    7.50    1.00
   1  11   6  166.38   15.50
  -1  11  -6  165.78   15.40
   1 -11   6  176.58   15.40
  -1 -11  -6  155.48   15.40
  -1  11  -7   27.70    2.90
   1  11   7   26.70    3.60
   1 -11   7   30.50    3.40
  -1 -11  -7   29.90    3.40
  -1  11  -8    7.70    1.50
   1  11   8    7.60    1.80
  -1 -11  -8    6.00    1.50
   1 -11   8    5.00    1.40
   1  11   9    6.30    2.20
  -1  11  -9    8.40    1.60
   1 -11   9    6.80    1.60
  -1 -11  -9    7.80    1.70
   1  11  10   -1.30    2.00
  -1  11 -10   -0.90    1.50
  -1 -11 -10    2.00    1.50
   1 -11  10    1.90    1.50
  -1  11 -11   11.90    2.60
  -1 -11 -11   11.00    2.50
  -1  12  10   81.59    8.10
   1  12 -10   65.19    7.50
  -1 -12  10   70.19    7.60
   1 -12 -10   83.29    7.80
   1  12  -9    1.80    1.30
  -1  12   9    6.00    1.90
  -1 -12   9    3.10    1.50
   1 -12  -9    4.60    1.60
  -1  12   8  178.68   14.40
   1  12  -8  160.28   14.00
   1 -12  -8  139.79   14.10
  -1 -12   8  125.79   14.00
  -1  12   7    7.90    1.70
   1  12  -7    7.70    1.40
   1 -12  -7    5.60    1.40
  -1 -12   7    5.60    1.50
  -1  12   6  196.28   19.10
   1 -12  -6  214.08   19.00
  -1 -12   6  207.58   19.00
  -1  12   5    1.20    1.00
   1  12  -5    1.80    0.80
  -1 -12   5    1.50    0.90
   1 -12  -5    0.70    0.80
  -1 -12   5    1.30    0.70
   1  12  -4  158.48   14.10
  -1  12   4  140.29   14.10
  -1 -12   4  138.19   14.00
  -1 -12   4  155.58   14.00
   1 -12  -4  170.18   14.10
   1  12  -3   23.60    3.00
  -1  12   3   24.00    3.10
   1 -12  -3   36.00    3.10
  -1 -12   3   33.70    3.00
  -1 -12   3   27.30    3.00
  -1  12   2  177.78   16.40
   1  12  -2  177.78   16.30
   1 -12  -2  178.08   16.30
   1  12  -1   81.09    7.00
  -1  12   1   71.69    7.00
  -1 -12   1   83.99    7.00
   1 -12  -1   68.49    6.90
  -1 -12   1   64.29    6.70
  -1  12   0   48.70    4.50
   1  12   0   41.30    4.50
   1 -12   0   48.40    4.40
  -1 -12   0   42.00    4.40
   1  12   1   70.49    7.20
  -1  12  -1   78.99    7.30
   1 -12   1   84.99    7.20
   1 -12   1   70.39    7.00
  -1 -12  -1   83.49    7.20
   1 -12   1   70.29    7.00
  -1  12  -2    1.20    0.70
   1  12   2    2.50    0.80
   1 -12   2    3.00    0.90
   1 -12   2    1.00    0.60
   1 -12   2    2.00    0.60
  -1 -12  -2    2.70    0.70
   1  12   3   26.70    3.10
  -1 -12  -3   30.10    3.10
   1 -12   3   25.80    2.90
   1 -12   3   29.60    3.00
   1  12   4   30.00    3.70
  -1  12  -4   35.80    3.60
   1 -12   4   34.80    3.60
   1 -12   4   34.70    3.40
   1  12   5   38.00    4.20
  -1 -12  -5   38.00    4.10
   1 -12   5   38.30    4.00
   1  12   6   70.59    7.20
   1 -12   6   74.19    7.10
  -1  12  -7    3.20    1.10
   1  12   7    3.90    1.40
  -1 -12  -7    3.80    1.30
   1 -12   7    2.60    1.20
  -1  12  -8  101.39    8.90
   1  12   8   90.39    9.10
  -1 -12  -8   88.89    8.90
   1 -12   8   84.29    8.80
  -1  12  -9   -0.30    1.30
   1  12   9   -1.30    1.70
  -1 -12  -9    0.80    1.50
   1 -12   9    1.00    1.40
   1  12  10   67.49    8.20
  -1 -12 -10   73.99    7.60
   1 -12  10   72.29    7.50
  -1  13  10   -4.10    2.10
   1  13 -10    0.90    1.60
  -1 -13  10    1.10    1.80
   1 -13 -10    3.10    1.90
  -1  13   9    3.30    1.90
   1  13  -9    5.90    1.60
  -1 -13   9    7.00    1.70
   1 -13  -9    4.60    1.80
  -1  13   8    1.10    1.60
   1  13  -8    1.20    1.10
   1 -13  -8    0.60    1.30
  -1 -13   8    1.50    1.40
   1  13  -7   48.10    4.70
  -1  13   7   39.00    4.90
  -1 -13   7   41.20    4.70
   1 -13  -7   50.59    5.00
   1  13  -6   18.30    2.30
  -1  13   6   13.30    2.30
   1 -13  -6   17.20    2.50
  -1 -13   6   18.50    2.50
   1  13  -5   42.40    3.80
   1 -13  -5   28.00    3.60
  -1 -13   5   35.20    3.50
  -1 -13   5   29.60    3.60
   1  13  -4   63.19    6.20
  -1  13   4   60.99    6.30
  -1 -13   4   67.59    6.30
   1 -13  -4   65.19    6.30
   1  13  -3   62.09    6.00
  -1  13   3   63.59    6.10
  -1 -13   3   62.09    5.90
  -1 -13   3   53.59    5.90
   1 -13  -3   69.29    6.10
  -1  13   2  255.97   22.80
   1  13  -2  209.58   22.70
  -1 -13   2  264.27   22.70
   1 -13  -2  266.57   22.80
   1  13  -1   16.40    2.00
  -1  13   1   10.30    1.80
   1 -13  -1   17.30    2.00
  -1 -13   1   14.30    1.90
  -1  13   0  249.28   21.20
   1  13   0  235.58   21.20
   1 -13   0  228.38   21.10
  -1 -13   0  211.18   21.10
  -1  13  -1    1.30    0.90
   1  13   1    1.60    0.80
  -1 -13  -1    0.80    0.70
   1 -13   1    1.20    0.70
   1 -13   1    0.30    0.50
  -1  13  -2  235.68   21.10
   1  13   2  214.48   21.10
   1 -13   2  229.08   21.00
  -1 -13  -2  242.38   21.10
   1  13   3   18.20    2.60
   1 -13   3   18.10    2.40
   1 -13   3   22.70    2.50
  -1 -13  -3   28.20    2.70
   1 -13   4  152.88   14.30
   1 -13   4  160.18   14.50
   1  13   5    4.20    1.30
  -1  13  -5    4.00    1.10
  -1 -13  -5    4.20    1.20
   1 -13   5    3.70    0.90
   1 -13   5    3.90    1.10
   1  13   6  108.99   10.80
  -1  13  -6  108.99   10.60
   1 -13   6  122.99   10.70
  -1 -13  -6  108.09   10.70
   1  13   7    6.20    1.80
  -1  13  -7    7.20    1.60
   1 -13   7   11.90    1.90
  -1 -13  -7    8.80    1.80
  -1  13  -8   25.00    3.20
   1  13   8   22.00    3.30
  -1 -13  -8   22.50    3.30
   1 -13   8   19.30    3.20
   1  13   9   12.80    2.70
  -1  13  -9   10.80    2.20
  -1 -13  -9   15.70    2.40
   1 -13   9   13.20    2.40
   1  14  -9    2.80    1.60
  -1  14   9    5.50    2.30
  -1 -14   9    4.70    2.10
   1 -14  -9    6.20    2.00
   1  14  -8   82.89    8.70
  -1  14   8   86.49    9.10
  -1 -14   8   89.49    8.90
   1 -14  -8  100.29    9.00
  -1  14   7    0.60    1.40
   1  14  -7    2.00    1.20
   1 -14  -7   -0.10    1.20
  -1  14   6   89.29    9.40
   1 -14  -6   97.49    9.40
  -1 -14   6  103.19    9.30
  -1  14   5    5.20    1.40
   1  14  -5    6.30    1.30
  -1 -14   5    4.50    1.10
   1 -14  -5    4.30    1.40
  -1 -14   5    5.50    1.40
   1  14  -4   93.29    9.60
  -1  14   4   97.89    9.70
  -1 -14   4  100.89    9.60
  -1 -14   4  111.49    9.60
   1 -14  -4  106.59    9.70
  -1  14   3   17.00    2.40
   1 -14  -3   14.90    2.30
  -1 -14   3   17.40    2.20
  -1 -14   3   19.70    2.30
   1  14  -2   52.19    5.10
   1 -14  -2   56.89    5.10
  -1 -14   2   46.80    4.70
  -1 -14   2   48.30    5.00
   1  14  -1   47.90    4.70
  -1  14   1   44.70    4.70
   1 -14  -1   46.50    4.70
  -1 -14   1   46.40    4.70
  -1  14   0   19.20    2.90
   1  14   0   27.50    2.90
   1 -14   0   28.70    2.80
  -1 -14   0   25.10    2.90
  -1  14  -1   67.79    7.50
   1  14   1   78.29    7.60
   1 -14   1   89.49    7.50
   1 -14   2    6.00    1.20
   1 -14   2    5.60    1.00
   1  14   3   61.09    5.80
  -1  14  -3   48.50    5.60
   1 -14   3   52.39    5.60
   1 -14   3   64.49    5.60
  -1 -14  -3   59.69    5.70
   1  14   4   12.10    1.90
  -1  14  -4   12.20    1.80
  -1 -14  -4    8.20    1.70
   1 -14   4   14.90    2.10
   1 -14   4   15.60    1.90
  -1  14  -5   10.70    1.70
   1  14   5    7.90    1.80
   1 -14   5   10.00    1.50
  -1 -14  -5   13.10    2.00
   1 -14   5   12.50    1.80
  -1  14  -6   10.20    1.80
   1  14   6   14.80    2.40
   1 -14   6   15.40    2.10
  -1 -14  -6   12.00    2.00
  -1  14  -7    2.90    1.30
   1  14   7    2.30    1.60
   1 -14   7    4.50    1.60
  -1 -14  -7    2.90    1.40
   1  14   8   38.10    5.30
  -1  14  -8   43.50    5.00
   1 -14   8   47.00    5.10
  -1  14  -9    7.20    1.90
   1  14   9    1.60    2.20
   1 -14   9    4.70    2.00
  -1 -14  -9    4.40    2.20
   1  15  -8    0.80    1.40
  -1  15   8    2.80    2.10
   1 -15  -8    2.50    1.80
  -1 -15   8    0.00    1.90
   1  15  -7   11.50    1.90
  -1  15   7   12.80    2.40
  -1 -15   7   12.20    2.30
   1 -15  -7   13.50    2.30
   1  15  -6    1.70    1.10
  -1  15   6    1.70    1.50
   1 -15  -6    5.20    1.50
  -1 -15   6    3.20    1.50
   1  15  -5   14.90    2.10
  -1  15   5   15.20    2.30
  -1 -15   5   13.00    2.00
   1 -15  -5   17.20    2.30
  -1  15   4   50.19    5.30
   1  15  -4   49.40    5.20
  -1 -15   4   48.80    5.10
   1 -15  -4   55.69    5.30
   1  15  -3    4.60    1.20
  -1  15   3    3.40    1.30
  -1 -15   3    6.10    1.30
   1 -15  -3    3.90    1.20
   1  15  -2  205.98   18.50
   1 -15  -2  193.78   18.40
   1  15  -1   25.60    3.00
  -1  15   1   22.90    3.10
   1 -15  -1   29.70    3.00
  -1  15   0  117.09   11.10
   1  15   0  116.89   11.00
   1  15   1    0.10    0.90
  -1  15  -1    0.30    0.90
   1 -15   1    0.20    0.80
  -1 -15  -1    0.20    0.90
  -1  15  -2  126.29   11.90
   1  15   2  125.79   11.90
  -1 -15  -2  126.69   11.90
  -1  15  -3   -0.30    1.00
   1  15   3    1.40    1.00
  -1 -15  -3    0.80    0.90
   1 -15   3    0.10    0.90
  -1  15  -4  105.69    9.60
   1  15   4   96.89    9.70
   1 -15   4  100.29    9.50
  -1 -15  -4   97.59    9.60
   1  15   5    5.00    1.50
  -1  15  -5    6.20    1.50
  -1 -15  -5    4.70    1.40
   1 -15   5    4.50    1.30
   1 -15   5    9.70    1.70
   1  15   6   43.20    5.40
  -1  15  -6   44.80    5.10
   1 -15   6   51.49    5.30
  -1 -15  -6   50.99    5.30
   1  15   7   22.60    3.50
  -1  15  -7   23.10    3.40
   1 -15   7   26.70    3.80
  -1  15  -8   33.60    4.10
   1  15   8   23.20    3.80
   1 -15   8   31.30    4.30
  -1 -15  -8   26.00    3.80
  -1  16   7    6.10    1.90
   1  16  -7    3.20    1.50
   1 -16  -7    1.40    1.80
  -1  16   6   32.40    4.20
   1  16  -6   31.20    3.90
   1 -16  -6   34.00    4.30
  -1  16   5   10.40    2.00
   1  16  -5   11.10    1.80
  -1 -16   5    9.30    1.70
   1 -16  -5    7.50    1.80
  -1  16   4   31.30    3.70
   1  16  -4   26.80    3.50
  -1 -16   4   27.90    3.50
   1 -16  -4   33.40    3.70
   1  16  -3    2.10    1.20
  -1  16   3    0.70    1.20
  -1 -16   3   -0.50    1.20
   1 -16  -3    1.80    1.20
   1  16  -2   49.50    5.50
  -1  16   2   46.90    5.60
  -1 -16   2   67.39    5.70
   1 -16  -2   57.29    5.60
   1  16  -1    1.60    1.10
  -1  16   1    1.00    1.10
   1 -16  -1    3.70    1.10
  -1 -16   1    2.20    1.10
  -1  16   0    8.20    1.60
   1  16   0    7.70    1.60
   1 -16   0    5.20    1.40
  -1 -16   0   10.40    1.70
  -1  16  -1   38.50    4.30
   1  16   1   41.70    4.30
  -1 -16  -1   38.60    4.30
  -1  16  -2    2.00    1.10
   1  16   2    0.00    1.10
  -1 -16  -2    0.10    1.10
   1 -16   2   -1.40    1.00
  -1  16  -3   24.20    3.30
   1  16   3   28.20    3.50
   1 -16   3   24.00    3.20
  -1 -16  -3   30.50    3.50
  -1  16  -4    4.50    1.50
   1  16   4    7.90    1.70
  -1 -16  -4    9.00    1.70
  -1  16  -5    2.20    1.20
   1  16   5    1.50    1.50
   1 -16   5    1.90    1.20
  -1 -16  -5    3.00    1.50
  -1  16  -6    5.90    1.60
   1  16   6    9.00    2.10
  -1 -16  -6   12.20    2.10
  -1  16  -7    7.90    1.90
   1  16   7    5.40    2.20
  -1 -16  -7    6.30    2.10
   1  17  -6   12.50    2.30
  -1  17   6   14.90    2.70
   1 -17  -6   15.00    2.70
  -1  17   5   20.20    2.90
   1  17  -5   16.50    2.60
  -1 -17   5   23.30    3.10
   1 -17  -5   25.20    3.40
  -1  17   4   27.50    3.70
   1  17  -4   22.90    3.30
  -1 -17   4   20.50    3.30
   1 -17  -4   27.50    3.50
   1  17  -3   13.50    2.10
  -1  17   3   13.80    2.20
   1 -17  -3   13.80    2.10
  -1 -17   3   14.50    2.20
  -1  17   2   24.30    3.40
   1  17  -2   25.90    3.30
   1 -17  -2   25.80    3.30
  -1 -17   2   24.50    3.40
  -1  17   1    0.10    1.10
   1  17  -1    0.40    1.20
   1 -17  -1    1.20    1.10
  -1 -17   1    0.10    1.20
   1  17   0   66.99    7.30
  -1  17   0   77.39    7.40
   1 -17   0   68.39    7.30
  -1 -17   0   83.79    7.40
   1  17   1    2.70    1.30
  -1  17  -1   -0.50    1.20
  -1 -17  -1    1.20    1.30
   1 -17   1    3.50    1.30
  -1  17  -2   79.59    7.50
   1  17   2   69.99    7.40
   1 -17   2   77.29    7.40
  -1 -17  -2   71.99    7.50
  -1  17  -3    9.80    1.80
   1  17   3    6.10    1.90
   1 -17   3    8.70    1.70
  -1 -17  -3    7.80    1.80
   1  17   4   33.30    4.40
  -1  17  -4   33.30    4.30
  -1 -17  -4   41.90    4.60
   1 -17   4   38.40    4.30
  -1  17  -5   39.30    4.70
   1  17   5   35.60    4.90
  -1 -17  -5   44.20    5.00
  -1  18   4   37.90    4.50
   1  18  -4   36.20    4.30
   1 -18  -4   39.00    4.50
  -1 -18   4   24.30    4.20
  -1  18   3    4.10    1.80
   1  18  -3    5.20    1.70
   1 -18  -3    4.60    1.60
  -1 -18   3    3.00    1.70
  -1  18   2    7.00    1.80
   1  18  -2    4.70    1.50
   1 -18  -2    2.60    1.50
  -1 -18   2    3.10    1.70
   1  18  -1   15.50    2.40
  -1  18   1   16.40    2.50
   1 -18  -1   15.90    2.40
  -1 -18   1   20.40    2.60
   1  18   0    3.30    1.60
  -1  18   0    5.80    1.50
   1 -18   0    5.50    1.60
  -1 -18   0    5.60    1.70
  -1  18  -1   20.80    3.60
   1  18   1   27.30    3.60
   1 -18   1   27.20    3.60
  -1 -18  -1   32.40    3.80
   1  18   2    0.70    1.40
  -1  18  -2    4.00    1.60
   1 -18   2    1.40    1.60
  -1 -18  -2    1.40    1.60
   1  18   3   12.40    2.30
  -1  18  -3   14.20    2.40
  -1 -18  -3   15.80    2.60
   1 -18   3   11.60    2.30
   2   0 -14   32.00    4.80
  -2   0  14   35.40    4.40
   2   0 -13    0.30    1.60
  -2   0  13    1.20    1.30
  -2   0  12  139.29   14.40
   2   0 -12  168.68   14.50
   2   0 -11    0.30    1.10
  -2   0  11   -0.50    0.90
   2   0 -11    0.70    0.60
   2   0 -10  146.19   13.30
  -2   0  10  146.19   13.40
   2   0 -10  138.19   13.10
  -2   0   9    0.50    0.50
   2   0  -9    0.10    0.60
   2   0  -9   -0.40    0.40
  -2   0   9   -0.10    0.70
  -2   0   8  170.08   16.90
   2   0  -8  199.58   16.90
  -2   0   7    0.60    0.40
  -2   0   7    0.00    0.50
  -2   0   7   -0.40    0.30
   2   0  -7    0.60    0.50
   2   0  -6   40.90    3.50
   2   0  -6   41.10    3.70
  -2   0   6   36.90    3.70
   2   0  -6   34.10    3.60
  -2   0   6   35.80    3.50
  -2   0   5    0.10    0.20
  -2   0   5    1.50    0.40
   2   0  -5    0.10    0.30
  -2   0   5    0.00    0.20
   2   0  -5    0.20    0.20
   2   0  -5   -0.30    0.20
  -2   0   4 2975.70  249.97
   2   0  -4 2544.75  249.88
  -2   0   4 2728.33  249.97
  -2   0   4 2858.11  250.27
   2   0  -3    0.10    0.20
  -2   0   3    0.00    0.10
  -2   0   3    0.10    0.10
  -2   0   3    0.00    0.10
   2   0  -3    0.00    0.10
   2   0  -3    0.60    0.20
  -2   0   2 1854.01  159.28
   2   0  -2 1705.03  159.18
   2   0  -2 1716.73  159.08
  -2   0   2 1793.42  158.98
  -2   0   1    0.00    0.10
  -2   0   1    0.10    0.10
   2   0  -1    0.30    0.10
   2   0  -1   -0.10    0.10
  -2   0   0 3145.89  284.87
   2   0   0 3103.59  285.07
  -2   0   0 3322.77  284.97
   2   0   0 3326.67  284.97
   2   0   0 3068.89  284.87
  -2   0   0 3031.10  285.07
   2   0   1    0.10    0.20
  -2   0  -1    0.00    0.10
   2   0   1    0.10    0.10
   2   0   1    0.00    0.10
  -2   0  -2 5393.66  464.85
   2   0   2 4447.16  464.75
   2   0   2 5649.04  464.35
  -2   0  -3    0.10    0.30
   2   0   3    0.80    0.30
   2   0   3   -0.10    0.20
  -2   0  -3    0.00    0.20
   2   0   3    0.00    0.10
   2   0   4 1355.36  120.69
   2   0   4 1370.56  120.59
  -2   0  -4 1243.78  120.69
  -2   0  -4 1390.16  120.59
  -2   0  -5    0.40    0.50
   2   0   5    0.40    0.10
   2   0   5    0.00    0.40
  -2   0  -5   -0.30    0.30
   2   0   5   -0.20    0.30
  -2   0  -5    0.20    0.20
  -2   0  -6  673.23   61.09
  -2   0  -6  664.43   61.29
   2   0   6  718.83   61.09
   2   0   6  658.53   61.29
   2   0   7    0.00    0.50
  -2   0  -7   -0.70    0.60
  -2   0  -8  209.28   17.50
   2   0   8  170.88   17.40
  -2   0  -9   -0.60    1.00
   2   0   9    0.10    0.70
   2   0  10    6.10    1.30
  -2   0 -11    0.90    1.40
   2   0  11    0.10    1.10
   2   0  12    1.20    1.40
  -2   0 -12   -1.10    1.60
  -2   0 -13   -0.70    2.10
   2   0  13    0.50    1.50
  -2   1  14    2.00    1.80
   2   1 -14    0.70    2.00
  -2  -1  14    2.50    1.70
  -2   1  13    2.20    1.40
   2   1 -13    3.60    1.80
   2  -1 -13    1.80    1.60
  -2  -1  13    3.40    1.50
   2   1 -12   44.00    5.40
  -2   1  12   53.19    5.30
   2  -1 -12   55.59    5.50
  -2  -1  12   48.90    5.30
   2   1 -11    1.70    1.10
   2   1 -11    0.40    0.60
  -2   1  11    1.60    1.00
   2  -1 -11    3.50    1.20
  -2  -1  11    2.10    1.10
   2  -1 -11    1.60    0.70
   2   1 -10  234.28   23.00
   2   1 -10  250.07   23.30
  -2   1  10  282.17   23.40
   2  -1 -10  232.28   23.10
   2  -1 -10  287.07   23.30
  -2  -1  10  244.98   23.30
  -2   1   9    2.60    0.70
   2   1  -9    1.80    0.80
  -2   1   9    2.50    0.80
   2   1  -9    2.00    0.60
  -2  -1   9    1.70    0.60
   2  -1  -9    2.80    0.60
   2  -1  -9    1.70    0.80
  -2  -1   9    2.30    0.90
   2   1  -8  455.95   35.80
  -2   1   8  387.46   35.80
  -2  -1   8  348.57   35.80
   2  -1  -8  438.96   35.80
  -2  -1   8  343.97   35.60
  -2   1   7    5.10    0.90
  -2   1   7    3.90    0.70
   2   1  -7    4.90    0.80
   2   1  -7    6.10    0.70
  -2   1   7    5.00    0.80
   2  -1  -7    5.40    0.70
   2  -1  -7    4.90    0.80
  -2  -1   7    3.70    0.60
  -2  -1   7    4.30    0.90
  -2  -1   7    4.00    0.70
   2   1  -6 1723.13  157.38
  -2   1   6 1798.72  157.38
  -2   1   6 1647.74  157.28
   2   1  -6 1936.41  157.58
   2  -1  -6 1501.15  157.28
  -2  -1   6 1753.12  157.38
  -2  -1   6 1883.31  157.28
  -2   1   5    4.00    0.60
   2   1  -5    4.70    0.60
   2   1  -5    4.20    0.60
   2   1  -5    3.60    0.60
  -2   1   5    4.40    0.60
  -2  -1   5    4.40    0.70
   2  -1  -5    3.40    0.60
   2  -1  -5    4.40    0.60
  -2  -1   5    5.90    0.60
   2  -1  -5    4.30    0.70
  -2  -1   5    2.70    0.50
   2   1  -4 2905.61  272.07
  -2   1   4 2794.02  272.07
   2   1  -4 2972.30  272.17
  -2   1   4 3181.38  272.17
  -2   1   4 3164.98  272.47
   2  -1  -4 3058.09  272.17
  -2  -1   4 3072.89  272.17
  -2  -1   4 2797.32  272.27
  -2  -1   4 3263.87  272.17
   2   1  -3   82.99    7.10
   2   1  -3   71.99    7.10
  -2   1   3   86.09    7.10
   2   1  -3   72.29    7.10
  -2   1   3   73.99    7.10
  -2  -1   3   81.39    7.10
  -2  -1   3   74.29    7.10
   2  -1  -3   81.89    7.10
   2  -1  -3   79.39    7.10
  -2  -1   3   76.99    7.10
  -2   1   2 1770.82  153.88
   2   1  -2 1595.54  153.78
   2   1  -2 1665.43  153.68
  -2   1   2 1521.35  153.78
   2   1  -2 1780.62  153.98
  -2   1   2 1936.41  153.88
  -2   1   2 1718.73  153.78
  -2  -1   2 1708.43  153.68
   2  -1  -2 1817.42  153.98
  -2  -1   2 1570.94  153.78
   2   1  -1   73.49    6.30
  -2   1   1   60.19    6.40
  -2   1   1   68.49    6.30
  -2   1   1   73.69    6.40
   2   1  -1   67.89    6.40
   2  -1  -1   73.99    6.30
  -2  -1   1   76.19    6.30
   2  -1  -1   69.09    6.40
   2  -1  -1   69.19    6.40
  -2  -1   1   68.89    6.40
   2   1   0 1087.69   89.29
  -2   1   0 1005.90   89.39
   2   1   0  925.91   89.19
  -2   1   0  917.61   89.19
   2   1   0  869.41   89.19
  -2   1   0  988.90   89.19
   2  -1   0  960.00   89.29
   2  -1   0 1070.49   89.29
   2  -1   0 1010.10   89.19
  -2  -1   0 1078.69   89.29
  -2   1  -1  822.82   71.19
   2   1   1  783.02   71.09
   2   1   1  726.73   71.09
   2  -1   1  840.12   71.09
  -2  -1  -1  731.83   71.09
   2  -1   1  835.72   71.09
   2   1   2   59.49    5.70
   2   1   2   62.19    5.70
   2  -1   2   56.49    5.70
  -2  -1  -2   60.69    5.70
   2  -1   2   65.69    5.60
  -2  -1  -2   64.09    5.70
   2  -1   2   67.09    5.60
  -2   1  -3  234.48   21.30
   2   1   3  241.58   21.30
   2  -1   3  231.28   21.30
  -2  -1  -3  231.28   21.20
  -2  -1  -3  236.78   21.30
   2   1   4    7.40    0.80
  -2   1  -4    8.20    1.10
   2  -1   4    9.40    1.10
  -2  -1  -4    8.50    1.10
  -2  -1  -4    9.50    1.10
   2   1   5   68.59    6.00
   2   1   5   67.29    6.20
  -2   1  -5   72.49    6.30
   2   1   5   67.39    6.20
  -2  -1  -5   64.39    6.20
  -2  -1  -5   67.99    6.00
   2  -1   5   63.19    6.10
  -2  -1  -5   55.39    6.20
   2  -1   5   66.59    6.20
  -2   1  -6  241.78   21.50
   2   1   6  263.67   21.30
   2   1   6  233.58   21.50
   2  -1   6  223.18   21.50
  -2  -1  -6  212.48   21.30
  -2  -1  -6  241.38   21.50
   2   1   7    0.80    0.30
  -2   1  -7    1.10    0.60
   2   1   7    0.50    0.60
  -2  -1  -7    1.70    0.70
  -2  -1  -7    1.00    0.30
   2  -1   7    1.00    0.50
   2   1   8  370.76   34.00
  -2   1  -8  374.46   34.10
   2   1   8  361.56   33.70
  -2  -1  -8  324.67   33.70
   2  -1   8  405.56   34.10
  -2  -1  -8  416.56   34.20
  -2   1  -9    0.40    0.90
   2   1   9   -0.20    0.70
   2  -1   9    0.30    0.70
  -2  -1  -9   -0.30    0.90
  -2  -1  -9    0.50    0.40
   2   1  10  178.58   16.70
  -2  -1 -10  180.28   16.90
  -2   1 -11   21.00    3.20
   2   1  11   20.80    2.90
  -2  -1 -11   22.30    3.30
   2  -1  11   20.80    3.00
   2   1  12   87.79    9.30
  -2   1 -12   98.09    9.60
   2  -1  12   98.39    9.40
  -2  -1 -12  100.19    9.70
  -2   1 -13   -2.40    2.10
   2   1  13    0.00    1.50
   2  -1  13    0.10    1.60
  -2  -1 -13   -2.30    2.20
  -2   2  14   94.19   10.00
   2   2 -14   98.89   10.30
  -2  -2  14  112.29   10.20
  -2   2  13   -1.00    1.20
   2   2 -13    0.50    1.50
  -2  -2  13    3.00    1.40
   2   2 -12   52.79    6.10
  -2   2  12   67.19    6.10
  -2  -2  12   51.39    6.00
   2  -2 -12   65.59    6.20
   2   2 -11    2.00    1.10
  -2   2  11    2.40    1.00
   2  -2 -11    2.80    1.10
   2  -2 -11    2.00    0.80
  -2   2  10   91.09    8.50
   2   2 -10   89.09    8.50
   2  -2 -10   74.99    8.20
   2  -2 -10   91.19    8.50
  -2  -2  10  102.59    8.60
  -2   2   9    0.60    0.70
   2   2  -9    0.80    0.70
  -2   2   9    0.20    0.60
   2  -2  -9    1.00    0.70
   2  -2  -9   -0.40    0.50
  -2  -2   9    1.30    0.80
   2   2  -8  165.88   15.20
  -2   2   8  165.48   15.30
  -2   2   8  184.98   15.10
  -2  -2   8  168.48   15.30
   2  -2  -8  155.68   15.10
   2  -2  -8  156.18   15.20
   2   2  -7   68.09    6.40
   2   2  -7   58.29    6.30
  -2   2   7   68.99    6.50
   2  -2  -7   67.09    6.40
  -2  -2   7   73.29    6.50
   2  -2  -7   77.59    6.40
  -2  -2   7   68.79    6.40
   2   2  -6   46.70    4.00
  -2   2   6   44.60    4.00
  -2   2   6   36.30    3.90
   2   2  -6   47.20    3.90
   2  -2  -6   38.20    4.00
   2  -2  -6   48.70    4.00
   2  -2  -6   39.70    4.00
  -2  -2   6   34.00    3.90
  -2  -2   6   42.30    4.10
  -2   2   5    7.10    0.90
   2   2  -5    6.70    1.00
   2   2  -5    8.40    0.90
  -2   2   5    6.30    0.80
  -2   2   5    7.20    0.90
  -2  -2   5    8.10    1.00
   2  -2  -5    6.60    1.00
  -2  -2   5    7.70    0.90
   2   2  -4   57.99    6.30
   2   2  -4   62.09    6.30
   2   2  -4   74.49    6.30
   2  -2  -4   77.09    6.40
  -2  -2   4   69.99    6.30
   2  -2  -4   71.19    6.30
   2   2  -3    0.10    0.20
   2   2  -3    0.00    0.10
  -2   2   3    0.10    0.10
   2   2  -3    0.30    0.20
  -2   2   3    0.10    0.10
  -2   2   3   -0.30    0.20
   2  -2  -3    0.20    0.20
   2  -2  -3   -0.10    0.20
   2   2  -2  340.17   31.50
  -2   2   2  347.47   31.50
   2   2  -2  396.46   31.50
  -2   2   2  302.77   31.50
  -2   2   2  345.57   31.50
   2   2  -2  320.27   31.50
   2   2  -2  350.26   31.50
   2  -2  -2  363.16   31.50
  -2  -2   2  379.66   31.50
   2  -2  -2  351.66   31.50
   2   2  -1  705.23   57.89
   2   2  -1  649.34   57.89
  -2   2   1  659.23   57.89
   2   2  -1  732.73   57.99
  -2   2   1  625.84   57.79
  -2   2   1  552.14   57.79
  -2  -2   1  729.23   57.89
   2  -2  -1  597.24   57.89
   2  -2  -1  536.85   57.79
  -2  -2   1  643.84   57.89
  -2   2   0 2347.86  206.28
   2   2   0 2029.10  206.18
  -2   2   0 2369.06  206.38
   2   2   0 2197.58  206.28
   2   2   0 2219.38  206.38
  -2   2   0 2398.86  206.48
   2  -2   0 2448.85  206.38
   2  -2   0 2301.17  206.28
  -2  -2   0 2317.57  206.48
   2   2   1   41.00    3.50
  -2   2  -1   38.70    3.40
   2   2   1   39.40    3.40
   2   2   1   38.60    3.40
   2  -2   1   35.90    3.40
  -2  -2  -1   35.50    3.40
  -2  -2  -1   35.70    3.40
   2  -2   1   35.80    3.40
   2  -2   1   34.70    3.50
  -2   2  -2 3216.68  257.17
   2   2   2 2433.46  257.47
  -2   2  -2 2872.11  257.57
   2   2   2 2952.80  257.37
   2   2   2 2372.46  257.37
   2  -2   2 3117.09  257.17
  -2  -2  -2 2944.41  257.37
   2  -2   2 2965.30  257.77
  -2   2  -3  270.37   25.80
   2   2   3  293.77   25.70
   2   2   3  260.67   25.70
   2   2   3  297.67   25.70
  -2  -2  -3  299.47   25.70
  -2   2  -4 1226.28  131.09
  -2   2  -4 1573.64  131.09
   2   2   4 1562.74  130.89
   2   2   4 1575.04  131.09
   2  -2   4 1476.35  131.09
  -2  -2  -4 1486.85  131.09
  -2  -2  -4 1289.87  131.09
  -2   2  -5    4.80    0.80
   2   2   5    4.80    0.80
   2   2   5    5.60    0.60
  -2  -2  -5    5.20    0.70
   2  -2   5    4.20    0.80
  -2  -2  -5    4.90    0.80
  -2  -2  -5    4.80    0.80
  -2   2  -6  882.91   83.89
   2   2   6  984.20   83.69
   2   2   6  919.71   83.79
  -2  -2  -6  955.50   83.69
   2  -2   6  920.51   83.89
  -2  -2  -6  913.81   83.89
  -2   2  -7    5.70    1.00
   2   2   7    4.70    0.70
   2   2   7    5.30    1.00
  -2  -2  -7    5.50    0.70
  -2  -2  -7    4.30    1.00
   2  -2   7    4.90    1.00
  -2   2  -8  193.38   18.30
   2   2   8  184.08   18.00
   2   2   8  231.38   18.30
  -2  -2  -8  204.18   18.40
  -2  -2  -8  178.48   18.00
   2  -2   8  208.18   18.40
  -2   2  -9   -0.40    0.80
   2   2   9    0.70    0.80
  -2  -2  -9    1.30    0.90
  -2  -2  -9   -0.20    0.50
   2  -2   9    0.30    0.80
   2   2  10   58.99    5.50
  -2   2 -10   54.89    5.60
   2  -2  10   44.00    5.40
  -2  -2 -10   57.49    5.70
   2   2  11    5.20    1.50
  -2   2 -11    7.70    1.70
   2  -2  11    4.30    1.50
  -2  -2 -11    6.40    1.80
  -2   2 -12    2.10    1.60
   2   2  12    0.60    1.30
   2  -2  12   -0.50    1.30
  -2  -2 -12    0.40    1.70
  -2   2 -13    0.00    2.00
   2   2  13    0.40    1.70
   2  -2  13    0.80    1.60
  -2  -2 -13    2.50    2.30
   2   3 -14    4.30    2.20
  -2   3  14    3.30    1.90
  -2  -3  14    4.20    1.80
   2   3 -13    4.20    1.70
  -2   3  13    1.40    1.50
  -2  -3  13    4.40    1.50
  -2   3  12  126.19   11.20
   2   3 -12  102.69   11.20
   2  -3 -12  138.39   11.00
  -2  -3  12  100.89   11.20
   2   3 -11   26.10    2.90
  -2   3  11   20.50    2.70
  -2  -3  11   19.50    2.80
   2  -3 -11   21.70    2.50
   2   3 -10  342.17   31.80
  -2   3  10  339.57   31.80
  -2  -3  10  366.36   31.90
   2   3  -9   29.90    2.80
   2   3  -9   25.90    2.60
  -2   3   9   22.70    2.70
   2  -3  -9   23.50    2.60
  -2  -3   9   24.20    2.80
   2   3  -8  954.70  101.39
   2   3  -8 1143.19  101.59
   2   3  -8 1212.38  101.39
   2  -3  -8 1255.77  101.59
  -2  -3   8 1070.09  101.69
  -2   3   7    0.60    0.50
   2   3  -7    0.20    0.30
   2   3  -7   -0.10    0.40
  -2   3   7    0.10    0.40
   2   3  -7   -0.10    0.40
   2  -3  -7    0.50    0.70
  -2  -3   7    0.20    0.60
   2  -3  -7    0.50    0.40
  -2   3   6  801.72   80.09
  -2   3   6  903.51   80.09
  -2  -3   6  791.72   80.09
  -2  -3   6  945.21   80.19
   2  -3  -6  881.71   80.19
   2  -3  -6 1012.20   80.09
  -2   3   5    2.10    0.40
   2   3  -5    1.70    0.50
   2   3  -5    3.50    0.50
   2   3  -5    3.20    0.40
  -2   3   5    2.40    0.50
  -2  -3   5    3.50    0.70
   2  -3  -5    2.70    0.50
  -2  -3   5    1.50    0.40
   2  -3  -5    2.80    0.50
  -2   3   4  986.00  102.09
  -2   3   4 1260.87  102.19
  -2   3   4  986.50  102.09
   2   3  -4 1236.98  102.09
  -2   3   4 1083.79  102.09
   2   3  -4 1256.67  102.29
  -2   3   3   98.79   10.00
   2   3  -3   99.39   10.00
  -2   3   3  115.89   10.10
   2   3  -3  108.89   10.10
  -2  -3   3  121.69   10.10
   2  -3  -3  109.09   10.10
   2  -3  -3  117.69   10.10
  -2  -3   3  114.59   10.10
   2   3  -2 2515.85  204.18
   2   3  -2 2075.39  203.88
  -2   3   2 2116.09  203.88
  -2   3   2 2217.88  203.98
   2   3  -2 2120.49  203.98
  -2   3   2 2474.25  204.28
  -2  -3   2 2219.78  204.18
   2  -3  -2 2186.58  203.98
  -2  -3   2 2425.96  204.08
   2  -3  -2 2309.67  204.08
   2   3  -1  993.40   84.99
  -2   3   1  974.20   84.89
  -2   3   1  990.90   85.09
  -2   3   1  853.31   84.89
   2   3  -1 1022.10   85.09
  -2  -3   1 1044.70   85.19
   2  -3  -1  867.81   84.89
  -2  -3   1  893.51   84.89
   2  -3  -1  934.91   84.89
   2  -3  -1  869.31   84.89
   2   3   0 1580.94  139.79
   2   3   0 1461.15  139.69
  -2   3   0 1604.04  139.79
   2   3   0 1482.35  139.79
  -2   3   0 1407.66  139.69
   2  -3   0 1497.75  139.69
   2  -3   0 1608.94  139.79
  -2  -3   0 1508.25  139.89
  -2  -3   0 1550.34  139.79
  -2  -3   0 1773.92  139.89
   2  -3   0 1599.34  139.79
   2   3   1    3.40    0.40
  -2   3  -1    3.30    0.40
   2   3   1    3.50    0.50
  -2   3  -1    2.50    0.40
   2   3   1    2.60    0.40
   2   3   1    3.20    0.50
  -2  -3  -1    3.70    0.40
   2  -3   1    2.80    0.30
  -2  -3  -1    2.80    0.40
   2  -3   1    2.00    0.40
   2   3   2    0.40    0.20
   2   3   2    1.30    0.30
   2   3   2    0.40    0.30
  -2   3  -2    1.20    0.20
  -2   3  -2    2.40    0.40
  -2  -3  -2    1.00    0.30
   2  -3   2    0.80    0.20
   2  -3   2    1.20    0.30
   2  -3   2    0.40    0.30
  -2   3  -3  124.29   11.60
   2   3   3  137.89   11.50
   2   3   3  119.59   11.60
  -2   3  -3  124.79   11.60
   2   3   3  131.69   11.50
   2  -3   3  106.59   11.50
  -2  -3  -3  141.99   11.50
  -2   3  -4   75.49    8.50
   2   3   4  101.19    8.40
   2   3   4   98.89    8.30
   2   3   4   79.29    8.40
  -2   3  -4   76.59    8.40
   2  -3   4   99.19    8.50
  -2  -3  -4  100.49    8.30
  -2  -3  -4   97.39    8.40
   2   3   5    1.30    0.40
  -2   3  -5    0.70    0.50
   2   3   5    1.90    0.30
  -2  -3  -5    0.50    0.30
  -2  -3  -5    0.70    0.50
   2  -3   5    1.30    0.50
  -2   3  -6  267.07   24.50
   2   3   6  262.87   24.40
  -2  -3  -6  265.77   24.50
   2  -3   6  262.97   24.50
  -2  -3  -6  284.57   24.50
  -2   3  -7    6.00    1.10
   2   3   7    6.40    1.10
   2   3   7    6.10    0.80
  -2  -3  -7    9.90    1.40
   2  -3   7    6.20    1.10
  -2  -3  -7    6.40    1.00
   2   3   8  270.37   24.70
   2   3   8  273.87   24.90
   2  -3   8  256.57   25.00
  -2  -3  -8  273.27   24.70
  -2  -3  -8  291.87   25.00
  -2   3  -9    3.40    1.00
   2   3   9    4.80    1.10
  -2  -3  -9    3.40    0.70
  -2  -3  -9    2.30    1.10
   2  -3   9    4.20    1.10
   2   3  10  334.67   32.00
  -2  -3 -10  368.66   32.20
   2   3  11    0.50    1.20
  -2   3 -11    1.20    1.20
  -2  -3 -11    1.10    1.40
   2  -3  11    0.30    1.20
  -2   3 -12   94.79    9.60
   2   3  12  103.19    9.50
   2  -3  12   91.69    9.50
   2   3  13    1.70    1.70
  -2   3 -13    2.10    2.10
   2  -3  13    0.10    1.70
  -2   4  14   36.80    5.10
   2   4 -14   38.70    5.50
  -2  -4  14   50.79    5.30
   2   4 -13   -0.50    1.60
  -2   4  13   -2.80    1.30
  -2  -4  13    2.30    1.50
  -2   4  12  158.48   15.20
   2  -4 -12  165.78   15.00
  -2  -4  12  164.78   15.40
  -2   4  11   -0.40    0.90
   2   4 -11    0.70    1.10
  -2  -4  11    0.40    1.00
   2  -4 -11    1.00    0.90
  -2   4  10   73.49    7.30
   2   4 -10   70.19    7.00
   2   4 -10   88.09    7.50
   2  -4 -10   79.89    7.30
  -2  -4  10   75.69    7.50
   2   4  -9    7.60    1.00
   2   4  -9    7.30    1.20
   2   4  -9    5.10    0.90
  -2   4   9    7.40    1.20
  -2  -4   9    5.90    1.30
   2  -4  -9    7.40    1.10
   2   4  -8   23.40    2.30
   2   4  -8   26.60    2.60
   2   4  -8   22.90    2.40
  -2   4   8   22.80    2.50
   2  -4  -8   20.20    2.40
  -2  -4   8   26.30    2.70
  -2   4   7    3.00    0.60
   2   4  -7    4.10    0.70
   2   4  -7    2.40    0.60
   2   4  -7    2.80    0.50
  -2  -4   7    4.80    0.90
   2  -4  -7    2.80    0.60
   2   4  -6    1.60    0.50
  -2   4   6    1.10    0.40
  -2   4   6    1.30    0.60
  -2   4   6    1.00    0.40
   2   4  -6    1.20    0.50
   2  -4  -6    1.10    0.60
  -2  -4   6    1.40    0.50
  -2  -4   6    1.50    0.60
   2   4  -5   48.50    4.60
   2   4  -5   49.90    4.50
   2   4  -5   51.29    4.50
   2   4  -5   55.29    4.50
  -2   4   5   50.99    4.50
  -2   4   5   48.00    4.60
  -2   4   5   40.30    4.50
   2  -4  -5   44.70    4.50
   2  -4  -5   49.99    4.50
  -2  -4   5   50.69    4.60
  -2  -4   5   39.20    4.50
   2   4  -4  221.98   20.70
   2   4  -4  220.38   20.70
  -2   4   4  196.58   20.70
  -2   4   4  253.87   20.70
  -2   4   4  254.77   20.70
   2   4  -4  206.28   20.70
   2   4  -4  253.07   20.70
   2  -4  -4  245.18   20.70
  -2  -4   4  219.78   20.70
  -2  -4   4  213.28   20.70
   2   4  -3   13.80    1.30
  -2   4   3   12.00    1.30
  -2   4   3   11.90    1.20
   2   4  -3    9.50    1.20
  -2   4   3   10.60    1.20
   2   4  -3    9.70    1.20
  -2  -4   3   11.70    1.30
   2  -4  -3   13.70    1.20
  -2  -4   3   12.10    1.20
   2   4  -2 1889.01  174.28
   2   4  -2 1980.40  174.38
  -2   4   2 2156.98  174.58
  -2   4   2 1869.21  174.28
   2  -4  -2 1649.83  174.18
   2  -4  -2 2041.90  174.38
  -2  -4   2 1961.20  174.48
   2  -4  -2 1946.71  174.38
  -2   4   1   15.90    1.40
   2   4  -1   11.60    1.40
   2   4  -1   14.80    1.40
  -2   4   1   17.10    1.50
   2   4  -1   13.10    1.40
  -2   4   1   12.50    1.40
  -2  -4   1   17.20    1.50
  -2  -4   1   12.50    1.40
   2  -4  -1   14.80    1.40
   2  -4  -1   16.00    1.50
   2  -4  -1   14.40    1.40
  -2  -4   1   13.70    1.40
   2   4   0 1388.66  113.39
   2   4   0 1319.27  113.29
  -2   4   0 1352.16  113.39
   2  -4   0 1150.28  113.39
   2  -4   0 1352.26  113.29
  -2  -4   0 1173.08  113.39
  -2  -4   0 1079.19  113.29
   2   4   1  221.88   20.90
  -2   4  -1  232.38   20.90
   2   4   1  250.07   21.00
  -2   4  -1  239.08   20.90
  -2  -4  -1  207.18   20.90
   2  -4   1  239.58   20.90
   2  -4   1  217.28   20.90
  -2  -4  -1  245.18   20.90
  -2   4  -2 2635.74  220.48
   2   4   2 2690.93  219.98
   2   4   2 2142.59  219.78
   2   4   2 2045.10  219.88
   2   4   2 2180.48  219.88
  -2  -4  -2 2582.54  220.18
   2  -4   2 2708.53  220.38
   2  -4   2 2574.34  219.88
  -2   4  -3    0.40    0.40
  -2   4  -3    0.00    0.30
   2   4   3   -0.10    0.30
   2   4   3    0.10    0.20
   2   4   3    0.30    0.20
  -2   4  -3    0.30    0.20
   2   4   3    0.10    0.20
   2  -4   3   -0.10    0.30
   2  -4   3   -0.30    0.30
   2  -4   3    0.00    0.10
   2   4   4 1622.54  131.69
   2   4   4 1484.75  131.59
  -2   4  -4 1472.45  131.69
  -2   4  -4 1331.27  131.59
   2  -4   4 1386.76  131.69
   2  -4   4 1476.25  131.59
   2   4   5   -0.10    0.30
  -2   4  -5    0.30    0.40
   2   4   5    0.40    0.40
  -2  -4  -5    0.10    0.40
   2  -4   5    0.70    0.50
  -2   4  -6  561.14   47.20
   2   4   6  454.65   47.10
   2  -4   6  527.65   47.20
  -2  -4  -6  583.04   47.10
  -2  -4  -6  481.45   47.20
   2   4   7    3.90    0.80
   2   4   7    3.20    0.70
  -2   4  -7    4.00    0.90
   2  -4   7    3.20    0.90
  -2  -4  -7    5.90    1.00
  -2  -4  -7    4.70    0.80
   2   4   8  300.77   24.70
  -2   4  -8  239.48   24.60
   2   4   8  300.97   24.40
   2  -4   8  287.27   24.70
  -2  -4  -8  222.38   24.40
   2   4   9   41.30    3.80
  -2   4  -9   34.60    3.80
  -2  -4  -9   33.70    3.50
   2  -4   9   30.10    3.70
   2   4  10   30.30    3.40
  -2   4 -10   33.40    3.60
   2  -4  10   21.50    3.40
  -2  -4 -10   31.50    3.10
  -2   4 -11    1.80    1.30
   2   4  11    3.80    1.20
   2  -4  11    2.10    1.30
  -2   4 -12    1.10    1.60
   2   4  12    0.40    1.50
   2  -4  12   -0.60    1.30
   2   5 -13    2.60    1.60
  -2   5  13    2.40    2.50
  -2   5  13    5.50    1.80
  -2  -5  13    3.80    1.60
   2   5 -12   23.20    3.00
  -2  -5  12   17.30    2.70
   2  -5 -12   18.70    2.70
   2   5 -11   -0.20    0.90
  -2   5  11   -0.50    0.90
  -2  -5  11    0.00    1.10
   2  -5 -11    2.00    0.90
   2   5 -10  172.98   16.70
   2   5 -10  178.98   16.40
  -2  -5  10  191.38   16.90
   2   5  -9    8.80    1.40
   2   5  -9   10.20    1.50
  -2   5   9    9.90    1.50
   2  -5  -9   10.80    1.50
  -2  -5   9   11.10    1.70
  -2   5   8  215.28   21.30
   2   5  -8  246.58   21.20
  -2  -5   8  235.68   21.50
   2  -5  -8  238.58   21.30
  -2   5   7    6.20    1.00
  -2   5   7    5.40    1.10
   2   5  -7    5.60    0.90
   2   5  -7    5.50    0.80
   2  -5  -7    6.30    1.10
  -2  -5   7    6.90    1.20
   2  -5  -7    5.30    0.90
   2   5  -6  773.42   79.29
  -2   5   6  944.31   79.49
   2   5  -6  872.81   79.29
   2  -5  -6  992.10   79.39
   2  -5  -6  760.32   79.29
  -2  -5   6  912.71   79.39
  -2  -5   6  910.31   79.49
   2   5  -5   14.10    1.60
  -2   5   5   13.70    1.80
  -2   5   5   17.90    1.70
   2   5  -5   15.30    1.60
  -2   5   5   19.20    1.80
   2   5  -5   15.30    1.60
  -2   5   5   16.40    1.60
   2   5  -5   18.00    1.80
   2  -5  -5   14.60    1.60
  -2  -5   5   15.10    1.80
   2  -5  -5   16.50    1.70
  -2  -5   5   12.10    1.70
   2   5  -4  856.61   90.69
  -2   5   4 1098.69   90.69
   2   5  -4  990.90   90.59
   2   5  -4 1037.60   90.69
  -2   5   4 1126.49   90.59
   2  -5  -4  959.50   90.69
  -2  -5   4 1118.29   90.69
  -2  -5   4  866.91   90.59
  -2   5   3   40.40    3.60
  -2   5   3   41.30    3.70
   2   5  -3   35.70    3.60
   2   5  -3   32.70    3.60
   2   5  -3   36.90    3.60
   2  -5  -3   38.20    3.60
   2  -5  -3   37.70    3.70
  -2  -5   3   44.30    3.70
  -2  -5   3   37.90    3.70
  -2  -5   3   43.20    3.60
  -2   5   2  924.91   79.29
  -2   5   2  887.01   79.09
  -2   5   2  804.22   79.19
   2   5  -2  904.01   79.19
   2   5  -2  806.52   79.19
  -2  -5   2  860.21   79.19
   2  -5  -2  871.21   79.29
  -2  -5   2  839.02   79.19
  -2  -5   2 1020.50   79.19
   2   5  -1    3.30    0.40
   2   5  -1    3.60    0.50
   2   5  -1    3.30    0.50
  -2   5   1    1.80    0.40
  -2   5   1    2.30    0.40
  -2  -5   1    2.90    0.50
   2  -5  -1    3.10    0.40
  -2  -5   1    2.20    0.50
   2  -5  -1    3.80    0.60
  -2  -5   1    3.30    0.40
   2   5   0  676.93   55.79
  -2   5   0  688.33   55.79
   2   5   0  517.85   55.79
   2   5   0  659.13   55.69
   2  -5   0  532.45   55.69
  -2  -5   0  657.13   55.69
   2  -5   0  703.83   55.79
   2  -5   0  652.73   55.79
  -2  -5   0  547.15   55.79
   2  -5   0  556.44   55.79
  -2   5  -1  297.97   24.40
   2   5   1  243.68   24.30
   2  -5   1  264.07   24.30
   2  -5   1  279.77   24.40
   2  -5   1  230.88   24.40
  -2  -5  -1  302.27   24.30
  -2   5  -2  118.09   11.00
   2   5   2  110.09   11.00
   2   5   2  131.29   10.90
   2   5   2  127.39   10.90
  -2  -5  -2  106.89   11.00
   2  -5   2  127.69   10.90
   2   5   3   12.90    1.60
  -2   5  -3   11.40    1.50
   2   5   3   15.60    1.40
   2   5   3   10.60    1.40
   2   5   3   13.90    1.50
  -2   5  -3   12.50    1.30
   2  -5   3   15.30    1.50
  -2  -5  -3   15.70    1.50
   2  -5   3   13.90    1.30
   2  -5   3   11.40    1.50
  -2   5  -4   97.59   10.00
   2   5   4  114.89   10.00
  -2   5  -4  117.29    9.80
   2   5   4  116.09   10.00
  -2   5  -4  125.99   10.20
   2  -5   4   91.79   10.00
   2  -5   4  103.29    9.80
  -2  -5  -4  105.79   10.00
  -2   5  -5  110.09   10.10
   2  -5   5  105.69   10.10
  -2  -5  -5  110.79   10.00
   2   5   6   35.60    3.40
   2   5   6   34.30    3.30
  -2   5  -6   33.70    3.40
   2  -5   6   28.90    3.40
  -2  -5  -6   36.10    3.30
  -2   5  -7  137.59   12.90
   2   5   7  145.59   12.80
  -2  -5  -7  134.49   12.80
   2   5   8  283.77   23.80
  -2   5  -8  237.88   23.90
   2   5   9    1.10    0.80
  -2   5  -9    0.40    0.90
  -2  -5  -9    0.40    0.70
   2  -5   9    0.50    0.90
   2   5  10  218.38   19.90
   2  -5  10  203.88   20.00
  -2  -5 -10  224.68   19.70
  -2   5 -11    0.70    1.30
   2  -5  11    1.10    1.30
  -2   5 -12   85.79    9.20
   2   5  12  104.79    9.10
   2  -5  12   84.49    9.10
  -2   6  13    5.70    1.90
   2   6 -13    4.00    1.80
  -2   6  13    8.30    2.70
  -2  -6  13    6.20    1.90
   2   6 -12   47.90    5.50
  -2   6  12   48.90    5.40
  -2   6  12   50.69    6.20
   2  -6 -12   60.49    5.40
  -2  -6  12   48.40    5.60
  -2   6  11    4.50    1.30
  -2   6  11    4.90    1.70
  -2  -6  11    4.10    1.50
   2  -6 -11    6.00    1.30
   2   6 -10   53.29    4.80
  -2   6  10   40.70    4.60
   2   6 -10   50.69    4.30
  -2   6  10   43.00    5.10
   2  -6 -10   40.20    4.60
  -2   6   9   16.80    2.40
  -2   6   9   18.20    2.00
   2   6  -9   17.90    2.20
  -2  -6   9   16.00    2.30
   2  -6  -9   12.00    2.00
  -2   6   8   57.59    6.00
   2   6  -8   56.19    5.60
  -2   6   8   65.69    5.70
   2   6  -8   66.89    5.70
  -2  -6   8   58.69    5.90
   2  -6  -8   52.39    5.70
   2   6  -7   57.49    4.70
  -2   6   7   45.80    4.60
   2   6  -7   49.20    4.60
  -2   6   7   47.10    4.90
   2  -6  -7   48.10    4.80
  -2  -6   7   44.20    4.80
   2  -6  -7   50.39    4.70
   2   6  -6   13.40    1.40
   2   6  -6   11.20    1.40
  -2   6   6   14.10    1.70
   2  -6  -6   11.90    1.60
   2  -6  -6   12.30    1.50
  -2  -6   6   10.90    1.60
  -2   6   5   48.10    4.40
   2   6  -5   43.10    4.20
   2   6  -5   52.69    4.40
  -2   6   5   42.00    4.20
  -2  -6   5   45.70    4.30
   2  -6  -5   47.60    4.30
   2  -6  -5   38.80    4.20
  -2  -6   5   44.40    4.40
   2   6  -4  192.68   19.70
   2   6  -4  223.18   19.70
  -2   6   4  221.28   19.70
  -2   6   4  200.08   19.80
  -2   6   4  219.38   19.70
  -2  -6   4  224.58   19.80
   2  -6  -4  242.88   19.80
  -2   6   3   18.00    1.70
  -2   6   3   16.40    1.50
   2   6  -3   13.10    1.60
   2   6  -3   14.50    1.60
   2   6  -3   18.10    1.60
  -2  -6   3   14.50    1.70
   2  -6  -3   16.80    1.60
   2  -6  -3   12.90    1.70
   2   6  -2 1064.79  110.49
  -2   6   2 1057.89  110.39
  -2   6   2 1366.36  110.59
   2   6  -2 1334.77  110.49
  -2  -6   2 1132.69  110.49
   2  -6  -2 1291.77  110.49
  -2  -6   2 1347.57  110.49
   2   6  -1   15.40    1.80
   2   6  -1   21.20    1.80
  -2   6   1   17.40    1.80
  -2   6   1   21.40    1.90
   2  -6  -1   17.30    1.90
  -2  -6   1   14.80    1.80
   2  -6  -1   20.00    1.80
  -2  -6   1   19.00    1.80
   2   6   0 3624.14  294.47
  -2   6   0 2946.61  294.47
  -2  -6   0 2695.83  294.67
  -2  -6   0 3592.84  294.57
   2  -6   0 3500.05  294.67
  -2   6  -1   14.60    1.40
  -2   6  -1   14.10    1.50
   2   6   1   14.60    1.30
   2  -6   1   11.50    1.50
  -2  -6  -1   16.10    1.50
   2  -6   1   14.50    1.40
   2  -6   1   11.20    1.40
  -2  -6  -1   13.80    1.60
   2  -6   1   13.00    1.40
  -2   6  -2 1402.06  120.89
   2   6   2 1355.46  120.99
   2   6   2 1117.69  120.79
   2   6   2 1473.25  120.79
  -2   6  -2 1271.77  120.79
  -2  -6  -2 1439.26  120.89
  -2   6  -3    0.20    0.30
  -2   6  -3    0.40    0.30
   2   6   3    0.70    0.30
   2   6   3    0.50    0.40
   2   6   3    0.80    0.30
   2   6   3    0.60    0.30
  -2   6  -3    0.20    0.50
   2   6   3    0.40    0.50
   2  -6   3    0.90    0.40
   2  -6   3    1.00    0.40
  -2  -6  -3    0.50    0.40
   2  -6   3    0.70    0.20
   2   6   4 1312.47  104.59
   2   6   4 1235.68  104.59
   2   6   4 1193.58  104.59
  -2   6  -4  980.10  104.49
   2   6   4 1140.59  104.79
  -2  -6  -4 1143.69  104.69
   2  -6   4 1192.98  104.79
   2  -6   4 1101.09  104.49
  -2   6  -5   16.70    1.90
   2   6   5   14.20    2.00
   2   6   5   15.40    1.80
   2  -6   5   20.10    2.00
  -2  -6  -5   17.60    1.90
   2   6   6  711.53   66.29
  -2   6  -6  833.72   66.39
   2  -6   6  730.73   66.39
  -2  -6  -6  664.63   66.29
  -2   6  -7   44.00    4.20
   2   6   7   39.30    4.10
  -2  -6  -7   38.10    4.10
   2  -6   7   46.90    4.30
  -2   6  -8  263.17   21.00
  -2  -6  -8  195.38   20.70
   2   6   9    0.90    0.90
  -2  -6  -9    1.70    0.80
   2   6  10   19.80    2.70
  -2   6 -10   24.40    3.00
  -2  -6 -10   18.30    2.50
   2  -6  10   18.30    2.90
  -2   6 -11    2.00    1.40
   2   6  11    3.40    1.50
   2  -6  11    4.60    1.40
   2   6  12    0.60    1.70
  -2   6 -12    0.50    1.50
   2  -6  12    1.30    1.60
  -2   7  13    1.20    2.60
   2   7 -13    2.70    1.80
  -2  -7  13    0.80    1.90
  -2   7  12   54.79    5.50
   2   7 -12   50.59    5.60
  -2   7  12   50.29    6.30
  -2  -7  12   48.10    5.60
   2   7 -11    5.60    1.40
  -2   7  11    5.90    2.00
  -2   7  11    4.50    1.30
  -2  -7  11    5.60    1.60
   2  -7 -11    4.50    1.40
  -2   7  10   61.69    5.80
  -2   7  10   56.59    6.30
  -2  -7  10   57.09    6.00
   2  -7 -10   58.99    5.80
   2   7  -9   17.20    2.10
   2   7  -9   26.00    2.60
  -2   7   9   19.30    2.80
  -2   7   9   20.90    2.30
  -2  -7   9   20.40    2.70
   2  -7  -9   17.80    2.40
  -2   7   8  326.27   30.10
   2   7  -8  339.77   29.80
   2   7  -8  339.07   29.90
  -2  -7   8  321.07   30.00
   2  -7  -8  319.27   29.90
  -2   7   7    1.00    0.50
   2   7  -7    0.90    0.60
  -2   7   7    1.30    0.70
   2   7  -7    1.30    0.50
   2   7  -7    0.20    0.60
  -2  -7   7    1.20    0.70
   2  -7  -7    1.60    0.80
   2  -7  -7    0.90    0.50
  -2   7   6  714.73   67.09
   2   7  -6  664.53   66.89
   2   7  -6  875.51   66.99
  -2  -7   6  679.03   67.09
   2  -7  -6  684.33   66.99
   2  -7  -6  837.82   66.99
  -2   7   5    2.20    0.40
   2   7  -5    1.20    0.50
  -2   7   5    1.20    0.60
   2   7  -5    1.70    0.50
   2  -7  -5    1.80    0.50
   2  -7  -5    2.20    0.60
  -2  -7   5    2.10    0.70
   2   7  -4  850.41   74.49
  -2  -7   4  771.62   74.39
  -2  -7   4  856.91   74.49
  -2   7   3    1.30    0.50
   2   7  -3    1.20    0.40
  -2   7   3    0.90    0.20
   2   7  -3    0.90    0.40
   2   7  -3    0.60    0.40
   2  -7  -3    1.40    0.30
   2  -7  -3    1.20    0.40
   2  -7  -3    0.80    0.60
  -2  -7   3    1.60    0.50
  -2  -7   3    1.20    0.40
  -2   7   2  545.85   47.10
   2   7  -2  524.65   47.10
   2   7  -2  446.06   47.00
   2  -7  -2  544.25   46.90
  -2  -7   2  517.55   47.10
  -2  -7   2  551.34   47.00
   2   7  -1    0.50    0.30
   2   7  -1    0.50    0.30
  -2   7   1    0.30    0.40
   2   7  -1    1.10    0.40
  -2   7   1    0.70    0.30
  -2  -7   1    0.40    0.20
   2  -7  -1    0.80    0.20
   2  -7  -1    0.60    0.30
  -2  -7   1    0.70    0.50
   2  -7  -1    0.50    0.20
   2  -7  -1   -0.30    0.40
  -2  -7   1    1.30    0.40
   2   7   0  160.38   13.90
   2   7   0  140.89   13.90
   2   7   0  161.38   14.00
   2  -7   0  164.78   13.90
   2  -7   0  147.49   13.90
  -2  -7   0  144.39   14.00
  -2  -7   0  155.88   13.90
   2  -7   0  150.98   13.90
  -2   7  -1   11.60    1.40
   2   7   1   11.40    1.50
  -2   7  -1   13.80    1.50
   2   7   1   12.70    1.40
   2  -7   1   13.40    1.40
  -2  -7  -1   12.30    1.50
   2  -7   1   13.20    1.40
   2  -7   1   16.10    1.60
  -2  -7  -1   14.20    1.70
   2   7   2    4.30    0.40
   2   7   2    3.30    0.40
   2   7   2    4.40    0.80
  -2   7  -2    3.10    0.60
  -2   7  -2    4.20    0.60
   2   7   2    2.60    0.50
  -2  -7  -2    2.90    0.60
   2  -7   2    3.80    0.60
   2   7   3  142.69   11.60
  -2   7  -3  108.99   11.60
   2   7   3  119.99   11.80
   2   7   3  110.39   11.50
   2  -7   3  138.59   11.80
   2  -7   3  134.09   11.60
  -2  -7  -3  142.29   11.80
   2   7   4   15.80    1.80
  -2   7  -4   14.50    1.70
  -2   7  -4   11.60    1.50
   2   7   4   16.50    1.50
   2   7   4   15.10    1.50
   2  -7   4   14.10    1.40
   2  -7   4   13.70    1.70
  -2  -7  -4   15.80    1.70
  -2   7  -5    5.40    1.00
  -2   7  -5    6.10    0.90
   2   7   5    7.30    1.20
   2   7   5    8.30    1.00
   2   7   5    8.20    1.10
  -2  -7  -5    7.60    1.10
   2  -7   5    8.20    0.80
   2  -7   5    6.30    1.10
  -2   7  -6  335.67   29.00
   2   7   6  306.37   29.10
   2   7   6  323.77   28.80
   2  -7   6  306.37   29.00
   2   7   7    0.30    0.90
   2   7   7    0.20    0.90
   2   7   7    0.40    0.60
  -2   7  -7    0.80    0.70
  -2  -7  -7    0.20    0.60
   2  -7   7    0.40    0.70
   2   7   8   74.09    7.80
  -2   7  -8   92.39    7.60
  -2  -7  -8   71.79    7.40
   2  -7   8   75.19    7.60
   2   7   9    2.70    1.00
   2   7   9    1.30    1.50
  -2   7  -9    4.20    1.20
  -2  -7  -9    2.80    1.00
   2  -7   9    2.50    1.10
  -2   7 -10   68.49    7.60
   2   7  10   79.59    8.20
   2   7  10   78.69    7.50
  -2  -7 -10   75.69    7.40
   2  -7  10   81.79    7.70
   2   7  11    0.50    1.40
  -2   7 -11    1.00    1.30
   2   7  11    2.90    2.20
   2  -7  11   -1.00    1.30
   2   7  12  146.89   13.80
  -2   7 -12  134.99   13.10
   2  -7  12  125.29   12.90
  -2   8  13   14.80    3.20
   2   8 -13    9.10    2.30
  -2  -8  13   14.00    2.50
   2   8 -12   34.70    4.30
  -2   8  12   37.40    5.10
   2  -8 -12   33.30    4.20
  -2  -8  12   33.10    4.30
  -2   8  11    5.20    1.40
  -2   8  11    6.50    1.90
   2   8 -11    4.40    1.40
  -2  -8  11    5.30    1.70
  -2   8  10   52.69    5.60
  -2   8  10   48.40    5.00
  -2  -8  10   49.00    5.30
   2  -8 -10   51.49    5.20
   2   8  -9    7.30    1.10
   2   8  -9    9.10    1.40
  -2   8   9    8.40    1.30
  -2   8   9   11.40    1.80
  -2  -8   9    8.60    1.60
   2  -8  -9    8.50    1.40
   2   8  -8    7.40    1.00
  -2   8   8    7.90    1.50
   2   8  -8    6.80    1.20
  -2   8   8    8.30    1.20
   2  -8  -8    5.90    1.20
  -2  -8   8    7.40    1.40
   2   8  -7   19.60    1.90
   2   8  -7   15.40    1.70
   2   8  -7   18.40    1.90
  -2   8   7   12.60    2.10
   2  -8  -7   15.50    2.00
   2  -8  -7   13.50    1.90
  -2  -8   7   13.50    2.10
  -2   8   6   11.90    1.80
  -2   8   6   12.60    1.30
   2   8  -6   10.50    1.40
   2   8  -6   10.20    1.50
   2   8  -6   13.20    1.60
   2  -8  -6   13.00    1.50
  -2  -8   6   12.20    1.70
   2  -8  -6   14.60    1.60
  -2   8   5  114.89   10.40
   2   8  -5  125.19   10.50
   2   8  -5  113.79   10.60
  -2  -8   5  117.49   10.70
   2  -8  -5   99.29   10.40
   2  -8  -5  120.69   10.60
  -2   8   4  155.28   14.70
   2   8  -4  168.98   14.90
  -2   8   4  168.28   15.00
   2   8  -4  182.18   14.90
   2   8  -4  174.88   14.90
   2  -8  -4  144.99   14.70
  -2  -8   4  146.09   14.90
  -2  -8   4  152.98   14.80
   2  -8  -4  176.28   14.90
   2   8  -3  107.49    9.60
  -2   8   3   99.69    9.70
   2   8  -3  106.69    9.60
  -2  -8   3  102.29    9.60
  -2  -8   3  103.79    9.60
   2  -8  -3  107.19    9.50
  -2   8   2  385.76   40.90
   2   8  -2  434.36   40.80
   2   8  -2  456.15   40.80
   2   8  -2  477.45   40.80
  -2  -8   2  435.66   40.80
   2  -8  -2  436.16   40.70
  -2  -8   2  490.55   40.80
  -2  -8   2  472.65   40.90
   2  -8  -2  477.65   40.70
   2  -8  -2  452.85   40.80
   2   8  -1  161.88   15.90
   2   8  -1  177.78   15.90
  -2   8   1  176.28   15.80
  -2   8   1  185.38   15.90
  -2  -8   1  174.98   15.90
  -2  -8   1  173.38   15.80
   2  -8  -1  173.88   15.80
   2  -8  -1  167.28   15.80
   2  -8  -1  177.78   15.80
   2   8   0 1161.28  109.19
  -2   8   0 1322.87  109.19
  -2   8   0 1174.78  109.19
   2   8   0 1289.07  109.09
   2  -8   0 1149.19  109.09
  -2  -8   0 1199.78  109.09
   2  -8   0 1268.87  109.09
  -2  -8   0 1219.68  109.19
   2  -8   0 1126.99  109.09
  -2   8  -1   82.69    8.90
   2   8   1  107.39    9.00
  -2  -8  -1  110.49    9.00
   2  -8   1  104.69    8.90
   2  -8   1   84.79    8.80
   2  -8   1   92.39    8.90
   2   8   2  852.71   87.69
  -2   8  -2 1003.60   87.69
   2  -8   2 1067.59   87.59
  -2  -8  -2  950.00   87.69
   2  -8   2  989.80   87.69
  -2   8  -3    1.80    0.50
  -2   8  -3    1.50    0.50
   2   8   3    0.00    0.50
  -2  -8  -3    2.10    0.50
   2  -8   3    1.40    0.50
   2   8   4  765.02   65.19
   2   8   4  629.24   64.89
  -2   8  -4  648.54   64.89
  -2   8  -4  826.12   65.09
   2  -8   4  740.23   64.89
   2   8   5    5.80    0.80
  -2   8  -5    5.70    1.00
   2   8   5    4.60    1.00
   2   8   5    4.60    0.70
  -2   8  -5    5.00    0.70
  -2  -8  -5    6.50    1.00
   2  -8   5    5.80    0.70
   2  -8   5    5.00    1.00
  -2   8  -6  355.36   31.20
  -2   8  -6  351.16   30.90
  -2  -8  -6  339.47   31.20
   2  -8   6  325.47   31.20
   2   8   7   12.10    1.40
  -2   8  -7   12.80    1.70
   2   8   7    7.80    1.60
  -2  -8  -7    7.80    1.40
   2  -8   7    9.00    1.50
   2   8   8   49.40    5.00
  -2  -8  -8   51.59    5.10
   2  -8   8   52.89    5.30
   2   8   9   27.30    2.90
   2   8   9   26.90    3.60
  -2   8  -9   22.50    3.10
  -2  -8  -9   26.20    3.00
   2  -8   9   21.00    3.20
  -2   8 -10   31.80    4.20
   2   8  10   44.30    4.10
   2   8  10   38.90    4.80
  -2  -8 -10   33.90    4.00
   2  -8  10   29.90    4.10
  -2   8 -11    2.00    1.60
   2   8  11    1.40    2.10
   2  -8  11   -0.20    1.40
  -2   9  12   10.40    2.80
   2   9 -12    7.00    2.00
  -2  -9  12   12.60    2.30
   2  -9 -12    6.70    2.00
  -2   9  11   24.10    3.70
   2   9 -11   21.10    3.50
  -2  -9  11   33.70    3.70
   2  -9 -11   27.10    3.60
  -2   9  10  171.08   14.90
   2   9 -10  178.58   15.10
  -2   9  10  130.19   15.20
   2   9  -9    4.50    0.80
   2   9  -9    2.20    1.00
  -2   9   9    0.20    1.40
  -2   9   9    3.50    0.90
   2  -9  -9    2.80    1.10
   2   9  -8  180.18   17.50
  -2   9   8  215.68   17.90
  -2   9   8  197.48   17.50
   2  -9  -8  189.88   17.70
  -2  -9   8  179.28   17.70
   2   9  -7   83.49    6.60
  -2   9   7   65.39    6.90
  -2   9   7   72.39    6.50
  -2  -9   7   66.89    6.80
   2  -9  -7   67.09    6.60
   2  -9  -7   66.59    6.80
  -2   9   6  338.47   32.50
   2  -9  -6  408.56   32.30
   2  -9  -6  345.57   32.50
  -2  -9   6  334.67   32.50
   2   9  -5    4.80    0.80
  -2   9   5    3.90    0.50
  -2   9   5    3.10    0.80
  -2  -9   5    2.80    0.80
   2  -9  -5    3.50    0.50
   2  -9  -5    3.20    0.80
   2   9  -4  675.63   56.69
  -2   9   4  531.65   56.69
  -2  -9   4  617.04   56.59
   2  -9  -4  647.24   56.69
  -2  -9   4  666.53   56.69
   2   9  -3   22.70    2.20
  -2   9   3   20.90    2.30
  -2  -9   3   23.00    2.20
  -2  -9   3   17.70    2.20
   2  -9  -3   21.60    2.20
  -2   9   2  476.85   44.00
   2   9  -2  510.35   43.90
   2   9  -2  468.15   43.90
  -2  -9   2  500.55   43.90
   2  -9  -2  475.25   43.90
   2   9  -1    2.80    0.60
  -2   9   1    3.00    0.70
   2   9  -1    2.70    0.50
  -2  -9   1    3.20    0.50
   2  -9  -1    3.60    0.50
  -2  -9   1    2.40    0.60
   2  -9  -1    1.50    0.50
   2  -9  -1    1.70    0.40
   2   9   0  277.07   26.20
  -2   9   0  296.37   26.20
   2   9   0  318.87   26.00
   2  -9   0  243.58   26.10
  -2  -9   0  299.47   26.00
   2  -9   0  283.97   26.10
  -2  -9   0  300.67   26.20
  -2   9  -1  155.28   14.20
  -2   9  -1  167.78   14.20
   2   9   1  138.59   14.20
  -2  -9  -1  167.18   14.20
   2  -9   1  149.79   14.10
   2  -9   1  151.98   14.10
  -2   9  -2  160.68   14.50
   2   9   2  135.99   14.50
  -2   9  -2  173.48   14.40
  -2  -9  -2  157.38   14.50
   2  -9   2  163.48   14.50
   2   9   3   37.10    4.10
  -2   9  -3   44.10    4.10
  -2  -9  -3   44.90    4.10
   2  -9   3   38.90    3.90
   2  -9   3   40.90    4.00
  -2   9  -4   57.79    4.90
  -2   9  -4   44.90    4.70
   2   9   4   45.50    5.00
   2  -9   4   49.99    4.90
   2  -9   4   53.79    4.70
   2   9   5    8.20    1.00
  -2   9  -5    8.50    1.20
   2   9   5    6.30    1.30
  -2   9  -5   12.00    1.50
   2  -9   5    8.10    1.30
  -2  -9  -5    9.10    1.30
   2   9   6  119.29   10.00
   2   9   6  104.49   10.00
   2   9   6  112.19   10.50
   2  -9   6  104.79   10.30
  -2  -9  -6  106.69   10.20
   2   9   7    2.80    1.20
  -2   9  -7    4.40    1.10
   2   9   7    3.10    0.80
   2  -9   7    3.00    1.00
  -2  -9  -7    3.20    1.00
   2   9   8  125.09   12.90
   2   9   8  155.48   12.50
  -2   9  -8  134.59   12.70
  -2  -9  -8  123.59   12.60
   2   9   9    1.90    1.50
  -2   9  -9    1.50    1.20
  -2  -9  -9   -0.30    1.00
   2  -9   9    0.50    1.20
  -2   9 -10   89.89    9.20
   2   9  10   98.19    9.70
   2  -9  10   95.39    9.30
   2   9  11    6.30    2.60
  -2   9 -11    1.40    1.60
   2  -9  11    3.30    1.70
  -2  10  12   39.60    5.90
   2 -10 -12   39.90    4.90
  -2 -10  12   32.20    4.70
  -2  10  11    3.30    2.10
   2  10 -11    2.10    1.60
  -2 -10  11    5.30    1.70
   2 -10 -11    1.60    1.60
  -2  10  10   32.30    4.60
   2  10 -10   43.90    4.20
  -2 -10  10   32.60    4.10
   2 -10 -10   31.90    4.20
  -2  10   9    7.70    1.90
   2  10  -9    7.80    1.50
   2 -10  -9    8.10    1.60
  -2 -10   9    4.20    1.40
   2  10  -8    5.00    0.90
  -2  10   8    2.90    1.30
   2  10  -8    5.00    1.10
   2 -10  -8    5.20    1.20
  -2 -10   8    4.60    1.30
  -2  10   7   24.30    3.00
   2  10  -7   21.50    2.60
  -2  10   7   25.90    2.40
   2  10  -7   26.50    2.70
  -2 -10   7   22.30    2.90
  -2  10   6   21.60    3.10
   2  10  -6   33.90    3.00
   2 -10  -6   27.80    3.00
  -2 -10   6   29.10    3.10
   2  10  -5   42.30    4.20
  -2  10   5   44.30    4.30
   2 -10  -5   46.30    4.20
  -2 -10   5   36.40    4.20
   2  10  -4   97.19    8.50
  -2 -10   4   85.89    8.50
   2  10  -3   48.60    5.60
   2  10  -3   63.29    5.60
  -2 -10   3   67.19    5.60
   2 -10  -3   59.49    5.60
   2  10  -2  321.87   27.70
   2  10  -2  286.77   27.60
   2 -10  -2  292.17   27.60
  -2 -10   2  318.87   27.70
   2  10  -1   78.19    7.20
  -2  10   1   84.79    7.20
   2  10  -1   65.69    7.00
  -2 -10   1   80.69    7.10
   2 -10  -1   78.79    7.10
  -2 -10   1   76.39    7.00
   2 -10  -1   72.09    6.90
  -2  10   0  323.57   32.20
   2  10   0  339.57   32.30
   2 -10   0  324.97   32.10
   2 -10   0  399.86   32.20
   2 -10   0  390.56   32.10
  -2  10  -1   26.00    2.50
   2  10   1   21.10    2.50
   2 -10   1   25.60    2.40
  -2 -10  -1   20.00    2.50
   2 -10   1   25.10    2.50
   2  10   2  507.25   51.49
  -2  10  -2  647.44   51.49
   2 -10   2  578.94   51.39
  -2 -10  -2  650.93   51.49
   2 -10   2  522.25   51.39
   2 -10   2  513.55   51.39
   2  10   3    4.70    1.00
  -2  10  -3    5.00    1.00
   2 -10   3    5.80    1.00
  -2 -10  -3    5.30    1.00
   2 -10   3    6.20    0.80
   2  10   4  451.75   46.00
  -2  10  -4  613.74   46.00
   2 -10   4  457.65   45.70
  -2  10  -5   13.60    1.70
   2  10   5   12.30    1.80
  -2  10  -5   13.10    1.50
   2 -10   5   10.60    1.30
   2 -10   5    8.00    1.50
  -2 -10  -5    9.90    1.50
   2  10   6  102.59   10.50
   2 -10   6  113.29   10.40
  -2 -10  -6  113.39   10.30
  -2  10  -7   16.30    2.20
   2  10   7   11.90    2.10
  -2 -10  -7   15.30    2.20
   2 -10   7   15.20    2.30
  -2  10  -8   82.49    8.10
   2  10   8   85.89    8.40
  -2 -10  -8   86.19    8.10
   2 -10   8   79.09    8.10
   2  10   9    9.10    2.40
  -2  10  -9    9.10    1.80
  -2 -10  -9   11.20    1.80
   2 -10   9    9.50    1.80
   2  10  10    5.80    2.40
  -2  10 -10    4.90    1.70
   2 -10  10    5.40    1.70
  -2 -10 -10    9.10    1.90
  -2  10 -11    3.20    1.90
   2  10  11    5.40    2.90
   2 -10  11    4.60    1.80
   2  11 -11    6.70    1.90
  -2  11  11   10.20    2.70
   2 -11 -11    6.60    2.10
  -2 -11  11   11.80    2.20
   2  11 -10   42.80    4.90
  -2  11  10   41.00    5.40
   2 -11 -10   48.90    5.10
  -2 -11  10   45.60    5.10
   2  11  -9   40.20    3.90
  -2  11   9   32.70    4.30
  -2 -11   9   31.70    4.00
   2 -11  -9   31.30    4.00
  -2  11   8  225.68   20.60
   2  11  -8  214.18   20.20
  -2 -11   8  220.88   20.50
   2 -11  -8  227.68   20.50
   2  11  -7    5.60    1.10
  -2  11   7    4.10    1.30
   2  11  -7    5.20    1.00
   2 -11  -7    6.60    1.30
  -2 -11   7    5.80    1.30
  -2  11   6  128.09   11.20
  -2 -11   6  114.19   11.10
   2 -11  -6  114.29   11.10
  -2  11   5   21.70    2.60
   2 -11  -5   21.60    2.40
  -2 -11   5   20.40    2.20
  -2 -11   5   18.00    2.40
   2  11  -4  295.27   24.30
   2 -11  -4  264.77   24.30
  -2 -11   4  279.77   24.30
  -2 -11   4  228.88   24.30
   2  11  -3    1.50    0.60
  -2  11   3    2.60    0.80
   2  11  -3    2.20    0.80
  -2 -11   3    2.20    0.70
   2 -11  -3    2.10    0.70
  -2 -11   3    2.70    0.70
   2  11  -2  277.57   27.10
  -2  11   2  278.57   27.30
   2  11  -2  319.57   27.20
   2 -11  -2  312.27   27.20
  -2 -11   2  310.57   27.20
  -2  11   1   41.20    4.60
   2  11  -1   46.20    4.40
   2 -11  -1   54.89    4.60
  -2 -11   1   46.20    4.40
   2 -11  -1   45.20    4.30
   2 -11  -1   45.30    4.30
  -2 -11   1   55.39    4.70
   2  11   0   26.00    3.00
  -2  11   0   27.40    3.00
   2 -11   0   28.40    2.80
   2 -11   0   28.40    2.80
  -2 -11   0   34.10    3.10
   2 -11   0   30.90    2.90
   2  11   1   16.40    1.90
  -2  11  -1   15.20    1.80
   2 -11   1   14.10    1.70
   2 -11   1   14.10    1.70
  -2 -11  -1   12.70    1.80
  -2  11  -2    1.30    0.70
   2  11   2    0.90    0.80
   2 -11   2    3.00    0.90
  -2 -11  -2    0.40    0.70
   2 -11   2    1.50    0.50
   2 -11   2    2.10    0.70
  -2  11  -3   43.40    4.30
   2  11   3   43.50    4.40
  -2 -11  -3   47.20    4.40
   2 -11   3   38.70    4.20
   2  11   4   -0.30    0.80
  -2  11  -4    0.90    0.70
  -2 -11  -4    1.90    0.80
   2 -11   4    1.00    0.50
   2 -11   4    1.00    0.80
  -2  11  -5   62.89    5.50
   2  11   5   51.89    5.60
   2 -11   5   53.69    5.20
   2 -11   5   47.60    5.50
  -2 -11  -5   65.59    5.60
  -2 -11  -6   35.10    3.70
   2 -11   6   31.10    3.70
  -2  11  -7    5.70    1.30
   2  11   7    4.10    1.40
   2 -11   7    6.10    1.40
   2  11   8   61.49    7.60
  -2  11  -8   85.79    7.40
   2 -11   8   65.49    7.30
  -2 -11  -8   81.99    7.40
  -2  11  -9   20.90    3.00
   2  11   9   16.40    3.00
   2 -11   9   18.20    2.70
  -2 -11  -9   23.30    3.20
  -2  11 -10   76.59    8.40
   2  11  10   88.09    9.00
  -2 -11 -10   83.49    8.30
   2  12 -11    5.60    1.90
  -2  12  11    4.80    2.50
   2 -12 -11    6.50    2.20
  -2 -12  11    2.20    2.00
  -2  12  10   35.50    4.90
   2  12 -10   28.90    4.20
   2 -12 -10   35.90    4.40
  -2 -12  10   35.70    4.40
  -2  12   9   23.80    3.20
   2  12  -9   22.00    3.10
  -2 -12   9   22.10    3.30
   2 -12  -9   20.00    2.90
  -2  12   8    7.10    1.80
   2  12  -8    7.10    1.40
   2  12  -8    7.20    1.20
   2 -12  -8    5.10    1.40
  -2  12   7   13.30    2.10
   2  12  -7   13.00    1.90
   2 -12  -7   11.90    1.90
  -2 -12   7   13.10    2.00
   2  12  -6    4.70    1.00
  -2  12   6    2.50    1.10
  -2 -12   6    1.20    1.10
   2 -12  -6    2.00    1.10
  -2  12   5   24.80    3.10
   2 -12  -5   26.40    3.00
  -2 -12   5   31.30    3.10
  -2 -12   5   24.10    2.80
  -2  12   4   26.90    2.80
   2  12  -4   24.90    2.60
  -2 -12   4   19.00    2.60
   2 -12  -4   24.40    2.70
  -2 -12   4   23.50    2.60
   2  12  -3  115.09    9.40
  -2  12   3  103.09    9.40
   2  12  -3   94.99    9.30
  -2 -12   3   90.99    9.20
   2 -12  -3  110.29    9.40
  -2 -12   3   86.19    9.30
  -2  12   2  210.98   23.50
   2  12  -2  289.07   23.40
   2  12  -2  270.87   23.60
   2 -12  -2  253.77   23.50
  -2 -12   2  264.77   23.50
   2  12  -1   23.50    2.80
  -2  12   1   27.20    2.90
  -2 -12   1   28.10    2.90
   2 -12  -1   28.00    2.80
  -2  12   0  274.17   26.60
   2  12   0  298.07   26.60
   2 -12   0  292.67   26.50
  -2 -12   0  299.37   26.60
   2 -12   0  293.77   26.30
  -2  12  -1   29.70    2.90
   2  12   1   27.60    2.80
  -2 -12  -1   20.60    2.80
   2 -12   1   23.40    2.70
   2 -12   1   25.70    2.70
   2  12   2  293.37   23.20
  -2  12  -2  243.28   23.10
  -2 -12  -2  216.08   23.10
   2 -12   2  283.77   23.00
   2 -12   2  228.48   23.00
  -2  12  -3    6.20    1.20
   2  12   3    5.80    1.20
   2 -12   3    5.60    1.10
  -2 -12  -3    7.60    1.30
   2 -12   3    5.50    0.90
  -2  12  -4  299.77   29.20
   2 -12   4  343.27   29.10
   2 -12   4  296.67   29.20
  -2 -12  -4  343.57   29.30
   2 -12   5    3.70    1.20
   2 -12   5    4.50    0.80
  -2 -12  -5    6.00    1.30
   2  12   6  134.09   12.70
   2 -12   6  133.29   12.50
  -2 -12  -6  132.29   12.50
  -2  12  -7    2.80    1.10
   2  12   7    2.50    1.40
   2 -12   7    3.00    1.20
  -2 -12  -7    1.20    1.20
   2  12   8   38.90    4.70
  -2  12  -8   36.10    4.30
  -2 -12  -8   40.70    4.40
   2 -12   8   32.80    4.20
  -2  12  -9   24.70    3.70
   2  12   9   23.70    3.90
  -2 -12  -9   29.60    4.00
   2 -12   9   26.90    3.60
  -2  12 -10   57.09    6.10
   2  12  10   51.09    6.80
  -2 -12 -10   55.49    6.10
   2 -12  10   44.90    5.80
  -2  13  10   75.69    8.70
  -2 -13  10   75.59    8.40
   2 -13 -10   90.49    8.50
   2  13  -9    4.60    1.40
  -2  13   9    5.40    1.90
   2 -13  -9    3.60    1.60
  -2 -13   9    3.40    1.80
   2  13  -8   66.69    6.80
  -2  13   8   67.29    7.20
   2 -13  -8   70.69    7.10
  -2 -13   8   73.79    7.10
  -2  13   7   -0.20    1.20
   2  13  -7   -0.70    0.90
   2 -13  -7   -0.60    1.10
  -2 -13   7   -0.60    1.20
  -2  13   6  117.49   11.30
  -2 -13   6  118.39   11.20
   2 -13  -6  118.99   11.20
   2  13  -5    2.50    0.80
   2 -13  -5    2.90    1.10
  -2 -13   5    3.00    1.10
  -2 -13   5    4.30    0.90
   2  13  -4  195.08   17.10
  -2  13   4  167.88   17.10
  -2 -13   4  192.38   17.00
   2 -13  -4  171.78   17.10
  -2 -13   4  199.38   17.00
   2  13  -3    1.20    0.70
  -2  13   3    0.50    0.80
   2 -13  -3   -0.20    0.60
  -2 -13   3    0.10    0.70
  -2 -13   3    1.50    0.70
   2  13  -2  259.67   21.00
  -2  13   2  200.18   21.00
   2 -13  -2  237.68   21.00
  -2 -13   2  228.58   20.90
  -2 -13   2  219.88   20.70
   2  13  -1    4.90    1.00
  -2  13   1    4.50    1.10
  -2 -13   1    6.90    1.10
   2 -13  -1    3.90    0.90
   2  13   0   39.30    3.90
  -2  13   0   37.40    3.90
   2 -13   0   44.30    3.80
   2 -13   0   33.30    3.50
  -2 -13   0   34.50    3.80
  -2  13  -1   44.40    4.70
   2  13   1   47.60    4.70
   2 -13   1   50.09    4.60
  -2 -13  -1   44.60    4.70
  -2  13  -2   -0.70    0.70
   2  13   2   -0.10    0.70
   2 -13   2    1.10    0.70
  -2 -13  -2    0.50    0.90
   2 -13   2    0.70    0.70
  -2  13  -3   30.60    3.50
   2  13   3   38.60    3.70
  -2 -13  -3   33.10    3.60
   2 -13   3   31.60    3.50
   2 -13   3   31.90    3.40
  -2  13  -4    0.10    0.80
   2  13   4    2.10    1.10
  -2 -13  -4    0.60    0.90
   2 -13   4    0.70    0.90
   2 -13   4    0.20    0.70
  -2  13  -5   -0.20    0.80
   2  13   5    0.20    1.00
   2 -13   5    2.50    1.10
   2 -13   5    1.10    0.70
  -2 -13  -5    0.90    1.10
   2  13   6   10.30    1.90
  -2  13  -6    8.00    1.60
  -2 -13  -6    9.80    1.80
   2 -13   6   12.20    1.80
  -2  13  -7   18.20    2.70
   2  13   7   17.30    2.60
   2 -13   7   16.10    2.40
  -2 -13  -7   16.60    2.50
  -2  13  -8   51.29    5.70
   2  13   8   51.49    6.10
  -2 -13  -8   54.59    5.90
   2 -13   8   52.39    5.60
   2  13   9    2.20    2.40
  -2  13  -9    0.20    1.60
  -2 -13  -9   -1.60    1.80
   2 -13   9    2.30    1.70
   2  14  -9   16.10    2.50
  -2  14   9   24.50    3.30
  -2 -14   9   12.60    2.70
   2 -14  -9   20.70    2.90
   2  14  -8   10.60    1.90
  -2  14   8   10.10    2.20
   2 -14  -8   12.30    2.20
  -2 -14   8   10.40    2.10
   2  14  -7   21.50    2.90
  -2  14   7   22.80    3.40
  -2 -14   7   24.60    3.30
   2 -14  -7   24.00    3.30
   2  14  -6    6.40    1.30
  -2  14   6    5.10    1.40
  -2 -14   6    7.90    1.60
   2 -14  -6    5.40    1.40
  -2  14   5   38.40    4.60
  -2 -14   5   45.80    4.60
   2 -14  -5   43.10    4.60
  -2 -14   5   43.70    4.30
  -2  14   4   23.00    3.20
   2  14  -4   27.70    3.10
   2 -14  -4   30.60    3.20
  -2 -14   4   30.50    3.10
  -2 -14   4   24.90    3.10
   2  14  -3   44.60    4.70
   2 -14  -3   48.50    4.80
  -2 -14   3   48.80    4.50
  -2 -14   3   39.70    4.60
   2  14  -2   56.69    6.10
   2 -14  -2   66.69    6.10
  -2 -14   2   63.89    6.10
  -2  14   1   14.70    2.30
   2  14  -1   17.00    2.20
  -2 -14   1   14.90    2.20
   2 -14  -1   18.10    2.20
   2  14   0  203.28   19.60
   2 -14   0  216.58   19.50
  -2 -14   0  219.38   19.60
   2  14   1   23.90    3.00
   2 -14   1   23.00    2.70
   2  14   2  161.28   14.90
  -2  14  -2  135.79   14.80
   2 -14   2  187.18   14.80
   2 -14   2  144.29   14.70
  -2 -14  -2  175.58   14.90
   2  14   3   -0.10    1.00
  -2  14  -3   -0.40    0.80
   2 -14   3    1.30    0.90
  -2 -14  -3    1.70    1.00
   2 -14   3    1.10    0.80
  -2  14  -4   74.89    6.60
   2  14   4   58.79    6.60
  -2 -14  -4   66.09    6.60
   2 -14   4   69.09    6.50
   2 -14   4   61.69    6.30
   2  14   5   21.90    3.30
  -2  14  -5   22.00    3.00
   2 -14   5   28.10    3.10
  -2 -14  -5   24.30    3.30
   2 -14   5   25.30    2.80
  -2  14  -6   16.90    2.60
   2  14   6   15.70    2.40
  -2 -14  -6   15.80    2.40
  -2  14  -7   15.60    2.30
   2  14   7   13.30    2.50
   2 -14   7   18.00    2.50
  -2 -14  -7   15.30    2.50
   2  14   8   18.00    3.00
  -2  14  -8   13.60    2.50
   2 -14   8   16.20    2.60
  -2 -14  -8   19.80    2.90
  -2  15   8   79.59    8.30
  -2 -15   8   72.39    8.10
   2 -15  -8   84.49    8.20
   2  15  -7    0.50    1.10
  -2  15   7    0.40    1.50
   2 -15  -7   -0.70    1.40
  -2  15   6   84.79    8.50
   2  15  -6   82.29    8.30
   2 -15  -6   90.19    8.50
   2  15  -5    2.10    1.10
  -2  15   5    1.60    1.20
   2 -15  -5    2.00    1.10
  -2 -15   5    2.60    1.40
  -2  15   4  102.39   10.70
   2  15  -4  125.69   10.60
   2 -15  -4  107.69   10.70
   2  15  -3    2.40    1.10
  -2  15   3    1.70    1.10
   2 -15  -3    4.30    1.20
   2  15  -2   98.89    8.90
  -2  15   2   87.49    8.90
   2 -15  -2   91.59    8.90
  -2 -15   2   92.29    8.90
   2  15  -1   66.69    5.90
  -2  15   1   48.90    5.90
  -2 -15   1   56.59    5.90
   2 -15  -1   63.79    5.90
   2  15   0   34.80    3.80
  -2  15   0   28.70    3.80
  -2 -15   0   41.20    3.90
   2  15   1   34.90    3.70
  -2  15  -1   28.00    3.60
   2 -15   1   35.00    3.60
   2  15   2    6.50    1.40
  -2  15  -2    4.80    1.40
   2 -15   2    5.10    1.20
  -2 -15  -2    6.50    1.40
  -2  15  -3   32.30    3.60
   2  15   3   31.30    3.60
   2 -15   3   28.70    3.40
  -2 -15  -3   32.40    3.70
  -2  15  -4    2.60    1.30
   2  15   4    5.70    1.50
   2 -15   4    6.70    1.30
   2 -15   4    7.30    1.50
  -2 -15  -4    3.50    1.40
  -2  15  -5   74.09    7.80
   2  15   5   71.59    7.90
  -2 -15  -5   76.69    7.90
   2 -15   5   77.59    7.50
   2 -15   5   95.19    7.90
  -2  15  -6   42.70    4.60
   2  15   6   34.40    4.90
  -2 -15  -6   41.20    4.90
   2 -15   6   40.70    4.60
   2  15   7    6.40    2.20
  -2  15  -7    2.00    1.60
   2 -15   7    4.00    1.80
  -2 -15  -7    4.00    2.00
  -2  16   7   35.00    4.80
   2 -16  -7   41.80    4.90
  -2  16   6    3.20    1.70
   2  16  -6    1.20    1.20
   2 -16  -6    0.80    1.50
   2  16  -5   23.50    3.10
  -2  16   5   22.60    3.30
   2 -16  -5   22.90    3.40
  -2 -16   5   22.10    3.00
  -2  16   4    9.90    1.80
   2  16  -4    9.00    1.70
   2 -16  -4    7.70    1.70
  -2 -16   4    7.00    1.60
  -2  16   3   10.10    1.80
   2  16  -3    9.20    1.80
   2 -16  -3   11.90    1.80
  -2 -16   3   12.30    1.90
   2  16  -2   18.10    2.90
  -2  16   2   29.70    3.20
   2 -16  -2   19.70    2.90
  -2 -16   2   26.70    3.10
  -2  16   1    8.10    1.70
   2  16  -1    9.00    1.60
   2 -16  -1   13.30    1.80
  -2 -16   1   14.20    1.90
  -2  16   0   57.29    5.70
   2  16   0   51.79    5.60
   2  16   1   -1.20    1.00
  -2  16  -1   -0.60    1.10
  -2 -16  -1    0.30    1.20
   2 -16   1    0.00    1.00
  -2  16  -2  100.39    8.30
   2  16   2   74.09    8.20
  -2 -16  -2   89.99    8.20
   2 -16   2   72.59    8.00
   2  16   3   -0.20    1.20
  -2  16  -3    0.20    1.10
  -2 -16  -3    0.70    1.30
   2 -16   3    1.30    1.20
   2  16   4   62.29    6.70
  -2  16  -4   65.49    6.60
  -2 -16  -4   64.59    6.70
   2 -16   4   67.99    6.60
   2  16   5    3.70    1.60
  -2  16  -5    2.30    1.40
  -2 -16  -5    4.30    1.60
  -2  16  -6   72.59    7.30
   2  16   6   70.09    7.60
  -2 -16  -6   70.29    7.50
  -2  17   6   61.59    6.80
   2 -17  -6   62.49    6.80
  -2  17   5    1.10    1.60
   2  17  -5    2.60    1.30
  -2 -17   5    1.70    1.50
   2 -17  -5    1.60    1.50
  -2  17   4   39.50    4.30
   2  17  -4   33.90    4.00
   2 -17  -4   33.60    4.20
  -2 -17   4   30.90    4.10
   2  17  -3   13.50    2.10
  -2  17   3   12.10    2.20
  -2 -17   3   16.00    2.20
   2 -17  -3   14.80    2.20
   2  17  -2    5.10    1.50
  -2  17   2    9.10    1.80
   2 -17  -2    7.40    1.60
  -2 -17   2    4.40    1.60
  -2  17   1   42.60    4.60
   2  17  -1   37.90    4.50
   2 -17  -1   37.50    4.40
  -2 -17   1   44.60    4.60
   2  17   0    6.90    1.70
  -2  17   0    7.20    1.60
   2 -17   0    6.90    1.50
  -2 -17   0    7.20    1.80
   2  17   1   28.90    3.70
  -2  17  -1   32.60    3.90
   2 -17   1   30.80    3.70
  -2 -17  -1   34.40    4.00
   2  17   2    4.10    1.50
  -2  17  -2    4.40    1.50
   2 -17   2    4.00    1.50
  -2 -17  -2    5.70    1.60
  -2  17  -3   19.60    3.00
   2  17   3   14.90    2.50
  -2 -17  -3   18.00    2.80
   2 -17   3   22.60    3.10
   2  17   4    0.40    1.50
  -2  17  -4    1.60    1.40
   2 -17   4   -0.40    1.40
  -2 -17  -4    0.40    1.70
   2  17   5   38.40    4.90
  -2  17  -5   41.10    4.70
  -2 -17  -5   36.40    5.00
   2  18  -4   20.80    3.10
  -2  18   4   16.80    2.70
   2 -18  -4   19.10    2.70
  -2 -18   4   12.50    2.50
   2  18  -3   14.10    2.30
   2 -18  -3   19.00    2.50
  -2 -18   3   15.20    2.50
   2  18  -2   52.19    5.50
   2 -18  -2   50.39    5.60
  -2 -18   2   51.19    5.70
   2  18  -1   15.50    2.50
  -2  18   1   18.80    2.60
   2 -18  -1   17.90    2.50
  -2 -18   1   15.80    2.60
  -2  18   0   38.30    4.30
   2  18   0   28.40    4.20
   2 -18   0   37.00    4.30
  -2 -18   0   38.30    4.40
   2  18   1    1.90    1.50
  -2  18  -1    3.60    1.60
   2 -18   1    4.70    1.60
  -2 -18  -1    1.90    1.60
  -2  18  -2   61.29    6.10
   2  18   2   52.99    5.90
  -2 -18  -2   57.99    6.20
   2 -18   2   51.79    6.00
   2  18   3    1.80    1.60
  -2  18  -3    1.80    1.70
  -2 -18  -3    0.00    1.60
   2 -18   3    1.00    1.70
  -3   0  14   -1.10    1.50
   3   0 -14   -1.50    1.90
  -3   0  13    0.00    1.30
   3   0 -13   -0.20    1.50
   3   0 -12  145.99   15.40
  -3   0  12  180.88   15.80
   3   0 -12  184.48   15.80
   3   0 -11   -0.30    1.00
  -3   0  11    0.10    0.90
   3   0 -11    0.40    0.60
   3   0 -10  118.19   10.70
  -3   0  10  108.49   11.00
   3   0 -10  123.69   11.00
   3   0  -9   -0.80    0.50
   3   0  -9   -0.10    0.50
  -3   0   9    0.00    0.60
  -3   0   9    0.80    0.60
   3   0  -8  596.04   53.99
   3   0  -8  652.43   53.89
  -3   0   8  545.15   54.09
   3   0  -7   -0.10    0.30
   3   0  -7   -0.30    0.30
  -3   0   7    0.00    0.40
  -3   0   7    0.10    0.40
  -3   0   7    0.20    0.40
  -3   0   6  875.11   87.59
  -3   0   6  904.21   87.59
  -3   0   6 1142.99   87.79
  -3   0   5    0.10    0.30
  -3   0   5    0.20    0.20
  -3   0   5   -0.20    0.20
   3   0  -5    0.20    0.30
   3   0  -5    0.10    0.20
   3   0  -5   -0.20    0.20
   3   0  -4 1497.45  162.28
   3   0  -4 1833.02  162.38
  -3   0   4 1885.91  162.88
  -3   0   4 1873.51  162.48
   3   0  -4 1936.01  162.48
  -3   0   3    0.20    0.10
  -3   0   3    0.20    0.20
  -3   0   3    1.10    0.30
   3   0  -3    0.50    0.20
   3   0  -3    0.00    0.10
   3   0  -3    0.20    0.20
   3   0  -2 2021.20  182.08
  -3   0   2 2113.79  181.98
  -3   0   2 1959.10  181.98
   3   0  -2 1988.10  181.88
   3   0  -1    0.10    0.10
  -3   0   1    0.20    0.20
   3   0  -1    0.30    0.20
  -3   0   1    0.20    0.10
  -3   0   1    0.00    0.10
   3   0  -1    0.20    0.10
  -3   0   0 1272.97  108.39
   3   0   0 1123.99  108.19
  -3   0   0 1287.67  108.29
   3   0   0 1296.37  108.29
  -3   0   0 1193.98  108.09
   3   0   0 1039.40  108.29
   3   0   1    0.20    0.20
   3   0   1    0.00    0.10
   3   0   1    0.00    0.10
  -3   0  -1    0.50    0.20
   3   0   2  144.29   13.20
   3   0   2  126.39   13.10
  -3   0  -2  147.69   13.10
   3   0   2  147.19   13.10
   3   0   2  156.88   13.10
   3   0   3   -0.40    0.20
   3   0   3    0.20    0.20
  -3   0  -4    1.30    0.50
   3   0   4    1.60    0.20
   3   0   4    1.60    0.40
   3   0   4    1.60    0.40
  -3   0  -5    0.00    0.40
   3   0   5   -0.40    0.30
   3   0   5    0.10    0.20
  -3   0  -6  168.28   15.30
   3   0   6  164.78   15.30
   3   0   7    0.30    0.60
  -3   0  -7   -0.10    0.70
   3   0   8  171.88   16.30
  -3   0  -8  182.38   16.40
   3   0   9   -1.70    0.80
  -3   0  -9    1.10    1.00
  -3   0 -10  334.57   30.50
   3   0  10  329.77   30.40
   3   0  11   -2.50    1.10
  -3   0 -11    1.80    1.60
  -3   0 -12   87.59    9.00
   3   0  12   86.39    8.60
  -3   1  14   74.99    8.30
   3   1 -14   93.59    8.70
  -3  -1  14   81.59    8.40
   3   1 -13    0.10    1.50
  -3   1  13    0.70    1.20
   3  -1 -13    0.40    1.60
  -3  -1  13    0.20    1.30
  -3   1  12  149.09   14.10
   3   1 -12  145.29   14.10
   3  -1 -12  144.29   14.00
  -3  -1  12  160.18   14.10
   3   1 -11    9.40    1.20
  -3   1  11    7.80    1.50
   3   1 -11   10.80    1.70
   3  -1 -11    8.50    1.30
   3  -1 -11   10.40    1.60
  -3  -1  11   12.70    1.80
   3   1 -10  231.38   17.80
  -3   1  10  221.98   17.90
   3   1 -10  171.18   17.50
   3  -1 -10  177.38   17.70
   3  -1 -10  183.98   17.60
  -3  -1  10  177.38   17.80
   3   1  -9    0.30    0.60
   3   1  -9    0.70    0.50
  -3   1   9    0.80    0.70
  -3  -1   9    0.20    0.60
  -3  -1   9    0.60    0.70
   3  -1  -9   -0.30    0.60
   3  -1  -9    0.10    0.50
   3   1  -8  111.59   10.40
  -3   1   8  119.09   10.40
  -3   1   8  106.49   10.50
   3   1  -8  124.79   10.30
  -3  -1   8  102.69   10.50
   3  -1  -8  106.59   10.40
   3  -1  -8  117.79   10.40
   3   1  -7   14.60    1.30
  -3   1   7   10.00    1.40
   3   1  -7   13.40    1.40
  -3   1   7    8.60    1.30
  -3   1   7   12.30    1.50
  -3  -1   7   14.10    1.60
   3  -1  -7   13.50    1.50
  -3  -1   7    9.70    1.30
   3  -1  -7   14.60    1.40
  -3   1   6   31.50    3.10
   3   1  -6   36.90    3.20
  -3   1   6   27.50    3.00
  -3   1   6   34.40    3.20
  -3  -1   6   31.60    3.00
  -3  -1   6   36.40    3.20
  -3  -1   6   27.40    3.00
   3  -1  -6   33.30    3.10
  -3   1   5  231.18   20.50
   3   1  -5  228.08   20.40
  -3   1   5  230.48   20.40
   3   1  -5  215.58   20.40
  -3   1   5  207.28   20.40
   3  -1  -5  242.88   20.50
  -3  -1   5  196.08   20.40
   3  -1  -5  241.28   20.50
  -3  -1   5  241.08   20.40
  -3   1   4   26.30    2.70
   3   1  -4   27.80    2.60
  -3   1   4   27.40    2.70
   3   1  -4   30.60    2.80
  -3   1   4   29.20    2.60
   3  -1  -4   25.90    2.70
   3  -1  -4   28.50    2.70
  -3  -1   4   31.80    2.60
   3  -1  -4   31.20    2.70
  -3  -1   4   24.60    2.70
  -3   1   3  221.88   21.20
  -3   1   3  213.38   21.20
  -3   1   3  249.78   21.10
   3   1  -3  246.28   21.10
  -3   1   3  218.48   21.20
   3  -1  -3  256.67   21.20
  -3  -1   3  250.17   21.10
   3  -1  -3  256.47   21.20
  -3  -1   3  197.78   21.20
   3   1  -2  517.75   47.10
  -3   1   2  531.95   47.20
  -3   1   2  545.35   47.20
  -3   1   2  554.14   47.10
  -3  -1   2  591.84   47.10
  -3  -1   2  459.25   47.20
   3  -1  -2  528.25   47.20
   3  -1  -2  520.45   47.20
  -3  -1   2  464.35   47.20
   3   1  -1    0.70    0.10
   3   1  -1    0.80    0.10
   3   1  -1    1.20    0.20
   3   1  -1    0.50    0.20
  -3   1   1    0.80    0.20
  -3   1   1    0.60    0.20
  -3   1   1    0.80    0.10
  -3  -1   1    0.40    0.20
   3  -1  -1    0.90    0.10
   3  -1  -1    0.90    0.20
   3  -1  -1    0.70    0.20
  -3   1   0 2055.09  210.68
   3   1   0 2642.34  210.88
   3   1   0 2374.66  210.68
   3   1   0 2437.36  210.88
  -3   1   0 2451.55  210.78
  -3   1   0 2339.07  210.78
  -3  -1   0 2040.70  210.88
   3  -1   0 2451.25  210.98
  -3  -1   0 2430.56  210.68
   3  -1   0 2329.87  210.68
   3  -1   0 2198.78  210.68
   3   1   1   28.60    2.60
  -3   1  -1   26.30    2.60
  -3   1  -1   29.90    2.50
   3   1   1   30.40    2.60
   3   1   1   27.80    2.60
   3  -1   1   25.60    2.60
  -3  -1  -1   27.70    2.60
  -3  -1  -1   24.30    2.60
   3  -1   1   25.80    2.60
   3  -1   1   28.40    2.50
   3   1   2 1077.69  106.99
   3   1   2 1236.58  107.09
  -3   1  -2 1310.07  107.09
   3  -1   2 1182.28  106.99
  -3  -1  -2 1229.28  106.99
   3  -1   2 1034.50  107.09
   3  -1   2 1254.47  107.09
  -3   1  -3  329.17   30.00
   3   1   3  331.77   29.90
  -3  -1  -3  326.07   29.90
   3  -1   3  326.47   30.00
   3  -1   3  344.07   29.80
   3  -1   3  330.77   29.80
   3   1   4 1621.64  145.39
  -3   1  -4 1658.03  145.39
   3   1   4 1739.13  145.39
  -3  -1  -4 1442.16  145.39
  -3   1  -5   10.50    1.60
   3   1   5   14.60    1.60
   3   1   5   15.90    1.40
   3  -1   5   13.20    1.60
  -3  -1  -5   14.70    1.40
  -3  -1  -5   12.20    1.70
  -3   1  -6  950.70   93.49
   3   1   6 1035.90   93.49
   3  -1   6 1006.70   93.49
  -3  -1  -6 1116.39   93.59
  -3  -1  -6 1073.19   93.29
   3   1   7    1.10    0.70
   3   1   7    0.70    0.30
  -3   1  -7    0.60    0.70
  -3  -1  -7    1.20    0.30
   3  -1   7    0.50    0.60
  -3  -1  -7    1.20    0.80
   3   1   8  389.66   36.20
  -3   1  -8  402.56   36.30
  -3  -1  -8  404.36   36.30
  -3   1  -9    0.40    1.00
   3   1   9    0.00    0.80
  -3  -1  -9    2.00    1.10
   3  -1   9   -0.20    0.80
  -3   1 -10   89.89    8.10
  -3  -1 -10   66.09    8.00
   3  -1  10   84.69    7.90
  -3   1 -11    3.60    1.60
   3   1  11    1.40    1.30
   3  -1  11    0.30    1.20
  -3  -1 -11    3.50    1.60
  -3   1 -12    8.60    2.20
   3   1  12    3.50    1.70
   3  -1  12    7.50    1.80
  -3  -1 -12    6.60    2.20
   3   2 -14    7.90    2.20
  -3   2  14    4.80    1.80
  -3  -2  14    3.00    1.90
  -3   2  13    0.20    1.30
   3   2 -13    2.20    1.60
  -3  -2  13    0.20    1.30
   3   2 -12    1.50    1.30
  -3   2  12    1.00    1.10
   3  -2 -12    2.80    0.90
  -3  -2  12    1.20    1.10
   3   2 -11    0.30    0.60
   3   2 -11    0.00    0.90
  -3   2  11    0.00    0.90
   3  -2 -11    0.50    0.70
  -3   2  10   72.89    6.70
   3   2 -10   62.89    6.40
   3   2 -10   77.99    6.70
  -3  -2  10   79.89    6.80
   3  -2 -10   64.49    6.40
   3  -2 -10   57.89    6.60
   3   2  -9   19.70    2.20
  -3   2   9   24.50    2.50
   3   2  -9   22.70    2.40
   3  -2  -9   21.70    2.40
  -3  -2   9   21.40    2.60
   3  -2  -9   20.70    2.30
   3   2  -8  519.05   44.90
  -3   2   8  499.05   45.00
   3   2  -8  516.95   45.00
  -3  -2   8  486.75   45.10
   3  -2  -8  526.85   44.90
   3  -2  -8  436.36   45.00
   3   2  -7   10.40    1.30
   3   2  -7   11.50    1.20
  -3   2   7   12.50    1.40
  -3   2   7   11.00    1.40
  -3   2   7    8.40    1.30
  -3  -2   7   10.40    1.50
  -3  -2   7   12.60    1.30
   3  -2  -7   12.40    1.30
   3  -2  -7   10.90    1.30
  -3  -2   7    8.30    1.20
  -3   2   6  750.82   74.49
  -3   2   6  829.92   74.59
  -3  -2   6  888.11   74.59
  -3  -2   6  852.81   74.49
   3  -2  -6  800.02   74.59
  -3  -2   6  844.52   74.69
  -3   2   5   34.10    3.30
  -3   2   5   29.70    3.30
   3   2  -5   30.00    3.40
   3   2  -5   41.40    3.30
  -3  -2   5   40.30    3.40
  -3  -2   5   31.80    3.30
   3  -2  -5   34.30    3.40
   3  -2  -5   39.80    3.30
  -3  -2   5   34.60    3.30
  -3   2   4 1755.32  175.38
   3   2  -4 2125.89  175.38
   3  -2  -4 1659.03  175.08
  -3  -2   4 2252.07  175.38
   3   2  -3    0.80    0.30
  -3   2   3    0.70    0.30
   3   2  -3    0.90    0.20
  -3   2   3    0.30    0.30
  -3   2   3    0.60    0.20
   3   2  -3    0.90    0.30
  -3  -2   3    0.30    0.30
  -3  -2   3    0.50    0.20
   3  -2  -3    0.80    0.30
   3  -2  -3    0.30    0.20
   3   2  -2 3415.16  294.77
   3   2  -2 3217.38  294.97
  -3   2   2 3499.05  294.87
  -3   2   2 3253.87  295.07
   3  -2  -2 3024.40  294.87
   3  -2  -2 3294.17  295.07
   3  -2  -2 3451.45  294.87
  -3  -2   2 3050.79  294.97
   3   2  -1    0.00    0.10
  -3   2   1    0.20    0.10
  -3   2   1    0.00    0.10
   3   2  -1    0.90    0.20
   3   2  -1    0.30    0.20
  -3  -2   1    0.20    0.20
   3  -2  -1    0.20    0.10
   3  -2  -1    0.10    0.20
   3  -2  -1    0.10    0.10
  -3   2   0  645.24   61.39
  -3   2   0  758.32   61.39
  -3   2   0  667.63   61.49
   3   2   0  658.43   61.49
   3  -2   0  671.13   61.39
  -3  -2   0  650.83   61.49
   3  -2   0  690.13   61.39
   3  -2   0  719.43   61.49
  -3   2  -1   16.40    1.50
   3   2   1   17.80    1.60
   3   2   1   17.00    1.60
   3   2   1   16.70    1.50
  -3  -2  -1   15.50    1.60
  -3  -2  -1   15.20    1.50
   3  -2   1   15.80    1.50
  -3  -2  -1   14.80    1.50
   3  -2   1   13.30    1.60
   3  -2   1   15.70    1.50
   3   2   2  750.72   58.69
   3   2   2  709.23   58.69
  -3   2  -2  750.62   58.59
   3   2   2  580.34   58.69
  -3   2  -2  590.64   58.69
  -3  -2  -2  727.23   58.69
   3  -2   2  549.15   58.69
   3  -2   2  637.24   58.59
  -3  -2  -2  607.64   58.69
   3  -2   2  613.54   58.69
   3   2   3  200.58   17.20
  -3   2  -3  190.68   17.30
   3   2   3  165.18   17.30
   3  -2   3  197.38   17.30
   3  -2   3  189.38   17.10
  -3  -2  -3  200.58   17.30
  -3  -2  -3  188.78   17.20
   3   2   4   16.00    1.70
   3   2   4   17.60    1.80
   3   2   4   14.60    1.50
  -3   2  -4   16.00    1.80
  -3  -2  -4   17.00    1.60
   3  -2   4   16.10    1.70
  -3  -2  -4   15.50    1.70
   3  -2   4   14.00    1.70
  -3   2  -5   20.90    2.20
   3   2   5   21.20    2.20
   3   2   5   22.60    2.00
  -3  -2  -5   16.70    2.20
  -3  -2  -5   20.30    2.00
   3   2   6   96.89    8.20
  -3   2  -6   80.39    8.20
   3   2   6   77.49    7.90
  -3  -2  -6   96.69    8.30
  -3   2  -7    8.20    1.40
   3   2   7    7.40    1.00
   3   2   7   10.40    1.50
  -3  -2  -7    8.70    1.00
   3  -2   7   11.90    1.50
  -3  -2  -7    7.40    1.30
   3   2   8  303.77   27.90
  -3   2  -8  338.37   28.30
   3   2   8  287.77   28.20
  -3  -2  -8  302.27   28.30
   3  -2   8  314.87   28.20
  -3   2  -9    5.30    1.30
   3   2   9    5.20    1.20
   3  -2   9    5.80    1.30
  -3  -2  -9    7.80    1.50
  -3  -2  -9    6.90    1.00
   3   2  10   76.19    8.50
  -3   2 -10   91.99    8.70
  -3  -2 -10   85.79    8.70
   3  -2  10   97.49    8.60
   3   2  11    0.80    1.40
  -3   2 -11    2.30    1.50
  -3  -2 -11   -0.90    1.60
   3  -2  11   -0.90    1.20
   3   2  12  144.79   13.60
  -3   2 -12  151.78   13.80
  -3  -2 -12  150.48   13.90
   3  -2  12  127.29   13.60
   3   3 -14   48.50    6.10
  -3   3  14   43.70    5.70
  -3  -3  14   61.99    6.00
  -3   3  13    1.20    1.40
   3   3 -13    0.60    1.60
  -3  -3  13   -0.30    1.30
  -3   3  12  145.79   11.90
   3  -3 -12  120.19   11.60
  -3  -3  12  110.89   11.90
  -3   3  11    2.30    1.00
   3   3 -11    3.40    0.70
   3   3 -11    1.70    1.10
   3  -3 -11    1.50    0.90
  -3  -3  11    2.90    1.10
  -3   3  10  278.97   26.00
   3   3 -10  312.67   26.10
   3   3 -10  241.38   25.80
  -3  -3  10  313.27   26.20
   3   3  -9   79.19    6.80
   3   3  -9   76.59    7.00
  -3   3   9   74.29    7.00
  -3  -3   9   75.59    7.20
   3  -3  -9   63.09    6.90
   3   3  -8  289.87   25.90
  -3   3   8  275.47   25.90
  -3  -3   8  290.97   26.10
  -3   3   7    0.70    0.50
   3   3  -7    0.30    0.40
  -3   3   7    1.10    0.50
  -3   3   7    1.20    0.60
   3   3  -7    1.90    0.40
  -3  -3   7    1.70    0.70
   3  -3  -7    0.70    0.40
  -3  -3   7    1.00    0.50
  -3   3   6    5.20    0.80
   3   3  -6    6.20    0.80
  -3   3   6    4.50    0.70
  -3   3   6    5.40    0.70
   3  -3  -6    5.10    0.80
  -3  -3   6    4.30    0.70
  -3  -3   6    3.90    0.80
  -3   3   5   24.80    2.80
   3   3  -5   25.90    2.90
   3   3  -5   34.00    2.90
  -3   3   5   30.50    2.90
  -3  -3   5   35.30    3.00
  -3  -3   5   29.70    2.80
   3  -3  -5   26.00    2.90
   3  -3  -5   34.30    2.90
   3   3  -4  120.09   12.50
   3   3  -4  125.59   12.50
  -3   3   4  118.19   12.50
   3   3  -4  153.58   12.50
  -3   3   4  136.99   12.50
  -3   3   4  159.38   12.60
  -3   3   4  144.19   12.50
   3  -3  -4  125.79   12.50
  -3  -3   4  158.48   12.60
   3   3  -3    5.30    0.70
  -3   3   3    3.50    0.60
   3   3  -3    3.70    0.70
  -3   3   3    6.00    0.70
  -3   3   3    4.30    0.60
   3   3  -3    5.30    0.60
   3   3  -3    4.60    0.50
  -3  -3   3    4.10    0.60
  -3  -3   3    5.00    0.60
   3  -3  -3    6.00    0.70
   3   3  -2  820.52   70.19
  -3   3   2  734.83   70.09
   3   3  -2  814.12   70.09
   3   3  -2  699.53   70.19
  -3   3   2  785.62   70.09
   3  -3  -2  710.33   70.09
   3  -3  -2  862.21   70.09
  -3  -3   2  772.72   70.19
   3  -3  -2  811.32   70.09
   3   3  -1  161.38   14.70
  -3   3   1  155.58   14.70
   3   3  -1  162.98   14.70
  -3   3   1  163.28   14.70
  -3   3   1  150.88   14.70
  -3  -3   1  176.88   14.80
   3  -3  -1  156.48   14.70
  -3  -3   1  176.98   14.80
   3  -3  -1  153.98   14.70
   3  -3  -1  169.68   14.70
   3   3   0 2356.26  218.28
  -3   3   0 2401.36  218.18
   3   3   0 2411.96  218.28
   3   3   0 2016.80  218.08
  -3   3   0 2688.93  218.18
  -3   3   0 2601.74  218.38
   3  -3   0 2506.25  218.18
   3  -3   0 2461.15  218.08
  -3  -3   0 2340.57  218.18
  -3  -3   0 2447.76  218.28
  -3   3  -1   30.70    2.60
  -3   3  -1   27.80    2.60
   3   3   1   30.50    2.60
   3   3   1   25.00    2.60
   3   3   1   23.20    2.60
   3  -3   1   28.10    2.50
  -3  -3  -1   28.90    2.60
   3  -3   1   23.90    2.70
  -3  -3  -1   29.60    2.60
  -3   3  -2 2230.98  185.58
   3   3   2 1773.12  185.58
   3   3   2 2120.99  185.58
   3  -3   2 2140.09  185.58
  -3  -3  -2 2049.09  185.78
   3   3   3    4.00    0.50
   3   3   3    4.10    0.70
  -3   3  -3    4.50    0.40
  -3   3  -3    2.10    0.50
   3   3   3    3.50    0.60
   3   3   3    3.60    0.60
   3  -3   3    2.20    0.50
  -3  -3  -3    4.30    0.60
   3  -3   3    4.00    0.70
   3  -3   3    3.40    0.40
  -3   3  -4 1503.55  135.29
   3   3   4 1456.05  135.19
   3   3   4 1502.45  135.19
  -3  -3  -4 1465.05  135.19
   3  -3   4 1488.85  135.29
  -3  -3  -4 1536.35  135.29
   3  -3   4 1565.14  135.29
   3   3   5   13.50    1.50
  -3   3  -5   13.40    1.60
   3   3   5   11.30    1.30
  -3  -3  -5   14.10    1.60
   3   3   6  819.72   72.69
  -3   3  -6  874.71   72.79
   3  -3   6  772.32   72.69
  -3  -3  -6  754.92   72.69
   3   3   7    0.40    0.60
  -3   3  -7    0.30    0.70
   3   3   7    0.20    0.40
  -3  -3  -7    0.10    0.70
  -3  -3  -7    0.50    0.50
   3  -3   7    0.30    0.70
  -3   3  -8  238.28   20.60
   3   3   8  267.97   20.60
   3   3   8  199.58   20.30
  -3  -3  -8  212.78   20.30
  -3  -3  -8  205.88   20.60
  -3   3  -9    0.00    1.00
   3   3   9   -0.70    0.80
  -3  -3  -9   -0.40    0.60
   3  -3   9   -0.20    0.90
  -3  -3  -9   -0.70    1.00
  -3   3 -10   71.39    7.00
  -3  -3 -10   73.19    7.10
   3  -3  10   63.49    6.90
   3   3  11    0.20    1.20
  -3   3 -11    0.20    1.30
  -3  -3 -11   -0.90    1.50
   3  -3  11   -1.50    1.10
  -3   3 -12    9.20    2.10
   3   3  12    8.40    2.00
   3  -3  12    7.50    1.90
  -3   4  14    5.70    1.90
   3   4 -14    0.90    2.20
  -3   4  14    5.10    2.80
  -3  -4  14    4.90    2.10
  -3   4  13    4.70    1.60
   3   4 -13    3.10    1.60
  -3  -4  13    2.60    1.50
   3   4 -12   20.10    2.80
   3  -4 -12   15.40    2.30
  -3  -4  12   12.60    2.20
  -3   4  11    1.00    1.00
   3   4 -11    1.30    1.00
   3   4 -11    0.80    0.60
  -3  -4  11    1.10    1.10
   3  -4 -11    1.40    0.80
   3   4 -10  147.69   13.90
  -3   4  10  186.08   14.30
   3  -4 -10  139.49   14.10
  -3  -4  10  140.99   14.30
  -3   4   9    1.80    0.70
   3   4  -9    2.00    0.80
   3   4  -9    3.40    0.90
   3   4  -9    1.60    0.50
   3  -4  -9    2.40    0.70
  -3  -4   9    1.40    0.80
  -3   4   8  400.26   42.20
   3   4  -8  489.45   42.30
  -3  -4   8  495.55   42.40
   3  -4  -8  483.45   42.20
  -3   4   7   22.80    2.40
   3   4  -7   24.00    2.40
   3   4  -7   19.00    2.40
   3   4  -7   23.10    2.30
   3  -4  -7   26.30    2.50
  -3  -4   7   21.70    2.40
  -3  -4   7   22.50    2.50
  -3   4   6 1000.70  108.79
  -3   4   6 1214.18  108.89
   3   4  -6 1071.59  108.79
  -3   4   6 1340.77  108.89
   3   4  -6 1309.27  108.89
   3   4  -6 1232.98  108.89
  -3   4   6 1189.08  108.89
   3  -4  -6 1246.28  108.89
  -3  -4   6 1277.77  108.99
   3   4  -5    4.00    0.60
   3   4  -5    4.90    0.80
  -3   4   5    3.50    0.60
   3   4  -5    3.80    0.60
  -3   4   5    3.80    0.60
  -3   4   5    3.60    0.60
  -3  -4   5    2.60    0.60
   3  -4  -5    4.70    0.70
   3  -4  -5    3.80    0.60
  -3  -4   5    2.90    0.60
  -3   4   4 1462.65  121.19
  -3   4   4 1315.27  121.19
  -3   4   4 1469.45  121.19
   3   4  -4 1325.17  121.19
   3   4  -4 1481.05  121.29
   3   4  -4 1116.79  121.19
   3  -4  -4 1193.58  121.19
  -3  -4   4 1176.88  121.19
  -3  -4   4 1470.85  121.29
   3  -4  -4 1456.15  121.19
   3   4  -3    4.20    0.70
  -3   4   3    6.10    0.70
   3   4  -3    3.90    0.60
  -3   4   3    3.30    0.60
   3   4  -3    4.80    0.60
  -3  -4   3    5.00    0.60
   3  -4  -3    4.60    0.60
   3  -4  -3    4.50    0.70
  -3  -4   3    4.50    0.70
   3   4  -2 1408.46  147.89
   3   4  -2 1468.75  147.79
  -3   4   2 1667.43  147.99
   3   4  -2 1832.62  148.19
  -3  -4   2 1758.32  148.09
   3  -4  -2 1720.03  147.99
   3  -4  -2 1655.03  147.89
  -3   4   1    0.70    0.20
   3   4  -1    0.60    0.20
   3   4  -1    0.70    0.30
  -3   4   1    0.30    0.20
  -3   4   1    1.00    0.30
   3   4  -1    0.50    0.30
   3  -4  -1    0.90    0.30
   3  -4  -1    0.80    0.30
  -3  -4   1    0.40    0.30
  -3  -4   1    0.60    0.30
   3  -4  -1    0.60    0.20
  -3  -4   1    1.00    0.30
  -3   4   0 1065.49   88.99
   3   4   0  848.42   89.09
   3   4   0  831.72   89.09
   3   4   0  956.60   88.99
  -3   4   0 1107.09   89.09
  -3  -4   0  993.40   89.09
   3  -4   0 1002.30   88.99
  -3  -4   0  992.80   88.99
   3  -4   0 1107.49   89.09
   3   4   1  186.38   18.00
   3   4   1  183.28   18.10
  -3   4  -1  225.58   18.00
   3   4   1  204.98   18.00
   3   4   1  182.08   18.10
  -3  -4  -1  212.78   18.00
   3  -4   1  188.18   18.10
   3  -4   1  212.68   18.00
   3  -4   1  173.78   18.00
   3  -4   1  220.98   18.10
   3   4   2   53.89    5.70
  -3   4  -2   68.59    5.80
   3   4   2   54.69    5.80
  -3   4  -2   68.29    5.70
   3  -4   2   67.99    5.60
  -3  -4  -2   65.09    5.80
   3  -4   2   53.89    5.80
   3   4   3    2.60    0.50
  -3   4  -3    3.80    0.50
   3   4   3    4.60    0.60
   3   4   3    3.40    0.60
   3   4   3    3.60    0.50
  -3   4  -3    3.10    0.60
   3  -4   3    3.00    0.60
   3  -4   3    2.70    0.60
   3  -4   3    3.60    0.40
  -3   4  -4   14.20    1.60
   3   4   4   13.80    1.60
   3  -4   4   13.20    1.60
  -3  -4  -4   16.30    1.60
   3   4   5   59.29    5.30
  -3   4  -5   48.50    5.30
  -3  -4  -5   59.39    5.20
   3  -4   5   55.69    5.40
  -3   4  -6  141.39   12.50
   3   4   6  133.49   12.40
  -3  -4  -6  135.59   12.50
   3  -4   6  135.79   12.50
  -3  -4  -6  127.09   12.30
   3   4   7   -0.20    0.50
   3   4   7    0.10    0.70
  -3   4  -7    0.20    0.70
  -3  -4  -7    1.50    0.60
   3  -4   7    0.70    0.70
  -3  -4  -7    0.00    0.70
  -3   4  -8   44.10    4.30
   3   4   8   38.50    4.20
  -3  -4  -8   36.70    3.90
   3  -4   8   47.10    4.40
   3   4   9    3.30    1.10
  -3  -4  -9    2.10    0.70
  -3   4 -10   80.59    7.90
   3   4  10   81.19    7.80
   3  -4  10   77.29    7.80
  -3   4 -11   13.40    2.30
   3   4  11   14.70    2.20
   3  -4  11   10.30    2.20
  -3   4 -12   63.09    7.40
   3   4  12   79.79    7.20
   3  -4  12   64.99    7.20
  -3   5  13    2.80    2.30
  -3   5  13    0.90    1.40
   3   5 -13   -0.80    1.60
  -3  -5  13    0.00    1.40
   3   5 -12   91.59    8.00
  -3   5  12   74.39    8.40
  -3  -5  12   73.99    8.00
   3  -5 -12   80.49    7.80
   3   5 -11   -1.70    1.00
  -3   5  11    0.10    0.90
  -3   5  11   -2.60    1.40
  -3  -5  11    1.00    1.10
   3  -5 -11    1.60    0.90
   3   5 -10  105.49    9.10
  -3   5  10   90.79    9.40
   3   5 -10   95.19    8.80
  -3   5  10   88.39    9.00
  -3  -5  10  105.69    9.30
   3  -5 -10   92.29    9.00
   3   5  -9    0.00    0.70
   3   5  -9   -0.10    0.40
  -3   5   9   -0.20    0.60
   3   5  -9    0.20    0.80
  -3   5   9    0.20    0.90
  -3  -5   9   -0.50    0.70
   3  -5  -9    0.40    0.70
   3   5  -8  133.79   11.60
  -3   5   8  118.29   11.70
  -3   5   8  133.69   11.90
   3  -5  -8  128.19   11.70
  -3  -5   8  120.89   11.80
   3   5  -7  121.29   11.40
  -3   5   7  125.89   11.60
  -3   5   7  116.09   11.40
   3   5  -7  125.09   11.30
   3  -5  -7  136.99   11.50
   3  -5  -7  124.59   11.40
  -3  -5   7  120.09   11.50
  -3   5   6   33.10    3.30
  -3   5   6   33.40    3.40
   3   5  -6   27.60    3.30
   3   5  -6   35.10    3.30
  -3   5   6   39.90    3.50
   3   5  -6   33.80    3.30
  -3  -5   6   38.00    3.40
   3  -5  -6   35.70    3.40
  -3  -5   6   35.50    3.50
   3   5  -5   11.20    1.20
  -3   5   5    9.50    1.30
   3   5  -5    9.80    1.20
   3   5  -5   13.00    1.40
   3   5  -5   10.00    1.30
  -3   5   5   10.60    1.20
  -3   5   5   11.20    1.30
   3  -5  -5    8.30    1.20
   3  -5  -5   11.40    1.20
  -3  -5   5   12.20    1.40
  -3  -5   5    8.40    1.30
  -3   5   4   99.59    8.80
   3   5  -4   88.79    8.70
   3  -5  -4  104.59    8.70
  -3  -5   4   88.19    8.70
   3  -5  -4   84.99    8.70
  -3  -5   4  105.79    8.80
  -3   5   3  324.97   26.80
   3   5  -3  325.37   26.80
   3   5  -3  263.97   26.80
   3   5  -3  287.97   26.80
   3  -5  -3  304.47   26.80
   3  -5  -3  328.07   26.80
  -3  -5   3  278.27   26.80
   3  -5  -3  260.77   26.80
   3   5  -2   61.99    5.10
  -3   5   2   56.79    5.10
   3   5  -2   50.09    5.10
  -3   5   2   54.29    5.10
   3   5  -2   49.60    5.10
  -3  -5   2   58.29    5.10
   3  -5  -2   46.60    5.10
   3  -5  -2   58.09    5.10
  -3  -5   2   58.19    5.10
   3  -5  -2   56.79    5.10
   3   5  -1  759.52   71.39
  -3   5   1  758.32   71.39
   3   5  -1  755.92   71.39
  -3   5   1  835.72   71.39
   3   5  -1  792.32   71.39
  -3   5   1  931.01   71.49
   3  -5  -1  714.83   71.39
  -3  -5   1  727.93   71.49
   3  -5  -1  862.51   71.39
  -3   5   0 1412.56  133.59
   3   5   0 1288.77  133.59
   3   5   0 1599.34  133.69
  -3  -5   0 1276.57  133.59
   3  -5   0 1453.35  133.59
   3  -5   0 1441.06  133.69
  -3  -5   0 1706.93  133.69
   3  -5   0 1628.34  133.79
  -3  -5   0 1563.74  133.69
   3   5   1    2.10    0.40
  -3   5  -1    2.30    0.50
   3   5   1    3.00    0.50
  -3   5  -1    3.80    0.50
   3  -5   1    2.70    0.50
   3  -5   1    2.00    0.50
   3  -5   1    3.50    0.40
  -3  -5  -1    2.70    0.40
  -3  -5  -1    2.60    0.50
   3   5   2 2018.20  164.68
  -3   5  -2 1498.15  164.48
  -3   5  -2 1963.00  164.48
   3   5   2 1760.02  164.48
   3   5   2 1792.12  164.58
   3  -5   2 1885.21  164.58
  -3  -5  -2 1887.01  164.58
  -3   5  -3    9.00    0.90
   3   5   3    8.40    1.00
  -3   5  -3    6.90    1.00
   3   5   3    7.90    0.90
   3   5   3    8.60    1.20
   3  -5   3    7.80    0.80
   3  -5   3    7.20    1.10
  -3  -5  -3    6.80    1.00
   3  -5   3    8.40    1.10
   3   5   4 1045.50   96.09
  -3   5  -4 1133.79   96.19
  -3  -5  -4 1081.89   96.09
   3  -5   4  993.20   96.19
   3  -5   4 1079.89   95.89
   3   5   5    2.50    0.60
   3   5   5    2.10    0.50
   3   5   5    2.40    0.60
  -3   5  -5    2.60    0.70
  -3  -5  -5    2.30    0.60
   3  -5   5    2.40    0.70
   3   5   6  749.82   65.79
   3   5   6  713.03   65.69
   3   5   6  814.32   65.79
   3  -5   6  597.14   65.79
  -3  -5  -6  768.22   65.69
  -3   5  -7    2.80    0.90
   3   5   7    4.90    0.90
  -3  -5  -7    3.20    0.80
   3  -5   7    4.70    1.00
   3   5   8  180.68   16.70
  -3  -5  -8  183.28   16.50
   3  -5   8  179.08   16.80
  -3   5  -9    1.70    1.00
   3   5   9   -0.10    0.90
  -3  -5  -9    0.90    0.80
   3  -5   9   -0.30    0.90
  -3   5 -10   90.69    9.10
   3   5  10   97.39    9.00
   3  -5  10   89.39    9.00
   3   5  11    6.80    1.70
  -3   5 -11    6.20    1.80
   3  -5  11    6.80    1.80
   3   5  12   17.90    2.80
  -3   5 -12   19.90    2.90
   3  -5  12   16.20    2.70
   3   6 -13    3.30    1.70
  -3   6  13    2.40    2.40
  -3   6  13    2.90    1.70
  -3  -6  13    3.30    1.70
  -3   6  12   15.50    2.30
   3   6 -12   11.90    2.30
  -3   6  12   13.60    2.80
   3  -6 -12   21.40    2.60
  -3  -6  12   15.50    2.50
  -3   6  11    9.30    1.60
   3   6 -11    9.90    1.70
   3  -6 -11    8.90    1.50
  -3  -6  11    7.10    1.60
   3   6 -10  162.98   14.20
  -3   6  10  150.98   14.70
  -3   6  10  158.28   14.50
   3  -6 -10  152.08   14.40
  -3   6   9    2.60    0.80
   3   6  -9    2.10    0.80
   3   6  -9    1.90    0.60
  -3   6   9    0.50    1.00
  -3  -6   9    1.60    0.80
   3  -6  -9    0.60    0.70
   3   6  -8  606.64   51.19
   3   6  -8  467.55   50.99
  -3   6   8  611.34   51.09
  -3  -6   8  579.94   51.29
  -3   6   7    7.80    1.20
   3   6  -7   11.60    1.40
   3   6  -7   11.00    1.30
  -3   6   7    7.20    1.30
   3   6  -7    8.30    1.10
  -3  -6   7   10.00    1.50
   3  -6  -7    8.20    1.20
   3   6  -6  602.44   55.59
   3   6  -6  672.93   55.69
  -3   6   6  663.33   55.59
  -3   6   6  591.64   55.69
   3  -6  -6  553.54   55.59
   3   6  -5    6.50    1.00
   3   6  -5    6.30    0.90
  -3   6   5    8.10    1.20
   3   6  -5    7.50    1.00
  -3   6   5    7.70    1.10
  -3   6   5    7.30    0.90
   3  -6  -5    7.40    1.00
   3  -6  -5    7.60    1.00
  -3  -6   5    6.40    1.00
  -3  -6   5    6.50    1.10
  -3   6   4 1002.90   95.29
   3   6  -4 1001.40   95.29
   3   6  -4 1014.20   95.29
  -3  -6   4 1014.00   95.29
   3  -6  -4 1260.57   95.39
  -3   6   3   13.80    1.30
   3   6  -3   11.30    1.50
   3   6  -3   12.30    1.40
  -3   6   3   15.20    1.50
  -3   6   3   15.50    1.50
  -3  -6   3   13.10    1.50
   3  -6  -3   10.80    1.40
  -3  -6   3   14.60    1.40
   3  -6  -3   10.50    1.50
  -3   6   2 2036.20  180.28
   3   6  -2 2142.39  180.18
  -3   6   2 2074.69  180.38
  -3  -6   2 1690.23  180.18
  -3  -6   2 1980.80  180.28
  -3  -6   2 1989.80  180.18
   3  -6  -2 2110.09  180.18
  -3   6   1  244.18   21.30
  -3   6   1  201.48   21.30
   3   6  -1  269.47   21.20
   3  -6  -1  261.17   21.30
   3  -6  -1  206.88   21.20
  -3  -6   1  227.08   21.30
   3  -6  -1  204.18   21.30
  -3  -6   1  266.07   21.30
   3   6   0  989.90  101.59
   3   6   0 1293.47  101.69
  -3   6   0 1108.99  101.59
  -3  -6   0 1129.39  101.69
   3  -6   0 1169.78  101.59
   3  -6   0 1068.39  101.59
  -3  -6   0 1313.67  101.69
  -3  -6   0 1054.19  101.59
   3  -6   0 1033.50  101.69
  -3   6  -1    5.30    0.70
   3   6   1    4.20    0.70
  -3   6  -1    5.30    0.80
   3   6   1    3.30    0.70
   3   6   1    4.70    0.60
  -3  -6  -1    5.10    0.60
   3  -6   1    5.90    0.80
   3  -6   1    5.10    0.60
  -3  -6  -1    5.00    0.70
   3   6   2  204.68   19.70
   3   6   2  207.88   19.60
   3   6   2  218.18   19.50
  -3   6  -2  227.38   19.60
   3   6   2  200.58   19.50
   3  -6   2  234.58   19.70
   3  -6   2  217.88   19.60
  -3  -6  -2  224.78   19.60
   3  -6   2  210.68   19.50
   3   6   3   17.20    2.10
  -3   6  -3   20.90    2.10
  -3   6  -3   17.20    2.00
   3   6   3   20.80    2.20
   3   6   3   23.80    2.00
   3   6   3   19.30    2.00
  -3  -6  -3   24.20    2.20
   3  -6   3   22.30    2.20
   3  -6   3   21.30    2.00
   3   6   4    3.20    0.80
  -3   6  -4    4.40    0.70
   3   6   4    2.20    0.50
   3   6   4    1.80    0.50
   3  -6   4    2.20    0.70
   3  -6   4    1.70    0.30
  -3  -6  -4    1.90    0.60
  -3   6  -5   48.70    4.40
   3   6   5   40.60    4.30
   3   6   5   53.79    4.30
  -3  -6  -5   38.20    4.30
   3  -6   5   43.80    4.40
   3   6   6    6.40    1.10
  -3   6  -6    3.10    0.80
   3   6   6    8.20    1.20
  -3  -6  -6    5.40    0.90
   3  -6   6    5.30    1.00
   3   6   7    1.60    0.70
  -3   6  -7    0.80    0.70
   3  -6   7    2.20    0.90
  -3  -6  -7    1.00    0.70
   3   6   8  132.09   11.00
  -3   6  -8  108.79   11.00
   3  -6   8  108.19   11.10
  -3  -6  -8  119.19   10.90
  -3   6  -9    0.40    1.00
   3   6   9    1.20    1.00
   3  -6   9    0.40    1.00
  -3  -6  -9    1.10    0.90
  -3   6 -10  120.69   11.00
   3   6  10  107.09   10.80
   3  -6  10  100.89   10.90
  -3  -6 -10  128.29   10.70
   3   6  11    9.30    1.90
  -3   6 -11    6.70    2.00
   3  -6  11    8.00    1.80
   3   6  12  123.29   12.60
  -3   6 -12  138.89   12.90
   3  -6  12  132.59   12.80
  -3   7  13    2.50    2.30
   3   7 -13   -2.90    1.70
   3  -7 -13   -0.20    1.60
  -3  -7  13   -2.00    1.70
  -3   7  12   76.49    8.10
   3   7 -12   69.99    7.60
  -3   7  12   74.69    7.50
   3  -7 -12   78.29    7.60
  -3  -7  12   83.39    7.80
  -3   7  11    0.80    1.10
  -3   7  11    2.80    1.60
  -3  -7  11    2.40    1.30
   3  -7 -11    0.20    1.10
  -3   7  10   52.39    5.20
   3   7 -10   60.89    5.00
   3   7 -10   58.69    5.30
  -3   7  10   47.30    5.60
  -3  -7  10   44.70    5.40
   3  -7 -10   47.00    5.20
  -3   7   9   -0.40    0.60
   3   7  -9   -0.10    0.50
  -3   7   9   -0.50    0.90
   3   7  -9    0.40    0.80
  -3  -7   9    0.40    0.90
   3  -7  -9    0.40    0.70
  -3   7   8    6.30    1.30
  -3   7   8   11.20    1.40
   3   7  -8   12.70    1.70
   3   7  -8    9.10    1.30
   3   7  -8   11.10    1.50
   3  -7  -8    7.50    1.20
  -3  -7   8    7.20    1.40
  -3   7   7    3.10    0.60
   3   7  -7    2.10    0.60
   3   7  -7    3.10    0.80
   3   7  -7    1.30    0.50
  -3   7   7    1.40    0.80
   3  -7  -7    1.10    0.60
  -3  -7   7    2.20    0.80
   3  -7  -7    1.70    0.80
   3   7  -6    3.20    0.60
   3   7  -6    3.00    0.60
   3   7  -6    3.10    0.80
  -3   7   6    4.00    0.90
   3  -7  -6    2.50    0.70
  -3  -7   6    2.00    0.70
   3  -7  -6    3.10    0.80
  -3   7   5   93.29   10.00
   3   7  -5  108.39    9.90
   3   7  -5  124.29   10.00
  -3   7   5  116.69    9.90
   3  -7  -5  122.19   10.00
   3  -7  -5   99.99    9.90
  -3  -7   5   90.99   10.00
   3   7  -4   15.20    1.60
   3   7  -4   16.80    1.80
  -3   7   4   14.50    1.60
  -3   7   4   16.70    1.80
   3  -7  -4   17.00    1.70
  -3  -7   4   19.80    1.90
  -3  -7   4   12.60    1.70
   3   7  -3   13.10    1.30
  -3   7   3   13.70    1.40
   3   7  -3   14.30    1.40
  -3   7   3   11.70    1.20
   3   7  -3    9.90    1.30
  -3  -7   3    7.90    1.40
  -3  -7   3   11.50    1.30
   3  -7  -3    9.60    1.20
   3  -7  -3   12.90    1.30
   3  -7  -3    7.90    1.40
  -3   7   2 1076.89   92.69
  -3   7   2 1076.59   92.69
   3   7  -2 1088.79   92.69
   3   7  -2 1072.29   92.69
   3   7  -2  942.01   92.69
  -3   7   2  937.91   92.59
   3  -7  -2 1014.70   92.69
  -3  -7   2 1006.00   92.69
  -3  -7   2 1043.80   92.69
   3  -7  -2 1033.80   92.59
   3   7  -1    0.70    0.30
   3   7  -1    0.30    0.40
  -3   7   1    0.20    0.30
  -3   7   1    0.70    0.40
   3   7  -1    0.40    0.30
   3  -7  -1    0.30    0.30
  -3  -7   1    0.50    0.30
   3  -7  -1    1.00    0.50
  -3  -7   1    0.50    0.40
   3  -7  -1    0.40    0.30
  -3  -7   1   -0.10    0.50
   3   7   0  247.38   20.30
  -3   7   0  244.98   20.30
   3   7   0  250.27   20.20
   3   7   0  237.78   20.30
  -3  -7   0  239.78   20.20
  -3  -7   0  191.08   20.30
   3  -7   0  234.68   20.30
   3  -7   0  202.88   20.20
   3  -7   0  193.48   20.20
  -3  -7   0  191.68   20.30
   3   7   1   17.40    2.20
  -3   7  -1   25.40    2.30
  -3   7  -1   19.00    2.20
  -3  -7  -1   25.60    2.10
   3  -7   1   20.50    2.30
  -3  -7  -1   22.90    2.30
   3  -7   1   24.20    2.30
   3  -7   1   22.40    2.20
   3   7   2  601.24   60.69
   3   7   2  725.43   60.69
  -3   7  -2  667.53   60.69
   3   7   2  748.03   60.89
   3  -7   2  609.74   60.79
   3  -7   2  762.32   60.89
  -3  -7  -2  606.74   60.79
  -3   7  -3    8.90    1.20
   3   7   3    8.90    1.40
  -3   7  -3    9.20    1.30
   3   7   3   11.70    1.20
   3   7   3   11.00    1.10
   3  -7   3   11.60    1.10
   3  -7   3   10.60    1.40
  -3  -7  -3   11.80    1.40
   3   7   4 1116.29   92.29
  -3   7  -4 1019.00   92.19
  -3   7  -4  951.00   91.99
   3   7   4  873.31   92.09
   3  -7   4 1003.40   92.19
  -3  -7  -4 1179.68   92.19
   3   7   5    3.40    1.00
   3   7   5    3.00    0.70
  -3   7  -5    2.50    0.40
  -3   7  -5    3.20    0.80
   3  -7   5    3.40    0.80
  -3  -7  -5    3.40    0.80
   3  -7   5    4.20    0.50
  -3   7  -6  331.07   31.90
   3   7   6  374.86   31.80
   3  -7   6  363.66   32.00
  -3  -7  -6  332.57   31.80
   3   7   7   11.90    1.90
  -3   7  -7   12.10    1.90
   3   7   7   13.60    1.70
  -3  -7  -7   10.00    1.60
   3  -7   7   15.00    2.00
   3  -7   8  159.88   15.70
  -3  -7  -8  174.58   15.40
  -3   7  -9    5.80    1.50
   3   7   9    8.60    1.50
   3   7   9    6.70    2.00
  -3  -7  -9    9.30    1.50
   3  -7   9    8.30    1.70
   3   7  10   45.60    6.10
   3   7  10   51.49    5.40
  -3   7 -10   53.29    5.60
  -3  -7 -10   62.49    5.40
   3  -7  10   46.20    5.60
  -3   7 -11   -0.30    1.40
   3   7  11    0.20    1.60
   3   7  11   -0.80    2.10
   3  -7  11   -1.00    1.50
  -3   8  13   11.50    3.10
   3   8 -13    8.10    2.30
  -3  -8  13   12.40    2.50
   3  -8 -13   10.90    2.20
   3   8 -12   24.50    3.60
  -3   8  12   18.60    3.50
   3  -8 -12   31.70    3.60
  -3  -8  12   24.20    3.70
   3   8 -11   10.10    1.90
  -3   8  11   12.10    1.80
  -3   8  11    9.50    2.30
  -3  -8  11    8.60    2.00
   3  -8 -11   19.20    2.50
  -3   8  10   52.39    6.00
  -3   8  10   57.59    5.50
   3   8 -10   56.29    5.30
   3  -8 -10   57.99    5.70
  -3  -8  10   56.19    5.90
  -3   8   9   77.59    6.80
   3   8  -9   60.59    6.20
  -3   8   9   58.59    6.30
   3   8  -9   78.89    6.50
   3  -8  -9   70.89    6.50
  -3  -8   9   60.09    6.60
   3   8  -8  202.38   18.50
  -3   8   8  197.48   18.80
   3  -8  -8  203.68   18.70
  -3  -8   8  210.88   18.80
  -3   8   7   19.60    2.10
   3   8  -7   18.90    2.20
   3   8  -7   24.70    2.20
  -3   8   7   19.00    2.50
   3  -8  -7   21.60    2.40
   3  -8  -7   19.80    2.30
  -3  -8   7   18.20    2.40
   3   8  -6  565.34   49.90
  -3   8   6  480.05   49.80
  -3   8   6  477.95   49.99
   3   8  -6  630.04   49.90
  -3  -8   6  566.04   50.09
   3  -8  -6  534.65   49.90
   3  -8  -6  617.04   49.99
   3   8  -5   12.40    1.40
  -3   8   5   10.70    1.20
  -3   8   5   10.50    1.50
   3  -8  -5    9.90    1.30
   3  -8  -5    9.20    1.30
  -3  -8   5   10.00    1.50
   3   8  -4  753.22   68.89
  -3   8   4  813.62   68.79
  -3   8   4  901.01   69.09
   3   8  -4  662.83   68.89
   3  -8  -4  781.92   68.99
   3  -8  -4  689.13   68.79
  -3  -8   4  752.32   68.89
   3   8  -3    2.90    0.60
  -3   8   3    2.60    0.40
   3   8  -3    2.40    0.60
  -3   8   3    1.90    0.60
   3  -8  -3    2.00    0.40
  -3  -8   3    2.00    0.60
  -3  -8   3    3.20    0.60
   3  -8  -3    1.80    0.50
  -3  -8   3    2.10    0.80
   3   8  -2  755.22   70.09
  -3   8   2  812.82   70.19
   3   8  -2  783.32   70.09
  -3  -8   2  829.12   70.19
  -3  -8   2  776.42   70.09
   3  -8  -2  754.52   70.09
  -3  -8   2  733.73   70.09
   3   8  -1    1.40    0.40
  -3   8   1    1.00    0.50
   3   8  -1    1.00    0.40
   3  -8  -1    1.60    0.40
  -3  -8   1    1.30    0.40
  -3  -8   1    1.70    0.40
  -3  -8   1    2.40    0.70
   3  -8  -1    1.80    0.40
   3  -8  -1    1.20    0.40
  -3   8   0  402.76   32.40
   3   8   0  370.46   32.40
   3   8   0  321.57   32.20
  -3   8   0  323.37   32.40
   3  -8   0  379.16   32.30
   3  -8   0  362.86   32.30
   3  -8   0  320.97   32.30
  -3  -8   0  383.16   32.30
  -3   8  -1  105.59    9.40
   3   8   1  109.59    9.30
   3  -8   1   98.69    9.40
  -3  -8  -1  109.09    9.50
   3  -8   1   86.59    9.40
   3  -8   1  104.09    9.40
   3   8   2  226.78   23.60
   3   8   2  252.27   23.40
   3   8   2  282.37   23.40
  -3   8  -2  283.57   23.60
   3  -8   2  260.77   23.40
   3  -8   2  218.18   23.50
  -3  -8  -2  290.37   23.60
   3   8   3   28.20    2.50
  -3   8  -3   22.00    2.70
   3   8   3   24.10    2.80
   3   8   3   29.80    2.50
  -3   8  -3   22.60    2.60
  -3  -8  -3   25.60    2.70
   3  -8   3   28.80    2.70
   3   8   4    3.80    0.60
  -3   8  -4    3.50    0.60
   3   8   4    1.70    0.70
   3   8   4    4.80    0.60
  -3   8  -4    3.50    0.80
   3  -8   4    3.70    0.50
   3  -8   4    3.80    0.80
  -3  -8  -4    3.30    0.80
  -3   8  -5  124.09   11.10
  -3   8  -5  115.89   10.80
   3   8   5  113.99   10.90
   3   8   5  139.09   11.30
   3   8   5  115.59   10.90
   3  -8   5  136.49   10.80
  -3  -8  -5  106.79   11.00
   3  -8   5  103.19   11.10
   3   8   6    2.10    0.90
   3   8   6    3.50    0.70
  -3   8  -6    1.40    0.80
   3   8   6    1.70    0.90
   3  -8   6    2.30    0.90
  -3  -8  -6    1.70    0.80
   3   8   7   59.29    6.50
  -3   8  -7   67.99    6.40
   3   8   7   64.19    6.20
  -3  -8  -7   59.19    6.30
   3  -8   7   73.49    6.50
  -3   8  -8   61.49    5.80
   3   8   8   53.39    5.40
   3   8   8   59.59    6.00
  -3  -8  -8   50.29    5.50
   3  -8   8   56.19    5.70
  -3   8  -9    7.40    1.60
   3   8   9    9.40    1.60
   3   8   9    8.20    2.00
   3  -8   9    7.20    1.80
  -3  -8  -9    9.20    1.60
  -3   8 -10  153.98   14.50
   3   8  10  169.38   15.00
   3  -8  10  140.39   14.50
  -3   8 -11    1.10    1.70
   3   8  11    3.50    2.40
   3  -8  11    3.10    1.80
  -3   9  12   57.59    7.30
   3   9 -12   61.09    6.60
   3  -9 -12   62.59    6.60
  -3  -9  12   65.89    6.80
  -3   9  11   -1.80    1.70
   3   9 -11    0.10    1.20
   3  -9 -11    0.90    1.30
  -3  -9  11   -0.70    1.30
  -3   9  10   60.69    6.90
   3  -9 -10   72.29    6.60
  -3  -9  10   62.99    6.70
   3   9  -9    1.30    0.80
  -3   9   9    1.30    1.20
  -3   9   9    2.00    0.90
   3   9  -9    3.20    1.00
   3  -9  -9    2.90    1.10
  -3  -9   9    2.10    1.20
   3   9  -8   84.49    8.10
  -3   9   8   91.19    8.10
  -3   9   8   86.99    8.40
  -3  -9   8   81.89    8.40
   3  -9  -8   88.49    8.30
   3   9  -7   35.50    3.20
   3   9  -7   27.40    3.10
  -3   9   7   28.80    3.40
   3  -9  -7   31.70    3.30
  -3  -9   7   32.50    3.40
   3  -9  -7   30.30    3.30
   3   9  -6   65.09    5.20
  -3   9   6   46.40    5.30
  -3  -9   6   46.60    5.20
   3  -9  -6   55.09    5.20
   3  -9  -6   54.29    5.10
  -3   9   5    8.30    1.20
  -3   9   5    6.70    0.80
   3   9  -5    8.40    1.20
   3  -9  -5    6.30    1.00
  -3  -9   5    6.00    1.10
   3  -9  -5    6.90    1.10
  -3   9   4   92.59    8.20
   3   9  -4   92.89    8.40
   3   9  -4   82.29    8.40
  -3  -9   4   89.99    8.40
   3  -9  -4   92.79    8.40
  -3  -9   4   99.19    8.50
   3  -9  -4   82.99    8.20
   3   9  -3   48.40    4.40
  -3   9   3   37.70    4.40
   3  -9  -3   43.60    4.20
  -3  -9   3   50.39    4.40
   3  -9  -3   47.10    4.40
  -3  -9   3   47.10    4.40
  -3   9   2  306.67   25.90
   3   9  -2  286.87   25.80
   3  -9  -2  296.57   25.70
  -3  -9   2  289.77   25.90
   3  -9  -2  232.88   25.80
  -3  -9   2  296.17   25.80
   3   9  -1   29.70    2.70
   3   9  -1   28.60    2.50
  -3   9   1   29.20    2.70
  -3  -9   1   23.90    2.70
  -3  -9   1   22.80    2.50
   3  -9  -1   21.90    2.50
   3  -9  -1   26.60    2.60
   3  -9  -1   27.80    2.50
   3   9   0  576.94   49.80
  -3   9   0  600.64   49.80
   3  -9   0  478.65   49.70
  -3  -9   0  570.84   49.80
   3  -9   0  511.35   49.70
  -3  -9   0  569.44   49.60
   3   9   1    3.40    0.80
  -3   9  -1    1.70    0.60
  -3  -9  -1    2.70    0.70
   3  -9   1    2.30    0.50
   3  -9   1    2.50    0.70
   3  -9   1    3.50    0.70
  -3   9  -2  724.13   62.59
   3  -9   2  674.43   62.59
   3  -9   2  686.03   62.69
  -3   9  -3   31.20    3.40
   3   9   3   36.80    3.70
  -3   9  -3   39.40    3.60
   3  -9   3   34.40    3.40
   3  -9   3   32.00    3.50
  -3  -9  -3   41.10    3.60
  -3   9  -4  643.84   55.99
   3   9   4  625.04   55.89
   3   9   4  724.23   56.29
   3  -9   4  551.74   56.09
  -3  -9  -4  561.74   56.09
  -3   9  -5    7.10    1.30
   3   9   5   13.30    1.30
   3   9   5   10.80    1.30
  -3   9  -5   12.70    1.30
   3   9   5    9.70    1.60
   3  -9   5    9.60    1.20
   3  -9   5   10.80    1.70
  -3  -9  -5    9.90    1.50
  -3   9  -6  486.05   44.00
  -3  -9  -6  444.36   44.00
   3  -9   6  525.15   44.10
   3   9   7   17.70    2.10
  -3  -9  -7   18.10    2.40
   3  -9   7   15.70    2.40
   3   9   8  133.69   12.60
  -3   9  -8  134.89   12.40
   3  -9   8  128.49   12.40
  -3  -9  -8  127.89   12.30
  -3   9  -9    3.70    1.40
   3   9   9    6.10    1.90
  -3  -9  -9    3.60    1.40
   3  -9   9    3.60    1.50
  -3   9 -10   27.00    3.60
   3   9  10   22.40    3.60
   3  -9  10   27.90    3.70
  -3  -9 -10   22.80    3.50
   3   9  11   18.80    3.60
  -3   9 -11   15.80    2.60
   3  -9  11   12.80    2.60
  -3  10  12   13.10    3.20
  -3 -10  12   17.10    2.80
   3 -10 -12   16.60    2.70
   3  10 -11   13.20    2.30
  -3  10  11   15.60    2.90
   3 -10 -11   14.90    2.40
  -3 -10  11   12.80    2.40
  -3  10  10   47.80    5.80
   3  10 -10   59.09    5.40
  -3 -10  10   46.90    5.50
   3 -10 -10   50.59    5.50
   3  10  -9   29.60    2.90
   3  10  -9   20.60    2.60
  -3  10   9   21.60    3.20
   3 -10  -9   25.30    3.00
  -3 -10   9   18.00    3.00
  -3  10   8   98.89    9.50
   3  10  -8   94.69    9.20
  -3 -10   8   96.59    9.50
   3 -10  -8  104.79    9.40
  -3  10   7    1.30    0.50
   3  10  -7    2.70    0.80
  -3  10   7    0.50    0.90
   3  10  -7    2.70    0.80
   3 -10  -7    1.30    0.80
  -3 -10   7    0.60    0.90
   3  10  -6  332.77   31.10
  -3  10   6  343.97   30.90
  -3  10   6  331.67   31.20
  -3 -10   6  363.26   31.30
  -3  10   5    0.90    0.70
   3  10  -5    1.00    0.50
  -3  10   5    0.40    0.30
   3 -10  -5    0.10    0.60
  -3 -10   5   -0.10    0.60
   3  10  -4  631.74   55.09
  -3 -10   4  665.43   55.19
   3 -10  -4  564.24   55.09
  -3 -10   4  579.54   55.09
   3  10  -3   29.30    3.50
  -3  10   3   44.70    3.70
   3  10  -3   39.40    3.50
   3 -10  -3   35.30    3.30
  -3 -10   3   42.40    3.60
   3 -10  -3   32.20    3.50
   3 -10  -3   31.30    3.30
  -3  10   2  268.67   22.30
   3  10  -2  256.07   22.20
   3  10  -2  233.48   22.10
   3 -10  -2  221.98   22.00
  -3 -10   2  224.38   22.20
   3 -10  -2  222.18   22.00
   3 -10  -2  283.17   22.20
   3  10  -1    8.50    1.30
  -3  10   1   10.00    1.30
   3  10  -1    6.50    1.10
   3 -10  -1    8.50    1.00
  -3 -10   1    6.60    1.10
   3 -10  -1   11.50    1.20
   3 -10  -1    7.50    1.00
  -3 -10   1    9.70    1.00
   3  10   0  257.07   23.90
   3  10   0  253.57   24.10
  -3  10   0  278.07   24.10
  -3 -10   0  238.78   23.80
   3 -10   0  301.87   24.00
   3 -10   0  260.97   24.00
   3  10   1   26.30    2.80
  -3  10  -1   27.50    2.80
   3 -10   1   29.50    2.70
   3 -10   1   26.90    2.70
  -3 -10  -1   28.20    2.90
   3 -10   1   21.30    2.80
  -3  10  -2   10.80    1.60
   3  10   2   12.40    1.60
   3 -10   2   14.00    1.40
  -3 -10  -2   10.80    1.60
  -3  10  -3   44.40    4.20
  -3  10  -3   47.80    4.10
   3  10   3   39.10    4.20
  -3 -10  -3   40.80    4.20
   3 -10   3   43.50    4.00
   3 -10   3   35.10    4.10
  -3  10  -4   14.10    1.60
   3  10   4    9.70    1.60
  -3  10  -4   11.40    1.60
  -3 -10  -4    7.60    1.40
   3 -10   4   13.00    1.70
   3 -10   4    9.80    1.30
   3  10   5    4.70    1.10
  -3  10  -5    3.90    1.00
   3 -10   5    2.80    0.90
  -3 -10  -5    1.80    0.90
  -3  10  -6   17.40    2.30
   3  10   6   21.60    2.70
   3  10   6   16.80    1.90
   3 -10   6   17.70    2.50
  -3 -10  -6   17.20    2.40
  -3  10  -7    4.90    1.30
   3  10   7    6.70    1.50
   3 -10   7    6.40    1.50
  -3 -10  -7    5.40    1.40
  -3  10  -8   62.39    6.80
   3  10   8   59.39    7.10
   3 -10   8   80.99    6.90
  -3  10  -9   10.30    2.10
   3  10   9   11.00    2.40
  -3 -10  -9   12.10    2.00
   3 -10   9    8.80    2.00
   3  10  10   16.80    3.10
  -3  10 -10   13.00    2.50
  -3 -10 -10   14.20    2.50
   3 -10  10   22.00    3.30
   3  11 -11    1.30    1.70
  -3  11  11    0.30    2.00
  -3 -11  11   -1.10    1.60
   3 -11 -11    1.00    1.70
   3  11 -10   33.90    4.00
  -3  11  10   35.00    4.70
   3 -11 -10   37.40    4.30
  -3 -11  10   32.80    4.40
   3  11  -9    9.50    1.50
   3  11  -9    9.80    1.70
  -3  11   9    6.30    1.80
   3 -11  -9   11.40    1.80
  -3 -11   9    8.60    1.90
   3  11  -8   21.80    2.60
   3  11  -8   23.40    2.60
  -3 -11   8   18.50    2.90
   3 -11  -8   22.60    2.90
  -3  11   7    3.50    1.20
   3  11  -7    0.80    0.80
   3  11  -7    2.30    0.90
  -3 -11   7    2.00    1.00
   3 -11  -7    3.40    1.00
  -3  11   6    0.60    0.90
   3  11  -6    1.10    0.70
  -3 -11   6    1.50    0.90
   3 -11  -6    0.40    0.70
  -3  11   5   50.99    5.40
  -3 -11   5   54.99    5.30
   3 -11  -5   55.99    5.30
  -3  11   4   13.70    2.00
   3  11  -4   18.30    1.90
   3 -11  -4   18.90    2.00
  -3 -11   4   13.60    1.90
  -3 -11   4   13.60    1.90
  -3  11   3  133.59   11.10
   3  11  -3  120.79   11.00
  -3 -11   3  119.09   11.00
  -3 -11   3  103.09   10.90
   3 -11  -3  119.79   11.00
   3  11  -2   70.49    7.10
  -3  11   2   83.99    7.30
   3  11  -2   88.89    7.20
   3 -11  -2   69.59    7.00
   3 -11  -2   86.49    7.20
  -3 -11   2   61.99    7.20
   3  11  -1   34.30    3.60
   3  11  -1   35.60    3.40
  -3  11   1   32.60    3.60
   3 -11  -1   41.90    3.50
  -3 -11   1   43.90    3.70
  -3 -11   1   34.40    3.30
   3 -11  -1   32.10    3.40
   3 -11  -1   33.30    3.40
   3  11   0  296.97   26.90
  -3  11   0  291.17   26.90
  -3 -11   0  333.47   27.00
   3 -11   0  248.78   26.80
   3 -11   0  313.17   26.90
   3  11   1   87.99    8.50
  -3 -11  -1  104.19    8.50
   3 -11   1   95.29    8.40
   3 -11   1   75.79    8.30
   3  11   2  464.05   44.00
  -3 -11  -2  506.05   44.00
   3  11   3   -0.10    0.80
  -3  11  -3   -0.10    0.70
   3 -11   3    0.80    0.70
   3 -11   3    0.50    0.50
  -3 -11  -3   -1.30    0.70
  -3  11  -4  134.89   11.60
   3 -11   4  107.19   11.50
   3 -11   4  134.49   11.40
  -3 -11  -4  119.29   11.60
   3  11   5   26.20    3.00
  -3  11  -5   20.60    2.70
   3 -11   5   27.70    2.80
   3 -11   5   19.70    2.30
  -3 -11  -5   21.30    2.80
   3  11   6   98.69    9.60
  -3  11  -6  111.29    9.40
  -3 -11  -6   98.89    9.40
   3 -11   6   85.09    9.30
  -3  11  -7    5.60    1.40
   3  11   7    6.30    1.70
   3 -11   7    7.00    1.50
  -3 -11  -7    3.50    1.40
   3  11   8   77.39    8.40
  -3  11  -8   98.99    8.30
  -3 -11  -8   80.69    8.10
   3 -11   8   72.79    8.10
   3  11   9    7.00    2.20
  -3  11  -9    6.50    1.70
   3 -11   9    4.70    1.80
  -3 -11  -9    6.00    1.90
   3  11  10   19.80    3.60
  -3  11 -10   15.80    2.70
   3 -11  10   17.30    2.80
  -3 -11 -10   17.00    2.80
   3  12 -11   28.00    4.60
  -3  12  11   38.70    5.40
   3 -12 -11   42.00    4.90
  -3 -12  11   37.10    4.70
  -3  12  10   67.39    7.40
   3  12 -10   63.99    6.90
  -3 -12  10   72.29    7.10
   3 -12 -10   67.69    7.10
  -3  12   9   16.80    2.60
   3  12  -9   20.60    2.80
  -3 -12   9   14.50    2.50
   3 -12  -9   20.20    2.90
  -3  12   8   50.39    5.40
   3  12  -8   50.29    5.00
   3  12  -8   47.50    4.90
   3 -12  -8   49.70    5.20
   3  12  -7   32.40    3.50
   3  12  -7   32.30    3.40
   3 -12  -7   34.40    3.70
  -3 -12   7   31.50    3.70
  -3  12   6  146.29   13.90
  -3 -12   6  152.18   13.90
  -3  12   5    7.60    1.40
   3  12  -5    8.60    1.30
  -3 -12   5    9.30    1.50
   3 -12  -5    7.80    1.30
   3  12  -4  414.06   34.10
  -3 -12   4  341.47   34.10
  -3 -12   4  372.96   34.10
   3  12  -3    0.10    0.60
   3  12  -3   -0.20    0.90
  -3  12   3    0.20    0.80
   3 -12  -3    0.80    0.60
  -3 -12   3   -0.20    0.60
  -3 -12   3    0.20    0.70
   3  12  -2  365.36   31.50
   3  12  -2  340.07   31.70
  -3 -12   2  347.57   31.70
   3 -12  -2  340.47   31.60
   3  12  -1    7.00    1.10
   3  12  -1    5.00    0.70
  -3  12   1    3.40    1.00
  -3 -12   1    4.00    1.00
   3 -12  -1    4.40    0.70
  -3 -12   1    4.50    0.70
   3 -12  -1    5.30    0.80
   3 -12  -1    5.30    0.90
   3  12   0  120.39   11.00
  -3  12   0  123.79   11.00
   3 -12   0  107.29   10.80
   3 -12   0  119.59   10.80
  -3  12  -1   83.99    8.40
   3  12   1   94.09    8.50
   3 -12   1   81.79    8.30
  -3 -12  -1   94.59    8.50
   3 -12   1   91.99    8.30
   3  12   2  112.79   10.20
  -3  12  -2   99.49   10.10
   3 -12   2  116.39   10.10
   3 -12   2  107.29   10.00
  -3 -12  -2  105.79   10.20
   3  12   3   29.30    3.30
  -3  12  -3   26.30    3.10
   3 -12   3   28.60    2.90
  -3 -12  -3   23.60    3.10
   3 -12   3   34.70    3.20
  -3  12  -4   16.30    2.10
   3  12   4   20.80    2.40
  -3 -12  -4   14.80    2.20
   3 -12   4   13.80    2.20
   3 -12   4   13.80    1.80
  -3  12  -5   34.40    3.70
   3  12   5   36.60    3.90
   3 -12   5   32.30    3.40
   3 -12   5   33.90    3.80
   3  12   6   34.50    4.10
  -3  12  -6   35.10    3.90
   3 -12   6   35.40    4.00
  -3 -12  -6   34.30    4.00
  -3  12  -7    9.30    1.70
   3  12   7   10.50    2.10
  -3 -12  -7    9.10    1.90
   3 -12   7   10.20    1.90
   3  12   8   14.80    2.70
  -3  12  -8   11.50    2.00
  -3 -12  -8   11.40    2.10
   3 -12   8   10.60    2.10
   3  12   9    7.50    2.50
  -3  12  -9    4.20    1.80
   3 -12   9    7.70    1.90
  -3 -12  -9    8.60    2.10
  -3  13  10   66.99    7.10
  -3 -13  10   60.49    6.80
   3 -13 -10   62.49    6.80
   3  13  -9    5.00    1.40
  -3  13   9    2.20    1.70
   3 -13  -9    2.40    1.50
  -3 -13   9    0.20    1.50
   3  13  -8    6.70    1.40
  -3  13   8    5.60    1.70
   3  13  -8    6.90    1.40
   3 -13  -8    8.00    1.70
  -3 -13   8    9.70    1.90
   3  13  -7   44.30    4.00
   3  13  -7   32.90    3.90
  -3  13   7   30.60    4.10
   3 -13  -7   37.10    4.20
  -3 -13   7   39.30    4.20
  -3  13   6   -0.20    1.00
  -3 -13   6    0.50    1.10
   3 -13  -6   -0.10    0.90
   3  13  -5   31.30    3.20
  -3  13   5   24.90    3.40
   3 -13  -5   34.20    3.40
  -3 -13   5   29.00    3.40
  -3  13   4    2.30    0.90
   3  13  -4    0.90    0.70
   3 -13  -4    2.10    0.90
  -3 -13   4    1.40    0.80
  -3 -13   4    1.30    0.90
  -3  13   3    1.30    0.90
   3  13  -3    2.60    0.80
   3 -13  -3    3.20    0.90
  -3 -13   3    2.50    0.80
  -3 -13   3    2.50    0.90
   3  13  -2   18.10    2.30
  -3  13   2   22.50    2.50
   3 -13  -2   19.50    2.30
  -3 -13   2   19.20    2.40
  -3 -13   2   17.00    2.00
   3  13  -1   63.79    6.00
  -3  13   1   62.59    6.10
  -3 -13   1   66.99    6.00
   3 -13  -1   57.29    5.70
   3 -13  -1   59.49    5.90
  -3  13   0  131.29   13.90
   3  13   0  131.89   13.90
  -3 -13   0  174.48   14.00
   3 -13   0  166.68   13.90
   3  13   1    0.20    0.70
  -3  13  -1    0.00    0.80
   3 -13   1    0.20    0.70
   3 -13   1   -0.20    0.70
  -3 -13  -1    0.50    0.80
  -3  13  -2  207.08   19.90
   3 -13   2  223.98   19.80
  -3 -13  -2  230.28   20.00
   3 -13   2  205.38   19.70
   3 -13   3    0.20    0.70
   3 -13   3    0.50    0.90
  -3  13  -4  111.19   10.90
  -3 -13  -4  115.99   11.00
   3 -13   4  124.39   10.90
   3 -13   4  111.29   10.70
   3  13   5    1.20    1.20
  -3  13  -5    1.20    1.00
   3 -13   5    0.90    1.20
   3 -13   5    1.90    0.80
  -3 -13  -5    2.20    1.10
   3  13   6   66.49    7.40
  -3  13  -6   87.29    7.40
  -3 -13  -6   65.79    7.30
   3  13   7    9.20    2.10
  -3  13  -7    8.90    1.70
   3 -13   7    5.80    1.80
  -3 -13  -7    5.90    1.80
  -3  13  -8   61.29    7.10
   3  13   8   63.59    7.40
   3 -13   8   68.29    7.10
  -3 -13  -8   83.79    7.30
  -3  14   9    6.70    2.20
   3  14  -9    8.90    2.00
   3 -14  -9   12.40    2.30
  -3 -14   9    9.50    2.20
   3  14  -8   69.49    6.30
  -3  14   8   61.79    6.60
   3  14  -8   53.09    6.20
  -3 -14   8   62.89    6.60
   3 -14  -8   65.79    6.60
  -3  14   7   29.70    3.80
   3  14  -7   31.10    3.50
   3 -14  -7   31.40    3.70
  -3 -14   7   29.90    3.90
  -3  14   6   62.99    6.70
  -3 -14   6   68.89    6.70
   3 -14  -6   68.19    6.70
   3  14  -5    4.80    1.20
  -3  14   5    5.30    1.30
  -3 -14   5    6.80    1.40
   3 -14  -5    7.30    1.50
  -3  14   4   81.19    7.80
   3 -14  -4   75.39    7.70
  -3 -14   4   86.79    7.60
  -3 -14   4   75.69    7.60
  -3  14   3   13.10    2.10
   3  14  -3   19.20    2.20
  -3 -14   3   19.90    2.10
  -3 -14   3   14.10    2.10
   3 -14  -3   15.90    2.20
   3  14  -2   37.10    3.60
  -3 -14   2   31.50    3.70
   3 -14  -2   32.00    3.60
   3  14  -1   19.70    2.40
   3 -14  -1   19.00    2.40
  -3 -14   1   20.30    2.60
   3  14   0   82.79    8.00
   3 -14   0   85.19    8.00
  -3  14  -1    4.60    1.20
  -3 -14  -1    3.70    1.10
   3 -14   1    7.70    1.20
   3  14   2    5.20    1.20
  -3  14  -2    2.80    1.20
  -3 -14  -2    5.50    1.20
   3 -14   2    6.50    1.10
   3 -14   2    5.40    1.20
  -3  14  -3   42.70    4.80
   3  14   3   55.99    4.90
   3 -14   3   43.10    4.60
   3 -14   3   47.60    4.80
  -3 -14  -3   42.10    4.90
  -3  14  -4    1.20    0.90
   3  14   4   -0.10    1.10
  -3 -14  -4    0.20    1.10
   3 -14   4    0.40    0.90
   3 -14   4   -0.10    1.10
  -3  14  -5   59.49    6.40
   3  14   5   78.39    6.80
  -3 -14  -5   57.09    6.60
   3 -14   5   63.69    6.50
  -3  14  -6    5.00    1.50
   3  14   6    7.00    1.80
  -3 -14  -6    5.90    1.70
   3 -14   6    8.10    1.80
  -3  14  -7   14.20    2.40
   3  14   7   16.40    2.70
   3 -14   7   14.90    2.50
  -3 -14  -7   19.80    2.70
  -3  14  -8   35.40    4.90
   3  14   8   34.40    5.40
  -3 -14  -8   46.40    5.40
   3 -14   8   41.10    4.90
  -3  15   8   10.80    2.20
   3  15  -8    7.30    1.80
  -3 -15   8   11.60    2.40
   3 -15  -8   11.30    2.20
   3  15  -7    5.20    1.40
  -3  15   7    5.50    1.70
   3 -15  -7    4.70    1.60
   3  15  -6    4.10    1.20
  -3  15   6    3.80    1.40
   3 -15  -6    2.90    1.30
  -3 -15   6    6.10    1.70
   3  15  -5   44.30    4.40
  -3  15   5   32.10    4.50
   3 -15  -5   44.90    4.50
   3  15  -4    4.60    1.20
  -3  15   4    6.00    1.40
  -3 -15   4    3.80    1.20
   3 -15  -4    3.90    1.20
  -3  15   3   69.29    7.00
   3 -15  -3   73.09    7.00
  -3 -15   3   70.39    6.90
   3  15  -2   78.19    7.60
  -3 -15   2   78.99    7.70
   3 -15  -2   79.49    7.60
  -3  15   1   22.80    3.20
   3  15  -1   24.60    3.10
  -3 -15   1   32.20    3.30
   3 -15  -1   25.60    3.00
  -3  15   0   42.80    4.80
   3  15   0   50.59    4.80
   3  15   1   52.69    5.90
  -3  15  -1   67.59    6.00
  -3 -15  -1   57.69    6.00
  -3  15  -2   91.29    8.60
   3  15   2   83.09    8.60
   3 -15   2   90.89    8.50
  -3 -15  -2   91.39    8.70
  -3  15  -3    1.30    1.20
   3  15   3    3.10    1.30
   3 -15   3    2.60    1.10
  -3 -15  -3    3.10    1.40
   3 -15   3    3.00    1.30
   3  15   4  107.89   11.50
  -3  15  -4  137.19   11.60
  -3 -15  -4  117.29   11.60
   3 -15   4  123.19   11.30
   3  15   5   -0.80    1.30
  -3  15  -5   -1.60    1.10
   3 -15   5    0.60    1.40
  -3 -15  -5    0.60    1.40
   3  15   6   70.89    8.00
  -3  15  -6   73.59    7.70
   3 -15   6   84.19    7.80
   3  15   7    4.60    2.20
  -3  15  -7   -1.60    1.50
  -3 -15  -7   -0.20    1.90
   3 -15   7   -0.20    1.60
  -3  16   7    5.50    1.90
   3  16  -7    3.20    1.50
   3 -16  -7    3.10    1.70
  -3  16   6   66.79    6.60
   3  16  -6   61.19    6.40
   3 -16  -6   60.99    6.60
  -3  16   5    5.40    1.70
   3  16  -5    4.70    1.40
   3 -16  -5    4.80    1.50
   3  16  -4   66.39    6.60
  -3  16   4   67.09    6.70
  -3 -16   4   58.19    6.50
   3 -16  -4   72.39    6.70
   3  16  -3    4.10    1.30
  -3  16   3    3.70    1.40
  -3 -16   3    3.20    1.30
   3 -16  -3    3.00    1.20
   3  16  -2   69.89    6.80
  -3  16   2   66.59    6.80
   3 -16  -2   70.19    6.80
  -3 -16   2   65.49    6.80
  -3  16   1    2.70    1.30
   3  16  -1    2.30    1.20
   3 -16  -1    3.30    1.30
  -3 -16   1    3.10    1.20
  -3  16   0   27.20    3.20
   3  16   0   19.80    3.10
  -3 -16   0   26.40    3.30
   3 -16   0   28.90    3.20
  -3  16  -1    4.40    1.40
   3  16   1    2.70    1.20
  -3 -16  -1    5.50    1.50
   3 -16   1    2.70    1.20
  -3  16  -2   20.00    3.00
   3  16   2   21.80    2.90
  -3 -16  -2   19.80    3.00
   3 -16   2   20.10    2.80
   3  16   3   36.80    4.20
  -3  16  -3   35.30    4.30
  -3 -16  -3   37.60    4.40
   3  16   4    0.50    1.40
  -3  16  -4   -1.40    1.30
  -3 -16  -4    1.60    1.40
   3 -16   4    2.10    1.40
  -3  16  -5    4.30    1.60
   3  16   5    5.50    1.90
  -3 -16  -5   10.20    2.20
  -3  16  -6    1.50    1.70
   3  16   6    1.70    1.80
  -3 -16  -6    1.10    2.00
  -3  17   6    2.60    1.90
   3  17  -6    2.50    1.60
   3 -17  -6    0.20    1.80
   3  17  -5   11.10    2.10
  -3  17   5   19.20    2.60
   3 -17  -5   13.50    2.40
   3  17  -4    3.70    1.50
  -3  17   4    3.50    1.50
  -3 -17   4    3.10    1.50
   3 -17  -4    5.50    1.60
  -3  17   3   38.10    4.70
   3  17  -3   37.40    4.50
  -3 -17   3   43.40    4.60
   3 -17  -3   41.80    4.60
  -3  17   2   31.20    3.80
   3  17  -2   30.70    3.70
  -3 -17   2   29.10    3.90
   3 -17  -2   31.10    3.80
   3  17  -1   34.10    4.10
  -3  17   1   35.80    4.20
  -3 -17   1   37.60    4.30
   3 -17  -1   35.20    4.10
  -3  17   0   38.80    4.50
   3  17   0   40.20    4.40
   3 -17   0   41.50    4.30
  -3 -17   0   33.00    4.50
   3  17   1    3.30    1.40
  -3  17  -1    7.70    1.60
   3 -17   1    5.50    1.50
  -3 -17  -1    9.40    1.80
  -3  17  -2   22.60    3.40
   3  17   2   19.00    3.00
   3 -17   2   27.90    3.40
  -3 -17  -2   28.00    3.60
   3  17   3    4.20    1.50
  -3  17  -3    2.10    1.40
   3 -17   3    6.60    1.70
  -3 -17  -3    3.90    1.70
  -3  17  -4   54.49    5.90
   3  17   4   53.49    6.00
  -3 -17  -4   50.89    6.10
   3  18  -4   49.60    5.80
  -3  18   4   62.89    6.10
   3 -18  -4   63.79    6.10
  -3 -18   4   43.50    5.80
   3  18  -3    1.60    1.40
  -3  18   3    0.40    1.60
   3 -18  -3   -0.60    1.50
  -3 -18   3   -0.60    1.50
   3  18  -2   44.60    5.00
   3 -18  -2   48.50    5.10
  -3 -18   2   42.90    5.20
  -3  18   1    1.30    1.40
   3  18  -1    1.80    1.40
   3 -18  -1    3.10    1.40
  -3 -18   1    1.30    1.50
   3  18   0   24.30    3.50
   3 -18   0   26.10    3.40
  -3 -18   0   21.20    3.10
   3  18   1   35.60    4.70
  -3  18  -1   51.09    5.10
   3 -18   1   33.50    4.80
  -3 -18  -1   47.20    5.10
  -3  18  -2    2.20    1.70
   3  18   2    2.60    1.70
   3 -18   2    1.70    1.70
  -3 -18  -2    5.00    1.80
  -4   0  14   45.20    5.30
  -4   0  13    1.30    1.30
   4   0 -13   -0.10    1.40
  -4   0  12  229.08   18.50
   4   0 -12  189.28   18.40
   4   0 -12  180.88   18.10
   4   0 -11   -0.20    0.70
   4   0 -11    0.30    0.90
  -4   0  11   -0.10    0.90
   4   0 -10  175.28   15.50
   4   0 -10  163.08   15.60
  -4   0   9    0.20    0.60
   4   0  -9    0.70    0.50
   4   0  -9   -0.40    0.60
  -4   0   8  296.57   30.40
  -4   0   8  340.57   30.30
   4   0  -8  374.06   30.30
   4   0  -8  327.97   30.30
  -4   0   7    0.10    0.50
   4   0  -7   -0.50    0.40
   4   0  -7    0.60    0.40
  -4   0   7   -0.10    0.30
  -4   0   7    0.20    0.40
   4   0  -6  127.59   12.00
   4   0  -6  141.19   12.10
  -4   0   6  130.09   12.10
   4   0  -6  127.09   11.90
   4   0  -5    0.00    0.30
  -4   0   5    0.50    0.40
   4   0  -5    0.10    0.20
  -4   0   5   -0.10    0.20
   4   0  -5   -0.10    0.30
  -4   0   5    0.10    0.30
  -4   0   4    5.60    0.60
   4   0  -4    5.00    0.60
  -4   0   3    0.40    0.30
  -4   0   3    0.00    0.30
   4   0  -3    0.10    0.20
   4   0  -3   -0.10    0.20
   4   0  -2  594.34   61.69
   4   0  -2  750.42   61.69
  -4   0   2  630.04   61.69
  -4   0   2  765.72   61.69
  -4   0   1    0.30    0.20
  -4   0   1    0.10    0.20
   4   0  -1    0.10    0.20
   4   0  -1    0.00    0.20
   4   0  -1    0.30    0.10
  -4   0   1    0.00    0.10
  -4   0   0  749.33   65.09
   4   0   0  729.13   65.09
   4   0   0  690.73   65.09
  -4   0   0  722.13   65.09
  -4   0  -1    0.10    0.20
  -4   0  -1    0.10    0.20
   4   0   1    0.20    0.30
   4   0   1   -0.10    0.20
   4   0   1   -0.10    0.20
   4   0   2 1944.11  156.78
   4   0   2 1540.45  156.68
   4   0   3    0.40    0.20
   4   0   3   -0.30    0.20
  -4   0  -3    0.40    0.40
   4   0   3   -0.10    0.30
   4   0   3    0.40    0.40
   4   0   3    0.00    0.40
   4   0   4 1145.59   93.49
   4   0   4  961.90   93.19
   4   0   4  982.90   93.39
   4   0   4 1056.09   93.49
   4   0   4 1038.80   93.19
  -4   0  -5    0.10    0.50
   4   0   5    0.00    0.20
   4   0   5   -0.10    0.40
   4   0   6 1051.99   89.39
  -4   0  -6 1006.70   89.69
   4   0   6  921.21   89.59
  -4   0  -7   -0.10    0.80
   4   0   7   -0.90    0.50
   4   0   8  412.86   38.60
  -4   0  -8  436.96   38.70
  -4   0  -9    2.10    1.20
   4   0   9   -0.60    0.90
   4   0  10  113.79   11.50
  -4   0 -10  130.39   11.80
  -4   0 -11   -0.30    1.60
   4   0  11   -0.50    1.20
   4   0  12   41.20    5.00
  -4   1  14    9.20    2.10
   4   1 -14    4.20    2.20
  -4  -1  14    8.80    2.00
  -4   1  13   10.60    2.00
   4   1 -13    9.60    2.10
  -4  -1  13   11.40    2.00
  -4   1  12    6.50    1.40
   4   1 -12    3.90    0.90
   4   1 -12    3.80    1.40
  -4  -1  12    2.70    1.20
   4  -1 -12    4.20    1.00
   4  -1 -12    1.90    1.30
  -4   1  11   21.10    2.60
   4   1 -11   19.40    2.60
   4   1 -11   20.80    2.20
  -4  -1  11   24.70    2.70
   4  -1 -11   17.60    2.30
   4  -1 -11   15.30    2.50
   4   1 -10   57.29    6.10
   4   1 -10   65.89    6.00
   4  -1 -10   58.79    6.10
  -4  -1  10   59.79    6.30
   4  -1 -10   76.99    6.10
   4   1  -9   -0.30    0.60
  -4   1   9   -0.20    0.60
   4   1  -9   -0.50    0.40
   4  -1  -9   -0.20    0.60
   4  -1  -9    0.30    0.50
  -4  -1   9    0.70    0.60
   4   1  -8  348.17   30.50
   4   1  -8  338.37   30.60
  -4   1   8  314.37   30.60
  -4   1   8  345.17   30.50
   4  -1  -8  324.77   30.50
  -4  -1   8  356.26   30.50
  -4  -1   8  333.77   30.70
   4  -1  -8  332.77   30.60
  -4  -1   8  341.27   30.50
   4   1  -7   15.50    1.60
   4   1  -7   16.10    1.60
  -4   1   7   16.10    1.80
  -4   1   7   17.40    1.70
   4  -1  -7   13.10    1.60
  -4  -1   7   13.00    1.70
  -4  -1   7   17.00    1.80
   4  -1  -7   16.00    1.70
  -4  -1   7   12.00    1.60
   4   1  -6  716.53   72.79
  -4   1   6  778.72   72.89
   4   1  -6  872.41   72.79
  -4   1   6  670.33   72.69
   4  -1  -6  915.11   72.79
  -4  -1   6  883.71   72.89
   4  -1  -6  883.51   72.79
  -4  -1   6  746.73   72.69
  -4   1   5  117.89   10.60
  -4   1   5   98.49   10.50
   4   1  -5  120.89   10.50
  -4   1   5  123.89   10.50
   4   1  -5  118.49   10.50
  -4  -1   5   97.29   10.50
  -4  -1   5  130.09   10.60
  -4   1   4 1529.15  162.18
   4   1  -4 2009.10  162.28
  -4   1   4 2086.49  162.38
  -4  -1   4 2063.49  162.68
   4  -1  -4 1558.34  162.18
  -4  -1   4 1807.12  162.28
  -4  -1   4 1577.64  162.18
   4   1  -3  135.69   11.80
  -4   1   3  125.99   11.90
   4   1  -3  117.49   11.90
  -4   1   3  151.88   11.80
  -4   1   3  147.49   11.80
   4  -1  -3  115.29   11.90
  -4  -1   3  120.69   11.90
  -4   1   2 2579.24  220.08
   4   1  -2 2415.56  220.48
  -4   1   2 2332.67  220.38
  -4   1   2 1986.40  220.08
   4  -1  -2 2625.64  220.48
  -4  -1   2 2747.12  220.78
   4   1  -1    8.60    1.10
   4   1  -1   11.40    1.00
  -4   1   1   10.60    1.10
   4   1  -1   10.90    1.10
  -4   1   1   10.30    1.10
  -4   1   1    9.90    1.00
   4  -1  -1    8.90    1.10
  -4  -1   1   10.70    1.10
   4  -1  -1   10.10    1.00
  -4   1   0 1519.75  135.69
  -4   1   0 1528.35  135.89
   4   1   0 1491.45  135.69
  -4   1   0 1340.87  135.69
   4  -1   0 1557.34  135.89
  -4  -1   0 1615.14  135.79
   4   1   1   56.89    4.70
   4   1   1   61.09    4.70
   4   1   1   50.39    4.80
   4   1   1   43.20    4.70
  -4   1  -1   60.89    4.70
  -4   1  -1   52.59    4.70
   4  -1   1   51.19    4.80
  -4  -1  -1   45.50    4.70
   4  -1   1   45.50    4.70
  -4  -1  -1   44.50    4.70
   4   1   2  459.25   38.20
   4   1   2  435.36   38.20
   4  -1   2  406.96   38.10
   4  -1   2  375.76   38.20
   4  -1   2  438.56   38.10
   4  -1   2  421.46   38.20
  -4   1  -3    1.20    0.40
   4   1   3    1.20    0.40
   4   1   3    0.50    0.30
   4   1   3    1.00    0.50
   4   1   3    1.20    0.30
   4  -1   3    2.20    0.30
  -4  -1  -3    1.80    0.50
   4  -1   3    1.30    0.40
   4  -1   3    1.50    0.20
   4  -1   3    1.20    0.50
   4  -1   3    1.00    0.40
   4   1   4   40.40    3.90
   4   1   4   40.90    3.60
   4   1   4   40.50    3.80
  -4   1  -4   35.00    3.80
   4  -1   4   40.30    3.80
  -4  -1  -4   32.80    3.80
   4  -1   4   41.90    3.60
   4  -1   4   40.10    3.60
   4   1   5    1.40    0.30
   4   1   5    0.50    0.50
  -4   1  -5    0.40    0.60
  -4  -1  -5    0.90    0.60
   4  -1   5    0.60    0.50
   4   1   6    2.80    0.70
   4   1   6    1.50    0.40
  -4   1  -6    3.10    0.90
  -4  -1  -6    2.00    0.80
   4  -1   6    1.90    0.60
  -4   1  -7    1.00    0.80
   4   1   7    1.40    0.40
   4   1   7    1.10    0.70
  -4  -1  -7    2.90    0.90
   4  -1   7    0.50    0.60
  -4   1  -8   42.40    4.50
   4   1   8   42.10    4.40
   4  -1   8   39.70    4.40
  -4  -1  -8   49.30    4.60
   4   1   9    3.10    1.10
  -4   1  -9    0.90    1.10
  -4  -1  -9    1.20    1.20
   4   1  10  100.39    8.50
  -4   1 -10   87.29    8.60
   4  -1  10   80.89    8.40
  -4  -1 -10   75.69    8.60
   4   1  11    0.10    1.30
  -4   1 -11    1.50    1.70
  -4  -1 -11    1.40    1.70
   4  -1  11   -0.40    1.20
   4   1  12   77.59    7.80
   4  -1  12   74.19    7.80
   4   2 -14   51.09    6.00
  -4   2  14   46.80    5.60
  -4  -2  14   50.59    5.70
   4   2 -13   -1.30    1.60
  -4   2  13    0.20    1.30
  -4  -2  13   -0.90    1.20
   4   2 -12  143.19   13.30
   4   2 -12  136.09   13.00
  -4   2  12  132.99   13.30
   4  -2 -12  135.49   13.10
  -4  -2  12  165.68   13.50
   4   2 -11    1.80    1.00
   4   2 -11    1.10    0.70
  -4   2  11    2.00    1.00
   4  -2 -11    2.10    0.80
   4   2 -10  216.78   18.80
   4   2 -10  202.48   19.00
   4  -2 -10  201.68   18.90
  -4   2   9    0.60    0.60
   4   2  -9    0.80    0.40
   4   2  -9    0.10    0.60
   4  -2  -9    0.40    0.50
  -4  -2   9    0.30    0.70
  -4   2   8  181.68   16.30
   4   2  -8  181.88   16.30
   4   2  -8  166.78   16.20
  -4  -2   8  194.28   16.20
   4  -2  -8  186.18   16.20
  -4  -2   8  156.38   16.40
  -4   2   7    1.20    0.50
   4   2  -7    1.20    0.50
   4   2  -7    1.10    0.50
  -4   2   7    1.60    0.50
   4  -2  -7    1.50    0.40
  -4  -2   7    1.80    0.50
  -4  -2   7    0.70    0.50
  -4  -2   7    1.80    0.50
  -4   2   6  405.86   37.20
   4   2  -6  434.26   37.20
  -4   2   6  343.27   37.10
   4   2  -6  435.56   37.10
  -4  -2   6  431.26   37.30
   4  -2  -6  454.95   37.20
  -4  -2   6  376.26   37.10
  -4   2   5  280.97   27.40
   4   2  -5  311.27   27.40
   4   2  -5  311.47   27.40
   4   2  -5  259.17   27.40
  -4   2   5  301.47   27.40
  -4   2   5  301.27   27.40
  -4  -2   5  323.57   27.40
  -4  -2   5  304.67   27.50
   4  -2  -5  334.37   27.40
   4   2  -4    3.10    0.60
  -4   2   4    4.20    0.60
  -4   2   4    5.40    0.70
   4   2  -4    4.30    0.50
  -4   2   4    4.90    0.60
  -4  -2   4    3.90    0.60
   4  -2  -4    3.80    0.60
   4  -2  -4    5.00    0.70
   4   2  -3   14.20    1.40
  -4   2   3   13.90    1.50
  -4   2   3   15.30    1.40
  -4   2   3   13.00    1.40
   4   2  -3   14.70    1.30
  -4  -2   3   16.00    1.30
   4  -2  -3   11.10    1.40
   4  -2  -3   10.70    1.40
   4   2  -2  252.87   22.00
  -4   2   2  207.48   22.00
  -4   2   2  258.97   21.90
  -4   2   2  262.87   22.00
   4   2  -2  258.47   21.90
   4  -2  -2  252.17   22.00
   4  -2  -2  251.17   21.90
  -4  -2   2  201.88   22.00
  -4   2   1   48.90    4.40
  -4   2   1   42.30    4.40
  -4   2   1   45.80    4.50
   4   2  -1   53.69    4.40
   4   2  -1   45.50    4.50
   4   2  -1   49.80    4.50
   4  -2  -1   40.60    4.40
   4  -2  -1   52.59    4.40
  -4  -2   1   52.89    4.50
  -4   2   0 1458.65  118.59
  -4   2   0 1350.96  118.69
  -4   2   0 1262.97  118.59
   4  -2   0 1387.06  118.89
  -4  -2   0 1207.28  118.59
   4  -2   0 1431.96  118.79
   4  -2   0 1132.89  118.59
   4   2   1   31.10    2.80
  -4   2  -1   29.80    2.80
   4   2   1   24.50    2.80
   4   2   1   34.10    2.80
   4  -2   1   25.80    2.80
  -4  -2  -1   24.20    2.70
  -4  -2  -1   30.40    2.80
   4  -2   1   29.40    2.70
   4  -2   1   31.20    2.80
   4   2   2 1238.68  102.69
   4   2   2 1029.50  102.69
   4   2   2 1131.99  102.79
  -4   2  -2 1325.57  102.69
   4  -2   2 1035.80  102.69
   4  -2   2 1226.08  102.79
   4  -2   2 1001.40  102.79
   4   2   3    2.30    0.50
   4   2   3    1.80    0.40
  -4   2  -3    1.90    0.50
   4   2   3    1.00    0.40
   4   2   3    1.30    0.40
  -4  -2  -3    2.10    0.50
   4  -2   3    1.20    0.50
   4  -2   3    1.10    0.40
  -4  -2  -3    1.60    0.40
   4  -2   3    1.20    0.40
   4  -2   3    1.50    0.20
   4  -2   3    2.20    0.30
   4   2   4 1627.74  147.59
   4   2   4 1811.62  147.59
  -4   2  -4 1547.05  147.59
   4   2   4 1641.54  147.49
  -4  -2  -4 1419.26  147.59
  -4  -2  -4 1788.52  147.49
   4   2   5    3.20    0.50
  -4   2  -5    3.90    0.80
   4   2   5    3.60    0.70
  -4  -2  -5    4.80    0.60
  -4  -2  -5    4.10    0.90
   4  -2   5    3.90    0.80
   4   2   6  789.52   64.39
  -4  -2  -6  598.24   64.19
  -4  -2  -6  821.42   64.49
   4  -2   6  647.24   64.39
  -4   2  -7    2.70    0.90
   4   2   7    2.20    0.70
   4   2   7    1.50    0.40
   4  -2   7    1.50    0.70
  -4  -2  -7    0.90    0.80
   4   2   8  480.85   39.30
  -4   2  -8  365.06   39.20
  -4  -2  -8  417.26   39.30
   4  -2   8  463.35   39.30
   4   2   9    1.20    1.00
  -4   2  -9   -0.10    1.10
   4  -2   9    0.30    0.90
  -4  -2  -9    0.40    1.10
   4   2  10  148.59   12.10
  -4   2 -10  126.59   12.20
   4  -2  10  110.59   12.00
  -4  -2 -10  123.59   12.20
  -4   2 -11    1.50    1.70
   4   2  11    0.60    1.30
  -4  -2 -11   -1.70    1.60
   4  -2  11    1.10    1.30
  -4   2 -12   20.40    3.20
   4   2  12   13.40    2.60
  -4  -2 -12   24.50    3.50
   4  -2  12   16.50    2.80
  -4   3  14    0.40    1.70
   4   3 -14   -1.20    2.00
  -4  -3  14    2.70    1.70
   4   3 -13    1.20    1.50
  -4   3  13    2.20    1.40
   4  -3 -13    3.00    1.20
  -4  -3  13    0.60    1.30
  -4   3  12   19.50    2.60
   4   3 -12   18.40    2.80
  -4  -3  12   13.90    2.40
   4  -3 -12   16.90    2.40
   4   3 -11    1.20    0.90
   4   3 -11    2.20    0.70
  -4   3  11    1.80    1.00
   4  -3 -11    2.10    0.90
  -4  -3  11    1.70    1.00
   4   3 -10   74.99    7.30
  -4   3  10   91.59    7.40
   4   3 -10   72.29    7.10
   4  -3 -10   68.09    7.10
   4   3  -9   18.70    2.00
  -4   3   9   16.60    2.00
   4   3  -9   13.80    1.70
  -4  -3   9   13.40    2.10
   4  -3  -9   18.20    1.90
   4   3  -8  278.27   28.40
   4   3  -8  299.17   28.30
  -4   3   8  324.17   28.40
  -4  -3   8  309.27   28.50
   4  -3  -8  354.76   28.40
   4   3  -7   24.50    2.20
   4   3  -7   25.10    2.20
  -4   3   7   24.80    2.30
  -4   3   7   18.70    2.30
   4  -3  -7   20.10    2.20
  -4  -3   7   16.70    2.20
  -4  -3   7   21.90    2.40
  -4   3   6  701.13   68.89
  -4   3   6  791.62   68.99
   4   3  -6  733.73   68.89
  -4  -3   6  714.43   68.89
   4  -3  -6  884.41   68.99
   4   3  -5   16.10    1.70
  -4   3   5   15.20    1.50
  -4   3   5   15.70    1.60
   4   3  -5   14.80    1.60
  -4   3   5   12.70    1.60
  -4   3   5   14.50    1.60
   4  -3  -5   16.20    1.60
  -4  -3   5   16.30    1.70
  -4  -3   5   14.50    1.50
   4  -3  -5   12.50    1.60
   4   3  -4 1456.05  149.69
   4  -3  -4 1888.61  149.69
   4  -3  -4 1646.34  149.69
   4   3  -3   29.50    2.90
   4   3  -3   31.30    3.00
   4   3  -3   34.40    3.10
  -4   3   3   29.40    3.00
  -4   3   3   33.60    3.00
  -4   3   3   32.50    3.00
   4  -3  -3   29.80    3.00
   4   3  -2 1341.47  137.39
  -4   3   2 1386.96  137.39
  -4  -3   2 1654.53  137.59
   4  -3  -2 1618.44  137.39
  -4  -3   2 1634.24  137.39
   4   3  -1    7.90    1.00
  -4   3   1    9.10    1.10
   4   3  -1   11.30    1.00
  -4   3   1    8.60    1.10
  -4   3   1   11.90    1.10
   4   3  -1    9.50    1.10
  -4  -3   1   10.80    1.10
   4  -3  -1   10.30    1.00
   4  -3  -1    8.70    1.10
   4  -3  -1   11.60    1.10
  -4   3   0 2047.20  178.98
  -4   3   0 1649.13  178.68
   4   3   0 2153.48  179.08
   4   3   0 1816.02  178.68
   4   3   0 1683.03  178.68
   4  -3   0 2214.28  178.98
  -4  -3   0 2138.29  179.08
   4  -3   0 2206.78  178.98
  -4   3  -1   16.40    1.60
   4   3   1   14.10    1.60
   4   3   1   14.80    1.70
   4   3   1   17.80    1.70
   4  -3   1   14.60    1.70
  -4  -3  -1   16.70    1.60
   4  -3   1   19.00    1.60
  -4   3  -2  705.53   65.09
   4   3   2  691.23   65.09
   4   3   2  745.73   65.09
   4   3   2  676.13   64.99
   4  -3   2  662.83   65.09
   4  -3   2  849.61   64.99
   4   3   3    0.40    0.30
   4   3   3    1.10    0.50
   4   3   3    0.80    0.30
  -4   3  -3    0.10    0.40
   4   3   3    0.50    0.40
   4  -3   3    0.80    0.50
   4  -3   3    1.10    0.40
  -4  -3  -3    0.30    0.40
   4  -3   3   -0.10    0.40
   4  -3   3    0.60    0.20
   4   3   4   36.00    3.90
   4   3   4   36.90    4.00
   4   3   4   46.40    4.00
  -4   3  -4   42.00    4.10
  -4  -3  -4   40.60    4.00
   4  -3   4   50.39    4.10
   4   3   5    0.00    0.40
   4   3   5   -0.30    0.30
  -4   3  -5    0.50    0.50
  -4  -3  -5    0.30    0.50
   4  -3   5    0.40    0.50
  -4   3  -6    1.50    0.70
   4   3   6    3.10    0.50
   4   3   6    3.60    0.70
  -4  -3  -6    1.70    0.50
  -4  -3  -6    1.80    0.70
   4  -3   6    4.10    0.90
   4   3   7    4.40    0.90
  -4   3  -7    6.70    1.20
   4   3   7    4.20    0.70
  -4  -3  -7    4.40    1.00
   4  -3   7    3.20    0.90
  -4  -3  -7    3.30    0.70
  -4   3  -8   26.90    3.10
  -4  -3  -8   24.60    2.50
  -4  -3  -8   23.50    3.00
   4   3   9   -1.80    0.90
  -4   3  -9    0.40    1.10
   4  -3   9    0.00    0.90
  -4  -3  -9    1.00    1.10
  -4   3 -10  162.88   14.80
  -4  -3 -10  160.48   14.90
   4  -3  10  146.39   14.70
   4   3  11    1.50    1.60
  -4   3 -11   -0.40    1.50
   4  -3  11    4.40    1.50
  -4  -3 -11    1.50    1.80
  -4   3 -12   92.69    9.10
   4  -3  12   80.59    8.70
   4   4 -14   69.69    7.70
  -4   4  14   59.69    7.50
  -4  -4  14   87.39    7.70
   4   4 -13    3.10    1.60
  -4   4  13   -1.70    2.10
  -4   4  13    2.30    1.40
  -4  -4  13    1.10    1.50
   4  -4 -13    3.90    1.30
  -4   4  12  102.29    8.60
   4   4 -12   80.59    8.40
   4  -4 -12   87.09    8.30
  -4  -4  12   79.49    8.60
   4   4 -11    0.90    1.00
   4   4 -11    0.80    0.60
  -4   4  11    1.20    1.00
  -4  -4  11    0.50    1.10
   4  -4 -11   -0.30    0.80
   4   4 -10  161.08   14.70
   4   4 -10  157.08   14.50
   4  -4 -10  164.58   14.60
  -4  -4  10  153.88   14.90
   4   4  -9   -0.20    0.50
   4   4  -9   -0.20    0.60
  -4   4   9    0.80    0.70
  -4   4   9   -0.10    0.90
  -4  -4   9   -0.10    0.90
   4  -4  -9   -0.10    0.60
   4   4  -8  164.18   17.50
   4   4  -8  201.28   17.50
  -4   4   8  186.48   17.60
   4   4  -8  214.08   17.60
  -4  -4   8  199.68   17.70
   4  -4  -8  188.78   17.50
  -4   4   7   14.40    1.70
  -4   4   7   13.90    1.80
   4   4  -7   18.20    1.90
   4   4  -7   13.80    1.60
  -4   4   7   14.30    1.80
   4   4  -7   15.00    1.70
   4  -4  -7   14.70    1.70
  -4  -4   7   11.30    1.70
  -4  -4   7   15.00    1.70
   4   4  -6   60.69    6.10
  -4   4   6   69.19    6.10
   4   4  -6   68.89    6.10
  -4   4   6   62.59    6.10
   4   4  -6   66.39    6.10
   4  -4  -6   66.89    6.10
   4  -4  -6   61.89    6.10
  -4  -4   6   64.99    6.20
   4   4  -5    1.20    0.40
   4   4  -5    1.70    0.50
   4   4  -5    1.80    0.60
  -4   4   5    0.70    0.40
  -4   4   5    1.70    0.50
   4   4  -5    2.30    0.40
  -4   4   5    1.60    0.50
   4  -4  -5    1.30    0.40
   4  -4  -5    1.00    0.40
  -4  -4   5    1.40    0.40
  -4  -4   5    1.10    0.50
   4   4  -4   55.59    4.60
   4   4  -4   43.50    4.60
   4   4  -4   44.80    4.50
  -4   4   4   54.59    4.60
   4   4  -4   40.60    4.60
  -4  -4   4   56.89    4.60
  -4  -4   4   53.39    4.70
   4  -4  -4   45.30    4.60
   4  -4  -4   49.80    4.60
   4   4  -3  131.99   14.00
  -4   4   3  154.58   14.00
  -4   4   3  164.38   13.90
   4   4  -3  167.48   13.90
   4   4  -3  155.08   14.00
  -4  -4   3  162.78   13.90
   4  -4  -3  162.78   13.90
   4  -4  -3  128.99   13.90
   4  -4  -3  152.08   13.90
  -4   4   2  314.37   29.10
   4   4  -2  316.47   29.10
  -4  -4   2  331.27   29.20
   4  -4  -2  327.87   29.10
  -4   4   1    0.10    0.20
   4   4  -1    0.20    0.20
   4   4  -1    0.50    0.30
   4   4  -1    0.70    0.40
  -4   4   1    1.30    0.30
  -4   4   1    0.50    0.30
   4  -4  -1    0.10    0.30
   4  -4  -1    0.40    0.30
  -4  -4   1    0.30    0.30
   4   4   0   76.59    6.60
  -4   4   0   62.49    6.60
   4  -4   0   68.49    6.50
  -4  -4   0   76.79    6.60
   4  -4   0   69.29    6.60
  -4  -4   0   77.69    6.60
   4   4   1   38.50    3.90
   4   4   1   48.50    3.90
   4   4   1   45.10    3.90
   4  -4   1   39.80    3.90
  -4  -4  -1   34.70    3.90
   4  -4   1   35.20    3.90
   4  -4   1   46.60    3.80
  -4   4  -2  877.61   73.79
   4   4   2  757.62   73.79
   4   4   2  707.83   73.79
   4  -4   2  692.23   73.79
  -4  -4  -2  897.61   73.79
   4  -4   2  900.41   73.89
   4  -4   2  899.91   73.69
   4   4   3  107.99   11.80
   4  -4   3  127.89   11.80
   4  -4   3  137.09   11.80
  -4  -4  -3  134.49   11.80
   4  -4   3  136.29   11.60
  -4   4  -4 1008.30   93.59
   4   4   4 1022.10   93.49
  -4  -4  -4 1064.69   93.49
   4  -4   4 1057.99   93.59
  -4   4  -5    0.60    0.50
   4   4   5    0.00    0.40
   4   4   5   -0.30    0.40
  -4  -4  -5    0.20    0.50
   4  -4   5   -0.70    0.50
  -4  -4  -5    0.10    0.40
   4   4   6  374.26   38.00
  -4   4  -6  444.96   38.30
  -4  -4  -6  424.26   38.30
   4  -4   6  444.76   38.30
  -4   4  -7   10.90    1.60
   4   4   7    9.10    1.20
   4   4   7    9.90    1.50
   4  -4   7    7.70    1.40
  -4  -4  -7    7.40    1.10
  -4  -4  -7    6.00    1.30
  -4  -4  -8  287.17   25.90
   4  -4   8  270.17   25.80
  -4  -4  -8  288.87   25.60
  -4   4  -9   -0.50    1.00
   4   4   9   -0.80    1.00
  -4  -4  -9    0.40    0.70
   4  -4   9   -0.50    1.00
  -4   4 -10   79.39    8.00
   4   4  10   78.49    7.80
   4  -4  10   79.79    7.90
  -4   4 -11   -0.30    1.50
   4   4  11   -2.00    1.40
   4  -4  11    0.30    1.30
   4   4  12   26.90    3.80
   4  -4  12   33.20    4.40
  -4   5  14    1.00    2.90
  -4   5  14    0.50    1.80
   4   5 -14    1.90    2.20
  -4  -5  14    3.60    2.00
  -4   5  13    1.50    1.40
  -4   5  13   -0.70    1.90
   4   5 -13   -0.80    1.60
   4  -5 -13    0.70    1.30
  -4  -5  13    0.00    1.40
  -4   5  12    5.40    1.90
   4  -5 -12    4.50    1.20
  -4  -5  12    4.60    1.50
  -4   5  11   38.20    3.90
   4   5 -11   39.50    3.50
  -4   5  11   34.80    4.30
   4   5 -11   39.90    4.00
  -4  -5  11   29.90    4.10
   4  -5 -11   29.60    3.70
   4   5 -10   15.70    2.00
  -4   5  10   13.20    2.30
   4   5 -10   19.60    2.40
  -4   5  10   20.80    2.30
   4  -5 -10   21.70    2.30
  -4  -5  10   14.40    2.40
  -4   5   9   58.19    5.30
   4   5  -9   50.79    5.30
   4   5  -9   64.59    5.20
  -4   5   9   51.69    5.50
   4  -5  -9   52.09    5.30
  -4  -5   9   50.49    5.50
   4   5  -8  270.57   25.90
   4   5  -8  331.97   26.00
   4  -5  -8  270.57   25.90
  -4  -5   8  269.47   26.10
  -4   5   7    0.50    0.60
   4   5  -7    0.80    0.50
  -4   5   7    1.20    0.50
   4   5  -7    1.60    0.50
   4   5  -7    0.70    0.80
  -4  -5   7    0.10    0.50
   4  -5  -7    0.40    0.40
  -4  -5   7    0.90    0.70
  -4   5   6  762.02   77.59
  -4   5   6  861.21   77.59
   4   5  -6  898.31   77.59
   4  -5  -6  876.71   77.59
  -4  -5   6  907.91   77.69
  -4   5   5   71.09    6.50
   4   5  -5   73.39    6.50
  -4   5   5   74.99    6.50
  -4   5   5   58.09    6.50
  -4  -5   5   74.69    6.60
  -4  -5   5   65.39    6.50
   4  -5  -5   70.59    6.50
   4   5  -4 1403.06  113.09
   4   5  -4 1273.97  112.99
  -4   5   4 1369.36  112.99
   4   5  -4 1056.79  112.99
   4  -5  -4 1341.97  112.99
  -4  -5   4 1148.39  112.99
   4  -5  -4 1087.29  112.99
  -4  -5   4 1364.16  113.09
   4   5  -3    1.30    0.50
  -4   5   3    1.60    0.40
  -4   5   3    1.50    0.30
   4   5  -3    0.70    0.40
  -4   5   3    1.50    0.40
   4  -5  -3    1.60    0.40
  -4  -5   3    1.50    0.50
  -4  -5   3    1.50    0.40
   4  -5  -3    1.00    0.40
   4  -5  -3    1.20    0.40
   4   5  -2 1455.05  126.19
  -4   5   2 1299.17  126.19
   4   5  -2 1365.26  126.19
   4  -5  -2 1414.46  126.19
  -4  -5   2 1472.95  126.19
   4  -5  -2 1429.46  126.19
   4  -5  -2 1377.16  126.19
   4   5  -1   18.50    1.70
   4   5  -1   13.40    1.70
   4   5  -1   20.20    1.70
  -4   5   1   18.90    1.70
  -4   5   1   16.00    1.70
   4  -5  -1   16.90    1.70
  -4  -5   1   14.10    1.70
  -4  -5   1   17.70    1.80
   4  -5  -1   14.60    1.70
   4  -5  -1   15.20    1.60
   4   5   0  748.13   79.79
  -4   5   0  909.11   79.79
   4   5   0  871.31   79.69
  -4  -5   0 1003.80   79.79
   4  -5   0  764.22   79.79
   4  -5   0  903.21   79.79
  -4  -5   0 1001.70   79.79
   4   5   1   -0.10    0.30
   4   5   1    0.00    0.30
   4   5   1    0.10    0.30
   4   5   1    0.00    0.30
  -4   5  -1    0.50    0.30
  -4   5  -1   -0.10    0.30
  -4  -5  -1    0.10    0.20
   4  -5   1   -0.10    0.40
   4  -5   1    0.10    0.20
   4  -5   1    0.10    0.30
  -4  -5  -1    0.30    0.30
   4  -5   1    0.20    0.40
   4   5   2  958.70   83.39
   4   5   2  769.42   83.49
  -4   5  -2 1019.20   83.39
   4   5   2  852.11   83.49
  -4   5  -2  985.40   83.49
   4  -5   2 1007.40   83.49
   4  -5   2  834.02   83.49
  -4  -5  -2  984.70   83.49
  -4   5  -3  127.99   13.90
  -4   5  -3  153.48   13.80
   4   5   3  134.29   13.90
   4  -5   3  169.48   14.00
  -4  -5  -3  167.28   13.90
   4  -5   3  161.38   13.70
  -4   5  -4  112.69   10.30
   4   5   4  109.49   10.20
   4   5   4  112.09   10.10
  -4  -5  -4  118.89   10.20
   4  -5   4  113.39   10.30
   4  -5   4   99.69   10.00
   4   5   5   13.40    1.60
   4   5   5   14.20    1.80
  -4   5  -5   11.80    1.60
  -4  -5  -5   14.30    1.60
   4  -5   5   10.30    1.60
  -4   5  -6   10.50    1.60
   4   5   6   11.50    1.50
   4  -5   6   11.40    1.60
  -4  -5  -6    8.50    1.40
   4   5   7   24.50    2.80
  -4   5  -7   24.00    2.90
   4  -5   7   23.60    2.80
  -4  -5  -7   26.00    2.60
  -4   5  -8   52.79    5.50
   4   5   8   54.49    5.40
   4  -5   8   57.09    5.50
  -4  -5  -8   52.49    5.20
   4   5   9   20.20    2.70
  -4   5  -9   20.00    2.70
  -4  -5  -9   18.80    2.30
   4  -5   9   15.60    2.70
  -4   5 -10   46.90    5.00
   4  -5  10   41.80    4.90
   4   5  11    5.80    1.70
  -4   5 -11    3.70    1.80
   4  -5  11    4.50    1.60
   4   6 -13   -2.20    1.50
  -4   6  13   -1.20    2.00
  -4   6  13    2.40    1.60
   4  -6 -13   -0.50    1.40
  -4  -6  13    0.70    1.50
  -4   6  12  120.29   11.50
   4   6 -12  115.79   11.10
  -4   6  12  110.89   11.00
  -4  -6  12  116.89   11.20
  -4   6  11    2.70    1.10
   4   6 -11    2.50    1.20
   4   6 -11    3.60    0.80
  -4   6  11    4.20    1.60
   4  -6 -11    3.70    1.00
  -4  -6  11    2.10    1.30
   4   6 -10  296.57   26.90
  -4   6  10  268.47   27.20
   4   6 -10  304.67   27.10
  -4   6  10  334.67   27.10
   4  -6 -10  279.77   27.10
   4   6  -9   33.70    3.40
   4   6  -9   36.20    3.60
  -4   6   9   35.40    3.80
  -4   6   9   36.50    3.50
   4  -6  -9   31.20    3.50
  -4  -6   9   35.30    3.80
  -4   6   8  353.46   31.70
   4   6  -8  343.27   31.50
  -4   6   8  390.16   31.60
   4  -6  -8  306.17   31.60
   4   6  -7   16.40    1.90
  -4   6   7   13.20    2.00
   4   6  -7   18.30    1.90
  -4   6   7   18.50    1.90
   4  -6  -7   17.90    2.10
  -4  -6   7   15.10    2.10
   4  -6  -7   19.30    2.00
  -4   6   6   88.09    8.50
   4   6  -6  106.59    8.50
  -4   6   6   95.49    8.40
   4   6  -6   86.19    8.40
   4  -6  -6  106.39    8.50
   4  -6  -6   77.29    8.40
  -4  -6   6   79.29    8.50
   4   6  -5   25.60    2.30
  -4   6   5   21.30    2.10
   4   6  -5   21.40    2.10
   4   6  -5   16.50    1.90
  -4  -6   5   23.50    2.20
   4  -6  -5   16.10    2.00
   4  -6  -5   22.10    2.10
  -4  -6   5   15.50    2.10
  -4   6   4    1.50    0.40
   4   6  -4    1.00    0.60
   4   6  -4    2.70    0.40
  -4   6   4    1.10    0.50
   4   6  -4    1.40    0.50
   4  -6  -4    0.70    0.40
   4  -6  -4    1.90    0.40
  -4  -6   4    0.30    0.50
  -4  -6   4    1.20    0.60
  -4   6   3   79.19    6.40
  -4   6   3   74.79    6.40
  -4   6   3   69.39    6.30
   4  -6  -3   58.39    6.30
   4  -6  -3   76.29    6.40
  -4  -6   3   64.19    6.40
   4  -6  -3   58.19    6.40
  -4  -6   3   69.99    6.40
  -4   6   2    4.60    0.60
   4   6  -2    2.90    0.50
   4   6  -2    5.30    0.80
  -4   6   2    3.30    0.60
  -4   6   2    3.20    0.50
   4  -6  -2    1.50    0.60
   4  -6  -2    3.10    0.50
   4  -6  -2    3.10    0.50
  -4  -6   2    3.00    0.60
  -4  -6   2    3.40    0.70
  -4   6   1    0.40    0.30
  -4   6   1    1.00    0.40
   4   6  -1    0.60    0.30
   4   6  -1    0.60    0.50
  -4   6   1    1.00    0.40
  -4  -6   1    0.40    0.50
  -4  -6   1    1.50    0.50
   4  -6  -1    0.90    0.40
   4  -6  -1    0.80    0.30
  -4  -6   1    1.20    0.40
   4  -6  -1    1.30    0.40
  -4   6   0  662.23   53.79
   4   6   0  577.74   53.79
   4   6   0  558.94   53.79
  -4  -6   0  628.44   53.79
   4  -6   0  623.64   53.79
  -4  -6   0  598.74   53.79
   4  -6   0  527.65   53.79
  -4   6  -1   33.10    3.30
   4   6   1   38.10    3.30
   4   6   1   31.40    3.40
   4   6   1   36.10    3.50
  -4   6  -1   31.40    3.40
  -4  -6  -1   39.60    3.30
   4  -6   1   39.00    3.40
   4  -6   1   38.70    3.50
  -4  -6  -1   37.00    3.40
   4  -6   1   28.40    3.40
  -4   6  -2  870.31   79.49
   4   6   2  995.30   79.59
   4   6   2  840.92   79.59
   4   6   2  838.72   79.39
   4  -6   2  989.10   79.59
   4  -6   2  850.91   79.39
  -4  -6  -2  830.52   79.49
   4  -6   2  846.52   79.59
   4   6   3   38.20    3.60
  -4   6  -3   39.10    3.50
   4   6   3   29.80    3.30
  -4   6  -3   33.10    3.30
   4  -6   3   37.00    3.30
  -4  -6  -3   37.00    3.50
   4  -6   3   33.30    3.50
   4   6   4  809.52   76.29
   4   6   4  843.42   76.49
   4   6   4  751.12   76.29
   4  -6   4  984.80   76.49
   4   6   5   -0.60    0.70
  -4   6  -5    0.60    0.60
   4   6   5    0.70    0.50
  -4  -6  -5    0.70    0.60
   4  -6   5    0.20    0.70
  -4   6  -6  578.24   54.89
   4   6   6  619.04   54.79
  -4  -6  -6  621.04   54.79
  -4   6  -7   13.60    2.20
   4   6   7   18.90    2.10
  -4  -6  -7   17.10    2.00
   4  -6   7   13.60    2.20
  -4   6  -8  144.69   13.90
   4   6   8  143.69   13.70
  -4  -6  -8  155.78   13.70
   4  -6   8  148.19   13.90
  -4   6  -9   10.50    1.70
   4   6   9   12.40    1.80
  -4  -6  -9    9.20    1.50
   4  -6   9    6.90    1.70
  -4   6 -10   95.59    9.30
   4   6  10   99.19    9.20
   4  -6  10   86.59    9.20
  -4   6 -11    1.90    1.70
   4   6  11    0.00    1.60
   4  -6  11   -0.50    1.50
   4   7 -13   16.30    2.90
  -4   7  13   19.90    3.40
  -4   7  13   22.00    3.40
  -4  -7  13   17.80    2.90
   4  -7 -13   25.10    3.40
  -4   7  12    0.00    1.70
  -4   7  12    2.90    1.40
   4   7 -12    1.20    1.50
   4  -7 -12    1.40    1.30
  -4  -7  12    0.50    1.40
   4   7 -11    1.60    1.20
  -4   7  11    2.20    1.10
  -4  -7  11    1.00    1.30
   4   7 -10  110.59   10.20
  -4   7  10  110.19   10.40
  -4   7  10  110.79   10.70
  -4  -7  10  112.49   10.60
   4  -7 -10  111.09   10.40
  -4   7   9    0.50    1.00
   4   7  -9    0.80    0.60
  -4   7   9    0.30    0.70
   4   7  -9    0.10    0.70
   4  -7  -9    1.50    0.80
  -4  -7   9   -0.90    0.80
  -4   7   8  107.99   10.30
   4   7  -8  105.89   10.00
   4   7  -8  124.89   10.10
   4  -7  -8  108.09   10.10
  -4  -7   8   96.19   10.20
  -4   7   7   37.10    3.90
   4   7  -7   40.00    3.70
  -4   7   7   37.30    3.70
   4   7  -7   33.10    3.70
   4  -7  -7   37.60    3.80
   4  -7  -7   43.60    3.90
   4   7  -6  486.05   41.80
   4   7  -6  435.26   41.80
   4  -7  -6  467.05   41.80
  -4   7   5   26.10    2.60
   4   7  -5   29.60    2.60
   4   7  -5   25.30    2.40
   4  -7  -5   24.30    2.50
  -4  -7   5   29.30    2.70
   4  -7  -5   20.10    2.40
  -4  -7   5   19.00    2.60
   4   7  -4 1131.19  102.89
  -4   7   4 1055.69  102.89
  -4   7   4 1145.49  102.79
   4   7  -4 1222.08  102.79
   4  -7  -4 1194.78  102.89
  -4  -7   4 1038.00  102.89
   4  -7  -4 1245.48  102.89
   4  -7  -4 1022.70  102.79
  -4  -7   4 1222.78  102.89
   4   7  -3    6.20    0.80
   4   7  -3    4.10    0.80
  -4   7   3    7.80    1.00
  -4   7   3    6.60    0.80
  -4  -7   3    5.80    1.00
   4  -7  -3    5.70    1.00
   4  -7  -3    6.10    0.90
   4  -7  -3    5.70    0.80
  -4  -7   3    6.90    0.90
   4   7  -2  741.43   72.19
  -4   7   2  894.11   72.29
   4   7  -2  882.61   72.29
  -4   7   2  853.91   72.19
   4  -7  -2  684.43   72.19
   4  -7  -2  879.01   72.29
  -4  -7   2  663.83   72.29
  -4  -7   2  816.02   72.29
  -4   7   1    7.90    1.00
   4   7  -1    8.30    0.90
  -4   7   1    9.20    1.10
   4   7  -1    7.00    1.00
  -4  -7   1    7.30    1.10
   4  -7  -1    7.70    1.00
   4  -7  -1    6.80    1.00
  -4  -7   1    8.00    1.20
  -4  -7   1    7.80    1.00
   4   7   0  731.93   62.99
   4   7   0  782.52   63.19
   4  -7   0  607.04   63.09
   4  -7   0  620.84   62.99
  -4  -7   0  637.34   63.09
  -4  -7   0  831.72   63.09
   4  -7   0  688.03   63.19
   4   7   1   25.10    2.40
  -4   7  -1   19.90    2.40
   4   7   1   23.50    2.60
  -4   7  -1   27.10    2.50
   4  -7   1   25.40    2.40
   4  -7   1   22.10    2.50
  -4  -7  -1   29.90    2.60
   4  -7   1   22.20    2.60
  -4  -7  -1   28.40    2.40
   4   7   2  201.68   17.00
  -4   7  -2  161.28   17.00
   4   7   2  175.28   17.10
   4   7   2  191.78   17.00
   4  -7   2  204.28   17.10
  -4  -7  -2  190.38   17.10
   4   7   3    7.30    1.10
   4   7   3    8.60    1.00
  -4   7  -3    8.80    1.30
  -4   7  -3    7.40    1.10
   4   7   3    9.40    1.30
   4  -7   3    8.50    0.90
  -4  -7  -3    9.10    1.30
   4  -7   3    8.70    1.30
   4   7   4  144.69   11.40
  -4   7  -4  114.19   11.00
   4   7   4  110.29   11.10
   4  -7   4  124.79   11.00
   4  -7   4  107.19   11.20
  -4  -7  -4  130.49   11.20
   4   7   5    0.20    0.80
   4   7   5    1.00    0.60
  -4   7  -5    0.10    0.60
   4   7   5    0.20    0.80
   4  -7   5   -0.60    0.60
  -4  -7  -5    0.40    0.70
   4   7   6   -0.60    0.80
   4   7   6    0.60    0.70
  -4   7  -6    1.40    0.80
   4  -7   6    2.00    0.80
  -4  -7  -6    0.00    0.70
   4   7   7   17.40    2.60
  -4   7  -7   19.60    2.30
   4   7   7   15.20    2.10
  -4  -7  -7   12.50    2.10
   4   7   8   26.10    3.40
  -4   7  -8   23.70    2.90
   4   7   8   22.30    2.80
  -4  -7  -8   21.50    2.70
   4  -7   8   19.80    2.90
   4   7   9   26.80    3.10
   4   7   9   19.80    3.30
  -4   7  -9   25.20    3.30
  -4  -7  -9   24.60    3.00
   4  -7   9   21.70    3.20
   4   7  10    4.60    2.50
   4   7  10    9.40    1.90
  -4   7 -10    9.70    2.00
   4  -7  10    7.00    1.80
   4   7  11    1.80    2.60
  -4   7 -11   -0.60    1.80
   4  -7  11   -0.20    1.60
   4   8 -13    8.50    2.40
  -4   8  13   12.70    3.10
   4  -8 -13   15.70    2.40
  -4  -8  13   10.40    2.40
  -4   8  12   64.69    7.90
   4   8 -12   76.89    7.50
  -4  -8  12   72.99    7.70
   4  -8 -12   78.99    7.50
  -4   8  11   -0.10    1.60
  -4   8  11    3.70    1.30
   4  -8 -11    0.30    1.20
  -4  -8  11    0.90    1.30
  -4   8  10   81.59    8.60
  -4   8  10   89.09    8.30
   4   8 -10   93.49    8.40
   4   8 -10   89.59    8.10
   4  -8 -10   84.99    8.30
  -4  -8  10   79.99    8.50
  -4   8   9    3.10    1.20
   4   8  -9    3.10    0.90
   4   8  -9    1.20    0.70
  -4   8   9    2.90    0.90
  -4  -8   9    2.30    1.00
   4  -8  -9    2.10    0.90
   4   8  -8  124.99   12.40
   4   8  -8  146.59   12.50
  -4   8   8  122.19   12.60
  -4  -8   8  156.98   12.70
   4  -8  -8  125.89   12.50
  -4   8   7   40.60    3.40
   4   8  -7   39.10    3.40
   4   8  -7   38.10    3.40
  -4   8   7   26.80    3.50
  -4  -8   7   27.20    3.50
   4  -8  -7   28.40    3.40
  -4   8   6  141.09   11.30
   4   8  -6  116.09   11.30
  -4  -8   6  134.99   11.50
   4  -8  -6  117.59   11.30
   4  -8  -6  107.39   11.40
   4   8  -5   39.80    3.50
  -4   8   5   30.80    3.60
   4  -8  -5   37.80    3.60
  -4  -8   5   41.00    3.70
   4  -8  -5   32.20    3.50
   4   8  -4    0.00    0.60
  -4   8   4    0.80    0.30
  -4   8   4    0.20    0.50
   4   8  -4    0.10    0.40
  -4  -8   4    0.40    0.50
   4  -8  -4    0.60    0.40
   4  -8  -4    0.50    0.40
  -4   8   3  217.78   22.70
  -4   8   3  248.48   22.60
   4   8  -3  267.47   22.70
  -4  -8   3  265.97   22.70
   4  -8  -3  265.47   22.70
   4  -8  -3  208.88   22.60
  -4  -8   3  279.37   22.80
  -4  -8   3  250.17   22.70
   4   8  -2    6.10    1.00
   4   8  -2    7.30    1.00
  -4   8   2    6.70    1.10
  -4  -8   2    9.30    1.10
   4  -8  -2    8.50    1.00
   4  -8  -2    7.20    1.00
  -4  -8   2    7.10    1.20
   4   8  -1  206.28   19.00
   4   8  -1  206.18   19.10
  -4   8   1  214.68   19.10
  -4  -8   1  208.68   19.00
  -4  -8   1  207.38   19.10
  -4  -8   1  217.08   19.20
   4  -8  -1  209.48   19.10
   4   8   0  362.96   31.30
   4   8   0  329.07   31.40
  -4   8   0  353.16   31.40
   4  -8   0  341.07   31.30
   4  -8   0  347.07   31.40
  -4   8  -1   49.40    4.20
   4   8   1   41.00    4.20
   4   8   1   43.80    4.00
  -4   8  -1   41.30    4.10
   4  -8   1   36.10    4.00
   4  -8   1   49.60    4.30
  -4  -8  -1   44.70    4.20
   4  -8   1   41.60    4.10
   4   8   2  627.54   60.79
  -4   8  -2  643.24   60.79
   4   8   2  601.74   60.69
   4   8   2  819.62   60.99
   4  -8   2  757.12   60.99
   4  -8   2  605.84   60.79
   4   8   3    0.10    0.40
   4   8   3    0.60    0.40
   4   8   3    0.70    0.60
  -4   8  -3    0.10    0.40
  -4   8  -3    0.90    0.50
  -4  -8  -3    0.80    0.60
   4  -8   3   -0.20    0.50
  -4   8  -4  140.39   13.50
   4   8   4  176.88   13.70
   4   8   4  141.09   13.40
  -4   8  -4  150.88   13.30
   4  -8   4  135.29   13.50
  -4  -8  -4  138.89   13.50
  -4   8  -5    0.10    0.60
   4   8   5   -0.40    0.60
   4   8   5   -0.30    0.70
   4   8   5    0.50    0.60
   4  -8   5    0.70    0.30
   4  -8   5    0.00    0.70
  -4  -8  -5    1.10    0.80
  -4   8  -6  293.57   26.70
   4   8   6  291.17   26.90
   4   8   7    2.00    0.90
   4  -8   7    2.20    1.10
  -4  -8  -7    1.50    0.90
   4   8   8  224.78   20.70
  -4   8  -8  218.28   20.50
   4   8   8  239.98   20.30
  -4  -8  -8  218.88   20.30
   4  -8   8  204.58   20.50
  -4   8  -9    3.70    1.40
   4   8   9    5.80    2.00
   4   8   9    2.70    1.40
  -4  -8  -9    4.10    1.40
   4  -8   9    3.30    1.30
  -4   8 -10   30.90    4.00
   4   8  10   25.30    4.00
   4  -8  10   30.00    3.90
  -4   8 -11   45.50    6.00
   4   8  11   63.39    7.10
   4  -8  11   48.50    5.90
  -4   9  12   10.60    2.70
   4   9 -12   10.60    2.10
  -4  -9  12   11.30    2.30
   4  -9 -12   11.60    2.10
  -4   9  11   28.30    3.70
   4   9 -11   26.90    3.50
   4  -9 -11   26.10    3.40
  -4  -9  11   23.10    3.50
  -4   9  10   34.80    4.80
   4   9 -10   37.70    4.30
   4   9 -10   49.99    4.10
   4  -9 -10   38.30    4.30
  -4  -9  10   35.10    4.50
  -4   9   9    9.30    1.50
   4   9  -9   13.80    2.00
  -4   9   9    9.00    1.80
   4   9  -9   10.00    1.40
   4  -9  -9   10.70    1.60
  -4  -9   9    7.90    1.70
  -4   9   8  128.99   12.90
  -4   9   8  146.29   12.70
   4   9  -8  131.19   12.70
   4  -9  -8  156.58   12.90
  -4  -9   8  129.69   13.00
  -4   9   7    9.90    1.70
   4   9  -7   15.20    1.70
   4   9  -7   11.40    1.70
  -4   9   7   13.30    1.60
   4  -9  -7   12.20    1.70
  -4  -9   7   10.70    1.70
   4   9  -6  343.67   27.20
  -4  -9   6  258.97   27.30
   4  -9  -6  322.67   27.20
   4  -9  -6  271.87   27.20
   4   9  -5   60.69    5.30
  -4   9   5   55.09    5.40
  -4   9   5   56.89    5.20
   4  -9  -5   51.19    5.20
   4   9  -4  825.12   70.89
  -4   9   4  791.52   70.79
  -4   9   4  686.93   70.99
  -4  -9   4  888.51   70.99
   4  -9  -4  684.63   70.79
   4  -9  -4  844.92   70.99
   4   9  -3    3.00    0.70
  -4   9   3    3.70    0.80
   4   9  -3    2.90    0.80
   4  -9  -3    4.10    0.60
   4  -9  -3    3.90    0.80
  -4  -9   3    3.30    0.70
  -4  -9   3    5.50    0.80
   4   9  -2 1494.15  118.79
  -4   9   2 1291.77  118.79
   4   9  -2 1176.58  118.69
   4  -9  -2 1452.55  118.79
   4  -9  -2 1178.38  118.69
  -4  -9   2 1321.47  118.79
   4   9  -1   48.10    5.20
   4   9  -1   63.69    5.30
  -4   9   1   55.69    5.30
   4  -9  -1   59.09    5.30
  -4  -9   1   59.79    5.40
   4  -9  -1   50.69    5.20
  -4  -9   1   56.39    5.20
   4   9   0  506.95   48.90
  -4   9   0  530.95   48.90
   4  -9   0  537.05   48.80
   4  -9   0  552.44   48.90
  -4  -9   0  565.34   48.90
  -4  -9   0  553.64   48.80
   4   9   1    2.60    0.70
  -4   9  -1    3.50    0.70
   4   9   1    3.20    0.50
   4  -9   1    3.00    0.50
   4  -9   1    2.80    0.70
  -4  -9  -1    3.30    0.80
   4  -9   1    3.90    1.00
   4   9   2  203.18   16.20
   4   9   2  163.38   15.90
  -4   9  -2  183.78   16.10
   4  -9   2  155.48   15.90
  -4  -9  -2  176.48   16.10
   4   9   3   29.80    3.00
  -4   9  -3   28.50    2.90
  -4   9  -3   25.30    2.80
   4  -9   3   27.50    2.70
  -4  -9  -3   26.10    3.00
   4  -9   3   28.50    2.90
  -4   9  -4   50.69    5.00
  -4   9  -4   59.89    5.30
   4   9   4   57.39    5.40
   4   9   4   60.59    5.00
   4   9   4   51.59    5.00
   4  -9   4   45.30    5.20
  -4  -9  -4   48.90    5.20
  -4   9  -5   68.89    6.20
   4  -9   5   62.89    6.20
   4  -9   5   58.99    5.80
  -4  -9  -5   67.09    6.20
  -4   9  -6    0.70    0.90
   4   9   6    0.50    0.70
   4   9   6    0.20    0.90
   4  -9   6   -0.30    0.90
  -4  -9  -6    1.30    0.90
   4   9   7   17.00    2.10
  -4   9  -7   15.60    2.40
   4   9   7   19.70    2.70
   4  -9   7   12.80    2.10
  -4  -9  -7   12.40    2.00
  -4   9  -8   35.60    4.00
   4   9   8   34.50    4.30
  -4  -9  -8   33.70    3.90
   4  -9   8   32.90    4.00
  -4   9  -9   -0.20    1.30
   4   9   9    1.10    1.80
   4  -9   9    0.20    1.30
  -4   9 -10   48.10    6.30
   4   9  10   57.69    6.90
   4  -9  10   69.09    6.40
  -4  10  12   69.39    7.80
  -4 -10  12   63.29    7.40
   4 -10 -12   75.59    7.30
   4  10 -11   12.70    2.40
  -4  10  11   18.10    2.80
  -4 -10  11   15.60    2.60
   4 -10 -11   17.30    2.50
   4  10 -10   42.30    4.70
  -4  10  10   45.50    5.10
  -4 -10  10   45.10    4.90
   4 -10 -10   42.40    4.80
   4  10  -9    0.50    0.80
   4  10  -9    0.90    1.00
  -4  10   9   -0.30    1.20
  -4  10   9    1.20    1.00
  -4 -10   9    0.40    1.10
   4 -10  -9    0.20    1.00
  -4  10   8   54.29    4.90
  -4  10   8   46.00    5.20
   4  10  -8   47.10    5.00
  -4 -10   8   51.99    5.30
   4 -10  -8   52.79    5.20
  -4  10   7    6.00    1.30
   4  10  -7    6.30    1.20
   4  10  -7   11.10    1.40
   4 -10  -7    7.40    1.30
  -4 -10   7    8.00    1.40
   4  10  -6    3.70    0.80
  -4  10   6    2.70    0.60
  -4  10   6    3.40    1.00
   4 -10  -6    3.20    0.80
  -4 -10   6    2.50    1.00
  -4  10   5   34.30    3.30
   4  10  -5   35.20    3.40
  -4  10   5   32.00    3.60
  -4 -10   5   35.50    3.60
   4 -10  -5   36.30    3.50
   4  10  -4   29.20    3.20
  -4  10   4   33.50    3.40
   4 -10  -4   36.70    3.30
   4 -10  -4   33.60    3.10
  -4 -10   4   28.30    3.20
   4  10  -3   16.50    1.80
  -4  10   3   16.70    2.00
   4  10  -3   12.50    1.90
  -4 -10   3   11.90    1.80
   4 -10  -3   13.80    1.60
  -4 -10   3   19.90    1.90
   4 -10  -3   19.80    1.90
   4  10  -2   52.59    4.50
  -4  10   2   42.90    4.50
   4  10  -2   42.80    4.40
   4 -10  -2   41.50    4.30
   4 -10  -2   42.00    4.30
   4 -10  -2   55.09    4.50
  -4 -10   2   51.39    4.60
   4  10  -1   25.00    2.60
   4  10  -1   26.50    2.70
  -4 -10   1   25.90    2.50
   4 -10  -1   24.70    2.60
  -4 -10   1   24.00    2.80
   4 -10  -1   30.70    2.70
   4  10   0  273.57   24.20
  -4  10   0  289.77   24.20
   4  10   0  215.68   24.00
   4 -10   0  272.87   24.10
  -4 -10   0  276.77   24.20
   4 -10   0  269.57   24.10
  -4  10  -1   60.29    6.70
  -4 -10  -1   72.99    6.90
   4 -10   1   71.29    6.70
   4 -10   1   81.89    6.90
   4 -10   1   73.19    6.70
   4  10   2  119.39   10.90
  -4  10  -2  118.79   11.10
   4  10   2  117.79   11.20
   4 -10   2  120.49   11.10
   4 -10   2  138.99   11.00
  -4 -10  -2  102.59   11.10
   4  10   3    0.30    0.70
   4  10   3   -0.50    0.30
  -4  10  -3    0.20    0.60
   4  10   3    0.10    0.30
  -4  10  -3   -1.30    0.70
   4 -10   3    0.80    0.70
   4 -10   3    0.40    0.50
  -4 -10  -3    1.10    0.70
  -4  10  -4  267.17   24.80
   4  10   4  264.47   24.90
   4  10   4  293.97   24.50
  -4 -10  -4  277.77   24.80
   4 -10   4  251.37   24.80
   4  10   5   -1.10    0.80
   4  10   5    0.80    0.60
  -4  10  -5    0.30    0.70
   4 -10   5    1.20    0.80
  -4 -10  -5    0.20    0.80
  -4  10  -6  221.68   20.30
   4 -10   6  216.08   20.30
  -4 -10  -6  222.38   20.30
   4  10   7    0.00    1.30
  -4  10  -7   -0.20    1.10
  -4 -10  -7   -0.70    1.00
   4 -10   7    0.30    1.20
   4  10   8   90.89    8.40
  -4 -10  -8   79.89    8.00
   4 -10   8   74.09    8.00
  -4  10  -9    4.10    1.70
   4  10   9    2.60    2.10
  -4 -10  -9    4.00    1.60
   4 -10   9    4.40    1.70
   4  10  10  101.09   10.60
  -4  10 -10   99.29   10.00
   4 -10  10   99.59   10.10
  -4  11  11   18.00    3.30
   4  11 -11   20.00    3.00
  -4 -11  11   31.80    3.90
   4 -11 -11   27.40    3.70
  -4  11  10    5.60    1.90
   4  11 -10    6.60    1.70
  -4 -11  10    7.80    1.90
   4 -11 -10    9.90    1.70
   4  11  -9   21.90    2.70
  -4  11   9   16.80    2.70
   4 -11  -9   21.80    2.90
  -4 -11   9   21.70    3.10
   4  11  -8  102.09    9.00
   4  11  -8   92.29    8.90
  -4  11   8   92.19    9.20
  -4 -11   8   95.19    9.20
   4 -11  -8   92.89    9.10
  -4  11   7   49.60    5.40
   4  11  -7   61.69    5.20
   4  11  -7   49.20    5.20
  -4 -11   7   49.60    5.40
  -4  11   6  197.78   17.70
  -4  11   6  194.48   17.30
   4 -11  -6  190.18   17.60
  -4 -11   6  183.08   17.70
  -4  11   5    4.60    1.10
   4  11  -5    3.90    0.90
  -4 -11   5    4.90    1.10
   4 -11  -5    5.20    1.00
   4  11  -4  124.49   11.70
  -4  11   4  117.69   11.80
  -4 -11   4  152.68   11.80
   4 -11  -4  122.09   11.80
   4 -11  -4  120.89   11.50
   4  11  -3    0.80    0.80
   4  11  -3    2.90    0.70
  -4  11   3    2.10    0.80
   4 -11  -3    1.50    0.50
  -4 -11   3    3.00    0.70
  -4 -11   3    1.80    0.80
   4 -11  -3    1.50    0.70
   4 -11  -3    2.80    0.60
   4  11  -2  177.08   16.10
  -4  11   2  168.88   16.30
  -4 -11   2  178.58   16.30
   4 -11  -2  179.98   16.10
   4 -11  -2  179.58   16.10
   4  11  -1   -0.20    0.50
  -4  11   1   -0.20    0.50
   4  11  -1   -0.20    0.60
   4 -11  -1    0.50    0.60
  -4 -11   1    0.50    0.40
   4 -11  -1    0.50    0.50
  -4 -11   1   -0.60    0.60
  -4  11   0  373.16   31.50
   4 -11   0  364.86   31.40
  -4 -11   0  284.47   31.20
   4 -11   0  391.36   31.40
   4 -11   0  339.67   31.30
  -4 -11   0  326.37   31.50
  -4  11  -1   22.70    2.90
   4  11   1   28.40    3.00
  -4 -11  -1   27.00    3.10
   4 -11   1   29.20    2.80
   4 -11   1   31.80    2.90
   4  11   2  103.39    9.70
  -4  11  -2   92.59    9.60
   4 -11   2  112.69    9.60
   4 -11   2  116.59    9.50
  -4 -11  -2   88.39    9.70
   4  11   3   82.19    7.60
  -4  11  -3   78.09    7.50
   4 -11   3   77.89    7.30
   4 -11   3   75.69    7.40
   4  11   4   18.50    2.20
  -4  11  -4   11.20    1.90
   4 -11   4   11.80    1.60
  -4 -11  -4   18.40    2.20
   4 -11   4   12.10    1.90
  -4  11  -5  101.79    9.60
   4 -11   5   99.09    9.60
   4 -11   5   97.29    9.20
  -4 -11  -5  105.99    9.60
  -4  11  -6    1.00    1.10
   4  11   6    0.70    1.20
   4 -11   6   -0.90    1.10
  -4  11  -7   32.90    3.70
   4  11   7   28.30    4.10
  -4 -11  -7   34.20    3.90
   4 -11   7   27.50    3.80
  -4  11  -8    8.60    1.80
   4  11   8    9.20    2.20
  -4 -11  -8    8.60    1.90
   4 -11   8   10.40    2.00
  -4  11  -9    9.20    2.00
   4  11   9    7.80    2.50
  -4 -11  -9    9.90    2.10
   4 -11   9    7.10    2.10
  -4  12  11    3.30    2.20
   4  12 -11    2.10    1.80
   4 -12 -11    3.10    1.90
  -4 -12  11    4.80    2.00
   4  12 -10   73.29    7.80
  -4  12  10   78.19    8.20
   4 -12 -10   81.29    8.00
  -4 -12  10   82.79    8.10
   4  12  -9    1.60    1.20
   4  12  -9   -0.10    1.10
  -4  12   9   -0.10    1.50
  -4 -12   9    3.10    1.60
   4 -12  -9    0.70    1.20
  -4  12   8   33.60    4.50
   4  12  -8   42.00    4.20
   4 -12  -8   44.90    4.40
   4  12  -7   22.70    2.50
   4  12  -7   15.50    2.60
  -4 -12   7   21.30    2.80
   4 -12  -7   18.90    2.60
  -4  12   6   45.50    4.80
   4 -12  -6   45.30    4.70
  -4 -12   6   48.20    4.90
  -4  12   5    7.10    1.30
   4  12  -5    5.90    1.10
   4 -12  -5    5.30    1.20
  -4 -12   5    7.20    1.30
  -4  12   4   13.70    1.90
   4  12  -4    9.70    1.60
  -4 -12   4   10.00    1.60
  -4 -12   4   11.90    1.60
   4 -12  -4    8.70    1.40
  -4  12   3   64.29    7.00
   4  12  -3   82.79    7.00
  -4 -12   3   78.59    7.00
  -4 -12   3   68.19    6.80
   4 -12  -3   81.69    7.00
   4 -12  -3   65.49    6.70
  -4  12   2   51.09    5.20
   4  12  -2   58.99    5.20
  -4 -12   2   59.99    5.20
   4 -12  -2   49.50    4.90
   4 -12  -2   44.60    5.00
   4  12  -1   38.10    3.80
  -4  12   1   39.20    4.10
  -4 -12   1   44.20    4.20
   4 -12  -1   47.70    4.00
  -4 -12   1   35.60    3.80
   4  12   0   92.79    8.50
   4 -12   0   79.49    8.40
   4 -12   0   99.49    8.40
   4  12   1   46.00    4.80
   4 -12   1   48.20    4.70
   4 -12   1   50.09    4.70
  -4  12  -2  233.78   21.20
   4  12   2  222.08   21.20
   4 -12   2  233.48   21.10
   4 -12   2  235.68   21.10
  -4  12  -3   25.90    3.00
   4  12   3   25.40    3.10
   4 -12   3   24.70    2.90
  -4 -12  -3   30.80    3.20
  -4  12  -4  288.57   25.90
   4 -12   4  279.57   25.90
   4 -12   4  282.57   25.70
  -4  12  -5    0.00    0.90
   4  12   5    0.30    1.00
   4 -12   5    0.80    0.60
   4 -12   5   -0.90    1.00
  -4 -12  -5    1.30    1.10
   4  12   6  209.78   20.10
  -4  12  -6  216.18   19.90
  -4 -12  -6  216.08   20.00
   4 -12   6  219.98   20.00
  -4  12  -7    3.20    1.40
   4  12   7    3.60    1.70
  -4 -12  -7    2.30    1.50
   4 -12   7    2.80    1.50
  -4  12  -8   73.19    7.80
   4  12   8   76.59    8.30
  -4 -12  -8   83.09    8.00
   4 -12   8   77.39    7.90
  -4  12  -9   10.10    2.50
   4  12   9   11.20    2.90
  -4 -12  -9   14.20    2.60
   4 -12   9   11.40    2.60
   4  13 -10    3.10    1.70
  -4  13  10    2.50    2.00
   4 -13 -10    3.20    1.80
  -4 -13  10    0.70    1.90
  -4  13   9   14.10    2.60
   4  13  -9   19.60    2.80
  -4 -13   9   18.70    2.80
   4 -13  -9   16.70    2.50
  -4  13   8   61.29    6.50
   4  13  -8   58.99    6.20
   4  13  -8   58.99    6.20
   4 -13  -8   67.89    6.40
  -4 -13   8   68.89    6.60
  -4  13   7   -0.70    1.00
   4  13  -7    0.20    0.90
   4  13  -7   -0.10    1.10
  -4 -13   7   -0.70    1.40
   4 -13  -7    0.20    1.00
  -4  13   6  142.59   14.90
   4 -13  -6  169.28   14.90
  -4 -13   6  169.98   15.00
  -4  13   5    6.90    1.60
   4  13  -5   12.00    1.60
   4 -13  -5   10.40    1.60
  -4 -13   5   10.90    1.70
   4  13  -4  140.29   12.30
  -4 -13   4  139.69   12.30
  -4 -13   4  117.09   12.20
  -4  13   3   12.20    1.80
   4  13  -3   13.90    1.90
   4 -13  -3   13.50    1.90
  -4 -13   3   13.80    2.00
  -4 -13   3   12.50    1.80
  -4  13   2  136.39   13.60
   4  13  -2  154.08   13.50
   4 -13  -2  131.99   13.30
   4 -13  -2  164.38   13.50
   4  13  -1    4.50    1.00
  -4  13   1    3.10    1.00
  -4 -13   1    5.10    1.20
   4 -13  -1    4.30    1.00
   4  13   0  189.28   15.50
  -4  13   0  160.78   15.40
   4 -13   0  157.98   15.30
   4 -13   0  161.68   15.30
  -4  13  -1    1.30    0.90
   4  13   1    0.70    0.80
  -4 -13  -1    2.30    1.00
   4 -13   1    2.60    0.90
   4 -13   1    2.70    0.80
   4  13   2   62.79    6.10
   4 -13   2   50.39    5.90
   4 -13   2   71.79    5.90
  -4  13  -3    9.60    1.60
   4  13   3    9.70    1.80
   4 -13   3   11.60    1.70
   4 -13   3   14.90    1.70
  -4 -13  -3   10.00    1.70
  -4  13  -4    0.60    0.90
   4  13   4    2.90    1.20
   4 -13   4    0.90    0.80
   4 -13   4    2.90    1.20
  -4 -13  -4    1.70    1.20
  -4  13  -5    3.00    1.20
   4  13   5    2.10    1.20
  -4 -13  -5    1.50    1.20
   4 -13   5    2.40    1.30
  -4  13  -6    3.70    1.30
   4  13   6    1.50    1.50
   4 -13   6    1.80    1.40
  -4 -13  -6    1.50    1.40
   4  13   7   15.20    2.70
  -4  13  -7   16.10    2.60
  -4 -13  -7   20.20    2.80
   4 -13   7   16.70    2.60
  -4  13  -8   17.70    2.80
   4  13   8   13.90    3.00
   4 -13   8   15.30    2.80
  -4 -13  -8   21.10    2.90
  -4  14   9    4.10    1.90
   4  14  -9    3.90    1.50
   4 -14  -9    4.70    1.90
  -4 -14   9    4.50    2.10
   4  14  -8   24.40    3.50
   4  14  -8   28.00    3.40
  -4  14   8   24.60    3.70
   4 -14  -8   30.50    3.70
  -4 -14   8   29.00    4.00
   4  14  -7    0.20    1.40
  -4  14   7   -0.40    1.20
   4  14  -7   -0.90    1.00
   4 -14  -7    2.50    1.30
  -4 -14   7    1.70    1.50
   4  14  -6   -0.40    0.90
  -4  14   6    1.00    1.20
  -4 -14   6    3.10    1.30
   4 -14  -6   -0.90    0.90
  -4  14   5   20.60    3.00
   4  14  -5   29.10    2.90
  -4 -14   5   24.30    3.00
   4 -14  -5   21.80    3.00
  -4  14   4    0.70    1.00
  -4 -14   4    0.30    0.90
   4 -14  -4   -0.30    0.90
  -4 -14   3  128.09   10.30
   4 -14  -3   91.09   10.30
   4  14  -2   29.10    3.10
  -4  14   2   23.20    3.10
  -4  14   1   56.69    6.10
   4  14  -1   65.29    6.00
  -4 -14   1   74.29    6.20
   4 -14  -1   51.29    5.90
   4 -14   0  138.29   11.80
  -4 -14   0  105.79   11.80
   4 -14   0  132.99   11.70
   4  14   1    6.80    1.50
  -4  14  -1    8.20    1.60
   4 -14   1   11.50    1.50
   4 -14   1   12.20    1.60
  -4 -14  -1    9.80    1.70
   4  14   2   51.49    4.90
  -4  14  -2   44.70    4.80
   4 -14   2   44.10    4.60
   4 -14   2   44.40    4.70
  -4 -14  -2   47.40    5.00
  -4  14  -3    9.40    1.70
   4  14   3   12.10    1.90
  -4 -14  -3   11.80    1.90
   4 -14   3   12.60    1.90
   4 -14   3   12.70    1.60
  -4  14  -4   75.09    7.80
   4  14   4   87.09    8.00
  -4 -14  -4   78.89    8.00
   4 -14   4   80.69    7.90
   4  14   5    6.00    1.60
  -4  14  -5    5.10    1.40
  -4 -14  -5    4.60    1.60
   4  14   6   76.09    8.40
  -4  14  -6   77.99    8.20
   4 -14   6   84.69    8.30
  -4 -14  -6   91.99    8.40
   4  14   7    0.40    1.70
  -4  14  -7    1.40    1.60
   4 -14   7    0.60    1.80
  -4 -14  -7    2.10    1.90
   4  15  -8   26.60    3.90
  -4  15   8   27.80    4.00
   4  15  -8   20.50    3.50
  -4 -15   8   35.20    4.30
   4 -15  -8   32.80    4.00
   4  15  -7   46.50    5.30
   4  15  -7   60.89    5.60
  -4  15   7   49.80    5.60
   4 -15  -7   51.99    5.60
  -4  15   6   57.89    6.60
   4  15  -6   63.09    6.40
   4 -15  -6   72.29    6.60
   4  15  -5    4.20    1.20
  -4  15   5    4.80    1.40
   4 -15  -5    2.10    1.20
  -4  15   4  106.89   11.30
   4  15  -4  146.89   11.30
   4 -15  -4  104.89   11.30
  -4  15   3    7.40    1.50
   4  15  -3   10.30    1.50
   4 -15  -3    5.70    1.30
  -4 -15   3    4.50    1.30
  -4  15   2  157.68   16.70
   4  15  -2  207.08   16.70
  -4 -15   2  183.78   16.70
   4 -15  -2  171.18   16.60
   4  15  -1    0.20    0.90
  -4  15   1    1.80    1.20
   4 -15  -1    0.70    0.90
  -4 -15   1   -1.00    1.00
   4  15   0   61.19    6.30
  -4  15   0   67.39    6.40
  -4 -15   0   62.39    6.40
  -4  15  -1   60.59    6.30
   4 -15   1   60.39    6.10
  -4 -15  -1   67.29    6.40
   4  15   2    8.10    1.60
  -4  15  -2    5.90    1.60
   4 -15   2    9.70    1.50
  -4 -15  -2    9.70    1.80
   4  15   3    9.50    1.90
  -4  15  -3   10.60    1.80
   4 -15   3   13.30    2.10
  -4 -15  -3   12.60    2.10
   4 -15   3   12.50    1.80
   4  15   4    8.00    1.80
  -4  15  -4    7.10    1.70
   4 -15   4   13.60    2.10
  -4 -15  -4    9.50    1.90
   4  15   5    9.00    2.00
  -4  15  -5    8.70    1.90
  -4 -15  -5   10.60    2.20
   4 -15   5   10.80    2.20
  -4  15  -6    1.20    1.60
   4  15   6    3.50    2.10
   4 -15   6    6.50    1.90
  -4 -15  -6    6.60    2.00
  -4  16   7    8.20    2.00
   4  16  -7    4.90    1.60
   4  16  -7    8.40    2.00
   4 -16  -7    4.70    1.80
   4  16  -6   11.60    2.10
  -4  16   6   20.50    2.70
   4 -16  -6   13.80    2.40
   4  16  -5   25.60    3.10
  -4  16   5   22.60    3.40
   4 -16  -5   21.90    3.30
  -4  16   4    2.10    1.40
   4  16  -4    2.90    1.30
   4 -16  -4    0.70    1.20
  -4 -16   4    2.80    1.40
  -4  16   3    9.60    2.00
   4  16  -3   11.00    1.80
   4 -16  -3    8.60    1.70
  -4 -16   3    9.60    1.90
  -4  16   2    2.70    1.40
   4  16  -2    3.40    1.20
   4 -16  -2    3.60    1.20
  -4 -16   2    2.00    1.30
   4  16  -1   45.40    4.40
  -4  16   1   34.70    4.30
  -4 -16   1   37.20    4.40
   4 -16  -1   38.10    4.30
   4  16   0   49.40    4.80
  -4  16   0   42.90    4.90
  -4 -16   0   40.90    4.80
   4 -16   0   42.90    4.70
  -4  16  -1    8.90    1.80
   4  16   1    8.20    1.70
  -4 -16  -1   11.50    2.00
   4 -16   1   10.10    1.60
  -4  16  -2  113.49   10.70
   4  16   2  111.39   10.70
  -4 -16  -2  108.89   10.80
   4 -16   2  110.49   10.50
  -4  16  -3    6.00    1.60
   4  16   3    4.70    1.50
  -4 -16  -3    6.70    1.70
  -4  16  -4   30.40    3.90
   4  16   4   27.10    3.90
  -4 -16  -4   32.50    4.20
   4  16   5   10.90    2.30
  -4  16  -5    7.40    2.10
  -4 -16  -5    9.30    2.30
   4  17  -6    9.60    2.10
  -4  17   6   13.30    2.40
   4 -17  -6   12.40    2.20
   4  17  -5    7.20    1.80
  -4  17   5   10.90    2.10
   4 -17  -5   11.00    2.10
   4  17  -4   50.29    5.20
  -4 -17   4   49.10    5.30
   4 -17  -4   45.30    5.30
   4  17  -3    1.70    1.30
  -4  17   3   -0.70    1.30
  -4 -17   3    2.50    1.50
   4 -17  -3    3.80    1.50
   4  17  -2   38.70    4.10
  -4  17   2   35.30    4.20
  -4 -17   2   28.90    4.20
   4 -17  -2   33.70    4.10
   4  17  -1   -0.30    1.20
  -4  17   1    0.80    1.30
   4 -17  -1   -0.10    1.30
  -4 -17   1    1.50    1.40
   4  17   0   14.80    2.30
  -4  17   0   20.90    2.70
   4 -17   0   15.90    2.20
  -4 -17   0   12.80    2.30
  -4  17  -1    3.20    1.50
   4  17   1    1.30    1.30
   4 -17   1    2.30    1.40
  -4 -17  -1    1.60    1.60
  -4  17  -2   19.50    2.70
   4  17   2   15.40    2.60
   4 -17   2   25.40    3.20
  -4 -17  -2   18.00    2.80
  -4  17  -3   10.20    2.10
   4  17   3    6.90    1.80
  -4 -17  -3   10.60    2.30
  -4  18   3   34.10    4.20
   4  18  -3   24.90    4.00
  -4 -18   3   25.10    4.10
   4 -18  -3   38.80    4.20
   4  18  -2    7.40    1.80
  -4  18   2   11.80    2.20
  -4 -18   2    4.20    1.90
   4 -18  -2    8.60    1.80
   4  18  -1   29.80    4.20
  -4  18   1   44.80    4.70
   4 -18  -1   33.00    4.30
  -4 -18   1   36.30    4.50
   4  18   0   17.80    2.70
  -4  18   0   27.00    3.60
   4 -18   0   15.00    2.50
  -4 -18   0   19.80    3.10
  -4  18  -1   35.90    4.40
   4  18   1   30.60    4.00
  -4 -18  -1   35.80    4.40
   4 -18   1   23.00    3.50
  -5   0  14    2.30    1.70
  -5   0  13    0.30    1.30
   5   0 -12    2.30    0.90
  -5   0  12    2.80    1.30
   5   0 -12    1.40    1.20
  -5   0  11    1.20    1.00
   5   0 -11   -1.30    0.80
   5   0 -11    0.30    0.70
   5   0 -10   36.50    3.40
   5   0 -10   27.20    3.20
  -5   0  10   36.20    3.60
   5   0  -9   -1.00    0.50
   5   0  -9   -0.20    0.50
  -5   0   9    0.50    0.70
   5   0  -8  157.08   13.10
  -5   0   8  147.29   13.20
   5   0  -8  125.09   13.00
  -5   0   7    0.90    0.40
   5   0  -7    0.40    0.40
   5   0  -7    0.10    0.40
  -5   0   7   -0.50    0.50
   5   0  -6  859.01   74.19
   5   0  -6  779.92   74.09
  -5   0   6  830.92   74.29
  -5   0   5    0.40    0.40
   5   0  -5    0.20    0.30
   5   0  -5    0.20    0.50
  -5   0   5    0.00    0.30
  -5   0   5    0.20    0.20
  -5   0   4  761.32   78.89
  -5   0   4  991.30   78.99
  -5   0   3   -0.30    0.20
   5   0  -3   -0.20    0.30
  -5   0   3    0.10    0.30
   5   0  -3    0.30    0.30
  -5   0   2 2381.76  214.28
  -5   0   1    0.20    0.30
  -5   0   1    0.10    0.10
   5   0  -1    0.20    0.10
   5   0  -1    0.20    0.30
  -5   0   0 2548.25  222.98
   5   0   0 2530.65  223.28
  -5   0   0 2355.56  223.08
   5   0   1    0.60    0.40
  -5   0  -1    0.30    0.30
   5   0   1    0.10    0.20
   5   0   1   -0.10    0.20
  -5   0  -1    0.00    0.20
   5   0   2 1054.99   94.89
  -5   0  -3   -0.10    0.40
   5   0   3    0.20    0.30
   5   0   3    0.40    0.40
   5   0   3    0.20    0.30
   5   0   3    0.10    0.20
  -5   0  -4  482.25   45.60
   5   0   4  508.25   45.40
   5   0   4  555.14   45.40
   5   0   4  468.65   45.60
   5   0   5    0.20    0.30
   5   0   5    0.40    0.50
   5   0   5    0.30    0.20
  -5   0  -5    0.30    0.60
  -5   0  -6   92.49    9.10
   5   0   6   98.19    8.70
  -5   0  -7    0.70    0.90
   5   0   7   -0.60    0.60
  -5   0  -8    0.10    1.00
   5   0   8    1.50    0.80
  -5   0  -9    0.50    1.30
   5   0   9   -0.30    1.00
  -5   0 -10   93.19    9.50
   5   0  10   97.09    9.30
  -5   0 -11   -1.20    1.80
   5   0  11   -1.00    1.40
  -5   1  14   42.90    5.40
   5   1 -14   49.80    5.60
  -5  -1  14   47.40    5.40
  -5   1  13    5.50    1.60
  -5  -1  13    3.50    1.50
   5  -1 -13    5.50    1.20
   5   1 -12   97.69    8.50
   5   1 -12   88.29    8.70
  -5  -1  12   84.29    8.80
   5  -1 -12   88.99    8.50
  -5   1  11    4.60    1.10
   5   1 -11    4.40    0.90
   5   1 -11    3.90    1.10
   5  -1 -11    4.10    0.90
  -5  -1  11    5.00    1.30
  -5   1  10  262.57   23.70
   5   1 -10  262.37   23.60
  -5  -1  10  250.47   23.70
  -5   1   9    6.10    1.10
   5   1  -9    5.20    0.90
   5   1  -9    6.60    1.00
   5  -1  -9    5.80    0.90
  -5  -1   9    4.60    1.00
   5   1  -8  295.97   28.40
  -5   1   8  264.27   28.40
   5   1  -8  295.87   28.40
  -5   1   8  361.16   28.60
  -5  -1   8  286.57   28.40
  -5  -1   8  357.36   28.60
   5  -1  -8  342.57   28.50
  -5   1   7   10.90    1.40
  -5   1   7    8.60    1.10
   5   1  -7    9.20    1.20
   5   1  -7   11.50    1.30
   5  -1  -7    9.40    1.20
  -5  -1   7   12.40    1.50
  -5  -1   7    9.00    1.10
  -5   1   6  237.58   20.80
   5   1  -6  211.28   20.70
  -5   1   6  217.38   20.60
   5   1  -6  261.87   20.80
  -5  -1   6  222.58   20.80
  -5  -1   6  219.48   20.70
   5  -1  -6  259.77   20.80
  -5  -1   6  202.38   20.60
   5   1  -5   25.70    2.40
  -5   1   5   23.30    2.10
  -5   1   5   20.50    2.30
   5   1  -5   25.20    2.30
  -5   1   5   23.00    2.30
  -5   1   5   23.50    2.20
   5   1  -5   20.60    2.10
   5  -1  -5   24.90    2.30
  -5  -1   5   22.40    2.10
  -5  -1   5   21.60    2.30
   5   1  -4  106.49    9.20
  -5   1   4  102.89    9.30
  -5   1   4  118.49    9.10
   5   1  -4   86.49    9.20
  -5  -1   4  113.69    9.30
   5  -1  -4   87.09    9.20
  -5  -1   4   86.49    9.20
   5   1  -3    0.20    0.30
  -5   1   3    0.30    0.30
   5   1  -3   -0.20    0.30
  -5   1   3    0.60    0.40
  -5  -1   3    0.50    0.40
   5  -1  -3    0.90    0.30
   5  -1  -3    0.50    0.30
  -5  -1   3    0.40    0.30
   5   1  -2    2.80    0.50
  -5   1   2    3.30    0.50
   5  -1  -2    3.00    0.50
   5  -1  -2    3.00    0.40
  -5   1   1    2.40    0.30
   5   1  -1    1.00    0.30
   5   1  -1    1.40    0.20
  -5   1   1    1.40    0.40
   5  -1  -1    1.90    0.40
   5  -1  -1    0.70    0.40
   5   1   0  258.97   20.60
   5   1   0  234.18   20.70
  -5   1   0  248.08   20.70
  -5   1   0  253.17   20.60
   5   1   0  197.68   20.60
   5   1   0  204.98   20.70
  -5   1   0  209.08   20.60
   5  -1   0  200.78   20.70
  -5  -1   0  218.18   20.60
   5  -1   0  222.98   20.60
   5  -1   0  260.97   20.60
  -5   1  -1    0.60    0.30
   5   1   1    1.90    0.40
   5   1   1    0.20    0.20
   5   1   1    0.90    0.40
   5   1   1    0.50    0.30
   5  -1   1    0.80    0.30
   5  -1   1    0.00    0.40
  -5  -1  -1    0.50    0.30
   5  -1   1    0.70    0.30
  -5  -1  -1    0.40    0.20
  -5   1  -2  853.71   75.49
   5   1   2  859.21   75.39
   5   1   2  797.92   75.39
   5  -1   2  746.13   75.39
  -5  -1  -2  866.61   75.49
   5  -1   2  903.31   75.39
   5   1   3    5.00    0.60
  -5   1  -3    4.90    0.80
   5   1   3    5.20    0.70
   5   1   3    4.10    0.70
   5   1   3    4.80    0.90
   5   1   3    4.00    0.70
  -5  -1  -3    4.50    0.70
   5  -1   3    3.40    0.70
   5  -1   3    4.50    0.60
   5  -1   3    4.10    0.70
   5  -1   3    4.30    0.60
  -5   1  -4 1001.20   90.99
   5   1   4 1067.49   90.79
   5   1   4 1019.50   90.79
   5   1   4  988.30   90.99
   5  -1   4  891.01   90.79
   5  -1   4 1055.79   90.79
   5  -1   4  979.30   90.99
  -5  -1  -4 1072.39   90.99
   5   1   5    0.40    0.30
   5   1   5    0.30    0.50
   5   1   5    0.50    0.30
  -5   1  -5    0.40    0.60
   5  -1   5    0.80    0.20
  -5  -1  -5    0.80    0.60
   5  -1   5    0.80    0.50
  -5   1  -6  531.15   49.00
   5   1   6  506.35   48.70
   5  -1   6  593.34   49.00
  -5  -1  -6  533.35   49.00
   5   1   7   45.30    4.30
  -5   1  -7   57.69    4.90
   5   1   7   40.90    4.30
   5   1   7   52.09    4.70
  -5  -1  -7   57.39    5.00
   5  -1   7   37.90    4.60
  -5   1  -8  358.06   32.40
   5  -1   8  350.66   32.30
  -5  -1  -8  354.86   32.40
  -5   1  -9    6.20    1.50
   5   1   9    3.00    1.20
   5  -1   9    5.50    1.30
  -5  -1  -9    3.00    1.40
  -5   1 -10  158.78   14.30
   5   1  10  151.58   14.10
  -5  -1 -10  159.28   14.40
   5  -1  10  130.69   14.00
  -5   1 -11    2.50    2.00
   5   1  11    1.20    1.50
  -5  -1 -11    1.00    1.90
   5  -1  11    1.70    1.50
   5   2 -14   27.10    4.30
  -5   2  14   23.80    4.00
  -5  -2  14   27.90    3.90
  -5   2  13   20.40    2.90
   5  -2 -13   21.60    2.80
  -5  -2  13   19.20    3.00
   5   2 -12    2.70    0.80
   5   2 -12   -0.90    1.20
  -5   2  12    2.10    1.20
  -5  -2  12    1.20    1.20
   5  -2 -12    1.60    1.00
  -5   2  11    1.10    1.00
   5   2 -11   -0.50    0.90
   5   2 -11   -0.20    0.60
   5  -2 -11    0.30    0.70
   5   2 -10   20.60    2.10
  -5   2  10   17.70    2.20
   5   2 -10   14.20    1.80
   5  -2 -10   12.40    1.90
  -5  -2  10   16.10    2.30
   5   2  -9    7.00    1.10
  -5   2   9    6.50    1.20
   5   2  -9    7.80    1.10
   5  -2  -9    9.80    1.30
  -5  -2   9    7.90    1.30
  -5   2   8  272.97   23.00
   5   2  -8  211.68   22.80
   5   2  -8  215.38   22.80
  -5  -2   8  287.37   23.10
   5  -2  -8  277.57   22.90
  -5   2   7    7.40    1.10
  -5   2   7    8.20    1.20
   5   2  -7    9.90    1.20
  -5  -2   7    8.60    1.10
   5  -2  -7    9.10    1.20
  -5  -2   7    9.30    1.40
   5   2  -6  664.63   61.79
   5   2  -6  629.14   61.89
  -5   2   6  659.13   61.89
  -5   2   6  698.43   61.79
  -5  -2   6  646.24   61.99
  -5  -2   6  732.63   61.89
  -5  -2   6  706.33   61.79
   5  -2  -6  752.12   61.89
   5   2  -5    4.20    0.70
  -5   2   5    5.50    0.70
  -5   2   5    6.10    0.90
   5   2  -5    5.40    0.60
  -5   2   5    6.40    0.90
  -5   2   5    6.00    0.70
   5   2  -5    3.90    0.80
  -5  -2   5    4.70    0.90
   5  -2  -5    6.40    1.00
   5  -2  -5    5.90    0.80
  -5  -2   5    6.70    0.70
  -5   2   4 1578.64  149.09
   5   2  -4 1415.86  148.99
   5   2  -4 1812.12  148.99
   5  -2  -4 1720.83  148.99
  -5  -2   4 1753.72  149.09
   5   2  -3   65.79    6.00
  -5   2   3   62.39    6.00
   5   2  -3   72.09    5.90
   5  -2  -3   58.49    6.00
  -5   2   2 1832.62  164.88
   5   2  -1   63.99    6.10
  -5   2   1   75.69    6.10
  -5   2   1   63.89    6.00
   5   2  -1   73.99    6.00
   5   2  -1   58.49    6.10
   5  -2  -1   57.39    6.10
  -5   2   0 2088.79  190.58
   5   2   0 1721.93  190.38
  -5   2   0 2273.37  190.68
   5  -2   0 2272.57  190.58
   5  -2   0 2229.98  190.48
   5   2   1    2.20    0.50
   5   2   1    2.70    0.50
  -5   2  -1    3.10    0.50
  -5   2  -1    3.70    0.50
   5   2   1    3.00    0.60
  -5  -2  -1    3.20    0.50
  -5  -2  -1    2.70    0.50
   5  -2   1    3.60    0.50
   5  -2   1    2.70    0.60
   5  -2   1    2.50    0.40
   5   2   2  630.44   62.39
  -5   2  -2  805.32   62.39
   5   2   2  597.84   62.39
   5   2   2  639.14   62.29
   5  -2   2  787.12   62.29
   5   2   3    0.50    0.30
   5   2   3    0.00    0.50
   5   2   3   -0.70    0.40
  -5   2  -3    0.30    0.40
   5   2   3    0.60    0.40
   5  -2   3    0.40    0.20
   5  -2   3    0.30    0.50
   5  -2   3    0.80    0.30
  -5  -2  -3    0.50    0.40
   5  -2   3    0.20    0.40
   5   2   4  242.58   22.20
  -5   2  -4  267.27   22.30
   5  -2   4  243.38   22.00
  -5  -2  -4  238.48   22.30
   5  -2   4  242.28   22.30
   5  -2   4  234.68   22.00
   5   2   5    9.10    1.30
   5   2   5    8.00    1.00
  -5   2  -5    8.20    1.30
  -5  -2  -5    9.70    1.40
   5  -2   5    9.20    1.30
   5   2   6   32.20    3.00
   5   2   6   26.70    2.60
  -5   2  -6   24.60    3.00
   5  -2   6   26.60    3.00
  -5  -2  -6   25.60    3.10
  -5   2  -7   24.40    2.80
   5   2   7   21.90    2.60
  -5  -2  -7   21.40    2.80
   5  -2   7   21.80    2.60
   5   2   8   16.60    1.90
  -5   2  -8   18.80    2.70
   5   2   8   23.00    2.50
   5  -2   8   21.80    2.50
  -5  -2  -8   16.70    2.70
  -5   2  -9    1.00    1.20
   5  -2   9    2.20    1.20
  -5  -2  -9    0.80    1.30
  -5   2 -10   20.20    2.80
   5   2  10   18.30    2.80
  -5  -2 -10   17.60    2.70
   5  -2  10   13.10    2.30
  -5   2 -11    4.90    2.10
   5   2  11    1.40    1.60
  -5  -2 -11    1.50    2.00
   5  -2  11    3.00    1.50
   5   3 -14   53.89    6.10
  -5   3  14   60.59    6.80
  -5   3  14   43.90    5.80
  -5  -3  14   55.59    6.00
  -5   3  13    8.60    2.30
   5   3 -13   10.00    2.30
  -5   3  13    8.80    1.90
   5  -3 -13    9.10    1.70
  -5  -3  13   13.00    2.30
   5   3 -12  172.38   15.20
  -5   3  12  149.39   15.20
  -5  -3  12  152.68   15.30
   5  -3 -12  177.28   15.10
   5   3 -11    8.20    1.40
  -5   3  11   10.00    1.70
   5   3 -11    7.90    1.20
  -5  -3  11    7.80    1.50
   5  -3 -11    5.60    1.20
  -5   3  10  239.28   21.40
   5   3 -10  225.78   21.20
   5   3 -10  236.08   21.30
  -5  -3  10  234.08   21.60
   5   3  -9    1.70    0.70
  -5   3   9    1.70    0.80
  -5   3   9   -0.10    0.70
   5   3  -9    1.30    0.60
  -5  -3   9    0.60    0.70
   5  -3  -9    1.10    0.60
   5   3  -8  500.85   52.39
  -5   3   8  652.03   52.49
   5   3  -8  613.94   52.49
  -5   3   8  563.14   52.49
  -5   3   8  618.24   52.59
   5  -3  -8  539.55   52.49
  -5   3   7    5.70    0.90
  -5   3   7    8.10    1.10
  -5   3   7    7.00    1.10
   5   3  -7    6.10    0.90
   5  -3  -7    5.70    0.90
  -5  -3   7    5.90    0.90
  -5  -3   7    8.40    1.30
  -5   3   6  285.67   30.60
  -5   3   6  350.26   30.70
   5   3  -6  347.07   30.70
  -5   3   6  341.97   30.70
   5   3  -6  318.07   30.60
  -5  -3   6  288.37   30.60
   5  -3  -6  369.36   30.70
  -5  -3   6  361.56   30.80
   5  -3  -6  393.46   30.80
   5   3  -5    0.30    0.40
  -5   3   5    0.10    0.30
  -5   3   5    0.00    0.40
   5   3  -5    0.30    0.20
  -5   3   5    0.10    0.30
   5  -3  -5    0.70    0.50
  -5  -3   5    0.50    0.30
  -5  -3   5    0.30    0.40
   5  -3  -5    0.10    0.30
  -5   3   4   29.90    2.70
   5   3  -4   28.90    2.60
  -5   3   4   30.30    2.90
   5   3  -4   25.00    2.80
   5  -3  -4   30.40    2.80
  -5  -3   4   27.10    2.80
   5   3  -3    0.50    0.40
   5   3  -3    0.70    0.40
  -5   3   3    0.40    0.40
  -5   3   3    0.50    0.30
   5   3  -3    0.50    0.20
  -5   3   3    0.40    0.20
   5   3  -3    0.40    0.50
   5  -3  -3    0.10    0.30
   5  -3  -3    0.50    0.30
  -5  -3   3    0.60    0.20
  -5  -3   3    0.20    0.40
   5  -3  -3    0.60    0.30
  -5   3   2   38.60    3.40
   5   3  -2   33.40    3.50
  -5   3   2   33.10    3.50
   5   3  -2   38.90    3.40
   5  -3  -2   39.10    3.40
   5   3  -1   30.20    2.50
  -5   3   1   25.50    2.60
  -5   3   1   25.40    2.50
  -5   3   1   26.00    2.60
   5   3  -1   27.70    2.50
   5  -3  -1   29.80    2.50
   5  -3  -1   22.00    2.60
  -5   3   0  205.38   18.00
  -5   3   0  193.98   18.00
  -5   3   0  206.18   18.10
   5   3   0  217.38   18.00
   5   3   0  176.38   18.00
   5   3   0  174.08   18.00
   5   3   0  213.78   18.00
   5  -3   0  229.68   18.00
   5  -3   0  173.18   18.10
  -5   3  -1   26.20    2.50
   5   3   1   23.80    2.50
   5   3   1   24.10    2.60
   5   3   1   28.20    2.50
   5  -3   1   25.80    2.50
  -5  -3  -1   29.50    2.60
   5  -3   1   26.60    2.40
   5  -3   1   21.80    2.60
  -5   3  -2  819.42   73.09
   5  -3   2  803.12   72.99
  -5   3  -3   24.90    2.50
   5   3   3   18.10    2.50
   5   3   3   25.80    2.40
   5  -3   3   24.30    2.20
  -5  -3  -3   26.00    2.50
   5  -3   3   23.60    2.50
   5   3   4  527.95   41.00
   5  -3   4  422.46   41.00
  -5  -3  -4  409.16   41.00
   5   3   5   -0.10    0.50
  -5   3  -5   -0.10    0.60
   5   3   5    0.50    0.40
   5  -3   5    0.80    0.50
  -5  -3  -5    0.30    0.60
   5   3   6  772.22   68.69
  -5   3  -6  678.73   68.69
  -5  -3  -6  777.62   68.79
   5  -3   6  813.42   68.79
   5   3   7    6.40    1.10
  -5   3  -7    3.60    1.10
  -5  -3  -7    5.50    1.30
   5  -3   7    6.80    1.30
   5   3   8  252.37   23.10
  -5   3  -9   13.10    2.00
  -5  -3  -9   13.20    2.20
   5  -3   9    8.90    1.80
  -5   3 -10  151.38   14.00
   5   3  10  140.89   13.80
   5  -3  10  136.89   13.90
  -5  -3 -10  161.58   14.20
  -5   3 -11    2.80    1.80
   5   3  11    1.10    1.70
   5  -3  11    1.70    1.50
  -5   4  14    7.40    2.10
  -5   4  14    7.20    2.70
   5   4 -14   11.70    2.60
  -5  -4  14    9.30    2.30
   5   4 -13    0.30    1.60
  -5   4  13    0.00    1.30
  -5   4  13    1.60    1.90
   5  -4 -13   -2.30    1.10
  -5  -4  13    2.60    1.50
  -5   4  12    6.30    1.90
   5   4 -12    6.50    1.10
   5   4 -12    6.10    1.50
  -5   4  12    6.30    1.50
  -5  -4  12    6.00    1.70
   5  -4 -12    5.50    1.30
   5   4 -11   18.90    2.10
  -5   4  11   14.90    2.40
   5   4 -11   19.70    2.50
  -5   4  11   20.40    2.50
   5  -4 -11   13.70    2.30
  -5  -4  11   17.60    2.60
   5   4 -10   23.70    2.70
  -5   4  10   21.80    3.10
   5   4 -10   28.50    3.00
  -5   4  10   32.60    3.00
  -5  -4  10   31.50    3.30
   5  -4 -10   22.80    2.80
   5   4  -9    3.40    0.80
   5   4  -9    6.30    1.00
  -5   4   9    4.50    1.10
  -5   4   9    5.70    1.00
   5  -4  -9    3.80    0.90
  -5  -4   9    5.50    1.20
  -5   4   8   57.59    5.00
  -5   4   8   55.69    5.00
   5   4  -8   59.89    4.90
   5   4  -8   42.50    4.80
   5  -4  -8   42.90    4.80
  -5  -4   8   48.10    5.10
  -5   4   7   47.90    4.20
   5   4  -7   41.60    4.10
  -5   4   7   47.20    4.20
   5   4  -7   43.30    4.10
  -5  -4   7   40.10    4.10
  -5  -4   7   39.60    4.30
  -5   4   6  742.03   67.39
   5   4  -6  797.92   67.29
   5   4  -6  760.72   67.29
  -5   4   6  629.24   67.29
   5  -4  -6  794.72   67.39
  -5  -4   6  700.63   67.29
   5  -4  -6  766.52   67.29
  -5  -4   6  783.12   67.49
   5   4  -5   71.29    6.20
   5   4  -5   74.99    6.30
  -5   4   5   78.49    6.30
  -5   4   5   62.39    6.30
  -5   4   5   66.39    6.30
  -5  -4   5   60.39    6.30
  -5  -4   5   71.99    6.30
   5  -4  -5   61.79    6.30
   5  -4  -5   60.79    6.30
   5   4  -4 1105.19  100.79
  -5   4   4 1151.28  100.79
  -5   4   4 1093.29  100.79
   5   4  -4  981.80  100.69
   5   4  -4 1265.17  100.89
  -5   4   4 1110.09  100.79
   5   4  -4 1158.78  100.79
   5  -4  -4 1042.60  100.79
  -5  -4   4 1045.50  100.79
  -5  -4   4 1241.38  100.69
   5   4  -3    0.10    0.40
  -5   4   3    0.30    0.30
  -5   4   3    0.30    0.30
   5   4  -3    1.50    0.40
  -5   4   3    0.30    0.20
   5   4  -3    0.50    0.20
   5   4  -3   -0.10    0.30
   5  -4  -3    0.20    0.30
   5  -4  -3    0.90    0.30
  -5  -4   3    0.40    0.30
   5  -4  -3    0.60    0.30
  -5  -4   3    0.30    0.40
  -5   4   2 1116.69   99.69
   5   4  -2 1043.10   99.79
  -5   4   2 1191.48   99.79
  -5   4   2  938.81   99.69
   5   4  -2  939.31   99.69
  -5  -4   2 1283.97   99.79
   5  -4  -2 1074.79   99.69
   5  -4  -2 1274.47   99.69
   5   4  -1    8.90    1.40
  -5   4   1   10.20    1.30
   5   4  -1   10.60    1.30
  -5   4   1   13.20    1.40
   5   4  -1   13.50    1.30
  -5   4   1   13.70    1.30
   5   4  -1   13.90    1.30
   5  -4  -1   14.90    1.30
   5  -4  -1   13.60    1.30
   5  -4  -1   10.90    1.40
   5   4   0 1325.17  108.69
   5   4   0 1130.99  108.69
  -5   4   0 1274.47  108.69
   5  -4   0 1101.19  108.69
   5   4   1    0.50    0.40
   5   4   1    0.40    0.40
  -5   4  -1    0.80    0.30
  -5   4  -1    0.70    0.30
   5   4   1    0.10    0.30
   5   4   1    1.00    0.40
   5  -4   1    0.40    0.40
   5  -4   1    1.10    0.50
   5  -4   1    0.80    0.20
  -5  -4  -1    0.70    0.40
   5   4   2  353.26   39.10
  -5   4  -2  459.85   39.20
  -5  -4  -2  459.65   39.20
   5  -4   2  460.95   39.00
   5   4   3    5.10    0.80
   5   4   3    4.20    0.90
  -5   4  -3    4.60    0.80
  -5   4  -3    4.90    0.70
   5   4   3    4.10    0.70
  -5  -4  -3    4.90    0.80
   5  -4   3    5.60    0.60
   5  -4   3    5.70    0.90
   5   4   4  390.06   36.00
   5   4   4  397.96   36.10
   5  -4   4  342.77   36.20
   5  -4   4  418.26   35.90
  -5  -4  -4  398.66   36.10
   5  -4   4  444.06   35.90
   5   4   5    0.20    0.50
  -5   4  -5    0.60    0.60
   5   4   5    0.40    0.50
  -5  -4  -5   -0.10    0.40
  -5  -4  -5   -1.30    0.60
   5  -4   5   -0.10    0.60
   5   4   6   13.70    1.70
  -5   4  -6   17.70    2.10
   5  -4   6   15.00    1.90
  -5  -4  -6   14.90    1.70
  -5  -4  -6   13.40    2.00
  -5   4  -7    8.20    1.50
   5   4   7    9.20    1.30
  -5  -4  -7    7.60    1.50
  -5  -4  -7    8.40    1.30
   5  -4   7    7.30    1.40
  -5   4  -8    8.90    1.80
   5   4   8   14.20    2.10
   5  -4   8   15.40    2.10
   5   4   9   -0.20    1.10
  -5   4  -9    0.10    1.20
   5  -4   9   -0.20    1.00
   5   4  10    2.90    1.50
  -5   4 -10    4.60    1.60
   5  -4  10   -0.40    1.20
   5   4  11    3.60    1.90
  -5   4 -11    5.80    2.00
   5  -4  11    3.60    1.70
  -5   5  14   76.89    8.20
   5   5 -14   74.19    7.80
  -5   5  14   54.49    7.30
  -5  -5  14   80.09    7.70
  -5   5  13   16.70    3.00
  -5   5  13   16.30    2.60
   5   5 -13   17.50    2.70
  -5  -5  13   20.40    3.00
   5  -5 -13   21.40    2.80
  -5   5  12   96.09   10.30
   5   5 -12  113.49   10.30
  -5   5  12  102.49   10.60
  -5  -5  12  120.69   10.60
  -5   5  11    1.00    1.00
  -5   5  11   -0.90    1.20
   5   5 -11    0.20    0.70
   5   5 -11    0.10    1.10
   5  -5 -11    0.00    0.90
  -5  -5  11    0.70    1.20
   5   5 -10  219.78   19.70
  -5   5  10  200.98   19.80
   5   5 -10  235.98   19.60
  -5  -5  10  205.48   19.90
   5  -5 -10  212.78   19.70
  -5   5   9   24.90    2.60
  -5   5   9   24.50    2.70
  -5  -5   9   20.90    2.80
   5  -5  -9   21.10    2.50
  -5   5   8  304.17   23.00
  -5  -5   8  227.88   23.10
   5  -5  -8  224.78   22.90
  -5   5   7   18.10    2.10
  -5   5   7   22.60    2.20
  -5   5   7   19.60    2.10
   5   5  -7   17.30    2.00
  -5  -5   7   15.30    2.20
  -5  -5   7   18.40    2.10
   5  -5  -7   21.40    2.10
   5   5  -6  620.84   53.89
  -5   5   6  592.04   53.89
   5   5  -6  591.14   53.89
  -5   5   6  618.54   53.89
  -5  -5   6  516.45   53.89
  -5  -5   6  581.24   53.99
   5  -5  -6  651.93   53.99
   5  -5  -6  607.44   53.89
  -5   5   5  173.88   13.90
  -5   5   5  123.89   13.80
  -5   5   5  160.48   13.90
   5   5  -5  165.58   13.90
   5   5  -5  142.99   13.80
  -5  -5   5  139.49   13.90
   5  -5  -5  159.58   13.90
  -5  -5   5  152.38   13.90
   5   5  -4   90.49    7.30
  -5   5   4   76.19    7.40
  -5  -5   4   85.59    7.50
  -5  -5   4   72.69    7.40
   5  -5  -4   66.89    7.40
   5  -5  -4   89.79    7.40
   5   5  -3    7.40    1.10
   5   5  -3    9.90    1.30
   5   5  -3   10.10    0.90
  -5   5   3    8.40    1.10
  -5   5   3    8.20    1.00
  -5   5   3    9.10    1.10
   5  -5  -3    8.40    1.00
  -5  -5   3    8.20    1.10
  -5  -5   3    8.00    1.10
   5  -5  -3    6.40    1.00
   5  -5  -3    9.80    1.10
   5   5  -2   35.10    3.00
  -5   5   2   34.60    3.10
   5   5  -2   25.70    3.00
  -5   5   2   31.00    3.00
   5   5  -2   38.90    3.20
   5  -5  -2   25.20    3.00
  -5  -5   2   35.40    3.10
   5  -5  -2   33.40    3.00
  -5  -5   2   29.80    3.00
   5  -5  -2   28.40    3.00
   5   5  -1  110.49   10.60
  -5   5   1  108.39   10.60
  -5   5   1  130.99   10.70
   5  -5  -1  103.89   10.60
   5  -5  -1  124.49   10.70
   5  -5  -1  120.29   10.60
   5   5   0  193.78   20.70
  -5   5   0  211.98   20.70
   5   5   0  226.48   20.70
  -5   5   0  249.88   20.80
   5  -5   0  257.37   20.70
  -5  -5   0  233.88   20.80
  -5   5  -1   48.10    4.60
  -5   5  -1   53.59    4.60
   5   5   1   41.20    4.60
   5   5   1   42.10    4.60
   5   5   1   48.50    4.60
   5   5   1   57.89    4.70
  -5  -5  -1   52.59    4.60
  -5   5  -2  340.37   34.90
   5   5   2  385.26   35.10
   5   5   2  416.26   35.00
  -5   5  -2  415.66   35.10
   5  -5   2  392.06   35.10
  -5  -5  -2  377.66   35.00
   5  -5   2  384.56   34.90
   5   5   3    3.10    0.70
  -5   5  -3    3.30    0.80
  -5   5  -3    3.90    0.60
   5   5   3    4.60    0.70
   5  -5   3    5.50    0.60
  -5  -5  -3    4.00    0.80
   5  -5   3    3.50    0.80
  -5   5  -4  466.65   49.99
   5   5   4  542.35   49.90
   5   5   4  627.84   49.99
  -5  -5  -4  566.64   49.90
   5  -5   4  566.54   49.70
   5  -5   4  545.65   49.99
  -5   5  -5    7.60    1.30
   5   5   5    9.30    1.30
  -5  -5  -5   11.10    1.30
   5  -5   5    8.30    1.40
  -5   5  -6  407.96   33.00
   5   5   6  329.87   32.80
   5  -5   6  319.27   32.90
  -5  -5  -6  390.96   32.80
   5   5   7    2.50    0.90
  -5   5  -7    1.50    1.00
  -5  -5  -7    0.70    0.70
   5  -5   7    1.60    0.90
  -5   5  -8  264.27   24.40
  -5  -5  -8  270.57   24.10
   5  -5   8  259.77   24.40
   5   5   9    1.10    1.20
  -5   5  -9   -0.10    1.20
   5  -5   9    2.00    1.10
  -5   5 -10   47.20    5.40
   5   5  10   49.10    5.20
   5  -5  10   43.20    5.10
   5   5  11   20.60    3.20
  -5   5 -11   28.60    4.20
   5  -5  11   20.50    3.10
  -5   6  13    4.40    2.20
  -5   6  13    1.90    1.70
   5   6 -13    1.70    1.70
  -5  -6  13    3.80    1.70
   5  -6 -13    5.60    1.50
  -5   6  12    1.70    1.70
   5   6 -12    1.10    1.30
  -5  -6  12    0.90    1.60
   5  -6 -12    0.10    1.10
   5   6 -11   10.60    1.70
  -5   6  11    8.90    1.90
   5   6 -11    9.40    1.30
  -5   6  11    7.10    1.50
   5  -6 -11    9.40    1.50
  -5  -6  11   11.60    1.90
  -5   6  10    1.50    0.90
   5   6 -10    3.20    1.00
  -5   6  10    0.40    1.00
   5   6 -10    0.40    0.70
   5  -6 -10    2.20    0.90
   5   6  -9    9.90    1.40
  -5   6   9   11.20    1.70
  -5   6   9   10.70    1.70
  -5  -6   9   11.10    1.80
   5  -6  -9   11.30    1.70
   5   6  -8  107.19    9.70
  -5   6   8  109.09    9.80
  -5  -6   8  101.79    9.90
   5  -6  -8  100.99    9.70
   5   6  -7   38.60    3.50
  -5   6   7   33.60    3.50
   5   6  -7   39.20    3.50
  -5   6   7   32.20    3.50
   5  -6  -7   27.80    3.50
  -5  -6   7   42.20    3.70
  -5   6   6  372.56   34.70
   5   6  -6  379.36   34.60
  -5   6   6  363.56   34.70
   5   6  -6  393.06   34.70
  -5   6   6  423.86   34.70
   5  -6  -6  336.17   34.60
   5  -6  -6  412.36   34.70
   5   6  -5    5.00    0.90
  -5   6   5    5.60    0.90
   5   6  -5    6.20    0.80
  -5   6   5    5.60    0.90
  -5  -6   5    5.90    1.00
   5  -6  -5    7.60    1.00
  -5  -6   5    6.70    1.00
   5  -6  -5    4.90    0.90
  -5   6   4 1322.37  113.49
   5   6  -4 1385.16  113.59
   5   6  -4 1117.49  113.49
  -5  -6   4 1097.99  113.49
   5  -6  -4 1333.27  113.49
  -5  -6   4 1308.07  113.59
  -5   6   3   62.49    5.70
  -5   6   3   68.59    5.80
   5  -6  -3   67.19    5.80
  -5  -6   3   56.39    5.80
  -5  -6   3   66.09    5.80
   5  -6  -3   49.10    5.70
  -5   6   2 1259.57  110.19
  -5   6   2 1139.59  110.09
  -5   6   2 1308.97  110.09
  -5  -6   2 1163.38  110.19
   5  -6  -2 1244.98  110.09
   5   6  -1   30.60    3.30
   5   6  -1   42.60    3.40
  -5   6   1   36.10    3.40
  -5   6   1   39.60    3.40
   5  -6  -1   29.80    3.40
  -5  -6   1   37.30    3.50
   5  -6  -1   39.60    3.40
   5  -6  -1   28.80    3.40
   5   6   0  849.72   71.19
   5   6   0  631.74   71.19
   5  -6   0  826.42   71.09
   5  -6   0  831.22   71.19
  -5  -6   0  810.42   71.19
   5   6   1   45.90    4.80
   5   6   1   45.10    4.90
  -5   6  -1   51.89    4.80
  -5   6  -1   44.90    4.80
   5  -6   1   55.79    4.90
   5  -6   1   53.29    4.70
   5  -6   1   57.99    5.00
  -5  -6  -1   50.79    4.80
   5  -6   1   53.99    4.90
   5   6   2  899.31   81.09
  -5   6  -2  839.02   80.99
  -5   6  -2  906.31   80.89
   5  -6   2  916.41   81.09
  -5  -6  -2  933.61   81.09
   5   6   3   11.00    1.70
   5   6   3   11.80    1.50
  -5   6  -3   16.90    1.70
  -5   6  -3   14.30    1.50
   5   6   3   10.10    1.60
   5  -6   3   15.70    1.40
  -5  -6  -3   15.70    1.70
   5  -6   3   13.40    1.70
   5   6   4  110.59   10.50
  -5   6  -4  113.29   10.70
  -5   6  -4  112.99   10.40
   5   6   4  117.29   10.70
   5  -6   4  129.09   10.40
  -5  -6  -4  113.89   10.60
   5  -6   4  102.19   10.60
  -5   6  -5    8.20    1.30
   5   6   5   12.10    1.40
   5  -6   5    6.60    1.30
  -5  -6  -5    9.80    1.40
   5   6   6   12.50    1.60
  -5   6  -6   13.10    1.90
  -5  -6  -6    9.30    1.40
   5  -6   6   10.30    1.60
   5   6   7   16.60    2.00
  -5   6  -7   11.40    1.80
   5  -6   7   14.20    2.10
  -5  -6  -7   11.10    1.60
   5   6   8    5.00    1.20
  -5   6  -8    5.00    1.40
  -5  -6  -8    2.90    1.00
   5  -6   8    2.60    1.20
   5   6   9    0.00    1.20
  -5   6  -9    0.30    1.40
   5  -6   9    1.40    1.20
   5   6  10   74.59    7.00
  -5   6 -10   66.59    7.20
   5  -6  10   61.49    7.00
  -5   6 -11   46.80    5.40
   5   6  11   39.50    5.00
   5  -6  11   33.40    4.80
  -5   7  13    0.90    2.30
   5   7 -13    4.60    1.80
  -5   7  13    3.50    2.00
  -5  -7  13    5.10    1.90
   5  -7 -13    0.80    1.50
  -5   7  12   79.19    8.70
  -5   7  12   86.99    8.40
   5   7 -12   82.79    8.40
  -5  -7  12   88.79    8.60
   5  -7 -12   84.89    8.20
  -5   7  11    1.60    1.60
  -5   7  11    5.10    1.40
   5   7 -11    4.40    1.00
   5   7 -11    4.50    1.30
  -5  -7  11    6.40    1.60
   5  -7 -11    4.50    1.30
   5   7 -10  119.89   10.50
  -5   7  10  121.29   10.70
  -5   7  10  103.39   10.80
   5  -7 -10  113.29   10.70
  -5  -7  10  110.49   10.90
  -5   7   9   -0.30    1.00
   5   7  -9    1.60    0.80
  -5   7   9    1.40    0.80
   5   7  -9   -0.20    0.60
   5  -7  -9    0.00    0.70
  -5  -7   9    1.90    1.00
   5   7  -8  159.08   13.50
   5   7  -8  165.78   13.50
  -5   7   8  129.29   13.50
   5  -7  -8  142.49   13.50
  -5  -7   8  135.09   13.70
  -5   7   7    8.80    1.30
   5   7  -7   10.60    1.30
   5   7  -7    8.40    1.20
  -5   7   7    8.50    1.30
   5  -7  -7    6.50    1.20
  -5  -7   7    7.70    1.40
   5   7  -6   87.19    8.00
   5   7  -6   91.69    8.20
  -5  -7   6   93.99    8.30
   5  -7  -6   76.39    8.10
   5   7  -5    0.40    0.40
   5   7  -5   -0.20    0.50
  -5   7   5    0.30    0.40
  -5   7   5    0.40    0.50
  -5  -7   5    0.60    0.80
  -5  -7   5    0.50    0.60
   5  -7  -5    0.30    0.40
   5  -7  -5    0.00    0.50
  -5   7   4  280.47   25.20
   5   7  -4  283.17   25.20
   5  -7  -4  263.77   25.30
  -5  -7   4  234.18   25.30
  -5  -7   4  313.37   25.40
   5  -7  -4  298.27   25.30
   5   7  -3    1.00    0.50
   5   7  -3    0.50    0.30
  -5   7   3    0.40    0.40
  -5   7   3    0.60    0.40
   5  -7  -3   -0.20    0.40
   5  -7  -3    1.10    0.60
  -5  -7   3    0.60    0.40
   5  -7  -3    0.60    0.40
  -5  -7   3    1.40    0.60
   5   7  -2    0.50    0.40
  -5   7   2    0.40    0.40
  -5   7   2    0.60    0.40
   5   7  -2    0.70    0.40
  -5  -7   2    0.70    0.40
   5  -7  -2    0.90    0.60
   5  -7  -2    1.10    0.50
   5  -7  -2    0.70    0.40
  -5  -7   2   -0.10    0.60
   5   7  -1   73.19    8.30
   5   7  -1   99.09    8.40
  -5   7   1   95.69    8.30
   5  -7  -1   94.99    8.30
  -5   7   0   75.69    7.00
  -5   7   0   81.29    7.00
   5   7   0   72.09    7.00
  -5  -7   0   69.79    7.10
   5  -7   0   81.99    7.10
   5  -7   0   73.59    7.00
   5   7   1   83.49    8.50
  -5   7  -1  105.39    8.50
  -5   7  -1   77.39    8.40
   5   7   1   78.89    8.30
  -5  -7  -1  108.59    8.50
   5  -7   1   96.89    8.30
  -5   7  -2   88.79    8.80
   5   7   2  113.29    8.90
  -5   7  -2  106.29    8.80
   5   7   2   87.29    8.70
   5  -7   2   90.99    8.80
  -5  -7  -2   84.19    8.80
  -5   7  -3    0.00    0.50
   5   7   3    0.40    0.50
  -5   7  -3    0.90    0.50
   5   7   3    0.30    0.40
   5   7   3    0.10    0.50
  -5  -7  -3    0.40    0.60
   5  -7   3    0.20    0.60
   5  -7   3    0.70    0.30
   5   7   4  212.08   21.40
   5   7   4  252.27   21.60
  -5   7  -4  241.18   21.50
  -5   7  -4  267.47   21.30
   5  -7   4  222.48   21.50
  -5  -7  -4  217.78   21.50
  -5   7  -5    5.50    1.10
   5   7   5    6.90    1.10
   5   7   5    7.60    1.40
  -5  -7  -5    7.60    1.20
   5   7   6  489.75   43.50
   5   7   6  459.65   43.70
   5  -7   6  489.35   43.60
   5   7   7    2.60    1.50
   5   7   7    3.90    1.10
  -5   7  -7    3.20    1.20
  -5  -7  -7    1.80    1.00
   5   7   8  157.58   14.00
   5   7   8  149.29   14.40
  -5   7  -8  148.39   14.10
   5  -7   8  141.19   14.10
  -5  -7  -8  151.08   13.90
  -5   7  -9    1.90    1.50
   5   7   9   -0.10    1.70
   5   7   9    1.60    1.40
   5  -7   9    2.50    1.40
  -5  -7  -9    2.40    1.30
  -5   7 -10   87.99    8.20
   5   7  10   78.69    8.80
   5  -7  10   70.89    8.00
  -5   8  13    7.00    2.50
   5   8 -13    4.70    2.10
  -5  -8  13    4.40    2.10
   5  -8 -13    5.30    1.90
  -5   8  12    0.80    1.80
   5   8 -12    2.40    1.60
  -5   8  12    1.80    1.60
  -5  -8  12    2.50    1.70
   5  -8 -12    2.00    1.40
  -5   8  11   24.50    3.80
  -5   8  11   25.60    3.40
   5   8 -11   29.10    3.40
   5   8 -11   26.40    3.00
  -5  -8  11   26.90    3.60
   5  -8 -11   27.40    3.30
  -5   8  10    1.50    1.30
   5   8 -10    3.20    0.90
   5   8 -10    0.80    1.00
  -5   8  10    2.90    1.20
   5  -8 -10    1.90    1.00
  -5  -8  10    3.00    1.20
   5   8  -9   34.80    3.90
  -5   8   9   38.80    4.30
   5   8  -9   47.60    4.10
  -5   8   9   44.00    4.10
   5  -8  -9   37.10    4.10
  -5  -8   9   36.00    4.30
  -5   8   8   68.99    7.40
   5   8  -8   83.49    7.30
   5   8  -8   77.99    7.30
   5  -8  -8   78.69    7.40
   5   8  -7   35.10    3.30
   5   8  -7   28.10    3.20
  -5   8   7   36.50    3.30
  -5   8   7   30.70    3.40
   5  -8  -7   31.80    3.30
  -5   8   6  416.46   36.00
   5   8  -6  368.46   36.00
  -5   8   6  425.96   36.10
   5  -8  -6  428.46   36.10
  -5  -8   6  350.86   36.10
   5   8  -5   13.80    1.60
  -5   8   5   15.60    1.70
   5   8  -5   15.20    1.80
  -5   8   5   14.10    1.80
  -5  -8   5   15.80    1.90
   5  -8  -5   17.40    1.80
   5  -8  -5   11.40    1.70
  -5   8   4  243.28   23.70
  -5   8   4  264.07   23.80
   5   8  -4  252.37   23.70
   5  -8  -4  268.07   23.80
  -5  -8   4  261.57   23.80
  -5  -8   4  284.07   23.90
   5   8  -3   11.80    1.50
   5   8  -3   11.60    1.30
  -5   8   3   10.70    1.30
  -5   8   3   14.40    1.50
  -5  -8   3   15.20    1.80
   5  -8  -3    8.20    1.40
   5  -8  -3   12.10    1.40
  -5  -8   3   12.20    1.50
   5   8  -2  609.64   57.99
  -5   8   2  682.73   58.09
  -5  -8   2  678.83   58.19
   5  -8  -2  644.34   58.09
  -5  -8   2  663.33   58.09
  -5  -8   2  582.34   58.09
  -5   8   1    4.10    0.80
   5   8  -1    5.50    0.80
   5   8  -1    5.90    0.90
  -5  -8   1    6.30    1.00
   5  -8  -1    5.40    0.90
   5  -8  -1    5.60    0.80
  -5   8   0 1004.80   89.29
   5   8   0  913.41   89.29
   5  -8   0 1052.59   89.29
  -5  -8   0  983.80   89.29
   5  -8   0 1018.40   89.29
   5  -8   0  971.30   89.19
  -5   8  -1   10.90    1.40
   5   8   1    7.40    1.10
  -5   8  -1    8.70    1.30
   5   8   1   10.70    1.40
  -5  -8  -1   10.20    1.10
   5  -8   1    8.30    1.30
  -5  -8  -1   11.10    1.40
   5  -8   1    9.20    1.10
   5   8   2  358.86   27.30
  -5   8  -2  268.37   27.00
   5  -8   2  296.87   27.20
   5  -8   2  274.77   27.00
   5   8   3  159.18   13.60
  -5   8  -3  161.78   13.40
   5   8   3  140.19   13.30
   5  -8   3  132.69   13.50
  -5  -8  -3  137.69   13.50
   5   8   4   60.59    5.10
  -5   8  -4   49.90    5.20
   5   8   4   63.89    5.40
  -5   8  -4   52.19    5.00
   5  -8   4   44.60    5.20
  -5  -8  -4   47.00    5.20
   5   8   5   32.10    3.60
  -5   8  -5   30.50    3.40
   5  -8   5   32.40    3.40
  -5  -8  -5   31.30    3.40
   5   8   6    3.70    1.30
  -5   8  -6    2.50    1.00
   5   8   6    2.80    0.90
  -5  -8  -6    0.80    0.90
   5  -8   6    3.10    1.10
  -5   8  -7   12.60    2.20
   5   8   7   16.50    2.30
   5   8   7   20.00    2.90
   5  -8   7   19.70    2.50
  -5  -8  -7   14.80    2.10
   5   8   8    1.00    1.20
   5   8   8    1.90    1.40
  -5   8  -8    2.00    1.20
   5  -8   8    0.10    1.20
  -5  -8  -8   -0.40    1.10
   5   8   9   28.30    4.30
  -5   8  -9   25.50    3.70
   5  -8   9   21.80    3.70
  -5  -8  -9   32.10    3.50
  -5   8 -10   32.00    4.50
   5   8  10   36.90    5.20
   5  -8  10   27.70    4.40
  -5   9  12  123.49   12.80
   5   9 -12  124.99   12.60
  -5  -9  12  151.68   13.00
   5  -9 -12  129.09   12.60
   5   9 -11   -1.50    1.30
  -5   9  11    1.20    1.60
   5  -9 -11    2.40    1.20
  -5  -9  11    0.60    1.50
   5   9 -10  270.47   24.40
   5   9 -10  283.27   24.60
  -5   9  10  258.87   24.70
  -5  -9  10  256.27   24.80
   5  -9 -10  270.77   24.60
   5   9  -9    4.50    1.10
   5   9  -9    7.10    1.20
  -5   9   9    7.00    1.30
  -5   9   9    3.50    1.30
  -5   9   8  110.49   10.20
   5   9  -8   99.09   10.10
   5   9  -8  109.29   10.20
  -5  -9   8   96.29   10.40
   5  -9  -8  132.29   10.30
  -5   9   7    1.10    0.80
   5   9  -7    1.60    0.70
  -5   9   7    1.30    0.70
   5   9  -7    0.80    0.60
  -5  -9   7    2.60    1.00
   5  -9  -7    2.50    0.80
  -5   9   6  154.78   14.60
  -5   9   6  176.08   14.80
   5   9  -6  160.68   14.60
   5  -9  -6  175.68   14.70
  -5  -9   6  132.99   14.70
   5   9  -5    6.00    0.80
  -5   9   5    4.10    0.90
  -5   9   5    3.60    0.70
  -5  -9   5    5.50    1.00
   5  -9  -5    3.20    0.80
   5  -9  -5    4.60    0.90
  -5   9   4   67.59    6.30
  -5   9   4   72.39    6.50
   5   9  -4   67.59    6.30
  -5  -9   4   69.29    6.40
   5  -9  -4   60.29    6.30
   5  -9  -4   71.39    6.40
   5   9  -3  106.39   10.00
  -5   9   3  105.59   10.00
   5   9  -3  120.59   10.00
  -5   9   3  120.39    9.90
   5  -9  -3   90.69    9.90
   5  -9  -3  124.69   10.00
  -5  -9   3   90.69   10.00
  -5   9   2   -0.20    0.50
   5   9  -2    0.90    0.50
   5   9  -2    0.40    0.50
   5  -9  -2    0.90    0.50
  -5  -9   2    1.20    0.50
  -5  -9   2   -0.20    0.50
   5  -9  -2    1.60    0.60
  -5   9   1   45.70    4.80
   5   9  -1   45.50    4.80
   5   9  -1   48.20    4.80
  -5  -9   1   60.89    5.00
   5  -9  -1   58.79    4.80
   5  -9  -1   47.30    4.80
   5   9   0  115.29   12.30
   5   9   0  137.69   12.40
   5  -9   0  128.49   12.30
   5  -9   0  151.58   12.50
  -5  -9   0  136.39   12.30
   5  -9   0  138.39   12.40
  -5  -9   0  139.79   12.50
  -5   9  -1   34.30    3.00
   5   9   1   26.60    2.70
   5   9   1   28.50    3.00
   5  -9   1   24.90    2.90
   5  -9   1   31.50    2.80
  -5  -9  -1   24.40    2.90
   5   9   2  319.27   27.70
  -5   9  -2  275.87   27.70
   5  -9   2  336.07   27.60
  -5  -9  -2  285.77   27.70
   5   9   3  129.89   11.50
  -5   9  -3  107.89   11.60
   5   9   3  136.79   11.80
  -5  -9  -3  107.29   11.70
   5  -9   3  146.09   11.50
   5   9   4  454.55   39.50
   5   9   4  480.25   39.30
  -5   9  -4  432.86   39.40
  -5  -9  -4  417.76   39.40
   5  -9   4  385.96   39.40
   5   9   5   17.10    1.90
   5   9   5   16.70    2.30
   5  -9   5   13.60    2.10
  -5  -9  -5   15.00    2.10
   5  -9   5   13.30    1.50
   5   9   6  145.29   14.50
   5   9   6  172.68   14.20
  -5   9  -6  152.78   14.40
  -5  -9  -6  152.78   14.40
   5  -9   6  145.99   14.40
   5   9   7    0.40    1.30
   5   9   7    1.20    1.10
  -5   9  -7    0.40    1.00
  -5  -9  -7   -2.80    1.00
   5  -9   7    0.30    1.10
   5   9   8  121.69   12.70
  -5   9  -8  134.69   12.50
  -5  -9  -8  134.49   12.30
   5  -9   8  130.79   12.50
   5   9   9    0.80    2.00
  -5   9  -9    0.30    1.40
  -5  -9  -9    1.40    1.50
   5  -9   9    0.70    1.50
  -5   9 -10   90.39    9.00
   5   9  10   79.99    9.50
   5  -9  10   89.19    9.00
   5  10 -12   15.00    2.70
  -5  10  12   17.20    3.10
   5 -10 -12   19.80    2.80
  -5 -10  12   17.10    2.90
   5  10 -11   15.20    2.40
  -5  10  11   13.00    2.50
  -5 -10  11   13.50    2.50
   5 -10 -11   16.70    2.40
   5  10 -10   24.60    3.20
   5  10 -10   22.20    2.90
  -5  10  10   22.70    3.50
   5 -10 -10   26.80    3.20
  -5 -10  10   24.70    3.40
   5  10  -9    7.40    1.30
  -5  10   9    9.50    1.40
  -5  10   9    5.20    1.60
   5  10  -9    6.80    1.30
  -5 -10   9    7.90    1.70
   5 -10  -9    7.30    1.40
  -5  10   8   73.09    7.40
   5  10  -8   77.29    7.30
  -5  10   8   78.39    7.10
   5 -10  -8   74.99    7.30
  -5 -10   8   74.99    7.50
  -5  10   7   30.80    3.50
   5  10  -7   36.00    3.50
   5  10  -7   32.50    3.40
  -5  10   7   33.20    3.30
  -5 -10   7   30.90    3.70
   5 -10  -7   32.90    3.50
   5  10  -6   68.99    6.60
  -5  10   6   68.39    6.40
  -5  10   6   64.69    6.60
   5  10  -6   69.69    6.50
  -5 -10   6   71.49    6.70
   5 -10  -6   69.39    6.60
   5  10  -5    4.30    0.80
  -5  10   5    2.90    0.80
   5 -10  -5    3.30    0.80
   5 -10  -5    3.90    0.80
  -5 -10   5    3.30    0.90
  -5  10   4  364.96   37.60
   5  10  -4  480.35   37.60
   5 -10  -4  414.76   37.60
   5 -10  -4  441.46   37.50
  -5 -10   4  374.26   37.60
   5  10  -3    0.10    0.50
   5  10  -3    1.30    0.80
  -5  10   3    0.90    0.70
   5 -10  -3    0.40    0.50
  -5 -10   3    2.80    0.70
  -5 -10   3    1.40    0.60
   5 -10  -3    1.60    0.60
   5  10  -2  389.46   35.80
  -5  10   2  397.26   35.90
   5 -10  -2  390.26   35.80
  -5 -10   2  427.56   35.80
   5 -10  -2  373.26   35.70
   5  10  -1    9.20    1.20
   5  10  -1    6.60    0.90
  -5  10   1    5.20    1.00
   5 -10  -1    7.30    1.10
   5 -10  -1    7.50    1.10
   5 -10  -1    7.10    1.10
  -5 -10   1    5.30    1.10
  -5  10   0  216.88   21.00
   5  10   0  242.18   20.90
  -5 -10   0  254.97   21.10
  -5 -10   0  222.88   20.90
   5 -10   0  216.38   21.00
   5  10   1    0.40    0.50
   5  10   1    1.50    0.70
  -5  10  -1   -0.50    0.60
   5 -10   1    0.40    0.40
  -5 -10  -1    0.00    0.70
   5 -10   1    0.00    0.60
   5  10   2  276.47   25.90
   5  10   2  317.17   26.20
  -5 -10  -2  261.47   26.20
   5 -10   2  292.77   26.10
  -5  10  -3    2.20    0.80
   5  10   3    3.20    0.60
   5  10   3    1.30    0.80
  -5 -10  -3    2.10    0.90
   5 -10   3    2.80    0.60
   5 -10   3    2.30    0.80
  -5  10  -4   37.40    3.80
   5  10   4   37.10    4.00
   5  10   4   36.90    3.60
  -5 -10  -4   38.50    3.90
   5 -10   4   34.50    3.50
   5 -10   4   36.00    3.80
   5  10   5   18.00    2.60
  -5 -10  -5   16.30    2.40
   5 -10   5   16.10    2.40
  -5  10  -6    5.00    1.20
   5  10   6    4.60    1.50
   5 -10   6    4.80    1.30
  -5 -10  -6    2.10    1.20
   5  10   7   22.40    3.30
  -5  10  -7   23.40    3.20
   5 -10   7   22.50    3.20
  -5  10  -8    1.60    1.50
   5  10   8    2.70    1.90
  -5 -10  -8   -2.00    1.40
   5 -10   8   -0.10    1.40
  -5  10  -9   14.50    2.70
   5  10   9   15.70    3.20
  -5 -10  -9   25.70    3.50
   5 -10   9   26.20    3.70
  -5  11  11    2.20    2.00
   5  11 -11    1.60    1.70
   5 -11 -11    3.30    1.60
  -5 -11  11    2.90    1.90
   5  11 -10   30.70    3.90
  -5  11  10   32.70    4.20
   5  11 -10   37.50    3.60
  -5 -11  10   30.50    4.20
   5 -11 -10   26.50    3.80
   5  11  -9    4.20    1.30
  -5  11   9    2.20    1.40
   5  11  -9    4.20    1.30
   5 -11  -9    3.10    1.20
  -5 -11   9    3.30    1.60
   5  11  -8  110.89    9.40
  -5  11   8   93.69    9.50
   5  11  -8   93.09    9.40
  -5 -11   8  102.19    9.70
   5 -11  -8   97.99    9.50
   5  11  -7   10.60    1.70
   5  11  -7   16.90    1.90
  -5  11   7   10.90    1.80
   5 -11  -7   12.50    1.80
  -5 -11   7   12.80    2.00
  -5  11   6   58.59    5.90
   5 -11  -6   61.89    5.90
  -5 -11   6   60.29    6.00
  -5  11   5   43.60    4.70
   5  11  -5   50.69    4.60
  -5 -11   5   45.80    4.70
  -5  11   4    5.10    1.00
   5  11  -4    4.10    0.90
  -5 -11   4    6.10    1.10
   5 -11  -4    3.80    0.90
  -5  11   3  130.79   13.00
   5  11  -3  143.69   12.90
  -5 -11   3  144.19   13.00
   5 -11  -3  135.79   12.80
  -5 -11   3  148.49   12.90
   5  11  -2    4.80    0.90
  -5  11   2    3.70    1.00
   5  11  -2    3.40    0.90
   5 -11  -2    7.00    1.00
   5 -11  -2    3.90    0.80
  -5 -11   2    4.50    1.00
   5 -11  -2    5.10    0.90
  -5 -11   2    4.10    0.80
   5  11  -1   98.49    8.20
  -5  11   1   75.99    8.10
  -5 -11   1   73.19    8.20
   5 -11  -1   88.39    8.10
   5 -11  -1  103.49    8.10
   5 -11  -1   79.29    8.00
  -5  11   0   36.00    4.30
   5  11   0   44.60    4.40
   5  11   0   49.20    4.20
   5 -11   0   48.50    4.30
   5 -11   0   41.40    4.20
  -5 -11   0   39.00    4.40
  -5  11  -1   23.70    2.80
   5  11   1   25.40    2.60
   5  11   1   28.00    2.60
   5  11   1   33.50    3.00
  -5 -11  -1   23.50    3.00
   5 -11   1   25.80    2.80
   5 -11   1   25.30    2.70
   5  11   2  138.09   11.40
  -5  11  -2  113.49   11.60
   5  11   2  138.19   11.70
  -5 -11  -2  122.49   11.70
   5 -11   2  111.39   11.60
   5  11   3   18.80    2.30
  -5  11  -3   13.70    2.10
   5 -11   3   13.80    2.10
  -5 -11  -3   18.50    2.30
  -5 -11  -4  105.59    9.80
   5 -11   4  102.19    9.70
   5 -11   4  101.09    9.40
   5  11   5   45.00    5.10
  -5  11  -5   49.40    5.00
   5 -11   5   47.80    5.00
   5  11   6  107.89   11.00
  -5  11  -6  115.69   10.90
   5 -11   6  112.19   10.80
  -5 -11  -6  118.79   10.90
  -5  11  -7    1.00    1.30
   5  11   7   -1.00    1.40
  -5 -11  -7   -0.50    1.40
   5 -11   7    0.90    1.40
  -5  11  -8   57.09    6.50
   5  11   8   53.29    6.80
   5 -11   8   69.19    6.60
  -5 -11  -8   62.09    6.60
   5  11   9   11.90    2.80
  -5  11  -9    9.00    2.20
   5 -11   9    9.90    2.40
  -5 -11  -9   10.50    2.40
  -5  12  11   30.50    4.00
   5  12 -11   22.20    3.50
  -5 -12  11   36.00    4.70
   5 -12 -11   29.90    4.20
  -5  12  10   10.00    2.30
   5  12 -10   11.90    2.20
   5 -12 -10   11.70    2.00
  -5 -12  10    9.00    2.30
  -5  12   9   15.00    2.60
   5  12  -9   19.60    2.70
   5  12  -9   23.90    2.80
  -5 -12   9   17.20    2.80
   5 -12  -9   19.70    2.60
  -5  12   8   42.60    4.20
   5  12  -8   36.80    4.00
   5  12  -8   34.50    3.80
   5 -12  -8   31.20    4.00
  -5  12   7   37.60    4.40
   5  12  -7   40.10    4.20
   5  12  -7   43.70    4.40
  -5 -12   7   46.20    4.60
   5 -12  -7   41.40    4.40
  -5  12   6  146.19   14.40
  -5 -12   6  153.78   14.40
   5 -12  -6  164.08   14.40
  -5  12   5   29.40    3.50
   5  12  -5   33.60    3.30
  -5 -12   5   30.20    3.50
  -5  12   4  306.47   29.50
   5  12  -4  338.37   29.50
   5 -12  -4  331.67   29.30
  -5 -12   4  320.67   29.50
  -5  12   3    0.50    0.80
   5  12  -3    0.80    0.70
   5 -12  -3    0.70    0.70
  -5 -12   3    0.70    0.70
  -5 -12   3    0.80    0.70
  -5  12   2  549.25   42.60
  -5 -12   2  438.56   42.40
   5 -12  -2  490.05   42.50
  -5 -12   2  441.96   42.50
   5 -12  -2  429.06   42.40
   5  12  -1    0.60    0.70
  -5  12   1    0.30    0.80
   5 -12  -1    2.30    0.60
  -5 -12   1    0.70    0.80
  -5 -12   1    1.80    0.60
   5 -12  -1    1.80    0.70
   5  12   0  225.28   19.50
  -5  12   0  206.48   19.40
   5 -12   0  207.88   19.30
  -5 -12   0  208.18   19.50
  -5  12  -1   11.20    1.70
   5  12   1   13.00    1.80
  -5 -12  -1   10.00    1.60
   5 -12   1    9.50    1.30
   5 -12   1    8.90    1.40
  -5  12  -2   72.69    6.30
   5  12   2   66.39    6.30
  -5 -12  -2   57.29    6.30
   5 -12   2   72.29    6.10
   5 -12   2   53.09    6.20
   5  12   3   25.80    2.80
  -5  12  -3   18.30    2.70
   5 -12   3   21.30    2.70
   5 -12   3   20.70    2.40
  -5  12  -4  125.39   12.10
   5 -12   4  123.09   12.10
  -5 -12  -4  129.79   12.30
   5 -12   4  138.39   11.90
  -5  12  -5   25.10    3.30
   5  12   5   28.40    3.50
  -5 -12  -5   28.70    3.50
  -5  12  -6    4.40    1.50
   5  12   6    2.00    1.50
  -5 -12  -6    5.40    1.70
   5 -12   6    5.70    1.60
  -5  12  -7   24.50    3.40
   5  12   7   21.00    3.30
  -5 -12  -7   23.20    3.20
   5 -12   7   20.90    3.10
   5  12   8   27.70    4.00
  -5  12  -8   24.30    3.50
  -5 -12  -8   24.30    3.50
   5 -12   8   26.00    4.00
   5  13 -10   27.30    4.30
  -5  13  10   35.60    4.70
   5 -13 -10   38.40    4.60
  -5 -13  10   34.30    4.90
  -5  13   9   -1.00    1.40
   5  13  -9   -0.90    1.30
   5  13  -9    1.10    1.30
   5 -13  -9    1.40    1.40
  -5 -13   9    0.40    1.80
   5  13  -8   43.60    4.80
  -5  13   8   42.00    5.00
  -5 -13   8   46.30    5.30
   5 -13  -8   56.09    5.10
  -5  13   7    1.20    1.10
   5 -13  -7    1.00    1.10
  -5 -13   7    0.00    1.40
  -5  13   6   40.60    4.40
   5  13  -6   43.50    4.30
  -5 -13   6   40.30    4.50
   5 -13  -6   41.10    4.40
  -5  13   5   16.10    2.50
   5  13  -5   21.70    2.40
  -5 -13   5   19.20    2.70
   5 -13  -5   20.80    2.50
   5  13  -4    1.10    0.80
  -5  13   4    0.90    0.90
   5 -13  -4    1.20    0.80
  -5 -13   4    0.00    0.90
   5  13  -3    3.00    1.00
  -5  13   3    2.50    1.10
  -5 -13   3    3.80    1.00
  -5 -13   3    3.80    1.00
   5 -13  -3    3.10    0.90
  -5  13   2   11.20    1.80
   5  13  -2   14.00    1.90
  -5 -13   2   11.20    1.70
   5 -13  -2   16.30    1.90
  -5 -13   2   14.50    2.10
  -5  13   1   29.20    3.70
   5  13  -1   41.30    3.80
   5 -13  -1   29.70    3.50
   5 -13  -1   39.30    3.60
  -5 -13   1   40.80    4.10
  -5  13   0   24.20    3.20
   5  13   0   32.30    3.20
   5 -13   0   30.40    3.00
   5 -13   0   25.30    3.00
   5  13   1   51.29    4.80
  -5 -13  -1   39.30    4.80
   5 -13   1   52.99    4.60
   5 -13   1   41.00    4.60
  -5  13  -2   77.09    7.50
   5 -13   2   79.29    7.30
  -5 -13  -2   74.99    7.50
   5 -13   2   75.39    7.40
  -5  13  -3   17.60    2.80
   5  13   3   27.60    3.10
  -5 -13  -3   21.00    3.10
   5 -13   3   22.40    2.60
   5 -13   3   26.50    2.90
  -5  13  -4  144.49   14.20
   5  13   4  136.99   14.20
   5 -13   4  155.48   14.20
   5 -13   4  165.98   13.90
  -5 -13  -4  152.38   14.30
   5  13   5   -1.50    1.20
  -5  13  -5   -0.20    1.10
  -5 -13  -5   -1.20    1.30
   5 -13   5   -0.50    1.20
   5  13   6   80.39    8.80
  -5  13  -6   89.29    8.70
   5 -13   6   90.09    8.80
  -5 -13  -6   91.29    8.90
  -5  13  -7    7.50    1.90
   5  13   7    7.40    2.00
  -5 -13  -7    5.40    2.00
   5 -13   7    8.00    2.10
   5  14  -9   25.40    3.80
  -5  14   9   25.80    4.00
  -5 -14   9   27.30    4.40
   5 -14  -9   33.70    4.00
   5  14  -8   38.00    4.50
   5  14  -8   34.00    4.30
  -5  14   8   40.60    4.50
  -5 -14   8   48.10    4.90
   5 -14  -8   35.20    4.40
   5  14  -7    3.30    1.30
  -5  14   7    6.50    1.60
   5  14  -7    5.10    1.60
   5 -14  -7    7.80    1.60
  -5 -14   7    8.30    1.90
   5  14  -6   16.20    2.40
  -5  14   6   13.40    2.20
  -5 -14   6   17.60    2.40
   5 -14  -6   13.90    2.10
  -5  14   5   25.00    3.40
   5 -14  -5   31.40    3.40
  -5 -14   5   32.50    3.60
  -5  14   4  112.69   11.50
  -5 -14   4  132.49   11.40
   5 -14  -4  118.79   11.40
  -5  14   3   23.00    3.30
   5  14  -3   31.40    3.20
   5 -14  -3   25.20    3.10
  -5 -14   3   35.40    3.40
   5  14  -2  113.09   11.70
  -5  14   2  122.49   11.80
   5 -14  -2  140.49   11.70
  -5  14   1   -1.40    0.90
  -5 -14   1   -2.50    0.90
   5 -14  -1    0.00    0.70
  -5  14   0   56.89    6.10
   5  14   0   52.49    6.00
   5 -14   0   69.39    6.00
   5 -14   0   70.99    6.00
  -5 -14   0   53.49    6.10
   5  14   1    5.80    1.30
  -5  14  -1    1.50    1.10
   5 -14   1    3.90    1.20
  -5 -14  -1    2.20    1.20
   5 -14   1    4.00    1.00
   5  14   2  143.09   15.10
  -5  14  -2  153.88   15.10
   5 -14   2  176.78   14.90
  -5 -14  -2  167.78   15.20
   5 -14   2  168.08   15.00
  -5  14  -3    9.10    1.80
   5  14   3    8.80    1.80
  -5 -14  -3   10.00    2.00
   5 -14   3   12.70    1.60
   5 -14   3   13.80    2.00
  -5  14  -4   16.80    2.40
   5  14   4   14.30    2.30
   5 -14   4   18.90    2.60
  -5 -14  -4   16.80    2.60
  -5  14  -5   29.70    3.80
   5  14   5   29.70    4.00
  -5 -14  -5   33.10    4.20
   5 -14   5   28.60    4.00
   5  14   6    5.50    1.90
  -5  14  -6    7.60    1.90
   5 -14   6    6.10    2.00
  -5 -14  -6    8.40    2.30
  -5  15   8   28.10    3.80
   5  15  -8   22.70    3.00
   5  15  -8   16.70    2.80
   5 -15  -8   30.20    3.70
  -5  15   7   14.70    2.40
   5  15  -7   14.60    2.10
   5  15  -7   12.00    2.40
   5 -15  -7   14.60    2.30
  -5  15   6    2.90    1.50
   5  15  -6    3.80    1.40
   5 -15  -6    4.10    1.30
   5  15  -5    4.10    1.20
  -5  15   5    2.60    1.30
   5 -15  -5    2.30    1.20
   5  15  -4    9.40    1.70
  -5  15   4   10.10    1.80
   5 -15  -4   10.40    1.70
   5  15  -3   36.90    3.50
  -5  15   3   28.40    3.50
   5 -15  -3   26.20    3.40
  -5 -15   3   25.10    3.40
   5  15  -2    8.90    1.70
  -5  15   2    8.50    1.70
   5 -15  -2   12.00    1.70
  -5 -15   2    9.20    1.70
  -5  15   1   36.30    4.40
   5  15  -1   50.19    4.40
   5 -15  -1   46.10    4.30
  -5 -15   1   30.30    4.40
  -5  15   0   19.10    3.00
   5  15   0   22.60    2.90
  -5 -15   0   18.60    2.90
   5 -15   0   22.70    2.70
   5  15   1   53.99    5.70
  -5  15  -1   55.09    5.70
  -5 -15  -1   57.79    5.80
   5  15   2   56.29    5.50
  -5  15  -2   49.00    5.50
   5 -15   2   53.79    5.30
  -5 -15  -2   49.60    5.60
   5  15   3    7.50    1.70
  -5  15  -3    6.60    1.80
  -5 -15  -3    7.20    2.10
   5 -15   3    9.10    1.90
   5 -15   3   10.10    1.60
  -5  15  -4  126.29   12.10
   5  15   4  111.59   12.00
   5 -15   4  139.59   12.10
  -5 -15  -4  128.09   12.30
   5  15   5    0.50    1.70
  -5  15  -5    0.20    1.50
  -5 -15  -5   -1.50    1.70
   5 -15   5    2.20    1.80
  -5  16   7    8.20    2.10
   5  16  -7    5.80    2.00
   5  16  -7    2.70    1.50
   5 -16  -7    6.30    1.90
   5  16  -6   81.09    7.90
   5 -16  -6   77.99    8.00
   5  16  -5   23.10    3.10
  -5  16   5   25.10    3.40
   5 -16  -5   20.40    3.20
  -5  16   4   39.20    4.70
   5  16  -4   43.20    4.50
   5 -16  -4   40.10    4.60
  -5  16   3   21.00    3.00
   5  16  -3   17.80    2.70
   5 -16  -3   15.60    2.30
  -5 -16   3   19.10    2.80
  -5  16   2   77.99    7.70
   5  16  -2   77.19    7.60
  -5 -16   2   80.39    7.80
   5 -16  -2   74.69    7.60
  -5  16   1    0.00    1.30
   5  16  -1    0.80    1.20
  -5 -16   1   -0.20    1.30
   5 -16  -1    1.10    1.10
   5  16   0  107.89   10.90
   5 -16   0  117.19   10.90
  -5 -16   0  119.79   11.10
  -5  16  -1    0.20    1.30
   5  16   1   -0.70    1.20
  -5 -16  -1   -1.30    1.30
   5 -16   1    0.80    1.20
   5  16   2   19.80    3.00
  -5  16  -2   16.70    2.70
   5 -16   2   22.50    2.90
  -5 -16  -2   20.30    2.90
   5  16   3    0.40    1.40
  -5  16  -3    0.00    1.30
  -5 -16  -3    1.70    1.60
  -5  16  -4    6.70    1.90
   5  16   4    4.90    1.80
  -5 -16  -4    9.40    2.40
  -5  17   5    8.20    2.00
   5  17  -5    4.60    1.70
   5 -17  -5    8.00    1.90
  -5  17   4    0.90    1.50
   5  17  -4    1.70    1.40
   5 -17  -4    0.40    1.40
   5  17  -3   19.30    3.10
  -5 -17   3   26.50    3.50
   5 -17  -3   22.50    3.20
   5  17  -2    0.70    1.30
  -5  17   2    0.30    1.40
  -5 -17   2   -1.10    1.40
   5 -17  -2   -0.90    1.30
   5  17  -1   11.00    2.00
  -5  17   1   17.00    2.30
   5 -17  -1   11.90    2.10
  -5 -17   1    7.30    2.00
  -5  17   0   24.90    3.30
   5  17   0   19.00    2.80
  -5 -17   0   11.30    2.40
   5 -17   0   16.40    2.30
   5  17   1    7.60    1.90
   5 -17   1    8.80    1.90
  -5 -17  -1   12.90    2.20
   5  17   2   17.20    3.00
  -5  17  -2   30.90    3.90
   5 -17   2   24.70    3.60
  -5 -17  -2   32.70    4.00
  -6   0  14   29.60    4.20
  -6   0  13   -0.70    1.30
   6   0 -13    0.40    1.10
   6   0 -12   93.39    9.50
  -6   0  12  113.59   10.00
   6   0 -11    0.70    0.70
   6   0 -10  307.87   30.20
  -6   0  10  360.26   30.50
  -6   0   9    0.90    0.60
   6   0  -9    0.40    0.50
  -6   0   9    0.10    0.70
  -6   0   8  580.84   52.49
  -6   0   8  578.64   52.29
   6   0  -7    0.40    0.50
  -6   0   7    0.40    0.30
  -6   0   7    0.20    0.50
   6   0  -6  489.15   47.70
  -6   0   6  568.84   47.90
   6   0  -5   -0.20    0.30
  -6   0   5   -0.10    0.40
   6   0  -4  484.95   44.10
  -6   0   4  499.45   44.10
  -6   0   4  501.55   44.10
   6   0  -4  465.95   44.10
  -6   0   3    0.40    0.30
  -6   0   3    0.50    0.40
   6   0  -3   -0.10    0.30
   6   0  -3    0.00    0.30
  -6   0   2  346.37   30.00
   6   0  -2  316.47   30.00
   6   0  -1    0.50    0.40
  -6   0   1    0.10    0.40
   6   0  -1   -0.10    0.20
  -6   0   1    0.00    0.30
  -6   0   1   -0.10    0.20
   6   0  -1    0.20    0.30
  -6   0   0    0.80    0.30
   6   0   0    0.20    0.40
   6   0   0    1.10    0.30
  -6   0   0    0.30    0.20
   6   0   0    0.50    0.30
   6   0   1    0.60    0.50
   6   0   1    0.40    0.40
   6   0   1    0.20    0.30
  -6   0  -1   -0.30    0.30
   6   0   2  453.25   42.20
  -6   0  -2  483.55   42.30
   6   0   3   -0.50    0.30
   6   0   3   -0.10    0.40
  -6   0  -3    0.00    0.50
   6   0   3    0.70    0.30
   6   0   4  225.68   20.50
   6   0   4  213.28   20.30
  -6   0  -4  235.88   20.50
   6   0   5    0.10    0.30
  -6   0  -5   -0.30    0.60
   6   0   5   -0.10    0.50
   6   0   5    0.20    0.30
   6   0   6  396.16   34.90
  -6   0  -6  371.96   35.00
  -6   0  -7    0.10    0.90
   6   0   7   -0.30    0.60
  -6   0  -8  238.68   22.10
   6   0   9    0.40    1.20
  -6   0  -9   -0.20    1.40
  -6   0 -10  219.88   19.70
   6   0  10  198.28   19.40
   6   0  11   -1.70    1.50
  -6   0 -11    1.90    2.20
  -6   1  14   16.10    2.70
  -6  -1  14   14.60    2.60
   6   1 -13    2.40    1.10
  -6   1  13    2.70    1.40
  -6  -1  13    0.40    1.50
   6  -1 -13    2.40    1.10
   6   1 -12   17.70    2.20
   6   1 -12   14.00    2.10
  -6   1  12   17.60    2.60
   6  -1 -12   19.20    2.20
  -6  -1  12   13.40    2.40
   6   1 -11    3.80    1.10
   6   1 -11    4.50    0.90
  -6   1  11    4.40    1.20
   6  -1 -11    3.10    0.80
   6   1 -10    1.80    0.80
  -6   1  10    3.40    1.10
   6   1 -10    1.70    0.70
  -6  -1  10    1.70    1.00
   6  -1 -10    1.50    0.70
   6   1  -9    1.00    0.60
   6   1  -9    0.60    0.60
  -6   1   9   -0.10    0.60
  -6   1   9   -0.80    0.70
  -6  -1   9    1.10    0.60
   6  -1  -9    0.80    0.60
  -6  -1   9    0.00    0.80
  -6   1   8   98.79    8.70
  -6   1   8   81.19    8.40
   6   1  -8  101.99    8.50
   6  -1  -8   89.79    8.50
  -6  -1   8   89.89    8.40
  -6  -1   8   90.79    8.70
  -6   1   7    0.30    0.50
  -6   1   7   -0.50    0.30
   6   1  -7    0.00    0.30
   6   1  -7   -0.30    0.40
  -6   1   7   -0.20    0.40
   6  -1  -7    0.40    0.40
  -6  -1   7    0.50    0.60
  -6  -1   7    0.40    0.30
  -6   1   6  461.75   41.80
  -6   1   6  439.66   41.60
   6   1  -6  436.26   41.60
  -6  -1   6  477.15   41.80
   6  -1  -6  496.45   41.70
  -6   1   5    1.30    0.50
  -6   1   5    1.90    0.30
   6   1  -5    2.00    0.60
  -6   1   5    2.30    0.30
  -6  -1   5    1.20    0.50
   6  -1  -5    1.70    0.50
  -6   1   4 1373.06  125.09
   6   1  -4 1370.36  124.99
  -6   1   4 1422.46  124.99
   6   1  -4 1307.87  124.99
   6  -1  -4 1386.86  124.99
  -6  -1   4 1448.85  125.09
   6  -1  -4 1366.56  124.99
  -6  -1   4 1431.46  124.99
  -6   1   3   19.10    1.90
   6   1  -3   14.30    1.80
   6   1  -3   13.90    1.80
  -6   1   3   21.40    1.90
  -6  -1   3   18.80    1.90
   6  -1  -3   15.20    1.80
  -6  -1   3   19.60    1.90
   6   1  -2 1487.55  157.08
  -6   1   2 1728.33  157.28
  -6   1   2 1871.01  157.18
   6   1  -2 1906.11  157.18
   6   1  -2 1557.94  157.18
   6  -1  -2 1888.31  157.18
   6  -1  -2 1733.03  157.18
  -6  -1   2 1806.72  157.28
   6   1  -1  266.27   22.50
  -6   1   1  216.38   22.60
   6   1  -1  245.48   22.60
  -6   1   1  279.97   22.50
   6  -1  -1  214.18   22.50
  -6  -1   1  272.97   22.60
   6   1   0 1262.47  130.89
   6   1   0 1566.54  130.89
  -6   1   0 1253.67  130.79
   6   1   0 1593.54  130.79
  -6   1   0 1579.54  130.89
   6  -1   0 1352.46  130.79
  -6  -1   0 1395.06  130.89
  -6  -1   0 1626.74  130.79
   6   1   1   17.70    2.00
   6   1   1   22.90    2.00
   6   1   1   16.80    1.90
  -6  -1  -1   21.50    2.10
   6  -1   1   20.00    1.90
  -6   1  -2 1248.18  109.49
  -6  -1  -2 1155.28  109.49
   6  -1   2 1244.78  109.39
  -6   1  -3   -0.10    0.40
   6   1   3   -0.30    0.30
   6   1   3   -0.20    0.40
   6  -1   3    0.50    0.50
   6  -1   3    0.60    0.30
  -6  -1  -3    0.40    0.40
   6  -1   3    0.50    0.40
   6   1   4  527.05   44.40
   6   1   4  469.75   44.20
  -6   1  -4  460.05   44.40
   6  -1   4  438.26   44.20
   6  -1   4  541.25   44.50
   6  -1   4  549.35   44.20
  -6  -1  -4  449.66   44.40
   6   1   5    0.80    0.40
  -6   1  -5    1.00    0.70
   6   1   5    1.40    0.60
   6   1   5    1.60    0.40
   6  -1   5    1.70    0.30
   6  -1   5    0.80    0.60
  -6  -1  -5    3.40    0.80
   6  -1   5    0.80    0.30
  -6   1  -6   50.89    5.50
   6   1   6   62.59    5.50
   6   1   6   57.19    5.20
   6   1   6   62.89    5.10
   6  -1   6   48.60    5.40
  -6  -1  -6   47.60    5.50
   6   1   7    0.90    0.40
   6   1   7    0.70    0.80
  -6   1  -7    1.70    1.00
   6  -1   7    0.50    0.80
  -6  -1  -7    0.40    1.00
  -6   1  -8    8.00    1.70
  -6  -1  -8    9.20    1.70
   6  -1   8    5.40    1.30
   6   1   9    1.70    1.20
  -6   1  -9   -1.00    1.40
   6  -1   9   -0.10    1.20
  -6  -1  -9    0.60    1.60
   6   1  10    6.00    1.60
  -6   1 -10    6.30    2.10
  -6  -1 -10    5.90    2.10
   6  -1  10    4.70    1.60
  -6   1 -11    2.60    2.40
   6   1  11    2.90    1.70
   6  -1  11    2.30    1.60
  -6  -1 -11    3.40    2.30
  -6   2  14   27.50    3.90
  -6  -2  14   25.00    4.10
  -6   2  13    4.80    1.60
  -6   2  13    5.00    2.00
   6   2 -13    5.70    1.80
   6  -2 -13    6.60    1.50
  -6  -2  13    8.00    1.90
   6   2 -12  117.59   11.20
  -6   2  12  135.49   11.40
   6   2 -12  108.69   11.00
  -6  -2  12  110.99   11.40
   6  -2 -12  122.89   11.10
   6   2 -11   10.80    1.70
  -6   2  11   13.60    2.10
   6   2 -11   10.00    1.50
   6  -2 -11   12.20    1.60
  -6  -2  11   15.20    2.30
   6   2 -10  273.57   26.90
   6   2 -10  278.27   26.90
   6  -2 -10  283.77   26.90
  -6  -2  10  355.76   27.30
  -6   2   9    4.80    0.90
  -6   2   9    6.80    1.20
  -6   2   9    4.80    1.10
   6   2  -9    6.10    0.90
   6   2  -9    6.10    0.90
  -6  -2   9    6.00    0.90
  -6  -2   9    4.90    1.20
   6  -2  -9    4.50    0.90
   6   2  -8  406.86   34.60
  -6   2   8  329.67   34.50
  -6   2   8  363.06   34.60
  -6  -2   8  453.65   34.80
  -6  -2   8  405.86   34.50
   6  -2  -8  337.17   34.60
  -6   2   7    1.00    0.40
  -6   2   7    1.20    0.60
   6   2  -7    1.50    0.50
  -6   2   7    1.00    0.40
   6   2  -7    0.60    0.30
   6  -2  -7    0.20    0.40
  -6  -2   7    0.80    0.60
  -6  -2   7    1.10    0.40
  -6   2   6  496.65   44.60
  -6   2   6  424.56   44.60
   6   2  -6  538.05   44.70
   6   2  -6  496.75   44.60
  -6   2   6  530.35   44.80
   6  -2  -6  571.34   44.70
  -6  -2   6  481.45   44.60
  -6  -2   6  422.36   44.70
  -6   2   5    6.50    0.70
   6   2  -5    3.50    0.70
  -6   2   5    5.00    0.90
   6   2  -5    5.00    0.60
  -6  -2   5    3.70    0.80
  -6  -2   5    6.20    0.60
   6  -2  -5    3.80    0.70
  -6   2   4  341.97   32.20
  -6   2   4  364.86   32.20
   6   2  -4  367.06   32.40
  -6   2   4  367.86   32.40
   6   2  -4  373.66   32.40
  -6  -2   4  339.87   32.40
   6  -2  -4  350.76   32.40
   6   2  -3    8.00    1.20
  -6   2   3   11.70    1.00
   6   2  -3   11.00    1.20
  -6   2   3   12.40    1.30
   6  -2  -3    8.60    1.20
   6  -2  -3   11.00    1.00
   6  -2  -3    8.80    1.20
  -6  -2   3    9.80    1.30
   6   2  -2   26.40    2.70
   6   2  -2   28.20    2.60
  -6   2   2   27.00    2.60
  -6   2   2   23.80    2.70
   6   2  -2   28.70    2.60
  -6  -2   2   30.60    2.80
   6  -2  -2   29.80    2.70
   6   2  -1   21.90    2.60
   6   2  -1   27.50    2.50
   6   2  -1   27.90    2.50
  -6   2   1   23.80    2.50
   6   2  -1   28.80    2.60
  -6   2   1   21.50    2.60
   6  -2  -1   26.90    2.50
  -6  -2   1   28.00    2.60
   6  -2  -1   27.30    2.70
   6  -2  -1   28.50    2.50
  -6   2   0   70.89    6.30
  -6   2   0   60.19    6.20
   6   2   0   61.59    6.20
   6   2   0   67.09    6.20
   6  -2   0   69.49    6.20
  -6  -2   0   74.89    6.30
   6   2   1    1.10    0.40
  -6   2  -1    1.00    0.40
   6   2   1    0.80    0.40
   6   2   1    0.90    0.50
  -6   2  -1    0.90    0.40
   6   2   1    0.60    0.30
  -6  -2  -1    0.50    0.30
   6  -2   1    0.40    0.30
   6   2   2   85.49    8.10
   6   2   2   86.99    8.00
   6   2   2   82.49    8.00
  -6  -2  -2  105.99    8.10
   6  -2   2   76.69    8.00
   6   2   3    0.00    0.40
   6   2   3    0.40    0.40
   6   2   3   -0.40    0.30
  -6   2  -3    0.00    0.50
   6  -2   3    0.90    0.40
  -6  -2  -3    0.00    0.40
   6  -2   3    0.20    0.20
   6  -2   3   -0.20    0.50
  -6   2  -4  485.45   43.40
   6   2   4  524.25   43.30
   6  -2   4  435.96   43.10
  -6  -2  -4  471.05   43.30
   6  -2   4  478.85   43.40
   6   2   5    8.70    1.00
   6   2   5    8.90    1.30
  -6   2  -5    5.80    1.20
   6   2   5    5.80    0.80
   6  -2   5    8.80    1.30
  -6  -2  -5    6.50    1.20
   6   2   6  358.06   28.20
   6   2   6  269.87   27.90
  -6   2  -6  289.67   28.20
   6  -2   6  357.36   28.30
  -6  -2  -6  274.77   28.20
  -6   2  -7    7.00    1.40
   6   2   7    5.40    1.10
  -6  -2  -7    7.70    1.40
   6  -2   7    4.70    1.10
   6   2   8  264.37   21.90
  -6   2  -8  221.98   22.00
  -6  -2  -8  227.28   22.00
   6   2   9    2.70    1.30
  -6   2  -9    2.50    1.60
   6  -2   9    2.00    1.30
  -6  -2  -9    2.60    1.60
  -6   2 -10  116.29   10.40
   6   2  10   95.79   10.00
   6  -2  10   94.29   10.00
  -6  -2 -10  111.59   10.40
   6   2  11    6.20    2.00
  -6   2 -11   10.40    2.60
   6  -2  11    6.50    2.00
  -6  -2 -11   11.10    2.70
  -6   3  14    6.70    2.00
  -6  -3  14   12.20    2.60
  -6   3  13    0.60    1.30
   6   3 -13    1.00    1.60
  -6   3  13    0.00    1.80
  -6  -3  13   -0.50    1.40
   6  -3 -13    2.10    1.20
   6   3 -12    4.70    1.40
   6   3 -12    4.70    1.00
  -6   3  12    2.70    1.30
  -6   3  12    4.80    1.60
  -6  -3  12    3.90    1.40
   6  -3 -12    4.70    1.20
  -6   3  11    0.40    0.90
  -6   3  11   -1.00    1.10
   6   3 -11    1.00    1.00
   6   3 -11    1.20    0.70
   6  -3 -11    0.40    0.80
  -6  -3  11    1.50    1.00
   6   3 -10    6.30    1.10
  -6   3  10    5.30    1.10
   6   3 -10    3.80    0.90
  -6   3  10    6.10    1.20
   6  -3 -10    5.10    1.00
  -6  -3  10    3.70    1.20
   6   3  -9    0.00    0.60
  -6   3   9    0.50    0.70
   6   3  -9    0.30    0.50
  -6   3   9    1.20    0.80
   6  -3  -9    1.10    0.60
  -6  -3   9    0.40    0.80
  -6  -3   9    0.70    0.80
  -6   3   8   54.59    4.90
  -6   3   8   53.79    5.10
  -6   3   8   49.70    5.00
   6   3  -8   53.29    4.90
   6   3  -8   52.79    4.90
  -6  -3   8   46.10    4.90
  -6   3   7    5.60    0.90
   6   3  -7    7.30    0.90
  -6   3   7    7.90    1.10
   6   3  -7    6.00    1.00
  -6  -3   7    8.10    1.20
  -6  -3   7    6.20    0.90
   6  -3  -7    8.30    1.10
   6   3  -6  299.27   26.60
  -6   3   6  318.57   26.50
  -6   3   6  290.27   26.70
   6   3  -6  292.97   26.50
   6  -3  -6  324.47   26.60
  -6  -3   6  289.77   26.70
  -6  -3   6  241.18   26.50
   6   3  -5   42.40    3.80
  -6   3   5   43.40    3.80
   6   3  -5   41.30    3.90
  -6   3   5   37.30    4.00
  -6  -3   5   41.60    4.00
   6  -3  -5   37.90    3.90
   6   3  -4  861.21   80.09
   6   3  -4  888.81   80.19
  -6   3   4  933.61   80.09
  -6   3   4  839.32   80.29
   6  -3  -4  888.01   80.19
  -6  -3   4  931.61   80.29
  -6  -3   4  938.01   80.09
   6  -3  -4  840.02   80.19
   6   3  -3    1.90    0.60
  -6   3   3    2.50    0.50
  -6   3   3    2.10    0.50
  -6   3   3    1.80    0.40
   6   3  -3    2.10    0.30
   6   3  -3    2.20    0.50
   6   3  -3    2.10    0.30
   6   3  -3    1.80    0.50
   6  -3  -3    1.50    0.40
   6  -3  -3    1.40    0.50
  -6  -3   3    2.50    0.70
   6  -3  -3    2.40    0.40
   6   3  -2 2082.09  198.18
   6   3  -2 2372.76  198.28
  -6   3   2 2257.17  198.38
   6   3  -2 2318.27  198.28
  -6   3   2 2074.49  198.18
   6  -3  -2 2098.29  198.18
   6  -3  -2 2219.08  198.08
  -6  -3   2 2202.48  198.28
  -6   3   1    8.20    1.20
   6   3  -1    6.70    1.10
   6   3  -1   11.00    1.30
   6   3  -1   10.30    1.00
  -6   3   1    8.20    1.20
   6   3  -1    8.80    1.00
  -6   3   1   10.80    1.00
   6   3  -1    9.50    1.10
   6  -3  -1   12.30    1.30
  -6  -3   1   10.50    1.20
   6  -3  -1   11.30    1.10
   6  -3  -1    8.10    1.00
  -6   3   0 1059.99  109.19
  -6   3   0 1286.97  109.29
   6   3   0 1207.98  109.29
   6   3   0 1160.58  109.19
   6   3   0 1394.46  109.19
  -6  -3   0 1176.58  109.29
   6  -3   0 1250.67  109.19
   6  -3   0 1168.38  109.19
   6   3   1   15.70    1.70
  -6   3  -1   17.90    1.70
  -6   3  -1   14.50    1.60
   6   3   1   13.10    1.60
   6   3   1   14.20    1.60
   6  -3   1   11.80    1.60
  -6  -3  -1   17.30    1.70
  -6   3  -2 1596.94  145.99
   6   3   2 1486.05  145.89
   6  -3   2 1708.53  146.09
   6  -3   2 1683.13  145.89
  -6  -3  -2 1569.34  145.99
   6  -3   2 1684.53  145.89
   6   3   3   35.90    3.70
  -6   3  -3   40.50    3.80
   6  -3   3   37.40    3.80
   6  -3   3   38.20    3.50
  -6   3  -4  488.35   46.00
   6   3   4  483.05   45.80
   6   3   4  606.64   46.00
  -6  -3  -4  466.05   45.90
   6  -3   4  496.15   45.70
  -6   3  -5   22.90    2.50
   6   3   5   21.70    2.40
   6   3   5   16.10    2.10
  -6  -3  -5   20.70    2.50
   6  -3   5   26.90    2.50
  -6   3  -6   89.49   10.10
   6   3   6  109.59   10.00
   6   3   6  116.99    9.80
  -6  -3  -6   93.29   10.10
   6  -3   6  126.39   10.20
  -6   3  -7   11.10    1.90
   6   3   7    9.60    1.50
   6   3   7   11.30    1.70
   6  -3   7   14.00    2.00
  -6  -3  -7   12.90    1.90
  -6   3  -8    7.30    1.70
  -6  -3  -8    8.30    1.80
   6  -3   8    9.10    1.70
   6   3   9    0.80    1.20
  -6   3  -9    0.30    1.30
  -6  -3  -9   -0.20    1.50
   6  -3   9   -1.00    1.20
  -6   3 -10   35.50    4.40
   6   3  10   26.20    4.00
  -6  -3 -10   31.00    4.40
   6  -3  10   32.80    4.00
   6   3  11   18.60    3.10
   6  -3  11   29.60    3.80
  -6   4  14   49.90    6.40
  -6  -4  14   69.69    6.80
  -6   4  13    3.40    2.20
  -6   4  13    4.80    1.60
   6   4 -13    6.90    1.90
  -6  -4  13    6.30    1.90
   6  -4 -13    2.90    1.40
   6   4 -12   44.90    4.70
   6   4 -12   51.49    5.10
  -6   4  12   46.10    5.30
  -6  -4  12   46.30    5.20
  -6   4  11    1.70    1.10
   6   4 -11    1.90    1.00
   6   4 -11    1.70    0.80
  -6   4  11    3.70    1.30
  -6  -4  11    1.40    1.10
   6  -4 -11    2.40    0.90
  -6   4  10  155.58   14.30
   6   4 -10  141.89   14.10
  -6  -4  10  173.58   14.50
   6  -4 -10  147.49   14.20
   6   4  -9    0.30    0.70
  -6   4   9    1.60    0.70
  -6   4   9    0.50    0.70
   6   4  -9   -0.10    0.50
   6  -4  -9    0.30    0.60
  -6  -4   9    0.60    0.80
   6   4  -8  352.46   31.70
  -6   4   8  349.17   31.70
   6   4  -8  359.76   31.80
  -6  -4   8  341.47   32.00
   6   4  -7    1.50    0.60
  -6   4   7    1.80    0.60
  -6   4   7    1.50    0.60
  -6   4   7    2.40    0.70
   6  -4  -7    2.50    0.60
  -6  -4   7    2.50    0.60
  -6  -4   7    1.80    0.80
  -6   4   6  243.38   23.90
  -6   4   6  272.57   24.10
   6   4  -6  275.57   24.00
   6   4  -6  272.07   23.90
   6  -4  -6  273.97   24.00
  -6  -4   6  274.67   24.10
  -6  -4   6  241.18   23.90
   6   4  -5   21.80    2.40
  -6   4   5   25.90    2.50
  -6   4   5   22.30    2.30
   6   4  -5   25.10    2.20
  -6   4   5   27.50    2.30
   6  -4  -5   19.60    2.30
  -6  -4   5   22.60    2.50
  -6  -4   5   21.00    2.30
   6   4  -4  647.14   67.99
   6   4  -4  784.92   68.19
  -6   4   4  766.92   68.19
  -6   4   4  770.42   67.99
  -6  -4   4  799.42   68.19
  -6  -4   4  763.62   67.99
   6  -4  -4  758.12   68.09
  -6   4   3    1.60    0.30
  -6   4   3    1.30    0.50
   6   4  -3    2.00    0.50
   6   4  -3    1.50    0.50
   6   4  -3    1.40    0.30
   6  -4  -3    1.80    0.40
   6  -4  -3    0.90    0.40
  -6  -4   3    1.30    0.50
   6  -4  -3    1.40    0.50
   6   4  -2   32.00    3.30
   6   4  -2   37.80    3.30
  -6   4   2   39.30    3.40
  -6   4   2   36.40    3.30
  -6  -4   2   32.50    3.40
   6  -4  -2   32.90    3.40
   6  -4  -2   34.30    3.30
  -6   4   1   20.50    2.40
   6   4  -1   25.30    2.40
   6   4  -1   26.50    2.50
   6   4  -1   27.60    2.40
  -6   4   1   23.10    2.30
   6  -4  -1   21.80    2.30
   6  -4  -1   23.50    2.50
  -6  -4   1   23.30    2.50
   6  -4  -1   26.00    2.40
   6   4   0   20.00    1.90
   6   4   0   22.30    2.00
  -6   4   0   14.90    1.90
   6   4   0   16.60    1.90
  -6   4   0   20.80    2.00
   6   4   0   14.00    1.90
  -6   4   0   22.70    1.90
   6  -4   0   17.40    1.90
  -6  -4   0   18.70    1.90
   6  -4   0   18.20    1.80
   6   4   1    3.10    0.70
  -6   4  -1    1.90    0.50
   6   4   1    0.90    0.60
   6   4   1    2.10    0.60
  -6   4  -1    1.50    0.50
   6  -4   1    1.00    0.50
  -6  -4  -1    2.40    0.50
   6   4   2   69.89    6.20
   6   4   2   67.79    6.20
  -6   4  -2   56.09    6.10
  -6   4  -2   67.29    6.20
   6   4   2   72.29    6.20
   6  -4   2   66.09    6.30
   6  -4   2   63.49    6.00
  -6   4  -3   15.90    1.90
   6   4   3   17.70    1.90
   6   4   3   15.00    1.80
   6  -4   3   15.20    1.50
  -6   4  -4  316.97   33.10
   6   4   4  355.76   33.00
   6  -4   4  379.56   33.20
   6  -4   4  403.46   32.80
   6   4   5    0.00    0.60
  -6   4  -5   -0.40    0.70
   6  -4   5    0.50    0.60
   6   4   6  543.65   49.60
  -6   4  -6  552.04   49.70
   6  -4   6  548.65   49.70
  -6   4  -7    0.90    1.00
   6   4   7    1.20    0.90
   6   4   8  271.57   22.50
  -6   4  -8  250.27   22.60
   6  -4   8  211.68   22.50
   6   4   9    0.80    1.30
  -6   4  -9   -1.20    1.30
   6  -4   9    0.10    1.20
   6   4  10  107.59   10.30
  -6   4 -10  109.59   10.50
   6  -4  10  100.89   10.40
  -6   5  13    9.50    2.40
  -6   5  13   10.10    2.10
  -6  -5  13   10.50    2.10
   6  -5 -13   10.70    1.90
   6   5 -12    1.90    1.40
  -6   5  12    4.90    1.40
  -6   5  12    2.40    1.60
   6   5 -12    3.40    1.00
  -6  -5  12    4.00    1.50
   6  -5 -12    2.20    1.20
  -6   5  11    0.10    1.00
   6   5 -11    0.20    1.00
  -6   5  11   -0.10    1.20
   6   5 -11   -0.10    0.70
   6  -5 -11   -0.30    0.90
  -6  -5  11    1.90    1.10
  -6   5  10    0.70    1.00
  -6   5  10    2.30    1.00
   6   5 -10    1.00    0.70
   6   5 -10    1.70    0.90
   6  -5 -10    2.90    0.90
  -6   5   9   23.40    2.50
   6   5  -9   17.40    2.20
  -6   5   9   23.50    2.50
  -6  -5   9   16.20    2.60
   6  -5  -9   19.30    2.30
   6   5  -8   70.99    6.50
   6   5  -8   70.59    6.60
  -6   5   8   62.29    6.60
  -6  -5   8   65.99    6.80
  -6  -5   8   76.59    6.60
  -6   5   7   10.30    1.40
  -6   5   7    7.40    1.10
  -6   5   7    6.80    1.10
   6   5  -7    8.90    1.10
   6   5  -7    7.90    1.10
  -6  -5   7    6.20    1.20
  -6  -5   7    6.60    1.10
   6  -5  -7    8.60    1.20
  -6   5   6  169.18   16.90
  -6   5   6  212.88   17.10
   6   5  -6  173.28   17.00
  -6  -5   6  197.88   17.10
   6  -5  -6  179.18   17.00
  -6  -5   6  187.08   17.00
   6   5  -5   24.20    2.20
   6   5  -5   23.70    2.40
  -6   5   5   24.50    2.40
  -6  -5   5   20.80    2.30
   6  -5  -5   25.20    2.40
  -6  -5   5   18.90    2.40
   6  -5  -5   19.70    2.30
   6   5  -4  689.93   57.69
   6   5  -4  700.23   57.89
  -6   5   4  595.64   57.79
  -6  -5   4  697.03   57.89
   6  -5  -4  669.93   57.79
   6  -5  -4  678.13   57.79
  -6  -5   4  554.74   57.69
   6  -5  -4  540.05   57.69
   6   5  -3   56.19    5.20
   6   5  -3   57.89    5.30
  -6   5   3   50.49    5.20
   6   5  -3   54.19    5.10
   6  -5  -3   59.79    5.20
   6  -5  -3   51.99    5.20
  -6  -5   3   59.29    5.20
  -6  -5   3   53.09    5.30
   6  -5  -3   56.89    5.20
   6   5  -2 1000.30   85.19
  -6   5   2 1025.80   85.19
  -6   5   2  917.61   85.19
  -6  -5   2 1007.30   85.29
   6  -5  -2  954.20   85.29
   6  -5  -2  787.12   85.19
   6  -5  -2  930.01   85.19
   6   5  -1    1.10    0.40
  -6   5   1    1.20    0.40
  -6   5   1    1.40    0.50
   6   5  -1    1.50    0.40
  -6   5   1    1.60    0.60
   6  -5  -1    0.80    0.40
  -6  -5   1    0.50    0.40
   6  -5  -1    0.90    0.40
   6  -5  -1    1.50    0.60
   6   5   0 1052.19  106.89
   6   5   0 1354.06  106.99
  -6   5   0 1052.49  106.89
   6  -5   0 1291.17  106.89
   6   5   1   37.90    3.60
  -6   5  -1   35.40    3.50
  -6   5  -1   35.00    3.60
   6   5   1   30.10    3.50
   6   5   1   38.00    3.60
   6  -5   1   42.30    3.50
  -6  -5  -1   33.60    3.50
   6  -5   1   41.70    3.60
  -6   5  -2  414.06   41.00
   6   5   2  458.35   41.10
   6   5   2  488.05   41.10
   6  -5   2  457.15   41.20
  -6   5  -3  133.39   11.60
   6   5   3  111.49   11.50
  -6   5  -3  126.79   11.40
   6  -5   3  125.29   11.30
   6  -5   3  127.89   11.60
   6   5   4  164.98   13.10
  -6   5  -4  133.79   13.20
   6  -5   4  138.79   13.20
  -6  -5  -4  119.79   13.00
   6  -5   4  153.38   12.90
  -6   5  -5   19.20    2.70
   6   5   5   26.40    2.60
  -6  -5  -5   20.60    2.40
   6  -5   5   25.50    2.70
   6   5   6   70.29    7.60
  -6   5  -6   94.19    7.90
   6  -5   6   80.79    7.80
   6   5   7    1.30    0.90
   6  -5   7    0.10    0.80
  -6   5  -8    2.10    1.20
   6   5   8    4.70    1.30
   6  -5   8    3.30    1.20
   6   5   9   35.40    4.10
  -6   5  -9   38.80    4.50
   6  -5   9   31.90    4.20
  -6   5 -10   20.00    3.10
   6   5  10   23.50    3.60
   6  -5  10   23.00    3.60
   6   6 -13    0.70    1.80
  -6   6  13   -1.30    1.70
  -6   6  13   -1.50    2.10
  -6  -6  13    3.30    1.80
   6  -6 -13   -3.20    1.30
  -6   6  12  177.38   16.80
  -6   6  12  169.88   16.80
   6   6 -12  189.78   16.70
   6  -6 -12  175.68   16.60
  -6  -6  12  183.28   16.90
   6   6 -11   29.60    3.20
  -6   6  11   27.70    3.60
  -6   6  11   27.40    3.70
   6   6 -11   34.10    3.60
   6  -6 -11   30.10    3.40
  -6  -6  11   31.10    3.80
   6   6 -10  152.58   14.10
  -6   6  10  145.39   14.20
   6  -6 -10  168.18   14.20
  -6  -6  10  145.69   14.40
   6   6  -9    1.40    0.70
   6   6  -9    1.10    0.80
  -6   6   9    0.80    0.90
  -6   6   9    1.90    0.90
   6  -6  -9    1.80    0.80
  -6  -6   9    0.50    0.90
  -6   6   8  213.98   20.60
   6   6  -8  250.67   20.60
  -6   6   8  227.58   20.60
   6  -6  -8  210.18   20.60
  -6  -6   8  226.78   20.80
   6   6  -7    0.20    0.50
  -6   6   7    0.50    0.60
  -6   6   7    0.40    0.60
   6   6  -7    0.80    0.50
   6  -6  -7    0.00    0.60
  -6  -6   7    1.80    0.80
  -6  -6   7    0.00    0.90
   6   6  -6  693.73   56.59
   6   6  -6  535.35   56.69
  -6   6   6  706.83   56.79
  -6  -6   6  600.34   56.69
   6  -6  -6  602.24   56.69
  -6   6   5   52.19    5.60
   6   6  -5   50.39    5.60
  -6   6   5   66.89    5.60
  -6  -6   5   56.79    5.70
   6  -6  -5   65.99    5.60
   6  -6  -5   66.29    5.70
  -6  -6   5   58.69    5.60
  -6   6   4  103.99   10.60
  -6   6   4  126.49   10.60
   6  -6  -4  118.79   10.60
   6  -6  -4  120.59   10.60
  -6  -6   4  107.19   10.60
  -6   6   3   41.80    3.60
  -6   6   3   38.20    3.70
   6   6  -3   40.40    3.70
   6  -6  -3   32.80    3.60
  -6  -6   3   39.80    3.80
  -6  -6   3   36.50    3.70
   6  -6  -3   36.90    3.70
  -6   6   2   27.30    2.60
  -6   6   2   25.90    2.60
  -6  -6   2   27.50    2.70
   6  -6  -2   22.60    2.50
   6  -6  -2   26.40    2.70
   6   6  -1   28.20    3.20
  -6   6   1   28.90    3.10
  -6   6   1   32.60    3.20
   6   6  -1   38.10    3.20
   6  -6  -1   34.00    3.30
   6  -6  -1   33.30    3.10
   6  -6  -1   26.70    3.20
  -6  -6   1   36.50    3.20
  -6   6   0   28.00    2.50
   6   6   0   24.70    2.50
  -6   6   0   22.80    2.40
   6  -6   0   22.30    2.30
  -6  -6   0   22.20    2.40
   6  -6   0   24.80    2.50
   6   6   1    5.50    0.90
  -6   6  -1    8.10    1.10
   6   6   1    5.70    0.90
  -6   6  -1    5.30    0.90
   6  -6   1    7.40    0.80
   6  -6   1    6.20    1.10
  -6  -6  -1    6.40    1.00
  -6  -6  -1    5.50    0.90
   6   6   2  322.07   29.10
  -6   6  -2  362.16   29.20
  -6   6  -2  290.37   29.00
   6   6   2  288.67   29.00
  -6  -6  -2  313.27   29.10
   6  -6   2  349.37   29.00
  -6   6  -3  227.28   22.90
   6   6   3  263.47   23.00
   6   6   3  233.78   23.10
   6  -6   3  275.17   22.90
   6  -6   3  250.27   23.10
  -6  -6  -3  267.77   23.00
   6   6   4  347.57   28.10
  -6   6  -4  277.57   28.10
   6   6   4  308.67   28.20
   6  -6   4  301.47   27.90
  -6  -6  -4  336.67   28.10
   6  -6   4  283.47   28.20
   6   6   5    0.50    0.70
  -6   6  -5    0.80    0.80
  -6  -6  -5    2.10    0.70
   6  -6   5    1.30    0.80
  -6   6  -6  235.88   21.80
   6   6   6  225.38   21.60
  -6  -6  -6  226.28   21.60
   6  -6   6  261.57   21.90
   6   6   7    0.80    0.90
  -6   6  -7    1.10    1.10
   6  -6   7    0.90    1.00
  -6  -6  -7    1.30    0.90
  -6   6  -8  187.98   17.30
   6   6   8  191.08   17.20
   6  -6   8  176.28   17.30
  -6   6  -9    1.10    1.40
   6   6   9   -1.20    1.40
   6  -6   9    2.10    1.30
   6   6  10  148.89   15.60
   6  -6  10  183.18   15.80
  -6   7  13    2.80    1.90
  -6   7  13    3.50    2.20
   6  -7 -13    6.60    1.60
  -6  -7  13    2.90    1.90
  -6   7  12   55.19    6.40
  -6   7  12   59.19    6.20
   6   7 -12   61.99    6.20
   6  -7 -12   56.59    5.90
  -6  -7  12   56.49    6.30
  -6   7  11   -2.20    1.40
  -6   7  11   -0.20    1.20
   6   7 -11    0.30    1.20
   6   7 -11   -0.60    0.90
   6  -7 -11   -0.40    0.90
  -6  -7  11    1.60    1.20
  -6   7  10    0.30    1.00
   6   7 -10   -0.10    1.00
  -6   7  10    0.80    1.10
   6   7 -10   -1.80    0.70
  -6  -7  10    0.90    1.10
  -6   7   9   27.50    3.10
  -6   7   9   26.20    3.10
   6   7  -9   24.80    2.90
  -6  -7   9   32.20    3.40
   6  -7  -9   26.10    3.00
  -6   7   8   18.50    2.40
   6   7  -8   19.50    2.30
  -6   7   8   23.40    2.40
   6   7  -8   16.30    2.20
   6  -7  -8   21.60    2.30
  -6  -7   8   18.90    2.60
   6   7  -7   23.70    2.70
  -6   7   7   24.50    2.70
  -6  -7   7   24.80    2.90
   6  -7  -7   26.70    2.70
  -6   7   6  114.69   11.30
  -6   7   6  113.99   11.30
   6   7  -6  139.99   11.20
  -6  -7   6  112.39   11.40
   6  -7  -6  129.79   11.30
   6   7  -5    2.00    0.60
  -6   7   5    2.80    0.70
   6   7  -5    2.50    0.50
  -6   7   5    3.80    0.70
   6  -7  -5    3.40    0.80
   6  -7  -5    3.40    0.70
  -6  -7   5    0.70    0.80
  -6  -7   5    2.90    0.80
  -6   7   4  320.07   30.40
   6   7  -4  346.77   30.50
  -6   7   4  348.27   30.40
   6  -7  -4  339.87   30.40
   6  -7  -4  332.87   30.40
  -6  -7   4  341.97   30.50
   6  -7  -4  318.07   30.40
   6   7  -3   16.00    2.00
  -6   7   3   22.70    2.10
  -6   7   3   16.60    2.10
  -6  -7   3   19.80    2.30
  -6  -7   3   23.20    2.20
   6  -7  -3   21.30    2.20
   6  -7  -3   23.90    2.30
   6  -7  -3   21.90    2.10
   6   7  -2  847.02   82.99
  -6   7   2  974.50   83.09
  -6   7   2  871.81   83.09
   6   7  -2  955.60   83.09
   6  -7  -2  940.21   83.09
  -6  -7   2  997.40   83.09
   6  -7  -2  836.72   83.09
   6  -7  -2  951.60   83.09
  -6   7   1   15.90    1.80
   6   7  -1   18.10    1.90
   6  -7  -1   17.50    1.80
  -6  -7   1   16.90    1.90
  -6   7   0  766.12   68.09
   6   7   0  746.63   68.09
   6   7   0  856.61   68.19
  -6  -7   0  696.33   68.19
  -6  -7   0  758.22   68.09
   6  -7   0  709.13   67.99
  -6   7  -1    1.20    0.50
   6   7   1    1.40    0.60
   6   7   1    1.10    0.50
  -6   7  -1    1.20    0.70
   6  -7   1    0.90    0.40
   6  -7   1    0.90    0.60
  -6  -7  -1    0.90    0.50
  -6  -7  -1    0.90    0.50
  -6   7  -2  348.37   37.30
  -6   7  -2  448.06   37.40
   6   7   2  428.56   37.40
   6  -7   2  426.56   37.20
   6   7   3    5.70    1.00
   6   7   3    5.70    1.00
   6   7   3    6.30    0.90
  -6   7  -3    6.50    0.90
  -6   7  -3    3.50    1.00
  -6  -7  -3    4.10    0.90
   6  -7   3    5.50    1.10
   6   7   4  219.88   16.60
  -6   7  -4  176.28   16.40
  -6  -7  -4  169.98   16.30
   6  -7   4  158.38   16.40
   6  -7   4  168.78   16.10
   6   7   5   28.40    2.90
  -6   7  -5   20.50    2.70
   6  -7   5   19.70    2.60
  -6  -7  -5   19.60    2.50
  -6   7  -6   55.49    5.50
  -6  -7  -6   51.39    5.30
   6   7   7    5.40    1.20
   6   7   7    3.30    1.60
  -6   7  -7    5.00    1.40
   6  -7   7    4.10    1.40
  -6  -7  -7    2.70    1.10
   6   7   8    2.30    1.90
   6   7   8    3.30    1.40
  -6   7  -8    3.10    1.50
   6  -7   8    2.90    1.40
  -6  -7  -8    2.20    1.10
   6   7   9   -1.00    1.90
  -6   7  -9    0.30    1.60
   6  -7   9    3.10    1.50
   6   7  10   -0.10    2.40
  -6   7 -10    1.60    2.00
   6  -7  10   -0.20    1.80
  -6   8  13   16.50    3.00
  -6  -8  13   13.20    2.90
   6  -8 -13   14.80    2.40
   6   8 -12   35.00    4.20
  -6   8  12   30.50    4.40
  -6  -8  12   32.10    4.30
   6  -8 -12   27.80    3.70
   6   8 -11    2.20    1.40
  -6   8  11    2.50    1.50
   6   8 -11    2.90    1.10
  -6   8  11    4.80    1.60
  -6  -8  11    3.00    1.50
   6  -8 -11    3.20    1.20
  -6   8  10   84.09    9.10
   6   8 -10  102.39    9.10
  -6   8  10   96.49    9.10
   6   8 -10   90.69    8.90
  -6  -8  10  114.49    9.50
   6  -8 -10   86.39    9.00
   6   8  -9    5.70    1.10
   6   8  -9    6.20    1.20
  -6   8   9    5.10    1.20
  -6   8   9    7.30    1.30
  -6  -8   9    4.30    1.40
  -6   8   8  301.77   24.30
  -6   8   8  235.68   24.30
   6   8  -8  240.58   24.30
  -6  -8   8  287.47   24.50
   6  -8  -8  268.57   24.30
   6   8  -7    3.20    0.90
  -6   8   7    4.70    1.00
  -6   8   7    7.20    1.10
   6   8  -7    5.40    0.90
  -6  -8   7    5.70    1.20
   6  -8  -7    6.10    1.10
   6   8  -6  205.38   17.20
  -6   8   6  202.78   17.30
   6   8  -6  173.78   17.30
   6  -8  -6  192.38   17.30
  -6  -8   6  168.28   17.30
  -6   8   5  152.58   13.90
   6   8  -5  152.08   13.80
   6  -8  -5  161.28   13.90
  -6  -8   5  140.39   14.00
   6  -8  -5  151.48   13.90
  -6   8   4   41.50    3.90
  -6   8   4   35.00    3.90
   6   8  -4   40.20    3.90
   6  -8  -4   47.60    4.00
  -6  -8   4   38.70    4.00
   6   8  -3   49.50    4.70
  -6   8   3   45.90    4.70
  -6  -8   3   53.59    4.90
   6  -8  -3   48.20    4.70
  -6  -8   3   52.99    4.80
   6  -8  -3   46.90    4.70
   6   8  -2    8.20    1.00
   6   8  -2    6.40    1.00
  -6   8   2    5.40    0.90
   6  -8  -2    6.10    0.90
   6  -8  -2    6.70    1.00
  -6  -8   2    4.80    0.90
  -6   8   1   48.10    4.40
   6   8  -1   42.30    4.40
  -6  -8   1   48.30    4.50
   6  -8  -1   47.20    4.40
  -6  -8   1   43.70    4.40
  -6   8   0    9.10    1.20
   6   8   0    8.20    1.20
   6   8   0    6.50    1.10
  -6  -8   0    6.70    1.20
  -6  -8   0    8.10    1.10
   6  -8   0    7.70    1.00
   6  -8   0    6.10    1.10
   6   8   1   81.99    7.50
  -6   8  -1   63.99    7.40
   6  -8   1   84.59    7.30
  -6  -8  -1   73.49    7.50
  -6  -8  -1   88.39    7.40
   6  -8   1   84.89    7.60
  -6   8  -2   95.59    8.60
   6  -8   2   89.69    8.60
  -6  -8  -2   88.49    8.60
   6   8   3   16.60    1.90
  -6   8  -3   13.40    1.90
   6   8   3   17.00    2.10
   6   8   3   15.80    1.80
   6  -8   3   17.10    1.60
  -6  -8  -3   13.50    1.90
   6  -8   3   12.30    2.00
  -6   8  -4  199.88   18.50
  -6  -8  -4  188.28   18.50
   6  -8   4  201.88   18.20
   6  -8   4  215.48   18.60
  -6   8  -5   34.20    3.70
   6   8   5   36.20    3.50
   6   8   5   30.10    3.70
   6  -8   5   28.70    3.60
  -6  -8  -5   38.60    3.70
   6   8   6  173.18   15.00
  -6   8  -6  159.08   15.20
  -6  -8  -6  154.78   15.10
   6  -8   6  163.08   15.20
   6   8   7   -0.30    1.40
   6   8   7    2.40    1.20
  -6   8  -7    0.30    1.20
  -6  -8  -7    1.30    1.10
   6  -8   7    1.90    1.20
  -6   8  -8  107.19   12.10
   6   8   8  119.99   12.40
   6   8   8  149.88   12.00
  -6  -8  -8  146.09   11.90
   6  -8   8  107.59   12.10
  -6   8  -9    2.50    1.70
   6   8   9    0.90    2.20
   6  -8   9    3.10    1.70
  -6   9  12    4.20    2.20
   6   9 -12    7.50    2.10
  -6  -9  12    8.90    2.30
   6  -9 -12    9.50    1.80
  -6   9  11   20.10    3.20
   6   9 -11   24.80    3.50
   6   9 -11   31.40    3.10
   6  -9 -11   28.50    3.20
  -6  -9  11   20.70    3.30
  -6   9  10    1.30    1.40
   6   9 -10    1.40    0.90
   6   9 -10    2.20    1.30
  -6   9  10    1.20    1.30
   6  -9 -10    0.40    1.10
  -6  -9  10   -1.10    1.40
  -6   9   9   25.20    3.00
   6   9  -9   22.40    2.90
  -6   9   9   27.90    3.10
   6   9  -9   25.60    2.90
  -6  -9   9   22.80    3.30
   6  -9  -9   22.40    2.90
  -6   9   8   27.70    3.20
   6   9  -8   26.70    3.10
  -6   9   8   30.20    3.10
   6  -9  -8   28.50    3.20
  -6  -9   8   28.60    3.40
   6   9  -7   23.10    2.60
  -6   9   7   19.20    2.80
   6   9  -7   28.00    2.80
  -6   9   7   29.80    2.80
  -6  -9   7   21.10    3.00
   6  -9  -7   28.90    2.80
   6   9  -6  247.78   20.90
   6   9  -6  186.58   21.00
  -6   9   6  252.37   20.90
   6   9  -5  105.09    9.80
  -6   9   5   94.29    9.80
  -6   9   5  110.49    9.90
  -6  -9   5  109.19   10.00
   6  -9  -5  113.59    9.90
  -6   9   4  577.24   47.90
  -6   9   4  526.15   47.80
   6   9  -4  509.25   47.80
   6  -9  -4  589.64   47.80
   6  -9  -4  444.26   47.80
  -6   9   3   45.50    4.00
  -6   9   3   35.20    4.10
   6   9  -3   36.70    4.00
   6  -9  -3   47.30    4.10
  -6  -9   3   37.80    4.10
   6  -9  -3   49.90    4.10
   6   9  -2  403.36   35.60
   6   9  -2  335.77   35.50
  -6   9   2  424.36   35.60
   6  -9  -2  410.06   35.60
   6   9  -1    7.30    1.10
  -6   9   1    9.90    1.30
   6   9  -1    8.20    1.30
   6  -9  -1    9.80    1.40
  -6  -9   1    5.90    1.20
  -6  -9   1   11.00    1.30
   6  -9  -1    8.10    1.20
   6   9   0  483.15   46.60
  -6   9   0  486.85   46.70
   6  -9   0  533.95   46.60
   6  -9   0  567.74   46.80
  -6  -9   0  511.35   46.60
   6   9   1    0.70    0.60
  -6   9  -1    1.40    0.70
   6   9   1    0.60    0.60
   6  -9   1    0.90    0.60
   6  -9   1    0.60    0.40
  -6  -9  -1    0.50    0.70
  -6   9  -2  257.77   23.90
   6   9   2  289.37   23.80
   6   9   2  279.67   24.00
   6   9   2  223.38   23.70
  -6  -9  -2  257.27   23.90
   6  -9   2  267.27   24.00
   6   9   3    1.60    0.70
   6   9   3    0.70    0.80
  -6   9  -3    0.50    0.70
  -6  -9  -3    0.80    0.80
   6  -9   3    0.20    0.70
   6  -9   3    1.30    0.50
  -6   9  -4  172.88   13.80
   6   9   4  154.28   13.50
  -6  -9  -4  128.39   13.60
   6  -9   4  133.49   13.70
   6   9   5   -0.30    0.70
   6   9   5    1.80    1.10
   6  -9   5    1.10    0.90
  -6  -9  -5    1.20    1.00
  -6   9  -6   26.30    3.10
   6   9   6   24.80    3.20
  -6  -9  -6   19.20    2.90
   6  -9   6   23.80    3.10
  -6   9  -7   19.10    3.00
   6   9   7   23.40    3.30
  -6  -9  -7   17.60    2.50
   6  -9   7   18.80    3.00
   6   9   8    3.90    2.00
  -6   9  -8    4.50    1.60
   6  -9   8    4.60    1.70
  -6  -9  -8    2.00    1.50
   6   9   9   11.60    2.80
  -6   9  -9   16.00    2.60
   6  -9   9   12.10    2.60
  -6  10  12   58.69    7.20
  -6 -10  12   67.29    7.30
   6 -10 -12   67.89    6.90
  -6  10  11    3.40    1.80
   6  10 -11   -1.10    1.50
  -6 -10  11   -1.10    1.60
   6 -10 -11    1.70    1.30
  -6  10  10   50.49    5.70
   6  10 -10   56.29    5.50
   6  10 -10   53.19    5.30
  -6 -10  10   49.90    5.90
   6 -10 -10   54.39    5.50
   6  10  -9    4.20    1.10
  -6  10   9    3.90    1.10
   6  10  -9    3.80    1.20
  -6  10   9    3.40    1.30
  -6 -10   9    3.70    1.40
   6 -10  -9    3.40    1.10
   6  10  -8   91.79    9.10
  -6  10   8   99.09    9.00
   6  10  -8  105.59    9.00
  -6  10   8   88.79    9.10
   6 -10  -8   94.69    9.10
  -6 -10   8   94.89    9.30
   6  10  -7    2.70    0.80
  -6  10   7    2.70    1.00
  -6  10   7    4.10    0.90
   6  10  -7    3.60    1.10
  -6 -10   7    3.60    1.20
   6  10  -6  153.58   13.70
   6  10  -6  146.09   13.50
  -6  10   6  141.19   13.60
  -6  10   6  143.39   13.40
  -6 -10   6  149.99   13.70
   6 -10  -6  148.19   13.60
   6  10  -5    3.30    0.70
  -6  10   5    3.70    0.90
  -6  10   5    2.90    0.80
   6 -10  -5    3.10    0.80
  -6 -10   5    2.50    0.90
   6  10  -4   37.60    3.80
  -6  10   4   38.10    3.80
  -6  10   4   38.20    3.90
   6 -10  -4   47.40    3.90
  -6 -10   4   35.20    3.90
   6  10  -3   31.50    2.80
  -6  10   3   26.10    2.90
  -6 -10   3   23.40    2.90
   6 -10  -3   28.90    2.90
   6 -10  -3   27.40    2.90
   6  10  -2   26.80    2.50
   6  10  -2   22.00    2.60
  -6  10   2   20.60    2.50
   6 -10  -2   26.60    2.50
  -6 -10   2   21.10    2.40
  -6 -10   2   20.90    2.60
   6  10  -1   37.00    4.20
  -6  10   1   43.60    4.30
   6 -10  -1   40.60    4.30
   6 -10  -1   53.49    4.30
  -6 -10   1   42.40    4.40
  -6 -10   1   46.60    4.30
  -6  10   0    1.50    0.70
   6  10   0    2.80    0.70
   6  10   0    2.00    0.80
   6 -10   0    3.30    0.80
  -6 -10   0    2.90    0.80
   6 -10   0    4.20    0.70
  -6 -10   0    2.40    0.60
  -6  10  -1   41.70    4.40
   6  10   1   39.00    4.40
   6  10   1   45.50    4.20
   6 -10   1   41.50    4.40
  -6 -10  -1   56.09    4.60
  -6  10  -2  103.89    8.90
   6 -10   2   96.09    8.70
   6 -10   2   84.69    8.90
  -6 -10  -2   92.99    9.00
  -6  10  -3   56.69    5.10
   6  10   3   47.90    4.80
   6  10   3   61.69    5.20
   6 -10   3   50.79    4.80
  -6 -10  -3   48.30    5.10
   6 -10   3   42.20    5.00
   6  10   4  112.19    9.40
   6  10   4   96.89    9.70
  -6  10  -4   97.89    9.60
  -6 -10  -4  101.09    9.70
   6 -10   4  101.89    9.30
   6 -10   4   97.59    9.70
   6  10   5    4.80    1.40
  -6  10  -5    4.00    1.30
   6  10   5    6.10    1.10
  -6 -10  -5    4.80    1.40
   6  10   6  137.69   13.70
  -6  10  -6  149.88   13.70
   6 -10   6  145.59   13.60
  -6  10  -7   17.90    2.80
   6  10   7   24.40    3.30
  -6 -10  -7   21.60    2.90
   6 -10   7   24.50    3.30
   6  10   8  126.19   14.70
  -6 -10  -8  177.08   14.50
  -6  11  11   27.90    4.90
   6  11 -11   37.50    4.80
   6 -11 -11   44.40    4.70
  -6 -11  11   47.30    5.30
   6  11 -10    2.20    1.50
  -6  11  10    1.40    1.50
   6 -11 -10    4.80    1.30
  -6 -11  10    3.70    1.80
  -6  11   9   25.00    3.30
   6  11  -9   25.90    3.20
   6  11  -9   23.60    3.10
  -6 -11   9   27.30    3.60
   6 -11  -9   24.10    3.10
  -6  11   8    4.90    1.30
   6  11  -8    3.00    1.20
   6  11  -8    5.40    1.20
  -6 -11   8    4.60    1.60
   6 -11  -8    6.50    1.30
  -6  11   7   12.00    2.00
  -6  11   7   19.40    2.00
   6  11  -7   16.90    2.40
   6  11  -7   18.70    2.10
  -6 -11   7   15.00    2.50
   6 -11  -7   14.20    2.20
  -6  11   6   61.59    6.10
   6  11  -6   69.89    6.50
  -6  11   6   64.29    6.30
  -6 -11   6   65.59    6.50
   6  11  -5   41.30    3.90
  -6  11   5   36.60    4.10
  -6 -11   5   40.90    4.20
   6  11  -4  121.79   12.20
  -6  11   4  132.29   12.30
  -6 -11   4  143.19   12.30
   6 -11  -4  132.89   12.20
  -6  11   3  101.99   10.30
   6  11  -3  113.89   10.30
  -6 -11   3  116.69   10.30
   6  11  -2  274.97   22.10
  -6  11   2  219.68   22.00
  -6 -11   2  239.68   22.00
   6 -11  -2  263.47   22.00
   6 -11  -2  211.48   22.00
  -6  11   1    0.30    0.70
   6  11  -1    0.10    0.60
  -6 -11   1   -0.10    0.60
   6 -11  -1    0.40    0.60
   6 -11  -1    0.20    0.50
  -6 -11   1   -0.20    0.60
  -6  11   0  336.57   27.80
   6  11   0  316.57   27.80
   6 -11   0  307.57   27.60
  -6 -11   0  295.97   27.80
   6 -11   0  268.17   27.70
   6  11   1    6.50    1.20
  -6  11  -1    6.30    1.10
  -6 -11  -1    3.80    1.10
   6 -11   1    4.80    0.90
   6 -11   1    4.30    1.00
   6  11   2  401.36   30.20
   6  11   2  336.37   30.40
  -6  11  -2  289.37   30.30
   6 -11   2  342.67   30.40
  -6 -11  -2  294.77   30.40
  -6  11  -3    0.60    0.90
   6  11   3    1.40    1.00
   6 -11   3    0.20    0.60
  -6 -11  -3    0.00    1.00
   6 -11   3    0.60    0.90
  -6  11  -4   59.39    6.30
   6  11   4   66.39    6.50
  -6 -11  -4   59.99    6.60
   6 -11   4   75.09    6.00
   6 -11   4   55.49    6.30
   6  11   5   14.00    2.20
  -6  11  -5   13.70    2.10
   6 -11   5   14.20    2.20
  -6 -11  -5   13.90    2.20
   6  11   6   27.40    3.70
  -6  11  -6   28.10    3.50
  -6 -11  -6   22.20    3.40
   6 -11   6   22.80    3.40
   6  11   7    8.20    2.30
  -6  11  -7   11.40    2.00
   6 -11   7   12.80    2.20
  -6 -11  -7   12.10    2.20
  -6  11  -8   12.20    2.50
   6  11   8   10.60    2.70
   6 -11   8    7.50    2.30
  -6 -11  -8    6.70    2.20
   6  12 -11    4.30    2.10
  -6  12  11    3.80    2.20
   6 -12 -11    0.50    1.70
  -6 -12  11    3.40    2.20
   6  12 -10  131.49   13.00
   6  12 -10  138.19   12.90
  -6  12  10  127.49   13.10
  -6 -12  10  131.89   13.30
   6 -12 -10  158.58   13.10
  -6  12   9    0.10    1.40
   6  12  -9    1.30    1.30
   6  12  -9    2.40    1.20
  -6 -12   9    1.30    1.60
   6 -12  -9    0.90    1.20
   6  12  -8   78.69    7.30
  -6  12   8   68.89    7.50
  -6 -12   8   76.09    7.70
   6 -12  -8   80.99    7.50
   6  12  -7   -0.40    0.80
  -6  12   7    0.70    1.00
   6  12  -7    0.40    1.30
   6 -12  -7    0.30    0.90
  -6 -12   7    0.80    1.30
   6  12  -6   31.10    3.30
   6  12  -6   31.60    3.60
  -6  12   6   30.70    3.50
   6 -12  -6   28.30    3.40
  -6 -12   6   32.00    3.70
   6  12  -5    6.50    1.10
  -6  12   5    5.00    1.20
  -6 -12   5    4.70    1.20
   6 -12  -5    6.20    1.20
  -6  12   4  132.69   12.40
   6  12  -4  123.59   12.20
   6 -12  -4  130.09   12.20
  -6 -12   4  144.79   12.40
  -6  12   3   40.20    4.20
   6  12  -3   49.00    4.20
  -6 -12   3   40.70    4.10
   6 -12  -3   40.30    4.10
   6 -12  -3   36.80    4.00
  -6  12   2    7.80    1.50
   6  12  -2   10.90    1.60
   6 -12  -2   10.60    1.60
  -6 -12   2    8.70    1.30
  -6 -12   2   12.20    1.60
   6 -12  -2    8.70    1.30
  -6  12   1   48.60    4.90
  -6 -12   1   48.00    4.90
   6 -12  -1   44.90    4.70
   6 -12  -1   53.79    4.70
  -6 -12   1   47.00    4.60
  -6  12   0   67.39    6.00
   6  12   0   60.69    5.90
   6 -12   0   53.49    5.80
   6 -12   0   69.89    5.80
  -6 -12   0   49.60    5.90
   6  12   1   67.69    5.80
  -6  12  -1   51.09    5.70
   6 -12   1   48.60    5.60
   6 -12   1   66.39    5.60
   6  12   2   39.70    4.10
   6 -12   2   38.80    3.80
   6 -12   2   36.90    4.00
  -6 -12  -2   37.50    4.20
   6  12   3   39.60    3.90
  -6  12  -3   34.50    3.80
   6 -12   3   30.70    3.80
   6 -12   3   35.40    3.60
  -6 -12  -3   34.30    4.10
   6  12   4   83.99    8.90
  -6  12  -4  108.09    8.90
  -6 -12  -4   89.49    8.90
   6 -12   4   83.99    8.90
   6  12   5   20.40    3.10
  -6  12  -5   24.50    3.10
   6 -12   5   21.00    3.10
  -6 -12  -5   20.60    2.90
   6  12   6   74.29    7.60
  -6  12  -6   74.19    7.40
   6 -12   6   69.69    7.30
  -6 -12  -6   70.39    7.40
   6  12   7    2.10    2.00
  -6  12  -7    4.80    1.80
   6 -12   7    3.20    1.90
  -6 -12  -7   -0.10    1.80
  -6  13  10    8.60    2.30
   6  13 -10    6.20    2.10
   6 -13 -10   16.00    2.30
  -6 -13  10    7.30    2.50
  -6  13   9    7.40    1.90
   6  13  -9   10.80    1.80
   6  13  -9    7.70    1.80
   6 -13  -9    7.40    1.90
  -6 -13   9    8.80    2.20
  -6  13   8   11.00    1.90
   6  13  -8   11.40    1.90
   6  13  -8   10.70    1.70
  -6 -13   8   10.10    2.20
   6 -13  -8    8.80    1.80
   6  13  -7   33.10    4.00
  -6  13   7   31.00    3.90
  -6 -13   7   31.60    4.20
   6 -13  -7   37.60    3.80
   6  13  -6   74.09    7.20
   6  13  -6   75.49    7.40
   6 -13  -6   70.79    7.30
  -6 -13   6   79.99    7.50
   6  13  -5   37.70    3.70
   6 -13  -5   31.30    3.80
  -6 -13   5   36.00    3.90
  -6  13   4  177.78   18.40
   6  13  -4  198.08   18.30
   6 -13  -4  233.08   18.40
  -6 -13   4  191.08   18.30
  -6  13   3    3.20    1.10
   6  13  -3    5.10    1.10
   6 -13  -3    5.10    1.00
  -6 -13   3    3.70    1.10
  -6  13   2  200.88   19.50
   6  13  -2  219.88   19.50
   6 -13  -2  191.78   19.40
  -6 -13   2  222.58   19.60
  -6 -13   2  226.08   19.40
  -6  13   1   34.90    4.10
   6  13  -1   47.20    4.10
  -6 -13   1   37.30    4.10
   6 -13  -1   34.20    3.90
   6  13   0  205.08   18.40
   6 -13   0  195.48   18.30
  -6 -13   0  197.18   18.50
  -6  13  -1    8.90    1.60
   6 -13   1   12.80    1.90
   6 -13   1   11.80    1.50
  -6 -13  -1    9.60    1.70
   6  13   2  102.59    9.30
  -6  13  -2   91.79    9.30
  -6 -13  -2   95.39    9.40
   6 -13   2   98.19    9.10
   6 -13   2   98.19    9.30
   6  13   3    7.70    1.60
  -6  13  -3    6.40    1.50
   6 -13   3   10.10    1.70
   6 -13   3    9.80    1.40
  -6 -13  -3    8.90    1.90
  -6  13  -4   46.70    5.20
   6  13   4   52.89    5.30
   6 -13   4   46.70    5.20
  -6 -13  -4   48.10    5.40
  -6  13  -5    2.00    1.50
   6  13   5   -1.60    1.40
   6 -13   5    1.70    1.40
  -6 -13  -5    1.20    1.60
  -6  13  -6   21.30    3.00
   6  13   6   20.10    3.10
   6 -13   6   19.60    3.00
  -6 -13  -6   25.20    3.30
  -6  13  -7   14.00    2.70
  -6 -13  -7   14.40    2.80
   6  14  -9    0.50    1.60
  -6  14   9    3.70    1.70
   6  14  -9    2.80    1.70
  -6 -14   9    2.00    2.10
   6 -14  -9    4.60    1.80
   6  14  -8   32.30    3.90
  -6  14   8   33.40    4.20
   6  14  -8   31.40    4.20
   6 -14  -8   35.90    4.10
  -6  14   7    0.90    1.40
   6  14  -7   -0.80    1.10
   6  14  -7    0.70    1.40
   6 -14  -7    0.90    1.10
   6  14  -6   92.39    9.10
  -6  14   6   84.09    9.10
   6 -14  -6   96.19    9.20
  -6 -14   6  109.99    9.40
   6  14  -5    4.10    1.20
  -6  14   5    5.10    1.40
  -6 -14   5    5.70    1.60
   6 -14  -5    3.60    1.20
  -6  14   4    4.00    1.30
   6 -14  -4    5.80    1.30
  -6  14   3   19.80    2.80
   6 -14  -3   23.70    2.70
  -6  14   2   10.80    1.70
  -6 -14   2    9.20    1.70
   6 -14  -2    8.80    1.50
  -6  14   1   25.20    3.10
   6  14  -1   29.80    3.10
  -6 -14   1   18.70    3.10
   6  14   0    0.70    1.00
  -6  14   0   -0.80    1.00
   6 -14   0   -0.20    0.80
  -6 -14   0   -0.20    1.10
   6 -14   0    0.90    1.00
   6  14   1   33.90    3.60
  -6  14  -1   31.80    3.70
   6 -14   1   31.50    3.40
   6 -14   1   30.90    3.50
  -6 -14  -1   26.80    3.80
  -6  14  -2   42.70    5.10
   6  14   2   55.39    5.10
   6 -14   2   49.70    5.00
  -6 -14  -2   44.20    5.20
   6 -14   2   48.60    4.90
   6  14   3   29.90    4.00
  -6  14  -3   39.70    4.10
   6 -14   3   30.30    4.00
   6 -14   3   35.60    3.70
  -6 -14  -3   36.50    4.30
  -6  14  -4    4.00    1.50
   6  14   4    2.50    1.40
  -6 -14  -4    3.90    1.80
   6 -14   4    2.40    1.60
  -6  14  -5   13.60    2.20
   6  14   5    9.20    2.10
   6 -14   5   10.80    2.40
  -6 -14  -5   17.80    2.60
   6  14   6   68.89    7.50
  -6  14  -6   68.69    7.40
   6 -14   6   72.49    7.50
  -6 -14  -6   65.69    7.60
   6  15  -8   11.10    2.30
  -6  15   8   10.60    2.30
   6  15  -8    8.50    2.00
   6 -15  -8   16.20    2.30
   6  15  -7   49.40    5.60
  -6  15   7   60.69    5.60
   6  15  -7   45.80    5.30
   6 -15  -7   47.40    5.50
   6  15  -6   59.09    6.10
  -6  15   6   63.09    6.30
   6 -15  -6   58.79    6.20
  -6  15   5    9.40    1.80
   6  15  -5    5.50    1.50
   6 -15  -5    7.90    1.60
   6  15  -4  127.79   12.20
  -6  15   4  127.89   12.30
   6 -15  -4  134.39   12.20
  -6  15   3    4.90    1.50
   6  15  -3    4.20    1.30
   6 -15  -3    6.00    1.40
  -6  15   2  102.29    9.80
   6  15  -2   97.69    9.70
   6 -15  -2  101.89    9.70
  -6 -15   2  105.29    9.80
   6  15  -1    3.90    1.20
  -6  15   1    4.70    1.40
  -6 -15   1    2.70    1.40
   6 -15  -1    2.80    1.10
  -6  15   0  136.59   11.80
   6  15   0  135.59   11.70
   6 -15   0  108.69   11.50
  -6 -15   0  114.09   11.80
  -6  15  -1   -0.10    1.30
   6  15   1   -0.10    1.10
   6 -15   1   -0.40    1.10
  -6 -15  -1   -0.70    1.50
  -6  15  -2   73.89    6.70
   6  15   2   56.99    6.50
   6 -15   2   65.59    6.40
[truncated: 219,697 more chars]
