# Supplementary material for: Practical synthetic strategies towards lipophilic 6-iodotetrahydroquinolines and -dihydroquinolines
Source: Beilstein J Org Chem. 2016 Aug 16;12:1851–62. doi: 10.3762/bjoc.12.174 (PMC5082455; doi:10.3762/bjoc.12.174)
Supplement: File 2 — Crystallographic Information Files of compounds 13, 14, 15b, 19, 29, and 30. [file Beilstein_J_Org_Chem-12-1851-s002.zip › 14_ 1433619.cif]

data_ho1
_audit_creation_date              2015-11-16
_audit_creation_method
;
Olex2 1.2
(compiled 2015.09.30 svn.r3233 for OlexSys, GUI svn.r5103)
;
_shelxl_version_number            2014-3
_publ_contact_author_address      Chemistry Department, Durham University, South Road, Durham, DH1 3LE, UK
_publ_contact_author_email        andy.whiting@durham.ac.uk
_publ_contact_author_name         Andrew Whiting
_publ_contact_author_phone        ?
_publ_requested_journal           Beilstein J. Org. Chem.
_publ_section_references
;
Dolomanov, O.V., Bourhis, L.J., Gildea, R.J, Howard, J.A.K. & Puschmann, H.
 (2009), J. Appl. Cryst. 42, 339-341.

Sheldrick, G.M. (2015). Acta Cryst. A71, 3-8.

Sheldrick, G.M. (2015). Acta Cryst. C71, 3-8.
;
_chemical_name_common             ?
_chemical_name_systematic
6-Iodo-4,4,8-trimethyl-1,2,3,4-tetrahydroquinoline
_chemical_formula_moiety          'C12 H16 I N'
_chemical_formula_sum             'C12 H16 I N'
_chemical_formula_weight          301.16
_chemical_melting_point           ?
loop_
  _atom_type_symbol
  _atom_type_description
  _atom_type_scat_dispersion_real
  _atom_type_scat_dispersion_imag
  _atom_type_scat_source
 'C' 'C' 0.0033 0.0016 'International Tables Vol C Tables 4.2.6.8 and 6.1.1.4'
 'H' 'H' 0.0000 0.0000 'International Tables Vol C Tables 4.2.6.8 and 6.1.1.4'
 'I' 'I' -0.4742 1.8119 'International Tables Vol C Tables 4.2.6.8 and 6.1.1.4'
 'N' 'N' 0.0061 0.0033 'International Tables Vol C Tables 4.2.6.8 and 6.1.1.4'

_shelx_space_group_comment
;
The symmetry employed for this shelxl refinement is uniquely defined
by the following loop, which should always be used as a source of
symmetry information in preference to the above space-group names.
They are only intended as comments.
;
_space_group_crystal_system       'monoclinic'
_space_group_IT_number            14
_space_group_name_H-M_alt         'P 1 21/c 1'
_space_group_name_Hall            '-P 2ybc'
loop_
  _space_group_symop_operation_xyz
 'x, y, z'
 '-x, y+1/2, -z+1/2'
 '-x, -y, -z'
 'x, -y-1/2, z-1/2'

_cell_length_a                    18.0060(8)
_cell_length_b                    9.8997(4)
_cell_length_c                    13.7872(6)
_cell_angle_alpha                 90
_cell_angle_beta                  107.361(2)
_cell_angle_gamma                 90
_cell_volume                      2345.66(18)
_cell_formula_units_Z             8
_cell_measurement_reflns_used     9973
_cell_measurement_temperature     120
_cell_measurement_theta_max       31.488
_cell_measurement_theta_min       2.575
_shelx_estimated_absorpt_T_max    ?
_shelx_estimated_absorpt_T_min    ?
_exptl_absorpt_coefficient_mu     2.694
_exptl_absorpt_correction_T_max   1.0000
_exptl_absorpt_correction_T_min   0.9311
_exptl_absorpt_correction_type    multi-scan
_exptl_absorpt_process_details
;
SADABS-2014/4 (Bruker,2014) was used for absorption correction.
wR2(int) was 0.0462 before and 0.0371 after correction.
The Ratio of minimum to maximum transmission is 0.9311.
The \l/2 correction factor is 0.00150.
;
_exptl_crystal_colour             'clear colourless'
_exptl_crystal_colour_lustre      clear
_exptl_crystal_colour_primary     colourless
_exptl_crystal_density_diffrn     1.706
_exptl_crystal_density_meas       ?
_exptl_crystal_density_method     ?
_exptl_crystal_description        plate
_exptl_crystal_F_000              1184
_exptl_crystal_preparation        'Reduction of DC113'
_exptl_crystal_recrystallization_method
'The material was recrystallised from EtOAc by slow evaporation'
_exptl_crystal_size_max           0.266
_exptl_crystal_size_mid           0.165
_exptl_crystal_size_min           0.16
_exptl_special_details
;
 ?
;
_exptl_transmission_factor_max    ?
_exptl_transmission_factor_min    ?
_diffrn_reflns_av_R_equivalents   0.0311
_diffrn_reflns_av_unetI/netI      0.0196
_diffrn_reflns_Laue_measured_fraction_full 1.000
_diffrn_reflns_Laue_measured_fraction_max 1.000
_diffrn_reflns_limit_h_max        26
_diffrn_reflns_limit_h_min        -26
_diffrn_reflns_limit_k_max        14
_diffrn_reflns_limit_k_min        -14
_diffrn_reflns_limit_l_max        20
_diffrn_reflns_limit_l_min        -20
_diffrn_reflns_number             54918
_diffrn_reflns_point_group_measured_fraction_full 1.000
_diffrn_reflns_point_group_measured_fraction_max 1.000
_diffrn_reflns_theta_full         26.000
_diffrn_reflns_theta_max          31.571
_diffrn_reflns_theta_min          2.370
_diffrn_ambient_temperature       120
_diffrn_detector                  'Bruker APEX2 area detector'
_diffrn_detector_area_resol_mean  7.9
_diffrn_detector_type             'CCD area detector'
_diffrn_measured_fraction_theta_full 1.000
_diffrn_measured_fraction_theta_max 1.000
_diffrn_measurement_device        'three-circle diffractometer'
_diffrn_measurement_device_type   'Bruker SMART APEX2 area detector'
_diffrn_measurement_method        '\w and \f scans'
_diffrn_radiation_monochromator   'mirror optics'
_diffrn_radiation_probe           x-ray
_diffrn_radiation_type            MoK\a
_diffrn_radiation_wavelength      0.71073
_diffrn_source                    'microfocus sealed X-ray tube'
_diffrn_source_type               'Incoatec I\ms'
_diffrn_standards_number          0
_reflns_Friedel_coverage          0.000
_reflns_Friedel_fraction_full     .
_reflns_Friedel_fraction_max      .
_reflns_number_gt                 6697
_reflns_number_total              7857
_reflns_special_details
;
 Reflections were merged by SHELXL according to the crystal
 class for the calculation of statistics and refinement.
 
 _reflns_Friedel_fraction is defined as the number of unique
 Friedel pairs measured divided by the number that would be
 possible theoretically, ignoring centric projections and
 systematic absences.
;
_reflns_threshold_expression      'I > 2\s(I)'
_computing_cell_refinement        'SAINT v8.34A (Bruker, 2013)'
_computing_data_collection        ?
_computing_data_reduction         'SAINT v8.34A (Bruker, 2013)'
_computing_molecular_graphics     'Olex2 (Dolomanov et al., 2009)'
_computing_publication_material   'Olex2 (Dolomanov et al., 2009)'
_computing_structure_refinement   'ShelXL (Sheldrick, 2015)'
_computing_structure_solution     'ShelXT (Sheldrick, 2015)'
_refine_diff_density_max          1.717
_refine_diff_density_min          -2.798
_refine_diff_density_rms          0.109
_refine_ls_extinction_coef        .
_refine_ls_extinction_method      none
_refine_ls_goodness_of_fit_ref    1.082
_refine_ls_hydrogen_treatment     constr
_refine_ls_matrix_type            full
_refine_ls_number_parameters      259
_refine_ls_number_reflns          7857
_refine_ls_number_restraints      0
_refine_ls_R_factor_all           0.0374
_refine_ls_R_factor_gt            0.0279
_refine_ls_restrained_S_all       1.082
_refine_ls_shift/su_max           0.001
_refine_ls_shift/su_mean          0.000
_refine_ls_structure_factor_coef  Fsqd
_refine_ls_weighting_details
'w=1/[\s^2^(Fo^2^)+(0.0205P)^2^+3.5753P] where P=(Fo^2^+2Fc^2^)/3'
_refine_ls_weighting_scheme       calc
_refine_ls_wR_factor_gt           0.0590
_refine_ls_wR_factor_ref          0.0632
_refine_special_details
;
 ?
;
_olex2_refinement_description
;
1. Fixed Uiso
 At 1.2 times of:
  All C(H) groups, All C(H,H) groups, All N(H) groups
 At 1.5 times of:
  All C(H,H,H) groups
2.a Secondary CH2 refined with riding coordinates:
 C9(H9A,H9B), C10(H10A,H10B), C23(H23A,H23B), C24(H24A,H24B)
2.b Aromatic/amide H refined with riding coordinates:
 N8(H8), C3(H3), C5(H5), N22(H22), C17(H17), C19(H19)
2.c Idealised Me refined as rotating group:
 C7(H7A,H7B,H7C), C12(H12A,H12B,H12C), C13(H13A,H13B,H13C), C21(H21A,H21B,
 H21C), C26(H26A,H26B,H26C), C27(H27A,H27B,H27C)
;
_atom_sites_solution_hydrogens    geom
_atom_sites_solution_primary      ?
_atom_sites_solution_secondary    ?
loop_
  _atom_site_label
  _atom_site_type_symbol
  _atom_site_fract_x
  _atom_site_fract_y
  _atom_site_fract_z
  _atom_site_U_iso_or_equiv
  _atom_site_adp_type
  _atom_site_occupancy
  _atom_site_site_symmetry_order
  _atom_site_calc_flag
  _atom_site_refinement_flags_posn
  _atom_site_refinement_flags_adp
  _atom_site_refinement_flags_occupancy
  _atom_site_disorder_assembly
  _atom_site_disorder_group
 I14 I -0.02314(2) -0.08352(2) 0.23952(2) 0.02040(4) Uani 1 1 d . . . . .
 N8 N 0.06720(10) 0.35960(17) -0.02987(13) 0.0181(3) Uani 1 1 d . . . . .
 H8 H 0.0306 0.4151 -0.0644 0.022 Uiso 1 1 calc R . . . .
 C1 C 0.04897(11) 0.25672(18) 0.02706(13) 0.0134(3) Uani 1 1 d . . . . .
 C2 C 0.10732(10) 0.19266(18) 0.10500(13) 0.0127(3) Uani 1 1 d . . . . .
 C3 C 0.08542(11) 0.09480(18) 0.16411(14) 0.0147(3) Uani 1 1 d . . . . .
 H3 H 0.1241 0.0515 0.2173 0.018 Uiso 1 1 calc R . . . .
 C4 C 0.00806(11) 0.06015(18) 0.14624(14) 0.0143(3) Uani 1 1 d . . . . .
 C5 C -0.04928(11) 0.12079(19) 0.06815(14) 0.0150(3) Uani 1 1 d . . . . .
 H5 H -0.1021 0.0946 0.0553 0.018 Uiso 1 1 calc R . . . .
 C6 C -0.02972(10) 0.21958(18) 0.00881(13) 0.0139(3) Uani 1 1 d . . . . .
 C7 C -0.09192(12) 0.2876(2) -0.07521(16) 0.0223(4) Uani 1 1 d . . . . .
 H7A H -0.0914 0.3850 -0.0621 0.033 Uiso 1 1 calc GR . . . .
 H7B H -0.1429 0.2505 -0.0778 0.033 Uiso 1 1 calc GR . . . .
 H7C H -0.0819 0.2716 -0.1403 0.033 Uiso 1 1 calc GR . . . .
 C9 C 0.14631(13) 0.3760(2) -0.03275(16) 0.0241(4) Uani 1 1 d . . . . .
 H9A H 0.1527 0.4661 -0.0605 0.029 Uiso 1 1 calc R . . . .
 H9B H 0.1585 0.3064 -0.0772 0.029 Uiso 1 1 calc R . . . .
 C10 C 0.20090(12) 0.3622(2) 0.07435(16) 0.0222(4) Uani 1 1 d . . . . .
 H10A H 0.1898 0.4353 0.1171 0.027 Uiso 1 1 calc R . . . .
 H10B H 0.2552 0.3734 0.0728 0.027 Uiso 1 1 calc R . . . .
 C11 C 0.19310(11) 0.22526(19) 0.12261(15) 0.0172(3) Uani 1 1 d . . . . .
 C12 C 0.22931(14) 0.1132(2) 0.0744(2) 0.0332(5) Uani 1 1 d . . . . .
 H12A H 0.2229 0.0261 0.1047 0.050 Uiso 1 1 calc GR . . . .
 H12B H 0.2848 0.1317 0.0868 0.050 Uiso 1 1 calc GR . . . .
 H12C H 0.2033 0.1104 0.0011 0.050 Uiso 1 1 calc GR . . . .
 C13 C 0.23779(13) 0.2347(2) 0.23587(17) 0.0269(5) Uani 1 1 d . . . . .
 H13A H 0.2115 0.2986 0.2689 0.040 Uiso 1 1 calc GR . . . .
 H13B H 0.2909 0.2661 0.2439 0.040 Uiso 1 1 calc GR . . . .
 H13C H 0.2396 0.1455 0.2673 0.040 Uiso 1 1 calc GR . . . .
 I28 I 0.49778(2) 0.59738(2) 0.75627(2) 0.03775(5) Uani 1 1 d . . . . .
 N22 N 0.57443(11) 0.15567(18) 0.47614(14) 0.0222(4) Uani 1 1 d . . . . .
 H22 H 0.5365 0.1009 0.4441 0.027 Uiso 1 1 calc R . . . .
 C15 C 0.55808(11) 0.25724(19) 0.53518(14) 0.0152(3) Uani 1 1 d . . . . .
 C16 C 0.61881(11) 0.32284(18) 0.60920(13) 0.0138(3) Uani 1 1 d . . . . .
 C17 C 0.60052(12) 0.42234(19) 0.66966(14) 0.0169(3) Uani 1 1 d . . . . .
 H17 H 0.6410 0.4679 0.7191 0.020 Uiso 1 1 calc R . . . .
 C18 C 0.52367(13) 0.4553(2) 0.65816(15) 0.0202(4) Uani 1 1 d . . . . .
 C19 C 0.46394(12) 0.3918(2) 0.58537(16) 0.0223(4) Uani 1 1 d . . . . .
 H19 H 0.4115 0.4166 0.5775 0.027 Uiso 1 1 calc R . . . .
 C20 C 0.48018(11) 0.2924(2) 0.52392(15) 0.0188(4) Uani 1 1 d . . . . .
 C21 C 0.41516(13) 0.2196(3) 0.44741(19) 0.0329(5) Uani 1 1 d . . . . .
 H21A H 0.4205 0.2320 0.3793 0.049 Uiso 1 1 calc GR . . . .
 H21B H 0.3651 0.2563 0.4493 0.049 Uiso 1 1 calc GR . . . .
 H21C H 0.4176 0.1231 0.4638 0.049 Uiso 1 1 calc GR . . . .
 C23 C 0.65088(15) 0.1347(3) 0.46430(19) 0.0306(5) Uani 1 1 d . . . . .
 H23A H 0.6464 0.1314 0.3910 0.037 Uiso 1 1 calc R . . . .
 H23B H 0.6716 0.0467 0.4947 0.037 Uiso 1 1 calc R . . . .
 C24 C 0.70730(13) 0.2465(2) 0.51476(18) 0.0269(5) Uani 1 1 d . . . . .
 H24A H 0.6955 0.3288 0.4721 0.032 Uiso 1 1 calc R . . . .
 H24B H 0.7611 0.2181 0.5199 0.032 Uiso 1 1 calc R . . . .
 C25 C 0.70195(11) 0.27930(19) 0.62150(15) 0.0170(3) Uani 1 1 d . . . . .
 C26 C 0.76159(13) 0.3896(2) 0.66744(18) 0.0285(5) Uani 1 1 d . . . . .
 H26A H 0.7482 0.4720 0.6265 0.043 Uiso 1 1 calc GR . . . .
 H26B H 0.8135 0.3590 0.6682 0.043 Uiso 1 1 calc GR . . . .
 H26C H 0.7613 0.4085 0.7371 0.043 Uiso 1 1 calc GR . . . .
 C27 C 0.72108(14) 0.1545(2) 0.6901(2) 0.0318(5) Uani 1 1 d . . . . .
 H27A H 0.7211 0.1790 0.7590 0.048 Uiso 1 1 calc GR . . . .
 H27B H 0.7725 0.1201 0.6920 0.048 Uiso 1 1 calc GR . . . .
 H27C H 0.6818 0.0845 0.6633 0.048 Uiso 1 1 calc GR . . . .

loop_
  _atom_site_aniso_label
  _atom_site_aniso_U_11
  _atom_site_aniso_U_22
  _atom_site_aniso_U_33
  _atom_site_aniso_U_23
  _atom_site_aniso_U_13
  _atom_site_aniso_U_12
 I14 0.02909(7) 0.01626(6) 0.01855(6) 0.00096(4) 0.01121(5) -0.00513(5)
 N8 0.0195(8) 0.0172(7) 0.0168(8) 0.0054(6) 0.0041(6) -0.0014(6)
 C1 0.0165(8) 0.0119(7) 0.0122(7) -0.0011(6) 0.0052(6) 0.0003(6)
 C2 0.0131(8) 0.0121(7) 0.0131(8) -0.0019(6) 0.0040(6) 0.0003(6)
 C3 0.0169(8) 0.0126(8) 0.0139(8) 0.0000(6) 0.0034(6) 0.0009(6)
 C4 0.0190(9) 0.0118(7) 0.0135(8) -0.0005(6) 0.0070(7) -0.0026(6)
 C5 0.0129(8) 0.0158(8) 0.0167(8) -0.0033(6) 0.0053(6) -0.0010(6)
 C6 0.0141(8) 0.0150(8) 0.0124(7) -0.0012(6) 0.0035(6) 0.0016(6)
 C7 0.0166(9) 0.0267(11) 0.0210(9) 0.0043(8) 0.0019(7) 0.0056(8)
 C9 0.0237(10) 0.0286(11) 0.0217(10) 0.0039(8) 0.0093(8) -0.0075(8)
 C10 0.0184(9) 0.0214(9) 0.0259(10) 0.0025(8) 0.0051(8) -0.0069(7)
 C11 0.0122(8) 0.0161(8) 0.0223(9) -0.0004(7) 0.0035(7) -0.0008(6)
 C12 0.0228(11) 0.0282(12) 0.0544(16) -0.0085(11) 0.0203(11) 0.0015(9)
 C13 0.0188(9) 0.0267(11) 0.0281(11) 0.0043(8) -0.0039(8) -0.0046(8)
 I28 0.06648(12) 0.02753(8) 0.02984(8) 0.00707(6) 0.03053(8) 0.02500(8)
 N22 0.0231(9) 0.0214(8) 0.0213(8) -0.0086(7) 0.0053(7) -0.0028(7)
 C15 0.0177(9) 0.0151(8) 0.0128(8) 0.0008(6) 0.0047(7) -0.0006(7)
 C16 0.0156(8) 0.0131(8) 0.0126(8) 0.0019(6) 0.0041(6) 0.0015(6)
 C17 0.0243(9) 0.0133(8) 0.0138(8) 0.0012(6) 0.0066(7) 0.0018(7)
 C18 0.0290(10) 0.0163(9) 0.0202(9) 0.0056(7) 0.0146(8) 0.0086(7)
 C19 0.0181(9) 0.0260(10) 0.0258(10) 0.0104(8) 0.0111(8) 0.0076(8)
 C20 0.0132(8) 0.0235(10) 0.0181(9) 0.0055(7) 0.0025(7) -0.0002(7)
 C21 0.0190(10) 0.0448(15) 0.0294(12) 0.0035(10) -0.0015(9) -0.0093(10)
 C23 0.0338(12) 0.0297(11) 0.0342(12) -0.0150(10) 0.0192(10) -0.0038(9)
 C24 0.0246(11) 0.0279(11) 0.0337(12) -0.0057(9) 0.0172(9) -0.0036(9)
 C25 0.0145(8) 0.0172(8) 0.0192(9) 0.0016(7) 0.0048(7) 0.0010(7)
 C26 0.0218(10) 0.0329(12) 0.0302(11) -0.0018(9) 0.0067(9) -0.0089(9)
 C27 0.0214(11) 0.0293(12) 0.0439(14) 0.0148(10) 0.0084(10) 0.0088(9)

_geom_special_details
;
 All esds (except the esd in the dihedral angle between two l.s. planes)
 are estimated using the full covariance matrix.  The cell esds are taken
 into account individually in the estimation of esds in distances, angles
 and torsion angles; correlations between esds in cell parameters are only
 used when they are defined by crystal symmetry.  An approximate (isotropic)
 treatment of cell esds is used for estimating esds involving l.s. planes.
;
loop_
  _geom_bond_atom_site_label_1
  _geom_bond_atom_site_label_2
  _geom_bond_distance
  _geom_bond_site_symmetry_2
  _geom_bond_publ_flag
 I14 C4 2.1032(18) . ?
 N8 H8 0.8800 . ?
 N8 C1 1.384(2) . ?
 N8 C9 1.446(3) . ?
 C1 C2 1.410(2) . ?
 C1 C6 1.412(3) . ?
 C2 C3 1.396(2) . ?
 C2 C11 1.525(3) . ?
 C3 H3 0.9500 . ?
 C3 C4 1.383(3) . ?
 C4 C5 1.386(3) . ?
 C5 H5 0.9500 . ?
 C5 C6 1.386(3) . ?
 C6 C7 1.508(3) . ?
 C7 H7A 0.9800 . ?
 C7 H7B 0.9800 . ?
 C7 H7C 0.9800 . ?
 C9 H9A 0.9900 . ?
 C9 H9B 0.9900 . ?
 C9 C10 1.516(3) . ?
 C10 H10A 0.9900 . ?
 C10 H10B 0.9900 . ?
 C10 C11 1.535(3) . ?
 C11 C12 1.534(3) . ?
 C11 C13 1.531(3) . ?
 C12 H12A 0.9800 . ?
 C12 H12B 0.9800 . ?
 C12 H12C 0.9800 . ?
 C13 H13A 0.9800 . ?
 C13 H13B 0.9800 . ?
 C13 H13C 0.9800 . ?
 I28 C18 2.098(2) . ?
 N22 H22 0.8800 . ?
 N22 C15 1.380(2) . ?
 N22 C23 1.449(3) . ?
 C15 C16 1.412(3) . ?
 C15 C20 1.408(3) . ?
 C16 C17 1.392(3) . ?
 C16 C25 1.518(3) . ?
 C17 H17 0.9500 . ?
 C17 C18 1.384(3) . ?
 C18 C19 1.384(3) . ?
 C19 H19 0.9500 . ?
 C19 C20 1.386(3) . ?
 C20 C21 1.505(3) . ?
 C21 H21A 0.9800 . ?
 C21 H21B 0.9800 . ?
 C21 H21C 0.9800 . ?
 C23 H23A 0.9900 . ?
 C23 H23B 0.9900 . ?
 C23 C24 1.523(3) . ?
 C24 H24A 0.9900 . ?
 C24 H24B 0.9900 . ?
 C24 C25 1.538(3) . ?
 C25 C26 1.530(3) . ?
 C25 C27 1.532(3) . ?
 C26 H26A 0.9800 . ?
 C26 H26B 0.9800 . ?
 C26 H26C 0.9800 . ?
 C27 H27A 0.9800 . ?
 C27 H27B 0.9800 . ?
 C27 H27C 0.9800 . ?

loop_
  _geom_angle_atom_site_label_1
  _geom_angle_atom_site_label_2
  _geom_angle_atom_site_label_3
  _geom_angle
  _geom_angle_site_symmetry_1
  _geom_angle_site_symmetry_3
  _geom_angle_publ_flag
 C1 N8 H8 120.0 . . ?
 C1 N8 C9 120.05(17) . . ?
 C9 N8 H8 120.0 . . ?
 N8 C1 C2 120.97(17) . . ?
 N8 C1 C6 119.07(17) . . ?
 C2 C1 C6 119.92(16) . . ?
 C1 C2 C11 121.02(16) . . ?
 C3 C2 C1 118.74(16) . . ?
 C3 C2 C11 120.20(16) . . ?
 C2 C3 H3 119.6 . . ?
 C4 C3 C2 120.85(17) . . ?
 C4 C3 H3 119.6 . . ?
 C3 C4 I14 119.82(14) . . ?
 C3 C4 C5 120.52(17) . . ?
 C5 C4 I14 119.66(14) . . ?
 C4 C5 H5 119.9 . . ?
 C6 C5 C4 120.15(17) . . ?
 C6 C5 H5 119.9 . . ?
 C1 C6 C7 119.75(17) . . ?
 C5 C6 C1 119.78(17) . . ?
 C5 C6 C7 120.46(17) . . ?
 C6 C7 H7A 109.5 . . ?
 C6 C7 H7B 109.5 . . ?
 C6 C7 H7C 109.5 . . ?
 H7A C7 H7B 109.5 . . ?
 H7A C7 H7C 109.5 . . ?
 H7B C7 H7C 109.5 . . ?
 N8 C9 H9A 109.9 . . ?
 N8 C9 H9B 109.9 . . ?
 N8 C9 C10 108.72(17) . . ?
 H9A C9 H9B 108.3 . . ?
 C10 C9 H9A 109.9 . . ?
 C10 C9 H9B 109.9 . . ?
 C9 C10 H10A 109.1 . . ?
 C9 C10 H10B 109.1 . . ?
 C9 C10 C11 112.66(17) . . ?
 H10A C10 H10B 107.8 . . ?
 C11 C10 H10A 109.1 . . ?
 C11 C10 H10B 109.1 . . ?
 C2 C11 C10 109.71(16) . . ?
 C2 C11 C12 108.61(16) . . ?
 C2 C11 C13 111.99(16) . . ?
 C12 C11 C10 110.19(18) . . ?
 C13 C11 C10 107.44(17) . . ?
 C13 C11 C12 108.89(19) . . ?
 C11 C12 H12A 109.5 . . ?
 C11 C12 H12B 109.5 . . ?
 C11 C12 H12C 109.5 . . ?
 H12A C12 H12B 109.5 . . ?
 H12A C12 H12C 109.5 . . ?
 H12B C12 H12C 109.5 . . ?
 C11 C13 H13A 109.5 . . ?
 C11 C13 H13B 109.5 . . ?
 C11 C13 H13C 109.5 . . ?
 H13A C13 H13B 109.5 . . ?
 H13A C13 H13C 109.5 . . ?
 H13B C13 H13C 109.5 . . ?
 C15 N22 H22 118.4 . . ?
 C15 N22 C23 123.24(17) . . ?
 C23 N22 H22 118.4 . . ?
 N22 C15 C16 120.41(17) . . ?
 N22 C15 C20 119.73(18) . . ?
 C20 C15 C16 119.83(17) . . ?
 C15 C16 C25 118.39(16) . . ?
 C17 C16 C15 119.19(17) . . ?
 C17 C16 C25 122.40(17) . . ?
 C16 C17 H17 119.8 . . ?
 C18 C17 C16 120.35(19) . . ?
 C18 C17 H17 119.8 . . ?
 C17 C18 I28 119.41(16) . . ?
 C19 C18 I28 119.87(15) . . ?
 C19 C18 C17 120.68(18) . . ?
 C18 C19 H19 119.8 . . ?
 C18 C19 C20 120.40(18) . . ?
 C20 C19 H19 119.8 . . ?
 C15 C20 C21 120.0(2) . . ?
 C19 C20 C15 119.54(18) . . ?
 C19 C20 C21 120.44(19) . . ?
 C20 C21 H21A 109.5 . . ?
 C20 C21 H21B 109.5 . . ?
 C20 C21 H21C 109.5 . . ?
 H21A C21 H21B 109.5 . . ?
 H21A C21 H21C 109.5 . . ?
 H21B C21 H21C 109.5 . . ?
 N22 C23 H23A 109.3 . . ?
 N22 C23 H23B 109.3 . . ?
 N22 C23 C24 111.79(18) . . ?
 H23A C23 H23B 107.9 . . ?
 C24 C23 H23A 109.3 . . ?
 C24 C23 H23B 109.3 . . ?
 C23 C24 H24A 109.3 . . ?
 C23 C24 H24B 109.3 . . ?
 C23 C24 C25 111.52(18) . . ?
 H24A C24 H24B 108.0 . . ?
 C25 C24 H24A 109.3 . . ?
 C25 C24 H24B 109.3 . . ?
 C16 C25 C24 107.12(16) . . ?
 C16 C25 C26 112.99(17) . . ?
 C16 C25 C27 109.30(16) . . ?
 C26 C25 C24 108.08(17) . . ?
 C26 C25 C27 108.63(18) . . ?
 C27 C25 C24 110.72(18) . . ?
 C25 C26 H26A 109.5 . . ?
 C25 C26 H26B 109.5 . . ?
 C25 C26 H26C 109.5 . . ?
 H26A C26 H26B 109.5 . . ?
 H26A C26 H26C 109.5 . . ?
 H26B C26 H26C 109.5 . . ?
 C25 C27 H27A 109.5 . . ?
 C25 C27 H27B 109.5 . . ?
 C25 C27 H27C 109.5 . . ?
 H27A C27 H27B 109.5 . . ?
 H27A C27 H27C 109.5 . . ?
 H27B C27 H27C 109.5 . . ?

loop_
  _geom_torsion_atom_site_label_1
  _geom_torsion_atom_site_label_2
  _geom_torsion_atom_site_label_3
  _geom_torsion_atom_site_label_4
  _geom_torsion
  _geom_torsion_site_symmetry_1
  _geom_torsion_site_symmetry_2
  _geom_torsion_site_symmetry_3
  _geom_torsion_site_symmetry_4
  _geom_torsion_publ_flag
 I14 C4 C5 C6 177.38(13) . . . . ?
 N8 C1 C2 C3 176.36(17) . . . . ?
 N8 C1 C2 C11 -5.8(3) . . . . ?
 N8 C1 C6 C5 -177.20(17) . . . . ?
 N8 C1 C6 C7 2.9(3) . . . . ?
 N8 C9 C10 C11 58.8(2) . . . . ?
 C1 N8 C9 C10 -44.5(3) . . . . ?
 C1 C2 C3 C4 0.6(3) . . . . ?
 C1 C2 C11 C10 20.1(2) . . . . ?
 C1 C2 C11 C12 -100.4(2) . . . . ?
 C1 C2 C11 C13 139.27(18) . . . . ?
 C2 C1 C6 C5 0.4(3) . . . . ?
 C2 C1 C6 C7 -179.52(17) . . . . ?
 C2 C3 C4 I14 -178.20(13) . . . . ?
 C2 C3 C4 C5 0.9(3) . . . . ?
 C3 C2 C11 C10 -162.12(17) . . . . ?
 C3 C2 C11 C12 77.4(2) . . . . ?
 C3 C2 C11 C13 -42.9(2) . . . . ?
 C3 C4 C5 C6 -1.7(3) . . . . ?
 C4 C5 C6 C1 1.0(3) . . . . ?
 C4 C5 C6 C7 -179.02(17) . . . . ?
 C6 C1 C2 C3 -1.2(3) . . . . ?
 C6 C1 C2 C11 176.62(16) . . . . ?
 C9 N8 C1 C2 18.8(3) . . . . ?
 C9 N8 C1 C6 -163.55(18) . . . . ?
 C9 C10 C11 C2 -46.5(2) . . . . ?
 C9 C10 C11 C12 73.0(2) . . . . ?
 C9 C10 C11 C13 -168.52(18) . . . . ?
 C11 C2 C3 C4 -177.29(17) . . . . ?
 I28 C18 C19 C20 -176.38(15) . . . . ?
 N22 C15 C16 C17 -178.20(17) . . . . ?
 N22 C15 C16 C25 0.3(3) . . . . ?
 N22 C15 C20 C19 178.18(18) . . . . ?
 N22 C15 C20 C21 -0.3(3) . . . . ?
 N22 C23 C24 C25 45.3(3) . . . . ?
 C15 N22 C23 C24 -6.3(3) . . . . ?
 C15 C16 C17 C18 0.8(3) . . . . ?
 C15 C16 C25 C24 36.8(2) . . . . ?
 C15 C16 C25 C26 155.76(18) . . . . ?
 C15 C16 C25 C27 -83.2(2) . . . . ?
 C16 C15 C20 C19 0.4(3) . . . . ?
 C16 C15 C20 C21 -178.04(19) . . . . ?
 C16 C17 C18 I28 176.36(14) . . . . ?
 C16 C17 C18 C19 -1.2(3) . . . . ?
 C17 C16 C25 C24 -144.68(18) . . . . ?
 C17 C16 C25 C26 -25.8(3) . . . . ?
 C17 C16 C25 C27 95.3(2) . . . . ?
 C17 C18 C19 C20 1.1(3) . . . . ?
 C18 C19 C20 C15 -0.7(3) . . . . ?
 C18 C19 C20 C21 177.7(2) . . . . ?
 C20 C15 C16 C17 -0.4(3) . . . . ?
 C20 C15 C16 C25 178.09(17) . . . . ?
 C23 N22 C15 C16 -17.7(3) . . . . ?
 C23 N22 C15 C20 164.5(2) . . . . ?
 C23 C24 C25 C16 -59.3(2) . . . . ?
 C23 C24 C25 C26 178.67(19) . . . . ?
 C23 C24 C25 C27 59.8(2) . . . . ?
 C25 C16 C17 C18 -177.65(17) . . . . ?

_shelx_res_file
;
TITL ho1_a.res in P2(1)/c
REM Old TITL HO1 in P21/c #14
REM SHELXT solution in P2(1)/c
REM R1 0.196, Rweak 0.003, Alpha 0.040, Orientation as input
REM Formula found by SHELXT: C25 N I2
CELL 0.71073 18.006 9.8997 13.7872 90 107.361 90
ZERR 8 0.0008 0.0004 0.0006 0 0.002 0
LATT 1
SYMM -X,0.5+Y,0.5-Z
SFAC C H I N
UNIT 96 128 8 8

L.S. 10
PLAN  20
TEMP -153.15
BOND $H
LIST 6
MORE -1
CONF
fmap 2
acta 52
REM <olex2.extras>
REM <HklSrc "%./HO1.hkl">
REM </olex2.extras>

WGHT    0.020500    3.575300
FVAR       0.22255
I14   3   -0.023142   -0.083515    0.239519    11.00000    0.02909    0.01626 =
         0.01855    0.00096    0.01121   -0.00513
N8    4    0.067198    0.359599   -0.029874    11.00000    0.01949    0.01717 =
         0.01684    0.00537    0.00407   -0.00137
AFIX  43
H8    2    0.030616    0.415051   -0.064361    11.00000   -1.20000
AFIX   0
C1    1    0.048970    0.256722    0.027064    11.00000    0.01653    0.01194 =
         0.01223   -0.00107    0.00518    0.00030
C2    1    0.107324    0.192664    0.105004    11.00000    0.01307    0.01210 =
         0.01308   -0.00187    0.00401    0.00026
C3    1    0.085417    0.094804    0.164114    11.00000    0.01686    0.01257 =
         0.01388   -0.00003    0.00342    0.00089
AFIX  43
H3    2    0.124138    0.051469    0.217283    11.00000   -1.20000
AFIX   0
C4    1    0.008058    0.060148    0.146244    11.00000    0.01904    0.01179 =
         0.01347   -0.00045    0.00702   -0.00262
C5    1   -0.049282    0.120791    0.068149    11.00000    0.01292    0.01578 =
         0.01674   -0.00328    0.00529   -0.00098
AFIX  43
H5    2   -0.102099    0.094588    0.055275    11.00000   -1.20000
AFIX   0
C6    1   -0.029719    0.219576    0.008807    11.00000    0.01410    0.01495 =
         0.01239   -0.00120    0.00355    0.00164
C7    1   -0.091919    0.287603   -0.075214    11.00000    0.01663    0.02675 =
         0.02101    0.00432    0.00193    0.00558
AFIX 137
H7A   2   -0.091379    0.384953   -0.062126    11.00000   -1.50000
H7B   2   -0.142923    0.250462   -0.077792    11.00000   -1.50000
H7C   2   -0.081863    0.271588   -0.140311    11.00000   -1.50000
AFIX   0
C9    1    0.146308    0.376047   -0.032745    11.00000    0.02375    0.02858 =
         0.02170    0.00395    0.00933   -0.00750
AFIX  23
H9A   2    0.152708    0.466073   -0.060482    11.00000   -1.20000
H9B   2    0.158511    0.306415   -0.077232    11.00000   -1.20000
AFIX   0
C10   1    0.200902    0.362207    0.074349    11.00000    0.01839    0.02139 =
         0.02587    0.00255    0.00512   -0.00692
AFIX  23
H10A  2    0.189845    0.435267    0.117094    11.00000   -1.20000
H10B  2    0.255180    0.373394    0.072830    11.00000   -1.20000
AFIX   0
C11   1    0.193102    0.225259    0.122610    11.00000    0.01220    0.01613 =
         0.02226   -0.00045    0.00355   -0.00084
C12   1    0.229311    0.113218    0.074449    11.00000    0.02283    0.02820 =
         0.05443   -0.00850    0.02029    0.00154
AFIX 137
H12A  2    0.222928    0.026054    0.104703    11.00000   -1.50000
H12B  2    0.284838    0.131666    0.086793    11.00000   -1.50000
H12C  2    0.203293    0.110377    0.001092    11.00000   -1.50000
AFIX   0
C13   1    0.237794    0.234745    0.235872    11.00000    0.01878    0.02670 =
         0.02805    0.00428   -0.00387   -0.00462
AFIX 137
H13A  2    0.211479    0.298642    0.268878    11.00000   -1.50000
H13B  2    0.290916    0.266143    0.243941    11.00000   -1.50000
H13C  2    0.239588    0.145523    0.267281    11.00000   -1.50000
AFIX   0

I28   3    0.497779    0.597377    0.756272    11.00000    0.06648    0.02753 =
         0.02984    0.00707    0.03053    0.02500
N22   4    0.574428    0.155667    0.476139    11.00000    0.02313    0.02137 =
         0.02134   -0.00864    0.00528   -0.00276
AFIX  43
H22   2    0.536545    0.100923    0.444085    11.00000   -1.20000
AFIX   0
C15   1    0.558078    0.257245    0.535180    11.00000    0.01772    0.01505 =
         0.01280    0.00078    0.00467   -0.00060
C16   1    0.618811    0.322839    0.609201    11.00000    0.01559    0.01308 =
         0.01258    0.00192    0.00406    0.00153
C17   1    0.600518    0.422344    0.669664    11.00000    0.02435    0.01327 =
         0.01377    0.00119    0.00658    0.00176
AFIX  43
H17   2    0.641003    0.467876    0.719091    11.00000   -1.20000
AFIX   0
C18   1    0.523670    0.455299    0.658158    11.00000    0.02901    0.01627 =
         0.02021    0.00559    0.01458    0.00858
C19   1    0.463943    0.391818    0.585366    11.00000    0.01810    0.02597 =
         0.02576    0.01039    0.01107    0.00759
AFIX  43
H19   2    0.411489    0.416560    0.577465    11.00000   -1.20000
AFIX   0
C20   1    0.480182    0.292366    0.523919    11.00000    0.01320    0.02348 =
         0.01813    0.00554    0.00247   -0.00020
C21   1    0.415156    0.219594    0.447410    11.00000    0.01896    0.04476 =
         0.02937    0.00350   -0.00152   -0.00931
AFIX 137
H21A  2    0.420508    0.231984    0.379291    11.00000   -1.50000
H21B  2    0.365068    0.256347    0.449292    11.00000   -1.50000
H21C  2    0.417554    0.123070    0.463835    11.00000   -1.50000
AFIX   0
C23   1    0.650875    0.134677    0.464303    11.00000    0.03375    0.02967 =
         0.03415   -0.01504    0.01915   -0.00384
AFIX  23
H23A  2    0.646449    0.131353    0.391025    11.00000   -1.20000
H23B  2    0.671628    0.046710    0.494690    11.00000   -1.20000
AFIX   0
C24   1    0.707301    0.246477    0.514757    11.00000    0.02462    0.02791 =
         0.03370   -0.00573    0.01717   -0.00358
AFIX  23
H24A  2    0.695484    0.328765    0.472101    11.00000   -1.20000
H24B  2    0.761054    0.218058    0.519881    11.00000   -1.20000
AFIX   0
C25   1    0.701951    0.279305    0.621495    11.00000    0.01449    0.01715 =
         0.01916    0.00159    0.00477    0.00098
C26   1    0.761593    0.389605    0.667437    11.00000    0.02176    0.03293 =
         0.03020   -0.00181    0.00667   -0.00886
AFIX 137
H26A  2    0.748184    0.471954    0.626479    11.00000   -1.50000
H26B  2    0.813520    0.359008    0.668171    11.00000   -1.50000
H26C  2    0.761279    0.408504    0.737086    11.00000   -1.50000
AFIX   0
C27   1    0.721076    0.154490    0.690109    11.00000    0.02142    0.02926 =
         0.04387    0.01475    0.00841    0.00882
AFIX 137
H27A  2    0.721100    0.179043    0.758977    11.00000   -1.50000
H27B  2    0.772522    0.120085    0.691997    11.00000   -1.50000
H27C  2    0.681843    0.084479    0.663254    11.00000   -1.50000
AFIX   0
HKLF 4

REM  ho1_a.res in P2(1)/c
REM R1 =  0.0279 for    6697 Fo > 4sig(Fo)  and  0.0374 for all    7857 data
REM    259 parameters refined using      0 restraints

END

WGHT      0.0205      3.5756

REM Highest difference peak  1.717,  deepest hole -2.798,  1-sigma level  0.109
Q1    1   0.4659  0.5641  0.7289  11.00000  0.05    1.72
Q2    1   0.0116 -0.1032  0.2560  11.00000  0.05    1.44
Q3    1   0.6971  0.1244  0.5698  11.00000  0.05    0.53
Q4    1   0.1942  0.2946  0.0958  11.00000  0.05    0.45
Q5    1   0.5616  0.4266  0.6723  11.00000  0.05    0.43
Q6    1   0.0941  0.1559  0.1354  11.00000  0.05    0.42
Q7    1   0.0277  0.3692 -0.0941  11.00000  0.05    0.42
Q8    1  -0.0531  0.2409 -0.0298  11.00000  0.05    0.41
Q9    1   0.6113  0.3720  0.6368  11.00000  0.05    0.40
Q10   1   0.1547  0.2208  0.1194  11.00000  0.05    0.38
Q11   1   0.7383  0.3726  0.5768  11.00000  0.05    0.37
Q12   1   0.5313  0.1418  0.4162  11.00000  0.05    0.37
Q13   1   0.5947  0.2864  0.5761  11.00000  0.05    0.35
Q14   1  -0.0870  0.1701 -0.2524  11.00000  0.05    0.35
Q15   1   0.7333  0.2351  0.7341  11.00000  0.05    0.35
Q16   1   0.0327 -0.1861  0.2069  11.00000  0.05    0.35
Q17   1   0.4817  0.3327  0.5676  11.00000  0.05    0.34
Q18   1  -0.0190  0.1103  0.1091  11.00000  0.05    0.34
Q19   1   0.5171  0.2759  0.5253  11.00000  0.05    0.34
Q20   1   0.4467  0.2553  0.4834  11.00000  0.05    0.34
;
_shelx_res_checksum               70392
_shelx_hkl_file
;
   0   0  -2 1567.34   37.10
   0   0   2 1519.25   37.00
   0   0   2 1598.84   37.10
   0   0  -2 1576.74   37.00
   0   0  -3   -3.30    0.50
   0   0  -3   -4.70    0.40
   0   0   3   -4.30    0.40
   0   0   3   -3.00    0.50
   0   0   3   -3.00    0.20
   0   0  -3   -2.90    0.30
   0   0  -4 5849.41  145.19
   0   0   4 5832.52  145.49
   0   0  -4 5677.53  145.29
   0   0   4 5803.02  145.79
   0   0  -5   -1.70    0.30
   0   0   5   -1.90    0.60
   0   0  -5   -1.70    0.70
   0   0  -5   -1.30    0.60
   0   0   5   -2.40    0.60
   0   0   5   -1.10    0.70
   0   0  -5   -0.90    0.70
   0   0   6 3242.28   75.49
   0   0  -6 3305.97   75.49
   0   0  -6 3059.89   75.09
   0   0  -6 3172.18   75.59
   0   0   6 3269.47   75.19
   0   0   6 2919.41   75.39
   0   0   7    0.10    1.00
   0   0   7   -1.10    0.90
   0   0  -7    0.10    1.00
   0   0  -7    2.70    1.10
   0   0  -7   -1.00    0.40
   0   0   7   -1.50    1.00
   0   0   7    0.80    0.40
   0   0  -7   -0.70    0.80
   0   0   8 2354.46   57.59
   0   0  -8 2293.17   55.89
   0   0  -8 2349.67   57.69
   0   0   8 2484.05   57.19
   0   0   8 2304.97   57.59
   0   0  -8 2359.26   57.19
   0   0  -8 2457.05   57.59
   0   0  -9    1.50    1.40
   0   0  -9    2.10    0.60
   0   0   9    1.40    1.40
   0   0   9    0.80    1.30
   0   0  -9   -0.60    1.10
   0   0 -10 1724.93   42.40
   0   0  10 1683.93   42.20
   0   0  10 1771.92   43.00
   0   0 -10 1663.93   40.40
   0   0 -10 1709.33   43.00
   0   0 -11    0.70    0.60
   0   0 -11   -0.40    0.50
   0   0 -11    2.00    1.50
   0   0 -11   -0.50    1.50
   0   0  11   -0.20    1.50
   0   0  12  905.81   25.00
   0   0 -12  906.71   24.50
   0   0 -12  940.31   21.80
   0   0 -12  938.61   25.40
   0   0 -13   -0.30    2.10
   0   0  13   -0.10    1.80
   0   0 -14  611.24   18.70
   0   0  14  608.54   18.40
   0   0 -15    0.60    2.90
   0   0  15    3.50    2.80
   0   0  16   93.49    6.80
   0   0 -16   84.49    7.00
   0   0  17   -0.10    3.10
   0   0 -17    2.80    3.80
   0   0 -18  108.19    8.90
   0   0  18  106.99    8.00
   0   0 -19   -4.50    4.70
   0   0  19   -2.00    4.20
   0   0  19   -0.30    4.00
   0   1   0    0.00    0.20
   0   1   1   61.39    2.10
   0   1   1   62.09    1.80
   0   1   1   62.79    1.80
   0   1   1   59.89    2.00
   0   1  -1   63.69    1.90
   0   1  -1   61.69    1.90
   0   1  -1   64.69    2.00
   0  -1   1   61.99    1.90
   0  -1  -1   61.79    2.00
   0  -1  -1   62.79    2.10
   0  -1   1   65.59    2.00
   0  -1  -1   66.69    1.90
   0  -1   1   63.59    1.90
   0   1  -2  946.91   22.70
   0   1   2  977.80   23.00
   0   1   2  932.61   22.80
   0   1  -2  968.20   22.90
   0   1  -2  932.31   22.70
   0   1  -2  943.71   22.80
   0  -1   2  960.30   22.80
   0  -1   2  957.30   22.90
   0  -1  -2  971.80   23.00
   0  -1   2  964.10   22.70
   0  -1  -2  963.20   22.80
   0  -1   2  938.51   22.70
   0   1   3  907.01   22.50
   0   1  -3  905.41   22.10
   0   1   3  943.91   22.30
   0   1  -3  924.21   21.90
   0   1  -3  873.41   22.30
   0   1  -3  906.01   21.80
   0   1   3  907.01   22.00
   0  -1   3  925.41   21.90
   0  -1   3  854.31   22.40
   0  -1   3  915.81   21.80
   0  -1   3  913.81   22.10
   0  -1  -3  942.51   22.30
   0   1   4   17.20    1.20
   0   1  -4   17.10    1.30
   0   1   4   19.00    1.30
   0   1   4   18.50    1.40
   0   1  -4   18.70    1.20
   0   1  -4   18.20    1.00
   0   1  -4   18.50    1.40
   0  -1   4   19.10    1.00
   0  -1   4   18.30    1.30
   0  -1   4   18.40    1.30
   0  -1  -4   19.10    1.30
   0  -1  -4   18.40    1.40
   0  -1  -4   21.80    1.40
   0   1   5    3.60    0.90
   0   1  -5    2.50    0.70
   0   1   5    2.30    0.80
   0   1  -5    3.40    0.90
   0   1  -5    2.90    0.70
   0   1  -5    3.10    0.90
   0   1   5    3.70    1.00
   0  -1   5    2.00    0.70
   0  -1  -5    1.70    0.80
   0  -1  -5    4.40    0.90
   0  -1   5    2.00    0.80
   0  -1   5    2.10    0.80
   0  -1  -5    3.00    0.90
   0  -1   5    2.10    0.50
   0   1   6   90.59    3.60
   0   1  -6   94.89    3.70
   0   1  -6   93.59    3.00
   0   1  -6   95.29    3.40
   0   1   6   96.39    3.90
   0   1   6  100.19    3.70
   0   1  -6   94.29    3.80
   0  -1   6   89.39    2.90
   0  -1  -6   86.69    3.70
   0  -1  -6   93.89    3.60
   0  -1  -6   88.29    3.60
   0  -1   6   91.89    4.10
   0  -1   6   97.79    3.70
   0  -1   6  100.79    3.40
   0   1   7    2.90    1.10
   0   1  -7    3.50    0.80
   0   1  -7    1.70    1.10
   0   1  -7    2.00    1.10
   0   1   7    3.00    1.10
   0   1   7    3.70    1.30
   0   1  -7    1.80    0.90
   0  -1  -7    3.60    1.50
   0  -1   7    3.80    1.00
   0  -1   7    2.40    1.00
   0  -1   7    3.00    0.70
   0  -1   7    3.80    1.30
   0  -1  -7    1.40    1.10
   0  -1  -7    0.80    1.00
   0   1  -8    1.50    0.80
   0   1  -8    1.00    1.20
   0   1   8   -1.10    1.40
   0   1   8    0.40    1.00
   0   1   8    0.90    1.20
   0   1  -8    0.90    1.10
   0  -1  -8   -1.50    1.00
   0  -1   8    0.40    1.20
   0  -1   8    0.60    0.60
   0  -1  -8    0.20    1.10
   0  -1   8    0.00    1.00
   0  -1  -8    2.10    1.20
   0  -1   8   -2.20    1.20
   0   1   9    9.50    1.80
   0   1  -9   11.80    1.40
   0   1  -9   10.70    1.80
   0   1  -9   11.80    1.70
   0   1   9   11.00    1.80
   0  -1   9   12.00    1.30
   0  -1  -9   12.20    1.90
   0  -1   9   13.80    1.90
   0  -1   9   11.60    1.80
   0   1 -10   -2.10    1.20
   0   1  10   -1.80    1.30
   0   1 -10    0.10    0.80
   0   1 -10    0.30    1.50
   0  -1  10    0.20    0.70
   0  -1  10   -1.70    1.20
   0  -1 -10   -0.80    1.40
   0  -1  10    0.10    1.50
   0   1 -11   18.10    2.30
   0   1 -11   12.70    1.40
   0   1  11   15.30    2.50
   0   1 -11   12.10    2.30
   0  -1  11   14.90    2.40
   0  -1 -11   12.60    2.40
   0  -1  11   13.60    1.50
   0   1 -12   37.30    3.40
   0   1 -12   44.60    3.90
   0   1 -12   41.20    2.30
   0   1  12   38.80    3.70
   0  -1  12   36.80    3.60
   0  -1 -12   38.90    3.90
   0   1  13  125.69    6.20
   0   1 -13  126.79    4.10
   0   1 -13  124.29    5.90
   0   1 -13  123.39    6.70
   0  -1  13  121.89    6.20
   0  -1 -13  124.69    6.50
   0   1 -14   -2.40    2.30
   0   1 -14    1.60    1.00
   0   1 -14   -2.90    2.00
   0   1  14    4.50    2.30
   0  -1  14   -1.40    2.20
   0  -1 -14   -3.70    2.40
   0   1  15   45.00    5.40
   0   1 -15   44.40    4.90
   0  -1 -15   35.60    4.60
   0   1 -16    2.30    3.20
   0   1  16    7.50    3.00
   0  -1 -16    4.00    3.60
   0  -1  16    1.50    2.80
   0   1 -17   55.49    6.20
   0   1  17   46.60    5.70
   0  -1  17   43.20    5.10
   0  -1 -17   47.90    6.30
   0   1 -18   -6.70    4.00
   0   1  18    0.50    3.50
   0   1  18   -3.90    3.70
   0  -1 -18    6.70    4.60
   0  -1  18    2.40    3.90
   0   1  19    3.30    4.30
   0   1 -19    6.00    5.20
   0   1  19    3.90    4.70
   0  -1  19   -1.10    4.40
   0  -1 -19    3.80    4.70
   0   2   0   27.70    1.30
   0   2   0   28.10    1.30
   0   2   0   28.10    1.40
   0  -2   0   30.50    1.40
   0  -2   0   28.50    1.40
   0  -2   0   29.30    1.30
   0   2  -1 1904.71   46.10
   0   2   1 1863.11   46.10
   0   2  -1 1932.21   46.00
   0   2  -1 1976.70   46.10
   0   2   1 2031.40   46.30
   0  -2  -1 1968.60   46.10
   0  -2   1 1969.20   46.00
   0  -2  -1 1949.20   46.20
   0  -2   1 1887.01   46.10
   0  -2   2 3336.87   78.69
   0   2   3 9499.35  228.08
   0   2   3 9439.66  228.68
   0   2  -3 9167.18  230.48
   0   2  -3 9906.81  231.58
   0  -2  -3 8910.91  227.38
   0  -2  -3 9414.56  227.08
   0  -2   3 9465.75  230.98
   0  -2   3 9758.82  230.98
   0   2  -4  238.98    6.40
   0   2  -4  245.08    6.60
   0   2   4  227.78    6.40
   0   2   4  236.48    5.80
   0   2   4  232.38    6.90
   0   2  -4  236.68    6.70
   0   2  -4  228.88    6.30
   0   2   4  233.08    6.70
   0  -2   4  224.38    6.50
   0  -2  -4  222.98    6.80
   0  -2   4  236.68    6.70
   0  -2   4  239.68    6.30
   0  -2  -4  235.08    5.80
   0  -2   4  222.78    6.30
   0  -2  -4  240.88    6.50
   0   2  -5 2461.55   59.79
   0   2   5 2646.04   60.49
   0   2  -5 2433.26   60.19
   0   2   5 2587.14   60.29
   0   2  -5 2529.35   59.79
   0   2  -5 2619.44   60.09
   0   2   5 2458.35   59.99
   0  -2   5 2394.16   60.09
   0  -2   5 2564.54   60.19
   0  -2   5 2525.15   59.69
   0  -2  -5 2516.85   60.49
   0  -2  -5 2579.14   59.99
   0  -2   5 2398.26   59.69
   0   2  -6  413.96   10.70
   0   2  -6  424.46   11.20
   0   2   6  398.76   11.40
   0   2  -6  397.86   10.70
   0   2   6  408.76   11.20
   0   2   6  397.76   11.10
   0  -2   6  418.96   11.30
   0  -2   6  395.06   10.60
   0  -2   6  414.26   10.70
   0  -2  -6  411.46   11.00
   0  -2  -6  400.56   11.50
   0   2  -7 3066.99   74.99
   0   2   7 3236.98   75.29
   0   2  -7 3010.20   74.39
   0   2   7 3298.27   74.99
   0   2  -7 3182.18   74.89
   0   2   7 3064.49   74.79
   0   2  -7 3108.69   74.09
   0  -2  -7 3108.09   75.29
   0  -2   7 2983.30   73.99
   0  -2   7 3181.08   74.29
   0  -2   7 3006.80   74.79
   0  -2  -7 3144.09   74.69
   0  -2   7 3237.38   74.99
   0   2   8  154.38    5.80
   0   2   8  160.18    6.10
   0   2  -8  155.38    5.70
   0   2  -8  152.38    5.90
   0   2  -8  167.68    5.10
   0   2   8  154.68    5.60
   0  -2   8  167.78    5.40
   0  -2  -8  167.88    5.80
   0  -2   8  156.28    5.80
   0  -2  -8  162.78    6.10
   0  -2   8  153.78    5.70
   0  -2   8  161.58    4.90
   0   2   9  921.11   24.10
   0   2  -9  946.71   23.00
   0   2  -9  901.01   24.30
   0   2  -9  929.31   23.60
   0  -2   9  957.50   24.30
   0  -2   9  900.11   22.90
   0  -2  -9  920.91   24.60
   0  -2   9  937.21   23.50
   0   2  10  396.66   11.60
   0   2 -10  372.76   11.80
   0   2 -10  378.36   10.30
   0   2 -10  369.86   10.90
   0  -2  10  373.66   11.60
   0  -2  10  363.66   10.80
   0  -2 -10  377.36   11.90
   0  -2  10  377.76   10.20
   0   2 -11  835.52   22.30
   0   2 -11  874.41   23.40
   0   2  11  858.21   23.00
   0  -2  11  851.71   21.30
   0  -2 -11  840.42   23.40
   0  -2  11  831.12   23.00
   0   2 -12  275.27    8.10
   0   2 -12  279.77    9.20
   0   2  12  277.37    9.70
   0   2 -12  281.07   10.10
   0  -2  12  277.67    9.90
   0  -2 -12  279.97   10.20
   0   2 -13  254.87    7.50
   0   2 -13  243.38    8.70
   0   2  13  240.48    9.20
   0   2 -13  246.68    9.60
   0  -2 -13  231.08    9.60
   0  -2  13  246.28    9.30
   0   2  14   24.30    3.50
   0   2 -14   27.80    3.80
   0   2 -14   22.90    3.10
   0  -2 -14   23.40    3.80
   0  -2  14   19.30    3.30
   0   2 -15  261.97    9.80
   0   2  15  272.57   11.80
   0   2 -15  270.57   10.90
   0  -2 -15  257.57   10.90
   0   2  16   20.70    3.90
   0   2  16   16.50    3.40
   0   2 -16   26.10    4.40
   0  -2  16   16.60    3.80
   0  -2 -16   17.70    4.10
   0   2  17  145.79    8.10
   0   2  17  148.39    8.30
   0   2 -17  122.99    8.30
   0  -2  17  138.39    8.30
   0  -2 -17  133.99    9.00
   0   2  18   -1.70    3.90
   0   2 -18    4.20    4.70
   0   2  18    8.00    4.10
   0  -2 -18    6.60    4.40
   0  -2  18   12.80    4.40
   0   2  19   42.40    6.20
   0   2 -19   58.39    7.40
   0   2  19   55.29    6.30
   0  -2  19   51.89    6.20
   0  -2 -19   51.09    7.20
   0   3   0   -5.40    0.50
   0   3   0   -4.80    0.50
   0   3   0   -4.80    0.10
   0  -3   0   -5.30    0.50
   0  -3   0   -4.60    0.60
   0  -3   0   -5.00    0.50
   0   3   1   43.30    2.10
   0   3  -1   41.90    1.40
   0   3   1   44.40    1.30
   0   3  -1   41.70    1.90
   0   3   1   44.30    1.90
   0   3  -1   39.70    2.00
   0   3   1   41.20    1.30
   0   3  -1   41.80    2.00
   0   3   1   36.50    1.90
   0  -3   1   43.20    2.00
   0  -3  -1   39.70    2.10
   0  -3  -1   45.30    2.00
   0  -3   1   44.30    1.90
   0  -3   1   42.00    1.40
   0  -3  -1   42.20    1.90
   0   3  -2  158.68    4.80
   0   3   2  171.48    5.30
   0   3  -2  167.38    5.10
   0   3   2  163.68    4.40
   0   3  -2  161.88    4.50
   0   3  -2  167.08    5.00
   0   3   2  165.38    5.10
   0   3   2  163.28    4.70
   0  -3  -2  166.88    4.40
   0  -3  -2  154.78    5.10
   0  -3  -2  171.28    5.10
   0  -3   2  161.18    4.90
   0  -3   2  156.98    4.70
   0  -3  -2  161.28    4.70
   0  -3   2  167.38    4.50
   0   3   3   31.40    1.40
   0   3   3   30.50    1.80
   0   3  -3   30.00    1.50
   0   3   3   28.80    1.90
   0   3   3   28.30    1.50
   0   3  -3   27.70    1.50
   0   3  -3   32.40    1.80
   0   3  -3   29.40    1.80
   0  -3  -3   28.80    1.60
   0  -3   3   30.90    1.60
   0  -3   3   28.60    1.70
   0  -3   3   31.20    1.80
   0  -3  -3   31.30    2.00
   0  -3  -3   29.30    1.40
   0  -3   3   30.00    1.50
   0   3  -4   36.40    1.90
   0   3   4   39.10    1.90
   0   3   4   38.30    2.20
   0   3   4   41.20    2.50
   0   3   4   38.10    1.60
   0   3  -4   41.90    2.10
   0   3  -4   37.30    1.90
   0   3  -4   35.80    2.10
   0  -3  -4   41.00    1.90
   0  -3   4   43.60    2.00
   0  -3   4   40.40    2.10
   0  -3  -4   38.10    1.60
   0  -3   4   39.50    2.00
   0  -3   4   42.50    2.30
   0  -3  -4   39.20    2.40
   0   3   5  152.08    4.10
   0   3  -5  147.59    4.80
   0   3  -5  141.39    4.60
   0   3  -5  147.29    4.80
   0   3   5  147.09    5.20
   0   3  -5  148.99    5.10
   0   3   5  156.98    5.40
   0   3   5  131.79    5.40
   0   3   5  149.39    4.70
   0  -3   5  148.89    5.00
   0  -3   5  152.28    4.80
   0  -3  -5  148.69    4.00
   0  -3  -5  148.49    5.30
   0  -3  -5  153.08    4.70
   0  -3   5  147.19    4.80
   0  -3   5  150.48    4.60
   0   3   6  131.79    4.50
   0   3   6  126.29    4.90
   0   3  -6  133.29    4.40
   0   3   6  142.29    5.20
   0   3  -6  134.09    4.50
   0   3   6  133.29    3.50
   0   3  -6  128.59    4.90
   0   3   6  118.79    4.70
   0   3  -6  137.29    4.70
   0  -3  -6  131.69    3.50
   0  -3   6  117.39    5.40
   0  -3   6  131.99    4.80
   0  -3  -6  131.79    5.10
   0  -3  -6  130.09    4.50
   0  -3   6  126.79    4.40
   0  -3   6  141.99    4.40
   0   3  -7   14.10    1.70
   0   3   7   14.30    1.80
   0   3  -7   19.10    2.20
   0   3  -7   17.50    1.90
   0   3   7   19.00    2.20
   0   3   7   14.80    1.80
   0   3   7   13.20    2.10
   0   3  -7   14.30    1.90
   0  -3  -7   13.80    1.80
   0  -3  -7   16.40    0.70
   0  -3   7   14.40    1.80
   0  -3  -7   15.70    2.10
   0  -3   7   16.70    2.10
   0  -3   7   16.10    1.80
   0   3   8    7.10    2.00
   0   3  -8    7.20    1.60
   0   3  -8    9.00    1.50
   0   3  -8   10.40    1.70
   0   3   8    8.60    1.60
   0  -3   8    9.60    1.60
   0  -3  -8    9.90    1.70
   0  -3   8    4.20    1.40
   0  -3  -8    6.50    1.70
   0  -3   8    6.90    1.70
   0  -3   8    7.30    1.30
   0   3  -9   20.20    2.50
   0   3  -9   18.80    2.20
   0   3  -9   18.70    2.00
   0   3   9   17.50    2.20
   0  -3   9   16.40    2.00
   0  -3   9   11.30    1.90
   0  -3   9   16.40    1.90
   0  -3  -9   15.20    2.30
   0   3 -10  686.43   17.30
   0   3 -10  659.63   18.50
   0   3  10  671.03   18.10
   0   3 -10  651.63   17.50
   0  -3 -10  659.33   18.80
   0  -3  10  649.74   17.10
   0  -3  10  650.63   18.20
   0  -3  10  629.84   17.30
   0   3 -11   27.20    3.30
   0   3  11   24.10    2.90
   0   3 -11   27.10    2.90
   0   3 -11   27.60    2.80
   0  -3 -11   24.10    3.20
   0  -3  11   32.00    3.50
   0  -3  11   24.70    2.40
   0  -3  11   24.50    3.00
   0   3 -12    8.10    2.00
   0   3  12    6.30    2.10
   0   3 -12    6.60    2.40
   0   3  12    5.00    2.20
   0   3 -12    5.30    1.80
   0  -3  12    6.00    2.00
   0  -3  12    8.50    1.60
   0  -3 -12    8.90    2.60
   0   3  13    2.40    2.30
   0   3 -13    7.70    2.20
   0   3  13    3.60    2.00
   0   3 -13    5.60    2.40
   0  -3  13    5.90    1.70
   0  -3  13    5.80    2.30
   0  -3 -13    2.70    2.40
   0   3  14   32.10    3.90
   0   3 -14   19.90    3.70
   0   3  14   35.40    4.20
   0   3 -14   31.50    4.00
   0  -3  14   29.10    3.00
   0  -3 -14   38.10    4.60
   0  -3  14   26.40    3.60
   0   3  15    6.30    2.80
   0   3 -15    3.90    2.80
   0   3 -15    6.50    3.00
   0  -3  15   11.30    3.40
   0  -3  15    5.10    1.90
   0  -3 -15    8.80    3.80
   0   3 -16   44.60    5.10
   0   3  16   19.80    4.70
   0   3  16   27.70    4.30
   0   3 -16   27.90    4.50
   0  -3 -16   33.70    4.80
   0  -3  16   26.00    4.40
   0   3 -17   -1.70    3.70
   0   3  17    8.10    3.30
   0   3  17   -2.00    3.30
   0  -3 -17    8.40    4.20
   0  -3  17    1.60    3.60
   0   3  18   41.10    5.50
   0   3  18   36.80    5.40
   0   3 -18   38.90    6.10
   0  -3 -18   25.80    5.50
   0  -3  18   41.90    5.60
   0   4   0 2649.83   63.59
   0   4   0 2722.23   63.89
   0   4   0 2706.53   63.59
   0  -4   0 2701.23   63.59
   0  -4   0 2572.24   63.49
   0   4  -1 2272.67   53.69
   0   4   1 2291.47   53.29
   0   4  -1 2170.88   53.29
   0   4   1 2208.78   53.49
   0   4   1 2284.47   53.69
   0   4  -1 2292.37   53.49
   0  -4  -1 2297.07   53.49
   0  -4   1 2122.69   53.39
   0  -4  -1 2175.48   53.69
   0  -4  -1 2146.99   53.29
   0  -4   1 2295.17   53.39
   0   4  -2 1616.34   37.30
   0   4   2 1582.04   37.00
   0   4   2 1565.54   37.40
   0   4  -2 1484.65   37.00
   0   4   2 1461.75   36.30
   0   4   2 1612.24   37.60
   0   4  -2 1532.85   36.40
   0   4  -2 1510.95   37.30
   0  -4  -2 1492.85   37.60
   0  -4  -2 1451.45   36.90
   0  -4   2 1570.24   37.00
   0  -4  -2 1622.84   37.50
   0  -4   2 1470.15   36.40
   0  -4   2 1521.55   37.30
   0   4  -3 1370.66   32.40
   0   4   3 1415.26   32.60
   0   4   3 1426.36   33.50
   0   4   3 1326.97   34.00
   0   4  -3 1334.87   33.20
   0   4   3 1313.47   32.20
   0   4  -3 1411.56   33.10
   0   4  -3 1312.07   32.70
   0  -4  -3 1333.67   32.50
   0  -4   3 1322.67   32.40
   0  -4   3 1300.17   33.10
   0  -4   3 1411.96   32.80
   0  -4  -3 1272.67   32.30
   0   4   4 1185.68   28.50
   0   4   4 1181.18   29.40
   0   4  -4 1266.27   29.30
   0   4   4 1151.08   28.50
   0   4   4 1240.08   29.80
   0   4  -4 1171.98   28.80
   0   4  -4 1177.08   28.70
   0  -4   4 1197.38   29.30
   0  -4   4 1119.59   28.60
   0  -4  -4 1212.78   28.50
   0  -4  -4 1141.69   29.60
   0  -4   4 1134.19   29.30
   0  -4   4 1206.58   28.80
   0  -4  -4 1145.19   28.50
   0   4   5 2578.24   63.49
   0   4  -5 2730.13   63.99
   0   4  -5 2585.54   63.49
   0   4   5 2876.31   64.79
   0   4  -5 2640.84   64.19
   0   4  -5 2679.83   63.59
   0   4   5 2661.73   63.09
   0   4   5 2624.54   64.29
   0  -4  -5 2555.34   62.99
   0  -4   5 2793.52   64.19
   0  -4  -5 2698.73   63.49
   0  -4   5 2736.73   63.59
   0  -4   5 2566.54   63.59
   0  -4   5 2647.54   63.89
   0  -4  -5 2629.74   64.59
   0   4  -6 1211.18   29.10
   0   4   6 1176.08   29.90
   0   4  -6 1209.58   29.30
   0   4   6 1174.28   29.00
   0   4  -6 1168.78   28.90
   0   4  -6 1137.99   29.60
   0   4   6 1167.28   29.60
   0   4   6 1195.58   29.70
   0  -4   6 1138.79   29.40
   0  -4   6 1149.19   29.10
   0  -4  -6 1118.39   28.10
   0  -4  -6 1236.08   29.00
   0  -4   6 1117.09   29.20
   0  -4   6 1226.68   28.90
   0  -4  -6 1178.58   30.00
   0   4   7 1630.14   40.90
   0   4  -7 1718.03   40.50
   0   4  -7 1652.73   40.10
   0   4  -7 1606.34   40.90
   0   4   7 1633.54   40.30
   0   4  -7 1696.73   40.40
   0   4   7 1615.74   39.10
   0  -4   7 1631.44   40.30
   0  -4  -7 1578.84   39.00
   0  -4   7 1635.14   40.50
   0  -4   7 1719.83   40.10
   0  -4   7 1634.84   40.80
   0  -4  -7 1618.34   41.30
   0  -4  -7 1703.43   40.30
   0   4   8  240.98    8.20
   0   4  -8  244.18    7.90
   0   4   8  246.08    6.10
   0   4  -8  250.67    7.60
   0   4  -8  239.18    7.70
   0   4   8  244.08    7.70
   0   4  -8  245.38    8.30
   0  -4   8  246.58    7.60
   0  -4  -8  252.47    6.10
   0  -4   8  250.97    7.50
   0  -4  -8  242.08    7.80
   0  -4   8  234.38    7.80
   0  -4  -8  246.78    8.60
   0   4  -9 1018.60   25.60
   0   4   9 1022.50   26.00
   0   4   9 1034.50   26.50
   0   4  -9  986.40   25.60
   0   4  -9  991.20   26.60
   0  -4   9 1023.00   25.50
   0  -4   9  982.90   26.10
   0  -4   9 1002.00   25.60
   0  -4  -9 1017.20   27.00
   0   4 -10  485.85   14.40
   0   4 -10  475.15   13.90
   0   4 -10  491.15   13.40
   0   4  10  473.75   14.20
   0   4  10  472.35   13.80
   0  -4  10  475.95   13.20
   0  -4  10  471.85   13.90
   0  -4  10  462.05   13.20
   0  -4 -10  474.65   14.70
   0   4  11  172.58    7.20
   0   4  11  180.88    7.00
   0   4 -11  173.58    7.40
   0   4 -11  180.78    6.60
   0  -4  11  179.78    6.40
   0  -4 -11  179.48    7.80
   0  -4  11  187.18    7.20
   0   4  12  357.46   11.70
   0   4 -12  340.67   10.70
   0   4 -12  325.27   11.70
   0   4  12  354.16   11.50
   0  -4  12  355.06   10.40
   0  -4 -12  346.47   12.30
   0  -4  12  344.07   11.50
   0   4 -13  266.47    9.40
   0   4  13  279.07   10.10
   0   4  13  289.67   10.10
   0   4 -13  278.57   10.70
   0  -4  13  270.77   10.10
   0  -4  13  276.57    8.90
   0  -4 -13  275.57   10.90
   0   4  14  123.59    6.50
   0   4 -14  113.39    5.90
   0   4  14  123.19    6.50
   0   4 -14  110.09    7.10
   0  -4 -14  114.39    7.10
   0  -4  14  111.69    5.30
   0  -4  14  127.89    6.80
   0   4 -15  180.18   13.90
   0   4 -15  188.38    8.30
   0  -4  15  221.18    9.50
   0  -4 -15  201.08    9.60
   0  -4  15  196.98    7.30
   0   4 -16   28.80    4.10
   0   4  16   30.20    4.10
   0   4 -16   21.50    4.70
   0   4  16   33.90    4.40
   0  -4  16   25.20    4.30
   0  -4 -16   29.20    4.70
   0   4  17   72.29    7.00
   0   4 -17   74.79    7.90
   0   4 -17   82.29    7.00
   0   4  17   76.29    6.80
   0  -4  17   69.79    6.70
   0  -4 -17   65.69    7.90
   0   4 -18   25.60    5.60
   0   4  18   23.30    4.80
   0   4  18   20.20    4.90
   0  -4  18   23.70    9.20
   0  -4 -18   17.20    8.40
   0   5   0    0.70    1.10
   0   5   0   -0.20    0.80
   0   5   0    0.80    0.90
   0  -5   0   -0.80    0.90
   0  -5   0   -1.50    0.70
   0   5  -1    1.20    1.10
   0   5   1    0.40    1.00
   0   5  -1    0.50    0.30
   0   5   1   -1.10    1.10
   0   5  -1    3.60    1.10
   0   5   1    1.20    0.90
   0   5  -1   -0.20    1.00
   0  -5  -1    1.20    1.10
   0  -5   1    1.60    1.10
   0  -5   1    0.70    0.30
   0  -5  -1    2.60    1.10
   0  -5  -1    2.60    1.20
   0  -5   1   -0.10    0.90
   0   5   2   19.00    0.90
   0   5   2   17.20    0.90
   0   5   2   16.40    1.90
   0   5  -2   18.10    1.00
   0   5  -2   14.70    2.00
   0   5  -2   18.00    1.80
   0   5  -2   17.50    1.90
   0   5  -2   19.00    1.70
   0   5   2   16.30    1.80
   0   5   2   18.80    2.10
   0  -5   2   15.90    1.00
   0  -5  -2   15.30    1.90
   0  -5  -2   16.50    1.90
   0  -5  -2   18.60    1.70
   0  -5   2   18.50    1.80
   0  -5   2   18.60    1.80
   0   5   3   56.69    3.20
   0   5   3   56.09    3.10
   0   5  -3   64.19    3.10
   0   5  -3   59.39    3.00
   0   5  -3   58.29    2.20
   0   5   3   55.79    2.00
   0   5  -3   54.59    2.70
   0   5   3   59.39    2.70
   0  -5   3   61.99    2.80
   0  -5   3   53.89    2.90
   0  -5  -3   58.09    2.60
   0  -5  -3   54.09    3.10
   0  -5   3   54.79    2.20
   0   5   4   21.50    1.70
   0   5   4   19.90    1.40
   0   5  -4   18.30    1.70
   0   5  -4   22.80    1.60
   0   5   4   20.80    2.10
   0   5   4   20.80    2.40
   0   5  -4   16.60    1.90
   0   5  -4   18.20    2.20
   0  -5   4   20.10    1.50
   0  -5   4   17.30    1.90
   0  -5  -4   21.70    1.40
   0  -5   4   18.10    1.90
   0  -5  -4   16.70    2.10
   0  -5  -4   23.10    1.60
   0   5  -5    7.90    1.60
   0   5   5    5.00    1.70
   0   5   5    6.90    1.60
   0   5   5    6.30    1.00
   0   5   5    6.00    1.10
   0   5  -5    5.70    1.10
   0   5  -5    5.80    1.30
   0   5  -5    6.60    1.30
   0  -5   5    3.80    1.50
   0  -5   5    5.20    1.10
   0  -5   5    5.10    1.30
   0  -5   5    4.50    1.20
   0  -5  -5    5.30    1.00
   0  -5  -5    2.50    1.30
   0  -5  -5    4.30    0.90
   0   5  -6    1.40    1.10
   0   5   6    0.20    0.90
   0   5  -6    1.20    1.20
   0   5  -6   -0.80    1.30
   0   5   6    0.50    0.90
   0   5   6    0.00    1.20
   0  -5  -6   -0.20    0.70
   0  -5   6    1.00    1.50
   0  -5   6    1.20    1.10
   0  -5   6   -1.40    1.10
   0  -5  -6    0.70    1.10
   0  -5  -6   -1.70    1.10
   0  -5   6   -0.60    1.00
   0   5   7   82.29    4.20
   0   5  -7   81.19    4.00
   0   5  -7   78.79    4.20
   0   5   7   83.69    3.70
   0   5   7   86.09    3.00
   0   5  -7   84.49    3.70
   0  -5  -7   90.39    3.80
   0  -5  -7   80.19    4.40
   0  -5   7   80.49    3.80
   0  -5  -7   88.99    3.00
   0  -5   7   80.99    3.80
   0  -5   7   85.29    3.70
   0   5   8  384.96   12.10
   0   5   8  396.96   11.40
   0   5  -8  421.66   12.50
   0   5  -8  393.16   12.20
   0   5   8  396.56   10.40
   0   5  -8  410.76   11.30
   0  -5   8  403.26   11.30
   0  -5   8  397.96   11.60
   0  -5  -8  405.66   11.50
   0  -5  -8  396.16   12.60
   0  -5  -8  399.26   10.10
   0  -5   8  395.96   11.60
   0   5   9   35.80    3.40
   0   5  -9   40.70    3.00
   0   5   9   46.40    1.70
   0   5   9   41.80    3.10
   0   5  -9   46.50    3.60
   0  -5   9   43.20    3.10
   0  -5  -9   43.20    1.60
   0  -5   9   42.40    3.10
   0  -5   9   37.50    3.20
   0  -5  -9   40.50    3.70
   0   5 -10   23.30    3.10
   0   5  10   27.80    3.00
   0   5 -10   26.00    2.80
   0   5  10   21.60    2.80
   0  -5  10   24.40    3.10
   0  -5  10   23.30    2.60
   0  -5 -10   26.40    3.40
   0  -5  10   24.30    2.60
   0   5 -11    2.70    2.10
   0   5  11    0.20    1.90
   0   5  11    2.90    1.80
   0   5 -11    4.90    1.80
   0  -5  11    1.80    1.70
   0  -5 -11    5.30    2.20
   0  -5  11    2.80    1.80
   0   5 -12   96.59    5.10
   0   5 -12  104.29    6.20
   0   5  12   99.89    5.70
   0   5  12  100.99    5.30
   0  -5  12   99.19    5.70
   0  -5 -12  103.69    6.30
   0  -5  12  104.09    5.10
   0   5  13   97.79    5.70
   0   5 -13   96.19    5.20
   0   5  13   84.39    5.60
   0   5 -13   86.69    6.00
   0  -5  13   91.29    5.80
   0  -5  13   95.19    5.00
   0  -5 -13   85.19    6.20
   0   5  14    0.90    2.50
   0   5 -14    6.20    2.60
   0   5 -14    0.10    2.70
   0   5  14    2.90    2.60
   0  -5  14    3.50    2.70
   0  -5 -14    0.60    2.80
   0  -5  14    0.60    2.20
   0   5 -15    4.60    3.00
   0   5  15    8.60    3.30
   0   5  15    8.80    3.60
   0   5 -15    5.60    3.40
   0  -5  15    6.10    2.60
   0  -5 -15    7.20    3.60
   0  -5  15    6.20    3.00
   0   5 -16   26.40    4.60
   0   5 -16   34.80    4.40
   0   5  16   28.30    4.50
   0   5  16   38.90    5.00
   0  -5  16   28.10    3.60
   0  -5 -16   30.20    5.30
   0  -5  16   34.30    4.60
   0   5 -17    6.80    4.50
   0   5  17   13.40    4.10
   0   5  17    9.90    4.30
   0  -5 -17    7.60    4.60
   0  -5  17    7.30    4.10
   0   5  18   32.00    5.40
   0   5  18   26.90    5.10
   0   5 -18   31.50    6.10
   0  -5  18   20.90    5.00
   0  -5 -18   29.50    6.30
   0   6   0 3811.82   90.49
   0   6   0 3968.30   91.09
   0   6   0 3689.93   90.49
   0  -6   0 3860.51   90.59
   0  -6   0 3639.34   90.39
   0   6  -1  368.76    8.80
   0   6   1  363.26   10.70
   0   6   1  372.36   10.50
   0   6   1  350.76   10.90
   0   6  -1  356.76   10.60
   0   6  -1  381.76   10.60
   0   6  -1  393.36   11.10
   0  -6   1  394.16   10.60
   0  -6  -1  363.76   11.00
   0  -6   1  357.66   10.60
   0  -6  -1  363.56   10.50
   0  -6  -1  367.36   10.70
   0   6   2 2415.06   58.89
   0   6  -2 2355.76   56.89
   0   6  -2 2465.05   58.59
   0   6   2 2478.15   58.19
   0   6  -2 2394.06   58.69
   0   6  -2 2399.56   58.29
   0   6   2 2399.36   58.69
   0   6  -2 2448.96   58.79
   0  -6  -2 2363.56   58.19
   0  -6  -2 2460.75   58.69
   0  -6   2 2506.55   58.29
   0  -6   2 2306.57   56.89
   0  -6  -2 2400.46   58.99
   0  -6   2 2444.36   58.69
   0   6  -3  119.29    4.60
   0   6  -3  117.29    5.30
   0   6   3  124.89    5.80
   0   6  -3  121.99    3.60
   0   6   3  117.49    3.40
   0   6   3  119.59    3.40
   0   6   3  116.29    4.80
   0   6  -3  115.79    5.00
   0   6   3  125.69    4.40
   0   6  -3  116.19    4.80
   0  -6  -3  116.79    4.90
   0  -6  -3  115.39    5.10
   0  -6   3  120.89    4.50
   0  -6   3  116.59    3.60
   0  -6  -3  120.99    4.40
   0  -6   3  118.59    4.80
   0   6  -4 2039.70   49.30
   0   6   4 1982.00   49.10
   0   6  -4 2031.40   50.09
   0   6   4 2099.29   50.89
   0   6  -4 2108.89   50.79
   0   6   4 2128.09   49.90
   0  -6  -4 2039.40   49.90
   0  -6   4 2145.89   50.69
   0  -6  -4 2040.50   51.09
   0  -6   4 2013.90   49.30
   0  -6   4 2101.09   50.09
   0   6   5   25.30    2.30
   0   6   5   22.20    1.70
   0   6  -5   26.10    2.10
   0   6   5   21.60    2.50
   0   6  -5   24.30    2.50
   0   6  -5   23.10    2.20
   0  -6  -5   22.30    2.70
   0  -6   5   21.80    2.40
   0  -6   5   23.60    2.00
   0  -6   5   29.20    2.50
   0   6   6 1304.07   31.50
   0   6  -6 1303.87   31.70
   0   6   6 1262.17   32.90
   0   6  -6 1265.97   31.90
   0   6  -6 1259.27   32.80
   0   6   6 1312.27   31.50
   0  -6  -6 1314.17   31.50
   0  -6   6 1275.37   31.70
   0  -6   6 1275.77   32.50
   0  -6  -6 1305.87   33.40
   0  -6   6 1264.47   31.90
   0  -6  -6 1275.97   31.40
   0   6   7  228.58    6.60
   0   6   7  217.88    6.90
   0   6  -7  208.08    7.00
   0   6  -7  219.68    8.00
   0   6  -7  209.48    7.00
   0   6   7  223.68    8.00
   0  -6  -7  220.08    6.40
   0  -6  -7  217.78    6.90
   0  -6   7  220.78    7.60
   0  -6   7  212.88    7.00
   0  -6  -7  215.98    8.20
   0  -6   7  224.38    7.20
   0   6   8 1232.98   29.40
   0   6   8 1214.58   31.50
   0   6  -8 1187.28   31.40
   0   6   8 1208.78   30.20
   0   6  -8 1201.48   30.30
   0  -6   8 1231.48   30.30
   0  -6  -8 1186.68   29.30
   0  -6  -8 1224.48   30.20
   0  -6   8 1181.18   30.40
   0  -6  -8 1169.38   31.80
   0  -6   8 1215.98   30.90
   0   6  -9   56.59    3.60
   0   6   9   58.39    3.50
   0   6  -9   58.39    4.20
   0   6   9   59.59    4.20
   0   6   9   57.39    2.50
   0  -6   9   51.59    3.80
   0  -6  -9   57.39    2.40
   0  -6  -9   56.29    4.40
   0  -6   9   58.29    3.80
   0  -6   9   50.49    3.80
   0   6  10  910.31   24.00
   0   6  10  938.21   25.30
   0   6  10  889.11   21.80
   0   6 -10  969.50   25.50
   0   6 -10  903.31   23.80
   0  -6 -10  908.51   21.80
   0  -6  10  883.41   24.20
   0  -6  10  929.81   24.40
   0  -6 -10  897.11   25.60
   0   6 -11   21.20    3.30
   0   6  11   23.40    3.40
   0   6 -11   25.70    2.90
   0   6  11   24.00    2.90
   0  -6  11   26.70    3.10
   0  -6  11   24.30    3.10
   0  -6 -11   25.30    3.80
   0   6  12  593.84   17.60
   0   6  12  569.74   16.50
   0   6 -12  553.84   16.00
   0   6 -12  548.45   17.50
   0  -6  12  565.54   16.30
   0  -6 -12  562.74   18.00
   0  -6  12  553.64   16.70
   0   6 -13    6.20    2.50
   0   6  13    4.70    2.80
   0   6 -13    3.00    2.90
   0   6  13    7.60    2.60
   0  -6  13   11.00    2.60
   0  -6  13   10.70    2.80
   0   6 -14  191.08    8.00
   0   6  14  202.78    8.40
   0   6 -14  190.58    9.60
   0   6  14  192.98    9.30
   0  -6 -14  191.38    9.50
   0  -6  14  183.58    7.90
   0  -6  14  185.68    9.70
   0   6  15    3.20    3.40
   0   6 -15    9.00    4.00
   0   6  15    5.50    3.40
   0   6 -15   10.10    3.20
   0  -6 -15   14.50    4.40
   0  -6  15   12.30    3.10
   0  -6  15   10.80    3.50
   0   6 -16   96.99    7.40
   0   6  16   75.89    7.10
   0   6 -16   83.49    7.50
   0   6  16   88.19    6.70
   0  -6  16  104.69    7.60
   0  -6 -16   98.09    8.00
   0  -6  16   80.39    6.30
   0   6  17   -2.10    3.90
   0   6  17    1.90    4.00
   0   6 -17   -2.90    4.50
   0  -6  17   -1.40    3.90
   0  -6 -17   -2.00    4.90
   0   7   0   -1.10    1.20
   0  -7   0   -1.10    1.50
   0  -7   0    0.50    1.10
   0   7  -1  193.48    6.60
   0   7   1  178.58    6.60
   0  -7   1  185.08    6.60
   0  -7  -1  185.28    6.40
   0  -7   1  188.58    6.60
   0   7  -2    9.50    1.70
   0   7  -2    9.60    0.80
   0   7   2   10.00    1.70
   0   7  -2    9.30    1.70
   0   7   2   11.60    2.00
   0  -7  -2    7.10    1.90
   0  -7   2    9.90    1.80
   0  -7   2    8.60    1.70
   0  -7  -2   12.60    1.80
   0  -7   2    8.20    0.70
   0   7   3   21.30    2.70
   0   7  -3   25.10    2.30
   0   7   3   25.40    1.10
   0   7   3   26.00    2.60
   0   7  -3   23.30    2.50
   0   7   3   25.10    1.10
   0  -7   3   26.10    2.70
   0  -7   3   30.50    2.80
   0  -7  -3   21.50    2.80
   0  -7   3   24.70    1.40
   0  -7  -3   27.20    2.40
   0   7  -4   11.20    2.10
   0   7   4   10.40    1.10
   0   7  -4   12.80    1.80
   0   7   4   12.80    2.10
   0   7  -4   11.60    1.30
   0   7   4   11.50    1.90
   0  -7   4   10.30    1.80
   0  -7   4   10.90    1.20
   0  -7  -4   11.20    2.30
   0  -7  -4   12.00    1.70
   0  -7   4   10.90    1.90
   0   7  -5  121.99    4.90
   0   7  -5  112.09    5.40
   0   7   5  124.09    4.80
   0   7   5  119.99    3.90
   0   7  -5  125.19    4.30
   0   7   5  109.19    5.30
   0  -7   5  123.49    4.20
   0  -7  -5  115.59    5.70
   0  -7   5  123.09    5.00
   0  -7   5  114.59    5.20
   0  -7  -5  121.49    4.60
   0   7  -6   24.90    2.50
   0   7   6   29.10    3.10
   0   7   6   26.20    2.10
   0   7   6   27.90    2.80
   0   7  -6   24.80    2.60
   0   7  -6   26.10    2.90
   0  -7  -6   22.90    2.30
   0  -7   6   27.80    2.90
   0  -7   6   28.30    2.90
   0  -7  -6   25.70    3.20
   0  -7   6   27.60    2.30
   0   7   7    0.00    1.20
   0   7  -7   -0.10    1.70
   0   7   7    1.40    1.50
   0   7  -7    0.00    1.40
   0   7  -7    0.20    1.60
   0   7   7    1.30    1.80
   0  -7  -7   -0.30    1.80
   0  -7   7    1.30    1.60
   0  -7  -7    2.30    1.30
   0  -7   7    3.50    1.20
   0  -7   7   -0.50    1.80
   0   7   8    3.00    1.40
   0   7   8    5.10    2.00
   0   7  -8    3.80    1.80
   0   7  -8    5.50    2.00
   0   7   8    2.90    1.50
   0  -7   8    5.70    1.60
   0  -7  -8    2.20    2.00
   0  -7   8    4.50    1.90
   0  -7  -8    1.90    1.60
   0   7  -9   96.39    4.70
   0   7   9   91.49    4.50
   0   7   9  101.99    5.60
   0   7   9   99.89    4.00
   0   7  -9   96.29    5.50
   0  -7  -9   96.99    5.90
   0  -7   9  102.49    5.50
   0  -7   9  103.89    4.80
   0  -7  -9  103.59    3.80
   0   7  10   -1.20    1.60
   0   7  10   -0.10    2.00
   0   7 -10    4.10    1.90
   0   7  10    2.60    1.30
   0   7 -10    4.90    2.40
   0  -7  10    6.10    2.00
   0  -7 -10    3.30    1.20
   0  -7  10   -2.20    1.90
   0  -7 -10    2.30    2.60
   0   7 -11   71.69    5.80
   0   7  11   79.39    5.50
   0   7 -11   78.39    4.60
   0   7  11   82.29    4.70
   0  -7  11   84.39    5.00
   0  -7  11   76.09    5.20
   0  -7 -11   74.39    5.80
   0   7 -12    2.90    2.30
   0   7  12    0.40    2.20
   0   7 -12   -1.00    2.40
   0  -7  12    0.60    2.10
   0  -7  12    2.70    2.40
   0   7 -13   36.50    4.50
   0   7  13   28.90    3.60
   0   7  13   29.60    4.20
   0   7 -13   35.00    6.90
   0  -7  13   39.90    4.70
   0  -7 -13   32.70    4.70
   0  -7  13   33.10    4.10
   0   7  14    3.40    3.00
   0   7 -14    3.30    2.90
   0   7  14    6.40    3.30
   0   7 -14    1.90    3.60
   0  -7  14    1.00    2.90
   0  -7 -14    8.60    3.90
   0   7 -15  115.39    8.00
   0   7 -15  106.59    6.90
   0   7  15  109.89    8.10
   0   7  15  119.09    7.50
   0  -7  15  103.59    7.40
   0  -7  15   92.09    6.50
   0  -7 -15  104.39    8.20
   0   7 -16   -7.20    4.40
   0   7  16    1.40    3.70
   0   7  16    0.10    3.80
   0  -7  16   -6.00    3.80
   0  -7 -16    1.60    4.40
   0   7  17   27.40    5.70
   0   8   0    0.10    1.50
   0  -8   0   -2.50    1.30
   0   8   1 1079.49   27.80
   0   8  -1 1070.09   28.00
   0   8  -1 1068.89   27.60
   0  -8   1 1037.10   27.70
   0  -8  -1 1072.19   27.60
   0   8   2  257.17    8.90
   0   8  -2  257.07    9.00
   0   8  -2  257.27    8.60
   0  -8  -2  265.77    8.60
   0  -8  -2  266.67    9.50
   0  -8   2  256.57    8.90
   0   8  -3 1696.93   42.40
   0   8  -3 1641.44   39.60
   0   8  -3 1679.43   41.70
   0   8   3 1695.13   42.30
   0  -8   3 1707.23   42.20
   0  -8  -3 1663.63   42.70
   0  -8  -3 1663.13   41.60
   0  -8   3 1647.74   39.60
   0   8  -4    1.60    0.90
   0   8   4    3.60    1.70
   0   8  -4    1.80    1.70
   0   8   4    1.50    0.60
   0   8   4    3.30    0.60
   0   8  -4    3.50    1.60
   0  -8  -4    2.00    1.90
   0  -8  -4    1.70    1.30
   0  -8   4   -2.00    1.50
   0  -8   4    1.10    0.90
   0   8   5 1187.58   28.40
   0   8  -5 1217.98   31.10
   0   8   5 1157.78   31.00
   0   8   5 1174.08   28.50
   0   8  -5 1202.28   28.90
   0   8  -5 1176.28   30.10
   0  -8   5 1167.98   30.80
   0  -8   5 1176.58   28.80
   0  -8  -5 1205.18   29.90
   0  -8  -5 1140.19   31.40
   0   8   6   24.40    2.20
   0   8  -6   27.10    2.90
   0   8   6   30.60    3.80
   0   8   6   31.20    2.10
   0   8  -6   26.60    3.20
   0   8   6   26.30    3.20
   0   8  -6   35.50    2.80
   0  -8   6   25.40    3.20
   0  -8  -6   26.00    2.70
   0  -8  -6   24.30    3.30
   0  -8   6   30.60    2.40
   0   8   7  744.03   21.50
   0   8  -7  791.82   21.70
   0   8  -7  747.43   19.70
   0   8   7  787.22   20.00
   0   8   7  749.62   20.00
   0   8  -7  753.72   20.30
   0  -8   7  745.43   21.10
   0  -8  -7  760.32   22.10
   0  -8  -7  751.22   19.80
   0  -8   7  772.82   19.70
   0   8  -8   65.49    4.10
   0   8   8   68.09    4.90
   0   8   8   68.39    4.30
   0   8   8   69.79    3.70
   0   8  -8   63.09    4.80
   0  -8  -8   69.79    3.60
   0  -8  -8   70.49    5.20
   0  -8   8   56.69    4.40
   0  -8   8   69.49    3.90
   0   8  -9  729.03   21.10
   0   8  -9  701.73   19.50
   0   8   9  694.03   19.00
   0   8   9  746.13   21.20
   0  -8   9  707.03   20.40
   0  -8   9  714.43   19.40
   0  -8  -9  736.33   21.70
   0  -8  -9  719.13   18.50
   0   8 -10    8.20    2.40
   0   8  10   13.10    2.30
   0   8 -10    8.70    2.80
   0   8  10   20.90    3.30
   0  -8 -10    7.50    3.10
   0  -8  10    9.60    2.40
   0  -8  10    7.20    2.60
   0  -8 -10   13.30    2.00
   0   8 -11  279.17   10.80
   0   8  11  254.57   12.00
   0   8  11  265.87    9.40
   0   8 -11  271.97    9.50
   0  -8 -11  274.37   11.60
   0  -8  11  277.27    9.70
   0  -8  11  278.37   10.30
   0   8  12   26.90    4.20
   0   8 -12   19.60    4.40
   0   8 -12   22.70    3.20
   0   8  12   15.10    3.00
   0  -8  12   19.70    3.30
   0  -8  12   21.10    3.50
   0  -8 -12   20.20    4.10
   0   8 -13  179.08    9.10
   0   8  13  186.28    8.20
   0   8  13  181.68    9.20
   0   8 -13  170.18    7.80
   0  -8  13  172.88    8.20
   0  -8 -13  188.68    9.70
   0  -8  13  172.18   11.60
   0   8 -14   13.10    4.20
   0   8  14   11.10    3.90
   0   8  14    5.70    3.20
   0   8 -14    5.20    3.60
   0  -8  14    5.90    3.40
   0  -8  14    0.80    3.20
   0  -8 -14   -3.20    4.10
   0   8  15   87.19    7.80
   0   8  15   87.19    7.10
   0   8 -15  101.39    8.80
   0  -8  15   92.89    7.10
   0  -8  15   92.39    7.50
   0  -8 -15   84.59    8.20
   0   8  16    9.50    5.00
   0   8 -16   15.00    5.00
   0   8  16    3.40    4.00
   0  -8  16   11.30    4.60
   0  -8  16    8.70    4.10
   0   9   0   -1.40    1.70
   0  -9   0   -0.50    1.50
   0   9  -1    9.30    2.20
   0   9  -1    7.50    2.20
   0   9   1    4.10    2.00
   0  -9  -1    5.90    1.80
   0  -9   1   10.60    2.20
   0   9   2   -0.70    1.70
   0   9  -2   -0.50    1.60
   0   9  -2    3.70    1.90
   0  -9  -2    1.30    1.70
   0  -9   2    0.40    1.80
   0   9   3    5.20    2.10
   0   9  -3    5.20    2.10
   0   9  -3    3.80    1.90
   0  -9  -3    4.80    2.30
   0  -9   3    6.90    2.10
   0  -9  -3    6.20    1.90
   0   9   4    9.40    2.50
   0   9  -4    9.80    2.20
   0   9  -4    9.20    2.40
   0  -9  -4    5.80    1.90
   0  -9   4    9.00    1.00
   0  -9  -4    7.40    2.60
   0  -9   4    7.40    2.20
   0   9   5    2.70    0.70
   0   9  -5    6.20    1.30
   0   9   5    1.20    2.10
   0   9  -5    2.50    2.10
   0   9  -5    1.20    1.80
   0   9   5    3.10    0.70
   0  -9  -5    2.20    1.60
   0  -9  -5    6.30    2.70
   0  -9   5    3.00    2.10
   0  -9   5    2.40    1.10
   0   9   6   56.29    2.50
   0   9  -6   52.69    4.40
   0   9  -6   59.59    3.30
   0   9   6   52.49    4.60
   0   9  -6   58.69    4.10
   0   9   6   61.89    2.70
   0  -9  -6   55.49    5.20
   0  -9  -6   57.09    3.70
   0  -9   6   55.59    4.40
   0   9   7    5.20    1.40
   0   9   7    4.10    2.40
   0   9  -7    3.90    2.20
   0   9  -7    8.50    2.70
   0  -9   7    6.30    1.70
   0  -9   7    3.80    2.40
   0  -9  -7    9.90    2.00
   0  -9  -7   10.20    3.10
   0   9   8   70.99    5.60
   0   9   8   65.99    3.60
   0   9  -8   60.59    4.50
   0   9  -8   59.09    5.00
   0  -9  -8   66.49    3.90
   0  -9   8   70.99    3.90
   0  -9  -8   64.49    5.80
   0  -9   8   60.19    4.80
   0   9   9   -0.10    2.80
   0   9   9    1.50    1.80
   0   9  -9    3.30    2.30
   0   9  -9    8.20    2.70
   0  -9  -9    4.20    1.80
   0  -9   9    5.60    2.10
   0  -9   9    2.70    2.50
   0  -9  -9    6.20    4.10
   0   9 -10   20.90    3.70
   0   9  10   20.30    2.70
   0   9 -10   20.20    3.10
   0   9  10   25.90    4.10
   0  -9  10   21.70    2.80
   0  -9 -10   24.70    3.00
   0  -9  10   25.30    3.70
   0  -9 -10   19.00    3.70
   0   9 -11   21.30    3.40
   0   9  11   23.30    3.10
   0   9  11   20.20    3.90
   0   9 -11   25.90    4.30
   0  -9  11   20.70    3.70
   0  -9  11   23.10    3.20
   0  -9 -11   23.30    4.60
   0   9 -12   98.59    7.60
   0   9  12   98.29    5.90
   0   9 -12  102.89    6.20
   0   9  12   95.09    7.50
   0  -9 -12   92.49    8.10
   0  -9  12   99.49    6.10
   0  -9  12   98.19    7.00
   0   9  13   14.90    4.30
   0   9 -13   16.60    4.10
   0   9 -13   13.60    4.20
   0   9  13    5.30    3.10
   0  -9  13   17.20    3.90
   0  -9  13    8.30    3.30
   0  -9 -13   13.10    4.20
   0   9  14   25.20    5.00
   0   9  14   26.00    4.20
   0   9 -14   19.40    5.00
   0  -9  14   21.00    4.40
   0  -9 -14   24.10    5.50
   0  -9  14   21.90    4.50
   0   9  15   21.60    5.60
   0   9 -15   19.90    5.80
   0   9  15   22.70    5.30
   0  -9  15   17.00    4.50
   0  -9 -15   30.20    5.90
   0  -9  15   16.10    4.70
   0  10   0  415.36   13.70
   0  10   0  428.46   13.50
   0 -10   0  434.16   13.50
   0  10   1  370.26   12.30
   0  10  -1  373.36   12.60
   0  10  -1  361.76   12.10
   0 -10  -1  382.36   12.10
   0 -10   1  363.06   12.10
   0  10  -2  580.54   17.30
   0  10   2  608.24   17.90
   0  10  -2  595.64   17.90
   0 -10   2  607.84   17.70
   0 -10  -2  596.94   17.20
   0  10   3  191.88    8.00
   0  10  -3  179.08    8.20
   0  10  -3  176.78    7.40
   0 -10  -3  195.48    7.60
   0 -10   3  182.08    7.80
   0  10  -4  265.07   10.10
   0  10  -4  255.87    9.40
   0  10   4  264.47   10.00
   0 -10  -4  257.67   10.50
   0 -10  -4  271.17    9.30
   0 -10   4  270.67    9.90
   0  10  -5  405.86   13.60
   0  10   5  429.66   13.80
   0  10  -5  396.76   12.60
   0 -10   5  396.86   13.40
   0 -10  -5  410.46   12.50
   0 -10   5  392.56   10.20
   0 -10  -5  401.36   14.20
   0  10   6  502.85   16.10
   0  10  -6  525.95   16.20
   0  10  -6  487.05   14.80
   0 -10   6  493.35   15.70
   0 -10   6  484.55   12.80
   0 -10  -6  476.45   16.30
   0 -10  -6  499.15   14.50
   0  10   7  129.49    7.40
   0  10  -7  158.28    7.70
   0  10   7  149.39    5.90
   0  10  -7  144.59    6.70
   0 -10   7  146.89    5.20
   0 -10   7  147.29    7.50
   0 -10  -7  155.78   12.40
   0 -10  -7  149.09    6.20
   0  10  -8  222.48    8.60
   0  10  -8  221.68   10.00
   0  10   8  240.08    9.90
   0 -10   8  200.58    9.30
   0 -10  -8  235.48   10.30
   0 -10  -8  223.38    8.00
   0 -10   8  218.68    7.40
   0  10  -9  172.98    8.80
   0  10  -9  165.48    7.50
   0  10   9  159.98    8.50
   0 -10   9  168.98    8.30
   0 -10   9  161.68    6.50
   0 -10  -9  174.48    9.20
   0 -10  -9  178.78    6.70
   0  10 -10   90.39    5.90
   0  10  10  101.09    7.10
   0  10 -10  100.39    6.90
   0 -10  10   99.19    6.60
   0 -10 -10  100.39    8.00
   0 -10  10   97.39    5.30
   0  10 -11   69.29    5.80
   0  10  11   59.99    6.90
   0  10 -11   70.69    6.50
   0 -10 -11   61.09    6.90
   0 -10  11   69.49    5.10
   0 -10  11   71.19    6.10
   0  10 -12  156.78    9.10
   0  10  12  149.39    8.90
   0 -10  12  151.78    7.40
   0 -10 -12  153.48    9.60
   0 -10  12  138.69    8.30
   0  10  13   34.70    5.60
   0  10 -13   66.69    7.80
   0 -10 -13   40.30    6.20
   0 -10  13   37.10    6.00
   0 -10  13   43.00    5.60
   0  10  14   42.50    6.20
   0  10 -14   42.50    6.60
   0 -10  14   32.90    5.60
   0 -10 -14   43.60    7.10
   0  11   0   -2.20    2.30
   0  11   0   -2.00    2.30
   0 -11   0   -3.60    2.20
   0  11   1   16.50    3.30
   0  11  -1   11.90    2.90
   0  11  -1   13.50    2.90
   0 -11  -1   11.70    2.80
   0 -11   1   13.90    3.00
   0  11  -2    8.10    2.90
   0  11   2    4.10    2.90
   0  11  -2    4.60    2.60
   0 -11   2    2.50    2.60
   0 -11  -2    2.70    2.40
   0  11   3    3.10    2.70
   0  11  -3    3.20    2.50
   0  11  -3    0.30    2.60
   0 -11   3   -2.90    2.30
   0 -11  -3    0.80    2.10
   0  11  -4    2.40    2.70
   0  11   4   -1.30    2.50
   0  11  -4   -2.50    2.30
   0 -11  -4    2.20    2.30
   0  11  -5    6.50    2.60
   0  11  -5   -1.00    2.80
   0 -11  -5    3.70    2.50
   0 -11   5    2.60    2.90
   0 -11  -5    6.10    3.20
   0  11  -6   10.20    3.80
   0  11   6   13.20    3.40
   0  11  -6   12.20    3.20
   0 -11   6    5.80    3.10
   0 -11  -6    5.00    2.60
   0 -11  -6    7.40    3.40
   0  11  -7   40.90    5.10
   0  11  -7   26.10    3.70
   0  11   7   27.80    4.50
   0 -11  -7   26.20    3.40
   0 -11   7   24.80    4.00
   0 -11  -7   27.50    4.60
   0  11  -8   52.79    5.40
   0  11  -8   51.59    5.80
   0  11   8   55.09    5.80
   0 -11   8   50.69    5.70
   0 -11  -8   61.39    4.80
   0 -11  -8   51.49    6.30
   0  11  -9    5.50    3.30
   0  11  -9    9.30    3.70
   0  11   9    0.80    3.40
   0 -11  -9    1.40    3.80
   0 -11   9   -1.70    3.10
   0 -11  -9    1.80    2.80
   0  11 -10   32.10    4.90
   0  11  10   29.30    5.10
   0  11 -10   20.70    3.90
   0 -11 -10   18.40    4.70
   0 -11  10   20.00    4.40
   0  11  11    4.80    4.10
   0  11 -11    3.30    4.00
   0 -11 -11   -1.00    4.50
   0 -11  11   10.10    4.10
   0  11  12   25.20    5.40
   0  11 -12   23.80    5.40
   0 -11 -12   28.90    5.80
   0 -11  12   34.00    5.40
   0  12   0  269.67   11.00
   0  12   0  260.47   10.60
   0 -12   0  238.78   10.00
   0  12   1   61.99    6.90
   0  12  -1   75.29    6.00
   0  12   1   72.79    6.00
   0  12  -1   78.59    6.00
   0 -12   1   82.29    6.00
   0 -12  -1   68.29    6.30
   0  12   2  374.86   15.70
   0  12  -2  400.26   14.20
   0  12  -2  415.46   13.90
   0 -12   2  410.06   14.00
   0  12   3   72.79    6.60
   0  12  -3   89.29    6.50
   0  12  -3   81.89    6.00
   0 -12  -3   90.29    6.10
   0 -12   3   81.69    6.60
   0  12  -4  334.27   12.70
   0  12   4  319.17   12.50
   0  12  -4  330.97   11.90
   0 -12   4  319.67   12.40
   0 -12  -4  338.37   11.90
   0  12  -5   63.39    5.80
   0  12   5   63.79    6.20
   0  12  -5   59.69    6.00
   0 -12  -5   54.49    5.30
   0 -12   5   63.39    5.90
   0  12   6  175.28    9.10
   0  12  -6  164.08    8.80
   0  12  -6  170.28    8.30
   0 -12   6  174.38    8.80
   0 -12  -6  170.28    7.90
   0  12  -7   34.30    4.40
   0  12   7   24.40    4.60
   0  12  -7   27.50    4.60
   0 -12  -7   23.80    4.90
   0 -12  -7   35.20    4.10
   0 -12   7   27.30    4.60
   0  12   8  191.58   10.30
   0  12  -8  190.78   10.00
   0 -12  -8  177.78   10.40
   0 -12   8  189.98   10.10
   0 -12  -8  180.48    8.20
   0  12  -9  120.09    8.30
   0  12   9  104.09    8.40
   0  12  -9   97.39    7.40
   0 -12  -9   99.09    9.30
   0 -12   9   90.49    7.60
   0  12  10  106.49    9.10
   0  12 -10  108.79    9.10
   0 -12  10  121.39    9.00
   0 -12 -10   92.39    8.90
   0  12  11    3.60    5.00
   0  13   0    2.00    3.40
   0  13   0    6.60    3.40
   0 -13   0    1.10    3.50
   0  13  -1    3.50    3.60
   0  13  -1   -4.00    3.40
   0  13   1   -4.40    3.50
   0  13   1   -2.90    3.40
   0 -13   1    2.70    3.30
   0 -13  -1    1.80    3.40
   0  13  -2   -2.50    3.20
   0  13  -2    0.70    3.50
   0  13   2   -1.10    3.60
   0  13   2    1.40    3.60
   0 -13  -2    3.40    3.20
   0 -13   2   -0.40    3.60
   0  13  -3   18.40    3.90
   0  13   3    6.60    3.80
   0  13  -3   10.80    4.10
   0 -13   3    8.00    3.70
   0 -13  -3   14.40    3.60
   0  13  -4    5.20    3.60
   0  13   4    3.30    3.90
   0  13  -4   -2.60    3.50
   0 -13   4    0.40    3.40
   0 -13  -4    4.50    3.20
   0  13  -5   21.80    4.70
   0  13   5   18.60    4.40
   0  13  -5   23.70    4.30
   0 -13  -5   16.40    4.20
   0 -13   5   32.10    4.80
   0  13  -6    4.60    4.10
   0  13  -6    0.80    3.70
   0 -13  -6    0.20    3.50
   0 -13   6    2.70    3.90
   0  13   7   -0.50    4.70
   0  13  -7   10.00    4.20
   0  13  -7   10.40    4.70
   0 -13   7    6.70    4.40
   0 -13  -7   10.20    4.00
   0  13  -8    5.80    4.70
   0  13  -8   -6.00    6.40
   0  13   8    8.60    4.60
   0 -13   8    1.40    4.40
   0 -13  -8   -3.50    4.90
   0  14   0    2.70    4.40
   0  14   0    3.40    4.20
   0 -14   0    6.20    3.90
   0  14   1  196.68   10.90
   0  14  -1  205.18   10.60
   0  14   1  190.78   10.70
   0  14  -1  200.38   10.90
   0 -14   1  181.38    9.90
   0 -14  -1  177.18    9.60
   0  14   2    2.70    4.60
   0  14  -2   -2.80    4.00
   0  14   2    2.30    4.50
   0  14  -2   -4.00    4.00
   0 -14  -2   -2.60    4.00
   0 -14   2    3.00    4.20
   0  14  -3  131.79    9.20
   0  14  -3  130.29    8.60
   0  14   3  119.09    8.90
   0  14   3  150.78   10.00
   0 -14   3  149.39    9.10
   0 -14  -3  137.79    9.00
   0  14   4   -6.50    4.60
   0  14  -4   -5.80    4.40
   0  14  -4    1.40    4.40
   0 -14   4   -0.10    4.50
   0 -14  -4   -6.40    4.20
   0  14   5  192.48   11.20
   0  14  -5  156.98   10.10
   0  14  -5  162.88    9.60
   0 -14  -5  167.28    9.40
   0 -14   5  155.48   10.00
  -1   0  19    0.20    3.90
   1   0 -19    3.00    4.80
  -1   0  19   -1.50    4.20
  -1   0  18   -2.90    3.60
   1   0 -18    0.40    3.90
   1   0 -17   -4.20    3.40
  -1   0  17    0.50    3.20
   1   0 -16    6.00    3.50
  -1   0  16    4.70    3.10
   1   0 -15   -1.30    2.80
  -1   0  15   -3.90    2.20
   1   0 -14   25.80    3.60
  -1   0  14   22.50    3.40
   1   0 -13   -0.10    0.70
   1   0 -13   -1.10    0.50
   1   0 -13    0.60    2.10
  -1   0  13    0.10    1.90
   1   0 -12    0.00    0.70
   1   0 -12    0.50    1.70
  -1   0  12   -2.40    1.50
   1   0 -12    0.00    0.60
   1   0 -11   -0.50    0.80
   1   0 -11    0.10    0.60
  -1   0  11    0.50    1.40
   1   0 -11   -0.10    1.70
  -1   0  10    4.00    1.60
   1   0 -10    4.60    1.80
  -1   0  10    2.40    1.40
   1   0 -10    4.80    0.70
   1   0 -10    5.70    1.50
   1   0  -9   -0.80    1.00
   1   0  -9   -0.70    1.20
   1   0  -9    0.10    0.60
  -1   0   9   -1.80    1.00
  -1   0   9    1.10    1.20
   1   0  -8   39.90    2.80
  -1   0   8   44.30    2.90
  -1   0   8   46.40    2.60
   1   0  -8   40.60    2.80
  -1   0   8   39.10    2.70
   1   0  -8   39.10    2.80
   1   0  -8   41.80    1.70
   1   0  -7   -0.80    1.00
  -1   0   7   -1.90    1.00
   1   0  -7   -1.40    0.80
   1   0  -7   -0.60    0.90
  -1   0   7   -0.70    0.90
   1   0  -7   -0.50    0.40
  -1   0   7   -1.50    0.80
  -1   0   6   41.40    2.40
  -1   0   6   43.60    2.10
  -1   0   6   49.10    2.60
   1   0  -6   43.60    2.40
   1   0  -6   46.10    2.50
   1   0  -6   43.70    2.20
   1   0  -6   47.80    1.70
   1   0  -5   -3.60    0.30
   1   0  -5   -4.80    0.60
  -1   0   5   -4.40    0.60
  -1   0   5   -4.00    0.30
   1   0  -5   -3.90    0.50
  -1   0   5   -3.70    0.50
   1   0  -5   -3.90    0.60
  -1   0   5   -3.40    0.70
   1   0  -4  130.79    4.30
   1   0  -4  137.69    3.60
  -1   0   4  134.59    3.60
  -1   0   4  139.79    4.30
  -1   0   4  132.79    4.20
   1   0  -4  138.09    4.00
  -1   0   4  137.49    4.00
   1   0  -4  134.59    4.20
  -1   0   3   -7.10    0.40
   1   0  -3   -6.40    0.50
  -1   0   3   -6.70    0.50
  -1   0   3   -6.30    0.30
   1   0  -3   -6.30    0.40
   1   0  -3   -6.50    0.20
   1   0  -3   -6.40    0.30
  -1   0   3   -6.50    0.20
  -1   0   2    0.10    0.20
   1   0  -2    0.10    0.20
   1   0  -2    0.30    0.30
  -1   0   2    0.10    0.20
   1   0  -2    0.00    0.30
  -1   0   2    0.30    0.30
   1   0   1    0.00    0.20
  -1   0  -1    0.20    0.20
  -1   0  -1    0.40    0.20
   1   0   1   -0.10    0.10
   1   0   1    0.20    0.10
   1   0   2    7.20    0.40
   1   0   2    6.60    0.60
   1   0   2    6.90    0.60
  -1   0  -2    7.30    0.60
  -1   0  -2    7.00    0.60
  -1   0  -2    7.30    0.70
   1   0   2    7.60    0.60
  -1   0  -2    7.70    0.40
  -1   0  -3   -1.30    0.20
  -1   0  -3   -0.70    0.50
  -1   0  -3   -1.60    0.40
   1   0   3   -1.30    0.40
   1   0   3   -1.60    0.20
  -1   0  -3   -1.10    0.40
   1   0   3   -1.70    0.40
   1   0   4  279.47    7.50
   1   0   4  266.27    7.60
  -1   0  -4  284.17    7.60
  -1   0  -4  271.07    6.80
   1   0   4  273.57    6.80
  -1   0  -4  272.37    7.50
  -1   0  -4  277.57    7.60
   1   0   4  275.17    7.60
   1   0   5   -1.30    0.80
  -1   0  -5   -0.50    0.60
  -1   0  -5   -1.40    0.30
   1   0   5   -1.20    0.60
   1   0   5   -1.50    0.70
   1   0   5   -1.20    0.30
  -1   0  -5   -1.60    0.70
  -1   0  -5   -1.10    0.70
   1   0   6    8.70    1.40
   1   0   6    8.20    1.20
  -1   0  -6    7.20    1.30
   1   0   6    6.80    0.60
   1   0   6    6.20    1.50
  -1   0  -6    6.90    1.20
  -1   0  -6    5.80    1.20
  -1   0  -6    6.20    0.70
   1   0   7    1.60    1.20
  -1   0  -7   -0.20    0.40
   1   0   7   -0.50    1.10
  -1   0  -7    0.60    1.10
   1   0   7    0.50    0.90
  -1   0  -7   -0.60    1.00
   1   0   7    0.00    0.40
  -1   0  -7   -1.50    1.00
   1   0   8   36.80    2.70
  -1   0  -8   37.00    2.60
  -1   0  -8   39.50    2.70
   1   0   8   35.50    1.40
   1   0   8   35.20    2.50
  -1   0  -8   33.60    2.70
   1   0   8   37.70    2.80
  -1   0  -8   36.10    1.40
  -1   0  -9    0.20    1.20
   1   0   9    0.50    1.50
  -1   0  -9   -0.30    0.50
   1   0   9   -0.80    1.20
  -1   0  -9   -0.50    1.40
  -1   0 -10    8.90    1.90
   1   0  10    6.60    1.90
  -1   0 -10    9.50    2.00
  -1   0 -10   10.60    0.90
  -1   0 -11    0.00    0.50
   1   0  11   -0.80    1.50
  -1   0 -11   -3.50    1.50
  -1   0 -11   -1.20    1.80
  -1   0 -11    0.70    0.40
  -1   0 -12    5.80    2.10
   1   0  12    6.00    2.10
  -1   0 -12    9.80    2.40
  -1   0 -13    0.20    2.00
   1   0  13   -1.90    1.90
  -1   0 -13    1.80    2.20
   1   0  14   19.30    3.40
  -1   0 -14   24.00    3.80
   1   0  15   -1.90    2.80
  -1   0 -15   -3.30    2.80
   1   0  16    5.10    3.10
  -1   0 -16    6.50    3.30
  -1   0 -17   -4.80    3.40
   1   0  17    2.70    3.40
  -1   0 -18    7.00    4.30
   1   0  18   -5.00    3.70
  -1   0 -19   12.50    5.20
   1   0  19   -1.40    4.50
  -1   1  19  127.99    8.90
   1   1 -19  134.09    9.50
  -1   1  19  129.29    8.40
   1  -1 -19  128.29    9.70
  -1  -1  19  147.79    8.40
  -1  -1  19  116.99    8.80
  -1   1  18   29.70    5.00
  -1   1  18   35.00    4.80
   1   1 -18   38.60    5.70
   1  -1 -18   33.60    5.40
  -1  -1  18   37.30    5.30
   1   1 -17  167.88    9.30
  -1   1  17  181.78    8.30
  -1   1  17  153.18    8.60
  -1  -1  17  177.78    8.90
   1  -1 -17  165.78    9.70
  -1   1  16   96.29    6.40
   1   1 -16  103.39    7.30
   1  -1 -16   85.39    6.70
  -1  -1  16   92.59    6.90
  -1   1  15  145.59    7.30
   1   1 -15  163.38    8.40
  -1  -1  15  139.19    7.30
   1  -1 -15  140.39    8.00
   1   1 -14  112.19    6.50
  -1   1  14  109.79    6.00
   1   1 -14  107.59    3.70
   1  -1 -14  103.29    6.30
  -1  -1  14  111.99    6.20
  -1   1  13  266.67    9.70
   1   1 -13  263.27   10.00
   1   1 -13  265.67    7.50
   1   1 -13  268.77    9.20
  -1  -1  13  269.77    9.80
   1  -1 -13  273.97   10.20
   1   1 -12   92.59    3.40
   1   1 -12   86.19    5.10
  -1   1  12   91.79    5.00
   1   1 -12   87.39    4.50
   1  -1 -12   93.79    5.50
  -1  -1  12   89.29    5.00
   1   1 -11  284.27    7.70
  -1   1  11  270.57    9.30
   1   1 -11  280.57    8.80
   1   1 -11  289.07    9.70
  -1  -1  11  266.87    8.60
  -1  -1  11  275.47    9.30
   1  -1 -11  268.07    9.60
  -1   1  10   64.69    3.90
   1   1 -10   65.49    2.70
   1   1 -10   58.69    3.80
  -1   1  10   64.29    3.70
   1   1 -10   63.19    3.40
   1  -1 -10   65.49    4.00
  -1  -1  10   64.19    3.50
  -1  -1  10   66.79    2.60
  -1  -1  10   66.49    3.80
  -1   1   9  265.47    8.20
   1   1  -9  249.97    8.50
  -1   1   9  266.97    8.40
   1   1  -9  270.17    7.20
   1   1  -9  264.27    7.90
   1  -1  -9  260.57    6.30
  -1  -1   9  251.57    8.30
  -1  -1   9  257.67    7.10
   1  -1  -9  243.68    8.50
   1  -1  -9  263.17    6.30
  -1  -1   9  266.87    7.80
   1   1  -8  130.79    5.20
   1   1  -8  130.19    5.00
   1   1  -8  128.49    4.50
   1   1  -8  132.29    4.00
  -1   1   8  138.79    5.30
  -1   1   8  132.69    4.80
  -1   1   8  124.69    4.90
   1  -1  -8  128.09    3.30
  -1  -1   8  128.29    4.00
   1  -1  -8  131.09    3.30
  -1  -1   8  133.29    4.60
   1  -1  -8  126.39    5.20
   1  -1  -8  124.99    4.90
  -1  -1   8  125.99    4.90
  -1  -1   8  125.89    5.00
  -1   1   7  171.88    5.70
   1   1  -7  175.48    4.90
  -1   1   7  178.38    5.60
   1   1  -7  162.78    5.80
  -1   1   7  170.88    5.90
   1   1  -7  175.68    5.70
   1   1  -7  166.38    5.20
   1  -1  -7  149.19    5.70
   1  -1  -7  175.88    5.70
   1  -1  -7  177.08    4.30
   1  -1  -7  168.88    4.30
  -1  -1   7  166.48    4.80
  -1  -1   7  162.38    5.70
  -1  -1   7  183.18    5.30
  -1  -1   7  170.08    5.70
  -1   1   6    7.70    1.20
  -1   1   6    6.20    1.30
  -1   1   6    6.50    1.10
   1   1  -6    6.50    1.00
   1   1  -6    7.50    1.30
   1   1  -6    7.00    0.80
   1   1  -6    8.70    1.30
   1  -1  -6    5.20    1.20
   1  -1  -6    7.30    0.50
  -1  -1   6    7.10    0.90
  -1  -1   6    7.20    1.00
   1  -1  -6    7.40    1.30
  -1  -1   6    5.30    1.10
  -1  -1   6    6.30    1.30
   1  -1  -6    7.30    0.50
  -1   1   5  251.37    7.10
  -1   1   5  249.18    7.00
   1   1  -5  237.98    7.20
   1   1  -5  244.38    6.70
  -1   1   5  253.17    7.30
   1   1  -5  255.97    7.10
   1  -1  -5  247.68    6.10
  -1  -1   5  256.77    7.20
  -1  -1   5  244.68    6.60
   1  -1  -5  247.78    7.30
  -1  -1   5  249.08    7.20
   1  -1  -5  252.97    6.10
  -1  -1   5  252.87    6.70
   1  -1  -5  250.67    7.00
  -1   1   4   32.80    1.60
   1   1  -4   31.80    1.70
  -1   1   4   33.00    1.60
   1   1  -4   33.00    1.80
   1   1  -4   33.50    1.40
   1   1  -4   32.90    1.40
  -1   1   4   33.50    1.80
  -1  -1   4   33.00    1.40
  -1  -1   4   31.70    1.70
   1  -1  -4   33.80    1.10
   1  -1  -4   35.70    1.70
  -1  -1   4   33.50    1.70
   1  -1  -4   29.80    1.80
  -1  -1   4   34.80    1.40
   1   1  -3   47.20    1.90
  -1   1   3   47.70    1.40
  -1   1   3   46.40    1.80
  -1   1   3   46.20    1.90
   1   1  -3   45.30    1.50
   1   1  -3   46.20    1.60
  -1   1   3   45.20    1.80
  -1  -1   3   47.60    1.50
  -1  -1   3   47.00    1.90
   1  -1  -3   46.30    1.40
  -1  -1   3   46.60    1.60
   1  -1  -3   47.30    2.00
  -1  -1   3   42.60    1.80
   1  -1  -3   45.80    1.80
   1   1  -2    1.00    0.40
  -1   1   2    0.20    0.20
  -1   1   2    0.50    0.30
   1   1  -2    0.30    0.20
  -1   1   2    0.10    0.20
   1   1  -2    0.40    0.30
   1   1  -2    0.40    0.30
  -1   1   2   -0.20    0.30
  -1  -1   2    0.20    0.30
   1  -1  -2    0.20    0.30
   1  -1  -2    0.10    0.30
  -1  -1   2    0.50    0.20
   1  -1  -2    0.20    0.30
  -1  -1   2    0.20    0.30
  -1  -1   2    0.20    0.30
   1  -1  -2    0.60    0.20
  -1   1   1   14.40    0.70
  -1   1   1   13.50    0.60
   1   1  -1   13.10    0.60
   1   1  -1   13.90    0.50
  -1   1   1   13.60    0.70
  -1   1   1   13.60    0.50
   1   1  -1   15.00    0.70
   1   1  -1   14.50    0.70
  -1  -1   1   14.60    0.70
   1  -1  -1   14.00    0.60
  -1  -1   1   13.50    0.70
  -1  -1   1   14.30    0.60
   1  -1  -1   14.40    0.70
   1  -1  -1   13.90    0.70
   1  -1  -1   13.70    0.70
  -1  -1   1   13.30    0.70
   1   1   0   -1.30    0.30
  -1   1   0   -1.00    0.20
  -1   1   0   -1.00    0.30
   1   1   0   -1.30    0.20
   1   1   0   -1.50    0.10
   1  -1   0   -1.00    0.30
   1  -1   0   -1.20    0.20
   1  -1   0   -1.00    0.30
   1   1   1   68.69    2.00
  -1   1  -1   67.79    2.00
   1   1   1   68.29    2.20
  -1   1  -1   70.89    2.00
  -1   1  -1   67.99    2.10
   1   1   1   67.09    1.90
  -1   1  -1   68.89    2.10
   1   1   1   70.89    2.20
  -1  -1  -1   73.29    1.90
  -1  -1  -1   69.99    2.00
  -1  -1  -1   70.29    2.20
   1  -1   1   71.39    2.10
   1  -1   1   69.19    2.10
  -1  -1  -1   68.49    2.20
   1  -1   1   68.29    2.00
   1  -1   1   69.59    2.10
   1   1   2   83.69    2.70
   1   1   2   80.19    2.60
  -1   1  -2   79.09    2.50
  -1   1  -2   78.39    2.50
  -1   1  -2   82.89    2.40
  -1   1  -2   77.59    2.50
   1   1   2   79.59    2.50
   1   1   2   80.29    2.10
   1  -1   2   79.99    2.50
  -1  -1  -2   82.49    2.50
   1  -1   2   82.79    2.50
  -1  -1  -2   79.69    2.60
   1  -1   2   82.79    2.50
   1  -1   2   81.49    2.40
  -1  -1  -2   81.29    2.10
  -1  -1  -2   81.99    2.70
   1   1   3  159.88    4.80
  -1   1  -3  172.68    4.80
   1   1   3  166.98    4.80
  -1   1  -3  168.18    4.70
  -1   1  -3  167.58    4.50
   1   1   3  168.38    4.80
  -1   1  -3  170.18    4.80
   1  -1   3  167.98    4.50
   1  -1   3  166.18    4.80
  -1  -1  -3  158.08    4.90
  -1  -1  -3  168.58    4.90
  -1  -1  -3  173.18    4.80
   1   1   4  109.19    3.70
  -1   1  -4  111.59    3.60
   1   1   4  117.99    3.90
  -1   1  -4  120.89    3.80
  -1   1  -4  115.89    3.30
  -1   1  -4  116.69    3.70
   1   1   4  115.09    3.80
  -1  -1  -4  115.19    3.70
   1  -1   4  109.19    3.70
   1  -1   4  116.29    3.60
   1  -1   4  112.39    3.70
  -1  -1  -4  108.79    3.70
   1  -1   4  112.79    3.30
  -1  -1  -4  108.69    3.80
   1   1   5  270.27    7.60
  -1   1  -5  278.27    7.60
   1   1   5  279.87    7.80
  -1   1  -5  252.77    7.40
   1   1   5  267.07    7.60
  -1   1  -5  260.57    7.60
   1  -1   5  269.97    7.60
  -1  -1  -5  263.67    7.50
   1  -1   5  260.97    7.60
   1  -1   5  267.07    6.90
  -1  -1  -5  269.97    7.80
  -1  -1  -5  255.47    7.60
   1  -1   5  269.37    7.40
  -1   1  -6  513.25   13.50
   1   1   6  515.45   13.80
   1   1   6  530.25   13.70
  -1   1  -6  529.55   13.70
   1   1   6  469.75   14.20
  -1   1  -6  537.15   12.80
  -1   1  -6  508.95   13.70
  -1  -1  -6  487.95   13.90
  -1  -1  -6  501.45   13.70
  -1  -1  -6  542.35   13.70
   1  -1   6  517.85   13.60
   1  -1   6  513.25   12.80
   1  -1   6  487.15   13.70
   1  -1   6  539.45   13.50
   1   1   7  317.37    9.30
  -1   1  -7  283.77    9.60
  -1   1  -7  317.77    8.30
   1   1   7  327.07    9.20
  -1   1  -7  326.27    9.50
   1   1   7  328.77    9.50
  -1   1  -7  321.97    9.30
  -1  -1  -7  311.37    9.30
   1  -1   7  320.27    8.30
  -1  -1  -7  314.77    9.50
   1  -1   7  330.37    9.10
  -1  -1  -7  318.37    9.30
   1  -1   7  315.47    9.30
   1  -1   7  305.97    9.20
  -1   1  -8  202.88    5.60
   1   1   8  194.58    6.70
   1   1   8  207.08    7.00
  -1   1  -8  192.18    6.80
  -1   1  -8  198.48    6.70
   1   1   8  194.78    6.60
  -1   1  -8  205.08    6.60
  -1  -1  -8  197.68    6.70
   1  -1   8  194.88    6.80
  -1  -1  -8  202.28    6.90
   1  -1   8  197.28    5.50
   1  -1   8  202.08    6.80
   1  -1   8  207.78    6.50
  -1  -1  -8  198.98    6.80
  -1   1  -9  398.06   10.10
   1   1   9  387.66   11.60
  -1   1  -9  394.86   11.30
   1   1   9  382.66   11.40
  -1   1  -9  373.46   11.60
  -1  -1  -9  398.16   11.90
   1  -1   9  390.36   11.60
   1  -1   9  392.86   11.20
  -1  -1  -9  392.86   11.50
   1  -1   9  399.06   10.10
   1   1  10  192.78    7.20
  -1   1 -10  208.28    5.80
  -1   1 -10  198.98    7.50
  -1   1 -10  199.38    7.10
  -1  -1 -10  214.18    7.80
   1  -1  10  198.08    7.30
  -1  -1 -10  194.78    7.30
   1  -1  10  202.58    5.70
  -1   1 -11  446.66   13.80
  -1   1 -11  483.45   13.50
  -1   1 -11  456.25   11.70
   1   1  11  436.46   13.60
  -1  -1 -11  446.96   14.00
   1  -1  11  442.16   13.70
   1  -1  11  462.25   11.60
  -1  -1 -11  461.65   13.70
   1   1  12   91.99    5.20
  -1   1 -12  102.49    5.50
  -1   1 -12   96.79    3.40
  -1   1 -12   91.29    5.00
  -1  -1 -12  107.49    5.80
   1  -1  12   94.99    5.30
   1   1  13  315.67   11.10
  -1   1 -13  321.27    8.40
  -1   1 -13  310.17   10.60
  -1   1 -13  320.67   11.40
   1  -1  13  324.77   11.20
  -1  -1 -13  323.77   11.50
  -1   1 -14  112.19    6.10
  -1   1 -14  105.39    3.60
   1   1  14  115.29    6.30
  -1   1 -14  107.89    6.70
   1  -1  14  104.79    6.40
  -1  -1 -14  112.89    6.60
  -1   1 -15  154.88    7.60
   1   1  15  145.89    8.90
  -1   1 -15  162.18    8.30
  -1  -1 -15  149.19    8.30
   1  -1  15  151.08    7.90
   1   1  16   71.79    6.00
  -1   1 -16   63.09    6.60
  -1  -1 -16   57.49    6.10
   1  -1  16   64.29    5.80
  -1   1 -17  158.48    9.50
   1   1  17  178.58    9.10
   1  -1  17  153.88    8.80
  -1  -1 -17  161.18    9.60
  -1   1 -18   35.80    5.90
   1   1  18   47.00    5.70
   1  -1  18   40.10    5.50
  -1  -1 -18   60.09    7.20
  -1   1 -19   59.79    7.30
   1   1  19   65.59    7.90
   1   1  19   67.69    7.90
   1  -1  19   60.79    7.10
  -1  -1 -19   58.59    7.40
   1   2 -19    7.70    5.50
  -1   2  19    8.40    4.40
  -1   2  19    2.10    4.30
   1  -2 -19   -0.80    4.70
  -1  -2  19    3.70    4.50
   1   2 -18   -1.70    4.00
  -1   2  18    4.30    4.00
  -1   2  18   -2.50    3.60
  -1  -2  18   10.20    4.10
   1  -2 -18   -0.80    4.40
  -1   2  17   -4.70    3.00
   1   2 -17    2.00    3.70
   1  -2 -17   -1.10    3.50
  -1  -2  17    4.40    3.50
  -1   2  16   -0.70    2.70
  -1   2  16   -0.10    2.60
   1   2 -16    2.60    3.10
   1  -2 -16    4.80    3.30
  -1  -2  16    0.70    2.80
  -1   2  15    3.90    2.30
   1   2 -15    1.20    2.70
  -1   2  15   -1.30    2.30
   1  -2 -15   -2.20    2.50
  -1  -2  15    0.40    2.60
   1   2 -14   15.60    3.20
   1   2 -14   14.40    2.80
  -1   2  14   19.90    3.10
  -1   2  14   18.10    3.10
  -1  -2  14   15.20    3.10
   1  -2 -14   21.10    3.60
  -1   2  13    1.60    2.00
   1   2 -13    2.50    1.90
   1   2 -13    1.00    1.60
   1   2 -13    3.70    2.30
  -1  -2  13    1.60    2.00
   1  -2 -13    0.00    2.00
  -1  -2  13    1.40    1.40
   1   2 -12   -0.20    1.40
   1   2 -12   -2.50    1.60
  -1   2  12   -1.50    1.60
   1   2 -12    1.00    1.60
   1  -2 -12   -2.60    1.80
  -1  -2  12    1.30    1.80
  -1  -2  12   -1.00    1.30
   1   2 -11   10.20    2.10
   1   2 -11   10.60    1.80
  -1   2  11    6.30    1.90
   1   2 -11    8.40    1.60
  -1  -2  11    8.80    2.00
  -1  -2  11    6.40    2.00
   1  -2 -11    9.80    2.20
   1   2 -10   27.80    2.30
  -1   2  10   28.40    2.70
   1   2 -10   22.90    2.70
   1   2 -10   26.90    2.50
  -1  -2  10   31.50    2.60
   1  -2 -10   24.30    2.90
  -1  -2  10   27.90    3.00
  -1  -2  10   29.60    2.10
   1   2  -9    0.30    1.20
  -1   2   9    0.20    1.20
   1   2  -9   -1.30    1.00
  -1   2   9    1.90    1.60
  -1  -2   9    2.10    1.20
  -1  -2   9   -0.50    1.10
   1  -2  -9    2.70    1.30
  -1  -2   9   -1.60    0.80
  -1   2   8   28.20    2.50
   1   2  -8   30.30    2.00
   1   2  -8   35.10    2.10
  -1   2   8   30.20    2.80
   1   2  -8   31.00    2.60
   1   2  -8   31.00    2.60
  -1   2   8   29.90    2.40
  -1  -2   8   29.70    2.40
  -1  -2   8   32.20    2.70
  -1  -2   8   31.10    1.90
  -1  -2   8   35.40    2.20
   1  -2  -8   32.70    2.60
   1  -2  -8   33.30    2.70
  -1   2   7    2.80    1.20
   1   2  -7    3.00    1.10
   1   2  -7    2.40    0.90
   1   2  -7    0.10    0.90
   1   2  -7    0.40    1.20
  -1   2   7    4.40    1.30
  -1   2   7   -0.30    0.90
   1  -2  -7    2.20    0.30
  -1  -2   7    1.60    0.90
  -1  -2   7    3.80    1.30
   1  -2  -7    1.50    0.30
   1  -2  -7    1.80    1.10
   1  -2  -7    0.60    1.00
  -1  -2   7   -0.90    0.70
  -1  -2   7    0.50    1.00
   1   2  -6   20.80    1.50
  -1   2   6   19.00    1.80
  -1   2   6   17.60    1.70
  -1   2   6   17.10    1.90
   1   2  -6   18.20    1.40
   1   2  -6   12.30    1.60
   1  -2  -6   15.20    1.60
  -1  -2   6   22.20    1.90
  -1  -2   6   18.00    1.40
  -1  -2   6   17.20    1.40
   1  -2  -6   18.50    1.90
  -1  -2   6   16.40    1.70
   1  -2  -6   18.70    0.80
  -1   2   5   -0.80    0.30
  -1   2   5   -2.20    0.70
   1   2  -5   -2.10    0.60
   1   2  -5   -1.10    0.50
   1   2  -5   -1.60    0.60
  -1   2   5   -1.40    0.60
  -1   2   5   -1.30    0.90
   1   2  -5   -0.90    0.70
  -1   2   5   -1.10    0.70
   1  -2  -5   -1.10    0.70
  -1  -2   5   -0.40    0.80
   1  -2  -5   -0.20    0.80
   1  -2  -5   -0.80    0.30
  -1  -2   5   -1.60    0.60
  -1  -2   5   -1.10    0.70
  -1  -2   5   -1.10    0.50
   1   2  -4  123.59    3.90
  -1   2   4  115.29    3.70
   1   2  -4  116.79    4.00
   1   2  -4  121.89    3.70
  -1   2   4  120.59    4.10
   1   2  -4  121.29    3.50
  -1   2   4  119.29    3.30
  -1   2   4  115.59    3.90
   1  -2  -4  121.19    3.70
  -1  -2   4  125.39    3.50
  -1  -2   4  114.79    3.80
  -1  -2   4  114.49    3.70
   1  -2  -4  115.39    4.10
  -1  -2   4  115.39    3.90
   1  -2  -4  114.69    3.20
   1   2  -3    4.30    0.90
  -1   2   3    5.80    0.70
  -1   2   3    8.00    1.20
   1   2  -3    4.80    1.00
   1   2  -3    6.50    1.00
   1   2  -3    6.50    0.70
  -1   2   3    5.70    1.00
  -1   2   3    5.50    0.80
   1  -2  -3    3.60    0.80
  -1  -2   3    9.00    1.10
  -1  -2   3    4.10    0.90
   1  -2  -3    6.70    0.70
  -1  -2   3    5.20    0.90
  -1  -2   3    6.20    0.70
   1  -2  -3    5.20    1.10
  -1   2   2   20.10    1.30
  -1   2   2   20.90    1.00
   1   2  -2   20.40    1.00
   1   2  -2   18.30    1.10
  -1   2   2   20.90    0.90
  -1   2   2   20.20    1.20
   1   2  -2   20.20    1.00
   1   2  -2   19.40    1.20
   1  -2  -2   19.40    1.30
  -1  -2   2   20.10    1.00
  -1  -2   2   19.20    1.00
   1  -2  -2   21.10    0.90
  -1  -2   2   19.80    1.20
   1  -2  -2   22.00    1.30
  -1  -2   2   20.10    1.20
   1  -2  -2   18.40    1.00
  -1   2   1   23.50    1.20
   1   2  -1   19.20    1.30
  -1   2   1   22.60    0.80
   1   2  -1   22.90    1.30
   1   2  -1   21.30    1.10
   1   2  -1   23.20    1.00
  -1   2   1   23.50    1.30
  -1   2   1   21.30    1.30
   1  -2  -1   21.80    1.30
   1  -2  -1   20.60    1.40
   1  -2  -1   22.40    0.80
  -1  -2   1   20.90    0.90
   1  -2  -1   21.50    1.20
  -1  -2   1   19.40    1.20
  -1  -2   1   22.10    1.10
  -1   2   0   38.10    1.50
   1   2   0   35.30    1.50
  -1   2   0   34.70    1.50
   1   2   0   35.80    1.10
  -1   2   0   35.70    1.50
   1   2   0   34.30    1.60
   1   2   0   35.80    1.40
  -1  -2   0   35.60    1.40
   1  -2   0   31.50    1.10
   1  -2   0   36.60    1.50
  -1  -2   0   33.40    1.40
   1  -2   0   36.80    1.50
   1  -2   0   32.50    1.50
  -1  -2   0   35.10    1.10
   1  -2   0   34.40    1.00
  -1   2  -1   11.70    0.90
  -1   2  -1   12.10    0.70
  -1   2  -1   12.20    0.90
   1   2   1   11.50    0.90
   1   2   1   11.50    0.70
   1   2   1   11.80    0.80
   1  -2   1   11.40    0.90
  -1  -2  -1   12.50    1.00
  -1  -2  -1   11.40    0.80
   1  -2   1   12.20    0.90
   1  -2   1   12.10    0.70
  -1   2  -2    0.60    0.50
   1   2   2    0.30    0.40
   1   2   2    0.70    0.70
  -1   2  -2   -0.50    0.60
  -1   2  -2   -0.60    0.50
   1   2   2   -0.40    0.70
  -1   2  -2   -0.30    0.60
   1   2   2    0.10    0.50
   1  -2   2    0.00    0.60
  -1  -2  -2   -0.10    0.70
  -1  -2  -2    0.20    0.50
  -1  -2  -2    0.30    0.40
   1  -2   2   -0.10    0.50
   1   2   3   10.40    1.20
  -1   2  -3    9.20    1.00
   1   2   3    8.00    0.60
  -1   2  -3   10.10    1.10
  -1   2  -3    8.50    1.00
  -1   2  -3    9.80    0.90
   1   2   3    8.20    1.00
   1   2   3    9.80    1.20
   1  -2   3    8.30    1.00
   1  -2   3    8.20    1.00
  -1  -2  -3    8.90    0.60
  -1  -2  -3   10.00    1.20
   1  -2   3   11.00    1.00
  -1  -2  -3    8.00    1.00
   1  -2   3   10.70    1.10
  -1   2  -4   21.80    1.40
   1   2   4   22.80    1.80
  -1   2  -4   20.50    1.50
   1   2   4   24.70    1.70
  -1   2  -4   17.80    1.40
   1   2   4   18.30    1.40
   1   2   4   20.60    0.80
  -1   2  -4   20.80    1.40
  -1  -2  -4   20.40    0.80
   1  -2   4   18.40    1.50
   1  -2   4   20.00    1.30
   1  -2   4   18.10    1.50
  -1  -2  -4   20.00    1.50
  -1  -2  -4   21.30    1.70
   1  -2   4   21.20    1.40
  -1   2  -5   15.20    1.40
   1   2   5   19.20    1.80
   1   2   5   13.70    1.70
  -1   2  -5   16.70    1.50
  -1   2  -5   16.30    1.60
   1   2   5   15.10    1.40
  -1   2  -5   16.70    1.50
   1  -2   5   13.20    1.20
  -1  -2  -5   16.00    1.50
   1  -2   5   17.40    1.50
  -1  -2  -5   17.80    1.80
   1  -2   5   18.60    1.60
   1  -2   5   13.50    1.60
   1   2   6   15.50    2.10
  -1   2  -6   16.40    1.90
   1   2   6   16.10    1.90
  -1   2  -6   17.50    1.60
  -1   2  -6   15.40    2.00
  -1   2  -6   18.00    1.50
   1  -2   6   21.20    1.90
   1  -2   6   15.50    1.40
   1  -2   6   16.40    1.70
  -1  -2  -6   17.20    1.90
   1  -2   6   16.10    1.70
  -1  -2  -6   20.00    1.80
   1   2   7   11.30    1.80
  -1   2  -7   12.90    1.50
  -1   2  -7   11.70    1.80
   1   2   7   14.80    1.90
   1   2   7    9.20    1.50
  -1   2  -7   12.20    1.80
  -1   2  -7   10.80    1.50
   1  -2   7   10.90    1.40
  -1  -2  -7   12.50    1.70
  -1  -2  -7   13.20    1.80
   1  -2   7   11.90    1.60
   1  -2   7    7.90    1.50
   1  -2   7   14.10    1.80
  -1   2  -8    0.20    1.10
  -1   2  -8    0.10    1.50
   1   2   8   -0.80    1.50
   1   2   8    1.20    1.40
   1   2   8   -1.10    1.00
  -1   2  -8   -0.20    1.20
  -1   2  -8   -0.60    0.90
   1  -2   8    0.20    1.40
  -1  -2  -8   -1.00    1.20
  -1  -2  -8   -1.60    1.00
   1  -2   8   -0.50    0.80
   1  -2   8   -2.10    0.90
   1  -2   8   -0.70    1.20
  -1   2  -9   26.30    2.40
   1   2   9   24.50    2.50
  -1   2  -9   28.70    2.10
  -1   2  -9   27.80    2.70
   1  -2   9   23.30    2.60
   1  -2   9   25.90    2.60
  -1  -2  -9   23.00    2.70
   1  -2   9   24.60    1.90
  -1   2 -10   27.50    2.30
  -1   2 -10   22.00    2.60
   1   2  10   28.50    2.90
  -1   2 -10   25.50    3.10
   1  -2  10   24.00    2.60
   1  -2  10   27.80    3.00
   1  -2  10   28.60    2.10
  -1  -2 -10   29.90    3.10
  -1   2 -11   14.60    1.80
   1   2  11   12.10    2.30
  -1   2 -11   14.10    2.20
  -1   2 -11   13.00    2.60
   1  -2  11    9.30    1.50
   1  -2  11   13.20    2.40
  -1  -2 -11   13.70    2.50
  -1   2 -12   18.00    2.50
  -1   2 -12   22.20    2.60
  -1   2 -12   23.20    3.10
   1   2  12   27.90    3.40
   1  -2  12   20.90    2.40
  -1  -2 -12   21.30    3.10
   1  -2  12   20.20    3.00
  -1   2 -13   -0.70    2.00
  -1   2 -13   -0.70    2.00
   1   2  13   -0.10    1.90
   1  -2  13    2.10    2.10
  -1  -2 -13   -1.10    2.30
   1  -2  13   -1.40    1.80
  -1   2 -14    0.90    2.50
  -1   2 -14    3.30    2.40
   1   2  14   -1.00    2.20
  -1  -2 -14    0.30    2.70
   1  -2  14    0.70    2.30
   1   2  15    2.60    3.10
  -1   2 -15   -1.20    2.70
  -1   2 -15    6.50    2.90
  -1  -2 -15   -2.80    3.10
   1  -2  15    6.90    3.00
   1   2  16    4.70    3.00
  -1   2 -16    1.40    3.10
  -1   2 -16    2.70    3.30
   1  -2  16   -1.70    2.80
  -1  -2 -16   -0.60    3.30
  -1   2 -17    5.50    4.00
   1   2  17    1.20    3.40
   1   2  17    5.30    3.50
  -1  -2 -17    6.30    3.70
   1  -2  17    6.20    3.60
  -1   2 -18    1.20    4.50
   1   2  18   -3.90    3.70
   1   2  18    2.80    4.00
   1  -2  18   -0.80    4.00
  -1  -2 -18    6.50    4.70
  -1   3  19    2.50    4.20
  -1   3  19   -8.40    4.20
   1   3 -19    6.40    5.20
  -1  -3  19    7.80    4.90
   1  -3 -19   -4.20    4.80
  -1   3  18  134.09    8.50
   1   3 -18  127.19    9.80
  -1   3  18  142.09    8.60
   1  -3 -18  129.59    9.30
  -1  -3  18  140.29    8.80
  -1   3  17    9.50    3.50
   1   3 -17   14.20    4.40
  -1   3  17   12.60    3.70
  -1  -3  17    9.70    3.90
   1  -3 -17   17.50    4.60
  -1   3  16  292.07   11.00
  -1   3  16  269.37   11.10
   1   3 -16  296.57   12.00
   1  -3 -16  295.87   12.10
  -1  -3  16  273.27   11.30
   1   3 -15    9.00    2.70
  -1   3  15    6.90    2.80
  -1   3  15    6.20    2.80
   1   3 -15    4.70    2.90
  -1   3  14  377.66   12.70
   1   3 -14  397.36   13.70
   1   3 -14  379.56   12.10
  -1   3  14  397.36   13.00
  -1  -3  14  396.06   13.30
   1  -3 -14  380.96   13.60
  -1  -3  14  386.16   11.10
   1   3 -13   19.50    2.60
  -1   3  13   16.20    2.80
   1   3 -13   15.50    3.10
   1   3 -13   14.30    2.40
  -1   3  13   16.10    2.80
  -1  -3  13   16.10    2.10
   1  -3 -13   15.90    3.20
  -1  -3  13   20.00    3.20
   1   3 -12  224.18    7.70
  -1   3  12  226.28    8.30
  -1   3  12  222.98    8.20
   1   3 -12  232.68    8.90
   1   3 -12  225.48    7.40
   1  -3 -12  212.78    8.90
  -1  -3  12  233.78    8.60
  -1  -3  12  222.78    7.10
   1   3 -11    0.60    1.40
  -1   3  11    0.20    1.60
  -1   3  11    0.50    1.60
   1   3 -11   -0.70    1.60
   1   3 -11    1.30    1.70
  -1  -3  11    0.40    1.40
  -1  -3  11    0.40    1.70
   1  -3 -11   -2.30    1.60
  -1  -3  11    0.00    1.10
   1   3 -10  458.45   12.30
   1   3 -10  447.26   13.50
   1   3 -10  440.16   12.30
  -1   3  10  435.76   13.00
  -1   3  10  434.06   12.90
  -1  -3  10  453.95   12.20
   1  -3 -10  427.26   13.60
  -1  -3  10  438.96   13.10
  -1  -3  10  450.45   12.10
  -1   3   9    6.40    1.60
   1   3  -9    4.20    1.50
   1   3  -9    6.20    1.70
  -1   3   9    3.70    1.40
   1  -3  -9    3.20    1.60
  -1  -3   9    4.30    1.40
  -1  -3   9    6.20    1.40
  -1  -3   9    4.20    1.20
   1   3  -8  291.77    8.40
  -1   3   8  303.57    9.10
   1   3  -8  289.47    9.30
  -1   3   8  300.77    8.90
  -1   3   8  289.07    9.10
   1   3  -8  289.77    9.00
   1   3  -8  307.27    8.60
  -1  -3   8  303.27    8.50
  -1  -3   8  278.37    9.10
  -1  -3   8  301.37    8.40
   1  -3  -8  286.47    9.50
   1  -3  -8  297.37    8.80
  -1  -3   8  287.77    9.00
   1  -3  -8  296.27    7.10
  -1   3   7    0.00    0.40
   1   3  -7   -0.40    1.00
   1   3  -7   -0.30    0.70
  -1   3   7   -1.30    0.80
  -1   3   7   -0.10    1.30
   1   3  -7   -1.00    1.00
  -1   3   7   -1.90    0.80
   1   3  -7    0.40    0.90
  -1   3   7   -0.10    1.20
   1  -3  -7   -0.30    1.10
   1  -3  -7   -0.20    0.40
   1  -3  -7   -0.90    1.10
  -1  -3   7   -0.80    0.90
  -1  -3   7   -1.00    0.80
  -1  -3   7   -0.70    1.30
   1   3  -6  159.18    5.70
  -1   3   6  165.78    5.70
  -1   3   6  167.98    5.90
  -1   3   6  163.18    5.30
   1   3  -6  161.98    5.00
  -1   3   6  165.28    4.50
   1   3  -6  177.08    5.50
  -1   3   6  162.08    5.60
   1   3  -6  168.58    5.30
   1  -3  -6  159.68    5.90
   1  -3  -6  165.38    4.50
  -1  -3   6  164.28    5.00
  -1  -3   6  160.18    5.20
   1  -3  -6  162.48    5.30
  -1  -3   6  171.38    5.70
   1   3  -5   26.10    1.80
  -1   3   5   27.40    2.30
   1   3  -5   19.90    2.30
   1   3  -5   28.60    1.60
   1   3  -5   28.80    1.80
  -1   3   5   26.30    1.70
  -1   3   5   26.70    1.30
  -1  -3   5   27.40    2.10
  -1  -3   5   29.70    1.90
  -1  -3   5   29.00    1.60
   1  -3  -5   23.40    2.40
   1  -3  -5   27.40    1.30
  -1  -3   5   27.40    1.90
   1  -3  -5   29.40    1.80
   1   3  -4  101.19    3.50
  -1   3   4  105.49    4.00
   1   3  -4   95.29    3.80
   1   3  -4   99.79    3.40
  -1   3   4   96.79    3.20
  -1   3   4   85.59    3.20
  -1   3   4   98.99    3.70
   1   3  -4   94.79    3.20
  -1  -3   4   93.79    3.50
  -1  -3   4   97.59    3.40
  -1  -3   4   98.89    3.20
   1  -3  -4  101.69    3.30
   1  -3  -4   98.49    3.10
   1  -3  -4  101.29    3.90
  -1  -3   4   97.19    3.70
  -1   3   3   66.59    2.30
  -1   3   3   71.99    3.00
   1   3  -3   67.19    2.40
   1   3  -3   64.79    2.40
  -1   3   3   69.99    2.40
   1   3  -3   69.89    2.80
   1   3  -3   67.19    2.70
  -1   3   3   65.49    2.80
   1  -3  -3   68.59    2.90
   1  -3  -3   68.89    2.40
  -1  -3   3   65.29    2.70
  -1  -3   3   69.99    2.80
   1  -3  -3   72.29    2.30
  -1  -3   3   66.09    2.40
   1  -3  -3   68.69    2.90
   1   3  -2  264.07    6.80
  -1   3   2  274.37    7.50
  -1   3   2  267.77    7.10
  -1   3   2  256.67    6.60
   1   3  -2  272.87    7.30
   1   3  -2  272.87    7.50
  -1   3   2  260.97    7.40
   1   3  -2  254.67    7.00
  -1  -3   2  236.08    7.40
  -1  -3   2  260.67    6.80
   1  -3  -2  263.97    6.60
   1  -3  -2  261.27    7.10
   1  -3  -2  275.57    7.40
  -1  -3   2  262.47    7.30
   1  -3  -2  257.77    7.50
   1   3  -1    6.20    1.20
   1   3  -1    6.10    1.00
  -1   3   1    6.50    1.20
   1   3  -1    6.90    0.90
  -1   3   1    6.40    0.30
  -1   3   1    5.60    1.10
   1   3  -1    6.70    0.60
  -1   3   1    7.60    1.00
   1  -3  -1    3.70    1.00
  -1  -3   1    6.20    1.00
  -1  -3   1    5.10    0.90
   1  -3  -1    6.10    1.10
  -1  -3   1    6.80    0.60
   1  -3  -1    5.50    0.90
  -1   3   0   23.90    1.50
  -1   3   0   22.50    1.50
   1   3   0   23.90    1.60
   1   3   0   21.20    0.90
   1   3   0   21.10    1.40
   1   3   0   23.60    1.40
  -1   3   0   23.10    1.50
   1  -3   0   22.50    1.50
   1  -3   0   20.40    1.50
  -1  -3   0   22.90    0.90
  -1  -3   0   22.90    1.40
  -1  -3   0   22.20    1.40
  -1  -3   0   21.30    1.60
   1  -3   0   23.70    1.50
  -1   3  -1   -1.20    0.60
  -1   3  -1   -1.30    0.70
   1   3   1   -1.70    0.30
  -1   3  -1   -0.80    0.30
  -1   3  -1   -1.80    0.60
   1   3   1   -1.90    0.60
   1   3   1   -2.00    0.70
   1   3   1   -1.30    0.40
  -1   3  -1   -1.30    0.70
   1   3   1   -0.50    0.60
   1  -3   1   -1.40    0.60
   1  -3   1   -1.20    0.30
   1  -3   1   -2.00    0.60
  -1  -3  -1   -1.70    0.50
  -1  -3  -1   -1.30    0.60
  -1  -3  -1   -1.50    0.70
  -1   3  -2    3.50    0.70
  -1   3  -2    4.00    0.90
   1   3   2    4.60    0.70
   1   3   2    4.90    0.80
  -1   3  -2    3.20    0.90
   1   3   2    3.90    1.00
  -1   3  -2    3.80    0.80
   1   3   2    3.10    0.90
  -1  -3  -2    3.80    0.80
   1  -3   2    4.80    0.90
  -1  -3  -2    7.50    1.20
   1  -3   2    3.60    0.80
   1  -3   2    3.40    0.60
  -1   3  -3   -0.60    0.70
  -1   3  -3    0.10    0.80
   1   3   3    0.10    0.50
  -1   3  -3    0.20    0.60
   1   3   3   -1.00    0.50
   1   3   3   -1.70    0.70
   1   3   3   -0.30    0.90
  -1   3  -3   -0.10    0.80
   1  -3   3   -1.80    0.50
   1  -3   3   -0.70    0.70
   1  -3   3    0.50    0.70
  -1  -3  -3    0.90    0.60
  -1  -3  -3    0.20    0.80
  -1  -3  -3   -0.80    0.50
   1  -3   3   -0.80    0.70
   1   3   4  306.87    8.20
   1   3   4  307.97    8.80
  -1   3  -4  296.37    8.20
   1   3   4  306.17    8.70
  -1   3  -4  294.77    8.50
   1   3   4  298.27    7.60
  -1   3  -4  315.37    8.40
   1   3   4  303.97    8.60
  -1   3  -4  300.27    8.10
  -1  -3  -4  297.97    7.60
   1  -3   4  301.77    8.40
  -1  -3  -4  284.87    8.70
   1  -3   4  295.57    8.20
   1  -3   4  311.17    8.30
  -1  -3  -4  307.17    8.10
   1  -3   4  298.77    8.30
  -1   3  -5   27.60    2.00
   1   3   5   29.00    1.20
  -1   3  -5   29.40    1.90
   1   3   5   28.30    2.40
   1   3   5   27.70    2.20
  -1   3  -5   27.30    1.80
  -1   3  -5   25.20    2.10
   1   3   5   28.90    1.90
   1  -3   5   27.80    1.90
   1  -3   5   30.70    1.90
   1  -3   5   27.70    2.00
  -1  -3  -5   26.80    1.90
  -1  -3  -5   27.60    1.20
  -1  -3  -5   25.10    2.10
   1  -3   5   27.80    1.80
  -1   3  -6  481.65   13.00
  -1   3  -6  513.65   13.10
   1   3   6  481.75   13.70
   1   3   6  490.55   11.90
  -1   3  -6  507.75   13.50
   1   3   6  498.65   13.60
   1   3   6  456.25   13.70
  -1   3  -6  494.15   13.20
   1  -3   6  498.25   13.40
  -1  -3  -6  499.45   13.80
  -1  -3  -6  487.25   11.80
   1  -3   6  499.15   13.00
   1  -3   6  511.95   13.10
  -1  -3  -6  515.65   13.20
   1  -3   6  479.95   13.20
  -1   3  -7    9.30    1.60
   1   3   7   14.00    2.10
  -1   3  -7   13.40    1.60
   1   3   7    9.10    1.50
  -1   3  -7   11.70    1.80
   1   3   7   11.00    1.90
   1  -3   7   16.60    2.10
  -1  -3  -7   10.20    1.60
   1  -3   7   12.70    1.60
   1  -3   7    9.40    1.60
  -1  -3  -7    8.30    1.70
  -1   3  -8  468.25   12.40
   1   3   8  462.25   13.00
  -1   3  -8  464.85   12.70
  -1   3  -8  458.55   13.10
  -1   3  -8  468.95   13.30
  -1  -3  -8  457.35   12.90
   1  -3   8  463.45   12.60
  -1  -3  -8  439.96   13.40
   1  -3   8  453.65   13.10
   1  -3   8  473.75   13.20
   1  -3   8  466.45   12.40
  -1   3  -9    0.70    1.40
  -1   3  -9    4.30    1.40
   1   3   9    1.20    1.40
  -1   3  -9    4.10    1.50
  -1  -3  -9    2.10    1.60
   1  -3   9    1.20    1.30
   1  -3   9    2.70    1.60
   1  -3   9    3.40    1.20
  -1   3 -10  373.56   11.70
  -1   3 -10  366.86   11.00
  -1   3 -10  370.46   10.50
   1   3  10  373.66   11.30
  -1  -3 -10  359.36   11.80
   1  -3  10  347.57   10.70
   1  -3  10  376.56   11.50
   1  -3  10  371.66   10.30
  -1   3 -11    8.50    1.90
  -1   3 -11    9.10    2.10
   1   3  11    9.10    2.10
  -1   3 -11   10.00    2.40
  -1  -3 -11   10.00    2.50
   1  -3  11   11.70    1.70
   1  -3  11    7.40    2.20
  -1   3 -12  279.27    8.70
  -1   3 -12  287.27    9.50
   1   3  12  269.87    9.90
  -1   3 -12  273.57   10.30
  -1  -3 -12  285.77   10.50
   1  -3  12  286.57   10.10
   1  -3  12  283.97    8.50
  -1   3 -13   10.70    2.50
  -1   3 -13   14.10    3.00
   1   3  13    7.60    2.70
   1  -3  13   12.60    2.80
   1  -3  13   11.80    2.00
  -1  -3 -13   12.30    3.00
  -1   3 -14  278.17   10.80
   1   3  14  272.37   10.40
  -1   3 -14  270.87    9.80
   1  -3  14  263.17    8.30
   1  -3  14  273.67   10.60
  -1  -3 -14  262.17   10.80
   1   3  15    1.20    2.60
  -1   3 -15    2.20    2.80
  -1   3 -15    7.00    3.20
   1   3  15    6.20    2.90
  -1  -3 -15    5.20    3.30
   1  -3  15    0.60    1.80
   1  -3  15    0.20    2.70
  -1   3 -16  241.98   10.00
   1   3  16  259.67   10.80
   1   3  16  251.07   10.70
  -1   3 -16  244.88   11.00
  -1  -3 -16  251.27   11.60
   1  -3  16  256.07   10.80
  -1   3 -17   19.20    4.80
  -1   3 -17   15.30    4.40
   1   3  17   21.10    4.20
   1   3  17   17.30    4.20
   1  -3  17   20.10    4.70
  -1  -3 -17   22.60    5.00
   1   3  18  178.38   10.00
   1   3  18  198.48   10.10
  -1   3 -18  184.58   11.10
   1  -3  18  173.18   10.00
  -1  -3 -18  181.88   11.10
  -1   4  18    1.60    3.70
   1   4 -18    6.50    4.50
  -1   4  18   -4.10    4.00
   1  -4 -18   13.10    5.00
  -1  -4  18    0.50    4.10
  -1   4  17   -0.40    3.30
   1   4 -17   -1.50    3.60
  -1   4  17   -0.60    3.50
  -1  -4  17    0.10    3.40
   1  -4 -17    0.90    4.10
   1   4 -16    0.90    2.90
  -1   4  16    1.20    3.00
   1   4 -16    7.40    3.50
  -1   4  16    3.70    3.20
  -1  -4  16    3.10    2.30
  -1  -4  16   -1.30    2.90
   1  -4 -16    0.00    3.30
   1   4 -15    3.60    2.50
  -1   4  15   -1.30    2.50
  -1   4  15    4.60    2.70
  -1  -4  15   -1.60    2.50
  -1  -4  15    0.80    2.10
   1  -4 -15    3.40    3.10
  -1   4  14    3.30    2.60
   1   4 -14    0.10    2.10
  -1   4  14   -1.90    2.40
   1   4 -14   -1.60    2.60
  -1  -4  14    1.00    2.40
  -1  -4  14   -2.30    1.80
   1  -4 -14    1.10    2.90
   1   4 -13   25.70    3.20
  -1   4  13   19.20    3.00
   1   4 -13   19.60    3.30
  -1   4  13   13.40    2.80
  -1  -4  13   20.30    2.50
  -1  -4  13   17.40    3.00
   1  -4 -13   20.20    3.50
  -1   4  12   24.80    3.20
   1   4 -12   25.20    3.50
  -1   4  12   20.60    3.00
   1   4 -12   18.60    2.40
  -1  -4  12   26.40    2.80
   1  -4 -12   23.90    3.30
  -1  -4  12   22.70    3.00
  -1   4  11   32.60    3.30
   1   4 -11   37.00    3.60
   1   4 -11   41.10    3.00
  -1   4  11   38.00    3.50
  -1  -4  11   39.40    3.50
   1  -4 -11   33.00    3.60
  -1  -4  11   37.90    2.90
  -1  -4  11   35.90    3.30
  -1   4  10   -1.00    1.40
  -1   4  10    3.40    1.50
   1   4 -10    1.30    2.00
   1   4 -10    2.90    1.40
   1   4 -10    1.00    1.50
   1  -4 -10   -0.10    1.60
  -1  -4  10    1.30    1.50
  -1  -4  10   -1.10    1.30
  -1  -4  10   -1.60    1.40
   1   4  -9    1.40    1.50
  -1   4   9    1.50    1.40
  -1   4   9    2.20    1.50
   1   4  -9    3.60    1.70
   1   4  -9    4.50    1.40
   1  -4  -9    3.00    0.40
   1  -4  -9    3.10    1.60
  -1  -4   9    0.70    1.50
  -1  -4   9    0.00    1.30
  -1  -4   9    2.60    1.40
   1   4  -8   65.69    3.00
   1   4  -8   63.49    3.60
   1   4  -8   57.89    3.50
  -1   4   8   64.09    3.60
  -1   4   8   63.29    3.30
  -1   4   8   63.29    2.20
   1   4  -8   61.89    3.40
  -1  -4   8   65.79    3.10
   1  -4  -8   64.89    2.10
  -1  -4   8   61.49    3.30
  -1  -4   8   62.89    3.50
   1  -4  -8   66.59    3.50
   1  -4  -8   62.79    3.90
  -1   4   7   75.59    4.00
   1   4  -7   76.89    3.20
   1   4  -7   72.39    3.80
  -1   4   7   72.99    3.70
  -1   4   7   70.89    3.40
   1   4  -7   72.19    3.60
   1   4  -7   76.29    3.60
   1  -4  -7   81.19    3.50
   1  -4  -7   81.59    4.10
  -1  -4   7   77.59    3.60
  -1  -4   7   74.99    3.20
  -1  -4   7   71.29    3.50
  -1  -4   7   73.59    3.80
   1  -4  -7   72.09    2.50
  -1   4   6   53.49    2.10
  -1   4   6   50.19    2.50
  -1   4   6   46.60    2.90
   1   4  -6   55.29    3.10
   1   4  -6   51.49    2.80
   1   4  -6   53.39    2.40
  -1   4   6   48.90    3.30
   1   4  -6   47.30    2.80
   1  -4  -6   44.30    2.60
  -1  -4   6   48.20    2.70
  -1  -4   6   42.10    3.10
  -1  -4   6   52.69    3.10
   1  -4  -6   50.99    3.10
   1  -4  -6   53.09    2.10
  -1  -4   6   50.89    2.50
  -1   4   5    8.90    1.60
   1   4  -5    5.30    1.00
   1   4  -5    4.10    1.20
  -1   4   5    4.40    1.00
  -1   4   5    2.40    1.30
  -1   4   5    3.30    0.80
   1   4  -5    3.50    1.10
   1   4  -5    2.60    1.20
  -1  -4   5    7.30    1.40
   1  -4  -5    3.90    0.80
   1  -4  -5    6.80    1.40
   1  -4  -5    3.30    1.00
  -1  -4   5    1.80    1.00
  -1  -4   5    4.20    1.00
  -1  -4   5    5.50    1.00
  -1   4   4   12.70    1.20
  -1   4   4   16.00    1.90
   1   4  -4   15.00    1.70
   1   4  -4   14.20    1.30
   1   4  -4   15.90    1.40
   1   4  -4   16.20    1.70
  -1   4   4   16.40    1.80
  -1   4   4   17.20    1.40
  -1  -4   4   18.50    1.80
  -1  -4   4   16.60    1.50
  -1  -4   4   11.40    1.30
   1  -4  -4   14.40    1.20
   1  -4  -4   15.40    1.80
  -1  -4   4   14.20    1.60
   1  -4  -4   14.30    1.30
   1   4  -3   41.90    2.30
   1   4  -3   44.50    1.90
   1   4  -3   46.60    2.50
  -1   4   3   42.70    2.50
  -1   4   3   45.20    2.60
   1   4  -3   44.20    2.10
  -1   4   3   44.90    1.70
  -1   4   3   46.50    2.10
   1  -4  -3   43.60    2.60
  -1  -4   3   40.50    2.30
   1  -4  -3   45.10    1.70
   1  -4  -3   45.00    2.00
  -1  -4   3   46.50    2.10
   1  -4  -3   42.00    2.50
  -1  -4   3   43.40    1.90
   1   4  -2   91.89    3.20
  -1   4   2   93.19    3.60
   1   4  -2   93.49    2.80
  -1   4   2  100.09    3.40
  -1   4   2   97.59    3.70
   1   4  -2   96.39    3.50
  -1   4   2   88.29    2.50
   1   4  -2   97.89    3.70
  -1  -4   2   90.59    3.50
   1  -4  -2   90.99    3.30
  -1  -4   2   89.89    3.20
   1  -4  -2   94.89    3.60
   1  -4  -2   93.39    2.50
  -1  -4   2   92.19    2.80
   1  -4  -2   90.39    3.70
  -1   4   1   71.69    3.00
   1   4  -1   77.39    3.20
   1   4  -1   72.59    2.20
   1   4  -1   77.09    3.00
   1   4  -1   74.99    2.90
  -1   4   1   73.59    2.90
  -1   4   1   76.79    3.10
  -1  -4   1   72.99    3.00
  -1  -4   1   76.39    2.90
   1  -4  -1   78.39    3.10
   1  -4  -1   77.19    3.20
   1  -4  -1   73.79    2.90
  -1  -4   1   72.59    2.20
   1   4   0   28.40    1.70
   1   4   0   26.60    1.00
   1   4   0   27.20    1.70
   1   4   0   26.70    1.90
  -1   4   0   28.90    1.80
  -1   4   0   25.90    1.70
  -1   4   0   28.00    1.90
   1  -4   0   26.80    1.70
   1  -4   0   27.30    1.80
  -1  -4   0   27.50    1.70
  -1  -4   0   27.20    1.70
   1   4   1   79.79    2.30
  -1   4  -1   76.39    3.20
   1   4   1   75.29    2.90
   1   4   1   82.09    3.20
  -1   4  -1   79.29    3.10
  -1   4  -1   79.19    2.20
  -1   4  -1   82.29    3.20
   1   4   1   81.79    3.40
   1   4   1   79.09    2.30
   1  -4   1   83.49    3.20
   1  -4   1   77.99    2.20
  -1  -4  -1   76.89    2.90
  -1  -4  -1   84.29    3.20
  -1  -4  -1   75.89    3.30
   1  -4   1   81.69    3.20
  -1   4  -2   78.69    3.20
  -1   4  -2   81.39    3.30
   1   4   2   79.99    2.50
  -1   4  -2   76.29    3.00
   1   4   2   81.59    3.50
   1   4   2   81.99    2.90
  -1   4  -2   83.19    2.50
   1   4   2   76.39    3.20
   1   4   2   80.59    2.50
   1  -4   2   81.29    2.50
  -1  -4  -2   84.49    3.50
   1  -4   2   84.79    3.10
  -1  -4  -2   82.49    2.90
   1  -4   2   76.19    3.20
   1   4   3  123.19    3.70
   1   4   3  125.29    3.90
  -1   4  -3  127.09    4.40
  -1   4  -3  122.29    3.70
   1   4   3  127.19    4.70
  -1   4  -3  125.89    4.20
  -1   4  -3  118.09    4.30
  -1  -4  -3  115.29    3.80
  -1  -4  -3  109.99    5.00
   1  -4   3  124.09    3.80
   1  -4   3  125.39    4.20
   1   4   4  257.17    7.80
   1   4   4  261.57    7.90
   1   4   4  255.27    7.00
   1   4   4  259.37    6.90
  -1   4  -4  254.57    7.10
  -1   4  -4  257.37    7.50
   1   4   4  249.88    7.90
   1  -4   4  252.77    7.30
   1  -4   4  250.67    7.50
   1  -4   4  250.87    7.10
   1  -4   4  249.88    7.50
  -1  -4  -4  243.08    6.80
  -1  -4  -4  256.07    8.00
  -1  -4  -4  253.97    7.00
  -1   4  -5   35.10    2.20
  -1   4  -5   38.50    2.30
  -1   4  -5   34.20    2.40
   1   4   5   40.60    2.80
   1   4   5   33.70    2.00
   1   4   5   43.10    2.90
   1   4   5   36.10    1.70
  -1   4  -5   32.90    2.30
   1   4   5   35.50    2.50
   1  -4   5   35.10    2.20
   1  -4   5   36.20    2.50
  -1  -4  -5   38.90    2.20
   1  -4   5   38.40    2.50
   1  -4   5   37.90    2.20
  -1  -4  -5   37.30    1.70
  -1  -4  -5   39.70    2.70
   1   4   6   52.39    3.00
   1   4   6   49.20    3.40
   1   4   6   47.80    1.90
   1   4   6   45.40    3.10
   1   4   6   43.30    2.90
  -1   4  -6   43.70    2.80
  -1   4  -6   46.30    2.60
  -1   4  -6   47.30    2.70
   1  -4   6   44.60    2.80
   1  -4   6   49.10    2.70
  -1  -4  -6   45.90    1.80
   1  -4   6   49.40    2.70
  -1  -4  -6   51.09    2.70
   1  -4   6   47.30    2.90
  -1  -4  -6   43.80    3.00
  -1   4  -7   39.10    2.90
  -1   4  -7   38.90    2.50
   1   4   7   38.70    2.80
  -1   4  -7   38.00    2.70
  -1   4  -7   38.90    2.80
   1   4   7   40.20    1.60
   1   4   7   37.20    2.60
   1  -4   7   37.50    2.70
   1  -4   7   35.50    2.80
  -1  -4  -7   37.90    3.00
  -1  -4  -7   39.90    1.50
   1  -4   7   42.30    2.60
   1  -4   7   36.30    2.70
  -1  -4  -7   41.80    2.70
  -1   4  -8   74.29    3.80
  -1   4  -8   76.29    4.00
   1   4   8   78.59    3.80
  -1   4  -8   79.69    3.70
   1   4   8   82.49    4.20
   1  -4   8   70.99    3.70
  -1  -4  -8   70.79    3.90
   1  -4   8   76.19    3.60
  -1  -4  -8   74.49    4.30
   1  -4   8   75.99    3.80
  -1   4  -9    6.00    1.50
  -1   4  -9    3.90    1.70
  -1   4  -9    2.60    1.50
   1   4   9    4.70    1.70
   1   4   9    1.00    1.30
   1  -4   9    3.10    1.80
   1  -4   9    3.20    1.30
  -1  -4  -9    3.50    1.70
   1  -4   9    5.00    1.60
  -1   4 -10    0.80    1.50
   1   4  10   -1.30    1.40
  -1   4 -10   -2.40    1.40
  -1   4 -10   -0.80    1.80
   1   4  10    1.70    1.60
   1  -4  10   -0.60    1.30
  -1  -4 -10    1.20    1.70
   1  -4  10   -2.40    1.40
   1   4  11    7.10    2.30
   1   4  11    4.30    2.00
  -1   4 -11    5.10    2.00
  -1   4 -11    6.10    1.90
   1  -4  11    5.50    2.10
   1  -4  11    7.30    1.70
  -1  -4 -11    8.10    2.20
   1   4  12   23.90    3.10
   1   4  12   19.60    3.00
  -1   4 -12   22.10    2.90
  -1   4 -12   17.30    3.20
   1  -4  12   24.50    2.90
   1  -4  12   21.40    3.00
  -1  -4 -12   19.40    3.30
   1   4  13   -0.20    2.20
   1   4  13    4.10    2.40
  -1   4 -13    3.20    2.00
  -1   4 -13    1.80    2.40
   1  -4  13   -0.70    2.20
   1  -4  13    3.10    1.80
  -1  -4 -13    1.20    2.40
  -1   4 -14    8.70    2.60
   1   4  14    2.90    2.50
  -1   4 -14    3.40    2.70
   1   4  14    4.10    2.60
   1  -4  14    0.90    2.60
   1  -4  14    3.70    2.00
  -1  -4 -14    4.50    2.80
   1   4  15    1.60    2.70
  -1   4 -15   -3.50    2.70
   1   4  15   -1.90    2.60
  -1   4 -15    1.90    3.60
   1  -4  15   -6.70    2.70
  -1  -4 -15    3.70    3.40
   1  -4  15   -1.70    2.00
   1   4  16   15.60    3.80
   1   4  16   21.70    4.10
  -1   4 -16   18.80    4.30
  -1   4 -16   23.50    4.00
   1  -4  16   19.30    4.30
  -1  -4 -16   17.80    4.20
  -1   4 -17    2.00    3.90
   1   4  17   -3.10    3.70
   1   4  17    5.50    3.90
  -1   4 -17    7.60    4.10
  -1  -4 -17    6.20    4.10
   1  -4  17    5.50    3.70
  -1   4 -18   11.10    5.00
   1   4  18    0.00    4.00
  -1   4 -18    7.60    5.90
   1   4  18   15.80    4.60
   1  -4  18    3.40    4.40
  -1  -4 -18    1.70    4.80
   1   5 -18    5.30    4.80
  -1   5  18   12.90    4.40
  -1   5  18   14.20    4.80
   1  -5 -18   18.50    5.30
  -1  -5  18    8.90    4.90
  -1   5  17  135.59    8.70
  -1   5  17  153.78    9.10
   1   5 -17  162.08    9.40
  -1  -5  17  146.49    9.20
   1  -5 -17  146.89    9.50
  -1   5  16    9.50    3.90
   1   5 -16    9.90    3.80
  -1   5  16    6.50    3.40
   1   5 -16   14.50    3.50
  -1  -5  16   16.40    3.70
  -1  -5  16    9.70    3.00
   1  -5 -16    8.80    4.10
   1   5 -15  165.08    9.10
   1   5 -15  159.58    7.30
  -1   5  15  167.48   11.20
  -1   5  15  162.68    8.10
   1  -5 -15  155.98    8.80
  -1  -5  15  167.18    7.00
  -1  -5  15  168.68    8.10
   1   5 -14    4.40    2.40
  -1   5  14    7.50    2.80
  -1   5  14   10.20    2.80
   1   5 -14    5.20    2.90
   1  -5 -14   10.00    4.20
  -1  -5  14    8.50    2.40
  -1  -5  14   11.50    2.70
   1   5 -13  251.67   10.10
  -1   5  13  246.08    9.30
   1   5 -13  238.38    8.50
  -1   5  13  253.57    9.60
   1  -5 -13  245.98   10.30
  -1  -5  13  248.78    9.50
  -1  -5  13  243.38    8.50
   1   5 -12   38.30    3.40
  -1   5  12   33.40    3.70
   1   5 -12   35.10    4.10
  -1   5  12   33.70    4.10
  -1  -5  12   36.10    3.40
   1  -5 -12   28.90    3.80
  -1  -5  12   31.40    3.60
  -1   5  11  258.37    8.90
   1   5 -11  258.17    9.70
   1   5 -11  261.47    8.40
  -1   5  11  265.07    9.60
   1  -5 -11  260.07   10.00
  -1  -5  11  261.67    8.70
  -1  -5  11  256.17    8.50
  -1  -5  11  270.87    9.30
  -1   5  10    0.80    1.60
  -1   5  10    0.70    1.40
   1   5 -10    0.20    1.40
   1   5 -10    1.90    1.80
  -1  -5  10   -0.10    1.70
  -1  -5  10   -1.50    1.30
   1  -5 -10   -0.40    1.80
  -1  -5  10   -1.30    1.40
  -1   5   9  149.49    6.30
   1   5  -9  153.98    6.60
  -1   5   9  148.89    5.60
   1   5  -9  153.78    5.40
  -1  -5   9  146.49    5.40
  -1  -5   9  153.88    5.80
   1  -5  -9  150.78    4.30
   1  -5  -9  140.19    6.50
  -1  -5   9  156.08    6.00
  -1   5   8    4.50    1.60
   1   5  -8    1.40    1.70
   1   5  -8    5.50    1.40
  -1   5   8    5.20    1.00
  -1   5   8    5.70    1.50
   1   5  -8    4.50    1.80
   1  -5  -8    4.60    0.90
  -1  -5   8    3.60    1.40
  -1  -5   8    5.10    1.50
  -1  -5   8    4.80    1.40
   1  -5  -8    3.50    1.50
   1  -5  -8    5.90    1.80
   1   5  -7  188.88    7.00
  -1   5   7  191.78    7.00
  -1   5   7  205.48    5.70
   1   5  -7  181.78    6.00
  -1   5   7  192.78    6.20
   1   5  -7  190.18    6.40
   1  -5  -7  190.58    7.30
   1  -5  -7  198.58    5.60
   1  -5  -7  197.38    6.20
  -1  -5   7  193.28    6.60
  -1  -5   7  191.38    6.10
  -1  -5   7  188.88    6.30
   1   5  -6   14.60    1.70
  -1   5   6   14.50    2.00
   1   5  -6    9.30    1.80
   1   5  -6   13.00    1.70
  -1   5   6   13.90    1.70
   1   5  -6   11.70    1.80
  -1   5   6   15.40    1.60
  -1  -5   6   15.70    1.70
   1  -5  -6   10.70    1.90
   1  -5  -6   16.30    1.50
  -1  -5   6   13.00    1.80
  -1  -5   6   14.70    1.60
   1  -5  -6   18.50    1.80
  -1  -5   6   16.30    2.50
  -1   5   5  112.79    3.80
   1   5  -5  110.89    4.60
   1   5  -5  104.89    4.40
   1   5  -5  112.29    4.00
  -1   5   5  116.79    3.90
  -1   5   5  110.49    4.60
   1   5  -5  114.09    4.00
  -1   5   5  114.89    4.90
   1  -5  -5  117.59    3.80
  -1  -5   5  106.29    4.50
  -1  -5   5  111.89    4.00
  -1  -5   5  107.89    4.40
  -1  -5   5  116.89    4.10
   1  -5  -5  107.49    3.80
   1  -5  -5  109.69    4.80
  -1   5   4    0.30    1.30
   1   5  -4    2.80    1.10
   1   5  -4    1.20    0.80
  -1   5   4    0.60    0.60
   1   5  -4    0.50    0.70
  -1   5   4    0.80    0.90
   1   5  -4    1.20    1.20
  -1   5   4   -0.40    1.10
  -1  -5   4    2.10    1.00
  -1  -5   4    1.80    0.80
  -1  -5   4    0.50    0.90
   1  -5  -4    0.60    0.80
   1  -5  -4   -0.20    1.00
   1  -5  -4    3.00    1.30
   1  -5  -4    1.60    0.60
  -1   5   3   21.80    1.90
  -1   5   3   18.90    2.20
  -1   5   3   22.40    1.10
   1   5  -3   21.40    1.70
  -1   5   3   21.60    2.00
   1   5  -3   20.70    1.30
   1   5  -3   19.30    2.00
   1   5  -3   18.70    1.90
  -1  -5   3   22.00    1.40
   1  -5  -3   16.70    2.10
   1  -5  -3   19.80    1.70
   1  -5  -3   25.80    2.30
   1  -5  -3   20.90    1.10
  -1  -5   3   24.30    1.90
  -1  -5   3   22.60    1.90
   1   5  -2   30.20    1.40
   1   5  -2   28.40    2.20
   1   5  -2   28.40    1.90
  -1   5   2   29.90    1.00
  -1   5   2   31.00    2.20
  -1   5   2   33.90    2.50
   1   5  -2   31.50    2.20
  -1   5   2   33.80    2.00
   1   5  -2   30.60    2.40
  -1   5   2   31.20    1.00
  -1  -5   2   27.70    2.10
   1  -5  -2   34.30    2.40
  -1  -5   2   32.50    1.40
   1  -5  -2   26.20    2.00
  -1  -5   2   32.80    2.00
   1  -5  -2   31.10    2.30
  -1   5   1    3.40    1.30
  -1   5   1    4.90    1.10
  -1   5   1    4.20    1.20
   1   5  -1    3.10    0.50
   1   5  -1    3.80    1.20
   1   5  -1    4.60    1.10
   1   5  -1    4.60    1.10
  -1  -5   1    2.60    0.40
  -1  -5   1    2.60    1.00
  -1  -5   1    0.90    0.90
   1  -5  -1    3.90    1.20
   1  -5  -1    3.90    1.20
   1   5   0    4.90    0.50
  -1   5   0    5.70    1.30
   1   5   0    2.60    1.20
  -1   5   0    2.70    1.10
   1   5   0    2.80    1.10
   1   5   0    5.20    1.20
   1  -5   0    5.80    1.30
  -1  -5   0    2.60    1.20
   1  -5   0    5.30    1.20
  -1  -5   0    6.70    1.30
   1   5   1   79.39    3.60
   1   5   1   78.89    2.20
   1   5   1   79.49    3.20
  -1   5  -1   79.49    3.40
  -1   5  -1   76.89    3.60
   1   5   1   76.99    2.20
  -1   5  -1   71.99    3.30
   1  -5   1   76.69    3.30
  -1  -5  -1   72.29    3.50
  -1  -5  -1   82.29    3.50
  -1  -5  -1   71.99    3.20
   1  -5   1   73.99    3.30
   1  -5   1   76.99    2.10
  -1   5  -2  113.59    4.20
   1   5   2  117.09    3.30
  -1   5  -2  115.09    3.30
  -1   5  -2  114.09    4.40
   1   5   2  109.69    4.60
   1   5   2  114.99    4.00
   1   5   2  117.39    3.30
   1   5   2  110.59    4.30
  -1   5  -2  108.49    4.30
  -1   5  -2  115.29    4.40
   1  -5   2  118.39    4.40
   1  -5   2  114.69    3.30
  -1  -5  -2  111.79    4.60
   1  -5   2  122.19    4.30
  -1  -5  -2  112.09    4.00
  -1   5  -3  213.98    7.10
   1   5   3  245.78    6.80
   1   5   3  239.18    7.70
  -1   5  -3  241.88    6.30
  -1   5  -3  233.78    7.30
   1   5   3  239.48    7.50
   1   5   3  219.08    6.70
  -1   5  -3  231.18    7.30
   1  -5   3  238.78    7.30
  -1  -5  -3  235.68    7.70
   1  -5   3  241.08    7.10
  -1  -5  -3  229.18    6.70
   1  -5   3  227.88    6.30
  -1   5  -4   16.30    1.50
   1   5   4   15.70    1.40
   1   5   4   14.10    1.80
  -1   5  -4   14.70    1.90
  -1   5  -4   14.80    1.80
   1   5   4   15.90    2.20
   1   5   4   14.70    1.50
  -1  -5  -4   17.60    2.10
  -1  -5  -4   13.10    1.40
   1  -5   4   14.90    1.80
   1  -5   4   14.40    1.80
   1  -5   4   12.50    1.40
   1   5   5  213.08    6.30
   1   5   5  224.18    6.20
  -1   5  -5  214.98    7.10
  -1   5  -5  212.48    6.40
   1   5   5  215.48    7.20
   1   5   5  203.88    7.30
  -1   5  -5  205.98    6.70
   1   5   5  215.48    7.60
  -1   5  -5  214.08    7.00
   1  -5   5  220.78    6.80
  -1  -5  -5  214.58    6.10
   1  -5   5  215.48    6.50
  -1  -5  -5  220.08    6.40
   1  -5   5  209.18    7.00
  -1  -5  -5  203.88    7.30
   1  -5   5  210.88    6.90
   1   5   6   33.10    2.70
  -1   5  -6   36.10    2.80
   1   5   6   43.60    2.10
  -1   5  -6   43.40    3.10
  -1   5  -6   40.50    2.60
   1   5   6   38.30    2.80
  -1   5  -6   41.10    2.60
  -1  -5  -6   33.30    2.90
   1  -5   6   40.30    3.10
   1  -5   6   38.70    2.70
  -1  -5  -6   36.60    2.50
  -1  -5  -6   41.10    2.00
   1  -5   6   43.50    2.60
   1  -5   6   38.30    2.40
  -1   5  -7  264.57    8.30
   1   5   7  275.57    7.30
   1   5   7  268.47    8.20
  -1   5  -7  260.57    8.80
   1   5   7  263.87    8.90
  -1   5  -7  269.77    8.30
   1  -5   7  267.37    8.30
  -1  -5  -7  280.07    8.20
   1  -5   7  265.07    8.40
  -1  -5  -7  271.37    7.20
  -1  -5  -7  269.17    9.20
   1  -5   7  281.27    8.30
  -1   5  -8   24.10    3.00
   1   5   8   23.70    2.60
   1   5   8   31.80    3.00
   1   5   8   32.30    1.50
  -1   5  -8   27.60    2.60
  -1  -5  -8   35.50    2.90
  -1  -5  -8   28.30    1.50
   1  -5   8   28.80    2.70
  -1  -5  -8   26.20    3.20
   1  -5   8   24.30    2.50
   1  -5   8   28.40    2.90
  -1   5  -9  227.78    8.60
  -1   5  -9  236.78    7.90
   1   5   9  251.87    8.00
   1   5   9  235.18    8.60
   1  -5   9  236.28    7.80
   1  -5   9  224.68    7.80
  -1  -5  -9  241.18    9.00
   1  -5   9  252.67    8.20
   1   5  10    7.10    2.20
  -1   5 -10    6.80    1.90
   1   5  10    7.70    1.90
  -1   5 -10    8.00    2.10
   1  -5  10    7.20    2.00
   1  -5  10    4.60    1.70
  -1  -5 -10    5.10    2.20
   1   5  11  370.96   12.20
  -1   5 -11  360.76   11.20
   1   5  11  359.76   11.60
  -1   5 -11  364.96   12.30
  -1  -5 -11  357.76   12.60
   1  -5  11  368.46   11.80
   1  -5  11  359.46   11.00
  -1   5 -12   16.90    3.10
   1   5  12   15.40    2.80
   1   5  12   18.00    3.20
  -1   5 -12   19.30    2.70
   1  -5  12   17.80    2.60
   1  -5  12   12.90    2.70
  -1  -5 -12   20.10    3.60
  -1   5 -13  289.67   11.00
   1   5  13  293.47   10.90
  -1   5 -13  290.17   10.00
   1   5  13  279.47   10.40
   1  -5  13  279.77   10.50
  -1  -5 -13  295.87   11.50
   1  -5  13  282.67    9.50
   1   5  14   41.30    6.80
  -1   5 -14   42.30    4.60
  -1   5 -14   35.20    4.50
   1   5  14   36.00    4.20
  -1  -5 -14   33.80    4.60
   1  -5  14   44.00    4.70
   1  -5  14   38.70    4.10
  -1   5 -15  208.48   10.00
   1   5  15  211.58    9.20
  -1   5 -15  195.98    8.70
   1   5  15  189.48    9.50
  -1  -5 -15  197.38   10.20
   1  -5  15  196.18    9.50
   1  -5  15  196.28    7.70
   1   5  16   26.40    4.50
  -1   5 -16   25.10    4.30
   1   5  16   28.50    4.80
  -1   5 -16   25.10    4.80
  -1  -5 -16   27.80    5.10
   1  -5  16   18.10    4.10
   1   5  17  127.09    8.10
  -1   5 -17  114.19    9.00
  -1   5 -17  121.19    8.20
   1   5  17  118.99    8.60
   1  -5  17  107.89    8.60
  -1  -5 -17  112.39    9.60
   1   6 -17   -2.50    4.10
  -1   6  17    2.00    4.20
  -1   6  17   -5.60    3.40
  -1  -6  17    5.00    4.10
   1  -6 -17    9.40    5.20
  -1   6  16    1.70    3.50
  -1   6  16   -2.60    3.40
   1   6 -16    3.40    4.00
  -1  -6  16   -4.80    3.10
   1  -6 -16   -3.50    3.80
  -1  -6  16    3.00    3.10
   1   6 -15   25.00    4.60
   1   6 -15   21.20    3.40
  -1   6  15   22.80    4.10
  -1  -6  15   22.50    4.10
  -1  -6  15   22.10    3.40
   1  -6 -15   23.10    4.50
  -1   6  14    3.80    2.70
  -1   6  14    2.00    2.70
   1   6 -14   -1.90    2.40
   1   6 -14    8.90    3.20
  -1  -6  14    4.30    2.70
  -1  -6  14    1.50    2.50
   1  -6 -14   -0.60    3.20
  -1   6  13   38.50    4.70
  -1   6  13   36.90    4.30
   1   6 -13   36.50    3.90
   1   6 -13   34.80    4.40
  -1  -6  13   34.80    4.00
  -1  -6  13   39.20    4.00
   1   6 -12    5.90    2.90
   1   6 -12    5.50    2.10
  -1   6  12    5.10    2.30
  -1   6  12    3.70    2.70
  -1  -6  12    6.30    2.30
   1  -6 -12    5.30    2.70
  -1  -6  12    6.30    2.30
   1   6 -11   43.20    3.50
  -1   6  11   46.40    4.20
  -1   6  11   37.80    3.60
   1   6 -11   37.80    4.30
  -1  -6  11   37.30    3.60
  -1  -6  11   38.00    3.40
   1  -6 -11   46.50    4.70
  -1   6  10   13.00    2.30
  -1   6  10   10.90    2.60
  -1   6  10   10.80    1.90
   1   6 -10   14.20    2.80
   1   6 -10   15.80    2.20
   1  -6 -10   14.90    2.90
   1  -6 -10   11.10    1.20
  -1  -6  10    8.70    2.10
  -1  -6  10   12.80    2.30
  -1  -6  10   13.30    2.30
  -1   6   9  111.69    3.90
  -1   6   9  103.69    5.50
   1   6  -9  113.49    4.70
  -1   6   9  114.99    4.80
   1   6  -9  116.79    5.90
  -1  -6   9  117.49    5.30
  -1  -6   9  116.89    5.10
  -1  -6   9  112.69    4.90
   1  -6  -9  106.99    5.80
   1  -6  -9  114.39    3.80
   1   6  -8   12.80    2.20
  -1   6   8    8.90    2.20
  -1   6   8    8.10    1.70
  -1   6   8    9.80    1.50
   1   6  -8   13.50    1.90
   1   6  -8    8.50    2.30
   1  -6  -8   13.70    2.50
  -1  -6   8    9.20    1.90
   1  -6  -8   11.50    2.00
  -1  -6   8    8.30    2.00
  -1  -6   8   13.10    1.90
   1  -6  -8    8.70    1.30
   1   6  -7   24.20    2.90
  -1   6   7   27.10    2.30
   1   6  -7   23.30    2.30
   1   6  -7   20.40    2.20
  -1   6   7   19.50    2.50
  -1   6   7   21.10    2.10
   1  -6  -7   21.80    2.00
   1  -6  -7   17.10    2.70
   1  -6  -7   26.70    2.40
  -1  -6   7   16.10    2.20
  -1  -6   7   18.70    2.20
  -1  -6   7   26.50    2.50
  -1   6   6   16.10    2.30
   1   6  -6   21.90    2.20
  -1   6   6   19.60    2.10
   1   6  -6   20.00    2.50
  -1   6   6   18.40    1.80
   1   6  -6   17.20    2.20
   1  -6  -6   18.70    2.00
  -1  -6   6   17.40    1.90
   1  -6  -6   17.80    2.50
  -1  -6   6   14.20    2.10
   1  -6  -6   14.90    1.90
  -1  -6   6   19.80    2.30
  -1   6   5  160.08    5.30
   1   6  -5  156.48    5.80
  -1   6   5  157.48    4.80
   1   6  -5  160.08    5.10
  -1   6   5  158.98    6.20
   1   6  -5  165.28    6.20
   1  -6  -5  149.59    6.20
   1  -6  -5  153.28    5.30
  -1  -6   5  149.09    5.80
   1  -6  -5  164.48    4.80
  -1  -6   5  154.88    5.00
  -1  -6   5  154.28    5.30
   1   6  -4   12.40    1.40
  -1   6   4   11.30    1.20
   1   6  -4   10.50    1.80
  -1   6   4   11.70    1.60
  -1   6   4   12.30    2.00
   1  -6  -4   17.10    2.30
   1  -6  -4   10.90    1.60
  -1  -6   4   10.20    1.20
  -1  -6   4   15.00    2.00
  -1  -6   4   16.60    2.10
  -1   6   3  135.89    5.30
   1   6  -3  131.29    5.20
  -1   6   3  137.79    3.60
   1   6  -3  139.69    4.10
   1   6  -3  125.59    5.30
  -1   6   3  140.79    4.90
  -1   6   3  137.69    3.60
   1   6  -3  140.39    5.30
   1   6  -3  125.69    5.40
  -1   6   3  128.39    5.40
   1  -6  -3  134.09    5.30
   1  -6  -3  126.89    5.40
  -1  -6   3  130.29    5.10
   1  -6  -3  138.39    4.90
  -1  -6   3  130.49    4.80
  -1  -6   3  137.59    4.00
   1   6  -2   21.70    2.20
  -1   6   2   25.20    2.10
  -1   6   2   24.00    2.80
   1   6  -2   17.60    1.20
   1   6  -2   26.10    2.60
   1   6  -2   20.80    2.30
  -1   6   2   20.10    2.20
   1   6  -2   20.70    2.10
   1  -6  -2   21.80    2.30
   1  -6  -2   20.90    2.40
  -1  -6   2   18.40    1.20
  -1  -6   2   20.70    2.10
  -1  -6   2   17.30    2.10
   1  -6  -2   23.50    2.00
   1   6  -1  222.38    7.50
   1   6  -1  217.38    7.00
  -1   6   1  219.08    7.00
   1   6  -1  220.18    7.00
   1   6  -1  223.28    5.50
  -1   6   1  220.18    7.40
  -1   6   1  221.38    7.20
  -1  -6   1  212.18    7.00
   1  -6  -1  215.08    6.90
   1  -6  -1  223.78    7.50
   1  -6  -1  217.38    7.20
  -1  -6   1  219.48    5.50
  -1  -6   1  223.28    7.00
   1   6   0   69.39    1.80
  -1   6   0   64.39    3.40
   1   6   0   78.09    3.80
   1   6   0   65.69    3.40
   1   6   0   66.69    1.80
  -1   6   0   75.39    3.70
   1   6   0   63.59    3.30
  -1   6   0   71.29    3.50
  -1  -6   0   67.49    3.50
  -1  -6   0   69.89    3.30
   1  -6   0   67.29    3.40
   1  -6   0   66.29    3.50
  -1   6  -1  148.79    5.60
   1   6   1  172.88    4.10
  -1   6  -1  160.78    6.00
  -1   6  -1  160.48    5.70
   1   6   1  156.28    6.00
   1   6   1  163.08    5.80
   1   6   1  168.78    5.70
   1   6   1  163.68    4.10
   1  -6   1  163.48    5.70
  -1  -6  -1  158.78    5.50
  -1  -6  -1  167.28    6.20
  -1  -6  -1  157.78    5.80
   1  -6   1  163.68    5.70
  -1   6  -2   25.70    2.70
   1   6   2   28.60    2.70
   1   6   2   24.10    1.20
  -1   6  -2   24.40    2.50
   1   6   2   25.20    2.20
  -1   6  -2   26.00    2.40
  -1   6  -2   27.70    2.40
   1   6   2   26.40    1.20
  -1   6  -2   21.90    1.20
   1   6   2   23.80    2.30
   1  -6   2   21.70    1.20
  -1  -6  -2   25.90    2.50
   1  -6   2   27.30    2.50
   1  -6   2   19.60    2.20
  -1  -6  -2   25.60    2.20
  -1   6  -3  131.59    3.90
   1   6   3  132.19    4.70
   1   6   3  134.09    3.90
  -1   6  -3  125.39    5.10
   1   6   3  130.39    5.20
  -1   6  -3  131.49    4.90
  -1   6  -3  135.89    5.50
   1  -6   3  129.69    4.90
   1  -6   3  129.09    5.10
   1  -6   3  129.69    3.90
  -1  -6  -3  131.89    4.70
  -1  -6  -3  129.29    5.50
   1   6   4   42.20    2.60
   1   6   4   32.60    3.00
   1   6   4   44.40    2.10
  -1   6  -4   45.50    2.30
  -1   6  -4   43.60    2.90
  -1   6  -4   46.70    2.90
   1  -6   4   43.20    2.90
   1  -6   4   44.70    2.80
  -1  -6  -4   42.00    2.50
   1  -6   4   41.30    2.10
  -1  -6  -4   49.80    3.30
  -1   6  -5  148.29    4.80
  -1   6  -5  141.09    5.30
   1   6   5  147.99    4.90
  -1   6  -5  145.89    5.70
   1   6   5  140.29    4.60
   1   6   5  147.99    5.80
  -1  -6  -5  137.19    5.90
  -1  -6  -5  137.19    4.80
   1  -6   5  138.19    5.50
   1  -6   5  138.99    4.70
   1  -6   5  139.29    5.30
  -1   6  -6    1.30    1.30
  -1   6  -6    0.60    1.30
   1   6   6    1.30    1.20
  -1   6  -6    0.50    1.30
   1   6   6    0.30    1.50
  -1  -6  -6    0.30    1.40
   1  -6   6   -0.20    1.30
  -1  -6  -6   -0.70    1.00
   1  -6   6    1.60    1.50
   1  -6   6   -1.30    1.00
  -1   6  -7    7.80    1.60
  -1   6  -7    3.20    1.60
   1   6   7    4.80    1.80
   1   6   7    3.90    1.20
   1   6   7    2.50    1.30
  -1   6  -7    4.60    1.60
   1  -6   7    3.60    1.80
  -1  -6  -7    3.70    1.80
  -1  -6  -7    3.20    1.50
   1  -6   7    3.00    1.40
  -1  -6  -7    5.00    1.10
   1  -6   7    5.10    1.60
  -1   6  -8   54.59    3.40
   1   6   8   49.80    2.50
   1   6   8   48.70    3.70
  -1   6  -8   49.10    3.90
   1   6   8   50.09    3.20
  -1  -6  -8   51.39    4.00
   1  -6   8   45.00    3.20
  -1  -6  -8   38.10    3.20
   1  -6   8   42.80    3.60
  -1  -6  -8   47.80    2.40
   1  -6   8   48.60    3.40
  -1   6  -9   86.19    4.40
   1   6   9   87.69    4.30
  -1   6  -9   83.09    5.00
   1   6   9   77.29    4.80
   1  -6   9   80.49    4.40
   1  -6   9   73.49    4.20
  -1  -6  -9   82.69    5.20
  -1  -6  -9   84.09    2.80
  -1   6 -10    2.00    2.10
   1   6  10    1.40    1.90
   1   6  10    0.80    1.60
  -1   6 -10    2.70    1.80
   1  -6  10   -1.20    1.80
   1  -6  10    2.00    1.70
  -1  -6 -10    2.90    2.10
   1   6  11   23.30    3.50
  -1   6 -11   27.50    3.60
  -1   6 -11   24.10    3.10
   1   6  11   29.10    3.50
   1  -6  11   23.70    3.00
   1  -6  11   16.90    2.70
  -1  -6 -11   19.00    3.40
  -1   6 -12    5.70    2.30
   1   6  12    2.00    2.30
   1   6  12    2.10    2.20
  -1   6 -12    5.80    2.70
  -1  -6 -12   -1.50    2.40
   1  -6  12    3.00    2.20
   1  -6  12    3.00    2.20
  -1   6 -13    4.60    2.90
   1   6  13    9.50    2.70
  -1   6 -13    9.40    2.80
  -1  -6 -13    8.70    3.80
   1  -6  13   12.60    3.00
   1  -6  13   10.30    2.60
   1   6  14    3.90    2.80
   1   6  14    7.80    3.20
  -1   6 -14    5.20    3.10
  -1   6 -14    5.00    2.90
  -1  -6 -14    2.00    3.30
   1  -6  14    3.10    2.60
  -1   6 -15   10.60    3.50
   1   6  15    6.30    3.10
   1   6  15    3.10    3.50
  -1   6 -15    7.00    3.70
   1  -6  15    9.60    3.00
  -1  -6 -15   10.70    4.00
   1  -6  15    8.10    3.40
  -1   6 -16    1.60    3.70
   1   6  16    0.70    3.50
  -1   6 -16    1.10    4.20
   1   6  16   -0.60    3.60
   1  -6  16   -0.20    3.20
  -1  -6 -16   -0.90    4.50
   1  -6  16    2.90    3.80
   1   6  17   -6.30    4.10
   1   6  17   -4.30    4.20
  -1   6 -17    0.10    4.80
   1  -6  17    9.00    4.20
  -1  -6 -17    4.90    4.80
  -1   7  17   46.80    5.60
  -1   7  17   49.90    6.40
   1   7 -17   43.60    6.70
  -1  -7  17   34.90    5.60
   1  -7 -17   37.10    6.60
  -1   7  16   72.69    6.90
   1   7 -16   59.99    7.30
  -1   7  16   72.79    7.20
   1  -7 -16   66.09    7.60
  -1  -7  16   66.99    6.50
  -1   7  15   51.59    5.70
   1   7 -15   58.89    7.00
  -1   7  15   39.90    4.80
   1  -7 -15   36.40    5.50
  -1  -7  15   34.40    4.60
  -1  -7  15   46.70    5.30
  -1   7  14   85.89    6.50
   1   7 -14   78.19    6.60
   1   7 -14   86.89    5.60
  -1   7  14   91.09    6.10
  -1  -7  14   70.79    5.70
   1  -7 -14   82.29    6.90
  -1   7  13   63.89    5.00
   1   7 -13   64.99    4.80
   1   7 -13   51.99    6.80
  -1   7  13   64.99    5.70
   1  -7 -13   65.49    6.50
  -1  -7  13   59.19    5.00
  -1  -7  13   64.09    5.30
   1   7 -12   93.59    6.50
  -1   7  12   93.19    5.30
  -1   7  12   96.19    6.20
   1   7 -12   87.79    5.00
  -1  -7  12   89.99    5.30
  -1  -7  12   88.59    5.20
   1  -7 -12   81.79    9.70
  -1   7  11   86.69    5.90
  -1   7  11   91.79    4.90
   1   7 -11   87.39    4.70
   1   7 -11   83.69    6.10
  -1  -7  11   98.89    5.30
   1  -7 -11   91.89    3.10
   1  -7 -11   89.29    6.10
  -1  -7  11   93.69    5.20
  -1   7  10  129.09    6.60
  -1   7  10  127.29    5.50
   1   7 -10  125.59    6.50
   1   7 -10  132.89    5.50
  -1   7  10  126.99    4.50
  -1  -7  10  124.09    5.70
   1  -7 -10  127.29    4.30
   1  -7 -10  129.79    7.00
  -1  -7  10  123.29    6.10
  -1   7   9   91.59    5.30
  -1   7   9   87.79    3.90
   1   7  -9  103.49    4.50
   1   7  -9   87.79    5.60
  -1   7   9   97.59    4.40
   1  -7  -9   90.49    3.70
  -1  -7   9   92.19    5.20
   1  -7  -9   89.69    5.70
  -1  -7   9   88.39    4.70
  -1  -7   9   93.39    4.60
   1   7  -8  103.29    5.60
   1   7  -8  108.99    4.70
  -1   7   8  118.39    5.80
  -1   7   8  116.89    4.60
  -1   7   8  106.39    4.40
  -1  -7   8  116.29    4.80
   1  -7  -8  112.49    6.00
   1  -7  -8  109.99    4.70
  -1  -7   8  105.39    4.90
   1  -7  -8  111.49    4.20
  -1  -7   8  106.29    5.20
   1   7  -7   39.60    3.60
   1   7  -7   33.90    2.80
  -1   7   7   37.80    3.00
  -1   7   7   34.70    3.40
   1   7  -7   43.50    3.10
   1  -7  -7   38.90    2.70
  -1  -7   7   41.30    3.20
   1  -7  -7   41.30    2.80
  -1  -7   7   37.10    3.30
  -1  -7   7   38.20    2.70
   1  -7  -7   39.00    3.80
  -1   7   6   23.30    2.90
  -1   7   6   27.50    1.90
   1   7  -6   23.20    2.80
   1   7  -6   26.00    2.50
   1   7  -6   27.10    2.50
  -1   7   6   22.80    2.30
  -1  -7   6   25.60    2.80
   1  -7  -6   22.90    3.00
   1  -7  -6   25.60    2.30
  -1  -7   6   26.70    2.20
  -1  -7   6   23.30    2.70
   1   7  -5   27.50    2.50
  -1   7   5   32.90    1.80
   1   7  -5   26.40    2.90
  -1   7   5   31.30    2.80
   1   7  -5   35.20    2.30
  -1   7   5   35.40    3.20
  -1  -7   5   28.00    2.00
  -1  -7   5   31.70    2.80
   1  -7  -5   25.60    3.10
  -1  -7   5   27.80    2.80
   1  -7  -5   32.50    2.40
   1   7  -4   11.30    1.80
  -1   7   4   12.90    1.90
  -1   7   4   13.50    1.10
   1   7  -4   13.90    1.60
  -1   7   4   13.80    2.20
   1   7  -4   10.50    2.00
  -1   7   4   11.50    1.00
   1  -7  -4   12.40    2.30
  -1  -7   4    9.20    1.80
   1  -7  -4   11.20    1.70
  -1  -7   4   13.50    1.40
  -1  -7   4   10.80    1.90
   1   7  -3    2.10    1.30
   1   7  -3    2.30    0.70
  -1   7   3   -0.30    1.40
  -1   7   3    0.60    1.30
   1   7  -3    4.50    1.40
  -1  -7   3    0.90    1.10
   1  -7  -3    0.70    1.40
  -1  -7   3   -2.40    1.50
  -1  -7   3    1.90    0.70
   1  -7  -3    0.60    1.10
   1   7  -2   -0.10    1.10
   1   7  -2    0.60    0.50
   1   7  -2    1.60    1.30
  -1   7   2   -0.60    1.40
  -1   7   2    1.20    1.30
  -1  -7   2    2.10    1.30
  -1  -7   2    0.30    0.40
   1  -7  -2   -0.20    1.30
   1  -7  -2    1.60    1.20
  -1  -7   2    0.60    1.40
  -1   7   1    2.20    1.30
   1   7  -1    1.30    0.20
   1   7  -1    2.00    1.30
   1  -7  -1    0.80    1.20
  -1  -7   1   -1.90    1.30
  -1  -7   1    0.40    1.20
   1   7   0   22.10    2.40
  -1   7   0   23.90    2.40
   1  -7   0   20.70    2.30
  -1  -7   0   24.50    2.60
  -1  -7   0   17.80    2.10
  -1   7  -1   13.10    1.90
  -1   7  -1    8.60    1.70
   1   7   1   11.30    1.90
   1   7   1   10.30    3.10
  -1  -7  -1   11.50    1.70
   1  -7   1   10.40    1.80
   1  -7   1    7.90    1.90
  -1   7  -2   19.90    2.40
   1   7   2   19.70    0.90
  -1   7  -2   21.70    2.50
   1   7   2   18.40    2.30
   1   7   2   23.60    2.70
   1   7   2   20.10    0.90
   1  -7   2   20.40    0.90
  -1  -7  -2   22.20    2.20
   1  -7   2   14.40    2.10
  -1  -7  -2   20.30    2.60
   1  -7   2   18.80    2.30
   1   7   3   62.79    3.40
   1   7   3   65.69    2.30
   1   7   3   68.39    2.20
   1   7   3   67.29    3.90
  -1   7  -3   63.99    3.70
  -1   7  -3   69.29    3.70
  -1  -7  -3   61.59    4.00
  -1  -7  -3   66.49    3.30
   1  -7   3   67.59    3.80
   1  -7   3   64.89    2.30
   1  -7   3   63.29    3.80
  -1   7  -4   44.50    2.30
   1   7   4   46.30    2.10
   1   7   4   41.40    3.30
  -1   7  -4   47.20    3.20
  -1   7  -4   45.50    3.40
   1   7   4   49.00    2.10
   1   7   4   48.90    3.20
   1  -7   4   46.70    3.40
  -1  -7  -4   46.60    3.60
   1  -7   4   39.70    3.20
  -1  -7  -4   43.30    2.80
   1  -7   4   45.30    2.20
  -1   7  -5   31.90    3.00
  -1   7  -5   38.40    2.40
   1   7   5   34.90    2.20
   1   7   5   35.40    3.20
   1   7   5   41.90    2.90
  -1   7  -5   32.80    2.70
   1   7   5   36.60    2.10
   1  -7   5   35.60    3.10
  -1  -7  -5   36.20    2.60
   1  -7   5   37.10    2.30
   1  -7   5   34.80    3.20
  -1  -7  -5   37.30    3.50
  -1   7  -6  153.18    6.50
   1   7   6  160.68    5.60
  -1   7  -6  159.58    6.00
  -1   7  -6  157.98    5.50
   1   7   6  160.68    6.70
  -1  -7  -6  154.68    6.80
   1  -7   6  152.18    6.20
   1  -7   6  161.48    5.40
  -1  -7  -6  156.28    5.40
   1   7   7   40.30    2.80
   1   7   7   40.90    2.90
  -1   7  -7   40.00    3.20
   1   7   7   43.80    3.70
  -1   7  -7   42.70    3.20
  -1   7  -7   38.90    3.50
  -1  -7  -7   40.40    2.60
   1  -7   7   41.70    3.40
   1  -7   7   41.80    2.90
  -1  -7  -7   37.80    3.80
   1   7   8  149.49    5.20
   1   7   8  152.78    5.70
  -1   7  -8  155.98    6.80
   1   7   8  149.99    6.80
  -1   7  -8  149.39    6.00
   1  -7   8  138.79    6.20
   1  -7   8  156.68    5.80
  -1  -7  -8  158.88    7.40
  -1  -7  -8  141.39    5.00
   1   7   9  116.39    5.10
   1   7   9  115.49    4.20
   1   7   9  110.39    6.00
  -1   7  -9  110.79    5.30
  -1   7  -9  113.59    6.00
   1  -7   9  121.59    5.90
  -1  -7  -9  113.29    4.00
   1  -7   9  116.39    5.20
  -1  -7  -9  119.79    6.60
  -1   7 -10  167.08    7.50
  -1   7 -10  162.08    6.70
   1   7  10  160.38    7.60
   1   7  10  164.48    6.60
  -1  -7 -10  165.18    4.80
   1  -7  10  164.58    7.00
   1  -7  10  166.58    6.80
  -1  -7 -10  170.38    8.10
  -1   7 -11  100.49    5.40
   1   7  11   99.99    6.20
   1   7  11   90.89    5.20
  -1   7 -11   93.59    5.90
   1  -7  11   92.09    5.30
   1  -7  11   97.09    5.50
  -1  -7 -11   88.29    6.40
   1   7  12   78.79    5.10
  -1   7 -12   86.39    5.30
  -1   7 -12   76.89    6.10
   1   7  12   81.99    6.00
  -1  -7 -12   78.79    6.30
   1  -7  12   80.29    5.20
   1  -7  12   79.89    5.10
  -1   7 -13   91.29    5.90
   1   7  13   87.79    6.00
   1   7  13  100.29    6.60
   1  -7  13  104.69    6.40
   1  -7  13   92.99    5.80
  -1  -7 -13   95.89    7.10
  -1   7 -14  100.29    7.10
  -1   7 -14   92.59    6.50
   1   7  14  104.79    7.20
   1   7  14   97.59    6.50
   1  -7  14   83.59    6.30
  -1  -7 -14  105.89    7.70
   1  -7  14  100.59    6.90
   1   7  15   53.49    6.20
   1   7  15   70.49    6.40
  -1   7 -15   57.99    6.30
  -1   7 -15   64.39    7.50
   1  -7  15   63.69    6.70
   1  -7  15   54.29    5.70
  -1  -7 -15   56.49    7.10
  -1   7 -16   49.70    6.30
   1   7  16   56.89    6.80
   1   7  16   55.29    6.90
  -1  -7 -16   70.59    8.00
   1  -7  16   48.20    7.20
   1  -7  16   46.90    6.00
  -1   8  16   12.00    4.20
   1   8 -16    3.90    5.00
  -1   8  16    7.80    4.80
  -1  -8  16   17.80    4.50
   1  -8 -16    8.50    5.20
  -1  -8  16   -1.10    4.30
   1   8 -15    4.20    4.30
  -1   8  15    4.50    4.00
  -1   8  15    1.60    3.50
   1  -8 -15   -3.70    4.30
  -1  -8  15   -8.20    3.30
  -1  -8  15    7.70    3.50
  -1   8  14    9.10    3.30
   1   8 -14   16.90    4.40
  -1   8  14   14.40    4.10
  -1  -8  14    7.90    3.60
   1  -8 -14    7.00    4.10
  -1  -8  14    7.30    3.30
  -1   8  13    3.00    2.70
   1   8 -13    3.20    3.40
  -1   8  13   -4.60    2.90
   1   8 -13    4.40    2.70
   1  -8 -13   -0.50    3.40
  -1  -8  13    3.40    2.90
  -1  -8  13    0.30    3.10
  -1   8  12   52.89    4.70
  -1   8  12   54.89    5.50
   1   8 -12   61.79    4.70
   1   8 -12   56.69    5.60
   1  -8 -12   51.49    5.70
  -1  -8  12   58.19    5.00
  -1  -8  12   65.99    5.50
  -1   8  11    1.20    2.00
   1   8 -11    0.10    2.60
   1   8 -11   -0.70    2.00
  -1  -8  11    0.20    2.30
  -1  -8  11   -0.50    2.20
   1   8 -10   46.30    4.60
  -1   8  10   45.50    4.60
  -1   8  10   49.80    3.80
   1   8 -10   46.70    3.90
  -1  -8  10   42.80    3.90
  -1  -8  10   49.70    4.40
   1  -8 -10   45.10    5.20
   1  -8 -10   51.29    3.20
   1   8  -9    5.60    2.40
  -1   8   9    3.60    2.40
   1   8  -9    4.50    2.00
  -1   8   9    5.50    1.80
   1  -8  -9    3.70    2.60
   1  -8  -9    5.70    1.70
  -1  -8   9    3.80    2.70
  -1  -8   9    3.90    1.80
  -1   8   8  179.88    6.70
  -1   8   8  200.58    6.40
   1   8  -8  189.08    6.80
  -1   8   8  185.88    8.00
   1   8  -8  193.88    8.30
  -1  -8   8  195.48    7.70
   1  -8  -8  182.28    8.30
   1  -8  -8  185.08    6.40
  -1  -8   8  190.58    6.70
   1   8  -7    1.50    1.70
  -1   8   7   -2.70    2.00
   1   8  -7    8.10    2.10
   1   8  -7    4.20    1.90
  -1   8   7    0.50    1.20
  -1   8   7    0.90    2.10
  -1  -8   7    0.20    1.90
   1  -8  -7    2.60    1.50
  -1  -8   7    4.30    1.40
   1  -8  -7    1.80    2.00
   1   8  -6  162.78    6.90
  -1   8   6  154.48    4.90
  -1   8   6  162.98    7.00
   1   8  -6  158.98    5.50
   1   8  -6  157.88    6.10
  -1  -8   6  161.48    6.70
   1  -8  -6  155.98    7.40
   1  -8  -6  157.38    5.80
  -1  -8   6  155.88    5.30
  -1   8   5   -0.80    1.60
   1   8  -5    0.70    1.60
  -1   8   5   -1.90    0.70
   1   8  -5   -0.50    1.20
   1   8  -5    2.10    1.60
  -1  -8   5   -4.20    1.50
  -1  -8   5    0.40    1.00
   1  -8  -5    0.50    1.40
   1  -8  -5    0.90    1.80
   1   8  -4  127.99    5.30
  -1   8   4  125.19    5.90
   1   8  -4  135.59    4.20
   1   8  -4  134.59    6.00
   1  -8  -4  125.39    5.20
   1  -8  -4  124.89    6.30
  -1  -8   4  129.79    5.70
  -1  -8   4  128.09    4.10
   1   8  -3    2.80    1.60
   1   8  -3    3.40    1.50
  -1   8   3    3.10    1.70
  -1  -8   3    0.40    0.70
   1  -8  -3    4.70    1.90
  -1  -8   3    6.40    1.90
   1  -8  -3    2.60    1.50
   1   8  -2  279.27    6.70
  -1   8   2  276.57    9.40
   1   8  -2  269.77    8.90
   1   8  -2  266.47    9.40
  -1  -8   2  283.17    9.30
   1  -8  -2  288.57    9.90
   1  -8  -2  291.17    9.10
   1   8  -1    0.60    1.40
  -1   8   1    0.70    1.50
   1   8  -1    3.50    1.50
   1  -8  -1    2.00    1.50
  -1  -8   1    3.30    1.70
   1   8   0  133.49    5.70
  -1   8   0  131.99    5.70
  -1  -8   0  136.19    5.60
   1  -8   0  133.49    5.70
   1   8   1    6.00    1.80
  -1   8  -1    2.70    1.70
  -1   8  -1    3.90    1.80
  -1  -8  -1    2.60    1.50
   1  -8   1    3.50    1.70
   1   8   2  200.08    7.50
  -1   8  -2  190.78    7.30
  -1   8  -2  188.28    7.10
   1  -8   2  198.28    7.30
  -1  -8  -2  196.08    7.80
  -1  -8  -2  201.98    7.10
  -1   8  -3    3.00    1.60
   1   8   3    1.30    0.50
  -1   8  -3    2.20    1.50
   1   8   3    0.50    0.50
   1   8   3    2.40    1.70
   1  -8   3   -0.10    1.50
   1  -8   3   -0.20    0.60
  -1  -8  -3    3.20    1.40
  -1  -8  -3    3.70    1.80
  -1   8  -4  119.19    5.60
   1   8   4  121.89    5.70
  -1   8  -4  116.39    5.30
  -1   8  -4  122.79    3.80
   1   8   4  118.39    3.60
  -1  -8  -4  116.79    4.90
  -1  -8  -4  119.69    6.00
   1  -8   4  107.99    5.40
   1  -8   4  121.69    3.80
   1   8   5   17.70    1.80
   1   8   5   20.60    1.90
  -1   8  -5   18.00    2.50
   1   8   5   15.00    2.60
  -1   8  -5   18.40    2.70
  -1   8  -5   21.50    2.10
  -1  -8  -5   15.40    2.70
   1  -8   5   18.20    2.70
  -1  -8  -5   21.90    2.50
   1  -8   5   19.40    2.00
   1   8   6  146.99    5.90
   1   8   6  157.68    5.10
  -1   8  -6  157.98    5.40
   1   8   6  157.58    6.80
   1   8   6  151.68    5.10
  -1   8  -6  146.79    6.10
  -1   8  -6  151.48    6.60
  -1  -8  -6  156.38    5.70
  -1  -8  -6  146.99    7.20
   1  -8   6  142.29    6.40
   1  -8   6  158.08    5.30
  -1   8  -7   10.80    2.40
  -1   8  -7    5.60    2.10
   1   8   7   11.70    2.30
  -1   8  -7   11.10    2.30
   1   8   7    7.00    1.60
   1   8   7   12.70    2.70
  -1  -8  -7    8.90    1.70
   1  -8   7    7.10    2.30
   1  -8   7    9.60    1.80
  -1  -8  -7   10.10    2.70
   1   8   8   57.79    4.70
   1   8   8   57.69    3.80
   1   8   8   49.40    3.40
  -1   8  -8   44.30    3.80
  -1   8  -8   42.70    4.20
   1  -8   8   52.59    4.20
  -1  -8  -8   46.50    4.80
  -1  -8  -8   50.29    3.10
   1  -8   8   50.19    3.50
   1   8   9    2.20    2.40
  -1   8  -9    2.40    2.10
   1   8   9    2.40    1.80
  -1   8  -9    4.80    2.20
   1  -8   9    5.70    2.50
  -1  -8  -9    4.90    1.60
   1  -8   9    1.80    1.90
  -1  -8  -9    2.80    2.40
  -1   8 -10   41.70    4.30
   1   8  10   38.90    4.50
  -1   8 -10   40.30    4.80
   1   8  10   44.90    3.90
  -1  -8 -10   47.80    5.10
   1  -8  10   42.90    4.00
  -1  -8 -10   46.10    2.80
   1  -8  10   39.60    4.50
  -1   8 -11   10.70    2.80
   1   8  11    7.50    2.50
  -1   8 -11    8.70    3.30
   1   8  11    6.70    3.10
   1  -8  11    6.60    2.80
   1  -8  11    8.70    2.50
  -1  -8 -11   11.20    3.40
  -1   8 -12    6.80    5.60
  -1   8 -12   10.00    3.00
   1   8  12   10.20    3.40
   1   8  12   10.70    2.90
   1  -8  12    9.40    3.00
  -1  -8 -12   12.50    3.70
   1  -8  12    7.40    2.80
   1   8  13   13.20    3.30
  -1   8 -13   12.10    3.40
   1   8  13   15.90    3.80
  -1   8 -13   11.50    3.90
  -1  -8 -13   15.40    4.20
   1  -8  13    8.20    3.20
  -1   8 -14    2.20    3.30
  -1   8 -14   -1.90    4.00
   1   8  14   12.40    4.00
   1   8  14    5.70    4.80
   1  -8  14    3.40    3.70
   1  -8  14    3.00    3.40
  -1  -8 -14   -3.50    4.10
   1   8  15   11.60    4.70
  -1   8 -15   -4.40    4.10
   1   8  15   -4.80    3.50
  -1  -8 -15    0.20    4.20
   1  -8  15    1.70    3.90
   1  -8  15   -3.90    3.80
  -1   9  15    8.40    4.80
   1   9 -15   21.00    5.50
  -1   9  15   16.90    5.10
   1  -9 -15   14.10    5.10
  -1  -9  15    9.40    4.10
  -1  -9  15   17.20    4.60
   1   9 -14   69.59    7.90
  -1   9  14   62.79    7.10
  -1   9  14   68.49    6.30
  -1  -9  14   72.39    6.90
   1  -9 -14   82.59    8.00
  -1  -9  14   70.49    6.80
  -1   9  13   34.50    4.10
   1   9 -13   47.70    6.20
  -1   9  13   31.00    4.80
  -1  -9  13   34.40    4.50
  -1  -9  13   33.10    4.10
   1  -9 -13   38.70    5.70
   1   9 -12   78.29    6.60
   1   9 -12   83.59    5.60
  -1   9  12   82.29    5.40
  -1   9  12   73.49    7.00
  -1  -9  12   83.79    5.70
   1  -9 -12   91.79    7.10
  -1  -9  12   83.59    6.70
   1   9 -11    9.50    2.80
   1   9 -11   11.00    3.50
  -1   9  11   12.30    2.50
  -1   9  11    8.80    3.30
  -1  -9  11   11.60    2.80
   1  -9 -11    9.00    3.60
  -1  -9  11    7.10    3.80
  -1   9  10   92.19    4.80
   1   9 -10   92.49    5.30
  -1   9  10   94.09    6.30
   1   9 -10   89.79    6.30
  -1  -9  10   91.29    5.10
  -1  -9  10   94.89    6.00
   1  -9 -10   97.89    6.90
   1  -9 -10   99.39    4.50
  -1   9   9   24.10    2.50
   1   9  -9   27.60    3.10
  -1   9   9   29.90    4.10
   1   9  -9   31.60    4.10
  -1  -9   9   25.20    3.60
  -1  -9   9   24.50    2.70
   1  -9  -9   23.80    4.00
   1  -9  -9   23.60    2.60
   1   9  -8   67.89    4.50
  -1   9   8   72.99    3.70
  -1   9   8   69.19    5.40
   1   9  -8   68.29    5.30
   1  -9  -8   75.99    4.20
  -1  -9   8   69.29    5.30
  -1  -9   8   72.69    4.00
   1  -9  -8   69.19    5.60
  -1   9   7   18.80    3.20
   1   9  -7   14.80    2.50
  -1   9   7   20.20    2.00
   1   9  -7   18.90    3.40
  -1  -9   7   19.90    2.50
   1  -9  -7   22.70    2.90
  -1  -9   7   21.00    3.10
   1  -9  -7   14.70    3.40
   1   9  -6   91.29    4.00
   1   9  -6   88.29    4.60
   1   9  -6   90.69    5.50
  -1   9   6   90.19    3.00
  -1   9   6   86.89    5.50
   1  -9  -6   90.29    4.50
   1  -9  -6   89.59    5.80
  -1  -9   6   85.79    5.40
   1   9  -5   22.30    2.20
   1   9  -5   23.70    3.00
   1   9  -5   18.00    3.00
  -1   9   5   15.00    2.80
   1  -9  -5   27.10    3.00
   1  -9  -5   20.90    3.30
  -1  -9   5   18.80    2.90
  -1  -9   5   23.30    1.90
   1   9  -4    7.60    2.10
  -1   9   4    2.90    1.90
   1   9  -4    6.10    1.90
   1   9  -4    5.70    1.40
  -1  -9   4    3.70    1.90
  -1  -9   4    4.60    0.90
   1  -9  -4    2.70    1.80
   1  -9  -4    3.50    2.20
   1   9  -3    6.60    2.20
  -1   9   3    2.70    2.00
   1   9  -3    5.10    1.90
   1  -9  -3    2.00    1.70
  -1  -9   3    5.40    2.10
   1  -9  -3    5.20    2.30
   1   9  -2    3.90    1.90
   1   9  -2    1.00    1.60
  -1   9   2    4.00    1.90
   1  -9  -2    5.70    2.00
  -1  -9   2    1.20    1.80
   1   9  -1    1.00    1.80
   1   9  -1   -2.90    1.50
  -1   9   1   -2.30    1.60
  -1  -9   1    1.60    1.60
   1  -9  -1   -2.00    1.50
   1   9   0    2.50    1.90
  -1   9   0    0.60    1.70
  -1  -9   0    2.50    1.70
   1  -9   0    4.60    1.90
  -1   9  -1    0.50    1.80
  -1   9  -1    1.50    1.80
   1   9   1    0.30    1.70
  -1  -9  -1   -1.90    1.50
   1  -9   1    0.40    1.60
  -1   9  -2   17.50    2.70
   1   9   2   19.40    2.80
  -1   9  -2   17.00    2.50
  -1  -9  -2   21.20    2.70
   1  -9   2   17.70    2.60
  -1   9  -3   26.50    3.30
  -1   9  -3   27.80    3.60
   1   9   3   26.00    3.30
  -1  -9  -3   26.90    3.10
   1  -9   3   25.90    3.10
  -1  -9  -3   24.10    3.30
   1   9   4   41.80    3.90
  -1   9  -4   39.10    3.60
   1   9   4   44.80    1.40
   1   9   4   39.80    1.30
  -1   9  -4   41.60    4.10
   1  -9   4   40.90    3.70
  -1  -9  -4   42.70    4.20
   1  -9   4   40.00    1.80
  -1  -9  -4   34.90    3.20
  -1   9  -5    5.20    2.20
   1   9   5    5.50    1.00
  -1   9  -5    3.80    2.10
   1   9   5    5.10    2.30
   1   9   5    6.20    1.30
  -1  -9  -5    7.50    2.50
   1  -9   5    6.30    1.20
  -1  -9  -5    4.20    1.80
   1  -9   5    3.90    2.20
   1   9   6   69.99    3.00
   1   9   6   66.89    4.90
  -1   9  -6   61.79    4.40
  -1   9  -6   65.89    4.70
  -1   9  -6   69.09    3.50
   1   9   6   65.89    3.10
  -1  -9  -6   67.79    3.90
   1  -9   6   63.89    4.60
  -1  -9  -6   64.99    5.10
  -1   9  -7    8.90    2.80
   1   9   7    7.30    2.80
  -1   9  -7    6.50    2.20
   1   9   7   12.40    2.20
  -1  -9  -7    8.30    2.00
   1  -9   7   11.60    2.80
   1  -9   7   10.40    1.80
  -1  -9  -7    7.00    3.20
  -1   9  -8  143.69    7.30
   1   9   8  139.99    5.30
  -1   9  -8  133.49    6.30
   1   9   8  131.79    7.10
   1  -9   8  128.49    5.40
   1  -9   8  145.09    7.20
  -1  -9  -8  143.19    5.50
  -1  -9  -8  133.89    7.50
  -1   9  -9    8.20    2.90
  -1   9  -9    5.80    2.50
   1   9   9    7.60    2.10
  -1  -9  -9   10.10    2.00
   1  -9   9    2.20    2.00
   1  -9   9    5.30    2.90
  -1   9 -10   84.59    5.50
   1   9  10   81.39    6.10
  -1   9 -10   79.99    6.40
   1   9  10   92.39    5.00
   1  -9  10   80.69    6.80
  -1  -9 -10   82.89    6.60
   1  -9  10   79.09    4.90
   1   9  11   12.90    2.80
  -1   9 -11   16.20    3.90
   1   9  11   17.00    3.70
  -1   9 -11   13.70    3.20
   1  -9  11    5.90    3.00
   1  -9  11   14.30    2.90
  -1  -9 -11   15.80    4.20
   1   9  12  101.39    7.70
   1   9  12   87.79    5.80
  -1   9 -12  104.89    7.60
  -1   9 -12   88.49    6.40
  -1  -9 -12   95.09    8.00
   1  -9  12   94.59    6.30
   1  -9  12   86.39    6.90
  -1   9 -13   21.20    4.10
   1   9  13   19.60    3.70
   1   9  13   22.10    4.80
  -1   9 -13   22.10    4.90
  -1  -9 -13   21.50    5.10
   1  -9  13   14.10    3.80
   1  -9  13   21.30    3.90
   1   9  14   92.19    8.50
  -1   9 -14  102.19    8.90
   1  -9  14   94.59    7.60
  -1  -9 -14  101.19    8.70
   1  -9  14   97.89    7.60
   1   9  15   14.10    5.10
   1  10 -14    3.00    5.00
  -1  10  14    3.10    5.00
  -1 -10  14   -1.30    4.00
   1 -10 -14    5.60    4.80
   1  10 -13   28.50    5.60
  -1  10  13   35.10    5.50
  -1 -10  13   33.80    5.10
  -1 -10  13   19.30    4.00
   1 -10 -13   30.90    5.90
   1  10 -12   -5.90    3.80
  -1  10  12   -3.30    3.80
   1 -10 -12   -1.70    3.90
  -1 -10  12   -3.90    2.80
  -1 -10  12    5.20    3.60
  -1  10  11   44.30    5.50
   1  10 -11   39.50    4.20
   1  10 -11   42.20    5.40
   1 -10 -11   43.70    6.10
  -1 -10  11   48.90    5.60
  -1 -10  11   49.90    4.70
   1  10 -10    8.10    3.40
   1  10 -10    3.80    2.70
  -1  10  10    8.10    3.30
   1 -10 -10   10.10    3.20
   1 -10 -10    5.50    3.50
  -1 -10  10    6.80    3.20
  -1 -10  10    5.40    2.40
   1  10  -9   49.80    5.70
   1  10  -9   39.40    4.30
  -1  10   9   50.79    5.30
   1 -10  -9   44.90    3.90
   1 -10  -9   43.90    5.50
  -1 -10   9   59.19    5.30
  -1 -10   9   43.30    3.90
   1  10  -8   20.10    4.30
   1  10  -8   16.30    3.00
  -1  10   8   21.80    3.80
  -1 -10   8   12.90    5.30
   1 -10  -8   20.10    2.80
  -1 -10   8   17.20    2.30
   1 -10  -8   19.50    4.20
   1  10  -7  106.79    6.50
  -1  10   7  107.29    6.50
   1  10  -7  101.49    5.60
  -1 -10   7  110.59    6.30
  -1 -10   7   99.19    4.30
   1 -10  -7  109.49    5.40
   1 -10  -7   98.09    6.80
   1  10  -6   26.00    3.30
  -1  10   6   23.20    3.60
   1  10  -6   22.50    3.70
   1 -10  -6   23.20    3.00
  -1 -10   6   22.10    3.50
  -1 -10   6   18.90    2.30
   1 -10  -6   26.50    4.10
  -1  10   5  164.88    7.80
   1  10  -5  162.68    6.90
   1  10  -5  175.98    7.90
  -1 -10   5  178.58    7.80
   1 -10  -5  169.38    8.20
  -1 -10   5  166.98    4.90
   1 -10  -5  170.68    6.90
   1  10  -4   31.90    3.90
   1  10  -4   29.20    3.30
  -1  10   4   23.20    3.40
  -1 -10   4   22.60    3.40
   1 -10  -4   27.60    4.00
   1 -10  -4   33.10    3.70
   1  10  -3  113.19    6.20
  -1  10   3  111.39    6.20
   1  10  -3  120.99    5.90
  -1 -10   3  113.09    6.00
   1 -10  -3  114.39    5.70
   1  10  -2   26.50    3.30
  -1  10   2   27.40    3.60
   1  10  -2   29.30    3.70
  -1 -10   2   28.80    3.50
   1 -10  -2   30.60    3.40
   1  10  -1  177.78    7.40
   1  10  -1  182.88    7.90
  -1  10   1  185.08    7.80
   1 -10  -1  185.88    7.50
  -1 -10   1  181.38    7.70
  -1  10   0   14.60    2.70
   1  10   0    6.90    2.50
   1  10   0   11.10    2.70
  -1  10   0   13.20    2.60
  -1 -10   0   11.40    2.70
   1 -10   0   10.20    2.40
  -1  10  -1  134.09    6.70
  -1  10  -1  146.89    6.80
   1  10   1  146.49    6.70
  -1 -10  -1  146.09    6.50
   1 -10   1  149.79    6.70
   1  10   2   11.60    2.80
  -1  10  -2   15.40    2.70
  -1  10  -2   14.60    2.80
   1 -10   2   12.50    2.60
  -1 -10  -2   13.70    2.60
  -1  10  -3  134.79    6.50
   1  10   3  135.79    9.00
  -1  10  -3  132.29    6.70
   1 -10   3  141.89    6.70
  -1 -10  -3  139.99    6.40
  -1  10  -4   27.80    3.60
   1  10   4   30.40    3.90
  -1  10  -4   27.70    3.40
  -1 -10  -4   28.30    3.90
  -1 -10  -4   22.00    3.00
   1 -10   4   25.50    3.50
  -1  10  -5   94.09    5.50
   1  10   5   95.29    6.00
  -1  10  -5   95.69    6.00
  -1 -10  -5   97.59    6.40
   1 -10   5   98.69    6.20
  -1 -10  -5  101.49    5.20
   1 -10   5   91.39    3.20
  -1  10  -6   31.90    3.90
   1  10   6   24.70    3.60
  -1  10  -6   27.70    3.70
   1  10   6   22.70    1.90
  -1 -10  -6   28.50    3.40
   1 -10   6   25.40    2.40
   1 -10   6   26.80    3.70
  -1 -10  -6   25.10    4.00
   1  10   7   69.99    3.20
  -1  10  -7   78.79    5.10
  -1  10  -7   79.19    5.50
   1  10   7   72.59    8.50
   1 -10   7   64.39    6.10
   1 -10   7   67.79    3.60
  -1 -10  -7   70.09    4.50
   1  10   8   17.60    2.20
  -1  10  -8   17.50    3.20
   1  10   8   16.00    3.60
  -1  10  -8   18.20    3.70
  -1 -10  -8   15.90    4.00
  -1 -10  -8   17.00    2.60
   1 -10   8   19.70    2.40
   1 -10   8   15.90    3.50
   1  10   9   39.10    3.90
  -1  10  -9   25.90    4.10
  -1  10  -9   38.80    4.30
   1  10   9   40.80    4.90
  -1 -10  -9   48.90    5.60
   1 -10   9   37.20    4.60
  -1 -10  -9   38.20    3.70
   1 -10   9   30.80    3.70
  -1  10 -10   16.00    3.50
   1  10  10   18.70    3.90
  -1  10 -10   17.10    3.80
   1 -10  10   23.50    4.00
   1 -10  10   13.40    2.80
  -1 -10 -10   13.80    4.30
  -1  10 -11   17.10    3.80
  -1  10 -11   19.70    4.20
   1  10  11   21.10    4.40
   1 -10  11   18.20    4.00
   1 -10  11   16.20    3.20
  -1 -10 -11   16.80    4.70
   1  10  12    7.20    3.90
  -1  10 -12    5.10    4.00
  -1  10 -12    6.30    3.80
   1 -10  12    2.10    3.70
  -1 -10 -12    4.80    4.40
   1 -10  12    3.00    3.30
  -1  10 -13   12.90    4.80
   1  10  13   13.80    4.80
   1 -10  13   17.80    4.70
  -1 -10 -13   20.80    5.60
  -1  11  12   -4.00    4.10
   1  11 -12   -7.10    4.00
  -1 -11  12    4.60    4.20
   1 -11 -12   -2.60    4.70
  -1  11  11   67.89    7.20
   1  11 -11   78.79    7.50
   1 -11 -11   73.29    7.80
  -1 -11  11   81.39    7.00
   1  11 -10   12.60    4.00
  -1  11  10   13.50    4.30
   1  11 -10   12.20    3.50
  -1 -11  10    4.40    3.70
   1 -11 -10    4.80    4.10
   1  11  -9   15.30    3.60
  -1  11   9   12.50    3.90
   1  11  -9   16.50    4.10
  -1 -11   9   17.80    4.20
   1 -11  -9   30.40    5.00
   1 -11  -9   18.30    3.00
  -1  11   8    0.70    3.30
   1  11  -8   -2.30    3.00
   1 -11  -8   -2.00    2.50
  -1 -11   8   -4.40    2.90
   1 -11  -8    6.90    3.60
  -1  11   7   37.60    4.60
   1  11  -7   33.90    4.60
   1  11  -7   29.80    3.70
   1 -11  -7   42.80    5.50
   1 -11  -7   36.40    4.30
  -1 -11   7   38.90    4.90
   1  11  -6    0.40    2.50
  -1  11   6    0.60    3.00
   1  11  -6    0.90    2.70
  -1 -11   6    0.60    3.00
   1 -11  -6    3.00    2.50
   1 -11  -6    0.90    3.20
   1  11  -5   26.10    3.50
   1 -11  -5   32.30    4.60
  -1 -11   5   28.70    4.10
   1 -11  -5   33.40    4.10
   1  11  -4   -3.50    2.40
   1  11  -4   -3.50    2.30
  -1  11   4   -1.80    2.60
   1 -11  -4   -0.10    2.30
   1  11  -3    4.30    2.70
  -1  11   3    1.00    2.50
   1  11  -3    3.70    2.40
  -1 -11   3    0.90    2.40
   1 -11  -3    4.00    2.50
  -1  11   2   -2.10    2.40
   1  11  -2    5.60    2.60
   1  11  -2    3.10    2.40
   1 -11  -2    4.00    2.30
  -1 -11   2    4.30    2.40
   1  11  -1   -2.20    2.20
  -1  11   1    2.30    2.60
   1  11  -1    1.80    2.40
   1 -11  -1    1.20    2.40
  -1 -11   1    0.20    2.40
   1  11   0    0.50    2.30
  -1  11   0    2.10    2.50
  -1  11   0    3.00    2.40
   1  11   0    2.50    2.50
   1 -11   0   -1.30    2.30
  -1 -11   0    3.90    2.40
   1  11   1   17.20    3.30
  -1  11  -1   15.10    3.10
  -1  11  -1   13.70    3.00
   1 -11   1   12.20    2.80
  -1 -11  -1    9.50    2.70
  -1  11  -2    3.60    2.40
   1  11   2    2.60    2.60
  -1  11  -2    1.00    2.50
   1 -11   2    3.40    2.60
  -1 -11  -2    2.90    2.40
  -1  11  -3   45.20    4.70
  -1  11  -3   50.39    4.70
   1  11   3   41.30    4.80
   1 -11   3   39.40    5.00
  -1 -11  -3   45.60    4.50
  -1  11  -4    0.30    2.40
  -1  11  -4    0.40    2.70
   1  11   4    0.30    2.60
  -1 -11  -4   -0.90    2.30
   1 -11   4   -0.60    2.80
  -1  11  -5   48.00    4.80
  -1  11  -5   44.10    4.80
  -1 -11  -5   63.29    4.70
  -1 -11  -5   58.19    5.80
   1 -11   5   44.20    5.30
   1  11   6    1.30    2.90
  -1  11  -6   -0.80    4.70
  -1  11  -6   -1.20    2.50
  -1 -11  -6   -1.50    3.00
   1 -11   6   -1.50    2.70
  -1 -11  -6   -0.10    2.40
  -1  11  -7   59.39    6.20
  -1  11  -7   59.99    5.40
   1  11   7   60.49    5.70
  -1 -11  -7   52.69    6.20
   1 -11   7   55.29    5.50
  -1 -11  -7   60.69    4.70
  -1  11  -8   -2.30    2.90
  -1  11  -8    0.30    3.10
   1  11   8    5.60    3.40
  -1 -11  -8    0.80    3.30
  -1 -11  -8    2.90    2.50
   1 -11   8    0.40    3.30
  -1  11  -9   71.19    6.40
  -1  11  -9   71.99    6.20
   1  11   9   53.89    6.20
   1 -11   9   65.49    6.20
  -1 -11  -9   66.19    7.00
  -1  11 -10   -1.00    3.50
  -1  11 -10    6.60    3.80
   1  11  10   -3.30    3.70
  -1 -11 -10   -0.70    4.10
   1 -11  10    2.80    3.60
   1  11  11   67.69    7.30
  -1  11 -11   63.39    7.60
  -1  11 -11   66.29    8.10
  -1 -11 -11   63.39    7.90
   1 -11  11   58.99    6.80
   1  11  12    1.30    4.50
  -1  11 -12    4.40    4.60
  -1 -11 -12    7.10    5.00
   1 -11  12   -1.00    4.40
   1  12 -11   36.90    6.40
  -1  12  11   17.20    5.70
  -1 -12  11   22.50    5.50
   1 -12 -11   19.20    6.10
   1  12 -10   38.40    5.70
  -1  12  10   28.20    5.20
   1 -12 -10   36.00    6.20
  -1 -12  10   40.70    5.80
   1  12  -9   36.20    5.70
  -1  12   9   45.80    5.70
   1  12  -9   39.10    5.60
  -1 -12   9   24.30    4.70
   1 -12  -9   22.70    5.40
  -1  12   8   86.19    7.60
   1  12  -8   64.39    6.20
   1  12  -8   60.89    6.80
  -1 -12   8   57.19    7.00
   1 -12  -8   79.89    7.50
   1 -12  -8   67.89    5.70
  -1  12   7   17.50    4.30
   1  12  -7   13.30    4.10
   1  12  -7   16.50    3.70
   1 -12  -7   17.00    3.50
  -1 -12   7   25.10    4.40
   1 -12  -7   23.30    4.90
   1  12  -6   41.30    5.20
  -1  12   6   44.40    5.40
   1  12  -6   38.80    5.00
   1 -12  -6   39.70    5.00
   1 -12  -6   34.60    5.20
  -1 -12   6   43.90    5.50
   1  12  -5   87.59    6.40
   1  12  -5   83.79    7.00
  -1  12   5   89.79    6.90
  -1 -12   5   97.69    6.60
   1 -12  -5  104.49    6.50
   1  12  -4   69.99    6.50
  -1  12   4   49.40    5.70
   1  12  -4   66.09    5.60
   1 -12  -4   65.89    5.60
  -1 -12   4   59.69    6.00
   1  12  -3   81.39    5.90
   1  12  -3   73.89    6.60
  -1  12   3   78.49    6.30
  -1 -12   3   67.79    5.90
   1 -12  -3   75.09    6.50
  -1  12   2  133.39    7.50
   1  12  -2  127.09    7.50
   1  12  -2  125.99    7.20
  -1 -12   2  138.49    7.40
   1  12  -1   56.79    5.50
  -1  12   1   50.79    5.40
   1  12  -1   42.60    4.90
   1 -12  -1   58.69    5.10
  -1 -12   1   61.49    5.40
  -1  12   0   40.70    5.00
  -1  12   0   39.10    4.70
   1  12   0   35.10    4.70
   1  12   0   38.60    4.80
   1 -12   0   46.10    4.90
  -1 -12   0   40.00    4.70
   1  12   1   79.69    6.20
   1  12   1   73.49    6.30
  -1  12  -1   88.59    6.50
  -1  12  -1   89.59    6.50
   1 -12   1   81.69    6.00
  -1  12  -2   78.39    6.30
  -1  12  -2   83.59    6.60
   1 -12   2   82.99    6.30
  -1 -12  -2   75.59    6.30
   1  12   3   47.90    5.90
  -1  12  -3   47.80    5.00
  -1  12  -3   47.30    6.00
   1 -12   3   43.40    5.30
  -1 -12  -3   48.80    5.20
  -1  12  -4   57.69    6.30
  -1  12  -4   66.29    5.90
   1  12   4   71.99    6.20
  -1 -12  -4   69.39    5.20
   1 -12   4   57.19    5.80
   1  12   5   53.39    6.20
  -1  12  -5   40.70    4.80
  -1  12  -5   40.70    5.10
  -1 -12  -5   32.10    4.20
   1 -12   5   40.90    5.00
  -1  12  -6   24.00    4.20
  -1  12  -6   23.90    4.20
   1  12   6   18.80    4.20
  -1 -12  -6   24.30    3.60
   1 -12   6   22.30    4.30
   1  12   7   20.00    4.40
  -1  12  -7   26.90    4.60
  -1  12  -7   24.70    4.10
  -1 -12  -7   19.90    3.70
   1 -12   7   24.60    4.50
  -1 -12  -7   21.70    5.00
  -1  12  -8   17.50    4.40
   1  12   8   20.70    4.60
  -1  12  -8   17.30    4.10
   1 -12   8   19.70    4.70
  -1 -12  -8   17.30    3.70
  -1 -12  -8    9.40    4.70
  -1  12  -9   16.30    5.40
   1  12   9   18.20    4.90
  -1  12  -9   12.60    4.50
  -1 -12  -9   15.90    5.10
   1 -12   9   16.10    4.70
   1  12  10   19.70    5.30
  -1  12 -10   33.60    5.50
   1 -12  10   28.30    5.40
  -1 -12 -10   24.70    6.00
   1  13  -8   24.50    5.70
  -1  13   8   32.20    5.90
  -1 -13   8   30.90    5.40
   1 -13  -8   54.89    6.90
   1  13  -7   -0.60    3.90
  -1  13   7    0.30    4.40
  -1 -13   7    5.70    4.30
   1 -13  -7    3.40    3.70
   1  13  -6    7.00    4.10
  -1  13   6    1.10    4.10
   1 -13  -6    1.70    3.50
  -1 -13   6    8.10    4.00
  -1  13   5    0.30    3.90
   1  13  -5    2.30    3.90
   1 -13  -5   -0.40    3.40
  -1 -13   5   -2.40    3.50
  -1  13   4    3.80    3.90
   1  13  -4   -1.20    3.70
   1 -13  -4   11.10    3.60
  -1 -13   4    5.90    3.80
  -1  13   3    1.30    3.50
   1  13  -3   -0.80    3.60
   1  13  -3    2.00    3.60
   1 -13  -3    8.40    3.40
  -1 -13   3    3.50    3.50
   1  13  -2   -1.60    3.60
  -1  13   2   -4.90    3.40
   1  13  -2    2.20    3.50
  -1  13   2   -4.80    3.40
  -1 -13   2    3.90    3.50
   1 -13  -2   -1.10    3.40
   1  13  -1    2.60    3.50
   1  13  -1   -1.20    3.30
  -1  13   1    0.90    3.30
  -1  13   1   -1.40    3.50
   1 -13  -1   -2.20    3.10
  -1 -13   1    4.00    3.30
   1  13   0   -2.80    3.20
  -1  13   0   -1.10    3.30
  -1  13   0    3.00    3.40
   1  13   0    4.50    3.50
  -1 -13   0   -4.50    3.00
   1 -13   0    2.10    3.30
  -1  13  -1    5.20    3.70
   1  13   1    3.00    3.60
  -1  13  -1    2.30    3.30
   1  13   1    3.90    3.70
   1 -13   1   -3.20    3.10
  -1 -13  -1   -0.20    3.40
   1  13   2    6.50    4.00
  -1  13  -2   17.00    4.40
  -1  13  -2   10.80    3.80
   1  13   2    9.90    4.10
   1 -13   2    8.30    3.60
  -1 -13  -2   11.80    3.50
  -1  13  -3    0.40    3.50
   1  13   3   -4.30    3.20
  -1  13  -3    4.10    3.70
   1 -13   3    1.10    3.80
  -1 -13  -3   -1.20    3.20
  -1  13  -4    5.60    3.80
  -1  13  -4    7.00    3.90
   1  13   4   11.00    4.20
   1 -13   4    4.70    3.80
  -1 -13  -4    0.90    3.40
  -1  13  -5   16.90    4.70
  -1  13  -5   17.30    4.40
   1  13   5   12.20    4.30
  -1 -13  -5   20.50    4.10
   1 -13   5   21.00    4.50
  -1  13  -6    6.20    4.20
   1  13   6    5.50    4.30
  -1  13  -6    4.70    4.30
   1 -13   6    7.90    4.30
  -1 -13  -6    4.20    3.70
   1  13   7    0.10    4.10
  -1  13  -7   -0.60    4.40
  -1  13  -7    0.50    4.10
   1 -13   7    2.40    4.20
  -1 -13  -7   -0.40    3.70
  -1  13  -8   35.70    5.90
   1  13   8   34.70    6.00
  -1  13  -8   35.50    5.50
   1 -13   8   44.30    6.00
   1  14  -5   41.10    6.30
  -1  14   5   36.70    6.00
   1  14  -5   33.30    5.50
  -1 -14   5   32.60    5.60
   1 -14  -5   37.20    5.20
   1  14  -4   71.19    7.60
  -1  14   4   83.49    8.70
   1  14  -4   68.79    7.90
   1 -14  -4   82.39    7.60
  -1 -14   4   69.49    7.50
   1  14  -3    5.50    4.30
   1  14  -3    4.50    4.40
  -1  14   3   -1.20    4.20
  -1  14   3    7.30    4.40
  -1 -14   3    9.70    4.60
   1 -14  -3   12.40    4.20
  -1  14   2   65.89    8.00
  -1  14   2   69.39    8.30
   1  14  -2   50.29    6.00
   1  14  -2   75.39    8.40
   1 -14  -2   77.99    7.00
  -1 -14   2   63.49    7.10
  -1  14   1   21.90    5.50
  -1  14   1   27.40    5.50
   1  14  -1   30.70    5.50
   1  14  -1   22.30    4.90
   1 -14  -1   23.90    5.00
  -1 -14   1   31.20    5.10
  -1  14   0  118.79    9.00
  -1  14   0   99.09    8.60
   1  14   0  110.89    8.40
   1  14   0   96.89    7.90
  -1 -14   0  113.69    8.50
   1 -14   0   98.79    8.50
  -1  14  -1   17.70    4.60
   1  14   1   24.30    5.20
   1  14   1   14.70    4.70
  -1  14  -1   16.20    4.70
   1 -14   1   18.60    5.00
  -1 -14  -1   15.50    4.30
   1  14   2   54.19    6.70
   1  14   2   68.49    7.70
  -1  14  -2   61.99    7.90
  -1  14  -2   65.19    7.60
   1 -14   2   59.69    6.70
  -1 -14  -2   70.29    7.50
  -1  14  -3   -4.90    4.30
   1  14   3    4.70    4.50
   1  14   3    0.40    4.40
  -1  14  -3    1.00    4.30
   1 -14   3    1.00    4.30
  -1 -14  -3   12.20    4.40
  -1  14  -4   40.70    5.70
   1  14   4   33.80    5.90
  -1  14  -4   38.00    5.90
   1 -14   4   36.50    6.00
  -1 -14  -4   38.30    5.60
  -1  14  -5    6.30    4.80
  -1  14  -5   13.10    4.80
   1  14   5   12.70    5.20
  -1 -14  -5    5.90    4.50
   1 -14   5   18.30    5.10
  -2   0  19   -5.40    4.10
   2   0 -19   -2.50    4.60
  -2   0  19    9.00    3.90
   2   0 -18  194.88   10.50
  -2   0  18  196.88    9.00
  -2   0  18  213.08   10.20
   2   0 -17    1.90    3.50
  -2   0  17   -1.60    2.50
  -2   0  17    0.90    3.10
   2   0 -16   86.29    6.50
  -2   0  16   84.79    6.30
   2   0 -15   -1.00    2.50
  -2   0  15    2.40    2.40
   2   0 -14  698.33   20.60
   2   0 -14  674.43   16.40
  -2   0  14  697.93   20.20
   2   0 -14  673.43   16.40
   2   0 -13   -0.20    0.80
   2   0 -13   -1.70    2.10
  -2   0  13    1.10    1.90
   2   0 -12 1277.17   32.60
   2   0 -12 1208.98   29.40
  -2   0  12 1206.28   31.90
   2   0 -12 1201.08   29.30
  -2   0  11    0.00    1.40
   2   0 -11   -1.40    1.50
  -2   0  11    2.30    1.70
   2   0 -11   -0.80    0.70
   2   0 -11   -0.60    0.80
  -2   0  10 2720.73   62.89
   2   0 -10 2570.84   61.59
   2   0 -10 2578.44   63.89
  -2   0  10 2636.44   63.59
   2   0 -10 2519.65   61.59
  -2   0   9   -2.20    1.10
   2   0  -9   -0.20    0.60
   2   0  -9   -1.10    1.10
  -2   0   9    2.00    1.20
   2   0  -8 2294.47   54.59
  -2   0   8 2352.26   54.09
  -2   0   8 2199.38   54.59
   2   0  -8 2198.58   53.29
  -2   0   8 2269.27   55.39
   2   0  -8 2190.38   54.89
  -2   0   7    0.20    0.80
   2   0  -7    1.90    1.10
  -2   0   7   -2.10    1.00
   2   0  -7   -0.50    0.90
  -2   0   7    0.10    0.90
   2   0  -6 4156.28  103.59
   2   0  -6 4499.15  103.49
  -2   0   6 4383.76  102.99
  -2   0   6 4260.87  103.39
  -2   0   6 4529.75  103.59
  -2   0   5   -3.90    0.50
   2   0  -5   -3.60    0.60
   2   0  -5   -2.50    0.40
  -2   0   5   -2.70    0.60
   2   0  -5   -4.00    0.60
  -2   0   5   -3.80    0.70
   2   0  -4 5438.46  136.59
   2   0  -4 5416.46  137.29
  -2   0   4 5566.74  136.89
  -2   0   4 5242.08  136.69
   2   0  -3   -5.00    0.40
  -2   0   3   -3.90    0.30
   2   0  -3   -4.50    0.30
  -2   0   3   -4.70    0.40
  -2   0   3   -5.00    0.40
   2   0  -2 1157.38   27.90
  -2   0   2 1169.28   27.90
  -2   0   2 1147.59   27.90
   2   0  -2 1190.18   27.80
   2   0  -2 1168.18   27.90
   2   0  -1    0.30    0.10
   2   0  -1    0.70    0.20
   2   0  -1    0.80    0.20
   2   0  -1   -0.10    0.20
  -2   0   1    0.50    0.20
   2   0   0 6301.77  154.18
   2   0   0 6697.33  154.38
  -2   0  -1   -5.80    0.20
   2   0   1   -5.70    0.30
   2   0   1   -6.50    0.30
  -2   0  -1   -6.50    0.20
   2   0   1   -6.50    0.20
  -2   0  -1   -6.70    0.30
   2   0   2 5687.63  140.09
   2   0   2 5824.92  140.09
  -2   0  -2 5720.73  139.49
   2   0   3   -1.60    0.50
  -2   0  -3   -0.40    0.50
  -2   0  -3   -2.30    0.50
   2   0   3   -1.40    0.50
   2   0   3   -1.80    0.50
  -2   0  -3   -1.60    0.50
   2   0   4 5523.25  140.69
  -2   0  -4 5579.64  139.99
   2   0   4 5596.34  140.89
   2   0   5    0.20    0.40
   2   0   5   -0.20    0.80
   2   0   5    1.00    0.80
  -2   0  -5    0.40    0.80
  -2   0  -5   -2.00    0.70
  -2   0  -5   -0.20    0.30
   2   0   5   -0.50    0.70
  -2   0  -5   -0.10    0.70
  -2   0  -6 1089.69   26.30
  -2   0  -6 1052.09   26.30
  -2   0  -6  967.00   26.90
   2   0   6 1105.29   26.30
  -2   0  -6 1024.90   25.00
   2   0   6 1075.29   26.30
   2   0   6 1077.49   26.40
   2   0   6 1026.30   25.00
   2   0   7   -0.20    1.10
   2   0   7    0.50    0.40
  -2   0  -7    0.40    1.20
  -2   0  -7    0.00    1.00
  -2   0  -7    0.70    0.50
  -2   0  -7    1.20    1.10
   2   0   7    0.40    1.10
   2   0   8 1731.93   42.30
  -2   0  -8 1800.22   44.20
   2   0   8 1839.32   44.10
  -2   0  -8 1773.92   42.40
   2   0   8 1819.82   44.40
  -2   0  -8 1823.22   44.40
   2   0   8 1778.32   44.20
  -2   0  -9    0.90    0.50
   2   0   9   -0.80    0.40
   2   0   9   -0.80    1.20
  -2   0  -9   -0.40    1.40
  -2   0  -9    0.70    1.20
   2   0   9    4.90    1.90
  -2   0 -10  858.51   20.50
   2   0  10  888.01   23.30
  -2   0 -10  874.61   23.00
  -2   0 -10  827.82   23.10
  -2   0 -11    3.20    1.70
   2   0  11    0.20    1.60
  -2   0 -11    2.50    1.80
  -2   0 -12  465.45   14.50
   2   0  12  482.85   14.90
  -2   0 -12  502.55   15.10
  -2   0 -13    4.40    2.40
  -2   0 -13    0.40    2.20
   2   0  13    3.10    2.20
  -2   0 -14  154.78    7.40
  -2   0 -14  167.98    8.10
   2   0  14  157.28    7.70
   2   0  15    2.30    2.60
  -2   0 -15    0.80    2.70
  -2   0 -16   45.10    5.70
   2   0  16   58.99    5.70
  -2   0 -17    1.30    3.90
   2   0  17    3.80    3.50
   2   0  18   35.70    5.50
  -2   0 -18   52.99    6.60
   2   1 -19    0.40    4.50
  -2   1  19    0.10    3.70
  -2   1  19   -3.40    3.90
  -2  -1  19    2.50    4.00
   2  -1 -19    6.00    5.00
   2   1 -18   10.10    4.50
  -2   1  18   10.20    3.80
  -2  -1  18    8.60    3.40
   2  -1 -18   12.00    4.50
  -2  -1  18   -0.10    3.20
  -2   1  17   -1.50    2.70
  -2   1  17    1.80    3.00
   2   1 -17    1.30    3.60
  -2  -1  17    6.70    3.20
   2  -1 -17   -5.60    3.40
  -2   1  16   24.40    3.40
   2   1 -16   31.50    4.50
  -2   1  16   21.30    3.60
   2  -1 -16   22.70    4.30
  -2  -1  16   23.00    3.80
   2   1 -15    8.50    3.00
   2   1 -15    6.70    1.40
  -2   1  15    5.00    2.70
  -2   1  15    3.40    2.10
  -2  -1  15    4.50    2.50
   2  -1 -15    5.10    2.80
   2   1 -14   80.59    5.60
  -2   1  14   74.09    5.10
   2   1 -14   83.09    3.30
  -2  -1  14   76.19    5.30
   2  -1 -14   92.79    5.80
   2   1 -13   76.49    5.10
   2   1 -13   68.89    3.20
  -2   1  13   71.99    4.70
   2  -1 -13   70.99    5.30
  -2  -1  13   66.19    4.60
   2   1 -12   33.80    2.30
  -2   1  12   29.20    3.20
   2   1 -12   28.30    3.30
  -2  -1  12   24.80    3.10
   2  -1 -12   23.80    3.20
  -2  -1  12   26.50    3.20
   2   1 -11    9.20    2.20
   2   1 -11    7.90    1.70
  -2   1  11    6.10    1.90
   2   1 -11    7.80    1.30
  -2  -1  11    5.10    1.80
  -2  -1  11    5.90    1.90
   2  -1 -11    8.00    0.80
   2  -1 -11    7.30    0.80
   2  -1 -11    4.50    1.90
  -2   1  10   -0.80    1.30
  -2   1  10    2.50    1.60
   2   1 -10    0.60    1.10
   2   1 -10    0.40    0.90
   2   1 -10   -0.20    1.40
   2  -1 -10   -0.50    0.50
  -2  -1  10   -0.90    1.20
  -2  -1  10   -2.20    1.10
   2  -1 -10    1.20    0.50
   2  -1 -10   -0.10    1.40
  -2   1   9    3.50    1.30
  -2   1   9    6.10    1.50
   2   1  -9    1.70    1.00
   2   1  -9    4.50    1.00
   2   1  -9    2.10    1.30
  -2  -1   9    2.70    1.20
   2  -1  -9    2.40    1.30
  -2  -1   9    2.40    0.80
  -2  -1   9    3.00    1.20
   2  -1  -9    2.90    0.60
   2  -1  -9    2.30    0.50
  -2   1   8   15.80    1.80
  -2   1   8   11.80    1.60
   2   1  -8   14.60    1.90
   2   1  -8   12.10    1.40
  -2   1   8   13.20    2.10
   2   1  -8   11.20    1.40
   2   1  -8   11.70    1.70
  -2  -1   8   14.20    1.80
  -2  -1   8   12.30    1.50
   2  -1  -8   12.80    0.90
   2  -1  -8   11.40    1.80
   2  -1  -8   13.60    0.90
  -2  -1   8   12.10    1.20
   2  -1  -8   14.60    1.90
  -2  -1   8    9.80    1.70
  -2   1   7   90.39    3.70
   2   1  -7   94.99    3.10
  -2   1   7   92.29    3.90
  -2   1   7   91.09    3.50
   2   1  -7   88.19    3.20
   2   1  -7   95.59    4.00
   2   1  -7   89.89    3.80
   2  -1  -7   91.69    2.70
  -2  -1   7   83.29    3.00
   2  -1  -7   90.49    2.70
  -2  -1   7   93.99    3.90
   2  -1  -7   89.59    3.70
  -2  -1   7   87.59    3.70
  -2  -1   7   95.09    3.20
   2  -1  -7   92.39    4.00
  -2   1   6    2.90    0.90
   2   1  -6    1.90    0.60
   2   1  -6    3.00    0.70
  -2   1   6    5.70    1.10
  -2   1   6    5.10    1.20
   2   1  -6    4.70    1.10
   2   1  -6    3.10    1.00
  -2  -1   6    5.30    0.80
  -2  -1   6    2.60    1.00
  -2  -1   6    2.60    0.70
  -2  -1   6    2.30    0.90
   2  -1  -6    1.70    1.00
   2  -1  -6    3.60    1.10
   2  -1  -6    2.40    0.50
   2  -1  -6    2.40    0.50
   2   1  -5   71.19    2.40
  -2   1   5   67.99    2.70
  -2   1   5   71.29    2.90
   2   1  -5   68.79    2.90
   2   1  -5   71.29    2.80
  -2   1   5   70.19    2.70
   2   1  -5   66.19    2.30
  -2   1   5   70.99    2.60
   2  -1  -5   70.79    2.10
  -2  -1   5   70.39    2.80
   2  -1  -5   72.69    2.80
  -2  -1   5   71.59    2.30
  -2  -1   5   70.09    2.90
   2  -1  -5   70.59    3.00
  -2  -1   5   70.19    2.40
  -2   1   4    0.40    0.50
   2   1  -4    0.70    0.40
   2   1  -4   -0.30    0.60
  -2   1   4    0.10    0.50
  -2   1   4    1.20    0.40
   2   1  -4    0.00    0.60
  -2   1   4    0.70    0.70
   2  -1  -4    0.40    0.30
   2  -1  -4    1.00    0.70
  -2  -1   4    0.90    0.40
  -2  -1   4    0.30    0.40
   2  -1  -4    0.90    0.60
  -2  -1   4    1.00    0.70
  -2  -1   4   -0.40    0.50
   2   1  -3    3.70    0.80
  -2   1   3    4.00    0.70
   2   1  -3    2.00    0.70
  -2   1   3    2.50    0.60
   2   1  -3    3.40    0.40
  -2   1   3    3.10    0.80
   2   1  -3    3.60    0.70
  -2  -1   3    5.80    0.80
   2  -1  -3    4.40    0.80
  -2  -1   3    2.80    0.60
   2  -1  -3    3.70    0.80
   2  -1  -3    3.50    0.70
  -2  -1   3    4.80    0.80
   2  -1  -3    2.30    0.50
  -2  -1   3    3.70    0.40
  -2   1   2  187.98    4.90
  -2   1   2  184.28    4.80
  -2   1   2  191.38    5.10
  -2   1   2  185.28    5.00
   2   1  -2  197.08    5.00
   2   1  -2  186.78    5.10
   2   1  -2  187.48    4.90
   2  -1  -2  186.48    5.00
  -2  -1   2  187.18    4.90
   2  -1  -2  186.28    4.80
   2  -1  -2  184.78    5.00
  -2  -1   2  184.28    5.00
   2  -1  -2  188.88    4.90
  -2  -1   2  191.28    5.00
  -2   1   1   34.50    1.20
   2   1  -1   37.00    1.30
   2   1  -1   33.00    1.30
  -2   1   1   34.60    1.30
   2   1  -1   34.30    1.10
  -2   1   1   35.10    1.30
   2   1  -1   35.50    1.20
  -2   1   1   37.80    1.40
   2  -1  -1   36.20    1.20
   2  -1  -1   36.50    1.30
  -2  -1   1   34.80    1.30
   2  -1  -1   35.10    1.30
  -2  -1   1   34.10    1.30
  -2  -1   1   35.50    1.20
   2  -1  -1   36.60    1.30
   2   1   0 1261.77   29.80
   2   1   0 1256.37   29.90
  -2   1   0 1300.27   29.90
   2   1   0 1235.28   29.80
   2   1   0 1267.37   29.80
  -2   1   0 1258.27   30.00
  -2  -1   0 1242.28   29.80
  -2  -1   0 1235.38   29.80
   2  -1   0 1272.97   29.70
   2  -1   0 1257.77   29.90
   2  -1   0 1284.67   30.00
  -2  -1   0 1237.68   29.90
   2   1   1  129.69    3.60
   2   1   1  126.99    3.40
  -2   1  -1  129.19    3.40
  -2   1  -1  133.29    3.60
  -2   1  -1  128.19    3.70
   2   1   1  129.89    3.70
   2  -1   1  128.29    3.40
  -2  -1  -1  123.99    3.60
   2  -1   1  127.09    3.50
  -2  -1  -1  124.49    3.70
   2  -1   1  139.99    3.70
   2  -1   1  131.29    3.60
  -2   1  -2   71.69    2.40
   2   1   2   72.39    2.40
  -2   1  -2   70.69    2.40
  -2   1  -2   74.19    2.30
   2   1   2   74.79    2.60
  -2   1  -2   73.09    2.30
   2   1   2   73.99    2.00
   2   1   2   70.79    2.40
   2   1   2   73.99    2.00
  -2  -1  -2   70.29    2.40
   2  -1   2   75.39    2.30
   2  -1   2   69.49    2.40
   2  -1   2   74.49    2.30
  -2  -1  -2   72.09    2.50
   2   1   3  561.34   13.70
   2   1   3  596.94   14.60
  -2   1  -3  584.44   14.50
   2   1   3  550.54   13.70
   2   1   3  582.44   14.50
   2   1   3  594.34   14.60
  -2   1  -3  597.74   14.40
  -2   1  -3  570.34   14.20
  -2   1  -3  565.84   14.50
   2  -1   3  601.94   14.50
   2  -1   3  545.55   14.40
  -2  -1  -3  616.54   14.50
  -2  -1  -3  593.54   14.70
  -2  -1  -3  560.04   14.50
   2  -1   3  561.34   14.20
  -2   1  -4   85.89    3.10
  -2   1  -4   85.79    3.10
   2   1   4   82.29    3.10
   2   1   4   89.49    3.20
   2   1   4   84.09    2.20
  -2   1  -4   79.59    2.90
  -2   1  -4   81.29    3.00
   2   1   4   83.19    2.10
   2   1   4   88.29    3.20
   2  -1   4   84.29    2.70
   2  -1   4   82.99    3.10
   2  -1   4   88.59    3.00
  -2  -1  -4   87.29    3.20
  -2  -1  -4   82.29    3.10
   2  -1   4   92.29    3.10
  -2  -1  -4   86.69    3.10
  -2   1  -5  246.88    7.00
   2   1   5  227.88    7.00
   2   1   5  241.58    7.10
  -2   1  -5  235.28    6.90
  -2   1  -5  220.18    6.60
  -2   1  -5  243.48    7.00
   2   1   5  232.98    7.00
   2  -1   5  239.48    7.00
  -2  -1  -5  242.08    7.10
  -2  -1  -5  242.88    7.10
   2  -1   5  240.48    6.90
   2  -1   5  245.58    6.90
   2  -1   5  237.08    6.30
  -2  -1  -5  256.07    7.10
  -2   1  -6    5.10    1.20
   2   1   6    5.90    1.40
  -2   1  -6    5.40    0.80
   2   1   6    7.70    1.40
   2   1   6    4.50    1.20
  -2   1  -6    6.40    1.20
  -2   1  -6    5.00    1.20
   2  -1   6    5.50    1.20
  -2  -1  -6    6.90    1.30
  -2  -1  -6    4.10    1.30
   2  -1   6    5.10    1.20
   2  -1   6    5.30    0.80
  -2  -1  -6    2.90    1.10
   2  -1   6    5.60    1.20
   2   1   7  298.47    8.70
  -2   1  -7  276.77    8.50
  -2   1  -7  281.67    7.40
   2   1   7  285.97    8.50
   2   1   7  276.67    8.50
  -2   1  -7  276.57    8.30
  -2   1  -7  268.47    8.40
  -2  -1  -7  281.27    8.60
   2  -1   7  285.37    8.60
   2  -1   7  279.37    8.40
   2  -1   7  285.17    8.30
  -2  -1  -7  279.77    8.60
   2  -1   7  272.87    7.40
  -2  -1  -7  273.57    8.40
  -2   1  -8  288.77    7.60
  -2   1  -8  269.07    8.80
   2   1   8  303.77    9.10
   2   1   8  285.17    8.90
  -2   1  -8  278.07    8.70
   2   1   8  278.17    8.70
   2  -1   8  286.17    7.50
  -2  -1  -8  286.77    9.00
  -2  -1  -8  286.37    8.90
   2  -1   8  278.37    8.60
   2  -1   8  266.67    8.80
   2  -1   8  283.57    8.80
  -2   1  -9    7.00    1.70
   2   1   9    8.30    1.70
  -2   1  -9   10.70    1.10
  -2   1  -9    8.10    1.80
   2  -1   9    7.90    1.80
   2  -1   9    7.90    1.70
   2  -1   9    8.30    1.00
  -2  -1  -9    6.60    1.70
  -2  -1  -9    9.90    1.90
  -2   1 -10    5.70    1.70
  -2   1 -10    6.70    1.90
   2   1  10    4.90    1.70
  -2   1 -10    7.80    1.20
   2  -1  10    6.20    1.00
  -2  -1 -10    4.10    1.70
  -2  -1 -10    8.50    2.10
   2  -1  10    8.20    1.90
   2   1  11  133.09    6.00
  -2   1 -11  134.09    5.80
  -2   1 -11  126.29    4.20
  -2   1 -11  128.59    6.00
  -2  -1 -11  125.09    6.20
   2  -1  11  133.59    6.10
  -2  -1 -11  137.59    6.10
   2  -1  11  134.79    4.10
  -2   1 -12    4.50    1.10
   2   1  12    0.90    1.80
  -2   1 -12    3.30    1.90
  -2   1 -12    5.20    2.20
  -2  -1 -12    6.90    2.30
  -2  -1 -12    1.90    2.20
   2  -1  12    5.80    2.20
   2  -1  12    4.90    1.00
  -2   1 -13   60.79    4.40
  -2   1 -13   56.69    4.60
   2   1  13   51.69    4.60
  -2  -1 -13   57.39    5.00
   2  -1  13   60.89    4.70
   2   1  14   57.59    5.00
  -2   1 -14   50.09    4.90
  -2   1 -14   50.39    4.80
  -2  -1 -14   51.59    5.00
   2  -1  14   48.90    4.70
  -2   1 -15   45.40    5.40
   2   1  15   29.10    4.30
  -2   1 -15   35.50    4.40
  -2  -1 -15   32.80    4.30
   2  -1  15   35.00    4.40
   2   1  16    1.50    3.00
  -2   1 -16   -1.00    3.30
   2  -1  16   -0.50    3.00
  -2  -1 -16    9.40    3.80
   2   1  17   51.99    5.70
  -2   1 -17   55.09    6.30
  -2  -1 -17   39.90    5.50
   2  -1  17   63.79    6.50
  -2   1 -18   10.30    5.20
   2   1  18   21.70    4.80
  -2  -1 -18   11.50    5.20
   2  -1  18   14.20    4.60
  -2   2  19   31.10    4.90
  -2   2  19   31.90    5.20
   2   2 -19   26.90    5.60
  -2  -2  19   34.50    5.40
   2  -2 -19   23.90    6.00
   2   2 -18   11.50    4.50
  -2   2  18   23.40    4.40
  -2   2  18   16.00    3.90
   2  -2 -18   26.40    5.30
  -2  -2  18   21.10    4.40
   2   2 -17  260.97   11.70
  -2   2  17  240.78   10.50
  -2   2  17  242.78   10.00
   2  -2 -17  237.68   11.20
  -2  -2  17  231.38   10.50
   2   2 -16  108.19    7.10
  -2   2  16  108.49    6.70
  -2   2  16  114.19    6.20
  -2  -2  16  105.89    6.70
   2  -2 -16  104.19    7.30
   2   2 -15  516.15   17.00
  -2   2  15  492.45   16.20
  -2   2  15  513.25   15.70
   2  -2 -15  533.45   17.30
  -2  -2  15  512.15   16.40
  -2   2  14   47.80    4.30
  -2   2  14   43.60    4.20
   2   2 -14   43.00    4.60
   2  -2 -14   41.90    5.00
  -2  -2  14   48.20    4.40
  -2   2  13  654.43   18.40
  -2   2  13  649.83   18.80
   2   2 -13  657.03   19.40
   2   2 -13  633.94   17.80
   2   2 -13  650.93   17.00
  -2  -2  13  659.23   19.00
   2  -2 -13  661.63   19.60
   2   2 -12  201.18    8.30
   2   2 -12  207.48    7.10
  -2   2  12  212.18    7.90
   2   2 -12  202.18    6.60
  -2   2  12  201.58    7.40
  -2  -2  12  195.78    7.00
   2  -2 -12  204.18    8.30
  -2  -2  12  211.18    6.50
  -2  -2  12  211.88    8.00
  -2   2  11  959.20   25.00
   2   2 -11  985.30   24.00
   2   2 -11 1006.00   26.00
  -2   2  11  978.40   25.40
   2   2 -11  944.61   24.40
  -2  -2  11  955.90   24.30
  -2  -2  11  928.81   24.00
  -2  -2  11  942.41   25.40
   2  -2 -11  928.31   25.90
  -2   2  10  545.25   15.20
   2   2 -10  520.55   15.50
  -2   2  10  525.05   14.80
   2   2 -10  536.25   14.10
   2   2 -10  518.35   14.40
  -2  -2  10  553.34   14.30
  -2  -2  10  563.64   15.40
   2  -2 -10  533.65   15.70
  -2   2   9 1956.10   47.40
   2   2  -9 1987.90   46.60
  -2   2   9 1957.90   47.40
   2   2  -9 1894.31   46.70
   2   2  -9 1928.31   48.00
  -2   2   9 1929.91   47.50
   2  -2  -9 1952.20   48.10
   2  -2  -9 1909.71   45.40
   2  -2  -9 1831.62   45.40
  -2  -2   9 1946.21   47.70
  -2  -2   9 2044.50   46.70
  -2  -2   9 1873.01   46.50
  -2   2   8  830.92   21.50
   2   2  -8  835.12   21.60
  -2   2   8  832.92   21.60
   2   2  -8  813.72   21.90
   2   2  -8  847.72   20.90
  -2   2   8  804.52   21.90
   2   2  -8  819.92   20.80
  -2   2   8  869.91   21.60
  -2  -2   8  839.42   21.80
  -2  -2   8  823.12   20.80
  -2  -2   8  882.01   20.80
   2  -2  -8  851.21   21.60
   2  -2  -8  806.52   20.00
   2  -2  -8  837.32   22.10
  -2  -2   8  851.21   21.70
   2  -2  -8  842.92   20.00
   2   2  -7 3205.58   73.79
  -2   2   7 2708.83   73.99
  -2   2   7 3223.68   73.69
   2   2  -7 3099.19   72.99
  -2   2   7 3031.40   73.49
  -2   2   7 3265.17   74.19
   2   2  -7 3025.10   72.89
   2   2  -7 3110.59   73.99
   2  -2  -7 3139.79   73.59
  -2  -2   7 2993.60   72.99
  -2  -2   7 3131.59   72.79
  -2  -2   7 2957.40   73.59
   2  -2  -7 2969.20   73.99
  -2  -2   7 3215.88   73.89
  -2   2   6  749.23   19.20
  -2   2   6  737.03   18.70
   2   2  -6  742.63   18.40
  -2   2   6  744.33   17.80
   2   2  -6  759.22   18.80
  -2   2   6  764.42   18.80
   2   2  -6  725.43   18.10
   2   2  -6  686.53   19.80
  -2   2   6  721.43   18.70
   2  -2  -6  751.72   18.70
   2  -2  -6  706.43   17.70
  -2  -2   6  737.83   18.80
   2  -2  -6  716.83   19.30
  -2  -2   6  744.93   18.00
  -2  -2   6  774.92   19.00
  -2  -2   6  722.73   18.30
  -2   2   5 2343.07   56.79
  -2   2   5 2391.86   56.19
  -2   2   5 2376.66   56.99
   2   2  -5 2417.56   57.29
   2   2  -5 2376.56   56.99
   2   2  -5 2425.56   56.79
  -2   2   5 2519.85   57.39
   2  -2  -5 2409.76   56.79
   2  -2  -5 2395.36   57.39
  -2  -2   5 2371.16   56.29
  -2  -2   5 2482.35   57.19
  -2  -2   5 2300.47   56.69
  -2  -2   5 2305.47   56.99
   2  -2  -5 2270.97   56.19
   2   2  -4   42.50    1.90
   2   2  -4   44.10    1.90
  -2   2   4   32.90    1.80
  -2   2   4   36.10    1.50
  -2   2   4   35.90    2.00
   2   2  -4   33.90    1.30
   2   2  -4   34.00    1.90
   2  -2  -4   37.80    1.50
  -2  -2   4   35.30    1.30
   2  -2  -4   39.00    1.80
  -2  -2   4   38.60    1.80
   2  -2  -4   35.80    2.00
  -2  -2   4   32.90    1.70
  -2  -2   4   36.10    2.00
   2   2  -3 9261.37  235.88
  -2   2   3 9811.52  237.48
   2   2  -3 9831.02  236.08
  -2   2   3 9649.43  236.08
   2  -2  -3 9731.33  237.08
   2  -2  -3 9999.00  236.18
  -2  -2   3 9745.92  235.48
   2   2  -2 4550.24  113.39
  -2   2   2 4623.84  115.19
   2   2  -2 4440.26  113.49
  -2   2   2 4628.04  116.09
  -2  -2   2 4355.36  112.89
   2  -2  -2 4412.06  115.39
   2  -2  -2 4615.34  114.89
  -2  -2   2 5015.20  113.29
  -2   2   1 2571.34   58.59
   2  -2  -1 2372.56   58.89
   2   2   0 1291.27   31.40
  -2   2   0 1361.36   31.50
   2   2   0 1354.36   31.30
  -2   2   0 1260.97   31.90
   2   2   0 1318.67   31.50
  -2   2   0 1323.37   31.70
  -2  -2   0 1329.67   31.50
  -2  -2   0 1313.77   31.70
   2  -2   0 1316.67   31.60
   2   2   1 4522.75  112.89
   2   2   1 4490.25  112.79
  -2   2  -1 5069.39  121.29
   2  -2   1 4843.12  120.29
   2  -2   1 5014.30  121.29
   2   2   2 1379.06   32.70
  -2   2  -2 1378.06   32.80
  -2   2  -2 1333.37   32.90
   2   2   2 1419.86   33.10
   2   2   2 1405.86   33.10
   2   2   2 1342.37   32.40
  -2   2  -2 1350.16   32.70
  -2   2  -2 1403.46   32.90
   2  -2   2 1333.87   32.70
   2  -2   2 1334.27   32.90
  -2  -2  -2 1352.16   32.50
  -2  -2  -2 1341.97   33.10
   2  -2   2 1354.56   32.80
   2  -2   2 1432.06   33.00
   2   2   3 2787.62   63.69
   2   2   3 2604.54   63.29
  -2   2  -3 2662.83   63.39
  -2   2  -3 2603.74   63.29
  -2   2  -3 2706.73   63.29
  -2   2  -3 2654.83   63.29
   2   2   3 2798.72   63.69
   2  -2   3 2771.62   63.29
  -2  -2  -3 2634.54   63.69
   2  -2   3 2565.44   63.29
   2  -2   3 2725.33   63.39
  -2  -2  -3 2600.34   63.69
  -2  -2  -3 2701.53   63.29
   2  -2   3 2589.54   63.29
  -2   2  -4  839.62   20.80
   2   2   4  793.62   19.80
  -2   2  -4  809.82   20.80
  -2   2  -4  860.01   20.80
   2   2   4  866.41   21.10
   2   2   4  844.92   21.00
   2   2   4  829.42   20.70
  -2   2  -4  830.92   20.60
   2  -2   4  856.31   20.80
   2  -2   4  829.92   20.80
   2  -2   4  826.52   20.60
   2  -2   4  842.32   20.70
  -2  -2  -4  857.91   21.20
  -2  -2  -4  863.91   20.80
  -2  -2  -4  806.22   21.00
   2   2   5 2607.14   63.39
  -2   2  -5 2631.14   62.99
  -2   2  -5 2588.34   63.29
   2   2   5 2817.52   63.69
  -2   2  -5 2737.53   63.39
   2   2   5 2740.43   63.69
  -2   2  -5 2626.64   63.39
   2  -2   5 2482.15   63.29
   2  -2   5 2644.44   63.29
  -2  -2  -5 2754.62   63.39
  -2  -2  -5 2574.54   63.69
   2  -2   5 2710.33   63.29
   2  -2   5 2561.64   62.89
  -2   2  -6  597.04   15.00
  -2   2  -6  610.64   15.60
   2   2   6  595.24   15.60
   2   2   6  606.54   15.80
  -2   2  -6  554.34   15.60
   2   2   6  578.94   15.70
  -2   2  -6  575.94   15.40
  -2  -2  -6  601.24   15.50
  -2  -2  -6  569.74   15.80
   2  -2   6  597.04   15.50
  -2  -2  -6  600.64   15.90
   2  -2   6  600.84   15.60
   2  -2   6  585.24   14.90
   2  -2   6  594.04   15.40
  -2   2  -7 2204.78   53.89
  -2   2  -7 2270.77   53.79
   2   2   7 2096.39   53.69
   2   2   7 2349.36   54.09
  -2   2  -7 2201.48   52.99
   2   2   7 2173.88   54.09
  -2   2  -7 2194.68   53.69
   2  -2   7 2131.49   53.79
  -2  -2  -7 2208.58   54.09
   2  -2   7 2336.37   53.89
   2  -2   7 2287.57   53.59
   2  -2   7 2132.29   52.99
  -2  -2  -7 2279.07   53.79
  -2  -2  -7 2201.28   54.19
  -2   2  -8  243.38    7.80
   2   2   8  249.28    8.00
   2   2   8  238.68    8.20
  -2   2  -8  250.47    7.10
  -2   2  -8  234.98    7.90
  -2  -2  -8  247.28    8.20
   2  -2   8  248.98    7.70
  -2  -2  -8  245.68    8.30
   2  -2   8  249.58    8.00
   2  -2   8  247.08    7.00
   2  -2   8  248.68    8.10
  -2   2  -9  852.81   21.30
   2   2   9  830.32   22.50
  -2   2  -9  836.12   22.30
  -2   2  -9  904.61   22.90
   2  -2   9  889.71   22.80
   2  -2   9  853.81   21.30
   2  -2   9  844.82   22.10
  -2  -2  -9  821.22   22.80
  -2   2 -10  122.19    5.60
   2   2  10  122.69    5.50
  -2   2 -10  116.49    4.30
  -2   2 -10  119.09    5.10
   2  -2  10  112.79    5.30
   2  -2  10  120.69    4.20
  -2  -2 -10  111.39    5.50
   2   2  11  520.05   15.40
  -2   2 -11  530.15   13.80
  -2   2 -11  533.15   15.70
  -2   2 -11  516.05   15.10
  -2  -2 -11  506.95   15.70
   2  -2  11  528.15   15.60
   2  -2  11  526.35   13.60
   2   2  12  119.89    6.00
  -2   2 -12  111.09    4.50
  -2   2 -12  110.19    5.80
  -2   2 -12  121.99    5.60
   2  -2  12  121.79    4.50
   2  -2  12  122.09    6.10
  -2  -2 -12  122.89    6.50
  -2   2 -13  167.78    7.60
   2   2  13  163.58    7.50
  -2   2 -13  161.58    7.10
   2  -2  13  159.58    7.60
  -2  -2 -13  156.48    7.50
   2  -2  13  151.78    5.50
  -2   2 -14   36.40    4.60
  -2   2 -14   40.10    4.60
   2   2  14   36.40    4.50
   2  -2  14   43.60    5.00
  -2  -2 -14   38.40    4.60
   2  -2  14   30.40    2.50
  -2   2 -15  137.99    7.50
   2   2  15  155.08    7.90
  -2   2 -15  165.18    8.50
   2  -2  15  146.39    7.80
  -2   2 -16   21.80    4.00
   2   2  16   17.10    3.80
  -2   2 -16   21.50    4.30
  -2  -2 -16   23.80    4.30
   2  -2  16   19.60    3.90
   2   2  17    2.40    3.60
  -2   2 -17   -2.20    4.00
  -2   2 -17    1.10    3.80
  -2  -2 -17    4.70    4.20
   2  -2  17    4.90    3.80
   2   2  18    2.20    4.20
  -2   2 -18    4.10    4.90
   2   2  18   -2.80    3.90
  -2  -2 -18    1.10    4.40
   2  -2  18   -0.40    4.20
  -2   3  19    4.40    4.00
   2   3 -19    2.40    5.10
  -2   3  19   11.90    4.70
  -2  -3  19    3.30    4.30
   2  -3 -19    0.10    4.70
   2   3 -18   14.70    4.70
  -2   3  18    7.00    3.70
  -2   3  18   11.30    3.80
  -2  -3  18   15.20    4.30
   2  -3 -18   19.30    4.90
   2   3 -17   20.70    4.40
  -2   3  17   15.60    3.80
  -2   3  17   19.90    4.20
   2  -3 -17   16.00    4.30
  -2  -3  17   15.90    3.80
   2   3 -16   14.70    3.70
  -2   3  16   10.90    3.40
  -2   3  16   13.60    3.30
  -2  -3  16    7.20    3.30
   2  -3 -16    9.80    3.60
  -2   3  15   -0.60    2.20
   2   3 -15    4.10    2.80
  -2   3  15    6.00    2.80
  -2  -3  15    4.20    2.60
  -2   3  14   16.10    2.90
  -2   3  14   12.20    2.90
   2   3 -14   16.90    2.70
   2   3 -14    9.80    3.00
   2  -3 -14   16.30    3.30
  -2  -3  14   16.60    2.30
  -2  -3  14   13.60    3.00
   2   3 -13    2.00    2.10
   2   3 -13   -0.30    1.70
  -2   3  13    1.40    2.00
   2   3 -13   -1.50    2.20
  -2   3  13   -2.10    1.80
  -2  -3  13    1.60    2.10
   2  -3 -13    0.30    2.20
  -2  -3  13   -0.90    1.40
   2   3 -12   45.50    3.50
   2   3 -12   46.10    3.20
   2   3 -12   45.20    4.00
  -2   3  12   49.40    3.60
  -2   3  12   47.90    3.70
  -2  -3  12   43.60    3.70
  -2  -3  12   45.50    3.00
  -2  -3  12   45.20    3.40
   2  -3 -12   37.90    4.00
   2   3 -11  164.98    7.10
  -2   3  11  161.78    6.40
  -2   3  11  158.68    6.40
   2   3 -11  153.08    5.70
   2   3 -11  162.98    5.80
   2  -3 -11  160.58    7.00
  -2  -3  11  162.08    6.60
  -2  -3  11  163.28    5.70
  -2  -3  11  160.68    5.60
  -2   3  10    4.10    1.50
   2   3 -10    5.20    1.50
  -2   3  10    2.70    1.50
   2   3 -10    3.50    1.80
   2  -3 -10    5.80    1.80
  -2  -3  10    3.80    1.60
  -2  -3  10    3.70    1.40
  -2  -3  10    4.80    1.30
   2   3  -9   20.20    1.90
  -2   3   9   20.40    2.30
   2   3  -9   14.60    2.30
   2   3  -9   24.60    2.30
  -2   3   9   23.00    2.30
   2  -3  -9   22.40    1.00
   2  -3  -9   26.40    2.90
  -2  -3   9   20.80    2.00
   2  -3  -9   22.20    1.00
  -2  -3   9   20.20    2.30
  -2  -3   9   21.50    2.10
   2  -3  -9   23.90    2.90
   2   3  -8    0.30    1.30
   2   3  -8   -0.30    1.20
  -2   3   8    1.40    1.40
   2   3  -8    0.40    0.80
   2   3  -8   -0.30    1.20
  -2   3   8   -0.20    1.00
  -2   3   8    0.70    1.10
  -2  -3   8    0.80    1.10
  -2  -3   8    0.60    0.90
   2  -3  -8    0.50    1.20
  -2  -3   8    1.60    1.00
  -2  -3   8    1.50    1.50
   2  -3  -8   -0.30    1.10
  -2   3   7   14.00    2.10
  -2   3   7   11.60    1.80
   2   3  -7    9.70    1.80
  -2   3   7   13.00    1.00
   2   3  -7   12.40    1.60
  -2   3   7   13.30    1.80
   2   3  -7   11.30    1.40
   2   3  -7   13.50    1.70
  -2   3   7    9.80    1.60
   2  -3  -7   13.30    1.00
  -2  -3   7   12.00    1.90
  -2  -3   7   12.60    1.40
  -2  -3   7    9.60    1.50
   2  -3  -7   12.90    1.60
   2  -3  -7   11.60    1.80
  -2  -3   7    9.10    1.60
   2   3  -6  121.69    4.20
   2   3  -6  114.99    4.20
  -2   3   6  115.09    4.30
   2   3  -6  111.99    4.50
  -2   3   6  115.19    4.00
  -2   3   6   97.39    4.00
  -2   3   6  116.89    4.60
   2   3  -6  112.99    3.60
  -2  -3   6  112.99    4.10
   2  -3  -6  111.19    4.60
  -2  -3   6  113.79    4.40
   2  -3  -6  108.79    3.40
  -2  -3   6  114.19    3.60
   2  -3  -6  119.79    4.10
  -2   3   5   -1.80    0.60
   2   3  -5   -0.80    0.50
   2   3  -5    1.20    0.90
  -2   3   5   -1.10    0.50
  -2   3   5   -0.70    0.80
  -2   3   5    0.00    1.10
   2   3  -5   -2.10    0.80
  -2  -3   5   -1.80    0.80
  -2  -3   5   -1.80    0.60
   2  -3  -5   -1.50    0.70
   2  -3  -5   -1.50    0.50
  -2  -3   5   -2.00    0.70
  -2   3   4  235.78    7.20
   2   3  -4  235.68    6.40
  -2   3   4  231.68    6.60
   2   3  -4  249.68    6.90
  -2   3   4  248.48    6.60
  -2   3   4  243.48    7.40
   2   3  -4  243.98    7.00
   2   3  -4  233.18    7.20
   2  -3  -4  230.48    6.50
   2  -3  -4  255.87    7.30
  -2  -3   4  240.18    6.80
   2  -3  -4  241.38    7.40
  -2  -3   4  243.18    7.20
  -2  -3   4  249.78    6.40
  -2  -3   4  240.08    7.00
   2  -3  -4  250.27    6.60
  -2   3   3  116.19    4.10
  -2   3   3  124.59    3.80
  -2   3   3  121.29    3.50
   2   3  -3  125.39    4.00
   2   3  -3  118.19    4.10
   2   3  -3  123.09    3.50
   2   3  -3  120.59    3.70
  -2   3   3  122.29    4.20
  -2  -3   3  124.59    4.20
   2  -3  -3  125.59    4.20
   2  -3  -3  114.29    4.20
  -2  -3   3  119.99    3.50
  -2  -3   3  120.89    4.00
   2  -3  -3  115.59    3.70
   2  -3  -3  126.49    3.50
  -2  -3   3  121.89    3.70
  -2   3   2  276.67    8.00
   2   3  -2  286.37    8.00
   2   3  -2  294.37    7.50
  -2   3   2  295.97    8.10
  -2   3   2  294.47    7.70
  -2   3   2  285.57    7.20
   2   3  -2  297.87    7.90
   2   3  -2  280.17    7.50
  -2  -3   2  283.17    7.50
   2  -3  -2  291.27    8.00
   2  -3  -2  289.07    7.70
  -2  -3   2  285.17    7.40
   2  -3  -2  286.67    8.00
   2  -3  -2  285.97    7.20
  -2  -3   2  281.27    7.90
  -2   3   1    1.40    0.30
  -2   3   1    0.50    0.70
   2   3  -1   -0.20    0.40
  -2   3   1   -0.20    0.70
  -2   3   1    0.90    0.80
   2   3  -1   -0.30    0.70
   2   3  -1   -0.50    0.60
   2   3  -1    0.90    0.60
   2  -3  -1    0.30    0.80
   2  -3  -1    0.70    0.30
   2  -3  -1   -0.80    0.60
  -2  -3   1    1.10    0.70
   2  -3  -1   -0.20    0.70
  -2  -3   1   -0.10    0.40
  -2   3   0  494.45   12.50
   2   3   0  492.05   12.70
   2   3   0  474.45   12.40
  -2   3   0  484.15   12.60
   2   3   0  481.95   11.90
  -2   3   0  491.85   12.50
   2   3   0  494.35   12.40
   2  -3   0  477.65   11.70
  -2  -3   0  495.85   12.80
   2  -3   0  474.75   12.50
  -2  -3   0  496.15   12.40
  -2  -3   0  476.25   11.90
   2  -3   0  474.95   11.70
   2  -3   0  503.35   12.60
   2  -3   0  495.85   12.60
  -2   3  -1   15.90    1.30
   2   3   1   16.40    1.00
  -2   3  -1   17.40    1.40
   2   3   1   16.90    1.50
  -2   3  -1   18.30    1.40
   2   3   1   19.90    1.20
  -2   3  -1   17.70    1.30
   2   3   1   16.70    1.30
  -2  -3  -1   14.80    1.50
   2  -3   1   18.20    0.90
   2  -3   1   14.90    1.40
  -2  -3  -1   16.80    1.20
   2  -3   1   15.50    1.30
   2   3   2   41.30    2.10
  -2   3  -2   41.80    1.60
  -2   3  -2   38.60    2.00
   2   3   2   39.20    1.70
  -2   3  -2   36.30    2.00
   2   3   2   41.40    2.30
  -2   3  -2   37.50    1.90
   2   3   2   37.90    1.60
   2   3   2   38.80    2.10
   2  -3   2   39.60    2.00
  -2  -3  -2   36.20    2.10
   2  -3   2   38.60    2.00
   2  -3   2   41.40    1.70
  -2  -3  -2   37.20    1.70
   2   3   3   -1.40    0.90
   2   3   3    1.00    0.90
   2   3   3   -0.90    0.50
  -2   3  -3   -2.00    0.60
  -2   3  -3   -0.40    0.60
  -2   3  -3   -0.10    0.70
  -2   3  -3   -0.90    0.70
   2   3   3   -1.40    0.60
  -2  -3  -3   -1.40    0.50
   2  -3   3    1.70    0.80
   2  -3   3   -1.60    0.60
   2  -3   3    0.00    0.70
   2  -3   3   -1.80    0.50
  -2  -3  -3   -2.00    0.70
  -2   3  -4  124.49    4.40
   2   3   4  130.09    4.20
  -2   3  -4  130.39    4.40
  -2   3  -4  131.89    4.30
   2   3   4  135.59    4.80
   2   3   4  134.79    3.70
   2   3   4  142.89    5.00
  -2   3  -4  127.79    4.40
   2  -3   4  140.49    4.50
  -2  -3  -4  133.69    3.70
  -2  -3  -4  136.49    4.30
   2  -3   4  133.09    4.40
   2  -3   4  131.79    4.30
  -2  -3  -4  133.39    4.80
   2  -3   4  138.19    4.50
   2   3   5    3.70    1.00
  -2   3  -5    4.70    1.20
   2   3   5    6.20    1.40
  -2   3  -5    2.50    1.00
   2   3   5    5.60    0.70
  -2   3  -5    4.60    1.10
  -2   3  -5    6.40    1.20
  -2  -3  -5    4.90    0.70
   2  -3   5    4.00    1.10
  -2  -3  -5    3.40    1.20
   2  -3   5    4.10    1.10
   2  -3   5    5.70    1.20
   2  -3   5    5.40    1.10
  -2  -3  -5    4.60    1.10
  -2   3  -6  252.07    7.50
   2   3   6  232.58    7.80
   2   3   6  235.28    7.80
  -2   3  -6  256.47    7.30
  -2   3  -6  216.78    7.80
  -2   3  -6  244.28    7.60
   2   3   6  247.98    6.00
   2   3   6  247.48    7.50
   2  -3   6  248.98    7.50
  -2  -3  -6  263.27    7.50
   2  -3   6  259.57    7.50
   2  -3   6  243.38    7.30
   2  -3   6  249.08    7.50
  -2  -3  -6  244.08    8.00
  -2   3  -7    0.60    1.40
  -2   3  -7   -0.20    1.10
   2   3   7    0.00    1.00
  -2   3  -7   -1.70    1.10
  -2   3  -7   -0.60    1.00
   2   3   7    0.10    1.50
   2   3   7   -2.10    1.50
   2  -3   7    1.20    1.20
  -2  -3  -7    2.40    1.20
   2  -3   7   -1.40    0.90
  -2  -3  -7    2.20    1.30
   2  -3   7    0.10    1.40
   2  -3   7   -1.40    1.10
   2   3   8   32.80    2.70
  -2   3  -8   32.00    2.70
  -2   3  -8   36.30    2.60
  -2   3  -8   35.10    2.50
   2  -3   8   30.00    2.30
   2  -3   8   32.70    2.70
  -2  -3  -8   33.10    3.10
   2  -3   8   36.60    3.10
   2  -3   8   35.80    2.60
  -2   3  -9   68.39    3.90
  -2   3  -9   61.09    3.60
  -2   3  -9   55.19    3.20
   2   3   9   58.69    3.60
  -2  -3  -9   60.39    4.10
   2  -3   9   60.29    3.10
   2  -3   9   58.89    3.70
   2  -3   9   60.69    3.70
   2   3  10  230.88    8.20
  -2   3 -10  231.18    8.00
  -2   3 -10  234.78    8.40
  -2   3 -10  240.28    7.40
  -2  -3 -10  230.28    8.60
   2  -3  10  239.08    7.30
   2  -3  10  227.48    8.30
  -2   3 -11    1.30    1.70
   2   3  11   -1.20    1.60
  -2   3 -11    0.70    1.60
  -2   3 -11   -1.10    1.80
   2  -3  11    1.70    1.90
  -2  -3 -11    1.00    2.10
   2  -3  11    1.30    1.30
  -2   3 -12   63.69    4.30
  -2   3 -12   70.49    4.90
  -2   3 -12   56.39    3.90
   2   3  12   63.19    4.70
   2  -3  12   66.49    3.50
   2  -3  12   65.89    4.80
  -2  -3 -12   55.99    4.90
  -2   3 -13   27.10    3.80
   2   3  13   24.20    3.40
  -2   3 -13   21.40    3.10
   2  -3  13   19.90    2.20
   2  -3  13   25.40    3.50
  -2  -3 -13   31.30    4.00
  -2   3 -14   74.39    5.50
  -2   3 -14   85.39    6.10
   2   3  14   77.09    5.60
  -2  -3 -14   79.09    6.20
   2  -3  14   75.69    4.00
   2  -3  14   74.29    5.50
  -2   3 -15   31.20    4.20
   2   3  15   25.80    4.10
  -2   3 -15   27.90    3.90
   2  -3  15   27.80    3.20
   2  -3  15   23.90    4.00
  -2  -3 -15   19.60    4.10
   2   3  16   24.10    4.10
  -2   3 -16   22.10    4.30
  -2   3 -16   24.90    4.30
   2   3  16   15.40    3.90
  -2  -3 -16   23.50    4.40
   2  -3  16   25.30    4.30
  -2   3 -17    1.70    4.60
   2   3  17    4.10    3.70
  -2   3 -17    2.30    4.40
   2   3  17   -1.90    3.70
   2  -3  17   10.50    4.30
  -2  -3 -17   -1.70    3.80
   2   3  18   21.60    5.10
  -2   3 -18   12.50    5.00
   2   3  18   25.60    4.90
  -2  -3 -18   29.60    5.70
   2  -3  18   23.30    5.50
  -2   4  19   71.29    8.00
  -2   4  19   60.69    7.00
  -2  -4  19   76.19    8.00
   2  -4 -19   65.09    7.90
  -2   4  18   38.30    5.20
   2   4 -18   44.40    6.20
  -2   4  18   31.10    5.00
  -2  -4  18   39.10    5.60
   2  -4 -18   31.60    5.80
   2   4 -17  114.39    8.30
  -2   4  17  128.39    7.90
  -2   4  17  132.79    8.20
  -2  -4  17  120.59    8.20
   2  -4 -17  123.49    9.10
  -2   4  16  113.99    7.10
  -2   4  16   99.49   10.20
   2   4 -16  115.49    7.60
  -2  -4  16  119.59    7.10
   2  -4 -16  116.19    8.10
  -2   4  15  269.67   10.30
   2   4 -15  272.87    9.40
  -2   4  15  270.37   10.40
  -2  -4  15  260.17    8.90
   2  -4 -15  263.17   11.20
  -2   4  14  170.48    7.70
  -2   4  14  187.98    8.20
   2   4 -14  180.58    7.00
   2   4 -14  188.98    8.60
  -2  -4  14  189.58    8.30
  -2  -4  14  165.78    6.60
   2  -4 -14  198.58    9.10
  -2   4  13  607.54   17.70
   2   4 -13  587.34   18.40
  -2   4  13  616.24   17.70
   2   4 -13  611.64   16.50
  -2  -4  13  598.84   17.70
  -2  -4  13  587.64   16.40
   2  -4 -13  583.94   18.50
   2   4 -12  234.28    7.70
   2   4 -12  238.18    9.30
  -2   4  12  246.58    8.90
  -2   4  12  233.18    8.60
  -2  -4  12  241.28    7.90
  -2  -4  12  246.48    8.90
  -2  -4  12  226.88    7.70
   2  -4 -12  231.98    9.40
  -2   4  11  507.65   14.70
   2   4 -11  513.75   13.80
  -2   4  11  516.75   15.10
   2   4 -11  497.75   15.40
  -2  -4  11  506.95   13.80
  -2  -4  11  501.45   14.90
   2  -4 -11  506.95   15.70
  -2  -4  11  506.75   14.10
   2   4 -10  868.21   24.30
  -2   4  10  922.91   23.60
  -2   4  10  894.61   23.90
   2   4 -10  838.32   23.20
   2  -4 -10  883.31   24.60
   2  -4 -10  943.61   21.30
  -2  -4  10  918.11   23.20
   2  -4 -10  884.71   21.20
  -2  -4  10  914.41   23.90
  -2  -4  10  915.91   22.70
  -2   4   9  719.03   17.20
   2   4  -9  717.23   18.20
  -2   4   9  727.63   19.30
   2   4  -9  710.13   19.70
  -2   4   9  711.93   18.90
   2   4  -9  696.53   18.60
  -2  -4   9  719.13   18.70
   2  -4  -9  688.83   19.80
  -2  -4   9  723.53   18.10
  -2  -4   9  692.73   19.00
   2  -4  -9  707.03   17.20
  -2   4   8  862.71   21.90
  -2   4   8  867.81   22.50
  -2   4   8  855.31   20.90
   2   4  -8  857.31   22.70
   2   4  -8  819.42   22.00
   2   4  -8  860.61   21.30
   2   4  -8  847.72   21.90
   2  -4  -8  856.41   23.00
  -2  -4   8  828.52   21.80
  -2  -4   8  871.91   21.30
   2  -4  -8  866.61   21.90
  -2  -4   8  852.41   22.10
   2  -4  -8  857.41   20.70
  -2   4   7 1016.60   26.00
   2   4  -7 1040.90   25.70
  -2   4   7 1026.70   24.60
   2   4  -7 1033.90   25.60
  -2   4   7 1052.69   27.40
   2   4  -7  989.50   26.20
   2   4  -7  993.60   24.90
  -2   4   7  999.80   25.40
  -2  -4   7 1030.60   24.90
   2  -4  -7  998.10   24.60
  -2  -4   7  983.30   25.60
  -2  -4   7  989.10   26.00
  -2  -4   7 1026.00   25.60
   2  -4  -7 1034.70   25.40
   2  -4  -7 1015.30   26.50
  -2   4   6 2286.87   55.89
   2   4  -6 2354.26   55.19
  -2   4   6 2173.08   54.69
   2   4  -6 2368.36   55.09
  -2   4   6 2261.87   55.59
   2   4  -6 2221.68   55.69
  -2   4   6 2303.17   54.39
   2   4  -6 2255.67   54.49
  -2  -4   6 2279.37   55.19
  -2  -4   6 2291.37   54.39
   2  -4  -6 2209.18   54.39
   2  -4  -6 2278.07   55.89
   2  -4  -6 2341.97   54.79
  -2  -4   6 2408.86   55.69
   2   4  -5 4481.25  105.39
  -2   4   5 4442.86  104.69
   2   4  -5 4469.05  105.79
  -2   4   5 4442.06  105.69
   2   4  -5 4411.06  104.99
  -2   4   5 4676.63  105.99
  -2  -4   5 4253.27  104.99
  -2  -4   5 4400.26  105.39
  -2  -4   5 4442.06  104.59
   2  -4  -5 4324.17  105.89
   2  -4  -5 4501.65  104.79
  -2  -4   5 4466.75  105.59
  -2   4   4  599.24   15.30
  -2   4   4  579.94   14.50
  -2   4   4  588.44   15.40
   2   4  -4  562.34   14.50
   2   4  -4  559.64   15.20
   2   4  -4  579.14   14.90
  -2   4   4  556.74   14.20
   2   4  -4  563.54   14.30
  -2  -4   4  576.04   15.10
  -2  -4   4  564.54   14.50
   2  -4  -4  552.14   15.30
   2  -4  -4  561.04   14.50
   2  -4  -4  583.24   14.20
   2  -4  -4  572.44   15.20
  -2  -4   4  591.84   14.30
  -2  -4   4  572.84   15.00
  -2   4   3 2025.70   51.99
   2   4  -3 1906.41   51.89
   2   4  -3 2285.57   51.19
  -2   4   3 2076.29   50.19
  -2   4   3 2223.38   50.79
   2   4  -3 2127.99   50.49
  -2   4   3 2261.77   51.49
   2   4  -3 2098.89   50.59
   2  -4  -3 2129.49   51.39
  -2  -4   3 2135.79   50.59
   2  -4  -3 2163.88   50.19
   2  -4  -3 2298.87   51.39
  -2  -4   3 2065.69   50.49
   2  -4  -3 2104.59   50.79
  -2  -4   3 1976.20   51.69
  -2   4   2 2916.91   71.19
  -2   4   2 3068.09   70.89
   2   4  -2 2823.02   70.29
   2   4  -2 2903.91   70.59
   2   4  -2 2927.61   71.19
  -2   4   2 3112.09   71.29
   2   4  -2 2987.90   70.99
  -2  -4   2 3004.20   70.59
   2  -4  -2 3134.79   71.19
   2  -4  -2 3032.60   70.89
  -2  -4   2 2974.10   71.09
   2  -4  -2 2903.71   71.19
   2   4  -1 1853.91   45.60
  -2   4   1 1939.71   46.10
   2   4  -1 2002.60   45.90
  -2   4   1 1933.61   45.80
   2   4  -1 1881.81   45.10
   2   4  -1 1972.90   46.20
  -2   4   1 1865.71   46.00
  -2  -4   1 1883.11   45.90
  -2  -4   1 1952.50   45.70
   2  -4  -1 1828.12   45.80
   2  -4  -1 1820.42   46.00
  -2  -4   1 1869.81   45.10
   2  -4  -1 1998.40   46.10
  -2   4   0 1524.45   36.30
  -2   4   0 1464.15   36.20
   2   4   0 1462.25   36.00
   2   4   0 1455.55   35.30
  -2   4   0 1527.65   36.20
   2   4   0 1524.95   36.00
   2   4   0 1544.75   36.50
  -2  -4   0 1431.66   35.30
   2  -4   0 1438.06   36.10
  -2  -4   0 1426.16   36.00
  -2  -4   0 1528.15   36.10
   2  -4   0 1563.54   36.30
  -2   4  -1 2252.97   52.39
   2   4   1 2126.39   52.29
  -2   4  -1 2157.28   52.39
   2   4   1 2180.88   52.09
   2   4   1 2272.57   52.69
  -2   4  -1 2254.07   52.39
   2   4   1 2180.68   51.49
  -2  -4  -1 2171.18   52.09
   2  -4   1 2121.39   52.39
   2  -4   1 2109.89   51.29
  -2  -4  -1 2116.09   52.59
   2  -4   1 2242.38   52.39
   2   4   2 1125.39   27.00
   2   4   2 1082.99   26.70
  -2   4  -2 1082.39   25.70
  -2   4  -2 1063.79   26.50
   2   4   2  976.00   26.10
   2   4   2 1109.99   26.20
  -2   4  -2 1054.49   26.50
   2   4   2 1057.59   25.80
  -2   4  -2 1165.18   26.70
   2  -4   2 1020.10   26.70
   2  -4   2 1128.89   26.60
   2  -4   2 1070.79   25.80
  -2  -4  -2 1055.59   26.10
  -2  -4  -2 1043.20   27.00
  -2   4  -3 1860.01   43.80
   2   4   3 1850.81   44.70
  -2   4  -3 1846.02   44.50
  -2   4  -3 1884.31   44.50
   2   4   3 1930.81   44.80
   2   4   3 1940.71   45.00
  -2   4  -3 1794.82   44.40
   2   4   3 1800.32   43.90
   2   4   3 1845.52   43.90
   2  -4   3 1782.42   43.90
  -2  -4  -3 1891.11   45.00
   2  -4   3 1570.34   44.90
  -2  -4  -3 1785.72   43.90
   2  -4   3 1956.30   44.50
   2   4   4 1955.70   46.40
  -2   4  -4 1874.51   47.30
  -2   4  -4 1907.21   47.10
  -2   4  -4 2005.50   47.20
   2   4   4 2081.29   47.70
   2   4   4 2016.20   47.80
   2   4   4 1889.41   46.70
  -2   4  -4 1962.30   46.70
   2   4   4 1917.21   47.50
  -2  -4  -4 1855.91   46.40
  -2  -4  -4 1915.51   47.70
   2  -4   4 1884.91   46.80
   2  -4   4 1924.81   47.20
   2  -4   4 2019.30   47.20
   2  -4   4 2049.70   47.20
  -2   4  -5 1303.37   30.90
   2   4   5 1275.67   31.80
   2   4   5 1235.88   30.80
   2   4   5 1281.57   31.70
   2   4   5 1269.37   30.20
  -2   4  -5 1299.97   31.20
   2   4   5 1253.37   31.50
  -2   4  -5 1153.58   31.60
  -2   4  -5 1201.98   31.20
   2  -4   5 1317.97   31.20
   2  -4   5 1235.68   30.90
  -2  -4  -5 1295.87   30.90
  -2  -4  -5 1220.18   31.70
   2  -4   5 1257.07   31.10
   2  -4   5 1325.47   31.30
  -2  -4  -5 1211.48   30.10
   2   4   6  625.24   17.50
  -2   4  -6  633.64   16.90
   2   4   6  644.34   16.80
   2   4   6  666.23   15.70
  -2   4  -6  678.23   16.90
   2   4   6  608.24   17.50
  -2   4  -6  643.14   16.90
  -2   4  -6  603.94   17.10
   2  -4   6  661.93   16.90
  -2  -4  -6  627.34   15.70
  -2  -4  -6  654.83   17.70
  -2  -4  -6  663.83   16.80
   2  -4   6  638.54   16.80
   2  -4   6  662.23   16.90
   2  -4   6  654.63   17.10
  -2   4  -7  860.91   21.80
   2   4   7  840.32   21.80
  -2   4  -7  839.52   21.90
  -2   4  -7  823.62   22.20
  -2   4  -7  865.81   21.90
   2   4   7  855.41   20.30
   2  -4   7  856.11   22.10
   2  -4   7  862.71   21.80
  -2  -4  -7  825.12   22.70
   2  -4   7  849.12   22.00
   2  -4   7  863.41   21.80
  -2  -4  -7  845.02   21.80
   2   4   8  994.50   25.20
  -2   4  -8  959.30   25.40
  -2   4  -8  973.20   25.00
  -2  -4  -8  987.50   26.00
   2  -4   8  971.50   24.90
   2  -4   8  978.90   25.20
   2  -4   8  962.50   24.80
  -2   4  -9  699.53   18.80
   2   4   9  716.83   19.00
  -2   4  -9  695.43   19.30
  -2   4  -9  666.03   18.40
   2  -4   9  708.13   18.40
   2  -4   9  689.63   19.10
  -2  -4  -9  719.53   19.80
  -2   4 -10  100.59    5.10
   2   4  10   87.29    4.70
  -2   4 -10   97.19    4.70
  -2  -4 -10   97.49    5.40
   2  -4  10   93.69    4.90
   2  -4  10   98.89    4.40
   2   4  11  171.68    7.10
  -2   4 -11  172.78    6.90
  -2   4 -11  179.58    7.40
   2  -4  11  180.98    7.40
   2  -4  11  172.38    6.30
  -2  -4 -11  177.38    7.70
  -2   4 -12  182.68    7.20
   2   4  12  168.88    7.50
   2   4  12  178.98    7.70
  -2   4 -12  175.28    7.80
   2  -4  12  167.98    6.40
  -2  -4 -12  176.18    8.20
   2  -4  12  175.38    7.50
   2   4  13  113.29    6.50
   2   4  13  127.79    6.70
  -2   4 -13  130.89    6.80
  -2   4 -13  120.09    6.30
   2  -4  13  126.19    5.40
  -2  -4 -13  130.19    7.40
   2  -4  13  129.89    6.80
   2   4  14   43.90    5.10
  -2   4 -14   42.10    4.90
   2   4  14   42.40    4.80
  -2   4 -14   58.89    5.00
   2  -4  14   42.80    3.70
   2  -4  14   53.99    5.00
  -2  -4 -14   57.29    8.20
   2   4  15   40.60    5.10
  -2   4 -15   31.30    5.30
  -2   4 -15   36.70    4.50
   2   4  15   44.50    5.10
   2  -4  15   37.80    3.90
   2  -4  15   34.30    4.40
  -2  -4 -15   48.70    5.70
  -2   4 -16   55.89    6.10
   2   4  16   53.49    6.00
  -2   4 -16   52.49    6.10
   2   4  16   53.49    6.00
   2  -4  16   57.79    6.60
  -2  -4 -16   51.09    6.20
   2   4  17   43.40    5.80
   2   4  17   53.19    6.60
  -2   4 -17   52.29    6.70
  -2   4 -17   57.39    7.40
  -2  -4 -17   41.40    6.20
   2  -4  17   42.10    5.80
  -2   4 -18    6.80    5.10
   2   4  18    7.40    4.80
  -2   4 -18    5.20    4.90
   2   4  18    6.10    4.50
  -2  -4 -18    7.00    5.10
   2  -4  18   -0.30    4.40
   2   5 -18   38.00    6.50
  -2   5  18   41.00    5.40
  -2   5  18   29.50    5.40
   2  -5 -18   35.90    6.20
  -2  -5  18   39.80    5.80
  -2   5  17    2.80    3.60
  -2   5  17    0.70    3.80
   2   5 -17   10.60    4.40
   2  -5 -17    6.80    4.20
  -2  -5  17    8.90    4.20
   2   5 -16   26.90    4.80
  -2   5  16   20.00    4.10
  -2   5  16   22.40    4.00
   2   5 -16   18.10    3.50
   2  -5 -16   29.40    5.10
  -2  -5  16   31.20    3.60
  -2  -5  16   25.00    4.20
  -2   5  15   -1.60    2.60
   2   5 -15    5.70    3.20
   2   5 -15    4.00    2.50
   2  -5 -15   -1.30    2.90
  -2  -5  15    0.30    2.50
  -2  -5  15   -0.50    2.30
  -2   5  14    5.90    2.60
   2   5 -14    8.20    2.30
   2   5 -14    2.30    2.80
  -2   5  14   -0.40    2.20
  -2  -5  14    6.10    2.50
  -2  -5  14    4.40    2.20
  -2   5  13    6.40    2.70
   2   5 -13   10.20    2.20
  -2   5  13    8.90    2.50
   2   5 -13    4.10    2.80
  -2  -5  13    4.70    2.40
  -2  -5  13    9.20    2.20
   2  -5 -13    4.20    2.80
   2   5 -12   15.00    3.10
   2   5 -12   13.90    2.20
  -2   5  12   12.50    2.70
  -2   5  12   15.00    2.40
  -2  -5  12   13.40    2.40
  -2  -5  12   19.10    2.50
  -2  -5  12   16.90    2.70
   2  -5 -12   19.40    3.30
   2   5 -11   17.50    2.20
  -2   5  11   16.80    2.40
   2   5 -11   21.10    3.10
  -2   5  11   15.60    2.80
  -2  -5  11   19.90    2.60
   2  -5 -11   21.80    3.30
  -2  -5  11   15.80    2.30
  -2  -5  11   17.80    2.40
   2   5 -10    8.00    2.10
   2   5 -10   11.40    1.80
  -2   5  10   11.00    2.00
  -2   5  10    6.80    2.00
  -2  -5  10   13.60    2.00
  -2  -5  10   15.30    1.90
   2  -5 -10   10.10    1.20
   2  -5 -10    8.90    2.30
  -2  -5  10   12.00    2.10
   2   5  -9    1.50    2.00
  -2   5   9    1.70    0.90
  -2   5   9   -1.20    1.50
  -2   5   9    0.50    1.20
   2   5  -9   -0.70    1.50
   2  -5  -9   -3.10    1.50
  -2  -5   9    0.90    1.30
  -2  -5   9    0.60    1.30
  -2  -5   9    1.10    1.40
   2  -5  -9    0.20    0.80
   2  -5  -9    2.00    1.70
   2   5  -8   84.09    3.40
   2   5  -8   79.09    4.40
  -2   5   8   79.09    3.70
  -2   5   8   82.29    3.10
  -2   5   8   82.79    4.40
   2   5  -8   66.59    3.80
   2  -5  -8   83.09    3.00
  -2  -5   8   77.69    3.80
  -2  -5   8   84.29    3.50
   2  -5  -8   77.79    4.50
  -2  -5   8   77.99    3.90
   2  -5  -8   80.79    3.80
  -2   5   7   83.89    3.60
   2   5  -7   84.09    4.30
  -2   5   7   76.79    4.10
   2   5  -7   83.39    3.80
  -2   5   7   85.19    3.30
   2   5  -7   86.69    3.30
   2  -5  -7   82.09    3.60
   2  -5  -7   85.79    3.20
   2  -5  -7   83.09    4.40
  -2  -5   7   84.49    3.40
  -2  -5   7   87.09    3.80
  -2  -5   7   83.49    3.90
  -2   5   6    5.00    1.40
  -2   5   6    3.30    1.00
   2   5  -6    4.00    1.00
  -2   5   6    2.70    1.10
   2   5  -6    3.00    1.50
   2   5  -6    1.50    1.30
   2   5  -6    1.10    1.10
   2  -5  -6    3.10    1.40
   2  -5  -6    2.90    0.90
  -2  -5   6    4.30    1.20
  -2  -5   6    1.90    1.10
   2  -5  -6    3.20    1.10
  -2  -5   6    3.90    1.30
  -2   5   5   86.99    3.40
  -2   5   5   80.99    4.20
  -2   5   5   84.19    3.90
   2   5  -5   84.49    3.80
   2   5  -5   87.29    4.00
  -2   5   5   85.29    3.10
   2   5  -5   84.99    3.20
   2   5  -5   87.59    3.40
   2  -5  -5   85.39    4.10
   2  -5  -5   83.69    3.10
  -2  -5   5   85.59    3.80
  -2  -5   5   80.79    3.90
  -2  -5   5   84.39    3.30
  -2  -5   5   91.99    3.30
   2  -5  -5   81.69    3.30
  -2   5   4    1.30    0.90
  -2   5   4    0.50    0.60
   2   5  -4   -0.30    0.70
   2   5  -4    0.80    1.20
  -2   5   4    1.50    1.50
  -2   5   4   -0.50    0.90
   2   5  -4   -0.40    0.70
   2   5  -4   -0.80    0.90
   2  -5  -4   -1.30    1.00
  -2  -5   4   -1.30    0.80
   2  -5  -4    1.40    1.30
  -2  -5   4    1.10    0.80
  -2  -5   4    1.50    0.70
   2  -5  -4    0.30    0.60
   2  -5  -4   -0.10    0.80
  -2   5   3   12.00    1.50
  -2   5   3    9.90    0.80
   2   5  -3   10.10    1.20
   2   5  -3    8.80    1.50
   2   5  -3   15.50    1.80
   2   5  -3   11.20    1.20
  -2   5   3    9.20    1.70
  -2   5   3   10.10    1.60
   2  -5  -3   11.70    0.80
   2  -5  -3   12.20    1.70
  -2  -5   3   11.10    1.50
  -2  -5   3   10.40    1.30
   2  -5  -3    8.90    1.50
   2  -5  -3    8.90    1.30
  -2  -5   3    9.60    1.10
   2   5  -2  324.37    9.40
   2   5  -2  325.47    9.50
   2   5  -2  309.37    8.80
  -2   5   2  316.97    9.40
  -2   5   2  322.77    9.10
   2   5  -2  312.77    9.10
  -2   5   2  323.67    9.50
   2  -5  -2  311.97    9.40
  -2  -5   2  325.87    9.30
   2  -5  -2  328.37    9.40
  -2  -5   2  328.07    8.90
  -2  -5   2  318.77    8.20
  -2   5   1   52.69    2.80
   2   5  -1   53.69    1.90
  -2   5   1   53.59    2.70
   2   5  -1   50.59    2.50
  -2   5   1   55.09    2.90
   2   5  -1   55.29    2.70
   2   5  -1   54.39    3.00
  -2  -5   1   53.29    2.60
  -2  -5   1   52.89    1.80
   2  -5  -1   51.49    2.80
   2  -5  -1   48.70    2.90
   2  -5  -1   53.09    2.70
  -2  -5   1   48.20    2.60
  -2   5   0    4.80    1.20
   2   5   0    4.40    1.20
  -2   5   0    4.20    1.20
   2   5   0    1.50    1.20
   2   5   0    5.80    0.80
  -2   5   0    5.10    1.20
   2   5   0    4.20    1.10
  -2  -5   0    5.00    1.30
   2  -5   0    4.90    1.30
  -2  -5   0    4.40    1.20
   2  -5   0    3.50    1.10
   2   5   1  124.69    3.50
   2   5   1  118.89    4.70
  -2   5  -1  121.29    4.50
  -2   5  -1  121.79    4.50
   2   5   1  120.59    3.50
  -2   5  -1  124.79    4.50
   2   5   1  125.79    4.20
   2  -5   1  123.79    3.20
  -2  -5  -1  119.49    4.70
  -2  -5  -1  109.69    4.20
   2  -5   1  116.99    4.50
   2  -5   1  122.39    4.50
   2  -5   1  121.29    3.20
  -2   5  -2   99.39    4.00
   2   5   2   86.89    3.20
  -2   5  -2   95.99    2.90
  -2   5  -2   99.19    4.10
   2   5   2   98.99    3.10
   2   5   2   93.99    3.90
   2   5   2  100.19    3.60
   2   5   2   97.79    4.20
  -2   5  -2   88.79    3.90
  -2   5  -2   97.89    4.00
   2  -5   2   95.89    2.90
  -2  -5  -2   98.49    3.60
   2  -5   2   96.89    3.90
   2  -5   2   98.99    3.90
  -2  -5  -2   94.49    4.20
  -2   5  -3  127.09    4.80
  -2   5  -3  127.19    4.90
   2   5   3  131.99    4.40
   2   5   3  137.09    5.00
   2   5   3  138.59    4.10
  -2   5  -3  135.99    4.10
   2   5   3  129.29    4.10
  -2   5  -3  136.49    5.00
   2   5   3  141.29    5.90
  -2  -5  -3  136.79    4.50
   2  -5   3  136.59    4.80
  -2  -5  -3  130.99    5.20
   2  -5   3  143.69    5.00
   2  -5   3  130.39    4.10
  -2   5  -4   28.90    2.40
   2   5   4   32.60    2.50
  -2   5  -4   34.20    1.90
   2   5   4   37.00    2.00
   2   5   4   35.80    1.90
  -2   5  -4   33.60    2.40
  -2   5  -4   35.00    2.60
   2   5   4   37.90    3.00
   2   5   4   30.10    2.80
   2  -5   4   31.90    1.90
   2  -5   4   35.30    2.40
   2  -5   4   35.20    2.40
  -2  -5  -4   33.70    1.90
  -2  -5  -4   34.10    2.70
  -2   5  -5    7.80    1.50
  -2   5  -5    3.50    1.20
   2   5   5    2.60    1.00
   2   5   5    4.00    1.00
  -2   5  -5    3.50    1.40
   2   5   5    2.20    1.30
  -2   5  -5    3.50    1.40
   2  -5   5    3.50    1.20
   2  -5   5    1.50    1.00
   2  -5   5    2.90    1.50
  -2  -5  -5    4.00    1.50
  -2  -5  -5    2.80    0.80
   2  -5   5    3.10    1.30
  -2   5  -6   10.40    1.80
   2   5   6   14.20    1.50
  -2   5  -6   12.00    2.10
   2   5   6   14.00    2.10
  -2   5  -6   18.00    2.20
  -2   5  -6   12.60    1.70
   2   5   6   13.40    1.70
  -2  -5  -6   12.00    1.40
  -2  -5  -6   11.00    2.10
   2  -5   6   12.10    1.60
   2  -5   6   13.80    1.90
   2  -5   6   10.60    1.80
  -2  -5  -6   14.30    1.70
   2  -5   6   13.40    1.80
   2   5   7  394.96    9.80
  -2   5  -7  365.96   11.00
  -2   5  -7  384.66   11.50
  -2   5  -7  376.66   11.00
   2   5   7  398.76   11.00
   2   5   7  376.26   11.70
   2  -5   7  387.76   11.10
  -2  -5  -7  393.56   12.10
  -2  -5  -7  379.46    9.70
   2  -5   7  381.96   11.00
   2  -5   7  376.16   11.10
  -2  -5  -7  360.36   10.80
  -2   5  -8  297.77    9.70
   2   5   8  297.97    9.20
   2   5   8  292.47    9.80
   2   5   8  303.17    7.50
  -2   5  -8  296.07    9.30
   2  -5   8  287.17    9.20
   2  -5   8  283.57    9.20
  -2  -5  -8  299.47   10.20
   2  -5   8  297.07    9.20
  -2   5  -9   29.90    3.00
   2   5   9   27.60    2.70
   2   5   9   24.30    3.10
  -2   5  -9   30.00    3.30
   2  -5   9   27.40    2.80
   2  -5   9   28.90    2.90
  -2  -5  -9   28.80    3.40
   2   5  10  106.49    5.90
   2   5  10  109.89    5.30
  -2   5 -10  104.49    5.40
  -2   5 -10  114.19    5.20
   2  -5  10  114.99    5.10
   2  -5  10  110.49    5.40
  -2  -5 -10  114.59    6.00
   2   5  11   35.50    3.80
   2   5  11   35.00    3.90
  -2   5 -11   35.30    3.80
  -2   5 -11   39.80    3.70
   2  -5  11   41.40    3.50
  -2  -5 -11   41.20    4.60
   2  -5  11   46.70    4.10
   2   5  12  127.19    6.40
  -2   5 -12  115.69    6.40
  -2   5 -12  120.39    6.00
   2   5  12  129.39    6.70
   2  -5  12  130.69    6.30
  -2  -5 -12  127.09    7.00
   2  -5  12  122.49    5.60
   2   5  13   27.80    3.70
  -2   5 -13   29.00    3.60
   2   5  13   27.70    3.80
  -2   5 -13   32.60    4.30
   2  -5  13   36.10    3.80
   2  -5  13   29.90    3.90
  -2  -5 -13   27.70    4.30
  -2   5 -14    7.30    3.20
   2   5  14    7.40    2.80
   2   5  14   13.80    3.30
  -2   5 -14    9.20    3.10
  -2  -5 -14   15.00    3.90
   2  -5  14    6.10    2.40
   2   5  15   37.50    4.60
  -2   5 -15   46.30    5.40
   2   5  15   29.70    4.30
  -2   5 -15   27.90    4.70
   2  -5  15   31.40    3.50
  -2  -5 -15   39.60    5.20
   2  -5  15   29.90    4.60
   2   5  16   61.89    6.60
  -2   5 -16   69.29    6.70
  -2   5 -16   82.59    7.50
   2   5  16   73.39    6.50
  -2  -5 -16   65.99    7.20
   2  -5  16   54.09    5.90
   2   5  17   18.30    4.60
   2   5  17   18.30    4.60
  -2   5 -17   19.60    5.20
  -2   5 -17   20.20    4.90
  -2  -5 -17   17.80    5.20
   2  -5  17   17.10    4.70
  -2   6  18  107.09    8.70
   2   6 -18  116.39   10.10
  -2   6  18  122.49    9.40
   2  -6 -18  127.49    9.80
  -2  -6  18  109.59    8.50
  -2   6  17    1.90    3.80
   2   6 -17   -4.70    4.50
  -2   6  17   -6.60    3.70
   2  -6 -17    1.60    4.50
  -2  -6  17   -3.80    3.80
   2   6 -16  149.69    9.50
  -2   6  16  155.48    8.50
  -2   6  16  155.48    8.20
   2  -6 -16  144.69    9.30
  -2  -6  16  152.78    8.30
  -2  -6  16  149.79    7.60
   2   6 -15   -0.40    3.30
   2   6 -15    4.00    2.70
  -2   6  15    1.70    3.30
  -2   6  15    5.60    2.90
   2  -6 -15    0.40    3.20
  -2  -6  15    1.20    2.60
  -2  -6  15    1.30    3.20
   2   6 -14  258.17   11.30
  -2   6  14  270.87   10.00
   2   6 -14  256.87    8.90
  -2  -6  14  256.97    9.40
   2  -6 -14  271.97   11.40
  -2  -6  14  263.37   10.20
  -2   6  13   62.49    5.20
  -2   6  13   65.29    4.60
   2   6 -13   58.99    5.40
   2   6 -13   67.79    4.30
  -2  -6  13   65.69    4.80
   2  -6 -13   66.49    5.80
  -2  -6  13   70.29    5.30
  -2   6  12  639.14   18.30
  -2   6  12  629.14   19.10
   2   6 -12  645.04   17.40
   2   6 -12  659.83   19.70
   2  -6 -12  646.14   19.90
  -2  -6  12  655.13   18.30
  -2  -6  12  647.34   18.70
  -2   6  11   25.90    2.90
   2   6 -11   30.60    3.90
  -2   6  11   32.20    4.00
   2   6 -11   33.80    3.00
  -2  -6  11   34.80    3.40
   2  -6 -11   34.20    1.70
   2  -6 -11   26.20    3.70
  -2  -6  11   34.60    3.70
  -2  -6  11   34.50    3.30
   2   6 -10  904.91   23.20
  -2   6  10  915.21   24.90
  -2   6  10  921.21   22.30
   2   6 -10  900.21   25.10
  -2   6  10  917.71   23.80
  -2  -6  10  908.71   23.20
   2  -6 -10  907.81   22.20
  -2  -6  10  921.91   24.10
  -2  -6  10  898.81   24.10
   2  -6 -10  883.41   25.40
   2   6  -9  145.79    6.60
  -2   6   9  144.59    4.70
   2   6  -9  136.99    5.10
  -2   6   9  133.59    5.40
  -2   6   9  144.89    6.30
   2  -6  -9  134.79    5.60
   2  -6  -9  144.99    6.70
  -2  -6   9  137.49    5.10
  -2  -6   9  134.39    5.80
  -2  -6   9  142.99    5.60
   2  -6  -9  138.39    4.60
   2   6  -8 1893.71   45.00
   2   6  -8 1633.44   43.70
  -2   6   8 1849.91   43.10
  -2   6   8 1802.52   45.00
   2   6  -8 1753.92   45.00
  -2   6   8 1742.83   43.50
   2  -6  -8 1754.12   43.00
  -2  -6   8 1793.52   43.30
  -2  -6   8 1791.12   43.90
  -2  -6   8 1773.72   44.30
   2  -6  -8 1801.02   43.50
   2  -6  -8 1788.02   45.40
  -2   6   7    7.90    1.50
   2   6  -7    8.90    1.80
  -2   6   7    7.30    1.80
   2   6  -7    9.60    2.00
   2   6  -7    6.00    1.70
  -2  -6   7    6.50    1.70
   2  -6  -7    7.10    1.50
   2  -6  -7    8.10    2.00
   2  -6  -7    8.60    1.50
  -2  -6   7    7.20    1.50
  -2  -6   7    7.00    1.40
   2   6  -6 1276.87   31.70
  -2   6   6 1267.87   31.30
  -2   6   6 1268.77   32.90
   2   6  -6 1287.37   33.00
   2   6  -6 1264.97   31.60
  -2   6   6 1330.57   31.80
  -2  -6   6 1299.07   31.60
  -2  -6   6 1319.07   31.80
   2  -6  -6 1337.17   31.30
  -2  -6   6 1277.87   32.50
   2  -6  -6 1224.38   33.10
   2  -6  -6 1286.57   31.80
  -2   6   5  187.28    6.00
   2   6  -5  180.28    6.60
   2   6  -5  179.08    5.60
  -2   6   5  175.88    5.20
   2   6  -5  172.88    5.70
  -2   6   5  178.88    6.60
  -2  -6   5  177.28    6.40
   2  -6  -5  173.48    6.70
  -2  -6   5  176.18    5.60
   2  -6  -5  186.78    5.20
   2  -6  -5  174.28    5.80
  -2  -6   5  173.48    5.70
  -2   6   4 2227.28   51.99
  -2   6   4 2096.19   50.79
   2   6  -4 2113.79   51.79
   2   6  -4 2146.19   51.39
   2   6  -4 2181.58   52.89
  -2   6   4 2134.69   52.79
   2  -6  -4 2134.19   51.99
   2  -6  -4 2119.19   50.79
  -2  -6   4 2145.99   51.29
  -2  -6   4 2171.48   52.49
  -2  -6   4 2179.38   51.89
   2  -6  -4 2154.48   53.09
  -2   6   3  219.38    7.50
   2   6  -3  203.18    7.50
  -2   6   3  209.18    7.30
   2   6  -3  225.38    7.80
  -2   6   3  220.08    5.40
   2   6  -3  224.28    6.10
  -2   6   3  221.78    7.00
   2   6  -3  211.48    6.70
   2   6  -3  215.28    7.40
   2  -6  -3  219.88    7.50
  -2  -6   3  224.88    7.20
   2  -6  -3  239.18    7.10
   2  -6  -3  218.38    7.50
  -2  -6   3  219.68    6.10
  -2  -6   3  223.68    6.80
   2   6  -2 1941.41   48.10
  -2   6   2 2007.20   48.00
  -2   6   2 1939.51   48.40
  -2   6   2 2069.29   48.70
   2   6  -2 1927.41   48.50
   2   6  -2 1916.41   48.50
  -2  -6   2 1922.21   46.80
   2  -6  -2 1934.11   48.60
   2  -6  -2 1929.61   48.00
  -2  -6   2 2026.90   48.30
   2  -6  -2 2034.70   48.50
  -2  -6   2 2048.30   47.90
   2   6  -1    1.00    0.60
   2   6  -1    0.40    1.10
   2   6  -1    1.30    1.20
  -2   6   1    1.40    1.20
  -2   6   1    2.30    1.30
  -2   6   1   -1.20    1.40
   2   6  -1    8.60    1.80
  -2  -6   1    2.50    1.20
   2  -6  -1   -0.60    1.30
   2  -6  -1    6.40    1.30
  -2  -6   1    2.10    0.50
   2  -6  -1    2.70    1.30
  -2  -6   1    0.10    1.00
  -2   6   0 2799.32   64.89
   2   6   0 2686.53   64.39
  -2   6   0 2612.74   64.69
  -2   6   0 2688.93   64.59
   2   6   0 2635.74   62.99
   2   6   0 2579.34   64.49
   2   6   0 2652.33   64.99
  -2  -6   0 2657.83   64.49
  -2  -6   0 2828.22   64.59
   2  -6   0 2567.04   64.59
   2  -6   0 2770.12   64.69
  -2   6  -1  671.23   18.10
   2   6   1  692.73   16.60
   2   6   1  690.53   18.10
   2   6   1  697.93   17.90
   2   6   1  666.33   18.50
   2   6   1  678.33   16.60
  -2   6  -1  698.13   18.20
  -2   6  -1  683.03   18.20
  -2   6  -1  716.63   18.40
   2  -6   1  696.53   18.10
  -2  -6  -1  669.03   18.60
  -2  -6  -1  670.73   17.80
   2  -6   1  693.13   18.20
   2   6   2 2369.06   56.49
  -2   6  -2 2350.46   56.99
   2   6   2 2388.76   57.09
  -2   6  -2 2397.06   57.09
  -2   6  -2 2323.37   57.09
   2   6   2 2232.28   55.49
  -2   6  -2 2308.07   56.89
   2   6   2 2435.76   57.69
   2  -6   2 2262.37   55.29
  -2  -6  -2 2346.27   56.59
   2  -6   2 2361.56   57.09
   2  -6   2 2425.56   56.89
  -2  -6  -2 2317.47   57.49
  -2   6  -3  157.18    4.50
  -2   6  -3  146.09    5.60
   2   6   3  147.09    4.50
  -2   6  -3  157.28    5.60
   2   6   3  154.88    4.50
   2   6   3  155.58    5.70
   2   6   3  157.88    5.30
  -2   6  -3  144.79    5.70
  -2  -6  -3  149.88    5.20
   2  -6   3  145.99    5.60
   2  -6   3  155.58    5.60
  -2  -6  -3  143.79    6.00
   2  -6   3  147.49    4.50
  -2   6  -4 1533.45   36.00
   2   6   4 1529.45   36.00
   2   6   4 1547.95   36.40
   2   6   4 1418.86   35.90
   2   6   4 1568.54   37.60
  -2   6  -4 1495.35   37.20
  -2   6  -4 1473.45   37.00
   2  -6   4 1481.65   37.20
  -2  -6  -4 1487.95   37.80
   2  -6   4 1488.05   36.00
  -2  -6  -4 1375.06   36.90
   2  -6   4 1486.95   36.90
   2   6   5   22.20    2.60
   2   6   5   26.30    2.00
  -2   6  -5   21.50    2.20
  -2   6  -5   24.50    2.60
   2   6   5   29.40    2.30
  -2   6  -5   29.20    2.50
   2  -6   5   27.60    2.80
   2  -6   5   21.50    2.50
  -2  -6  -5   24.10    2.00
  -2  -6  -5   24.60    2.80
   2  -6   5   24.00    2.10
  -2   6  -6 1444.26   35.00
   2   6   6 1456.25   34.60
   2   6   6 1427.96   34.90
  -2   6  -6 1423.66   35.50
  -2   6  -6 1416.26   36.00
   2   6   6 1450.45   36.30
   2  -6   6 1412.66   35.00
   2  -6   6 1403.16   35.80
  -2  -6  -6 1406.96   36.60
   2  -6   6 1399.66   35.50
  -2  -6  -6 1396.26   34.50
  -2   6  -7   41.80    3.20
  -2   6  -7   46.70    3.40
   2   6   7   40.00    2.90
   2   6   7   44.60    3.50
   2   6   7   40.50    2.50
  -2   6  -7   44.00    3.20
  -2  -6  -7   41.80    3.80
   2  -6   7   42.50    3.30
   2  -6   7   41.20    2.90
  -2  -6  -7   47.30    2.30
  -2   6  -8  272.37    9.00
   2   6   8  269.87    9.60
   2   6   8  287.57    7.60
  -2   6  -8  265.97    9.40
   2   6   8  279.17    8.80
   2  -6   8  269.67    9.10
  -2  -6  -8  287.97    7.50
  -2  -6  -8  285.67   10.10
   2  -6   8  277.27    8.90
  -2   6  -9   72.69    4.20
   2   6   9   74.59    4.80
  -2   6  -9   85.69    4.70
   2   6   9   73.49    2.60
   2   6   9   68.29    4.10
   2  -6   9   67.69    4.20
   2  -6   9   70.99    4.20
  -2  -6  -9   80.59    5.30
  -2   6 -10  527.55   15.30
  -2   6 -10  535.45   16.00
   2   6  10  515.15   16.10
   2   6  10  523.65   15.20
   2  -6  10  541.45   15.50
   2  -6  10  530.35   15.20
  -2  -6 -10  514.25   16.50
   2   6  11   43.30    4.10
  -2   6 -11   34.00    4.10
  -2   6 -11   44.00    4.10
   2   6  11   41.60    4.30
   2  -6  11   42.30    4.00
   2  -6  11   36.40    4.00
  -2  -6 -11   43.00    4.60
  -2   6 -12  228.18    9.40
   2   6  12  243.58    9.90
  -2   6 -12  233.28    8.80
   2   6  12  240.88    9.10
   2  -6  12  224.58    8.50
   2  -6  12  232.38    9.10
  -2  -6 -12  229.68   10.00
   2   6  13    5.30    2.80
   2   6  13    7.90    3.10
  -2   6 -13    7.20    3.00
  -2   6 -13    9.70    2.90
  -2  -6 -13   10.10    3.30
   2  -6  13   12.60    3.10
   2  -6  13    8.60    2.70
  -2   6 -14  136.89    8.10
   2   6  14  125.39    7.80
  -2   6 -14  128.59    7.00
   2   6  14  130.09   10.40
  -2  -6 -14  116.19    8.30
   2  -6  14  114.09    6.30
   2  -6  14  119.59    7.30
   2   6  15   -1.50    3.50
  -2   6 -15   -0.80    3.40
  -2   6 -15    1.40    3.30
   2   6  15    2.40    3.40
   2  -6  15    3.00    3.20
  -2  -6 -15   -0.80    4.10
   2  -6  15   -2.70    2.90
   2   6  16   33.80    5.00
  -2   6 -16   24.00    4.80
   2   6  16   39.00    5.40
  -2   6 -16   34.10    5.60
  -2  -6 -16   34.60    5.90
   2  -6  16   30.30    5.00
   2   6  17   -2.50    4.80
   2   6  17    5.90    4.50
  -2   6 -17   -9.00    4.90
   2  -6  17   -1.00    4.20
  -2  -6 -17    6.30    5.00
  -2   7  17   -0.20    4.30
  -2   7  17    5.00    4.30
   2   7 -17    7.80    4.80
   2  -7 -17    1.50    4.80
  -2  -7  17   -0.60    4.00
  -2  -7  17    2.90    4.00
  -2   7  16    4.40    3.70
  -2   7  16    5.40    3.80
   2   7 -16    5.00    4.20
   2  -7 -16    2.70    4.30
  -2  -7  16   -1.70    3.50
   2   7 -15   77.69    7.50
  -2   7  15   86.29    6.80
   2  -7 -15   74.89    7.20
  -2  -7  15   70.49    5.90
  -2  -7  15   81.59    6.70
   2   7 -14    1.70    2.50
   2   7 -14   -1.50    3.20
  -2   7  14   -2.20    2.70
  -2   7  14    0.50    3.30
  -2  -7  14   -2.80    2.60
   2  -7 -14   -2.00    3.10
  -2  -7  14   -1.60    2.80
   2   7 -13   21.90    4.80
   2   7 -13   24.70    2.90
  -2   7  13   29.70    4.30
  -2   7  13   27.20    3.50
  -2  -7  13   23.90    3.40
  -2  -7  13   24.10    3.40
   2  -7 -13   29.40    4.60
   2   7 -12   -3.10    1.90
  -2   7  12    2.00    2.00
   2   7 -12    2.60    2.60
  -2   7  12    1.50    2.40
   2  -7 -12   -0.90    2.50
  -2  -7  12   -2.40    2.10
  -2  -7  12    2.50    2.40
   2   7 -11   27.20    3.30
  -2   7  11   32.00    3.40
  -2   7  11   31.40    3.90
   2   7 -11   29.20    3.90
   2  -7 -11   29.60    2.20
  -2  -7  11   30.70    3.60
   2  -7 -11   34.80    4.30
  -2  -7  11   30.90    3.70
   2   7 -10   22.10    3.30
  -2   7  10   22.70    2.70
  -2   7  10   22.20    2.50
  -2   7  10   23.00    3.40
   2   7 -10   24.90    2.90
  -2  -7  10   17.10    2.60
   2  -7 -10   22.80    3.70
  -2  -7  10   18.90    2.60
   2  -7 -10   19.40    2.30
  -2  -7  10   23.50    3.10
  -2   7   9   -0.90    1.90
  -2   7   9    0.30    1.40
  -2   7   9    4.20    1.70
   2   7  -9    2.10    2.30
   2   7  -9    3.20    1.60
   2  -7  -9   -0.60    1.30
  -2  -7   9   -2.40    1.80
  -2  -7   9   -0.20    1.80
   2  -7  -9   -1.30    2.10
  -2  -7   9    1.40    1.50
   2  -7  -9    1.10    1.90
  -2   7   8    3.40    2.00
   2   7  -8    5.60    1.60
   2   7  -8    7.60    2.10
  -2   7   8    6.00    1.50
  -2   7   8    8.70    1.90
  -2  -7   8    4.90    1.90
  -2  -7   8    5.50    1.60
   2  -7  -8    7.80    1.70
  -2  -7   8    7.30    1.90
   2  -7  -8    7.00    1.50
   2  -7  -8    7.20    2.40
   2   7  -7    3.50    1.70
  -2   7   7    0.80    1.10
  -2   7   7    2.00    1.70
   2   7  -7    2.70    1.40
  -2   7   7    3.60    1.70
   2   7  -7    0.80    1.70
  -2  -7   7    2.80    1.60
  -2  -7   7    2.20    1.20
   2  -7  -7    2.10    1.40
   2  -7  -7    2.20    1.30
  -2  -7   7    1.50    1.60
   2  -7  -7   -3.60    1.60
   2   7  -6    1.80    1.30
  -2   7   6    3.70    0.90
  -2   7   6   -1.20    1.60
   2   7  -6    1.70    1.40
  -2   7   6    4.10    1.70
   2   7  -6    3.70    1.70
  -2  -7   6    1.20    1.50
  -2  -7   6   -0.60    1.00
   2  -7  -6    1.30    1.00
   2  -7  -6    0.70    1.70
  -2  -7   6    1.30    1.50
   2  -7  -6    1.20    1.20
   2   7  -5   19.90    2.10
  -2   7   5   14.20    2.10
   2   7  -5   18.40    2.50
   2   7  -5   17.70    2.20
  -2   7   5   19.00    1.40
  -2   7   5   15.40    2.40
  -2  -7   5   19.60    2.10
   2  -7  -5   19.20    2.20
  -2  -7   5   17.50    2.30
   2  -7  -5   15.90    2.70
  -2  -7   5   19.40    1.90
  -2   7   4   23.20    2.70
   2   7  -4   15.30    2.30
   2   7  -4   17.40    2.10
  -2   7   4   16.60    0.90
   2   7  -4   17.50    1.70
  -2   7   4   15.30    2.30
  -2  -7   4   17.60    1.60
   2  -7  -4   16.90    2.00
  -2  -7   4   14.80    2.10
   2  -7  -4   17.00    2.40
  -2  -7   4   18.10    2.00
   2   7  -3   30.30    1.70
  -2   7   3   26.10    2.70
  -2   7   3   32.40    2.80
   2   7  -3   27.10    2.40
   2   7  -3   28.20    2.70
  -2  -7   3   30.30    2.70
  -2  -7   3   29.00    1.60
  -2  -7   3   27.70    2.60
   2  -7  -3   30.20    2.40
   2  -7  -3   28.30    3.00
   2   7  -2    1.20    1.20
   2   7  -2   -0.70    0.60
  -2   7   2   -0.30    1.30
   2   7  -2    0.40    1.20
  -2  -7   2   -1.50    1.30
  -2  -7   2   -1.10    1.10
   2  -7  -2   -0.50    1.10
   2  -7  -2   -0.50    1.20
  -2  -7   2    0.80    0.60
   2   7  -1    2.60    0.60
   2   7  -1    3.50    1.40
  -2   7   1    3.40    1.40
   2  -7  -1    2.60    1.30
  -2  -7   1    0.00    1.50
  -2  -7   1    2.10    1.20
   2   7   0    6.80    0.70
  -2   7   0    8.60    1.70
   2   7   0    7.90    1.70
   2   7   0    8.10    0.80
   2  -7   0    6.40    1.60
  -2  -7   0    5.20    1.40
  -2  -7   0    8.50    1.80
  -2   7  -1   82.69    4.00
   2   7   1   80.79    4.00
   2   7   1   78.59    4.30
   2   7   1   82.89    2.40
  -2   7  -1   81.19    4.00
   2   7   1   81.29    2.40
   2  -7   1   75.89    3.90
  -2  -7  -1   77.79    3.90
   2   7   2   19.20    2.30
  -2   7  -2   15.60    2.10
   2   7   2   14.00    2.10
   2   7   2   19.10    1.20
  -2   7  -2   14.30    2.00
   2   7   2   13.50    1.10
   2  -7   2   13.20    2.00
  -2  -7  -2   14.60    1.90
  -2  -7  -2   14.70    2.30
   2  -7   2   15.90    0.90
   2  -7   2   14.30    0.90
  -2   7  -3   38.00    3.00
   2   7   3   39.00    1.90
   2   7   3   33.90    3.00
   2   7   3   34.70    2.80
   2   7   3   37.20    1.80
  -2   7  -3   38.20    2.90
   2  -7   3   41.20    3.00
   2  -7   3   35.30    1.80
  -2  -7  -3   34.30    2.50
  -2  -7  -3   37.30    3.20
   2   7   4   94.59    3.40
   2   7   4   82.79    4.50
  -2   7  -4   91.79    4.50
  -2   7  -4   93.79    4.50
   2   7   4   92.39    3.30
   2   7   4   92.29    4.10
  -2   7  -4   95.59    3.40
   2  -7   4   91.69    3.40
   2  -7   4   91.89    4.50
  -2  -7  -4   93.09    3.90
  -2  -7  -4   90.49    4.90
   2   7   5  572.84   16.30
   2   7   5  569.14   14.50
  -2   7  -5  542.65   15.60
  -2   7  -5  563.14   14.60
   2   7   5  568.84   14.60
  -2   7  -5  561.44   16.00
   2   7   5  571.14   15.00
   2  -7   5  546.05   14.60
  -2  -7  -5  544.05   16.50
  -2  -7  -5  557.54   14.90
   2  -7   5  582.34   16.10
  -2   7  -6   19.30    2.40
  -2   7  -6   27.60    2.50
   2   7   6   26.60    2.40
   2   7   6   24.00    3.10
   2   7   6   32.80    2.70
  -2   7  -6   24.10    2.90
   2  -7   6   29.20    2.40
  -2  -7  -6   28.20    2.20
  -2  -7  -6   26.00    3.30
   2  -7   6   25.90    3.20
  -2   7  -7    6.40    1.90
   2   7   7    7.30    1.70
  -2   7  -7    6.30    1.90
   2   7   7    8.50    2.30
   2   7   7    7.40    1.60
  -2   7  -7   11.90    2.50
  -2  -7  -7    9.70    2.50
  -2  -7  -7    7.60    2.50
   2  -7   7    6.10    2.00
   2  -7   7    6.30    1.60
   2   7   8    2.30    2.10
  -2   7  -8    2.60    1.70
  -2   7  -8    2.10    1.80
   2   7   8    2.30    1.50
   2   7   8    2.30    1.50
  -2  -7  -8    4.90    2.30
  -2  -7  -8    3.70    1.30
   2  -7   8    4.90    1.70
   2  -7   8    0.70    1.70
   2   7   9  216.08    6.30
   2   7   9  208.58    7.50
   2   7   9  210.48    8.60
  -2   7  -9  200.68    8.30
  -2   7  -9  215.28    7.90
  -2  -7  -9  211.28    6.10
   2  -7   9  214.18    8.00
  -2  -7  -9  211.88    9.00
   2  -7   9  217.78    7.70
  -2   7 -10   14.50    2.70
   2   7  10   10.50    2.30
   2   7  10   15.70    3.10
  -2   7 -10    9.90    2.90
   2  -7  10   13.40    2.70
   2  -7  10   12.00    2.50
  -2  -7 -10   10.90    3.00
  -2   7 -11   54.29    4.60
   2   7  11   63.39    5.20
   2   7  11   59.79    4.40
  -2   7 -11   58.89    4.90
  -2  -7 -11   48.20    5.20
   2  -7  11   55.79    4.80
   2  -7  11   66.29    4.80
   2   7  12   11.60    2.60
  -2   7 -12    8.70    2.90
   2   7  12    5.00    2.90
  -2   7 -12    9.10    3.00
   2  -7  12    5.30    2.70
   2  -7  12    8.90    2.70
  -2  -7 -12    5.70    3.20
   2   7  13  118.29    6.70
  -2   7 -13  121.59    6.90
   2   7  13  119.89    7.40
   2  -7  13  108.89    6.30
  -2  -7 -13  123.09    8.30
   2  -7  13  125.29    6.70
  -2   7 -14    2.80    3.70
   2   7  14    1.40    5.00
   2   7  14   10.30    3.90
  -2   7 -14    3.50    3.40
   2  -7  14    4.70    3.20
  -2  -7 -14   10.40    4.10
   2  -7  14    1.00    3.10
   2   7  15   85.29    7.10
  -2   7 -15   70.49    7.00
   2   7  15   56.49    7.10
  -2   7 -15   71.79    6.90
   2  -7  15   77.69    7.10
   2  -7  15   66.59    6.00
  -2  -7 -15   67.59    7.50
  -2   7 -16   -2.80    4.60
   2   7  16   -2.90    4.00
   2   7  16   -2.70    4.20
  -2  -7 -16   -0.80    4.90
   2  -7  16    0.10    4.20
  -2   8  16   -4.60    3.80
  -2   8  16    9.50    4.70
   2   8 -16    5.40    5.00
  -2  -8  16    5.50    4.20
   2  -8 -16    7.60    5.30
  -2  -8  16   -4.80    3.70
  -2   8  15  227.08   10.80
   2   8 -15  233.48   11.30
   2  -8 -15  216.68   12.00
  -2  -8  15  222.48    9.80
   2   8 -14    5.50    4.00
  -2   8  14    8.30    3.20
  -2   8  14   11.10    3.80
  -2  -8  14    2.10    3.10
   2  -8 -14   14.20    4.20
  -2  -8  14    5.60    3.80
   2   8 -13  255.17   10.90
   2   8 -13  232.28    8.50
  -2   8  13  223.78   10.20
  -2   8  13  241.88    9.20
  -2  -8  13  226.58    9.30
  -2  -8  13  233.18   10.40
   2  -8 -13  236.08   11.20
  -2   8  12   71.09    5.90
   2   8 -12   55.39    5.60
   2   8 -12   74.19    4.60
  -2   8  12   70.19    4.90
  -2  -8  12   66.99    5.10
  -2  -8  12   68.89    5.30
   2  -8 -12   67.49    6.20
   2   8 -11  522.65   16.80
   2   8 -11  491.25   14.30
  -2   8  11  500.55   16.70
  -2   8  11  501.75   14.60
  -2  -8  11  521.15   15.90
  -2  -8  11  518.85   15.20
  -2   8  10   43.60    3.60
  -2   8  10   51.09    4.70
   2   8 -10   45.70    3.80
   2   8 -10   54.29    4.90
   2  -8 -10   56.79    3.30
   2  -8 -10   50.49    5.10
  -2  -8  10   51.59    3.90
  -2  -8  10   54.99    4.70
   2   8  -9  621.14   19.00
  -2   8   9  648.14   17.80
  -2   8   9  639.34   16.80
  -2   8   9  625.64   18.80
   2   8  -9  620.54   17.10
  -2  -8   9  628.04   18.40
   2  -8  -9  633.54   16.70
  -2  -8   9  630.44   17.30
   2  -8  -9  634.54   19.50
  -2   8   8   48.40    3.00
  -2   8   8   47.70    4.20
   2   8  -8   46.70    3.40
   2   8  -8   44.90    4.30
  -2   8   8   39.90    3.90
  -2  -8   8   48.40    3.30
  -2  -8   8   48.10    4.20
   2  -8  -8   46.20    3.20
   2  -8  -8   45.20    4.40
  -2  -8   8   34.70    3.80
  -2   8   7 1085.49   26.20
   2   8  -7 1052.49   27.10
  -2   8   7 1036.50   28.60
   2   8  -7 1042.70   26.80
   2   8  -7 1079.59   28.80
  -2  -8   7 1041.70   27.00
   2  -8  -7 1070.59   27.10
  -2  -8   7 1068.49   26.80
  -2  -8   7 1106.09   28.40
   2  -8  -7 1062.09   29.10
   2   8  -6   36.90    3.60
  -2   8   6   37.10    2.10
   2   8  -6   34.70    3.00
   2   8  -6   43.70    3.00
  -2   8   6   41.40    3.80
  -2  -8   6   47.00    3.50
  -2  -8   6   36.60    3.50
   2  -8  -6   32.00    3.80
  -2  -8   6   33.30    2.50
   2  -8  -6   40.70    3.00
  -2   8   5 1158.08   29.80
  -2   8   5 1115.69   26.50
  -2   8   5 1095.69   26.50
   2   8  -5 1125.09   29.60
   2   8  -5 1121.99   28.40
   2   8  -5 1139.39   27.50
  -2  -8   5 1086.79   28.30
   2  -8  -5 1081.69   28.40
  -2  -8   5 1104.49   27.40
   2  -8  -5 1127.69   30.00
  -2  -8   5 1120.79   29.30
  -2   8   4   24.70    2.90
   2   8  -4   24.60    3.00
   2   8  -4   25.90    1.90
   2   8  -4   21.20    2.60
   2  -8  -4   22.70    3.10
   2  -8  -4   24.40    2.40
  -2  -8   4   28.70    3.10
  -2  -8   4   23.50    2.90
  -2  -8   4   22.50    1.80
   2   8  -3 1504.45   36.90
   2   8  -3 1566.84   38.40
  -2   8   3 1527.35   39.20
   2   8  -3 1539.85   39.30
  -2  -8   3 1575.94   39.00
  -2  -8   3 1553.24   36.70
  -2  -8   3 1497.95   38.30
   2  -8  -3 1517.55   39.50
   2  -8  -3 1576.64   38.60
   2   8  -2   34.50    1.50
   2   8  -2   31.00    3.20
   2   8  -2   38.60    3.10
  -2   8   2   31.80    3.20
   2  -8  -2   32.00    3.50
  -2  -8   2   38.70    3.20
  -2  -8   2   34.90    1.40
   2  -8  -2   31.50    2.90
  -2   8   1 2201.08   53.89
   2   8  -1 2259.17   54.19
   2   8  -1 2083.89   50.89
   2   8  -1 2204.78   53.49
   2   8  -1 2085.39   50.89
   2  -8  -1 2211.68   53.59
  -2  -8   1 2192.08   53.59
   2   8   0  122.39    5.30
  -2   8   0  126.69    5.50
  -2  -8   0  119.39    5.30
   2  -8   0  127.89    5.40
  -2   8  -1 1227.68   31.20
  -2   8  -1 1175.28   31.20
   2   8   1 1190.28   31.10
   2  -8   1 1212.98   31.20
  -2  -8  -1 1246.68   31.00
   2   8   2  175.08    6.80
   2   8   2  179.08    4.50
  -2   8  -2  165.78    6.70
  -2   8  -2  174.58    6.70
   2   8   2  174.58    4.50
  -2  -8  -2  166.08    6.40
   2  -8   2  166.98    6.80
  -2  -8  -2  167.88    7.20
  -2   8  -3 1165.18   30.00
  -2   8  -3 1136.49   29.60
   2   8   3 1151.98   30.00
   2   8   3 1130.19   27.50
   2  -8   3 1130.79   27.30
  -2  -8  -3 1120.99   30.40
   2  -8   3 1173.28   30.00
  -2  -8  -3 1166.48   29.30
  -2   8  -4    2.70    1.70
   2   8   4    6.40    1.10
   2   8   4    7.30    2.10
   2   8   4    5.80    1.10
  -2   8  -4    5.20    1.80
   2  -8   4    0.10    1.80
   2  -8   4    4.70    1.10
  -2  -8  -4    6.60    1.60
  -2  -8  -4    5.20    2.00
  -2   8  -5  760.92   20.70
   2   8   5  773.42   19.20
  -2   8  -5  772.62   21.20
  -2   8  -5  758.32   19.20
   2   8   5  756.52   21.30
   2   8   5  744.63   19.10
  -2  -8  -5  778.52   20.10
  -2  -8  -5  764.72   21.90
   2  -8   5  754.02   21.20
   2  -8   5  782.72   19.30
   2   8   6    7.70    1.60
  -2   8  -6    4.50    1.60
   2   8   6    4.70    2.10
   2   8   6    5.80    1.60
  -2   8  -6    4.90    2.00
   2   8   6    3.20    2.00
  -2   8  -6    1.90    1.70
  -2  -8  -6    8.60    2.50
   2  -8   6    5.30    1.50
  -2  -8  -6    4.30    1.60
   2  -8   6    5.50    2.20
   2   8   7  611.94   18.20
  -2   8  -7  569.14   16.30
  -2   8  -7  650.43   18.20
   2   8   7  628.74   16.30
   2   8   7  589.84   16.40
  -2   8  -7  620.74   17.40
   2   8   7  593.54   16.20
   2  -8   7  621.04   16.40
   2  -8   7  631.64   17.90
  -2  -8  -7  621.34   18.70
  -2  -8  -7  622.14   16.30
  -2   8  -8   35.50    4.10
   2   8   8   33.10    3.10
  -2   8  -8   32.90    3.60
   2   8   8   32.60    4.00
   2   8   8   31.00    3.90
   2  -8   8   40.30    3.30
  -2  -8  -8   29.90    2.80
  -2  -8  -8   25.70    3.90
   2  -8   8   26.40    3.90
   2   8   9  513.75   14.80
  -2   8  -9  510.35   15.40
   2   8   9  540.45   16.60
  -2   8  -9  535.25   16.40
  -2  -8  -9  538.05   17.20
   2  -8   9  513.15   14.90
   2  -8   9  507.55   15.80
   2   8  10   13.60    2.60
   2   8  10   14.20    3.70
  -2   8 -10   17.00    3.00
  -2   8 -10   14.50    3.10
   2  -8  10   19.30    3.40
  -2  -8 -10   15.50    3.60
   2  -8  10   17.40    2.60
   2   8  11  173.48    8.50
  -2   8 -11  184.98    8.50
  -2   8 -11  165.08    7.60
   2   8  11  167.48    7.30
  -2  -8 -11  185.48    9.10
   2  -8  11  178.48    7.90
   2  -8  11  182.88    7.50
  -2   8 -12    9.30    4.10
   2   8  12    5.30    3.30
   2   8  12   10.90    3.00
  -2   8 -12    7.00    3.00
  -2  -8 -12   11.50    3.80
   2  -8  12    9.50    3.10
   2  -8  12    9.50    3.00
  -2   8 -13  113.89    7.70
  -2   8 -13   96.19    6.70
   2   8  13   93.89    7.40
   2   8  13  103.09    6.50
   2  -8  13   93.29    7.60
   2  -8  13  106.99    6.90
  -2  -8 -13  110.79    7.90
  -2   8 -14   -2.70    3.60
   2   8  14    3.00    3.80
   2   8  14    5.40    3.50
  -2   8 -14   -1.30    3.70
  -2  -8 -14   -1.10    4.20
   2  -8  14    3.70    3.50
   2  -8  14    3.30    3.40
  -2   8 -15   70.59    7.90
   2   8  15   58.59    7.00
   2   8  15   53.59    6.50
  -2  -8 -15   48.90    7.00
   2  -8  15   54.19    6.70
   2  -8  15   40.80    5.40
   2   9 -15    7.80    4.70
  -2   9  15    3.50    4.20
  -2  -9  15   14.40    4.40
  -2  -9  15   15.30    4.30
   2  -9 -15    3.20    4.60
   2   9 -14    7.40    4.50
  -2   9  14    6.70    4.10
  -2   9  14    6.70    3.40
  -2  -9  14   -0.10    3.70
   2  -9 -14    8.90    4.70
  -2  -9  14    5.50    3.60
  -2   9  13   12.90    3.30
  -2   9  13   14.50    4.00
   2   9 -13   13.10    4.30
   2  -9 -13   16.00    4.50
  -2  -9  13   12.00    3.20
  -2  -9  13   11.30    3.50
  -2   9  12    2.20    3.10
   2   9 -12    5.00    2.70
  -2   9  12    0.10    2.40
   2   9 -12    4.60    3.60
  -2  -9  12    4.20    3.10
  -2  -9  12    4.10    2.70
   2  -9 -12    4.20    3.80
   2   9 -11   35.00    4.60
   2   9 -11   38.50    4.20
  -2   9  11   24.10    4.00
  -2   9  11   41.00    3.90
  -2  -9  11   40.20    7.30
   2  -9 -11   44.10    5.50
  -2  -9  11   39.30    4.30
   2   9 -10   16.90    2.70
   2   9 -10   10.30    3.60
  -2   9  10   16.30    2.40
  -2   9  10   13.40    3.40
  -2  -9  10   13.00    3.20
   2  -9 -10   16.10    2.30
   2  -9 -10   15.90    3.90
  -2  -9  10   10.80    2.50
  -2   9   9   -2.20    2.20
   2   9  -9    0.10    2.00
  -2   9   9    1.60    1.60
   2   9  -9   -1.30    2.40
  -2  -9   9   -4.50    2.10
  -2  -9   9    2.10    1.80
   2  -9  -9   -0.30    1.70
   2  -9  -9   -1.50    2.80
   2   9  -8    1.20    1.90
  -2   9   8   -4.50    2.10
   2   9  -8    2.80    2.50
   2  -9  -8    1.80    1.70
  -2  -9   8   -1.80    2.10
   2  -9  -8    1.00    2.30
  -2  -9   8    2.00    1.70
  -2   9   7    4.00    1.10
   2   9  -7    3.20    2.90
  -2   9   7    3.20    2.30
   2   9  -7    1.10    2.20
  -2   9   7    3.60    1.50
   2   9  -7    2.60    1.90
  -2  -9   7    2.00    1.40
  -2  -9   7    1.20    2.00
   2  -9  -7   -0.10    2.20
   2  -9  -7   -0.60    1.70
  -2   9   6    4.20    0.70
   2   9  -6    4.60    1.60
   2   9  -6    4.60    2.20
  -2   9   6    4.10    0.80
   2   9  -6    4.70    1.90
  -2   9   6    9.00    2.50
  -2  -9   6    1.80    2.00
   2  -9  -6   -0.20    2.10
   2  -9  -6    5.70    1.80
   2   9  -5    6.00    1.40
   2   9  -5    7.10    1.90
  -2   9   5    4.70    2.30
   2   9  -5    5.70    2.30
  -2  -9   5    4.60    1.10
   2  -9  -5    2.60    1.90
   2  -9  -5    0.40    2.20
  -2  -9   5    3.00    2.00
   2   9  -4    8.40    1.20
  -2   9   4    3.70    2.00
   2   9  -4    9.10    2.00
   2   9  -4    7.60    2.30
  -2  -9   4    7.60    1.10
   2  -9  -4    6.80    2.00
   2  -9  -4    7.90    2.40
  -2  -9   4    6.30    2.30
   2   9  -3   28.30    1.40
   2   9  -3   24.90    2.80
   2   9  -3   32.80    3.60
  -2   9   3   26.10    3.30
  -2  -9   3   24.50    3.00
   2  -9  -3   28.70    3.70
  -2  -9   3   29.60    1.40
   2  -9  -3   30.90    3.00
   2   9  -2  163.48    6.50
  -2   9   2  161.08    7.00
   2   9  -2  161.88    7.00
   2  -9  -2  161.38    6.60
  -2  -9   2  160.28    6.80
  -2   9   1   -1.40    1.80
   2   9  -1    3.80    1.90
   2   9  -1   -0.50    1.60
  -2  -9   1    1.50    1.60
   2  -9  -1   -0.10    1.70
   2   9   0   22.30    2.90
  -2   9   0   18.50    2.70
   2  -9   0   17.30    2.50
  -2  -9   0   19.20    2.70
   2   9   1    0.30    1.80
  -2   9  -1    2.10    2.00
  -2   9  -1    1.50    1.60
   2  -9   1    3.20    1.80
  -2  -9  -1    5.90    1.80
  -2   9  -2  159.68    6.70
  -2   9  -2  160.28    6.70
   2   9   2  161.48    6.80
   2  -9   2  158.68    6.70
  -2  -9  -2  154.08    6.30
   2   9   3  139.09    3.90
   2   9   3  154.28    3.80
  -2   9  -3  160.68    6.50
  -2   9  -3  148.99    6.60
   2   9   3  158.28    6.80
  -2  -9  -3  144.39    7.10
  -2  -9  -3  149.39    6.00
   2  -9   3  144.49    6.60
   2   9   4   12.90    1.40
  -2   9  -4   13.00    2.60
   2   9   4   12.10    2.60
  -2   9  -4    7.30    2.20
   2  -9   4   12.40    1.40
  -2  -9  -4    9.30    2.10
  -2  -9  -4   14.50    3.00
   2  -9   4   11.60    2.50
   2   9   5    0.40    1.20
   2   9   5    0.90    1.00
   2   9   5   -2.00    1.80
  -2   9  -5   -1.50    1.90
  -2   9  -5   -1.70    1.80
  -2  -9  -5    0.90    2.20
  -2  -9  -5    0.30    1.50
   2  -9   5    0.50    1.00
   2  -9   5    0.50    1.90
  -2   9  -6  112.79    5.80
   2   9   6  106.89    5.30
   2   9   6  122.69    6.40
  -2   9  -6  115.69    6.00
   2   9   6  119.59    4.50
   2  -9   6  119.89    6.10
  -2  -9  -6  121.19    6.70
   2  -9   6  118.99    6.00
  -2  -9  -6  123.89    5.20
   2   9   7   11.10    2.80
  -2   9  -7   10.20    2.70
   2   9   7   10.70    1.90
  -2   9  -7   12.50    2.60
  -2  -9  -7    8.40    3.10
   2  -9   7   14.20    2.10
   2  -9   7   10.30    2.80
  -2  -9  -7    9.20    2.10
  -2   9  -8   95.69    6.00
  -2   9  -8  104.69    5.80
   2   9   8  109.99    6.50
   2   9   8  100.69    4.70
  -2  -9  -8  101.89    6.70
  -2  -9  -8  111.49    4.80
   2  -9   8  106.39    4.90
   2  -9   8  101.39    6.00
  -2   9  -9   23.00    3.80
  -2   9  -9   18.70    3.10
   2   9   9   18.50    3.90
   2   9   9   20.40    2.70
   2  -9   9   19.00    2.70
  -2  -9  -9   23.60    3.00
   2  -9   9   22.30    3.60
  -2  -9  -9   19.70    3.80
   2   9  10   59.39    5.70
   2   9  10   65.09    4.60
  -2   9 -10   68.99    5.60
  -2   9 -10   65.89    5.50
  -2  -9 -10   61.79    6.60
   2  -9  10   68.79    4.80
  -2   9 -11   28.20    4.20
   2   9  11   23.30    4.30
   2   9  11   27.00    3.50
  -2   9 -11   27.30    3.90
   2  -9  11   21.50    3.90
  -2  -9 -11   32.60    4.70
   2  -9  11   21.30    3.40
   2   9  12  138.09    7.20
   2   9  12  129.69    8.30
  -2   9 -12  144.29    8.50
  -2   9 -12  148.69    7.90
   2  -9  12  142.29    8.20
  -2  -9 -12  136.89    8.90
   2  -9  12  141.79    7.40
   2   9  13   12.60    4.30
  -2   9 -13   16.90    4.10
   2   9  13    3.90    3.30
  -2   9 -13    1.20    4.00
  -2  -9 -13    1.80    4.60
   2  -9  13    9.30    3.90
   2   9  14   63.69    7.50
   2   9  14   37.80    5.00
  -2   9 -14   43.90    6.00
   2  -9  14   43.00    5.50
   2  -9  14   51.69    6.60
  -2  -9 -14   48.10    6.50
   2  10 -14   71.79    8.00
  -2  10  14   61.99    7.10
  -2 -10  14   68.29    7.00
   2 -10 -14   58.49    7.60
  -2 -10  14   78.29    7.80
   2  10 -13   89.59    8.80
  -2  10  13   83.19    8.10
   2 -10 -13   98.79    8.60
  -2 -10  13   95.79    7.70
  -2  10  12  194.88    9.90
   2  10 -12  195.68   10.40
   2 -10 -12  178.18   10.30
  -2 -10  12  189.88    8.10
  -2 -10  12  197.38    9.40
   2  10 -11   91.69    6.20
  -2  10  11   94.99    7.10
   2  10 -11  105.69    7.50
  -2 -10  11  103.09    5.80
   2 -10 -11  109.79    7.80
  -2 -10  11   94.89    6.70
   2  10 -10  140.59    8.10
   2  10 -10  142.49    6.60
  -2  10  10  143.49    8.40
  -2 -10  10  149.69    7.80
  -2 -10  10  138.39    6.20
   2 -10 -10  151.88    9.10
   2 -10 -10  141.79    6.10
   2  10  -9  110.69    7.20
  -2  10   9  116.49    7.20
   2  10  -9  124.79    6.00
   2 -10  -9  106.69    7.40
  -2 -10   9  120.59    5.40
  -2 -10   9  115.59    7.10
   2 -10  -9  131.99    5.80
   2  10  -8  235.58   14.00
  -2  10   8  268.57   10.70
   2  10  -8  258.57    9.00
  -2 -10   8  259.27    8.20
   2 -10  -8  244.88   11.10
   2 -10  -8  264.97    9.00
   2  10  -7  148.59    6.40
   2  10  -7  150.98    7.60
  -2  10   7  142.99    7.50
   2 -10  -7  154.48    8.30
   2 -10  -7  151.38    6.40
  -2 -10   7  146.59    7.30
  -2 -10   7  147.59    5.30
   2  10  -6  547.05   15.90
  -2  10   6  561.34   17.40
   2  10  -6  539.15   17.30
  -2 -10   6  531.15   14.30
   2 -10  -6  566.74   16.10
   2 -10  -6  551.84   17.70
  -2 -10   6  587.74   17.30
  -2  10   5  432.66   14.30
   2  10  -5  423.46   13.00
   2  10  -5  443.96   14.50
  -2 -10   5  437.36   14.10
   2 -10  -5  423.36   14.60
   2 -10  -5  427.46   13.10
  -2 -10   5  424.56   11.00
   2  10  -4  526.05   15.60
  -2  10   4  560.54   16.90
   2  10  -4  546.25   16.90
   2  10  -4  536.25   13.10
  -2 -10   4  538.55   13.00
  -2 -10   4  528.35   16.40
   2 -10  -4  543.65   17.20
   2 -10  -4  529.85   15.80
   2  10  -3  229.18    8.40
   2  10  -3  221.38    9.00
  -2  10   3  233.88    9.20
  -2 -10   3  229.48    8.80
   2 -10  -3  210.68    8.30
  -2  10   2  454.85   14.60
   2  10  -2  467.15   14.80
   2  10  -2  449.36   14.00
  -2 -10   2  472.95   14.50
   2 -10  -2  462.55   14.20
   2  10  -1  305.87   10.90
  -2  10   1  305.97   10.90
   2  10  -1  305.37   10.30
  -2 -10   1  290.57   10.40
   2 -10  -1  303.27   10.60
   2  10   0  482.75   15.50
  -2  10   0  494.95   15.40
   2  10   0  508.45   15.20
  -2  10   0  508.15   15.40
   2 -10   0  498.45   15.20
  -2 -10   0  502.05   15.10
   2  10   1  123.59    6.20
  -2  10  -1  107.59    6.10
  -2  10  -1  102.39    5.70
   2 -10   1  110.09    5.90
  -2 -10  -1  117.59    5.90
   2  10   2  547.85   16.50
  -2  10  -2  533.95   16.30
  -2  10  -2  544.05   16.50
   2 -10   2  551.04   16.60
  -2 -10  -2  547.75   16.10
  -2  10  -3  205.68    8.40
   2  10   3  190.78    8.30
  -2  10  -3  204.08    8.20
  -2 -10  -3  210.58    8.00
   2 -10   3  205.98    8.40
   2  10   4  392.86   13.20
  -2  10  -4  397.56   13.10
  -2  10  -4  373.36   12.50
   2 -10   4  381.06   13.00
  -2 -10  -4  414.96   14.10
  -2 -10  -4  396.26   12.20
   2  10   5  218.48    9.10
  -2  10  -5  221.18    8.60
  -2  10  -5  218.78    9.10
   2  10   5  223.58    5.80
  -2 -10  -5  208.88    9.60
   2 -10   5  214.28    8.90
  -2 -10  -5  213.88    7.90
   2 -10   5  219.48    6.00
   2  10   6  349.57   12.20
  -2  10  -6  326.67   11.30
  -2  10  -6  342.27   12.10
   2  10   6  333.27    9.00
   2 -10   6  328.87    9.20
   2 -10   6  338.27   12.00
  -2 -10  -6  331.37   10.60
  -2 -10  -6  316.57   12.40
  -2  10  -7  100.69    5.90
  -2  10  -7  102.19    6.30
   2 -10   7   99.09    4.40
  -2 -10  -7   94.59    6.90
  -2 -10  -7  106.09    5.30
   2  10   8  159.38    8.20
   2  10   8  155.28    6.00
  -2  10  -8  161.98    7.50
  -2  10  -8  164.78    8.30
  -2 -10  -8  157.88    8.60
   2 -10   8  169.78    8.00
  -2 -10  -8  169.48    6.50
   2 -10   8  153.68    6.00
   2  10   9   58.69    5.80
   2  10   9   53.89    4.30
  -2  10  -9   52.79    5.30
  -2  10  -9   53.19    5.40
   2 -10   9   51.59    4.30
  -2 -10  -9   61.89    6.80
  -2 -10  -9   62.89    4.70
   2 -10   9   51.79    5.40
  -2  10 -10   55.89    5.60
   2  10  10   58.09    6.00
  -2  10 -10   69.59    6.60
  -2 -10 -10   54.89    6.40
   2 -10  10   66.39    6.00
   2 -10  10   49.50    4.70
  -2  10 -11   89.29    6.80
  -2  10 -11   77.49    7.40
   2  10  11   76.99    7.00
   2 -10  11   85.69    6.70
   2 -10  11   86.19    5.90
  -2 -10 -11   81.29    8.20
  -2  10 -12   81.89    7.80
   2  10  12   71.39    7.90
  -2  10 -12   80.19    6.80
  -2 -10 -12   73.99    7.70
   2 -10  12   89.69    7.60
  -2  10 -13   27.40    5.70
   2  10  13   17.30    5.10
  -2 -10 -13   31.90    6.20
   2 -10  13   32.30    5.00
   2  11 -13   -9.80    5.00
  -2  11  13    3.30    4.80
  -2 -11  13    2.20    4.30
   2 -11 -13   -4.90    5.00
  -2  11  12    7.40    4.40
   2  11 -12    3.70    4.40
  -2 -11  12    6.50    4.10
   2 -11 -12    5.30    4.80
   2  11 -11   16.30    4.60
  -2  11  11   20.30    4.70
  -2 -11  11   13.70    4.20
   2 -11 -11   26.40    5.70
   2  11 -10   13.00    4.10
  -2  11  10   10.90    4.00
   2 -11 -10   11.20    4.30
  -2 -11  10    2.20    3.50
   2  11  -9   -3.80    2.70
  -2  11   9    1.10    3.20
   2  11  -9    0.90    3.30
   2 -11  -9   -2.20    2.60
  -2 -11   9   -3.30    3.10
   2 -11  -9   -1.70    3.60
   2  11  -8   25.40    3.60
   2  11  -8   24.70    4.30
  -2  11   8   38.10    4.80
   2 -11  -8   26.00    3.40
  -2 -11   8   26.10    4.20
   2 -11  -8   29.90    5.10
   2  11  -7   -0.20    2.90
   2  11  -7   -0.40    2.40
  -2  11   7    0.70    2.90
   2 -11  -7   -1.90    3.00
  -2 -11   7    7.50    3.20
   2 -11  -7    1.80    2.50
   2  11  -6   15.60    3.00
   2  11  -6   10.90    3.40
  -2  11   6   14.10    3.40
  -2 -11   6   21.80    3.60
   2 -11  -6   19.00    3.20
   2 -11  -6   13.90    3.50
   2  11  -5   19.40    3.10
  -2 -11   5   16.30    3.30
   2 -11  -5   19.30    3.10
   2  11  -4    7.50    2.90
  -2  11   4    7.30    3.00
   2  11  -4    7.40    2.50
   2 -11  -4    6.00    2.40
   2  11  -3    6.70    2.80
   2  11  -3    7.50    2.70
  -2  11   3   11.00    3.10
  -2 -11   3    9.30    2.90
   2 -11  -3    6.30    2.50
   2  11  -2   -5.80    2.20
  -2  11   2    0.40    2.60
   2  11  -2    1.90    2.40
  -2 -11   2    0.20    2.30
   2 -11  -2    2.70    2.20
  -2  11   1    7.00    2.80
   2  11  -1   12.20    3.00
  -2 -11   1   13.30    2.80
   2 -11  -1    9.70    2.70
   2  11   0   47.80    4.70
   2  11   0   46.00    4.70
  -2  11   0   50.09    5.00
  -2  11   0   51.79    4.70
  -2 -11   0   55.89    4.60
   2 -11   0   56.99    4.70
  -2  11  -1   12.30    2.80
  -2  11  -1    8.80    2.60
   2  11   1    9.20    2.70
  -2 -11  -1    7.50    2.50
   2 -11   1    3.90    2.50
   2  11   2    6.40    2.90
  -2  11  -2   -0.30    2.30
  -2  11  -2    7.00    2.70
  -2 -11  -2    4.40    2.40
   2 -11   2    5.90    2.70
   2  11   3   54.19    5.40
  -2  11  -3   59.89    5.00
  -2  11  -3   57.79    5.10
  -2 -11  -3   60.09    4.70
  -2  11  -4   44.00    4.80
  -2  11  -4   54.29    5.30
   2  11   4   44.20    5.00
   2 -11   4   50.19    4.90
  -2 -11  -4   53.79    4.50
  -2  11  -5   37.10    4.60
  -2  11  -5   51.39    4.90
   2  11   5   36.90    5.40
  -2 -11  -5   26.80    4.60
   2 -11   5   35.70    4.40
  -2 -11  -5   37.90    4.30
   2  11   6   73.09    6.00
  -2  11  -6   61.49    5.40
  -2 -11  -6   65.49    5.00
  -2 -11  -6   78.89    7.10
   2 -11   6   69.39    6.10
   2  11   7   28.30    4.30
  -2  11  -7   40.80    5.20
  -2  11  -7   35.80    4.60
  -2 -11  -7   28.80    4.70
   2 -11   7   34.50    4.60
  -2 -11  -7   28.00    3.40
  -2  11  -8   42.50    4.90
  -2  11  -8   45.50    5.50
   2  11   8   54.79    6.00
  -2 -11  -8   51.39    6.30
  -2 -11  -8   52.69    4.60
   2 -11   8   51.29    5.60
   2  11   9  116.29    7.90
  -2  11  -9  104.99    7.20
  -2  11  -9  114.49    8.00
  -2 -11  -9  116.69    8.90
   2 -11   9  118.49    8.10
  -2  11 -10   69.79    6.60
  -2  11 -10   70.69    7.40
   2  11  10   72.99    7.10
   2 -11  10   77.69    7.30
  -2 -11 -10   76.09    7.80
   2  11  11   25.60    5.40
  -2  11 -11   18.50    5.10
  -2 -11 -11   28.60    5.60
   2 -11  11   20.80    4.90
  -2  11 -12   37.80    6.10
   2  11  12   29.50    5.80
   2 -11  12   37.50    5.90
  -2 -11 -12   30.30    6.20
  -2  12  11   20.40    5.20
   2  12 -11   13.80    5.40
   2 -12 -11   21.60    6.00
  -2 -12  11   25.10    5.20
  -2  12  10  150.08    9.50
   2  12 -10  155.68    9.70
   2 -12 -10  156.88   10.10
  -2 -12  10  139.69    9.50
   2  12  -9   44.00    5.80
  -2  12   9   47.80    5.90
   2 -12  -9   51.79    6.40
  -2 -12   9   58.99    6.50
   2  12  -8  308.07   13.00
   2  12  -8  291.07   10.80
  -2  12   8  298.67   12.80
   2 -12  -8  281.47   13.20
   2 -12  -8  287.17   10.70
  -2 -12   8  295.27   12.30
  -2  12   7   10.60    3.70
   2  12  -7   13.90    3.50
   2  12  -7   15.50    4.40
   2 -12  -7   13.70    4.40
  -2 -12   7   13.10    4.10
   2 -12  -7    3.50    3.20
  -2  12   6  192.08    9.70
   2  12  -6  204.48    9.80
   2  12  -6  203.38    8.80
   2 -12  -6  196.28   10.20
  -2 -12   6  213.68   10.10
   2 -12  -6  211.18    8.90
   2  12  -5   61.59    5.60
  -2  12   5   77.89    6.40
   2  12  -5   65.69    6.30
  -2 -12   5   65.09    6.00
   2 -12  -5   81.19    5.50
  -2  12   4  279.87   11.60
   2  12  -4  249.28   10.00
   2  12  -4  260.37   11.10
  -2 -12   4  263.17   10.90
   2 -12  -4  275.37   10.50
   2  12  -3   52.89    5.30
   2  12  -3   52.69    5.60
  -2  12   3   55.09    5.80
  -2 -12   3   47.50    5.20
   2  12  -2  266.97   11.40
   2  12  -2  265.57   10.40
  -2  12   2  279.77   11.00
  -2 -12   2  274.27   11.00
   2 -12  -2  258.87   11.70
   2  12  -1  118.29    7.30
   2  12  -1  132.39    7.20
  -2  12   1  128.29    7.60
  -2 -12   1  123.39    7.30
   2 -12  -1  122.09    7.20
   2  12   0  279.97   10.80
   2  12   0  278.97   11.40
  -2  12   0  284.57   11.40
  -2 -12   0  283.57   10.80
   2 -12   0  286.77   11.20
   2  12   1   48.30    5.50
   2  12   1   47.60    5.40
  -2  12  -1   45.90    5.60
  -2  12  -1   53.59    5.40
   2 -12   1   50.39    5.20
  -2  12  -2  313.77   12.00
  -2  12  -2  304.37   11.70
  -2 -12  -2  313.27   12.70
  -2  12  -3   81.59    5.90
  -2  12  -3   85.89    6.60
   2  12   3   73.99    6.60
   2 -12   3   77.79    6.10
  -2 -12  -3   82.99    5.60
   2  12   4  187.58    9.30
  -2  12  -4  204.88    9.30
  -2  12  -4  185.18    9.60
  -2 -12  -4  208.78    8.70
   2 -12   4  199.98    9.50
  -2  12  -5   37.40    4.60
   2  12   5   40.90    5.20
  -2  12  -5   46.20    5.40
   2 -12   5   47.80    6.00
  -2 -12  -5   47.90    5.20
  -2  12  -6  226.88   10.40
  -2  12  -6  217.88   10.00
   2  12   6  220.38   10.30
  -2 -12  -6  225.08    9.10
   2 -12   6  216.28   10.10
   2  12   7   14.60    4.40
  -2  12  -7    8.30    3.70
  -2 -12  -7    1.40    3.00
  -2 -12  -7    6.30    4.20
   2 -12   7   13.80    4.10
   2  12   8   50.69    5.90
  -2  12  -8   68.59    6.80
  -2  12  -8   50.69    6.10
   2 -12   8   58.99    6.40
  -2 -12  -8   53.89    6.60
   2  12   9   24.10    5.00
  -2  12  -9   27.50    4.80
  -2  12  -9   18.00    4.70
   2 -12   9   30.70    5.10
  -2 -12  -9   28.20    5.90
  -2  12 -10   95.59    8.40
  -2  12 -10  112.69    9.60
   2  12  10   92.69    8.50
  -2 -12 -10  101.69    9.30
   2 -12  10  103.19    8.30
   2  13  -9   10.30    5.20
  -2  13   9   -1.60    4.70
  -2 -13   9    9.00    4.70
  -2  13   8   -1.10    4.40
   2  13  -8    1.30    4.30
   2 -13  -8    5.60    4.00
   2 -13  -8    4.80    5.30
  -2 -13   8    7.30    4.40
   2  13  -7   -2.50    3.80
  -2  13   7    5.00    4.40
   2  13  -7   -0.50    4.00
  -2 -13   7   -1.70    3.90
   2 -13  -7   -3.40    3.70
  -2  13   6   -4.30    3.80
   2  13  -6    5.50    4.30
   2  13  -6    2.20    3.70
   2 -13  -6   -0.80    3.70
  -2 -13   6    2.60    3.80
   2  13  -5   -2.30    3.60
  -2  13   5    7.70    4.10
   2  13  -5    4.20    3.50
   2 -13  -5   -2.70    3.30
  -2 -13   5   -4.50    3.90
   2  13  -4   -0.10    3.50
   2  13  -4   -7.30    3.20
  -2  13   4   -6.60    3.70
  -2 -13   4    0.80    3.40
   2 -13  -4   -1.50    3.10
   2  13  -3    1.30    3.40
  -2  13   3   -7.70    3.30
   2 -13  -3    0.80    3.30
  -2 -13   3    2.20    3.70
   2  13  -2    6.70    3.90
  -2  13   2    3.40    3.50
  -2  13   2    1.60    3.70
   2  13  -2    2.60    3.80
   2 -13  -2    1.00    3.30
  -2 -13   2   -0.20    3.50
   2  13  -1   12.70    3.90
  -2  13   1    9.60    3.80
   2  13  -1   13.40    3.80
  -2  13   1   16.70    4.20
  -2 -13   1   13.90    4.20
   2 -13  -1    7.90    3.80
  -2  13   0   11.30    3.90
  -2  13   0    5.80    3.60
   2  13   0    8.70    3.70
   2  13   0   10.40    3.60
   2 -13   0    6.60    3.60
  -2 -13   0    9.50    3.50
  -2  13  -1   10.50    4.10
   2  13   1   12.40    4.20
  -2  13  -1   12.40    3.90
   2  13   1    5.80    4.00
  -2 -13  -1    6.10    3.60
   2 -13   1    9.00    4.00
   2  13   2   -5.20    3.60
   2  13   2    1.90    3.70
  -2  13  -2   -1.80    3.60
  -2  13  -2    0.80    3.50
  -2 -13  -2    0.70    3.20
   2 -13   2   -3.30    3.20
  -2  13  -3   48.90    5.90
  -2  13  -3   46.00    5.40
   2  13   3   48.70    6.10
   2 -13   3   27.10    5.00
  -2 -13  -3   35.80    4.50
  -2  13  -4    8.10    4.00
   2  13   4   20.00    4.70
  -2  13  -4   13.80    4.30
  -2 -13  -4   10.90    3.70
   2 -13   4    8.30    3.90
  -2  13  -5   75.59    7.10
  -2  13  -5   75.09    7.80
   2  13   5   60.39    7.60
  -2 -13  -5   70.59    6.70
   2 -13   5   77.99    7.20
  -2  13  -6    0.10    3.80
   2  13   6    3.10    4.50
  -2  13  -6    5.20    4.20
  -2 -13  -6    3.30    3.80
   2 -13   6    1.70    4.20
   2  13   7   69.89    7.70
  -2  13  -7   75.59    8.30
  -2  13  -7   74.89    7.40
   2 -13   7   67.49    7.40
  -2  13  -8    0.80    4.70
   2  13   8    2.80    4.50
  -2  13  -8   -3.40    4.50
   2 -13   8    2.50    5.60
   2  14  -5  160.28    9.60
  -2  14   5  159.58   10.10
   2 -14  -5  166.88    9.50
  -2 -14   5  166.38   10.60
   2  14  -4    0.40    4.20
   2  14  -4   -3.50    4.30
  -2  14   4  -12.60    4.50
   2 -14  -4    1.90    4.10
  -2 -14   4    6.30    4.40
   2  14  -3  172.58    9.50
  -2  14   3  152.68    9.80
   2  14  -3  159.38   10.70
  -2  14   3  166.78   10.80
   2 -14  -3  173.48    9.60
  -2 -14   3  160.88    9.90
   2  14  -2    4.20    4.40
  -2  14   2   -0.80    4.00
  -2  14   2   -1.80    4.70
   2  14  -2    2.50    4.30
   2 -14  -2    7.70    4.40
  -2 -14   2    1.10    4.90
  -2  14   1  244.78   12.10
   2  14  -1  245.78   11.50
  -2  14   1  250.77   11.70
   2  14  -1  238.58   11.80
  -2 -14   1  254.97   11.60
   2 -14  -1  240.08   11.50
   2  14   0    2.70    4.10
  -2  14   0    5.90    4.60
   2  14   0   -4.50    4.20
  -2  14   0    0.60    4.00
  -2 -14   0    1.00    3.80
   2 -14   0    3.10    4.10
   2  14   1  189.68   10.00
  -2  14  -1  182.48    9.90
   2  14   1  173.68   10.20
  -2  14  -1  178.98   10.70
  -2 -14  -1  176.68    9.90
   2 -14   1  185.48    9.90
   2  14   2   -6.50    4.40
  -2  14  -2    2.80    4.20
   2  14   2   -2.00    4.20
  -2  14  -2    1.50    4.50
  -2 -14  -2    7.20    4.20
   2 -14   2   -0.60    4.60
   2  14   3  116.19    9.20
  -2  14  -3  104.09    8.80
   2  14   3  115.19    8.90
  -2  14  -3  111.79    9.30
   2 -14   3  112.39    8.60
  -2 -14  -3  103.19    8.40
   2  14   4   12.40    4.80
  -2  14  -4    2.10    4.60
  -2  14  -4   13.50    5.00
  -2 -14  -4    7.60    4.40
   2 -14   4    8.70    5.00
  -3   0  19    3.40    4.30
  -3   0  19   -6.70    5.00
   3   0 -19    4.40    4.90
  -3   0  18    3.70    3.60
  -3   0  18    2.50    3.10
   3   0 -18   13.30    4.50
  -3   0  17    7.50    3.20
   3   0 -17    1.70    3.40
  -3   0  17   -0.50    2.60
  -3   0  16   46.80    5.00
   3   0 -16   48.20    5.40
  -3   0  16   49.00    4.40
   3   0 -15   -1.60    2.50
  -3   0  15   -0.30    1.90
  -3   0  15   -2.30    2.30
   3   0 -14    0.00    0.90
   3   0 -14    0.30    1.10
  -3   0  14    0.50    2.20
   3   0 -14    1.80    2.30
   3   0 -13   -1.10    0.90
   3   0 -13    0.70    2.00
  -3   0  13    0.60    1.80
   3   0 -13   -1.70    1.10
  -3   0  12   29.80    3.30
  -3   0  12   31.30    3.30
   3   0 -12   31.20    2.00
   3   0 -12   35.70    3.60
   3   0 -12   33.10    2.10
  -3   0  11   -0.20    1.60
   3   0 -11    0.50    0.90
   3   0 -11   -1.20    1.50
  -3   0  11   -1.90    1.40
   3   0 -11   -0.60    0.80
  -3   0  10    1.40    1.40
   3   0 -10    2.60    0.80
  -3   0  10    3.60    1.50
   3   0 -10    4.40    1.50
   3   0 -10    3.60    0.90
  -3   0   9   -0.70    1.00
   3   0  -9   -0.20    0.70
  -3   0   9   -2.90    1.00
   3   0  -9   -2.30    1.10
   3   0  -9   -1.30    0.70
  -3   0   8   55.09    3.10
   3   0  -8   59.09    2.30
   3   0  -8   57.99    3.30
  -3   0   8   58.79    3.30
   3   0  -8   55.89    3.20
   3   0  -8   61.09    2.30
  -3   0   8   60.79    2.80
   3   0  -7   -3.00    0.80
  -3   0   7   -1.90    0.70
   3   0  -7   -0.40    0.90
  -3   0   7   -1.10    1.10
  -3   0   7   -0.90    0.90
   3   0  -7   -0.60    0.60
  -3   0   6    4.20    0.90
   3   0  -6    5.20    1.20
  -3   0   6    1.80    1.00
  -3   0   6    7.30    1.30
   3   0  -6    4.50    0.80
   3   0  -6    4.20    1.20
  -3   0   5   -2.70    0.60
  -3   0   5   -2.60    0.40
   3   0  -5   -2.20    0.60
  -3   0   5   -2.30    0.40
   3   0  -5   -1.50    0.70
  -3   0   5   -1.40    0.70
   3   0  -4   42.10    1.80
   3   0  -4   42.80    2.10
   3   0  -4   41.20    1.80
   3   0  -4   40.00    2.00
  -3   0   4   43.60    2.10
  -3   0   4   40.80    1.60
  -3   0   4   43.10    2.10
   3   0  -3   -3.80    0.40
   3   0  -3   -4.20    0.40
   3   0  -3   -4.30    0.30
  -3   0   3   -4.10    0.20
   3   0  -3   -3.90    0.30
  -3   0   3   -4.20    0.40
   3   0  -2    5.00    0.70
   3   0  -2    3.80    0.70
  -3   0   2    4.80    0.70
  -3   0   2    4.60    0.70
   3   0  -2    4.40    0.50
  -3   0   2    4.80    0.60
  -3   0   2    4.20    0.70
   3   0  -2    4.50    0.70
   3   0  -1   -5.00    0.20
  -3   0   1   -5.00    0.20
  -3   0   1   -5.50    0.20
   3   0  -1   -5.40    0.20
  -3   0   1   -5.00    0.20
  -3   0   1   -4.60    0.30
   3   0  -1   -5.40    0.30
   3   0  -1   -4.60    0.30
   3   0   0   14.20    0.80
  -3   0   0   14.00    0.80
  -3   0   0   15.00    0.90
   3   0   0   15.00    0.90
   3   0   0   14.30    0.80
  -3   0   0   13.60    0.80
   3   0   0   13.20    0.50
   3   0   1   -3.50    0.30
   3   0   1   -3.20    0.40
  -3   0  -1   -3.60    0.30
  -3   0  -1   -3.50    0.20
  -3   0  -1   -3.50    0.30
   3   0   1   -3.50    0.20
   3   0   2   12.70    0.90
  -3   0  -2   10.70    1.00
   3   0   2    9.90    0.80
  -3   0  -2   11.70    0.80
  -3   0  -2   11.10    0.80
   3   0   2   12.60    1.10
   3   0   2   10.60    1.00
   3   0   3   -0.20    0.60
  -3   0  -3   -0.60    0.60
  -3   0  -3   -1.10    0.50
   3   0   3   -0.60    0.60
  -3   0  -3   -0.70    0.60
   3   0   3   -0.30    0.30
   3   0   3   -0.90    0.50
  -3   0  -3   -1.00    0.30
  -3   0  -4   90.79    2.60
  -3   0  -4   90.49    3.30
   3   0   4   86.59    3.30
  -3   0  -4   86.29    3.30
   3   0   4   90.09    3.10
   3   0   4   86.19    3.30
  -3   0  -4   81.69    3.10
   3   0   4   85.69    2.60
  -3   0  -5   -1.20    0.80
   3   0   5   -0.10    0.40
  -3   0  -5    0.00    0.70
  -3   0  -5   -0.90    0.80
   3   0   5   -0.40    0.80
  -3   0  -5   -0.70    0.40
   3   0   5   -2.00    0.80
   3   0   6  266.27    6.80
   3   0   6  264.67    8.00
  -3   0  -6  262.87    7.90
   3   0   6  258.57    8.00
  -3   0  -6  268.97    8.00
   3   0   6  268.97    7.90
  -3   0  -6  271.27    8.10
  -3   0  -6  270.07    6.80
  -3   0  -7    0.10    0.50
   3   0   7   -0.40    0.50
   3   0   7    1.10    1.20
  -3   0  -7   -1.10    1.20
   3   0   7   -0.70    0.90
  -3   0  -7    0.00    1.00
   3   0   7   -2.90    1.10
  -3   0  -7    0.50    1.00
  -3   0  -8    8.70    0.90
  -3   0  -8    8.80    1.70
   3   0   8    6.70    1.60
   3   0   8    8.90    0.90
   3   0   8    8.00    1.90
  -3   0  -8    7.10    1.50
   3   0   8    6.70    1.80
   3   0   9    0.60    0.50
  -3   0  -9    0.60    0.50
   3   0   9    1.10    1.40
  -3   0  -9    0.80    1.40
  -3   0  -9    0.80    1.30
   3   0  10   47.80    1.60
  -3   0 -10   47.70    3.80
  -3   0 -10   47.80    1.60
   3   0  10   50.99    3.90
  -3   0 -10   47.40    3.70
  -3   0 -11   -0.40    1.70
  -3   0 -11   -0.60    1.60
   3   0  11    0.20    1.70
  -3   0 -12   97.79    5.40
  -3   0 -12   93.59    5.50
   3   0  12   97.89    5.70
  -3   0 -13    1.60    2.20
  -3   0 -13   -2.90    2.20
   3   0  13    0.40    2.20
   3   0  14   12.10    3.00
  -3   0 -14    8.30    3.00
  -3   0 -14   13.40    3.30
   3   0  15    1.20    2.80
  -3   0 -15   -1.10    2.60
  -3   0 -15   -0.70    3.20
   3   0  16   16.60    4.10
  -3   0 -16   22.00    4.50
   3   0  17    0.50    3.70
  -3   0 -17    1.00    4.10
   3   0  18   23.30    5.00
  -3   0 -18   24.60    5.50
   3   1 -19  139.89   10.40
  -3   1  19  138.39    8.80
  -3   1  19  136.89    8.10
  -3  -1  19  131.39    8.90
   3  -1 -19  129.19   10.10
   3   1 -18   32.50    5.70
  -3   1  18   44.20    4.70
  -3   1  18   38.50    5.20
  -3  -1  18   35.40    4.20
   3  -1 -18   38.10    5.70
  -3  -1  18   35.70    5.00
  -3   1  17  117.09    6.60
  -3   1  17  129.39    7.80
   3   1 -17  122.79    8.40
  -3  -1  17  125.49    7.80
  -3  -1  17  123.69    6.40
   3  -1 -17  127.89    8.20
  -3   1  16  119.89    6.90
   3   1 -16  114.89    7.40
  -3   1  16  121.59    6.30
   3  -1 -16  122.79    7.50
  -3  -1  16  122.29    7.00
  -3   1  15  112.79    6.40
  -3   1  15  123.49    5.90
   3   1 -15  115.49    4.20
   3   1 -15  121.69    7.00
   3  -1 -15  109.19    6.80
  -3  -1  15  119.59    6.50
  -3   1  14   36.90    3.30
  -3   1  14   42.50    4.10
   3   1 -14   41.70    2.60
   3   1 -14   33.50    4.20
  -3  -1  14   40.10    4.10
   3  -1 -14   36.90    4.30
   3   1 -13  211.58    8.90
   3   1 -13  209.58    6.50
  -3   1  13  209.48    8.20
   3   1 -13  217.68    6.50
  -3   1  13  219.88    7.60
   3  -1 -13  207.48    5.30
   3  -1 -13  211.18    5.30
   3  -1 -13  196.78    8.50
  -3  -1  13  222.68    8.50
  -3   1  12  136.19    6.20
   3   1 -12  141.29    6.60
  -3   1  12  144.59    5.70
   3   1 -12  153.78    4.90
  -3  -1  12  147.69    5.60
   3  -1 -12  144.69    4.10
  -3  -1  12  138.89    6.20
   3  -1 -12  132.69    6.50
   3  -1 -12  146.19    4.00
  -3   1  11  204.38    6.90
   3   1 -11  204.88    7.90
  -3   1  11  195.98    7.10
   3   1 -11  206.08    6.20
  -3   1  11  194.68    7.40
   3  -1 -11  216.98    8.00
   3  -1 -11  202.78    5.50
  -3  -1  11  213.28    6.80
  -3  -1  11  199.78    7.50
   3   1 -10   66.09    4.00
   3   1 -10   71.39    3.00
  -3   1  10   73.99    3.90
  -3   1  10   73.39    3.60
  -3   1  10   64.49    3.40
  -3  -1  10   73.79    3.30
  -3  -1  10   66.99    3.80
   3  -1 -10   66.79    4.10
   3  -1 -10   70.49    2.50
  -3   1   9  175.78    6.30
   3   1  -9  177.88    5.40
   3   1  -9  173.08    6.50
  -3   1   9  178.28    5.90
  -3   1   9  177.08    6.00
   3  -1  -9  177.58    4.90
   3  -1  -9  181.78    7.10
  -3  -1   9  178.48    5.60
  -3  -1   9  179.98    6.40
   3  -1  -9  170.48    5.20
   3  -1  -9  180.58    6.70
  -3   1   8   54.39    3.00
  -3   1   8   59.49    2.90
   3   1  -8   58.19    2.40
  -3   1   8   52.19    3.30
  -3   1   8   55.79    2.70
   3   1  -8   52.69    3.10
   3   1  -8   55.49    2.50
   3   1  -8   58.79    3.20
  -3  -1   8   52.09    3.00
   3  -1  -8   52.89    3.20
  -3  -1   8   55.19    2.50
  -3  -1   8   56.29    2.40
  -3  -1   8   56.09    3.20
   3  -1  -8   59.09    3.10
   3  -1  -8   58.09    2.10
  -3   1   7   81.39    3.60
   3   1  -7   89.89    3.70
   3   1  -7   81.09    3.70
  -3   1   7   87.09    3.80
   3   1  -7   85.99    3.00
  -3   1   7   84.49    3.30
   3   1  -7   89.39    3.10
  -3   1   7   82.89    3.30
  -3  -1   7   86.79    3.70
   3  -1  -7   79.89    3.70
  -3  -1   7   83.49    3.60
  -3  -1   7   88.09    3.00
  -3  -1   7   86.09    3.00
   3  -1  -7   85.29    2.70
   3  -1  -7   84.29    3.60
  -3   1   6  251.07    7.40
   3   1  -6  239.48    6.50
   3   1  -6  237.68    7.30
  -3   1   6  250.97    6.90
  -3   1   6  239.18    7.10
  -3   1   6  244.58    6.90
   3   1  -6  250.57    6.70
   3   1  -6  255.57    7.30
  -3  -1   6  254.27    7.30
  -3  -1   6  238.68    6.60
   3  -1  -6  244.98    7.40
  -3  -1   6  241.98    6.40
   3  -1  -6  240.18    7.10
   3  -1  -6  237.28    6.40
  -3  -1   6  232.18    7.10
  -3   1   5    1.50    0.90
   3   1  -5    1.50    0.60
  -3   1   5    0.10    0.60
   3   1  -5    2.70    0.90
  -3   1   5   -0.10    0.60
   3   1  -5    1.60    0.80
   3  -1  -5    1.00    0.50
   3  -1  -5    0.70    0.80
  -3  -1   5    0.90    0.40
  -3  -1   5    0.20    0.60
  -3  -1   5   -0.10    0.70
   3  -1  -5    1.40    0.80
  -3  -1   5    0.40    0.50
   3   1  -4    4.30    0.80
  -3   1   4    3.90    0.70
   3   1  -4    4.90    0.90
  -3   1   4    3.70    0.70
  -3   1   4    4.60    0.80
   3   1  -4    4.40    0.70
  -3   1   4    3.90    0.60
   3  -1  -4    4.30    0.70
   3  -1  -4    4.30    0.70
  -3  -1   4    4.20    0.40
   3  -1  -4    4.40    0.60
  -3  -1   4    4.20    0.70
  -3  -1   4    4.30    0.80
   3  -1  -4    3.70    0.80
  -3  -1   4    3.90    0.80
  -3   1   3   12.70    1.30
   3   1  -3   13.00    1.00
  -3   1   3   11.70    0.90
   3   1  -3   11.30    1.00
  -3   1   3   12.30    1.00
  -3   1   3   11.70    1.00
   3   1  -3   12.20    1.00
   3  -1  -3   12.40    1.00
  -3  -1   3   10.70    0.90
   3  -1  -3   13.40    1.00
  -3  -1   3   11.80    1.00
   3  -1  -3   11.90    0.80
  -3  -1   3   12.20    1.00
  -3   1   2    2.30    0.50
  -3   1   2    1.30    0.50
   3   1  -2    1.60    0.20
  -3   1   2    1.00    0.50
   3   1  -2    2.00    0.50
   3   1  -2    1.30    0.50
  -3   1   2    1.20    0.40
   3   1  -2    1.50    0.50
  -3  -1   2    1.40    0.50
   3  -1  -2    0.70    0.40
   3  -1  -2    1.50    0.50
  -3  -1   2    1.10    0.50
   3  -1  -2    1.40    0.50
  -3  -1   2    1.30    0.50
   3  -1  -2    1.70    0.50
  -3   1   1  139.39    3.80
  -3   1   1  140.29    3.60
   3   1  -1  130.39    3.70
   3   1  -1  136.39    3.70
  -3   1   1  132.39    3.60
   3   1  -1  133.89    3.50
   3   1  -1  134.09    3.70
  -3   1   1  136.39    3.80
  -3  -1   1  134.89    3.70
   3  -1  -1  136.89    3.80
   3  -1  -1  136.99    3.70
   3  -1  -1  136.29    3.80
  -3  -1   1  134.69    3.70
  -3  -1   1  128.29    3.70
  -3  -1   1  135.29    3.50
   3  -1  -1  135.49    3.60
  -3   1   0   50.69    1.90
   3   1   0   55.69    1.90
   3   1   0   54.99    1.80
   3   1   0   54.59    1.80
   3   1   0   52.69    1.80
  -3   1   0   51.89    1.80
  -3   1   0   54.79    1.90
  -3   1   0   55.99    1.50
  -3  -1   0   50.79    1.80
  -3  -1   0   55.59    1.90
   3  -1   0   51.39    1.90
   3  -1   0   55.39    1.80
   3  -1   0   53.59    1.90
  -3  -1   0   56.69    1.90
  -3   1  -1  290.47    7.30
   3   1   1  259.67    7.50
   3   1   1  292.77    7.30
  -3   1  -1  275.37    6.90
   3   1   1  262.87    7.60
   3   1   1  296.77    7.20
  -3   1  -1  299.97    7.50
   3  -1   1  257.87    7.70
   3  -1   1  286.97    6.90
  -3  -1  -1  290.57    7.20
   3  -1   1  283.87    7.30
  -3  -1  -1  293.77    7.40
   3  -1   1  280.87    7.30
   3   1   2  159.38    4.50
   3   1   2  164.68    4.20
  -3   1  -2  145.89    4.60
   3   1   2  151.68    4.60
  -3   1  -2  165.18    4.70
  -3   1  -2  149.39    4.30
  -3   1  -2  157.78    4.50
   3   1   2  166.58    4.70
   3  -1   2  170.58    4.70
  -3  -1  -2  158.98    4.70
  -3  -1  -2  157.28    4.50
   3  -1   2  157.98    4.40
   3  -1   2  159.78    4.30
   3  -1   2  163.28    4.60
  -3   1  -3  416.96   10.50
   3   1   3  392.96   10.50
   3   1   3  437.76   10.70
  -3   1  -3  394.76   10.50
   3   1   3  383.76   10.40
  -3   1  -3  400.66   10.20
   3   1   3  392.56    9.80
  -3  -1  -3  403.96   10.70
  -3  -1  -3  429.66   10.60
   3  -1   3  410.16   10.60
   3  -1   3  380.96   10.50
   3  -1   3  410.86   10.50
   3  -1   3  401.06   10.20
  -3  -1  -3  388.96   10.40
   3   1   4   93.29    2.50
   3   1   4   99.99    3.60
  -3   1  -4   94.19    3.40
   3   1   4   94.99    3.40
   3   1   4   90.09    3.30
  -3   1  -4   85.39    3.10
  -3   1  -4   91.89    3.40
  -3   1  -4   93.39    2.90
   3  -1   4   91.29    3.10
  -3  -1  -4   88.49    3.40
  -3  -1  -4   92.79    3.40
   3  -1   4   88.59    2.90
  -3  -1  -4   86.79    3.30
   3  -1   4   88.09    3.30
   3  -1   4   94.09    3.40
  -3   1  -5  464.35   12.10
   3   1   5  453.55   12.10
  -3   1  -5  447.46   11.40
  -3   1  -5  431.26   12.10
   3   1   5  464.35   12.20
  -3   1  -5  439.66   11.90
   3   1   5  439.16   10.80
  -3  -1  -5  444.16   12.10
   3  -1   5  460.25   11.40
  -3  -1  -5  467.55   12.10
   3  -1   5  461.15   12.10
   3  -1   5  441.26   11.80
   3   1   6   41.10    2.50
  -3   1  -6   39.70    1.80
  -3   1  -6   41.10    2.50
  -3   1  -6   40.70    2.40
   3   1   6   37.50    1.10
   3   1   6   38.20    2.60
  -3   1  -6   38.50    2.40
   3   1   6   41.90    2.60
   3  -1   6   36.10    2.40
   3  -1   6   34.30    2.40
   3  -1   6   37.20    1.80
  -3  -1  -6   39.10    2.50
  -3  -1  -6   38.50    2.50
   3  -1   6   33.90    2.30
  -3   1  -7  485.95   13.10
   3   1   7  478.95   13.20
  -3   1  -7  481.85   12.10
   3   1   7  477.25   13.20
   3   1   7  491.95   13.30
  -3   1  -7  466.35   13.10
  -3  -1  -7  466.55   13.20
  -3  -1  -7  458.35   13.10
   3  -1   7  462.25   12.00
   3  -1   7  464.15   13.20
  -3  -1  -7  484.55   13.30
   3  -1   7  450.95   12.90
   3  -1   7  497.95   13.10
  -3   1  -8  207.28    7.00
   3   1   8  213.08    7.30
  -3   1  -8  208.08    7.10
   3   1   8  197.98    7.00
  -3   1  -8  209.88    5.90
   3  -1   8  208.98    7.00
  -3  -1  -8  212.88    7.30
  -3  -1  -8  197.88    7.10
   3  -1   8  205.58    7.00
   3  -1   8  204.28    7.10
   3  -1   8  203.18    5.80
  -3   1  -9  375.56   11.30
  -3   1  -9  364.86   11.20
  -3   1  -9  379.46    9.80
   3   1   9  372.26   11.40
   3  -1   9  365.56   11.40
   3  -1   9  374.56    9.70
  -3  -1  -9  382.26   11.50
  -3  -1  -9  385.76   11.60
  -3   1 -10  131.39    4.10
  -3   1 -10  134.89    5.70
  -3   1 -10  123.99    5.60
   3   1  10  118.99    5.60
   3  -1  10  114.69    5.60
   3  -1  10  126.79    4.00
  -3  -1 -10  130.19    5.80
  -3  -1 -10  129.19    5.90
  -3   1 -11  411.66   12.70
   3   1  11  410.66   12.90
  -3   1 -11  400.06   12.80
  -3   1 -11  409.06   10.50
   3  -1  11  407.06   12.90
   3  -1  11  408.16   10.50
  -3  -1 -11  412.66   13.00
  -3  -1 -11  408.86   12.90
  -3   1 -12   97.39    3.30
  -3   1 -12   91.29    5.30
   3   1  12   90.29    5.40
  -3   1 -12   99.29    5.50
   3  -1  12  101.49    5.80
  -3  -1 -12  101.19    5.80
  -3  -1 -12   93.59    5.70
   3  -1  12   98.49    3.30
  -3   1 -13  264.67   10.10
   3   1  13  261.87   10.10
  -3   1 -13  257.37    9.80
  -3  -1 -13  269.77   10.30
   3  -1  13  265.17   10.10
  -3  -1 -13  272.77   10.40
   3   1  14  143.49    7.70
  -3   1 -14  151.78    7.20
  -3   1 -14  138.99    7.30
   3  -1  14  138.19    7.50
  -3  -1 -14  146.09    7.70
  -3   1 -15  153.38    8.00
  -3   1 -15  165.18    7.90
   3   1  15  164.78    8.30
  -3  -1 -15  152.68    8.30
   3  -1  15  154.28    8.10
   3   1  16   55.19    6.00
  -3   1 -16   45.60    5.70
  -3  -1 -16   49.70    5.50
   3  -1  16   40.70    5.00
   3   1  17  151.08    8.80
  -3   1 -17  137.99    9.20
  -3  -1 -17  141.99    9.30
   3  -1  17  152.28    8.90
   3   1  18   17.00    4.90
  -3   1 -18   23.10    5.50
  -3  -1 -18   20.90    5.50
   3  -1  18   28.50    5.30
  -3   2  19    0.70    3.80
  -3   2  19   13.00    4.50
   3   2 -19   -1.00    4.70
   3  -2 -19   -3.90    4.40
  -3  -2  19   -1.30    3.90
  -3   2  18   13.20    4.10
  -3   2  18    8.00    4.30
   3   2 -18   15.60    4.90
   3  -2 -18   14.90    4.80
  -3  -2  18   12.20    3.90
  -3  -2  18   17.60    3.40
  -3   2  17    2.20    3.20
   3   2 -17   -0.70    3.50
   3  -2 -17   -1.50    3.20
  -3  -2  17   -2.20    3.20
  -3   2  16    1.70    2.80
  -3   2  16   -0.90    2.30
   3   2 -16    3.00    3.00
  -3  -2  16   -2.00    2.70
   3  -2 -16   -2.20    2.90
  -3   2  15    5.50    2.60
   3   2 -15    1.20    2.50
  -3   2  15    5.50    2.40
  -3  -2  15    3.10    2.70
   3  -2 -15    9.60    3.20
  -3   2  14   23.90    2.90
   3   2 -14   29.20    3.80
  -3   2  14   21.10    3.10
  -3  -2  14   21.10    3.20
   3  -2 -14   21.60    3.60
  -3   2  13   36.40    3.20
   3   2 -13   24.80    3.00
   3   2 -13   31.80    3.90
  -3   2  13   28.70    3.40
   3  -2 -13   31.00    3.90
  -3  -2  13   28.00    3.50
  -3  -2  13   33.70    3.60
   3   2 -12   -2.30    1.30
   3   2 -12    0.40    1.90
  -3   2  12   -2.20    1.60
   3   2 -12   -0.40    1.50
  -3   2  12    0.20    1.50
  -3  -2  12   -2.20    1.60
  -3  -2  12    0.70    1.70
   3  -2 -12    1.20    2.00
  -3   2  11    0.60    1.40
   3   2 -11   -0.10    1.30
   3   2 -11    1.00    1.50
  -3   2  11   -0.70    1.40
   3   2 -11    0.90    1.20
  -3  -2  11   -0.30    1.50
  -3  -2  11    3.10    1.20
  -3  -2  11    3.70    1.50
   3  -2 -11    0.80    0.50
   3  -2 -11    0.60    0.50
   3  -2 -11    0.10    1.50
  -3   2  10   29.80    2.60
   3   2 -10   29.10    2.40
   3   2 -10   27.00    2.80
  -3   2  10   29.00    2.90
   3   2 -10   29.30    2.20
  -3   2  10   29.00    3.10
  -3  -2  10   28.50    2.20
  -3  -2  10   33.20    2.40
  -3  -2  10   26.80    2.70
   3  -2 -10   28.70    1.40
   3  -2 -10   29.30    1.40
   3  -2 -10   30.40    3.00
   3   2  -9    0.30    1.10
   3   2  -9    2.30    1.40
   3   2  -9    1.80    0.80
  -3   2   9    0.50    1.50
  -3   2   9   -0.90    1.10
  -3   2   9   -0.40    1.10
   3  -2  -9    0.00    0.60
  -3  -2   9    1.10    1.00
   3  -2  -9   -0.20    1.50
  -3  -2   9    0.80    1.00
   3  -2  -9    1.00    0.60
  -3  -2   9   -1.40    1.00
   3  -2  -9    1.90    1.40
   3   2  -8    9.40    1.70
   3   2  -8   10.00    1.70
   3   2  -8    9.90    1.30
  -3   2   8    9.10    1.50
  -3   2   8    9.20    1.60
  -3   2   8   10.60    1.50
   3   2  -8   10.60    1.40
  -3   2   8    8.80    1.80
  -3  -2   8    8.60    1.60
   3  -2  -8    8.00    1.10
  -3  -2   8   13.20    1.90
   3  -2  -8    6.90    1.60
   3  -2  -8    8.70    1.70
  -3  -2   8   10.10    1.40
  -3  -2   8   11.30    1.20
   3  -2  -8    9.80    1.00
   3   2  -7   22.90    1.80
  -3   2   7   20.20    2.00
   3   2  -7   19.50    2.10
   3   2  -7   22.30    1.40
  -3   2   7   16.50    2.10
  -3   2   7   21.60    2.30
   3   2  -7   18.70    2.00
  -3   2   7   18.50    2.00
   3  -2  -7   21.50    1.30
  -3  -2   7   22.40    1.40
  -3  -2   7   22.80    2.20
  -3  -2   7   16.70    1.90
  -3  -2   7   17.50    1.60
   3  -2  -7   20.80    2.10
   3  -2  -7   21.80    2.10
  -3   2   6   63.89    3.10
   3   2  -6   66.29    2.70
  -3   2   6   65.19    2.80
   3   2  -6   65.19    2.20
   3   2  -6   58.59    2.90
  -3   2   6   62.29    2.80
   3   2  -6   60.29    3.10
  -3  -2   6   61.09    3.00
  -3  -2   6   63.29    2.60
  -3  -2   6   67.69    3.10
   3  -2  -6   64.39    2.20
  -3  -2   6   65.29    2.10
   3  -2  -6   67.69    2.90
   3  -2  -6   51.99    3.40
   3   2  -5   15.30    1.60
   3   2  -5   15.30    1.40
  -3   2   5   16.30    1.70
  -3   2   5   15.40    1.40
   3   2  -5   15.80    0.90
  -3   2   5   12.40    1.50
   3   2  -5   14.50    1.50
  -3  -2   5   13.40    1.30
  -3  -2   5   15.20    0.90
   3  -2  -5   18.70    1.70
  -3  -2   5   14.80    1.50
   3  -2  -5   13.40    1.40
   3  -2  -5   15.90    1.10
  -3  -2   5   15.20    1.60
   3   2  -4    1.90    0.30
  -3   2   4    2.40    0.90
   3   2  -4    1.70    0.70
   3   2  -4    1.50    0.70
  -3   2   4    1.60    0.70
   3   2  -4    0.80    0.70
  -3   2   4    1.80    0.60
   3  -2  -4    0.80    0.80
   3  -2  -4    1.60    0.70
  -3  -2   4    1.90    0.40
  -3  -2   4    1.90    0.70
  -3  -2   4    1.60    0.70
   3  -2  -4    0.20    0.70
  -3  -2   4    2.10    0.80
   3  -2  -4    2.50    0.60
  -3   2   3   12.70    1.20
  -3   2   3   11.10    1.00
   3   2  -3   12.80    1.10
   3   2  -3   14.20    1.30
  -3   2   3   13.90    1.20
   3   2  -3   14.80    1.20
   3   2  -3   13.30    0.60
  -3   2   3   13.30    1.10
   3  -2  -3   12.90    1.10
   3  -2  -3   12.20    1.00
  -3  -2   3   12.50    0.60
  -3  -2   3   11.50    1.10
   3  -2  -3   11.70    1.20
  -3  -2   3   14.40    1.30
  -3  -2   3   12.40    1.20
   3  -2  -3   14.00    1.20
  -3   2   2  145.89    4.50
   3   2  -2  155.28    4.50
  -3   2   2  153.18    4.40
  -3   2   2  153.38    4.10
   3   2  -2  151.48    4.50
   3   2  -2  155.28    3.90
   3  -2  -2  150.38    4.50
   3  -2  -2  152.28    4.50
  -3  -2   2  148.59    4.50
   3  -2  -2  158.58    4.10
   3  -2  -2  148.89    4.40
  -3  -2   2  151.98    4.30
  -3  -2   2  148.69    4.40
   3   2  -1   21.30    1.10
  -3   2   1   19.60    1.00
   3   2  -1   22.50    1.30
  -3   2   1   21.40    1.20
   3   2  -1   23.60    1.30
  -3   2   1   22.20    1.40
  -3   2   1   20.10    1.30
   3   2  -1   21.60    1.10
   3  -2  -1   22.40    1.00
   3  -2  -1   22.70    1.20
  -3  -2   1   22.60    1.20
   3  -2  -1   19.70    1.30
  -3  -2   1   22.40    1.30
   3  -2  -1   20.90    1.40
   3   2   0    2.30    0.60
  -3   2   0    2.40    0.60
  -3   2   0    2.00    0.50
   3   2   0    1.60    0.50
   3   2   0    1.80    0.60
  -3   2   0    2.40    0.70
   3   2   0    2.00    0.70
   3  -2   0    2.30    0.70
   3  -2   0    1.50    0.40
  -3  -2   0    2.20    0.50
  -3  -2   0    2.10    0.70
  -3  -2   0    2.20    0.60
   3  -2   0    1.60    0.60
  -3   2  -1    3.70    0.70
  -3   2  -1    4.20    0.60
  -3   2  -1    3.20    0.70
   3   2   1    5.50    0.80
   3   2   1    5.10    0.70
   3   2   1    4.10    0.70
  -3  -2  -1    4.10    0.80
   3  -2   1    4.10    0.70
  -3  -2  -1    3.60    0.70
  -3  -2  -1    4.10    0.60
   3  -2   1    4.10    0.80
   3  -2   1    4.20    0.60
  -3   2  -2   14.80    1.30
  -3   2  -2   15.80    1.10
  -3   2  -2   17.40    1.20
   3   2   2   16.90    1.30
   3   2   2   16.60    0.90
   3   2   2   15.90    1.10
  -3   2  -2   16.90    1.20
   3   2   2   15.90    1.30
   3  -2   2   18.00    1.40
  -3  -2  -2   16.00    1.00
   3  -2   2   15.00    1.30
   3  -2   2   16.80    1.10
  -3  -2  -2   17.80    1.40
   3  -2   2   16.00    1.20
  -3  -2  -2   17.10    1.30
  -3   2  -3   48.40    2.10
  -3   2  -3   54.49    2.20
   3   2   3   53.09    2.50
   3   2   3   49.10    1.70
   3   2   3   51.99    2.40
   3   2   3   52.39    2.20
  -3   2  -3   52.59    2.20
  -3   2  -3   50.69    2.30
   3  -2   3   54.89    2.40
  -3  -2  -3   50.79    2.40
  -3  -2  -3   49.80    2.40
   3  -2   3   47.80    2.10
   3  -2   3   48.50    2.00
   3  -2   3   50.39    2.20
   3   2   4   -0.30    0.30
   3   2   4   -0.20    0.30
   3   2   4    0.10    0.60
  -3   2  -4    0.50    0.70
   3   2   4    0.90    0.80
  -3   2  -4   -0.20    0.80
  -3   2  -4    0.30    0.70
  -3   2  -4    0.30    0.70
   3   2   4   -1.70    0.80
   3  -2   4   -0.10    0.60
   3  -2   4    1.10    0.90
   3  -2   4   -0.50    0.60
  -3  -2  -4   -1.30    0.80
  -3  -2  -4    0.10    0.80
   3  -2   4    0.20    0.70
  -3  -2  -4   -0.40    0.70
   3   2   5   13.40    1.70
  -3   2  -5   11.40    1.50
   3   2   5   11.50    1.60
  -3   2  -5   12.30    1.60
   3   2   5   10.50    0.60
  -3   2  -5   10.70    1.50
  -3   2  -5   10.00    1.20
   3   2   5   11.10    0.60
  -3  -2  -5    7.10    1.40
   3  -2   5   10.30    1.20
   3  -2   5    9.80    1.40
  -3  -2  -5    9.30    1.50
  -3  -2  -5    8.90    1.30
   3  -2   5    9.30    1.20
   3   2   6   18.80    1.90
  -3   2  -6   21.30    2.10
  -3   2  -6   22.00    2.10
  -3   2  -6   21.50    1.90
  -3   2  -6   22.70    1.70
   3   2   6   18.70    2.20
   3   2   6   19.00    2.10
  -3  -2  -6   17.80    2.00
   3  -2   6   24.60    2.10
   3  -2   6   18.60    1.60
  -3  -2  -6   21.50    2.20
   3  -2   6   23.70    2.20
  -3  -2  -6   22.20    2.20
   3  -2   6   21.20    2.00
  -3   2  -7   36.10    2.50
  -3   2  -7   33.40    2.60
  -3   2  -7   37.80    2.70
  -3   2  -7   30.40    2.10
   3   2   7   27.60    2.70
   3   2   7   34.50    2.80
   3   2   7   32.10    2.50
   3  -2   7   34.50    2.50
  -3  -2  -7   33.40    2.70
  -3  -2  -7   32.10    2.60
   3  -2   7   30.70    2.50
  -3  -2  -7   41.50    2.70
   3  -2   7   34.80    2.00
   3  -2   7   31.80    2.60
   3   2   8   -0.40    1.70
  -3   2  -8    2.10    1.30
  -3   2  -8   -1.10    1.20
   3   2   8    0.20    1.20
  -3   2  -8    1.60    1.00
  -3  -2  -8    1.30    1.30
   3  -2   8    0.80    1.40
   3  -2   8    0.60    1.40
   3  -2   8   -0.20    1.20
   3  -2   8   -0.40    0.80
  -3  -2  -8    0.10    1.30
   3   2   9   43.60    3.30
  -3   2  -9   42.30    3.30
  -3   2  -9   44.40    2.60
  -3   2  -9   45.10    3.20
  -3  -2  -9   42.10    3.40
   3  -2   9   42.50    3.30
  -3  -2  -9   42.30    3.30
   3  -2   9   42.50    2.40
   3   2  10    4.10    1.80
  -3   2 -10    4.40    1.40
  -3   2 -10    4.50    1.80
  -3   2 -10    4.90    1.80
   3  -2  10    4.00    1.70
  -3  -2 -10    0.30    1.70
   3  -2  10    4.50    1.30
  -3  -2 -10    3.90    1.90
  -3   2 -11   17.20    2.60
   3   2  11   21.30    2.80
  -3   2 -11   20.00    2.10
  -3   2 -11   28.30    3.30
   3  -2  11   20.30    2.90
  -3  -2 -11   20.30    2.90
   3  -2  11   20.40    2.10
  -3   2 -12   -2.50    1.90
   3   2  12   -1.80    1.70
  -3   2 -12   -0.10    2.00
  -3   2 -12    1.60    1.50
   3  -2  12   -1.50    1.90
   3  -2  12   -1.10    1.30
  -3  -2 -12   -2.40    2.20
  -3   2 -13   24.60    3.40
  -3   2 -13   23.40    3.60
   3   2  13   20.50    3.40
  -3  -2 -13   27.80    3.70
   3  -2  13   24.60    3.60
   3  -2  13   27.10    2.40
  -3   2 -14    7.90    2.90
   3   2  14    6.80    3.00
  -3   2 -14    5.60    2.60
  -3  -2 -14    4.30    2.70
   3  -2  14    6.20    3.30
   3  -2  14    7.10    1.50
  -3   2 -15   27.20    3.90
  -3   2 -15   25.70    4.30
   3   2  15   24.20    4.00
   3  -2  15   25.60    4.10
  -3   2 -16   -1.40    3.30
   3   2  16    2.60    3.20
  -3   2 -16    5.50    5.30
  -3  -2 -16    0.50    3.30
   3  -2  16   -1.80    3.30
   3   2  17    3.00    3.70
  -3   2 -17   11.70    4.30
  -3   2 -17   13.70    4.50
  -3  -2 -17    3.00    3.90
   3  -2  17   10.30    4.30
  -3   2 -18   -0.90    4.70
   3   2  18   -2.50    4.50
   3  -2  18   -5.20    4.60
  -3  -2 -18    0.20    5.00
  -3   3  19    2.80    4.10
   3   3 -19    9.30    7.40
  -3   3  19    3.30    4.00
  -3  -3  19   -0.90    4.10
   3  -3 -19    5.10    4.90
  -3   3  18  160.58    9.30
  -3   3  18  167.88    8.80
   3   3 -18  156.18    9.70
   3  -3 -18  153.28    9.80
  -3  -3  18  164.58    9.20
   3   3 -17    9.00    3.80
  -3   3  17   -1.30    3.10
   3  -3 -17    3.80    3.50
  -3  -3  17    1.70    3.30
  -3   3  16  205.08    9.00
   3   3 -16  201.38    9.90
  -3   3  16  189.68    8.30
  -3  -3  16  182.38    8.80
   3  -3 -16  199.88    9.80
  -3   3  15    2.60    2.20
   3   3 -15   -0.70    2.60
  -3   3  15    4.80    2.50
  -3  -3  15    1.30    2.50
   3  -3 -15    2.30    3.20
  -3   3  14  254.87    9.60
   3   3 -14  246.28   10.10
  -3   3  14  266.27    9.50
  -3  -3  14  257.77    9.80
   3  -3 -14  245.38   10.20
  -3   3  13   23.80    2.90
   3   3 -13   19.80    3.30
  -3   3  13   22.40    3.10
   3   3 -13   30.10    3.00
   3  -3 -13   24.50    3.70
  -3  -3  13   27.00    3.20
  -3  -3  13   24.90    2.60
  -3  -3  13   27.20    2.80
   3   3 -12  149.09    5.40
  -3   3  12  144.19    6.30
   3   3 -12  139.69    6.70
  -3   3  12  141.99    6.00
   3   3 -12  145.19    5.60
  -3  -3  12  151.08    5.50
  -3  -3  12  148.79    6.40
   3  -3 -12  142.39    6.90
   3   3 -11    9.20    1.80
  -3   3  11    6.00    1.80
  -3   3  11    9.00    2.10
   3   3 -11    5.90    2.10
  -3  -3  11   10.20    1.70
  -3  -3  11   10.00    1.60
   3  -3 -11    9.20    0.70
  -3  -3  11    4.00    1.70
   3  -3 -11   11.00    2.40
  -3   3  10  124.99    5.30
   3   3 -10  123.79    5.70
  -3   3  10  130.79    5.40
   3   3 -10  125.79    4.50
   3   3 -10  126.19    4.90
   3  -3 -10  140.89    3.60
  -3  -3  10  125.09    4.70
  -3  -3  10  131.79    4.50
   3  -3 -10  128.49    3.60
   3  -3 -10  116.39    5.70
  -3  -3  10  122.49    5.40
  -3   3   9   16.20    2.40
   3   3  -9   17.70    2.00
   3   3  -9   15.30    2.20
   3   3  -9   15.20    1.60
  -3   3   9   12.20    1.80
  -3   3   9   14.70    2.00
   3  -3  -9   17.00    2.40
  -3  -3   9   14.20    1.80
   3  -3  -9   12.00    1.90
   3  -3  -9   15.90    1.20
  -3  -3   9   13.80    1.90
  -3  -3   9   16.10    1.70
   3   3  -8  127.99    4.10
  -3   3   8  135.99    5.00
   3   3  -8  134.19    5.20
   3   3  -8  128.39    5.30
   3   3  -8  131.29    4.60
  -3   3   8  129.29    4.10
  -3   3   8  130.29    5.20
  -3   3   8  131.49    5.00
   3  -3  -8  130.39    5.00
  -3  -3   8  126.59    5.00
   3  -3  -8  122.89    3.80
   3  -3  -8  129.99    5.40
  -3  -3   8  132.69    4.70
  -3  -3   8  130.29    4.10
  -3   3   7    3.60    1.20
   3   3  -7    6.00    1.20
  -3   3   7    6.80    1.60
  -3   3   7    5.00    0.80
   3   3  -7    5.00    1.40
   3   3  -7    4.20    1.40
   3   3  -7    5.00    0.80
  -3   3   7    4.40    1.20
  -3  -3   7    3.80    1.50
   3  -3  -7    3.10    0.70
   3  -3  -7    5.30    1.30
  -3  -3   7    4.40    1.20
   3  -3  -7    3.00    1.40
  -3  -3   7    3.60    1.10
  -3  -3   7    4.60    0.80
  -3   3   6   71.59    3.00
  -3   3   6   68.29    3.20
  -3   3   6   67.59    3.50
   3   3  -6   71.79    3.40
   3   3  -6   73.29    3.20
   3   3  -6   69.99    3.10
  -3   3   6   71.89    2.60
   3   3  -6   69.79    2.40
   3  -3  -6   71.29    3.50
   3  -3  -6   66.79    2.60
  -3  -3   6   76.19    3.40
   3  -3  -6   68.89    3.00
  -3  -3   6   71.49    2.40
   3   3  -5   17.90    1.60
  -3   3   5   19.40    1.70
  -3   3   5   18.10    1.40
   3   3  -5   17.80    1.60
   3   3  -5   16.30    1.00
  -3   3   5   19.60    1.90
  -3   3   5   16.50    1.30
   3   3  -5   15.70    2.00
   3  -3  -5   18.00    1.90
  -3  -3   5   15.50    1.40
   3  -3  -5   15.70    1.30
  -3  -3   5   16.30    1.00
  -3  -3   5   17.60    1.60
   3  -3  -5   17.00    1.30
  -3  -3   5   19.00    1.90
   3   3  -4    9.50    1.40
  -3   3   4    9.50    1.60
   3   3  -4   11.70    1.40
   3   3  -4   10.50    1.20
  -3   3   4    9.20    1.40
  -3   3   4   10.80    1.20
  -3   3   4    8.70    1.10
   3   3  -4    8.80    0.80
   3  -3  -4   12.10    1.20
  -3  -3   4   10.20    1.30
  -3  -3   4   11.60    1.40
   3  -3  -4    9.50    1.20
   3  -3  -4    9.60    1.60
  -3  -3   4   11.00    1.50
  -3  -3   4   10.30    0.80
   3  -3  -4   10.10    1.50
  -3   3   3   -0.30    0.80
  -3   3   3    1.10    0.70
   3   3  -3    0.10    0.80
   3   3  -3    0.40    0.60
  -3   3   3   -0.80    0.40
  -3   3   3   -0.20    0.80
   3   3  -3   -0.40    0.80
   3   3  -3   -0.40    0.40
  -3  -3   3   -0.30    0.80
   3  -3  -3   -0.10    0.50
   3  -3  -3   -0.80    0.60
  -3  -3   3   -0.50    0.60
   3  -3  -3   -0.40    0.80
  -3  -3   3   -0.50    0.70
   3  -3  -3    0.90    0.90
  -3  -3   3   -0.50    0.40
   3   3  -2  221.78    5.80
  -3   3   2  216.98    5.60
  -3   3   2  222.78    6.20
  -3   3   2  218.78    6.40
   3   3  -2  219.18    6.00
   3   3  -2  231.68    6.30
   3   3  -2  218.18    6.40
  -3   3   2  217.68    6.40
  -3  -3   2  208.18    6.20
   3  -3  -2  224.28    6.50
  -3  -3   2  214.08    5.90
   3  -3  -2  213.38    6.30
  -3  -3   2  219.78    5.80
   3  -3  -2  220.08    5.70
   3  -3  -2  220.28    6.30
  -3   3   1    2.50    0.80
   3   3  -1    2.30    0.60
  -3   3   1    2.20    0.40
  -3   3   1    3.40    0.90
   3   3  -1    1.70    0.70
   3   3  -1    2.50    0.60
   3   3  -1    2.70    0.90
  -3   3   1    2.10    0.90
   3  -3  -1    2.50    0.50
   3  -3  -1    2.10    0.80
  -3  -3   1    3.40    0.80
   3  -3  -1    2.10    0.80
  -3  -3   1    1.90    0.60
   3  -3  -1    1.20    0.70
   3   3   0  209.38    5.40
   3   3   0  201.28    5.70
   3   3   0  192.08    5.60
   3   3   0  202.88    6.00
  -3   3   0  199.38    5.80
  -3   3   0  199.48    5.90
  -3   3   0  200.88    5.70
   3  -3   0  189.38    5.80
   3  -3   0  207.48    5.10
  -3  -3   0  202.78    5.40
  -3  -3   0  188.88    5.60
   3  -3   0  197.88    5.90
   3   3   1   13.00    1.40
   3   3   1   12.20    1.00
   3   3   1   13.10    1.00
  -3   3  -1   15.40    1.40
  -3   3  -1   12.00    1.10
  -3   3  -1   11.40    1.30
   3   3   1   13.50    1.30
  -3   3  -1   11.20    1.10
  -3  -3  -1   10.90    1.10
  -3  -3  -1   10.40    1.30
   3  -3   1   13.40    1.30
   3  -3   1   12.10    0.90
   3  -3   1   12.70    1.40
  -3   3  -2  847.92   21.50
  -3   3  -2  907.01   21.80
  -3   3  -2  878.61   21.30
   3   3   2  866.41   21.30
  -3   3  -2  857.41   21.80
   3   3   2  911.21   21.90
   3   3   2  867.51   21.40
   3   3   2  850.81   21.40
   3   3   2  930.11   22.10
  -3  -3  -2  858.01   21.30
   3  -3   2  930.81   21.90
   3  -3   2  869.31   21.80
  -3  -3  -2  838.72   21.90
   3  -3   2  855.91   21.30
   3   3   3    5.70    0.90
   3   3   3    5.90    1.20
  -3   3  -3    6.50    0.90
  -3   3  -3    7.10    1.10
  -3   3  -3    5.60    1.10
   3   3   3    5.40    1.20
   3   3   3    7.40    1.10
  -3   3  -3    6.50    1.10
  -3  -3  -3    5.80    0.80
   3  -3   3    6.60    1.00
   3  -3   3    6.80    1.20
   3  -3   3    4.70    1.00
   3  -3   3    6.00    1.00
  -3  -3  -3    5.50    1.20
   3   3   4  391.26   10.90
   3   3   4  428.36   11.40
   3   3   4  430.86   11.50
  -3   3  -4  422.86   10.90
  -3   3  -4  400.76   11.10
   3   3   4  414.26   10.20
  -3   3  -4  410.26   11.00
  -3   3  -4  424.06   11.00
   3  -3   4  397.26   10.90
   3  -3   4  398.06   10.90
  -3  -3  -4  374.46   11.40
  -3  -3  -4  404.96   10.20
   3  -3   4  437.06   11.20
   3  -3   4  402.06   11.00
  -3   3  -5   11.50    1.50
  -3   3  -5   14.30    1.60
   3   3   5   13.60    1.80
  -3   3  -5   11.40    1.60
   3   3   5   12.00    0.90
  -3   3  -5   11.30    1.40
   3   3   5   12.60    1.80
  -3  -3  -5   11.90    1.70
   3  -3   5   11.30    1.60
   3  -3   5   12.10    1.50
   3  -3   5    9.70    1.30
  -3  -3  -5   12.20    1.50
  -3   3  -6  563.54   14.70
   3   3   6  533.55   15.10
  -3   3  -6  550.04   14.80
  -3   3  -6  555.44   14.50
   3   3   6  532.15   15.10
  -3   3  -6  528.75   14.70
   3   3   6  559.34   14.80
   3   3   6  555.84   13.20
   3   3   6  548.95   13.20
  -3  -3  -6  565.54   14.70
   3  -3   6  567.24   14.80
   3  -3   6  553.74   14.80
  -3  -3  -6  553.64   15.20
   3  -3   6  551.24   14.70
  -3   3  -7   12.70    1.80
  -3   3  -7   14.10    1.70
  -3   3  -7   15.30    2.00
  -3   3  -7   16.60    2.00
   3   3   7   15.00    2.30
   3   3   7   14.90    1.90
   3  -3   7   14.10    1.80
   3  -3   7   19.10    2.20
   3  -3   7   18.30    1.90
  -3  -3  -7   18.80    2.20
  -3  -3  -7   15.10    2.20
   3  -3   7   15.40    2.00
  -3   3  -8  698.53   17.60
   3   3   8  675.33   18.20
  -3   3  -8  675.83   18.20
  -3   3  -8  680.93   18.40
   3  -3   8  686.73   17.50
   3  -3   8  650.13   17.90
   3  -3   8  683.43   18.40
  -3  -3  -8  670.83   18.70
   3  -3   8  678.83   18.10
  -3   3  -9    5.10    1.60
  -3   3  -9    6.10    1.70
   3   3   9    4.20    1.70
  -3   3  -9    6.50    1.90
   3  -3   9    5.20    1.70
  -3  -3  -9    5.40    1.90
   3  -3   9    4.20    1.40
  -3   3 -10  462.75   12.90
   3   3  10  466.35   14.00
  -3   3 -10  492.35   13.90
  -3   3 -10  466.15   14.10
   3  -3  10  465.45   14.00
  -3  -3 -10  471.25   14.50
   3  -3  10  470.35   12.80
  -3   3 -11    2.10    1.80
  -3   3 -11    2.50    1.90
  -3   3 -11   -0.10    1.90
   3   3  11    2.70    2.00
   3  -3  11    2.20    1.90
  -3  -3 -11    0.70    2.00
   3  -3  11   -1.40    1.20
  -3   3 -12  344.37   10.60
   3   3  12  359.96   12.00
  -3   3 -12  376.56   12.30
  -3   3 -12  358.86   11.70
  -3  -3 -12  358.66   12.50
   3  -3  12  364.26   10.30
   3  -3  12  353.46   12.10
   3   3  13    7.80    2.70
  -3   3 -13    8.60    2.80
  -3   3 -13    9.60    2.90
   3  -3  13    9.00    1.90
   3  -3  13    9.90    2.80
  -3  -3 -13    9.90    3.10
  -3   3 -14  358.26   12.20
  -3   3 -14  364.86   12.90
   3   3  14  320.47   13.60
  -3  -3 -14  362.06   13.00
   3  -3  14  348.97   10.10
  -3   3 -15    0.90    3.30
   3   3  15   -0.70    2.90
  -3   3 -15   -1.20    3.10
   3  -3  15    0.60    3.00
  -3  -3 -15   -0.30    3.00
  -3   3 -16  141.89    8.80
   3   3  16  137.39    8.10
  -3   3 -16  134.29    9.00
   3  -3  16  122.89    8.10
  -3  -3 -16  147.49    9.00
   3   3  17   28.20    8.30
  -3   3 -17   18.80    5.00
  -3   3 -17   22.30    4.80
   3   3  17   23.10    4.90
  -3  -3 -17   25.70    5.50
   3  -3  17   27.10    4.90
  -3   3 -18  153.58   10.50
   3   3  18  142.69   10.90
  -3   3 -18  158.38   10.00
   3   3  18  143.79    9.90
  -3  -3 -18  129.19   10.50
   3  -3  18  150.88    9.80
   3   4 -19   -1.60    4.80
  -3   4  19   -0.50    4.50
  -3   4  19   -1.60    4.50
  -3  -4  19   11.50    4.60
   3  -4 -19   11.20    5.50
  -3   4  18    7.40    3.80
  -3   4  18    4.00    3.70
   3   4 -18   -4.10    4.40
  -3  -4  18    5.90    3.80
   3  -4 -18   -0.40    4.30
  -3   4  17    7.90    3.30
   3   4 -17    9.20    4.20
  -3   4  17    5.50    3.30
   3  -4 -17    6.00    4.30
  -3  -4  17    8.00    3.40
  -3   4  16   13.20    3.20
  -3   4  16   11.90    3.30
   3   4 -16   14.50    3.80
  -3  -4  16   13.90    3.40
   3  -4 -16   11.30    3.60
  -3   4  15   23.00    3.70
  -3   4  15   18.30    3.50
  -3  -4  15   19.50    5.40
   3  -4 -15   21.70    4.10
  -3  -4  15   17.60    2.60
   3   4 -14    1.50    1.90
  -3   4  14    1.50    2.30
   3   4 -14   -1.10    2.60
  -3   4  14    4.10    2.30
  -3  -4  14    0.50    2.20
  -3  -4  14   -0.50    1.80
   3  -4 -14    2.00    2.60
  -3   4  13   19.50    3.00
  -3   4  13   24.00    3.10
   3   4 -13   22.70    3.40
   3   4 -13   18.30    2.30
  -3  -4  13   18.00    2.90
  -3  -4  13   20.40    2.60
  -3  -4  13   13.30    3.40
   3  -4 -13   20.30    3.50
   3   4 -12   21.20    3.20
  -3   4  12   22.40    2.80
  -3   4  12   22.50    3.00
   3   4 -12   22.60    2.70
  -3  -4  12   17.30    2.90
  -3  -4  12   23.30    2.90
  -3  -4  12   20.20    2.50
   3  -4 -12   21.10    3.20
  -3   4  11   65.29    4.10
   3   4 -11   73.69    4.70
  -3   4  11   63.19    4.10
  -3  -4  11   65.09    3.70
   3  -4 -11   71.99    2.10
  -3  -4  11   69.39    4.40
   3  -4 -11   62.89    4.70
  -3  -4  11   73.29    3.50
   3  -4 -11   68.09    2.10
   3   4 -10    3.00    1.20
  -3   4  10    2.00    1.50
  -3   4  10    1.90    1.50
   3   4 -10    1.80    1.60
  -3  -4  10    1.10    1.20
  -3  -4  10   -1.60    1.40
   3  -4 -10    0.70    1.70
   3  -4 -10    2.20    0.70
  -3  -4  10    0.30    1.30
  -3   4   9   39.10    1.90
   3   4  -9   42.60    3.30
   3   4  -9   38.60    2.20
  -3   4   9   38.30    2.90
  -3   4   9   34.30    2.90
   3   4  -9   32.60    3.10
  -3  -4   9   38.60    2.30
  -3  -4   9   33.70    2.60
   3  -4  -9   38.20    1.90
   3  -4  -9   31.20    2.80
  -3  -4   9   37.50    2.90
   3  -4  -9   40.00    3.40
  -3   4   8   17.60    1.50
   3   4  -8   11.00    2.00
  -3   4   8   16.20    2.00
   3   4  -8   14.40    2.00
   3   4  -8   14.90    1.50
  -3   4   8   13.30    1.70
   3   4  -8   15.00    1.90
  -3  -4   8   15.20    1.90
   3  -4  -8   15.90    2.20
   3  -4  -8   12.50    1.70
   3  -4  -8   13.40    1.40
  -3  -4   8   16.80    1.60
  -3  -4   8   16.10    1.90
  -3   4   7   83.39    4.30
   3   4  -7   77.29    3.70
  -3   4   7   71.39    3.80
   3   4  -7   81.29    2.90
   3   4  -7   82.69    4.00
   3   4  -7   78.99    3.60
  -3   4   7   71.99    3.40
  -3   4   7   80.99    3.00
  -3  -4   7   76.89    3.50
  -3  -4   7   74.99    3.60
   3  -4  -7   84.19    4.20
   3  -4  -7   84.59    3.00
   3  -4  -7   76.59    3.40
  -3  -4   7   75.29    3.90
  -3  -4   7   82.89    2.90
   3   4  -6   28.20    2.30
  -3   4   6   25.60    2.50
   3   4  -6   29.20    2.40
  -3   4   6   29.10    2.70
   3   4  -6   26.20    2.30
  -3   4   6   31.30    1.80
   3   4  -6   30.70    1.60
  -3   4   6   26.20    1.90
   3  -4  -6   33.10    2.50
  -3  -4   6   29.70    2.30
  -3  -4   6   30.10    1.60
   3  -4  -6   25.90    1.70
  -3  -4   6   24.00    2.00
  -3  -4   6   30.40    2.50
   3  -4  -6   27.30    2.00
   3   4  -5  119.59    4.70
  -3   4   5  114.29    3.80
   3   4  -5  117.19    3.60
  -3   4   5  126.39    4.80
  -3   4   5  122.49    4.00
   3   4  -5  119.09    4.40
   3   4  -5  118.19    4.10
  -3   4   5  113.29    4.50
   3  -4  -5  112.29    3.90
  -3  -4   5  119.99    4.50
  -3  -4   5  116.49    4.10
   3  -4  -5  118.79    4.70
   3  -4  -5  118.59    4.60
   3  -4  -5  116.79    3.90
  -3  -4   5  110.69    4.30
  -3  -4   5  107.89    3.80
  -3   4   4  436.66   11.10
   3   4  -4  448.06   11.50
   3   4  -4  424.26   12.10
  -3   4   4  442.66   12.10
  -3   4   4  453.95   11.60
   3   4  -4  443.16   11.90
   3   4  -4  427.06   11.10
  -3   4   4  459.25   12.30
   3  -4  -4  474.95   11.20
   3  -4  -4  443.86   12.10
   3  -4  -4  439.26   11.50
  -3  -4   4  455.75   12.10
  -3  -4   4  444.46   11.50
  -3  -4   4  429.36   11.80
  -3  -4   4  388.86   11.30
   3  -4  -4  425.76   12.30
  -3   4   3   64.69    2.10
  -3   4   3   69.59    3.20
   3   4  -3   66.29    2.50
   3   4  -3   59.49    2.80
  -3   4   3   62.59    2.70
   3   4  -3   62.59    2.40
   3  -4  -3   59.29    2.60
  -3  -4   3   60.59    2.40
  -3  -4   3   64.49    2.40
   3  -4  -3   65.29    2.10
   3  -4  -3   67.89    3.10
   3  -4  -3   66.29    3.10
  -3   4   2   10.40    1.40
  -3   4   2   13.50    1.50
   3   4  -2   14.80    1.50
  -3   4   2   10.60    1.30
   3   4  -2   12.00    1.20
   3   4  -2   11.90    1.10
   3   4  -2   10.30    1.30
  -3   4   2   11.40    0.70
   3  -4  -2   12.90    1.50
  -3  -4   2    9.30    1.30
   3  -4  -2   11.40    0.70
   3  -4  -2    9.40    1.20
  -3  -4   2   11.20    1.00
   3  -4  -2   14.20    1.70
  -3  -4   2   10.70    1.20
   3   4  -1   17.90    1.80
  -3   4   1   14.40    1.60
  -3   4   1   17.40    1.60
   3   4  -1   14.30    1.50
   3   4  -1   17.90    1.40
  -3   4   1   17.50    1.60
  -3  -4   1   16.60    1.10
   3  -4  -1   14.60    1.70
   3  -4  -1   16.20    1.60
   3  -4  -1   15.30    1.50
  -3  -4   1   15.50    1.50
   3  -4  -1   16.40    0.70
   3   4   0  120.89    4.40
  -3   4   0  121.89    4.20
   3   4   0  113.79    4.00
   3   4   0  123.59    4.00
  -3   4   0  121.49    4.30
  -3   4   0  118.49    4.10
   3  -4   0  114.89    4.20
   3  -4   0  120.49    3.20
   3  -4   0  123.49    4.30
  -3  -4   0  125.19    3.60
   3  -4   0  121.39    3.20
  -3  -4   0  118.89    4.00
   3   4   1   25.40    2.00
  -3   4  -1   23.70    1.70
  -3   4  -1   28.60    1.90
   3   4   1   25.00    1.70
   3   4   1   29.00    1.40
   3   4   1   23.80    1.70
  -3   4  -1   26.60    1.90
  -3   4  -1   28.50    1.90
   3  -4   1   22.30    1.80
   3  -4   1   26.10    1.20
   3  -4   1   26.50    1.90
   3  -4   1   24.50    1.20
  -3  -4  -1   24.70    1.70
  -3  -4  -1   27.00    2.00
   3   4   2   22.90    1.90
  -3   4  -2   18.80    1.70
   3   4   2   23.30    2.10
   3   4   2   16.40    1.90
  -3   4  -2   22.80    1.90
  -3   4  -2   21.20    1.70
   3   4   2   21.00    1.40
   3   4   2   21.20    1.40
   3   4   2   22.10    1.80
  -3  -4  -2   19.30    1.40
   3  -4   2   20.10    1.30
   3  -4   2   18.90    1.80
   3  -4   2   15.70    2.00
  -3   4  -3    4.20    1.10
   3   4   3    2.30    0.80
   3   4   3    0.90    1.10
   3   4   3    5.60    1.30
   3   4   3    4.40    1.20
   3   4   3    2.70    0.80
  -3   4  -3    2.10    0.80
  -3   4  -3    3.60    1.00
   3  -4   3    2.50    0.80
  -3  -4  -3    3.10    0.80
  -3  -4  -3    3.40    1.10
   3  -4   3    2.60    1.00
   3  -4   3    5.10    1.20
   3   4   4    2.90    0.70
   3   4   4    1.20    0.90
  -3   4  -4    3.20    1.00
   3   4   4   -0.10    1.20
  -3   4  -4    3.70    1.20
  -3   4  -4    2.70    0.90
  -3   4  -4    2.00    1.10
   3   4   4    2.60    1.40
  -3  -4  -4    1.70    0.70
   3  -4   4    0.30    0.80
   3  -4   4    1.10    1.00
   3  -4   4    2.50    1.10
  -3  -4  -4    0.70    1.10
   3  -4   4    4.20    1.10
  -3   4  -5   -0.80    0.90
   3   4   5    0.00    1.40
  -3   4  -5    0.90    1.00
   3   4   5    0.50    1.00
   3   4   5    1.50    1.30
   3   4   5    1.00    0.60
  -3   4  -5    0.70    1.00
  -3   4  -5    0.80    1.20
   3  -4   5   -0.90    1.00
   3  -4   5    1.90    1.10
  -3  -4  -5    1.70    1.10
   3  -4   5    2.90    1.20
  -3  -4  -5   -0.30    0.60
  -3   4  -6   57.09    3.10
   3   4   6   48.50    3.40
   3   4   6   49.10    1.90
  -3   4  -6   55.19    3.00
  -3   4  -6   50.39    2.90
  -3   4  -6   53.29    3.10
   3   4   6   53.49    2.90
  -3  -4  -6   47.50    3.30
   3  -4   6   51.79    2.90
   3  -4   6   48.10    2.80
  -3  -4  -6   46.50    2.80
   3  -4   6   56.49    3.00
   3  -4   6   48.10    3.10
   3   4   7    3.30    0.50
  -3   4  -7    1.80    1.40
   3   4   7    3.40    0.60
   3   4   7    4.10    1.40
  -3   4  -7    4.90    1.50
  -3   4  -7    2.70    1.50
  -3   4  -7    3.90    1.50
  -3  -4  -7    5.10    1.70
   3  -4   7    3.00    1.30
   3  -4   7    3.80    1.60
   3  -4   7    7.00    1.80
  -3  -4  -7    4.40    1.50
   3  -4   7    2.00    1.20
   3   4   8   75.29    3.90
  -3   4  -8   75.89    4.10
  -3   4  -8   68.99    3.80
  -3   4  -8   73.29    3.90
  -3  -4  -8   80.49    4.70
   3  -4   8   82.29    4.10
   3  -4   8   76.79    3.70
  -3   4  -9   11.00    2.20
  -3   4  -9    9.70    2.10
   3   4   9    8.80    1.90
  -3   4  -9    9.80    2.00
   3  -4   9    7.20    1.70
  -3  -4  -9    9.60    2.20
   3  -4   9    8.80    1.90
   3   4  10   16.40    2.60
  -3   4 -10   14.50    2.50
  -3   4 -10   11.70    2.40
   3  -4  10   17.30    2.50
   3  -4  10   13.30    2.00
  -3  -4 -10   11.50    2.50
  -3   4 -11    7.30    2.00
  -3   4 -11    5.10    2.10
   3   4  11    5.90    2.10
  -3  -4 -11    5.40    2.40
   3  -4  11    8.40    2.40
   3  -4  11    8.50    1.80
   3   4  12   31.00    3.70
  -3   4 -12   34.10    3.90
  -3   4 -12   33.50    4.20
   3  -4  12   29.30    3.60
   3  -4  12   30.70    3.20
  -3  -4 -12   29.60    3.90
   3   4  13    2.30    2.50
  -3   4 -13    3.20    2.50
  -3   4 -13    1.10    2.50
   3  -4  13    0.80    2.30
   3  -4  13    0.30    1.80
  -3  -4 -13    3.20    2.80
  -3   4 -14   -0.30    2.60
   3   4  14    8.20    2.90
  -3   4 -14    1.20    2.70
   3  -4  14    3.10    2.10
   3  -4  14    4.40    3.30
   3   4  15    0.40    3.10
  -3   4 -15    6.40    3.30
  -3   4 -15    1.90    3.30
   3   4  15    5.40    3.30
   3  -4  15    5.80    2.90
   3  -4  15    4.20    3.30
  -3  -4 -15    3.40    3.60
   3   4  16    2.70    3.60
   3   4  16    0.50    3.80
  -3   4 -16   -5.60    6.30
  -3   4 -16   -5.10    3.50
   3  -4  16   -1.50    3.40
  -3  -4 -16   -4.90    3.50
  -3   4 -17   16.60    4.90
   3   4  17   14.60    4.50
  -3   4 -17    2.90    4.60
   3   4  17   13.20    4.40
  -3  -4 -17   11.70    4.70
   3  -4  17   13.30    4.50
   3   5 -18    6.60    4.80
  -3   5  18    7.80    4.20
  -3   5  18    6.70    4.30
  -3  -5  18    6.40    4.00
   3  -5 -18    4.80    4.80
  -3   5  17   99.69    7.50
  -3   5  17  112.99    7.30
   3   5 -17  110.29    8.80
   3  -5 -17  106.99    8.20
  -3  -5  17  127.79    7.80
   3   5 -16   12.20    4.10
  -3   5  16   22.40    3.90
  -3   5  16   13.90    3.50
  -3  -5  16   14.90    3.00
   3  -5 -16   15.30    4.70
  -3  -5  16   17.40    3.70
   3   5 -15  126.59    5.90
  -3   5  15  128.69    6.80
  -3   5  15  122.59    7.30
   3   5 -15  127.29    7.70
  -3  -5  15  123.29    6.10
  -3  -5  15  124.49    8.50
   3  -5 -15  125.89    7.90
   3   5 -14   10.50    3.20
  -3   5  14   12.10    3.20
  -3   5  14   11.80    2.70
   3   5 -14   11.20    2.40
  -3  -5  14    9.90    2.80
   3  -5 -14    6.80    5.20
  -3  -5  14    9.20    2.30
   3   5 -13  206.98    9.10
   3   5 -13  200.38    7.00
  -3   5  13  216.28    8.50
  -3   5  13  201.38    8.10
  -3  -5  13  212.78    8.60
   3  -5 -13  191.18    9.00
  -3  -5  13  200.08    7.50
   3   5 -12   11.80    2.60
  -3   5  12    7.60    2.20
   3   5 -12   10.10    1.90
  -3   5  12   10.90    2.70
  -3  -5  12   10.50    2.20
  -3  -5  12   12.60    2.60
   3  -5 -12    6.80    2.60
  -3  -5  12    8.70    2.10
  -3   5  11  216.48    7.70
   3   5 -11  202.38    7.60
   3   5 -11  203.38    8.40
  -3   5  11  212.38    8.20
  -3  -5  11  220.38    7.50
   3  -5 -11  211.78    8.80
  -3  -5  11  212.58    6.80
  -3  -5  11  221.38    8.10
   3  -5 -11  214.68    5.70
  -3   5  10    3.70    1.70
  -3   5  10    9.30    2.10
   3   5 -10    8.70    2.20
   3   5 -10    8.70    1.50
  -3   5  10    9.60    1.20
  -3  -5  10    6.60    1.60
  -3  -5  10    5.70    1.70
   3  -5 -10    6.70    1.10
  -3  -5  10    5.70    1.70
   3  -5 -10    6.90    2.10
   3   5  -9  124.29    4.30
   3   5  -9  119.49    5.70
  -3   5   9  121.09    4.90
  -3   5   9  120.99    4.10
  -3   5   9  114.09    5.40
   3  -5  -9  122.89    4.00
  -3  -5   9  113.19    5.10
  -3  -5   9  116.49    5.00
   3  -5  -9  116.79    4.90
   3  -5  -9  122.69    5.90
  -3  -5   9  124.89    4.30
  -3   5   8    4.00    1.10
   3   5  -8    2.30    1.00
   3   5  -8    3.10    1.60
  -3   5   8    1.80    1.60
   3   5  -8    2.60    1.80
  -3   5   8    2.30    1.20
  -3  -5   8    3.20    1.20
   3  -5  -8    3.60    1.00
   3  -5  -8    2.40    1.70
   3  -5  -8    3.30    1.50
  -3  -5   8    3.00    1.10
  -3  -5   8    1.30    1.30
   3   5  -7   32.20    2.80
   3   5  -7   29.50    2.60
  -3   5   7   35.60    2.80
   3   5  -7   33.50    2.00
  -3   5   7   33.80    2.20
  -3  -5   7   32.80    2.00
  -3  -5   7   28.40    2.40
   3  -5  -7   33.90    2.40
  -3  -5   7   29.40    2.50
   3  -5  -7   35.70    3.20
   3  -5  -7   31.40    2.00
   3   5  -6    7.70    1.70
  -3   5   6   11.30    1.40
   3   5  -6   16.40    2.10
  -3   5   6   11.60    1.80
   3   5  -6   12.30    1.40
   3   5  -6   11.20    1.60
  -3   5   6   13.90    1.60
  -3  -5   6   12.50    1.50
   3  -5  -6   13.00    1.40
  -3  -5   6   12.10    1.70
   3  -5  -6   12.70    1.50
   3  -5  -6   11.40    1.90
  -3  -5   6   10.40    1.40
   3   5  -5   20.90    2.20
  -3   5   5   20.10    2.20
  -3   5   5   23.00    2.00
  -3   5   5   23.00    1.60
   3   5  -5   18.80    2.20
  -3   5   5   21.90    2.50
   3   5  -5   20.40    1.90
   3   5  -5   18.20    1.50
   3  -5  -5   22.40    1.90
  -3  -5   5   21.00    1.80
   3  -5  -5   19.60    1.60
   3  -5  -5   21.60    2.50
  -3  -5   5   22.60    2.10
   3  -5  -5   22.00    2.30
  -3  -5   5   22.70    2.40
  -3  -5   5   23.10    1.70
   3   5  -4    2.20    0.90
  -3   5   4   -0.20    1.00
   3   5  -4    1.40    1.00
  -3   5   4    3.00    1.40
  -3   5   4    1.80    1.20
   3   5  -4    2.90    1.30
  -3   5   4    2.30    0.60
   3   5  -4    2.50    0.80
   3  -5  -4    2.80    1.40
  -3  -5   4    1.60    1.00
   3  -5  -4    0.00    1.10
   3  -5  -4    3.00    1.10
  -3  -5   4    2.30    0.80
  -3  -5   4    3.10    0.90
  -3   5   3    1.00    1.00
  -3   5   3    0.00    0.90
   3   5  -3    0.20    1.10
   3   5  -3   -1.10    0.80
   3   5  -3   -1.00    0.70
  -3   5   3   -0.50    0.40
   3   5  -3    0.10    0.70
  -3   5   3   -0.10    1.10
   3  -5  -3   -0.50    1.10
   3  -5  -3    0.20    0.40
   3  -5  -3   -0.40    1.00
  -3  -5   3   -1.10    0.80
  -3  -5   3   -0.40    0.80
  -3  -5   3   -0.60    0.60
   3  -5  -3    1.50    1.20
   3   5  -2   13.80    1.80
   3   5  -2   13.40    1.70
  -3   5   2   14.60    0.60
   3   5  -2   15.00    1.20
   3   5  -2   13.90    1.90
  -3   5   2   13.80    1.80
  -3   5   2   18.10    1.90
   3   5  -2   12.20    1.40
  -3   5   2   16.90    2.10
  -3  -5   2   12.40    1.70
   3  -5  -2   14.40    0.60
   3  -5  -2   15.50    1.90
  -3  -5   2   13.40    1.10
  -3  -5   2   13.90    1.60
   3  -5  -2   11.80    1.60
   3  -5  -2   13.80    1.80
   3   5  -1   11.50    1.50
  -3   5   1   15.60    2.00
   3   5  -1   11.80    1.20
  -3   5   1   14.50    1.70
  -3   5   1   10.80    1.60
   3   5  -1   14.30    1.70
   3   5  -1   12.70    1.80
  -3  -5   1    9.70    1.30
  -3  -5   1   11.90    1.10
   3  -5  -1   16.10    1.70
   3  -5  -1   10.60    1.60
  -3  -5   1   12.30    1.60
  -3   5   0   14.70    1.80
   3   5   0   16.70    1.70
   3   5   0   14.70    1.70
  -3   5   0   13.00    1.70
   3   5   0   15.20    2.00
  -3   5   0   18.00    1.80
  -3  -5   0   15.00    1.60
   3  -5   0   14.30    0.60
   3  -5   0   14.60    1.90
   3  -5   0   15.90    1.80
   3  -5   0   15.00    0.60
  -3   5  -1   88.39    3.70
   3   5   1   88.59    3.90
  -3   5  -1   88.09    3.70
  -3   5  -1   85.09    3.60
   3   5   1   78.59    3.60
   3   5   1   83.99    3.30
   3   5   1   86.89    2.80
  -3   5  -1   73.09    3.90
  -3  -5  -1   88.19    4.00
   3  -5   1   85.99    2.50
   3  -5   1   81.79    3.60
   3  -5   1   85.59    2.50
   3  -5   1   83.99    3.60
   3   5   2   12.50    1.50
   3   5   2   13.20    1.70
   3   5   2   10.80    1.80
  -3   5  -2   10.10    1.70
  -3   5  -2   10.30    1.60
   3   5   2   10.30    1.20
   3   5   2   10.80    1.20
  -3   5  -2    9.20    1.50
   3  -5   2    9.60    1.00
  -3  -5  -2   10.70    1.40
  -3  -5  -2    8.50    1.70
   3  -5   2   10.40    1.60
   3  -5   2   10.60    1.60
   3   5   3  237.98    6.60
   3   5   3  236.98    7.60
   3   5   3  235.08    7.80
   3   5   3  222.48    7.40
   3   5   3  229.18    6.60
  -3   5  -3  236.28    7.30
  -3   5  -3  234.98    7.40
  -3   5  -3  237.88    6.50
   3   5   3  238.78    6.80
  -3   5  -3  244.38    7.50
  -3  -5  -3  228.98    6.70
   3  -5   3  236.68    7.40
  -3  -5  -3  220.88    7.60
   3  -5   3  231.88    7.40
   3  -5   3  228.58    6.50
   3   5   4   68.49    3.90
  -3   5  -4   75.09    2.90
  -3   5  -4   66.79    3.40
   3   5   4   68.99    3.00
   3   5   4   68.79    3.50
   3   5   4   67.89    3.70
   3   5   4   76.79    2.90
  -3   5  -4   68.89    3.50
  -3   5  -4   67.59    3.30
   3  -5   4   69.99    2.90
  -3  -5  -4   71.19    2.90
   3  -5   4   71.39    3.50
   3  -5   4   71.99    3.60
  -3  -5  -4   68.29    3.70
   3   5   5  419.16   11.70
  -3   5  -5  429.46   12.10
  -3   5  -5  433.56   11.50
  -3   5  -5  418.26   12.10
   3   5   5  446.26   11.20
  -3   5  -5  418.86   12.00
   3   5   5  426.06   12.40
   3  -5   5  425.06   12.00
   3  -5   5  427.56   12.10
  -3  -5  -5  426.36   11.10
   3  -5   5  411.96   12.00
  -3  -5  -5  425.06   12.70
  -3   5  -6   57.49    3.30
  -3   5  -6   53.59    3.10
   3   5   6   49.70    2.90
   3   5   6   55.19    3.60
   3   5   6   53.49    2.30
  -3   5  -6   49.10    3.20
   3  -5   6   47.90    3.20
   3  -5   6   41.60    3.30
   3  -5   6   52.29    3.10
   3  -5   6   49.20    2.80
  -3  -5  -6   49.90    2.30
  -3  -5  -6   51.59    3.60
  -3   5  -7  408.66   12.20
   3   5   7  436.86   12.80
   3   5   7  433.26   10.70
  -3   5  -7  407.06   12.00
   3   5   7  431.36   12.00
  -3   5  -7  431.16   12.50
   3  -5   7  422.16   12.20
  -3  -5  -7  399.86   12.90
   3  -5   7  417.56   12.00
  -3   5  -8   60.19    3.70
   3   5   8   65.29    2.10
   3   5   8   65.49    2.10
  -3   5  -8   62.09    3.90
   3   5   8   67.99    3.80
   3   5   8   68.59    4.10
   3  -5   8   58.89    3.60
   3  -5   8   55.09    3.40
  -3  -5  -8   53.49    4.10
  -3   5  -9  254.87    8.70
   3   5   9  248.38    8.60
   3   5   9  258.47    9.20
  -3   5  -9  254.57    9.00
  -3  -5  -9  248.08    9.40
   3  -5   9  268.67    8.90
   3  -5   9  255.77    8.40
   3   5  10   19.00    3.00
  -3   5 -10   16.80    2.70
   3   5  10   19.00    2.60
  -3   5 -10   22.80    2.90
  -3  -5 -10   20.70    3.20
   3  -5  10   21.60    2.70
   3  -5  10   24.10    3.00
   3   5  11  351.56   11.70
  -3   5 -11  350.26   12.00
  -3   5 -11  352.56   11.60
   3   5  11  368.66   12.30
   3  -5  11  359.16   11.80
  -3  -5 -11  348.37   12.40
   3  -5  11  363.96   11.10
   3   5  12   13.20    3.00
  -3   5 -12   12.20    2.80
  -3   5 -12   13.90    2.90
   3   5  12   12.10    2.60
   3  -5  12    8.90    2.80
   3  -5  12   10.90    2.40
  -3  -5 -12   14.60    3.30
  -3   5 -13  159.68    8.00
   3   5  13  146.69    7.40
  -3   5 -13  152.78    7.30
   3  -5  13  142.69    6.40
  -3  -5 -13  150.38    8.00
   3  -5  13  156.58    7.50
  -3   5 -14    3.90    2.90
  -3   5 -14   -3.10    2.80
   3   5  14    2.70    4.60
   3   5  14    7.30    2.90
   3  -5  14    2.30    2.40
   3  -5  14    1.50    3.10
  -3  -5 -14    0.80    3.20
  -3   5 -15  244.48   10.20
   3   5  15  226.98   10.40
   3   5  15  237.58   10.20
  -3  -5 -15  214.68   10.60
   3  -5  15  236.08    8.70
   3  -5  15  238.98   10.60
   3   5  16   33.00    5.10
   3   5  16   55.19    6.30
  -3   5 -16   42.90    5.60
  -3   5 -16   36.80    7.00
   3  -5  16   29.50    5.00
  -3  -5 -16   48.70    6.20
  -3   5 -17   96.79    8.60
   3   5  17   94.29    8.70
  -3   5 -17   99.39    9.20
   3   5  17  100.29    8.00
   3  -5  17   84.39    7.90
  -3  -5 -17   79.99    8.50
  -3   6  18   16.30    4.80
   3   6 -18   12.50    5.60
  -3  -6  18    0.20    4.30
   3  -6 -18   13.70    5.60
  -3   6  17    0.00    3.80
  -3   6  17   -0.70    3.40
   3   6 -17   -0.40    4.50
   3  -6 -17    2.90    4.40
  -3  -6  17   -6.00    3.80
  -3  -6  17    3.20    3.30
  -3   6  16   17.50    4.20
   3   6 -16   13.60    4.20
  -3   6  16   15.40    3.60
  -3  -6  16   15.90    4.10
  -3  -6  16   18.10    3.60
   3  -6 -16   21.70    5.00
  -3   6  15    7.40    3.20
  -3   6  15    1.40    2.60
   3   6 -15    3.60    3.20
  -3  -6  15    3.90    2.80
  -3  -6  15   10.30    3.10
   3  -6 -15    4.40    3.30
   3   6 -14    4.00    2.20
  -3   6  14    0.70    2.40
   3   6 -14    1.40    3.00
  -3   6  14    4.50    3.20
  -3  -6  14   -1.10    2.60
   3  -6 -14    5.40    3.20
  -3  -6  14   -0.80    2.30
   3   6 -13   13.30    3.30
  -3   6  13   17.40    3.30
  -3   6  13   16.80    3.00
   3   6 -13   16.70    2.40
   3  -6 -13   20.30    3.90
  -3  -6  13   12.50    2.70
  -3  -6  13   16.30    3.00
   3   6 -12   41.10    3.30
  -3   6  12   46.20    4.50
  -3   6  12   39.10    3.70
   3   6 -12   38.80    4.50
   3  -6 -12   38.90    4.70
  -3  -6  12   37.70    4.00
   3  -6 -12   38.40    1.60
  -3  -6  12   37.30    4.10
   3   6 -11   43.00    4.20
  -3   6  11   46.60    2.50
  -3   6  11   47.50    4.50
  -3   6  11   44.30    3.50
   3   6 -11   51.39    3.20
   3  -6 -11   44.00    4.50
  -3  -6  11   41.50    3.70
  -3  -6  11   45.10    3.60
  -3  -6  11   48.80    3.40
   3  -6 -11   49.20    2.40
   3   6 -10   45.50    4.10
  -3   6  10   41.10    3.90
  -3   6  10   42.90    2.70
  -3   6  10   32.20    3.00
   3  -6 -10   37.80    4.00
  -3  -6  10   42.60    3.40
   3  -6 -10   39.20    2.40
  -3  -6  10   43.40    3.80
  -3  -6  10   42.10    3.00
  -3   6   9  100.49    3.90
  -3   6   9   89.19    4.20
   3   6  -9   95.69    5.40
  -3   6   9   91.59    5.00
   3   6  -9   90.99    3.80
   3  -6  -9   89.79    5.30
  -3  -6   9   98.19    4.00
  -3  -6   9   94.99    4.50
   3  -6  -9   88.59    4.40
   3  -6  -9  101.29    3.80
  -3  -6   9   93.59    4.80
   3   6  -8   55.59    2.80
   3   6  -8   54.69    3.90
  -3   6   8   46.20    3.80
  -3   6   8   48.70    3.10
  -3   6   8   51.09    3.00
  -3  -6   8   45.40    3.60
  -3  -6   8   53.09    2.90
  -3  -6   8   50.49    3.30
   3  -6  -8   43.40    3.20
   3  -6  -8   53.39    4.00
   3   6  -7  122.59    4.90
  -3   6   7  112.69    4.70
   3   6  -7  117.49    5.60
  -3   6   7  117.49    4.50
  -3   6   7  115.09    5.30
   3   6  -7  119.99    4.20
   3  -6  -7  117.89    4.40
  -3  -6   7  125.79    4.30
  -3  -6   7  117.89    4.60
   3  -6  -7  120.79    4.40
  -3  -6   7  105.39    4.90
   3  -6  -7  115.79    5.60
   3   6  -6   34.20    2.90
  -3   6   6   31.10    2.90
  -3   6   6   31.40    2.00
  -3   6   6   35.20    2.60
   3   6  -6   33.80    2.60
   3   6  -6   32.20    2.20
  -3  -6   6   29.30    2.20
  -3  -6   6   32.70    2.40
   3  -6  -6   36.60    3.10
  -3  -6   6   31.10    2.70
   3  -6  -6   29.30    2.10
   3  -6  -6   32.50    2.40
   3   6  -5   98.19    3.80
   3   6  -5  115.39    4.10
  -3   6   5  108.79    3.50
   3   6  -5  107.89    4.80
  -3   6   5  107.09    4.80
  -3   6   5  105.59    4.30
  -3  -6   5  106.29    4.60
   3  -6  -5  106.69    4.20
   3  -6  -5  109.29    5.10
  -3  -6   5  107.49    3.90
   3  -6  -5  105.09    3.50
  -3  -6   5  112.99    4.00
   3   6  -4   58.69    2.80
   3   6  -4   59.59    3.40
  -3   6   4   57.89    3.20
  -3   6   4   60.59    3.50
  -3   6   4   55.89    2.00
  -3   6   4   64.59    4.30
   3   6  -4   58.79    2.70
  -3  -6   4   58.69    2.90
   3  -6  -4   58.19    3.50
  -3  -6   4   56.49    2.50
  -3  -6   4   53.39    3.30
   3  -6  -4   56.79    3.00
   3  -6  -4   54.29    2.00
   3   6  -3   61.69    2.50
  -3   6   3   60.19    1.70
   3   6  -3   55.79    2.90
  -3   6   3   57.69    3.40
   3   6  -3   61.49    3.50
  -3   6   3   60.49    3.20
  -3   6   3   56.09    3.50
  -3  -6   3   55.99    2.40
   3  -6  -3   60.99    3.10
   3  -6  -3   57.29    3.40
  -3  -6   3   56.69    3.20
  -3  -6   3   58.89    2.90
  -3   6   2    6.10    1.50
   3   6  -2    8.00    1.90
  -3   6   2    5.80    1.70
   3   6  -2    9.00    1.20
  -3   6   2    8.10    1.60
   3   6  -2    8.30    1.60
   3   6  -2    6.30    1.30
   3   6  -2    5.70    1.50
   3  -6  -2    8.60    1.60
   3  -6  -2    6.30    1.60
  -3  -6   2    7.20    1.40
  -3  -6   2    5.00    1.40
  -3  -6   2    5.80    0.90
   3  -6  -2    4.10    1.30
  -3   6   1  175.38    6.30
   3   6  -1  172.08    6.50
   3   6  -1  175.58    5.80
   3   6  -1  169.58    5.20
   3   6  -1  172.98    6.00
  -3   6   1  169.88    6.00
  -3   6   1  181.38    6.30
   3  -6  -1  178.08    6.20
   3  -6  -1  169.58    6.20
  -3  -6   1  176.48    4.90
   3  -6  -1  173.38    6.00
  -3  -6   1  169.48    5.90
  -3  -6   1  177.88    5.80
  -3   6   0   16.50    2.10
   3   6   0   18.00    2.10
  -3   6   0   14.60    2.00
   3   6   0   20.40    2.20
  -3   6   0   16.90    2.10
   3   6   0   20.60    2.50
   3  -6   0   15.50    2.00
   3  -6   0   16.90    2.10
  -3  -6   0   15.60    1.90
  -3   6  -1  144.39    5.50
   3   6   1  142.89    4.20
   3   6   1  145.69    4.20
   3   6   1  137.09    5.70
  -3   6  -1  146.69    5.40
  -3   6  -1  135.09    5.20
  -3   6  -1  138.69    5.30
   3   6   1  138.99    5.20
   3   6   1  143.59    5.20
   3  -6   1  140.49    3.70
  -3  -6  -1  146.29    5.10
  -3  -6  -1  140.69    5.70
   3  -6   1  145.09    5.40
   3  -6   1  144.59    3.70
   3  -6   1  138.69    5.30
   3   6   2    0.50    0.70
   3   6   2   -0.80    1.10
   3   6   2   -0.20    0.70
  -3   6  -2   -1.40    1.30
   3   6   2   -0.40    1.10
  -3   6  -2    1.00    1.10
  -3   6  -2    0.00    1.10
   3  -6   2    2.40    1.50
  -3  -6  -2   -0.90    1.00
   3  -6   2    0.40    1.10
   3  -6   2    0.90    0.60
  -3  -6  -2    2.60    1.30
  -3   6  -3  106.89    4.50
  -3   6  -3  101.09    4.30
   3   6   3  107.19    3.60
  -3   6  -3  104.09    4.50
   3   6   3  105.39    4.60
   3   6   3  111.29    4.10
   3   6   3   97.59    3.50
  -3  -6  -3  103.99    4.90
   3  -6   3   96.39    4.40
   3  -6   3  104.59    4.50
  -3  -6  -3  101.79    4.00
   3  -6   3  103.49    3.50
  -3   6  -4    2.30    1.30
  -3   6  -4    3.40    1.40
   3   6   4    1.20    1.30
  -3   6  -4   -0.90    1.00
   3   6   4    2.90    1.10
   3   6   4    3.40    1.00
   3   6   4    1.50    1.20
   3  -6   4    2.40    1.40
  -3  -6  -4    3.10    1.60
  -3  -6  -4    2.20    1.10
   3  -6   4    0.70    0.90
   3  -6   4    2.60    1.70
  -3   6  -5  236.68    6.90
   3   6   5  230.28    6.90
  -3   6  -5  229.78    7.70
   3   6   5  222.28    7.90
  -3   6  -5  228.38    7.70
   3   6   5  225.98    6.90
   3   6   5  234.48    7.10
   3  -6   5  237.98    8.50
   3  -6   5  227.38    7.70
  -3  -6  -5  209.28    8.10
  -3  -6  -5  225.68    6.80
  -3   6  -6   34.90    2.90
   3   6   6   31.30    2.50
  -3   6  -6   35.60    2.90
  -3   6  -6   41.00    2.80
   3   6   6   38.90    2.40
   3   6   6   37.00    3.30
   3  -6   6   35.10    3.00
  -3  -6  -6   39.90    3.40
  -3  -6  -6   35.90    2.30
   3  -6   6   38.50    2.60
  -3   6  -7   12.70    2.10
  -3   6  -7   15.80    2.30
   3   6   7   16.40    2.60
  -3   6  -7   15.70    2.40
   3   6   7   19.70    2.40
   3   6   7   15.40    1.90
  -3  -6  -7   16.80    2.70
  -3  -6  -7   14.00    1.70
   3  -6   7   16.20    2.30
   3  -6   7   13.90    2.00
   3   6   8   -0.30    1.50
   3   6   8    2.70    1.80
   3   6   8    0.70    1.00
  -3   6  -8    1.10    1.70
  -3   6  -8    0.10    1.60
   3  -6   8    1.20    1.50
  -3  -6  -8    2.80    2.00
   3  -6   8    0.00    1.60
   3   6   9   29.00    1.50
   3   6   9   27.10    3.20
  -3   6  -9   27.40    3.50
   3   6   9   28.90    1.40
   3   6   9   28.90    3.50
  -3   6  -9   28.30    3.20
   3  -6   9   24.10    3.00
   3  -6   9   24.80    3.10
  -3  -6  -9   28.70    3.60
   3   6  10    7.80    2.50
   3   6  10    8.60    2.10
  -3   6 -10    6.70    2.30
  -3   6 -10    7.10    2.40
  -3  -6 -10   11.00    2.80
   3  -6  10    8.00    2.10
   3  -6  10    7.40    2.00
   3   6  11   19.70    3.00
   3   6  11   15.40    3.20
  -3   6 -11   16.40    2.90
  -3   6 -11   18.70    3.00
   3  -6  11   18.60    3.00
   3  -6  11   12.80    2.60
  -3  -6 -11   19.30    3.60
   3   6  12    0.30    2.30
  -3   6 -12    2.20    2.40
  -3   6 -12    3.00    2.60
   3  -6  12    3.30    2.50
   3  -6  12    0.50    2.20
  -3  -6 -12   -0.90    2.80
  -3   6 -13   16.50    3.40
  -3   6 -13   21.30    3.80
   3   6  13   15.40    3.70
   3   6  13   19.20    3.40
   3  -6  13   17.10    3.30
  -3  -6 -13   16.20    3.80
   3  -6  13   23.40    3.20
   3   6  14    7.50    3.60
   3   6  14   16.50    3.50
  -3   6 -14   11.50    3.50
  -3   6 -14   16.60    4.10
   3  -6  14   14.30    3.10
  -3  -6 -14    9.60    3.90
   3  -6  14   14.30    3.60
  -3   6 -15   10.00    3.80
   3   6  15    8.50    3.80
  -3   6 -15    7.10    3.90
   3   6  15    0.90    3.60
  -3  -6 -15    8.50    4.00
   3  -6  15    2.10    3.00
   3  -6  15    6.40    3.50
  -3   6 -16   19.60    4.60
   3   6  16   12.30    4.60
   3   6  16    9.90    4.50
  -3   6 -16   10.30    4.60
   3  -6  16   15.20    4.60
  -3  -6 -16   12.00    4.70
   3   7 -17   44.10    6.50
  -3   7  17   31.30    5.30
  -3   7  17   32.70    4.90
  -3  -7  17   37.00    5.00
   3  -7 -17   39.20    6.40
  -3  -7  17   35.50    4.90
  -3   7  16   99.79    7.30
  -3   7  16  113.69    8.40
   3   7 -16  121.59    9.00
  -3  -7  16  125.19    8.00
  -3  -7  16   91.49    8.30
   3  -7 -16   85.89    8.10
  -3   7  15   45.80    4.90
   3   7 -15   47.20    5.80
  -3   7  15   51.69    5.70
   3  -7 -15   49.30    6.30
  -3  -7  15   55.49    5.80
  -3  -7  15   44.30    5.40
  -3   7  14   47.70    5.00
   3   7 -14   54.79    5.80
  -3   7  14   44.50    5.30
   3  -7 -14   44.20    5.60
  -3  -7  14   43.50    4.90
  -3  -7  14   43.10    4.60
   3   7 -13   31.50    3.50
   3   7 -13   26.60    4.30
  -3   7  13   37.00    4.30
  -3  -7  13   34.10    3.90
   3  -7 -13   36.70    4.80
  -3  -7  13   35.80    4.40
  -3   7  12   81.29    4.70
   3   7 -12   73.99    4.20
   3   7 -12   75.89    5.80
  -3   7  12   69.59    5.80
  -3  -7  12   78.29    5.00
   3  -7 -12   78.79    6.30
  -3  -7  12   73.59    5.10
  -3   7  11   16.50    2.50
   3   7 -11   19.70    2.30
   3   7 -11   21.30    3.50
  -3   7  11   15.50    3.00
  -3  -7  11   17.20    2.60
  -3  -7  11   16.50    2.90
   3  -7 -11   20.80    2.30
   3  -7 -11   14.80    3.30
  -3   7  10   61.49    3.60
  -3   7  10   48.60    4.30
   3   7 -10   66.49    4.90
  -3   7  10   59.39    3.80
   3   7 -10   56.09    3.50
   3  -7 -10   62.99    5.10
  -3  -7  10   62.99    4.00
  -3  -7  10   69.19    4.70
  -3  -7  10   61.79    3.80
   3  -7 -10   62.49    3.60
   3   7  -9   13.20    2.70
   3   7  -9   13.90    1.90
  -3   7   9   13.50    2.10
  -3   7   9   15.30    2.80
  -3   7   9   12.50    1.90
   3  -7  -9   11.10    2.70
  -3  -7   9   16.40    2.20
  -3  -7   9   13.50    2.00
   3  -7  -9   13.10    2.20
   3  -7  -9   12.60    1.70
  -3  -7   9   16.80    2.70
  -3   7   8   85.79    4.10
  -3   7   8   83.09    4.80
   3   7  -8   79.69    5.00
  -3   7   8   78.19    3.70
   3   7  -8   79.49    3.70
  -3  -7   8   83.99    4.00
   3  -7  -8   87.49    4.00
  -3  -7   8   86.59    3.90
  -3  -7   8   79.29    4.50
   3  -7  -8   82.09    5.10
   3  -7  -8   84.19    3.70
  -3   7   7    3.00    1.70
   3   7  -7    1.90    1.90
  -3   7   7    2.00    1.70
   3   7  -7    4.70    1.80
  -3   7   7    3.50    1.20
   3   7  -7    1.50    1.30
   3  -7  -7    1.60    1.90
  -3  -7   7    3.60    1.70
  -3  -7   7    3.50    1.30
  -3  -7   7    2.80    1.50
   3  -7  -7    2.70    1.20
   3  -7  -7    2.60    1.40
  -3   7   6   72.89    4.00
   3   7  -6   73.19    4.40
   3   7  -6   71.89    3.60
  -3   7   6   67.29    4.20
   3   7  -6   71.39    3.50
  -3   7   6   73.59    2.80
   3  -7  -6   71.29    3.50
   3  -7  -6   74.09    4.50
  -3  -7   6   81.39    3.60
   3  -7  -6   76.69    3.00
  -3  -7   6   71.09    4.10
  -3  -7   6   69.69    3.30
  -3   7   5    1.70    1.60
   3   7  -5   -1.60    1.10
   3   7  -5    0.90    1.50
  -3   7   5    0.50    0.70
  -3   7   5    1.10    1.50
   3   7  -5    0.80    1.20
  -3  -7   5    0.40    1.30
   3  -7  -5   -2.70    1.30
   3  -7  -5    1.40    1.20
  -3  -7   5    1.90    1.40
  -3  -7   5   -0.50    0.90
   3   7  -4    4.90    1.30
  -3   7   4    4.60    1.80
   3   7  -4    6.50    1.20
  -3   7   4    7.20    1.80
  -3   7   4    6.20    0.60
   3   7  -4    4.70    1.60
  -3  -7   4    5.80    1.00
   3  -7  -4    5.40    1.70
  -3  -7   4    3.50    1.50
  -3  -7   4    8.40    1.60
   3  -7  -4    5.20    1.50
   3   7  -3   -0.30    1.10
   3   7  -3    0.60    0.80
   3   7  -3    1.50    1.20
  -3   7   3    1.20    1.40
  -3  -7   3    1.70    1.40
  -3  -7   3    0.40    0.70
  -3  -7   3    0.30    1.30
   3  -7  -3    0.60    1.30
   3  -7  -3   -0.20    1.10
  -3   7   2    1.30    1.30
   3   7  -2   -1.10    1.20
   3   7  -2    0.40    0.70
   3   7  -2    0.50    1.10
   3  -7  -2    0.20    1.30
  -3  -7   2    2.40    1.50
  -3  -7   2    1.30    1.20
   3  -7  -2   -0.10    1.10
  -3  -7   2    0.40    0.60
  -3   7   1   33.30    2.90
   3   7  -1   27.10    2.40
  -3  -7   1   33.60    2.80
   3  -7  -1   31.70    2.50
  -3  -7   1   30.80    2.50
   3   7   0   40.60    2.40
  -3   7   0   42.30    3.00
   3   7   0   38.10    2.80
   3  -7   0   43.00    3.10
  -3  -7   0   47.00    2.90
   3   7   1   51.49    2.80
   3   7   1   49.40    3.20
  -3   7  -1   47.90    3.10
   3   7   1   51.09    2.00
  -3   7  -1   44.80    3.30
  -3  -7  -1   50.49    3.00
   3  -7   1   51.99    3.30
   3   7   2   64.49    3.70
  -3   7  -2   58.49    3.50
   3   7   2   69.49    2.50
   3   7   2   65.09    3.50
   3   7   2   66.89    2.50
  -3   7  -2   64.89    3.70
  -3  -7  -2   63.29    3.30
   3  -7   2   65.89    2.10
   3  -7   2   64.99    3.70
   3  -7   2   65.19    2.10
  -3  -7  -2   64.59    4.00
   3   7   3  138.89    4.30
   3   7   3  138.19    4.30
  -3   7  -3  137.19    5.60
  -3   7  -3  130.39    5.40
   3   7   3  137.59    5.20
   3   7   3  130.19    5.70
  -3  -7  -3  129.69    5.90
   3  -7   3  139.79    4.10
   3  -7   3  134.69    5.70
  -3  -7  -3  125.29    4.90
   3   7   4   96.59    3.60
  -3   7  -4   85.29    4.50
   3   7   4   94.69    4.80
   3   7   4   83.39    4.10
  -3   7  -4   94.09    4.50
   3   7   4   94.09    3.50
  -3  -7  -4   94.09    3.90
  -3  -7  -4   91.49    5.10
   3  -7   4   93.09    4.60
   3  -7   4   88.69    3.40
  -3   7  -5  161.68    6.50
   3   7   5  171.18    6.90
   3   7   5  166.88    5.90
  -3   7  -5  170.78    5.50
  -3   7  -5  175.38    6.60
   3   7   5  162.18    6.00
   3   7   5  177.58    5.60
   3  -7   5  170.48    6.60
   3  -7   5  156.98    6.00
  -3  -7  -5  177.18    5.80
  -3  -7  -5  163.58    7.00
  -3   7  -6   25.70    2.80
   3   7   6   32.50    2.80
   3   7   6   27.30    3.20
  -3   7  -6   27.10    3.00
   3   7   6   26.30    2.80
   3   7   6   26.70    2.50
  -3   7  -6   28.00    2.80
   3  -7   6   28.20    3.30
   3  -7   6   27.80    2.50
  -3  -7  -6   27.40    3.40
  -3  -7  -6   24.30    2.30
  -3   7  -7   72.89    4.10
   3   7   7   76.39    3.60
   3   7   7   70.19    4.90
  -3   7  -7   70.99    4.10
  -3   7  -7   74.59    4.60
   3   7   7   74.49    3.90
  -3  -7  -7   73.29    4.90
   3  -7   7   74.19    4.40
   3  -7   7   76.49    3.90
  -3   7  -8  214.68    8.40
  -3   7  -8  226.08    8.10
   3   7   8  227.38    6.80
   3   7   8  222.88    7.70
   3   7   8  222.48    8.80
   3  -7   8  236.68    8.60
   3  -7   8  217.78    7.70
  -3  -7  -8  227.88    6.70
  -3  -7  -8  218.58    9.00
  -3   7  -9  129.19    6.30
   3   7   9  120.19    6.30
   3   7   9  122.29    4.10
   3   7   9  123.29    5.50
  -3   7  -9  110.19    5.80
   3  -7   9  122.89    5.90
  -3  -7  -9  115.29    6.60
   3  -7   9  120.79    5.50
   3   7  10  105.99    6.30
  -3   7 -10  119.29    6.50
  -3   7 -10  116.59    6.00
   3   7  10  122.39    5.80
   3  -7  10  120.09    5.90
   3  -7  10  116.69    5.90
  -3  -7 -10  124.99    7.20
  -3   7 -11  114.19    6.20
  -3   7 -11  108.09    6.60
   3   7  11  116.19    6.00
   3  -7  11  105.59    6.00
  -3  -7 -11  108.39    6.80
   3  -7  11  120.29    6.10
   3   7  12  134.29    6.80
  -3   7 -12  120.19    7.00
  -3   7 -12  147.19    7.70
   3   7  12  144.69    7.70
   3  -7  12  139.29    7.00
  -3  -7 -12  139.59    8.30
   3  -7  12  144.89    7.30
  -3   7 -13   88.59   11.00
   3   7  13  125.89    6.90
  -3   7 -13  122.59    7.00
   3   7  13  113.19    7.30
   3  -7  13  116.39    6.70
   3  -7  13  122.49    7.30
  -3  -7 -13  109.79    7.70
   3   7  14   86.09    6.90
  -3   7 -14  101.49    7.20
   3   7  14   97.49    7.30
  -3   7 -14   91.89    7.50
   3  -7  14   86.89    6.60
   3  -7  14   92.19    6.40
  -3  -7 -14   87.29    8.10
   3   7  15   34.70    5.70
   3   7  15   28.90    4.90
  -3   7 -15   25.20    4.80
  -3  -7 -15   35.80    5.90
   3  -7  15   35.10    5.00
   3  -7  15   30.20    4.80
   3   7  16   44.50    5.80
  -3   7 -16   40.00    6.30
   3   7  16   27.20    5.80
  -3  -7 -16   34.40    6.40
   3  -7  16   39.70    5.70
  -3   8  16   30.30    5.50
   3   8 -16   39.20    6.30
  -3   8  16   31.70    4.70
   3  -8 -16   30.20    5.80
  -3  -8  16   25.00    4.70
  -3  -8  16   33.10    4.60
  -3   8  15   -0.40    3.70
   3   8 -15   10.10    4.30
  -3   8  15    0.90    3.80
  -3  -8  15    6.90    3.50
   3  -8 -15    7.80    4.40
  -3  -8  15    0.60    3.30
  -3   8  14   56.69    6.00
   3   8 -14   53.09    6.90
  -3   8  14   40.30    4.30
  -3  -8  14   49.90    5.50
   3  -8 -14   39.60    5.50
   3   8 -13   11.20    3.50
  -3   8  13    1.90    2.60
  -3   8  13    2.80    3.00
  -3  -8  13    4.30    3.40
  -3  -8  13    5.30    2.80
   3  -8 -13    4.70    3.70
   3   8 -12   45.30    3.90
  -3   8  12   51.69    5.10
  -3   8  12   37.00    4.10
   3   8 -12   48.70    5.20
   3  -8 -12   43.50    5.60
  -3  -8  12   44.40    4.40
  -3  -8  12   40.40    4.80
   3   8 -11   -0.40    2.60
  -3   8  11    0.00    2.00
   3   8 -11    2.20    1.90
  -3   8  11    1.20    2.50
  -3  -8  11    4.70    2.60
   3  -8 -11    4.10    3.20
   3  -8 -11    3.50    1.60
  -3  -8  11    3.60    2.10
  -3   8  10   86.39    4.40
  -3   8  10   93.39    5.80
   3   8 -10   88.69    4.40
   3   8 -10   83.79    5.90
   3  -8 -10   85.29    6.00
   3  -8 -10   89.19    4.10
  -3  -8  10   86.19    4.70
  -3  -8  10   89.39    5.40
  -3   8   9    0.90    2.30
   3   8  -9    5.50    1.80
  -3   8   9    1.40    2.30
  -3   8   9    2.60    1.60
   3   8  -9    4.00    2.60
  -3  -8   9    0.10    2.00
   3  -8  -9    1.50    2.40
  -3  -8   9    0.90    1.60
   3  -8  -9    0.60    1.60
  -3   8   8   87.49    3.80
  -3   8   8   83.79    5.30
   3   8  -8   82.49    5.30
   3   8  -8   82.19    4.10
   3  -8  -8   90.99    5.60
   3  -8  -8   90.39    4.20
  -3  -8   8   87.39    4.20
   3  -8  -8   80.59    3.90
  -3  -8   8   87.29    5.20
  -3  -8   8   83.49    4.50
   3   8  -7    0.50    1.90
  -3   8   7    1.10    1.90
  -3   8   7    2.40    1.20
   3   8  -7    4.10    2.10
   3   8  -7    4.20    1.60
   3  -8  -7    0.00    1.20
   3  -8  -7    6.70    2.20
  -3  -8   7    1.50    1.40
   3  -8  -7    2.40    1.50
  -3  -8   7    4.90    2.00
  -3  -8   7    5.80    2.00
   3   8  -6  146.39    5.40
   3   8  -6  139.59    6.60
  -3   8   6  139.69    6.40
   3   8  -6  147.49    5.20
  -3   8   6  144.09    4.30
  -3  -8   6  135.39    5.60
   3  -8  -6  141.29    5.60
   3  -8  -6  135.69    6.60
  -3  -8   6  139.19    6.20
  -3  -8   6  144.59    5.00
   3   8  -5    2.50    1.50
  -3   8   5    1.40    0.50
   3   8  -5    7.10    2.20
  -3   8   5    2.70    0.60
   3   8  -5    5.40    1.50
  -3   8   5    4.40    2.00
   3  -8  -5    4.90    2.10
   3  -8  -5    3.80    1.60
  -3  -8   5    1.50    1.90
  -3  -8   5    2.10    1.20
  -3  -8   5    3.80    1.90
   3   8  -4  233.68    7.60
   3   8  -4  229.98    8.60
  -3   8   4  227.98    8.50
   3   8  -4  245.58    6.80
   3  -8  -4  236.48    8.00
  -3  -8   4  238.48    6.70
   3  -8  -4  235.08    8.90
  -3  -8   4  218.68    7.60
  -3  -8   4  240.28    8.40
   3   8  -3    8.70    1.20
   3   8  -3    8.40    1.70
   3   8  -3    8.80    2.10
  -3   8   3    4.50    1.90
  -3  -8   3   10.60    2.10
  -3  -8   3    7.30    1.10
   3  -8  -3    8.40    2.10
  -3  -8   3    8.20    2.00
   3  -8  -3    8.80    1.90
   3   8  -2  187.68    7.50
  -3   8   2  201.88    7.80
   3   8  -2  199.08    7.00
   3  -8  -2  195.48    7.20
   3  -8  -2  208.88    7.80
  -3  -8   2  209.88    7.70
  -3  -8   2  202.18    7.40
  -3  -8   2  208.08    5.50
   3   8  -1    0.60    1.50
   3   8  -1    3.50    1.60
  -3   8   1    2.60    1.70
   3   8  -1    0.50    0.70
   3  -8  -1   -0.50    1.40
  -3  -8   1    1.10    1.50
  -3   8   0  172.68    6.90
   3   8   0  188.78    4.90
   3   8   0  185.18    4.90
   3   8   0  180.98    6.80
  -3  -8   0  189.68    6.90
   3  -8   0  171.68    6.80
   3   8   1    0.00    0.70
   3   8   1    0.70    0.60
  -3   8  -1    0.20    1.50
   3   8   1    1.80    1.60
  -3   8  -1    2.20    1.60
   3  -8   1    0.80    1.60
  -3  -8  -1   -1.70    1.40
   3   8   2  198.88    5.90
   3   8   2  211.78    5.70
  -3   8  -2  214.38    7.60
  -3   8  -2  196.38    7.60
   3   8   2  208.88    7.60
  -3  -8  -2  206.08    7.30
   3  -8   2  211.08    7.70
   3   8   3   92.99    3.40
  -3   8  -3   93.39    4.80
   3   8   3  100.09    3.40
  -3   8  -3  104.09    5.00
   3   8   3   93.59    5.10
  -3  -8  -3  100.49    5.40
   3  -8   3  100.39    5.20
   3  -8   3   91.99    3.00
  -3  -8  -3   94.59    4.40
  -3   8  -4    5.90    1.90
   3   8   4    6.70    1.40
   3   8   4    5.90    1.20
  -3   8  -4    5.20    1.90
   3   8   4    9.20    2.20
   3  -8   4    5.80    1.20
  -3  -8  -4    9.00    2.40
   3  -8   4    4.00    2.00
  -3  -8  -4    5.40    1.60
  -3   8  -5    4.10    1.70
   3   8   5    4.50    2.20
   3   8   5    1.80    1.40
  -3   8  -5    4.90    2.00
  -3  -8  -5    0.40    1.40
   3  -8   5    3.20    1.30
  -3  -8  -5    7.70    2.30
   3  -8   5    3.50    1.90
   3   8   6  117.69    6.00
   3   8   6  120.99    4.70
   3   8   6  116.59    4.80
  -3   8  -6  126.09    6.00
  -3   8  -6  117.09    5.60
   3   8   6  112.49    5.30
  -3  -8  -6  123.19    6.40
   3  -8   6  117.39    5.80
  -3  -8  -6  116.29    4.80
   3  -8   6  125.49    4.70
   3   8   7    5.60    2.10
  -3   8  -7    2.90    2.10
  -3   8  -7    4.10    2.20
   3   8   7    6.00    1.70
   3   8   7    7.20    2.10
  -3   8  -7    4.90    2.20
   3   8   7    4.20    2.30
   3  -8   7    1.40    2.10
  -3  -8  -7    7.90    2.60
  -3  -8  -7    2.60    1.50
   3  -8   7    4.30    1.70
   3   8   8   53.99    4.70
  -3   8  -8   52.79    4.30
   3   8   8   50.69    3.60
  -3   8  -8   42.70    4.20
   3  -8   8   53.89    4.40
  -3  -8  -8   53.49    5.20
  -3  -8  -8   49.90    3.10
   3  -8   8   46.90    3.60
  -3   8  -9    1.70    2.20
   3   8   9    2.70    2.00
  -3   8  -9    2.80    2.10
   3   8   9    6.00    2.70
   3  -8   9    3.40    2.50
  -3  -8  -9    4.50    1.70
  -3  -8  -9   10.20    2.90
   3  -8   9    3.70    2.10
  -3   8 -10   32.30    3.90
   3   8  10   25.10    4.70
  -3   8 -10   35.20    4.30
   3   8  10   27.10    3.20
  -3  -8 -10   25.00    6.50
   3  -8  10   32.60    4.10
   3  -8  10   28.20    3.30
  -3   8 -11    4.50    2.70
   3   8  11   10.80    2.70
   3   8  11    1.40    3.00
  -3   8 -11    3.90    2.90
   3  -8  11    4.80    2.60
   3  -8  11    8.20    2.60
  -3  -8 -11    5.20    3.10
   3   8  12   15.00    3.80
  -3   8 -12   17.30    3.50
   3   8  12   14.80    3.00
  -3   8 -12   12.80    4.30
   3  -8  12   17.40    3.50
  -3  -8 -12   17.80    4.30
   3  -8  12   14.30    3.20
   3   8  13    8.00    3.00
  -3   8 -13    8.10    3.70
   3   8  13    5.30    3.80
  -3   8 -13    8.20    3.70
  -3  -8 -13   11.80    4.30
   3  -8  13    5.60    3.30
   3   8  14    4.50    4.20
  -3   8 -14   -2.10    3.90
   3   8  14   -1.40    3.30
  -3   8 -14   -6.10    3.90
   3  -8  14   -2.80    3.50
  -3  -8 -14    0.40    4.10
   3  -8  14    2.40    3.60
   3   8  15   12.40    4.90
   3   8  15   16.90    4.20
  -3   8 -15   17.70    5.20
   3  -8  15   10.60    4.30
  -3  -8 -15    6.40    5.30
   3  -8  15   11.80    4.40
   3   9 -15    7.10    4.70
  -3   9  15   16.00    4.70
   3  -9 -15   17.20    5.60
  -3  -9  15    8.80    4.00
  -3  -9  15   18.10    4.50
   3   9 -14   77.99    8.00
  -3   9  14   62.49    7.10
  -3  -9  14   76.59    6.40
   3  -9 -14   70.69    7.60
  -3  -9  14   71.99    6.80
  -3   9  13   52.89    6.70
  -3   9  13   48.30    4.90
   3   9 -13   39.90    5.40
  -3  -9  13   37.60    4.80
   3  -9 -13   46.90    6.10
  -3  -9  13   47.20    5.20
  -3   9  12   32.10    4.10
   3   9 -12   23.50    4.50
  -3   9  12   23.00    4.20
   3  -9 -12   24.20    4.60
  -3  -9  12   20.50    3.30
  -3  -9  12   24.10    4.00
  -3   9  11    7.90    2.30
  -3   9  11    4.70    3.00
   3   9 -11    9.70    2.40
   3   9 -11    7.10    3.20
  -3  -9  11    7.00    3.70
   3  -9 -11    9.50    3.50
   3  -9 -11    8.30    2.10
  -3  -9  11    6.90    2.50
  -3   9  10   36.50    4.60
   3   9 -10   40.60    3.90
  -3   9  10   46.30    3.60
  -3  -9  10   38.00    4.60
   3  -9 -10   36.10    5.70
   3  -9 -10   48.50    3.60
  -3  -9  10   44.30    4.00
  -3   9   9   14.30    2.00
   3   9  -9   20.00    3.60
  -3   9   9   21.60    3.50
   3   9  -9   16.90    2.60
   3  -9  -9   11.00    3.30
   3  -9  -9   17.90    2.40
  -3  -9   9   17.60    3.30
  -3  -9   9   16.60    2.40
   3   9  -8   17.70    3.30
   3   9  -8   20.90    2.60
  -3   9   8   19.70    3.40
  -3   9   8   25.50    2.30
   3  -9  -8   24.70    3.00
   3  -9  -8   19.90    3.60
  -3  -9   8   25.40    2.80
  -3  -9   8   19.60    3.10
  -3   9   7    5.10    1.00
   3   9  -7    4.90    1.90
   3   9  -7    5.50    2.70
  -3   9   7    5.00    2.50
   3   9  -7    4.70    2.30
  -3  -9   7    4.10    2.20
  -3  -9   7    3.40    1.60
   3  -9  -7    6.10    1.90
   3  -9  -7    8.50    2.80
  -3   9   6   -0.60    2.20
   3   9  -6    2.00    1.70
   3   9  -6    2.50    2.20
   3   9  -6    2.30    1.70
  -3  -9   6   -3.50    2.00
   3  -9  -6   -0.50    2.10
  -3  -9   6    0.10    1.20
   3  -9  -6    3.70    1.70
   3   9  -5    3.50    1.70
   3   9  -5   -0.70    1.90
  -3   9   5    3.10    2.20
   3   9  -5   -0.10    1.40
   3  -9  -5    0.90    2.20
  -3  -9   5   -0.30    1.10
  -3  -9   5   -1.00    1.90
   3  -9  -5    0.90    1.70
   3   9  -4   -2.10    1.70
   3   9  -4    0.30    1.50
  -3   9   4   -1.10    1.70
   3   9  -4    3.50    1.10
   3  -9  -4    0.10    1.70
  -3  -9   4   -1.00    1.70
  -3  -9   4    0.30    0.90
   3  -9  -4    3.40    2.20
   3   9  -3   -1.00    1.60
  -3   9   3    1.60    2.00
   3   9  -3   -0.50    1.50
   3  -9  -3    1.70    1.90
   3  -9  -3    0.40    1.60
  -3  -9   3    1.10    0.80
  -3  -9   3   -2.40    1.40
   3   9  -2   28.20    1.40
  -3   9   2   30.60    3.40
   3   9  -2   28.50    3.30
   3   9  -2   25.60    2.80
   3  -9  -2   22.60    2.80
  -3  -9   2   30.60    3.20
   3   9  -1    0.70    1.70
  -3   9   1   -0.50    1.80
   3   9  -1   -1.10    1.60
  -3  -9   1   -0.30    1.60
   3  -9  -1    0.40    1.60
   3   9   0   54.29    3.80
  -3   9   0   51.39    4.00
   3  -9   0   55.49    4.00
  -3  -9   0   57.19    4.10
  -3   9  -1    0.70    1.80
   3   9   1    2.80    1.80
  -3   9  -1    3.50    2.00
   3  -9   1   -0.80    1.70
  -3  -9  -1    0.20    1.60
   3   9   2   62.19    2.10
  -3   9  -2   63.19    4.20
   3   9   2   59.89    2.10
  -3   9  -2   64.99    4.40
   3   9   2   64.59    4.30
  -3  -9  -2   57.59    3.80
   3  -9   2   60.39    4.30
   3   9   3    3.50    0.90
  -3   9  -3    1.70    1.70
  -3   9  -3    3.80    2.10
   3   9   3    5.10    2.10
   3  -9   3    2.50    2.00
  -3  -9  -3    1.80    1.60
  -3  -9  -3    1.60    2.10
   3   9   4   75.59    3.10
  -3   9  -4   74.79    4.60
  -3   9  -4   69.89    4.60
   3   9   4   76.19    3.00
   3   9   4   67.79    4.90
   3  -9   4   72.09    2.70
  -3  -9  -4   79.69    5.30
   3  -9   4   76.59    4.90
  -3  -9  -4   70.89    4.10
   3  -9   4   75.59    2.80
   3   9   5   64.59    4.70
   3   9   5   66.59    3.30
  -3   9  -5   59.19    4.50
  -3   9  -5   61.19    4.40
   3   9   5   66.09    3.10
   3  -9   5   61.59    2.90
   3  -9   5   65.89    4.70
  -3  -9  -5   61.29    5.00
  -3  -9  -5   63.99    4.00
   3   9   6  208.08    8.60
   3   9   6  210.18    6.70
  -3   9  -6  199.98    8.00
  -3   9  -6  212.58    8.60
  -3  -9  -6  208.68    9.30
   3  -9   6  203.28    6.60
   3  -9   6  205.58    8.40
  -3  -9  -6  194.48    7.20
  -3   9  -7   53.29    4.80
   3   9   7   41.20    3.30
   3   9   7   40.60    4.50
  -3   9  -7   44.00    4.20
  -3  -9  -7   39.40    3.40
  -3  -9  -7   37.30    4.80
   3  -9   7   43.80    3.30
   3  -9   7   50.59    4.50
   3   9   8  152.18    5.90
  -3   9  -8  145.79    6.90
  -3   9  -8  139.19    7.30
   3   9   8  133.19    7.30
   3  -9   8  136.99    5.80
   3  -9   8  140.69    7.10
  -3  -9  -8  149.59    7.90
  -3  -9  -8  144.19    5.60
   3   9   9   14.00    2.50
  -3   9  -9   10.90    3.00
   3   9   9   14.00    3.50
  -3   9  -9   12.80    3.10
   3  -9   9   12.00    3.10
  -3  -9  -9    3.60    3.20
  -3  -9  -9   14.00    2.10
   3  -9   9   11.00    2.40
  -3   9 -10  170.48    8.10
  -3   9 -10  184.38    8.70
   3   9  10  181.48    9.10
   3   9  10  171.48    7.10
   3  -9  10  158.58    9.30
  -3  -9 -10  164.98    9.30
   3  -9  10  172.38    7.30
   3   9  11    8.50    3.70
  -3   9 -11   18.10    3.60
  -3   9 -11   17.20    3.90
   3   9  11   15.60    3.20
   3  -9  11   20.40    3.80
   3  -9  11   15.00    3.20
  -3  -9 -11   19.50    4.50
  -3   9 -12   82.19    6.80
  -3   9 -12   81.09    6.80
   3   9  12   85.99    6.30
   3   9  12   86.99    7.20
   3  -9  12   86.89    6.90
   3  -9  12   67.99    6.30
  -3  -9 -12   82.09    8.10
  -3   9 -13   18.70    4.60
   3   9  13    6.10    4.30
   3   9  13   13.30    3.70
  -3   9 -13    8.10    4.60
   3  -9  13    8.50    4.10
  -3  -9 -13    4.40    4.80
   3  -9  13    1.10    3.60
   3   9  14   73.29    8.90
  -3   9 -14   69.09    8.50
   3   9  14   84.39    7.30
   3  -9  14   86.89    7.70
  -3  -9 -14   89.89    8.90
   3  -9  14   87.99    7.60
   3  10 -14    6.20    4.80
  -3  10  14    8.10    4.80
  -3 -10  14    9.40    4.00
   3 -10 -14   10.80    5.50
  -3 -10  14    5.10    4.50
   3  10 -13   47.90    6.40
  -3  10  13   40.40    5.60
   3 -10 -13   27.50    5.80
  -3 -10  13   35.90    5.20
  -3 -10  13   36.50    4.30
   3  10 -12    5.20    3.80
  -3  10  12    5.40    3.90
   3 -10 -12    5.80    4.20
  -3 -10  12    7.50    2.90
  -3 -10  12    4.20    3.50
  -3  10  11  110.59    7.60
   3  10 -11  128.39    8.10
  -3 -10  11  115.99    7.50
  -3 -10  11  112.39    6.00
   3 -10 -11  112.79    8.50
   3  10 -10    1.60    2.40
   3  10 -10    0.10    3.20
  -3  10  10    0.00    2.90
  -3 -10  10    1.50    2.10
   3 -10 -10   -1.90    3.00
   3 -10 -10    6.20    2.30
  -3 -10  10    0.30    3.10
   3  10  -9   64.69    4.70
   3  10  -9   72.49    6.00
  -3  10   9   74.19    5.90
  -3 -10   9   64.49    4.20
   3 -10  -9   71.29    6.20
   3 -10  -9   83.49    4.90
  -3 -10   9   67.39    5.60
  -3  10   8   11.50    3.40
   3  10  -8   15.50    2.70
  -3 -10   8    9.80    3.80
  -3 -10   8   11.60    2.10
   3 -10  -8    9.90    2.50
   3  10  -7  139.99    6.10
  -3  10   7  132.09    7.20
   3  10  -7  140.79    7.30
  -3 -10   7  137.69    7.10
   3 -10  -7  133.99    6.20
   3 -10  -7  137.99    7.90
  -3 -10   7  131.09    5.00
  -3  10   6    7.80    2.80
   3  10  -6    5.60    2.70
   3  10  -6    5.10    2.30
   3 -10  -6    9.40    2.40
  -3 -10   6    4.20    2.50
   3 -10  -6    3.40    2.70
  -3  10   5  235.18    9.40
   3  10  -5  221.68    8.20
   3  10  -5  224.98    9.40
  -3 -10   5  228.58    6.50
  -3 -10   5  227.28    9.20
   3 -10  -5  229.08    8.40
   3 -10  -5  230.88    9.70
  -3  10   4   24.70    3.70
   3  10  -4   21.90    3.40
   3  10  -4   27.80    3.50
   3 -10  -4   34.50    3.80
   3 -10  -4   27.50    3.90
  -3 -10   4   24.90    1.70
  -3 -10   4   26.40    3.40
   3  10  -3   73.29    4.60
  -3  10   3   91.69    5.70
   3  10  -3   77.69    5.60
  -3 -10   3   87.39    5.40
   3 -10  -3   77.49    4.90
   3  10  -2   30.80    3.90
   3  10  -2   30.90    3.70
  -3  10   2   32.30    4.00
  -3 -10   2   32.80    3.80
   3 -10  -2   37.00    4.00
   3  10  -1  151.78    6.80
  -3  10   1  155.68    7.50
   3  10  -1  161.48    7.40
  -3 -10   1  152.58    7.00
   3 -10  -1  164.58    7.20
   3  10   0   68.59    4.90
   3  10   0   59.69    4.40
  -3  10   0   61.69    5.10
  -3  10   0   66.49    4.90
  -3 -10   0   59.49    4.40
   3 -10   0   60.39    4.50
  -3  10  -1   45.90    4.10
  -3  10  -1   44.70    4.20
   3  10   1   37.00    4.00
   3 -10   1   50.09    4.20
  -3 -10  -1   40.70    4.00
  -3  10  -2    1.70    2.20
   3  10   2    0.30    2.40
  -3  10  -2    1.90    2.30
   3 -10   2   -0.50    2.10
  -3 -10  -2    3.50    2.10
   3  10   3  177.38    7.70
  -3  10  -3  160.18    7.40
  -3  10  -3  177.08    7.50
  -3 -10  -3  171.08    7.10
   3 -10   3  168.78    7.60
   3  10   4   33.70    4.00
  -3  10  -4   39.50    4.00
   3  10   4   35.30    1.80
  -3  10  -4   30.80    3.70
  -3 -10  -4   37.00    4.70
   3 -10   4   37.80    4.30
  -3 -10  -4   35.50    3.80
  -3  10  -5   58.99    4.70
  -3  10  -5   50.79    4.60
   3  10   5   51.89    5.10
   3  10   5   51.09    2.60
  -3 -10  -5   51.59    4.00
   3 -10   5   48.60    2.60
  -3 -10  -5   44.90    4.90
   3 -10   5   51.09    4.80
  -3  10  -6   30.50    3.70
   3  10   6   20.40    3.60
  -3  10  -6   27.50    3.70
   3  10   6   24.70    2.70
   3 -10   6   24.50    2.60
   3 -10   6   26.40    3.70
  -3 -10  -6   34.80    3.60
   3  10   7   36.90    3.20
  -3  10  -7   32.00    4.30
   3  10   7   31.20    4.20
  -3  10  -7   34.20    4.40
   3 -10   7   34.00    3.10
  -3 -10  -7   41.10    3.80
  -3 -10  -7   29.30    4.40
   3 -10   7   27.30    4.00
  -3  10  -8   20.20    3.60
   3  10   8   19.20    3.70
   3  10   8   26.00    2.70
  -3  10  -8   22.00    3.60
   3 -10   8   18.30    2.60
   3 -10   8   17.90    3.60
  -3 -10  -8   18.80    4.10
  -3 -10  -8   19.40    2.80
   3  10   9    6.70    2.40
   3  10   9    0.90    3.00
  -3  10  -9    7.10    4.00
  -3  10  -9    1.60    3.20
   3 -10   9    2.20    2.90
   3 -10   9    4.00    2.30
  -3 -10  -9    9.50    3.80
   3  10  10   24.00    3.70
  -3  10 -10   12.80    3.80
  -3  10 -10   16.60    3.70
   3  10  10   22.70    4.40
  -3 -10 -10   22.30    4.70
   3 -10  10   20.10    3.90
   3 -10  10   14.60    3.10
  -3  10 -11   -1.30    3.40
  -3  10 -11   -1.00    3.60
   3  10  11   -1.00    3.60
   3 -10  11   -1.90    4.70
   3 -10  11   -2.70    3.60
  -3 -10 -11    1.70    4.50
   3  10  12    6.10    4.20
  -3  10 -12   11.20    4.40
  -3  10 -12    5.20    4.60
  -3 -10 -12    1.80    4.70
   3 -10  12    6.50    4.20
  -3  10 -13    2.20    4.70
   3  10  13    4.50    4.50
   3 -10  13    4.10    4.70
  -3 -10 -13   -3.20    4.70
  -3  11  13   34.30    6.00
   3  11 -13   40.80    6.40
   3 -11 -13   37.20    6.60
  -3 -11  13   34.00    5.80
  -3  11  12    3.60    4.00
   3  11 -12    1.80    4.30
  -3 -11  12    0.00    3.80
   3 -11 -12   -0.50    4.40
   3  11 -11   52.49    6.50
  -3  11  11   51.69    6.60
  -3 -11  11   65.19    6.50
   3 -11 -11   71.39    7.50
   3  11 -10   -2.20    3.80
  -3  11  10    0.80    3.40
   3 -11 -10   -1.60    4.00
  -3 -11  10    1.30    3.40
   3  11  -9   22.90    3.50
   3  11  -9   28.90    4.80
  -3  11   9   23.00    4.20
   3 -11  -9   22.80    3.30
   3 -11  -9   22.80    4.80
  -3 -11   9   19.70    4.20
   3  11  -8   -1.20    3.00
  -3  11   8   -2.40    2.80
   3  11  -8   -0.60    2.60
   3 -11  -8    4.90    2.70
  -3 -11   8    0.50    3.10
   3 -11  -8    6.80    3.90
  -3  11   7    7.10    3.10
   3  11  -7    6.40    2.70
   3  11  -7    6.70    3.20
   3 -11  -7    6.70    3.40
   3 -11  -7    7.30    2.70
  -3 -11   7    5.80    3.20
   3  11  -6    8.60    2.70
   3  11  -6    4.20    2.90
  -3  11   6    5.90    3.20
  -3 -11   6    6.70    3.20
   3 -11  -6    6.40    2.60
   3 -11  -6   12.50    3.50
   3  11  -5    9.10    2.60
   3  11  -5   10.10    3.20
  -3  11   5    7.80    4.10
  -3 -11   5    1.40    2.50
   3 -11  -5    6.30    2.60
  -3  11   4   13.60    3.20
   3  11  -4   12.70    2.80
   3 -11  -4   12.40    3.00
  -3  11   3    0.90    2.60
   3  11  -3    0.20    2.50
   3  11  -3    3.20    2.40
   3 -11  -3   -2.50    2.30
  -3 -11   3    0.60    2.50
   3  11  -2    7.90    2.60
  -3  11   2    8.60    2.90
   3  11  -2    6.10    2.70
   3 -11  -2    7.90    2.60
  -3 -11   2    8.10    2.70
  -3  11   1   -0.50    2.60
   3  11  -1    6.10    2.60
   3  11  -1    0.40    2.50
  -3 -11   1    2.10    2.40
   3 -11  -1    5.00    2.60
   3  11   0    0.70    2.30
  -3  11   0   -1.80    2.30
  -3  11   0   -0.30    2.40
   3  11   0    1.10    2.40
  -3 -11   0    2.10    2.30
   3 -11   0   -0.60    2.30
  -3  11  -1   11.30    3.10
  -3  11  -1    9.70    2.80
   3  11   1   14.20    3.20
  -3 -11  -1   15.40    2.90
   3 -11   1   14.60    3.10
   3  11   2   -2.60    2.30
  -3  11  -2   -3.00    2.60
  -3  11  -2    1.40    2.50
   3 -11   2    3.30    3.00
  -3 -11  -2    0.30    2.30
  -3  11  -3   66.49    5.20
  -3  11  -3   43.20    4.70
   3  11   3   49.40    5.30
   3 -11   3   54.19    5.90
  -3 -11  -3   59.49    4.40
  -3  11  -4    0.00    2.70
   3  11   4    3.50    2.80
  -3  11  -4   -2.30    2.50
   3 -11   4    5.00    2.80
  -3 -11  -4    2.20    2.40
  -3  11  -5   88.29    6.00
   3  11   5   89.09    6.30
  -3  11  -5  101.19    6.30
  -3 -11  -5   93.19    5.40
   3 -11   5   97.29    6.40
   3  11   6   -0.50    3.00
  -3  11  -6   -0.40    3.10
  -3 -11  -6    6.80    2.70
  -3 -11  -6    4.40    3.40
   3 -11   6    5.10    3.20
  -3  11  -7   69.59    6.00
  -3  11  -7   81.49    6.20
   3  11   7   66.19    6.60
   3 -11   7   77.89    6.20
  -3 -11  -7   65.79    6.60
  -3 -11  -7   60.99    5.00
   3  11   8   -1.30    3.10
  -3  11  -8    6.70    3.40
  -3  11  -8   -2.70    3.20
  -3 -11  -8   -0.10    2.60
  -3 -11  -8    0.60    3.80
   3 -11   8   -0.40    3.30
  -3  11  -9   66.69    6.30
   3  11   9   46.30    5.80
  -3  11  -9   78.29    6.90
  -3 -11  -9   48.20    6.20
   3 -11   9   67.39    7.20
  -3  11 -10   -0.20    3.70
  -3  11 -10   -1.30    4.00
   3  11  10   -0.20    4.00
   3 -11  10   -0.80    4.10
  -3 -11 -10   -3.20    4.10
  -3  11 -11   77.69    7.40
   3  11  11   79.09    7.70
  -3  11 -11   73.79    7.90
   3 -11  11   72.89    8.00
  -3 -11 -11   69.09    9.00
   3  12 -11   16.80    5.10
  -3  12  11   18.20    5.10
   3 -12 -11   24.60    6.20
  -3 -12  11   15.00    4.90
   3  12 -10   40.00    5.80
  -3  12  10   29.50    5.50
   3 -12 -10   42.00    6.30
  -3 -12  10   34.70    5.50
   3  12  -9   53.09    6.50
  -3  12   9   43.90    5.70
   3 -12  -9   47.90    6.40
  -3 -12   9   42.90    5.60
   3 -12  -9   49.70    5.60
  -3  12   8   80.29    7.30
   3  12  -8   90.89    7.40
   3  12  -8   84.19    6.80
   3 -12  -8   92.69    8.40
   3 -12  -8   71.79    6.20
  -3 -12   8   66.19    6.70
  -3  12   7   55.79    6.30
   3  12  -7   58.59    5.70
   3  12  -7   65.59    6.50
   3 -12  -7   63.19    5.60
  -3 -12   7   63.69    6.30
   3 -12  -7   76.69    7.10
   3  12  -6   26.80    4.00
   3  12  -6   24.30    4.40
  -3  12   6   48.00    5.80
   3 -12  -6   31.60    3.90
  -3 -12   6   32.30    4.60
   3 -12  -6   25.80    4.60
  -3  12   5   33.60    4.80
   3  12  -5   28.40    4.00
   3  12  -5   26.10    4.80
  -3 -12   5   27.30    4.10
   3 -12  -5   29.60    3.90
   3  12  -4   78.39    6.40
  -3  12   4   82.49    6.60
   3  12  -4   81.39    6.00
  -3 -12   4   85.19    6.30
  -3  12   3   75.99    6.70
   3  12  -3   69.29    5.60
   3  12  -3   77.39    6.30
   3 -12  -3   58.09    6.50
  -3 -12   3   75.19    6.30
  -3  12   2   66.59    6.50
   3  12  -2   59.29    5.20
   3  12  -2   70.19    6.40
   3 -12  -2   75.79    5.50
  -3 -12   2   65.49    5.50
  -3  12   1   26.30    4.00
   3  12  -1   23.70    4.10
  -3  12   1   25.50    4.30
   3  12  -1   22.10    3.80
   3 -12  -1   32.30    4.20
  -3 -12   1   33.10    4.40
   3  12   0  100.19    7.10
   3  12   0   94.69    6.50
  -3  12   0   84.59    7.20
  -3  12   0   88.69    6.20
  -3 -12   0  101.39    6.10
   3 -12   0   92.39    6.30
   3  12   1   73.19    6.20
  -3  12  -1   79.29    6.00
   3  12   1   81.69    5.90
   3 -12   1   84.69    6.00
  -3  12  -2   39.80    5.00
   3 -12   2   32.80    4.40
  -3 -12  -2   33.90    5.20
  -3  12  -3   94.79    6.60
   3  12   3   78.59    6.30
   3 -12   3   94.49    6.90
  -3 -12  -3   92.59    6.30
  -3  12  -4   17.00    3.80
   3  12   4   17.00    3.90
  -3 -12  -4   18.90    3.60
   3 -12   4   23.30    4.30
   3  12   5   67.89    6.70
  -3  12  -5   74.99    6.50
  -3  12  -5   74.89    9.00
  -3 -12  -5   66.19    5.60
   3 -12   5   70.99    6.80
  -3  12  -6   15.90    3.70
  -3  12  -6   19.40    4.20
   3  12   6   23.80    4.60
   3 -12   6   25.60    4.40
  -3 -12  -6   22.40    3.80
   3  12   7   18.50    4.80
  -3  12  -7   25.50    4.50
  -3  12  -7   15.50    4.30
   3 -12   7   19.70    4.50
  -3 -12  -7   25.10    3.90
  -3 -12  -7   17.70    5.20
   3  12   8    5.40    4.10
  -3  12  -8   -0.80    3.90
  -3  12  -8    6.90    4.10
  -3 -12  -8    1.80    4.40
   3 -12   8   -2.30    3.70
   3  12   9   19.20    4.70
  -3  12  -9   11.30    4.60
  -3  12  -9    2.40    4.50
   3 -12   9   13.30    4.90
  -3 -12  -9   20.50    5.40
  -3  12 -10   -2.10    4.90
  -3  12 -10    3.30    4.70
   3  12  10    3.50    5.10
   3 -12  10   -5.40    4.60
  -3 -12 -10    9.20    5.20
  -3  13   9    1.50    5.00
   3  13  -9   -3.80    4.70
   3 -13  -9    4.20    5.60
  -3 -13   9    0.50    4.50
   3  13  -8   28.00    5.30
  -3  13   8   31.90    5.50
  -3 -13   8   14.60    4.70
   3 -13  -8   35.20    6.50
   3 -13  -8   20.00    4.30
  -3  13   7    2.30    4.40
   3  13  -7    2.80    4.30
  -3 -13   7    0.30    4.00
   3 -13  -7   -3.50    3.50
  -3  13   6    6.00    4.00
   3  13  -6    4.60    3.70
   3  13  -6    6.40    4.30
  -3 -13   6    1.10    4.10
   3 -13  -6   -1.30    3.70
  -3  13   5    8.50    4.20
   3  13  -5   -0.80    3.60
   3  13  -5   -1.60    3.90
   3 -13  -5   -1.30    3.50
  -3 -13   5    1.90    3.60
   3  13  -4    4.80    3.70
  -3  13   4    7.60    4.30
   3  13  -4    7.40    3.60
  -3 -13   4    4.80    3.70
   3 -13  -4    5.40    3.50
   3  13  -3    7.00    4.10
   3  13  -3   -1.40    3.40
  -3  13   3    5.50    3.80
  -3 -13   3    5.10    3.70
   3 -13  -3    6.30    3.60
  -3  13   2   -1.50    3.50
   3  13  -2    0.30    3.50
  -3  13   2   -0.60    3.60
  -3 -13   2    5.30    3.60
   3 -13  -2    0.40    3.10
   3  13  -1   16.10    3.90
  -3  13   1   10.60    3.90
   3  13  -1   14.50    4.30
  -3  13   1   11.80    3.80
   3 -13  -1   15.70    3.90
  -3 -13   1   14.70    3.80
  -3  13   0    2.70    3.50
  -3  13   0    8.60    3.60
   3  13   0    5.50    3.40
   3  13   0    2.90    3.50
   3 -13   0    7.30    3.50
  -3 -13   0   12.10    3.80
   3  13   1   33.30    4.80
   3  13   1   28.70    4.70
  -3  13  -1   26.90    4.70
  -3  13  -1   26.40    4.50
  -3 -13  -1   24.90    4.20
   3 -13   1   24.00    4.40
   3  13   2    5.90    3.90
   3  13   2   11.80    3.90
  -3  13  -2    4.00    3.60
  -3  13  -2    4.40    4.00
  -3 -13  -2    9.80    3.60
   3 -13   2    8.50    3.60
   3  13   3   24.60    4.60
  -3  13  -3   25.00    4.60
  -3  13  -3   16.30    4.40
   3 -13   3   22.30    4.30
  -3 -13  -3   20.50    4.20
   3  13   4   31.50    5.30
  -3  13  -4   29.10    4.90
  -3  13  -4   16.50    4.50
   3 -13   4   25.20    4.70
  -3 -13  -4   24.50    4.10
  -3  13  -5   14.80    4.30
   3  13   5   14.70    4.70
  -3  13  -5    9.80    4.40
   3 -13   5   13.80    4.40
  -3 -13  -5    8.60    3.80
   3  13   6    5.00    4.40
  -3  13  -6   10.90    4.40
  -3  13  -6    8.00    4.50
  -3 -13  -6    6.20    3.80
   3 -13   6   13.70    4.60
  -3  13  -7    0.20    4.60
   3  13   7    2.90    4.60
  -3  13  -7    6.60    4.30
   3 -13   7   -3.40    4.70
   3  14  -5   16.90    6.70
   3  14  -5   24.70    5.40
  -3  14   5   21.40    5.20
  -3 -14   5   10.30    5.00
   3 -14  -5   13.30    4.80
  -3  14   4   73.89    8.60
   3  14  -4   82.89    7.60
   3  14  -4   87.59    9.00
  -3 -14   4   80.79    7.70
   3 -14  -4   68.39    7.80
   3  14  -3   11.50    4.60
   3  14  -3    9.50    4.40
  -3  14   3    9.70    4.70
  -3  14   3   17.40    4.90
   3 -14  -3   11.30    4.70
  -3 -14   3   11.60    4.70
   3  14  -2  101.79    8.00
  -3  14   2  101.29    8.80
   3  14  -2   95.99    8.30
  -3  14   2   85.69    8.70
   3 -14  -2   96.59    7.70
  -3 -14   2  103.99    8.00
   3  14  -1    8.80    4.30
   3  14  -1   11.50    4.60
  -3  14   1   17.50    4.90
  -3  14   1   19.00    4.90
   3 -14  -1   15.40    4.40
  -3 -14   1   10.20    4.40
   3  14   0   96.29    8.40
   3  14   0   78.09    8.00
  -3  14   0   81.59    8.40
  -3  14   0   91.49    8.30
  -3 -14   0   95.09    8.30
   3 -14   0   79.59    7.60
  -3  14  -1   20.40    4.70
   3  14   1   11.30    4.60
   3  14   1   10.70    4.60
  -3  14  -1   18.90    5.10
  -3 -14  -1   15.30    4.70
   3 -14   1    8.10    4.30
   3  14   2   62.89    6.70
  -3  14  -2   73.19    8.10
  -3  14  -2   71.99    8.00
   3  14   2   73.79    8.50
   3 -14   2   68.59    8.20
  -3 -14  -2   54.79    6.10
  -3  14  -3    8.40    4.70
   3  14   3   -3.00    4.30
  -3  14  -3    5.40    4.40
   3  14   3    4.80    4.70
   3 -14   3    6.80    4.80
  -3 -14  -3    2.60    4.40
  -3  14  -4   25.60    5.20
  -3  14  -4   37.80    5.70
   3  14   4   37.40    6.20
   3 -14   4   20.90    5.40
  -3 -14  -4   28.40    5.00
  -4   0  20  126.29    9.10
   4   0 -20   96.99   10.60
  -4   0  19    1.70    3.50
  -4   0  19    4.70    3.90
   4   0 -19    6.60    4.80
  -4   0  18  578.94   17.20
   4   0 -18  577.34   20.00
  -4   0  18  573.94   19.10
  -4   0  17    3.60    2.50
   4   0 -17    4.80    3.50
  -4   0  17    3.30    3.00
   4   0 -16  319.97   13.20
  -4   0  16  331.37   12.20
  -4   0  16  341.07   11.00
  -4   0  15   -1.70    1.90
   4   0 -15    0.60    2.40
  -4   0  15   -2.30    2.10
   4   0 -15    0.30    1.10
  -4   0  14  553.64   16.70
  -4   0  14  541.85   15.30
   4   0 -14  543.05   17.10
   4   0 -14  542.45   13.80
   4   0 -14  538.75   13.90
  -4   0  13    2.20    1.90
   4   0 -13    1.30    1.20
   4   0 -13    1.70    2.00
  -4   0  13   -1.20    1.30
   4   0 -13   -1.30    1.00
   4   0 -12 1669.13   40.00
  -4   0  12 1631.54   40.90
   4   0 -12 1651.43   40.00
  -4   0  12 1680.43   41.00
   4   0 -12 1663.93   42.70
  -4   0  12 1669.93   42.20
   4   0 -11    1.20    0.90
  -4   0  11   -0.80    1.20
  -4   0  11   -2.00    1.40
   4   0 -11   -0.60    1.50
   4   0 -11   -0.80    0.70
  -4   0  11    0.40    1.10
   4   0 -10 2610.74   64.49
   4   0 -10 2648.33   62.49
  -4   0  10 2638.44   64.09
  -4   0  10 2714.83   63.09
   4   0 -10 2531.25   62.49
  -4   0   9   -0.10    1.10
   4   0  -9   -0.70    0.70
   4   0  -9    0.00    1.20
   4   0  -9   -1.90    0.70
  -4   0   9   -0.70    1.00
  -4   0   9    1.40    1.00
  -4   0   8 4509.65  103.59
   4   0  -8 4434.56  104.69
  -4   0   8 4143.89  104.19
   4   0  -8 4462.45  103.29
   4   0  -8 4317.67  104.29
  -4   0   8 4215.78  103.49
  -4   0   8 4586.74  104.69
  -4   0   7   -1.80    0.80
  -4   0   7   -1.80    1.00
  -4   0   7   -1.30    0.70
   4   0  -7   -1.40    0.60
   4   0  -7   -0.20    0.70
  -4   0   7   -1.40    0.60
   4   0  -7   -2.80    0.90
   4   0  -6 3281.07   78.69
   4   0  -6 3212.88   79.49
   4   0  -6 3429.86   79.39
  -4   0   6 3475.35   79.49
   4   0  -6 3398.76   78.69
  -4   0   6 3176.58   79.19
  -4   0   6 3333.27   78.59
  -4   0   5   -1.60    0.70
   4   0  -5   -0.50    0.70
   4   0  -5   -1.80    0.50
   4   0  -5   -1.70    0.50
  -4   0   5   -0.20    0.50
  -4   0   5   -2.40    0.60
   4   0  -5   -2.90    0.60
   4   0  -4 4228.78   99.89
   4   0  -3   -3.10    0.40
  -4   0   3   -4.20    0.30
   4   0  -3   -4.10    0.50
   4   0  -3   -4.00    0.50
  -4   0   3   -3.90    0.50
[truncated: 1,271,805 more chars]
