# Supplementary material for: Practical synthetic strategies towards lipophilic 6-iodotetrahydroquinolines and -dihydroquinolines
Source: Beilstein J Org Chem. 2016 Aug 16;12:1851–62. doi: 10.3762/bjoc.12.174 (PMC5082455; doi:10.3762/bjoc.12.174)
Supplement: File 2 — Crystallographic Information Files of compounds 13, 14, 15b, 19, 29, and 30. [file Beilstein_J_Org_Chem-12-1851-s002.zip › 15b_ 1433618.cif]

data_mo_dcoisopropylface
_audit_creation_date              2015-11-16
_audit_creation_method
;
Olex2 1.2
(compiled 2015.09.30 svn.r3233 for OlexSys, GUI svn.r5103)
;
_shelxl_version_number            2014-3
_publ_contact_author_address      Chemistry Department, Durham University, South Road, Durham, DH1 3LE, UK
_publ_contact_author_email        andy.whiting@durham.ac.uk
_publ_contact_author_name         Andrew Whiting
_publ_contact_author_phone        ?
_publ_requested_journal           Beilstein J. Org. Chem.
_publ_section_references
;
Dolomanov, O.V., Bourhis, L.J., Gildea, R.J, Howard, J.A.K. & Puschmann, H.
 (2009), J. Appl. Cryst. 42, 339-341.

Sheldrick, G.M. (2015). Acta Cryst. A71, 3-8.

Sheldrick, G.M. (2015). Acta Cryst. C71, 3-8.
;
_chemical_name_common             ?
_chemical_name_systematic
6-Iodo-4,4,8-trimethyl-2-(propan-2-yloxy)-3,4-dihydroquinoline
_chemical_formula_moiety          'C15 H20 I N O'
_chemical_formula_sum             'C15 H20 I N O'
_chemical_formula_weight          357.22
_chemical_melting_point           ?
loop_
  _atom_type_symbol
  _atom_type_description
  _atom_type_scat_dispersion_real
  _atom_type_scat_dispersion_imag
  _atom_type_scat_source
 'C' 'C' 0.0033 0.0016 'International Tables Vol C Tables 4.2.6.8 and 6.1.1.4'
 'H' 'H' 0.0000 0.0000 'International Tables Vol C Tables 4.2.6.8 and 6.1.1.4'
 'I' 'I' -0.4742 1.8119 'International Tables Vol C Tables 4.2.6.8 and 6.1.1.4'
 'N' 'N' 0.0061 0.0033 'International Tables Vol C Tables 4.2.6.8 and 6.1.1.4'
 'O' 'O' 0.0106 0.0060 'International Tables Vol C Tables 4.2.6.8 and 6.1.1.4'

_shelx_space_group_comment
;
The symmetry employed for this shelxl refinement is uniquely defined
by the following loop, which should always be used as a source of
symmetry information in preference to the above space-group names.
They are only intended as comments.
;
_space_group_crystal_system       'monoclinic'
_space_group_IT_number            14
_space_group_name_H-M_alt         'P 1 21/n 1'
_space_group_name_Hall            '-P 2yn'
loop_
  _space_group_symop_operation_xyz
 'x, y, z'
 '-x+1/2, y+1/2, -z+1/2'
 '-x, -y, -z'
 'x-1/2, -y-1/2, z-1/2'

_cell_length_a                    8.3580(8)
_cell_length_b                    15.7426(15)
_cell_length_c                    11.7029(11)
_cell_angle_alpha                 90
_cell_angle_beta                  93.446(2)
_cell_angle_gamma                 90
_cell_volume                      1537.0(3)
_cell_formula_units_Z             4
_cell_measurement_reflns_used     9912
_cell_measurement_temperature     120
_cell_measurement_theta_max       32.538
_cell_measurement_theta_min       2.587
_shelx_estimated_absorpt_T_max    ?
_shelx_estimated_absorpt_T_min    ?
_exptl_absorpt_coefficient_mu     2.073
_exptl_absorpt_correction_T_max   0.8963
_exptl_absorpt_correction_T_min   0.6299
_exptl_absorpt_correction_type    numerical
_exptl_absorpt_process_details
;
SADABS-2014/4 (Bruker,2014) was used for absorption correction.
wR2(int) was 0.1301 before and 0.1106 after correction.
The Ratio of minimum to maximum transmission is 0.7028.
The \l/2 correction factor is Not present.
;
_exptl_crystal_colour             'clear light colourless'
_exptl_crystal_colour_lustre      clear
_exptl_crystal_colour_modifier    light
_exptl_crystal_colour_primary     colourless
_exptl_crystal_density_diffrn     1.544
_exptl_crystal_density_meas       ?
_exptl_crystal_density_method     ?
_exptl_crystal_description        plate
_exptl_crystal_F_000              712
_exptl_crystal_preparation        ?
_exptl_crystal_recrystallization_method
'The material was recrystallised from EtOAc by slow evaporation'
_exptl_crystal_size_max           0.183
_exptl_crystal_size_mid           0.158
_exptl_crystal_size_min           0.081
_exptl_special_details
;
 ?
;
_exptl_transmission_factor_max    ?
_exptl_transmission_factor_min    ?
_diffrn_reflns_av_R_equivalents   0.0719
_diffrn_reflns_av_unetI/netI      0.0544
_diffrn_reflns_Laue_measured_fraction_full 0.999
_diffrn_reflns_Laue_measured_fraction_max 0.983
_diffrn_reflns_limit_h_max        12
_diffrn_reflns_limit_h_min        -12
_diffrn_reflns_limit_k_max        23
_diffrn_reflns_limit_k_min        -23
_diffrn_reflns_limit_l_max        17
_diffrn_reflns_limit_l_min        -17
_diffrn_reflns_number             24942
_diffrn_reflns_point_group_measured_fraction_full 0.999
_diffrn_reflns_point_group_measured_fraction_max 0.983
_diffrn_reflns_theta_full         26.000
_diffrn_reflns_theta_max          32.640
_diffrn_reflns_theta_min          2.588
_diffrn_ambient_temperature       120
_diffrn_detector                  'Bruker APEX2 area detector'
_diffrn_detector_area_resol_mean  7.9
_diffrn_detector_type             'CCD area detector'
_diffrn_measured_fraction_theta_full 0.999
_diffrn_measured_fraction_theta_max 0.983
_diffrn_measurement_device        'three-circle diffractometer'
_diffrn_measurement_device_type   'Bruker SMART APEX2 area detector'
_diffrn_measurement_method        '\w and \f scans'
_diffrn_radiation_monochromator   'mirror optics'
_diffrn_radiation_probe           x-ray
_diffrn_radiation_type            MoK\a
_diffrn_radiation_wavelength      0.71073
_diffrn_source                    'microfocus sealed X-ray tube'
_diffrn_source_type               'Incoatec I\ms'
_diffrn_special_details           ?
_diffrn_standards_number          0
_reflns_Friedel_coverage          0.000
_reflns_Friedel_fraction_full     .
_reflns_Friedel_fraction_max      .
_reflns_number_gt                 4789
_reflns_number_total              5530
_reflns_special_details
;
 Reflections were merged by SHELXL according to the crystal
 class for the calculation of statistics and refinement.
 
 _reflns_Friedel_fraction is defined as the number of unique
 Friedel pairs measured divided by the number that would be
 possible theoretically, ignoring centric projections and
 systematic absences.
;
_reflns_threshold_expression      'I > 2\s(I)'
_computing_cell_refinement        'SAINT v8.34A (Bruker, 2013)'
_computing_data_collection        ?
_computing_data_reduction         'SAINT v8.34A (Bruker, 2013)'
_computing_molecular_graphics     'Olex2 (Dolomanov et al., 2009)'
_computing_publication_material   'Olex2 (Dolomanov et al., 2009)'
_computing_structure_refinement   'ShelXL (Sheldrick, 2015)'
_computing_structure_solution     'ShelXT (Sheldrick, 2015)'
_refine_diff_density_max          2.730
_refine_diff_density_min          -0.846
_refine_diff_density_rms          0.259
_refine_ls_extinction_coef        .
_refine_ls_extinction_method      none
_refine_ls_goodness_of_fit_ref    1.050
_refine_ls_hydrogen_treatment     constr
_refine_ls_matrix_type            full
_refine_ls_number_parameters      168
_refine_ls_number_reflns          5530
_refine_ls_number_restraints      0
_refine_ls_R_factor_all           0.0664
_refine_ls_R_factor_gt            0.0591
_refine_ls_restrained_S_all       1.050
_refine_ls_shift/su_max           0.001
_refine_ls_shift/su_mean          0.000
_refine_ls_structure_factor_coef  Fsqd
_refine_ls_weighting_details
'w=1/[\s^2^(Fo^2^)+(0.1076P)^2^] where P=(Fo^2^+2Fc^2^)/3'
_refine_ls_weighting_scheme       calc
_refine_ls_wR_factor_gt           0.1448
_refine_ls_wR_factor_ref          0.1508
_refine_special_details
;
 ?
;
_olex2_refinement_description
;
1. Fixed Uiso
 At 1.2 times of:
  All C(H) groups, All C(H,H) groups
 At 1.5 times of:
  All C(H,H,H) groups
2.a Ternary CH refined with riding coordinates:
 C15(H15)
2.b Secondary CH2 refined with riding coordinates:
 C10(H10A,H10B)
2.c Aromatic/amide H refined with riding coordinates:
 C3(H3), C5(H5)
2.d Idealised Me refined as rotating group:
 C7(H7A,H7B,H7C), C12(H12A,H12B,H12C), C13(H13A,H13B,H13C), C16(H16A,H16B,
 H16C), C17(H17A,H17B,H17C)
;
_atom_sites_solution_hydrogens    geom
_atom_sites_solution_primary      ?
_atom_sites_solution_secondary    ?
loop_
  _atom_site_label
  _atom_site_type_symbol
  _atom_site_fract_x
  _atom_site_fract_y
  _atom_site_fract_z
  _atom_site_U_iso_or_equiv
  _atom_site_adp_type
  _atom_site_occupancy
  _atom_site_site_symmetry_order
  _atom_site_calc_flag
  _atom_site_refinement_flags_posn
  _atom_site_refinement_flags_adp
  _atom_site_refinement_flags_occupancy
  _atom_site_disorder_assembly
  _atom_site_disorder_group
 I18 I 0.75620(2) 0.19124(2) 0.38963(2) 0.02107(9) Uani 1 1 d . . . . .
 O14 O 0.2110(2) 0.54341(12) 0.72674(16) 0.0200(4) Uani 1 1 d . . . . .
 N8 N 0.4026(2) 0.43968(13) 0.71171(17) 0.0159(4) Uani 1 1 d . . . . .
 C1 C 0.4793(3) 0.38495(14) 0.63663(19) 0.0139(4) Uani 1 1 d . . . . .
 C2 C 0.4137(3) 0.36500(14) 0.5258(2) 0.0137(4) Uani 1 1 d . . . . .
 C3 C 0.4944(3) 0.31020(13) 0.4567(2) 0.0156(5) Uani 1 1 d . . . . .
 H3 H 0.4504 0.2966 0.3822 0.019 Uiso 1 1 calc R . . . .
 C4 C 0.6395(3) 0.27518(15) 0.4966(2) 0.0163(4) Uani 1 1 d . . . . .
 C5 C 0.7053(3) 0.29374(17) 0.6047(2) 0.0170(4) Uani 1 1 d . . . . .
 H5 H 0.8044 0.2688 0.6307 0.020 Uiso 1 1 calc R . . . .
 C6 C 0.6270(3) 0.34901(15) 0.6757(2) 0.0143(4) Uani 1 1 d . . . . .
 C7 C 0.7002(3) 0.36988(18) 0.7937(2) 0.0207(5) Uani 1 1 d . . . . .
 H7A H 0.6940 0.4313 0.8067 0.031 Uiso 1 1 calc GR . . . .
 H7B H 0.8127 0.3520 0.7993 0.031 Uiso 1 1 calc GR . . . .
 H7C H 0.6415 0.3399 0.8515 0.031 Uiso 1 1 calc GR . . . .
 C9 C 0.2925(3) 0.48812(16) 0.6663(2) 0.0159(4) Uani 1 1 d . . . . .
 C10 C 0.2406(3) 0.49013(15) 0.5422(2) 0.0156(4) Uani 1 1 d . . . . .
 H10A H 0.3099 0.5299 0.5021 0.019 Uiso 1 1 calc R . . . .
 H10B H 0.1291 0.5113 0.5329 0.019 Uiso 1 1 calc R . . . .
 C11 C 0.2501(3) 0.40173(15) 0.4882(2) 0.0146(4) Uani 1 1 d . . . . .
 C12 C 0.1207(3) 0.34347(16) 0.5342(2) 0.0206(5) Uani 1 1 d . . . . .
 H12A H 0.1311 0.2863 0.5023 0.031 Uiso 1 1 calc GR . . . .
 H12B H 0.0143 0.3662 0.5116 0.031 Uiso 1 1 calc GR . . . .
 H12C H 0.1343 0.3408 0.6178 0.031 Uiso 1 1 calc GR . . . .
 C13 C 0.2230(3) 0.41002(19) 0.3590(2) 0.0224(5) Uani 1 1 d . . . . .
 H13A H 0.3102 0.4433 0.3289 0.034 Uiso 1 1 calc GR . . . .
 H13B H 0.1206 0.4388 0.3407 0.034 Uiso 1 1 calc GR . . . .
 H13C H 0.2206 0.3534 0.3242 0.034 Uiso 1 1 calc GR . . . .
 C15 C 0.2576(3) 0.55679(19) 0.8473(2) 0.0223(5) Uani 1 1 d . . . . .
 H15 H 0.2801 0.5008 0.8854 0.027 Uiso 1 1 calc R . . . .
 C16 C 0.1143(4) 0.5976(3) 0.8968(3) 0.0393(8) Uani 1 1 d . . . . .
 H16A H 0.1001 0.6551 0.8658 0.059 Uiso 1 1 calc GR . . . .
 H16B H 0.1313 0.6005 0.9803 0.059 Uiso 1 1 calc GR . . . .
 H16C H 0.0184 0.5638 0.8766 0.059 Uiso 1 1 calc GR . . . .
 C17 C 0.4050(4) 0.6119(2) 0.8586(3) 0.0316(7) Uani 1 1 d . . . . .
 H17A H 0.4930 0.5838 0.8218 0.047 Uiso 1 1 calc GR . . . .
 H17B H 0.4356 0.6209 0.9399 0.047 Uiso 1 1 calc GR . . . .
 H17C H 0.3824 0.6668 0.8216 0.047 Uiso 1 1 calc GR . . . .

loop_
  _atom_site_aniso_label
  _atom_site_aniso_U_11
  _atom_site_aniso_U_22
  _atom_site_aniso_U_33
  _atom_site_aniso_U_23
  _atom_site_aniso_U_13
  _atom_site_aniso_U_12
 I18 0.02000(13) 0.02158(13) 0.02175(13) -0.00509(5) 0.00223(8) 0.00577(5)
 O14 0.0207(9) 0.0209(9) 0.0182(8) -0.0063(7) -0.0009(7) 0.0070(7)
 N8 0.0174(9) 0.0164(9) 0.0141(9) -0.0014(7) 0.0023(7) 0.0015(7)
 C1 0.0128(10) 0.0144(10) 0.0145(10) -0.0003(8) 0.0011(8) 0.0001(8)
 C2 0.0134(10) 0.0121(9) 0.0156(10) -0.0002(8) 0.0016(8) 0.0002(8)
 C3 0.0141(11) 0.0166(11) 0.0158(11) -0.0009(7) 0.0003(9) -0.0007(7)
 C4 0.0172(11) 0.0145(10) 0.0177(11) -0.0034(8) 0.0050(8) 0.0037(8)
 C5 0.0145(10) 0.0194(10) 0.0174(11) 0.0030(9) 0.0014(8) 0.0050(9)
 C6 0.0146(10) 0.0140(10) 0.0145(10) 0.0014(8) 0.0010(8) 0.0007(8)
 C7 0.0201(12) 0.0244(12) 0.0171(11) -0.0001(9) -0.0029(9) 0.0029(9)
 C9 0.0156(10) 0.0158(10) 0.0167(10) -0.0031(8) 0.0029(8) -0.0004(8)
 C10 0.0155(10) 0.0151(10) 0.0160(10) 0.0011(8) -0.0014(8) 0.0011(8)
 C11 0.0139(10) 0.0146(10) 0.0151(10) -0.0006(8) -0.0012(8) 0.0013(8)
 C12 0.0164(11) 0.0184(12) 0.0269(13) 0.0023(9) -0.0002(9) -0.0029(9)
 C13 0.0204(12) 0.0280(13) 0.0183(11) -0.0014(10) -0.0026(10) 0.0048(10)
 C15 0.0252(13) 0.0261(13) 0.0154(11) -0.0045(9) 0.0000(9) 0.0049(10)
 C16 0.0300(16) 0.059(2) 0.0287(16) -0.0182(15) 0.0034(13) 0.0137(15)
 C17 0.0347(16) 0.0302(15) 0.0299(15) -0.0115(12) 0.0011(12) -0.0047(12)

_geom_special_details
;
 All esds (except the esd in the dihedral angle between two l.s. planes)
 are estimated using the full covariance matrix.  The cell esds are taken
 into account individually in the estimation of esds in distances, angles
 and torsion angles; correlations between esds in cell parameters are only
 used when they are defined by crystal symmetry.  An approximate (isotropic)
 treatment of cell esds is used for estimating esds involving l.s. planes.
;
loop_
  _geom_bond_atom_site_label_1
  _geom_bond_atom_site_label_2
  _geom_bond_distance
  _geom_bond_site_symmetry_2
  _geom_bond_publ_flag
 I18 C4 2.100(2) . ?
 O14 C9 1.334(3) . ?
 O14 C15 1.456(3) . ?
 N8 C1 1.412(3) . ?
 N8 C9 1.285(3) . ?
 C1 C2 1.413(3) . ?
 C1 C6 1.409(3) . ?
 C2 C3 1.385(3) . ?
 C2 C11 1.525(3) . ?
 C3 H3 0.9500 . ?
 C3 C4 1.387(4) . ?
 C4 C5 1.380(4) . ?
 C5 H5 0.9500 . ?
 C5 C6 1.394(3) . ?
 C6 C7 1.512(3) . ?
 C7 H7A 0.9800 . ?
 C7 H7B 0.9800 . ?
 C7 H7C 0.9800 . ?
 C9 C10 1.491(4) . ?
 C10 H10A 0.9900 . ?
 C10 H10B 0.9900 . ?
 C10 C11 1.533(3) . ?
 C11 C12 1.540(3) . ?
 C11 C13 1.520(3) . ?
 C12 H12A 0.9800 . ?
 C12 H12B 0.9800 . ?
 C12 H12C 0.9800 . ?
 C13 H13A 0.9800 . ?
 C13 H13B 0.9800 . ?
 C13 H13C 0.9800 . ?
 C15 H15 1.0000 . ?
 C15 C16 1.505(4) . ?
 C15 C17 1.506(4) . ?
 C16 H16A 0.9800 . ?
 C16 H16B 0.9800 . ?
 C16 H16C 0.9800 . ?
 C17 H17A 0.9800 . ?
 C17 H17B 0.9800 . ?
 C17 H17C 0.9800 . ?

loop_
  _geom_angle_atom_site_label_1
  _geom_angle_atom_site_label_2
  _geom_angle_atom_site_label_3
  _geom_angle
  _geom_angle_site_symmetry_1
  _geom_angle_site_symmetry_3
  _geom_angle_publ_flag
 C9 O14 C15 119.5(2) . . ?
 C9 N8 C1 116.5(2) . . ?
 N8 C1 C2 122.8(2) . . ?
 C6 C1 N8 117.7(2) . . ?
 C6 C1 C2 119.5(2) . . ?
 C1 C2 C11 118.2(2) . . ?
 C3 C2 C1 119.9(2) . . ?
 C3 C2 C11 121.8(2) . . ?
 C2 C3 H3 120.1 . . ?
 C2 C3 C4 119.9(2) . . ?
 C4 C3 H3 120.1 . . ?
 C3 C4 I18 118.55(18) . . ?
 C5 C4 I18 120.36(18) . . ?
 C5 C4 C3 121.1(2) . . ?
 C4 C5 H5 119.9 . . ?
 C4 C5 C6 120.2(2) . . ?
 C6 C5 H5 119.9 . . ?
 C1 C6 C7 120.5(2) . . ?
 C5 C6 C1 119.4(2) . . ?
 C5 C6 C7 120.1(2) . . ?
 C6 C7 H7A 109.5 . . ?
 C6 C7 H7B 109.5 . . ?
 C6 C7 H7C 109.5 . . ?
 H7A C7 H7B 109.5 . . ?
 H7A C7 H7C 109.5 . . ?
 H7B C7 H7C 109.5 . . ?
 O14 C9 C10 112.0(2) . . ?
 N8 C9 O14 123.0(2) . . ?
 N8 C9 C10 125.0(2) . . ?
 C9 C10 H10A 109.4 . . ?
 C9 C10 H10B 109.4 . . ?
 C9 C10 C11 111.31(19) . . ?
 H10A C10 H10B 108.0 . . ?
 C11 C10 H10A 109.4 . . ?
 C11 C10 H10B 109.4 . . ?
 C2 C11 C10 107.03(19) . . ?
 C2 C11 C12 108.03(19) . . ?
 C10 C11 C12 110.0(2) . . ?
 C13 C11 C2 113.4(2) . . ?
 C13 C11 C10 108.9(2) . . ?
 C13 C11 C12 109.4(2) . . ?
 C11 C12 H12A 109.5 . . ?
 C11 C12 H12B 109.5 . . ?
 C11 C12 H12C 109.5 . . ?
 H12A C12 H12B 109.5 . . ?
 H12A C12 H12C 109.5 . . ?
 H12B C12 H12C 109.5 . . ?
 C11 C13 H13A 109.5 . . ?
 C11 C13 H13B 109.5 . . ?
 C11 C13 H13C 109.5 . . ?
 H13A C13 H13B 109.5 . . ?
 H13A C13 H13C 109.5 . . ?
 H13B C13 H13C 109.5 . . ?
 O14 C15 H15 109.7 . . ?
 O14 C15 C16 105.2(2) . . ?
 O14 C15 C17 109.8(2) . . ?
 C16 C15 H15 109.7 . . ?
 C16 C15 C17 112.7(3) . . ?
 C17 C15 H15 109.7 . . ?
 C15 C16 H16A 109.5 . . ?
 C15 C16 H16B 109.5 . . ?
 C15 C16 H16C 109.5 . . ?
 H16A C16 H16B 109.5 . . ?
 H16A C16 H16C 109.5 . . ?
 H16B C16 H16C 109.5 . . ?
 C15 C17 H17A 109.5 . . ?
 C15 C17 H17B 109.5 . . ?
 C15 C17 H17C 109.5 . . ?
 H17A C17 H17B 109.5 . . ?
 H17A C17 H17C 109.5 . . ?
 H17B C17 H17C 109.5 . . ?

loop_
  _geom_torsion_atom_site_label_1
  _geom_torsion_atom_site_label_2
  _geom_torsion_atom_site_label_3
  _geom_torsion_atom_site_label_4
  _geom_torsion
  _geom_torsion_site_symmetry_1
  _geom_torsion_site_symmetry_2
  _geom_torsion_site_symmetry_3
  _geom_torsion_site_symmetry_4
  _geom_torsion_publ_flag
 I18 C4 C5 C6 -179.55(19) . . . . ?
 O14 C9 C10 C11 -146.0(2) . . . . ?
 N8 C1 C2 C3 -179.4(2) . . . . ?
 N8 C1 C2 C11 -2.4(3) . . . . ?
 N8 C1 C6 C5 179.1(2) . . . . ?
 N8 C1 C6 C7 -0.8(3) . . . . ?
 N8 C9 C10 C11 34.2(3) . . . . ?
 C1 N8 C9 O14 -179.5(2) . . . . ?
 C1 N8 C9 C10 0.3(3) . . . . ?
 C1 C2 C3 C4 -0.1(4) . . . . ?
 C1 C2 C11 C10 34.8(3) . . . . ?
 C1 C2 C11 C12 -83.6(3) . . . . ?
 C1 C2 C11 C13 154.9(2) . . . . ?
 C2 C1 C6 C5 -0.5(3) . . . . ?
 C2 C1 C6 C7 179.6(2) . . . . ?
 C2 C3 C4 I18 179.27(18) . . . . ?
 C2 C3 C4 C5 0.2(4) . . . . ?
 C3 C2 C11 C10 -148.3(2) . . . . ?
 C3 C2 C11 C12 93.3(3) . . . . ?
 C3 C2 C11 C13 -28.2(3) . . . . ?
 C3 C4 C5 C6 -0.5(4) . . . . ?
 C4 C5 C6 C1 0.7(4) . . . . ?
 C4 C5 C6 C7 -179.4(2) . . . . ?
 C6 C1 C2 C3 0.2(3) . . . . ?
 C6 C1 C2 C11 177.2(2) . . . . ?
 C9 O14 C15 C16 -161.6(3) . . . . ?
 C9 O14 C15 C17 76.9(3) . . . . ?
 C9 N8 C1 C2 -17.6(3) . . . . ?
 C9 N8 C1 C6 162.8(2) . . . . ?
 C9 C10 C11 C2 -47.7(3) . . . . ?
 C9 C10 C11 C12 69.4(2) . . . . ?
 C9 C10 C11 C13 -170.7(2) . . . . ?
 C11 C2 C3 C4 -177.0(2) . . . . ?
 C15 O14 C9 N8 6.5(4) . . . . ?
 C15 O14 C9 C10 -173.3(2) . . . . ?

_shelx_res_file
;
TITL mo_dcoisopropylface_a.res in P2(1)/n
REM Old TITL mo_DCOisopropylFace in P21/n #14
REM SHELXT solution in P2(1)/n
REM R1 0.083, Rweak 0.005, Alpha 0.026, Orientation as input
REM Formula found by SHELXT: C15 N O I
CELL 0.71073 8.358 15.7426 11.7029 90 93.446 90
ZERR 4 0.0008 0.0015 0.0011 0 0.002 0
LATT 1
SYMM 0.5-X,0.5+Y,0.5-Z
SFAC C H I N O
UNIT 60 80 4 4 4

L.S. 10
PLAN  20
TEMP -153.15
BOND $H
LIST 6
MORE -1
CONF
fmap 2
acta 52
REM <olex2.extras>
REM <HklSrc "%./mo_DCOisopropylFace.hkl">
REM </olex2.extras>

WGHT    0.107600
FVAR       0.29668
I18   3    0.756204    0.191244    0.389626    11.00000    0.02000    0.02158 =
         0.02175   -0.00509    0.00223    0.00577
O14   5    0.211033    0.543407    0.726737    11.00000    0.02066    0.02091 =
         0.01825   -0.00627   -0.00092    0.00705
N8    4    0.402648    0.439678    0.711712    11.00000    0.01735    0.01636 =
         0.01409   -0.00141    0.00226    0.00155
C1    1    0.479334    0.384951    0.636627    11.00000    0.01283    0.01437 =
         0.01453   -0.00026    0.00112    0.00014
C2    1    0.413690    0.365005    0.525789    11.00000    0.01342    0.01213 =
         0.01556   -0.00019    0.00156    0.00022
C3    1    0.494376    0.310198    0.456712    11.00000    0.01414    0.01662 =
         0.01583   -0.00092    0.00032   -0.00069
AFIX  43
H3    2    0.450437    0.296621    0.382198    11.00000   -1.20000
AFIX   0
C4    1    0.639468    0.275175    0.496551    11.00000    0.01720    0.01452 =
         0.01773   -0.00343    0.00499    0.00368
C5    1    0.705315    0.293737    0.604671    11.00000    0.01446    0.01938 =
         0.01735    0.00300    0.00137    0.00501
AFIX  43
H5    2    0.804351    0.268758    0.630740    11.00000   -1.20000
AFIX   0
C6    1    0.626967    0.349006    0.675707    11.00000    0.01461    0.01396 =
         0.01447    0.00135    0.00102    0.00069
C7    1    0.700243    0.369882    0.793671    11.00000    0.02014    0.02439 =
         0.01708   -0.00009   -0.00285    0.00285
AFIX 137
H7A   2    0.693960    0.431258    0.806663    11.00000   -1.50000
H7B   2    0.812736    0.351972    0.799324    11.00000   -1.50000
H7C   2    0.641516    0.339945    0.851464    11.00000   -1.50000
AFIX   0
C9    1    0.292510    0.488116    0.666330    11.00000    0.01556    0.01577 =
         0.01666   -0.00307    0.00293   -0.00038
C10   1    0.240626    0.490133    0.542198    11.00000    0.01547    0.01513 =
         0.01603    0.00109   -0.00138    0.00110
AFIX  23
H10A  2    0.309906    0.529871    0.502052    11.00000   -1.20000
H10B  2    0.129057    0.511283    0.532850    11.00000   -1.20000
AFIX   0
C11   1    0.250132    0.401731    0.488153    11.00000    0.01393    0.01456 =
         0.01509   -0.00061   -0.00125    0.00126
C12   1    0.120722    0.343470    0.534153    11.00000    0.01640    0.01835 =
         0.02692    0.00234   -0.00019   -0.00294
AFIX 137
H12A  2    0.131139    0.286316    0.502253    11.00000   -1.50000
H12B  2    0.014327    0.366235    0.511650    11.00000   -1.50000
H12C  2    0.134336    0.340778    0.617835    11.00000   -1.50000
AFIX   0
C13   1    0.222981    0.410020    0.359036    11.00000    0.02040    0.02800 =
         0.01830   -0.00142   -0.00262    0.00483
AFIX 137
H13A  2    0.310209    0.443265    0.328936    11.00000   -1.50000
H13B  2    0.120625    0.438753    0.340713    11.00000   -1.50000
H13C  2    0.220604    0.353384    0.324216    11.00000   -1.50000
AFIX   0
C15   1    0.257600    0.556791    0.847287    11.00000    0.02516    0.02612 =
         0.01543   -0.00450    0.00001    0.00485
AFIX  13
H15   2    0.280095    0.500842    0.885402    11.00000   -1.20000
AFIX   0
C16   1    0.114338    0.597605    0.896793    11.00000    0.02999    0.05933 =
         0.02872   -0.01817    0.00344    0.01366
AFIX 137
H16A  2    0.100101    0.655109    0.865756    11.00000   -1.50000
H16B  2    0.131261    0.600521    0.980293    11.00000   -1.50000
H16C  2    0.018379    0.563757    0.876562    11.00000   -1.50000
AFIX   0
C17   1    0.405038    0.611876    0.858640    11.00000    0.03469    0.03017 =
         0.02988   -0.01146    0.00114   -0.00471
AFIX 137
H17A  2    0.493040    0.583810    0.821782    11.00000   -1.50000
H17B  2    0.435634    0.620887    0.939889    11.00000   -1.50000
H17C  2    0.382371    0.666771    0.821635    11.00000   -1.50000
AFIX   0
HKLF 4

REM  mo_dcoisopropylface_a.res in P2(1)/n
REM R1 =  0.0591 for    4789 Fo > 4sig(Fo)  and  0.0664 for all    5530 data
REM    168 parameters refined using      0 restraints

END

WGHT      0.1076      0.0000

REM Highest difference peak  2.730,  deepest hole -0.846,  1-sigma level  0.259
Q1    1   0.8178  0.1912  0.3627  11.00000  0.05    2.73
Q2    1   0.7991  0.1626  0.4154  11.00000  0.05    2.70
Q3    1   0.6990  0.1921  0.4192  11.00000  0.05    2.61
Q4    1   0.7913  0.2198  0.4163  11.00000  0.05    2.47
Q5    1   0.7224  0.1656  0.3588  11.00000  0.05    2.29
Q6    1   0.7167  0.2164  0.3563  11.00000  0.05    2.23
Q7    1   0.6776  0.2636  0.4588  11.00000  0.05    1.14
Q8    1   0.6326  0.1932  0.4801  11.00000  0.05    1.13
Q9    1   0.3490  0.4597  0.6767  11.00000  0.05    1.01
Q10   1   0.2472  0.5725  0.6140  11.00000  0.05    0.95
Q11   1   0.7258  0.2880  0.3989  11.00000  0.05    0.95
Q12   1   0.5401  0.3643  0.6794  11.00000  0.05    0.94
Q13   1   0.2661  0.5342  0.6998  11.00000  0.05    0.93
Q14   1   0.8769  0.1932  0.3004  11.00000  0.05    0.92
Q15   1   0.6496  0.1957  0.2811  11.00000  0.05    0.88
Q16   1   0.4689  0.3313  0.5025  11.00000  0.05    0.87
Q17   1   0.7725  0.2874  0.3678  11.00000  0.05    0.87
Q18   1   0.2535  0.5050  0.7040  11.00000  0.05    0.86
Q19   1   0.4311  0.4226  0.6658  11.00000  0.05    0.86
Q20   1   0.4353  0.3996  0.5786  11.00000  0.05    0.83
;
_shelx_res_checksum               76332
_shelx_hkl_file
;
   1   0   0    0.10    0.20
   1   0   0    0.10    0.10
  -1   0   0    0.50    0.20
  -1   0   0    0.20    0.10
   2   0   0 9999.00  890.51
   2   0   0 9399.96  889.91
   2   0   0 8723.23  890.11
  -2   0   0 9454.75  890.11
  -2   0   0 8763.92  890.21
  -2   0   0 8953.90  889.91
   3   0   0    0.10    0.40
  -3   0   0    0.60    0.60
   3   0   0    0.50    0.30
  -3   0   0    0.00    0.30
   3   0   0    1.00    0.60
  -3   0   0    0.10    0.40
   4   0   0 2435.96  214.78
  -4   0   0 1962.40  214.78
  -4   0   0 1989.90  214.68
  -4   0   0 2498.85  214.68
  -5   0   0    0.80    0.90
   5   0   0    0.70    1.20
   5   0   0    0.40    0.70
  -5   0   0    2.20    1.10
   5   0   0    1.50    0.70
   6   0   0 1927.81  179.08
  -6   0   0 1840.52  179.28
   6   0   0 1788.82  179.18
  -7   0   0    1.60    1.50
   7   0   0    0.00    1.00
   7   0   0    2.20    1.30
   8   0   0 1062.59   91.69
  -8   0   0  811.22   91.99
   8   0   0 1069.09   91.99
   8   0   0  841.92   91.69
   9   0   0    3.10    1.90
   9   0   0   -0.70    1.40
  -9   0   0    2.50    2.00
  10   0   0   94.59    9.80
 -10   0   0   77.49    9.60
  11   0   0    1.20    2.90
 -11   0   0    0.50    2.80
  12   0   0   61.59    9.20
  -1  -1   0  350.46   36.40
  -1  -1   0  412.16   36.40
   1  -1   0  345.07   36.40
  -1  -1   0  336.27   36.40
   1  -1   0  389.96   36.40
   1  -1   0  323.47   36.40
  -1   1   0  424.06   36.40
   1   1   0  384.66   36.40
  -1   1   0  357.46   36.40
   1   1   0  407.76   36.40
  -1   1   0  398.06   36.40
   1   1   0  388.86   36.40
   2  -1   0  114.39   11.60
   2  -1   0  135.19   11.70
   2  -1   0  118.99   11.70
  -2  -1   0  116.49   11.60
  -2  -1   0  125.19   11.70
   2   1   0  112.29   11.60
   2   1   0  124.19   11.60
  -2   1   0  131.29   11.70
   2   1   0  105.99   11.70
   2   1   0  119.09   11.60
  -2   1   0  117.09   11.70
  -2   1   0  112.29   11.60
   3  -1   0    2.80    0.50
  -3  -1   0    2.70    0.70
   3  -1   0    1.50    0.50
   3  -1   0    1.80    0.70
  -3  -1   0    1.50    0.50
   3   1   0    2.40    0.50
   3   1   0    1.90    0.70
  -3   1   0    2.40    0.50
   3   1   0    1.70    0.50
   3   1   0    1.70    0.50
  -3   1   0    2.60    0.70
  -3   1   0    1.20    0.50
  -4  -1   0   21.30    2.50
   4  -1   0   21.70    2.20
   4  -1   0   19.00    2.50
  -4  -1   0   14.80    2.20
  -4   1   0   20.60    2.20
   4   1   0   13.40    2.40
  -4   1   0   22.40    2.50
   4   1   0   21.00    2.20
   4   1   0   20.10    2.10
   4   1   0   15.70    2.20
  -5  -1   0    2.10    1.10
   5  -1   0    0.70    0.70
   5  -1   0    0.00    1.10
   5  -1   0    0.20    0.80
  -5  -1   0    0.10    0.80
  -5   1   0    0.60    0.90
   5   1   0    0.90    0.60
  -5   1   0    0.10    0.60
   5   1   0    1.40    0.70
   5   1   0    2.90    1.30
  -5   1   0    0.40    0.90
   5   1   0    1.00    0.70
  -6  -1   0   85.99   10.20
   6  -1   0   97.29   10.20
   6   1   0  106.59   10.00
  -6   1   0  113.09   10.10
  -6   1   0  106.99   10.40
   6   1   0  106.39   10.20
   6   1   0   85.49   10.00
   7  -1   0    7.70    1.70
   7  -1   0    8.60    1.70
  -7  -1   0    6.70    1.90
   7   1   0    9.80    1.80
  -7   1   0    8.30    2.00
   7   1   0    5.10    1.60
  -8  -1   0   26.50    4.00
   8  -1   0   35.80    4.20
   8  -1   0   37.70    4.20
   8  -1   0   29.30    3.70
   8   1   0   28.50    4.10
  -8   1   0   26.30    4.00
   8   1   0   26.60    3.70
  -9  -1   0    7.10    2.30
   9  -1   0    4.30    1.80
   9  -1   0    6.30    2.30
   9   1   0    6.00    1.70
  -9   1   0    5.90    2.30
   9   1   0    5.70    2.10
  10  -1   0   11.40    3.00
 -10  -1   0    7.10    2.90
 -10   1   0    8.10    3.10
  10   1   0   11.10    3.10
 -11  -1   0    5.50    3.30
  11  -1   0    2.90    3.20
  11   1   0   -2.20    3.00
 -11   1   0   -0.10    2.90
 -12  -1   0    5.30    4.20
  12  -1   0    2.00    4.10
  12   1   0    8.90    4.10
 -12   1   0    8.70    4.20
   0  -2   0  789.42   72.09
   0  -2   0  754.12   72.09
   0   2   0  704.33   72.09
   0   2   0  737.13   72.09
  -1  -2   0 1119.89  112.59
   1  -2   0 1206.08  112.69
   1  -2   0 1061.89  112.59
  -1  -2   0 1147.89  112.59
  -1   2   0 1224.98  112.69
  -1   2   0 1312.07  112.89
  -1   2   0 1101.59  112.59
   1   2   0 1268.27  112.79
   1   2   0 1058.19  112.59
  -2  -2   0  438.76   39.60
   2  -2   0  390.36   39.70
  -2  -2   0  385.66   39.70
   2  -2   0  440.26   39.70
   2  -2   0  430.66   39.70
  -2  -2   0  422.66   39.60
   2   2   0  406.56   39.70
   2   2   0  443.36   39.60
  -2   2   0  341.47   39.60
  -2   2   0  392.86   39.70
  -3  -2   0 1053.99  101.29
   3  -2   0 1027.30  101.29
   3  -2   0 1057.09  101.29
   3  -2   0 1157.78  101.39
  -3  -2   0 1032.60  101.39
  -3   2   0  983.50  101.29
   3   2   0 1017.30  101.29
   3   2   0 1052.29  101.29
   4  -2   0  342.57   33.60
  -4  -2   0  327.57   33.40
   4  -2   0  310.67   33.40
   4   2   0  348.17   33.50
  -4   2   0  390.66   33.40
  -5  -2   0 1242.68  107.39
   5  -2   0  955.50  107.09
   5  -2   0 1147.39  107.29
  -5  -2   0 1199.28  107.19
   5   2   0  942.21  107.19
  -5   2   0 1239.38  107.39
  -5   2   0 1097.59  107.19
   5   2   0  964.30  107.09
   5   2   0 1191.28  107.19
  -6  -2   0  214.48   19.40
   6  -2   0  198.78   19.30
   6   2   0  171.68   19.10
   6   2   0  160.78   19.00
  -6   2   0  199.88   19.10
   6   2   0  209.18   19.10
  -6   2   0  210.08   19.30
   7  -2   0  447.76   42.40
   7  -2   0  407.46   42.60
  -7  -2   0  439.66   42.70
  -7   2   0  438.46   42.40
   7   2   0  438.36   42.50
  -7   2   0  437.96   42.60
   8  -2   0  283.67   23.50
  -8  -2   0  229.78   23.50
  -8   2   0  213.08   23.40
   8   2   0  223.98   23.10
   8   2   0  226.18   23.30
  -9  -2   0  176.38   19.90
   9  -2   0  219.28   19.90
   9  -2   0  191.28   19.40
   9   2   0  184.68   19.40
  -9   2   0  190.68   19.80
   9   2   0  212.48   19.80
  10  -2   0  128.29   12.10
 -10  -2   0   96.79   11.80
 -10   2   0  100.99   12.10
 -11  -2   0   83.09    9.80
  11  -2   0   84.19   10.10
 -11   2   0   79.39    9.90
  11   2   0   78.69    9.80
 -12  -2   0   46.30    6.70
  12  -2   0   34.40    6.40
  12   2   0   34.50    6.30
 -12   2   0   39.00    6.00
   0  -3   0    0.20    0.30
   0  -3   0    0.40    0.20
   0  -3   0    0.40    0.20
   0   3   0    0.00    0.20
   0   3   0    0.70    0.20
   0   3   0    0.30    0.40
   1  -3   0  336.97   33.60
  -1  -3   0  359.36   33.50
   1  -3   0  339.87   33.50
   1  -3   0  355.66   33.60
  -1  -3   0  339.27   33.60
  -1  -3   0  330.17   33.50
   1   3   0  353.86   33.50
   1   3   0  376.26   33.60
  -1   3   0  331.17   33.60
   1   3   0  320.97   33.60
  -1   3   0  352.66   33.50
  -1   3   0  360.06   33.60
   2  -3   0  103.49   10.70
  -2  -3   0  113.49   10.60
  -2  -3   0  109.09   10.60
   2  -3   0  114.39   10.70
  -2  -3   0  108.69   10.70
   2  -3   0  109.59   10.60
  -2   3   0  104.79   10.60
  -2   3   0  116.59   10.70
   2   3   0  101.89   10.60
   2   3   0  102.79   10.60
  -3  -3   0   11.30    1.50
  -3  -3   0   12.20    1.30
  -3  -3   0    9.90    1.20
   3  -3   0    8.40    1.30
   3  -3   0    9.40    1.40
   3  -3   0    9.80    1.40
   3   3   0    7.00    1.20
  -3   3   0    9.10    1.40
  -3   3   0   10.10    1.40
   3   3   0   10.30    1.30
   3   3   0    7.60    1.40
  -3   3   0    8.50    1.30
  -4  -3   0   29.30    3.30
   4  -3   0   23.60    3.10
   4  -3   0   30.90    3.30
  -4  -3   0   26.60    3.10
  -4   3   0   28.10    3.00
  -4   3   0   24.80    3.20
   4   3   0   28.80    3.00
   4   3   0   33.40    3.10
  -4   3   0   29.20    3.20
   4   3   0   22.90    3.30
  -5  -3   0  122.99   11.90
  -5  -3   0  135.49   11.70
   5  -3   0  118.19   11.80
   5  -3   0  101.89   11.70
   5   3   0  116.59   11.60
   5   3   0  107.29   11.60
  -5   3   0  116.09   11.60
   5   3   0  110.89   11.70
  -5   3   0  133.49   11.90
   6  -3   0   31.00    3.80
  -6  -3   0   34.30    4.10
   6   3   0   32.50    3.60
   6   3   0   25.20    3.60
  -6   3   0   34.60    3.90
   6   3   0   33.00    3.70
  -7  -3   0   42.20    5.00
   7  -3   0   44.00    4.70
   7  -3   0   41.90    4.80
  -7   3   0   34.50    4.80
   7   3   0   32.10    4.60
   7   3   0   33.10    4.30
   7   3   0   47.80    4.70
  -7   3   0   41.40    4.40
  -8  -3   0   11.50    2.90
   8  -3   0   14.10    2.50
   8   3   0   15.30    2.30
   8   3   0   20.00    2.80
  -8   3   0   13.00    2.60
  -8   3   0   16.60    2.40
   8   3   0   13.30    2.50
   9  -3   0   59.89    6.10
  -9  -3   0   39.30    6.00
   9   3   0   57.59    5.90
  -9   3   0   42.00    6.00
   9   3   0   40.10    5.50
  10  -3   0   11.60    3.10
 -10  -3   0   11.20    3.40
  11  -3   0   17.60    3.90
 -11  -3   0   15.00    4.20
  11   3   0   14.60    3.90
 -11   3   0   14.80    3.90
 -12  -3   0   22.80    5.10
  12  -3   0   25.50    5.30
  12   3   0   24.20    5.30
 -12   3   0   21.90    5.00
   0  -4   0  298.97   29.20
   0  -4   0  287.07   29.30
   0  -4   0  314.17   29.30
   0   4   0  298.77   29.20
   0   4   0  310.17   29.30
   1  -4   0 2452.35  274.17
  -1  -4   0 3146.89  274.47
  -1  -4   0 2534.15  274.17
   1   4   0 3006.10  274.47
   1   4   0 2786.12  274.57
  -1   4   0 2875.51  274.77
  -1   4   0 2934.71  274.37
   1   4   0 2993.30  274.57
   2  -4   0  377.66   38.20
  -2  -4   0  403.96   38.20
  -2  -4   0  393.66   38.10
  -2  -4   0  418.36   38.20
  -2   4   0  405.16   38.20
   2   4   0  411.26   38.20
  -2   4   0  321.87   38.10
  -2   4   0  414.76   38.10
   2   4   0  396.36   38.10
  -2   4   0  390.46   38.10
   3  -4   0 2356.96  218.68
   3  -4   0 2132.39  218.68
  -3  -4   0 2151.48  218.58
  -3  -4   0 2372.86  218.68
  -3  -4   0 2243.98  218.78
   3   4   0 2402.06  218.68
  -3   4   0 2186.98  218.68
   3   4   0 2133.19  218.58
  -3   4   0 2393.36  218.68
   4  -4   0  101.69   10.60
  -4  -4   0   88.59   10.50
  -4  -4   0   93.09   10.50
   4  -4   0  115.59   10.70
   4  -4   0   92.79   10.60
  -4   4   0  122.79   10.70
  -4   4   0  119.79   10.60
   4   4   0  108.59   10.50
   4   4   0  124.79   10.80
  -4   4   0   89.49   10.50
   4   4   0  115.29   10.50
  -5  -4   0 1208.98  123.39
   5  -4   0 1415.26  123.39
   5   4   0 1289.57  123.29
   5   4   0 1183.38  123.19
   6  -4   0    1.80    1.10
   6  -4   0    0.80    1.20
  -6  -4   0    0.60    1.20
   6   4   0    0.90    1.10
   6   4   0    0.80    0.90
  -6   4   0    0.90    1.10
  -6   4   0    0.10    0.90
   7  -4   0  692.93   58.99
  -7  -4   0  534.55   59.19
  -7   4   0  690.93   58.99
   7   4   0  567.54   58.89
  -7   4   0  555.74   59.09
   7   4   0  592.64   58.99
   8  -4   0    3.30    1.60
  -8  -4   0    2.20    1.80
  -8   4   0    0.40    1.70
   8   4   0    3.50    1.40
  -8   4   0    0.50    1.30
   8   4   0    1.90    1.50
   9  -4   0  384.26   32.70
  -9   4   0  275.97   32.20
   9   4   0  379.76   32.40
   9   4   0  278.17   32.00
  10  -4   0    8.90    3.00
 -10  -4   0   11.10    3.50
 -10   4   0    9.20    3.00
 -11  -4   0  145.99   15.00
  11  -4   0  133.79   14.70
  11   4   0  145.69   14.80
 -11   4   0  117.79   14.50
  12  -4   0    1.40    4.10
 -12  -4   0   -0.60    4.20
  12   4   0   -5.10    4.20
 -12   4   0    2.60    4.10
   0  -5   0    0.20    0.30
   0  -5   0    0.20    0.40
   0  -5   0    0.70    0.40
   0   5   0    0.60    0.40
   0   5   0   -0.10    0.30
   0   5   0   -0.30    0.40
  -1  -5   0    3.90    0.60
   1  -5   0    3.60    0.50
   1  -5   0    4.40    0.80
   1  -5   0    3.50    0.60
  -1  -5   0    3.10    0.70
   1   5   0    3.60    0.70
  -1   5   0    2.40    0.60
  -1   5   0    3.90    0.60
   1   5   0    2.20    0.60
  -1   5   0    2.00    0.60
  -2  -5   0  153.08   17.40
  -2  -5   0  195.08   17.50
   2  -5   0  156.78   17.50
  -2  -5   0  202.18   17.40
  -2   5   0  192.68   17.50
   2   5   0  196.08   17.40
   2   5   0  155.48   17.50
   2   5   0  198.68   17.50
  -2   5   0  160.08   17.50
  -2   5   0  173.98   17.40
  -3  -5   0   87.29    9.20
   3  -5   0   97.69    9.40
  -3  -5   0   85.59    9.30
   3   5   0  104.09    9.30
  -3   5   0   81.29    9.40
  -3   5   0   91.69    9.30
  -3   5   0  107.79    9.40
   3   5   0   77.29    9.40
   3   5   0  108.99    9.40
  -4  -5   0   15.00    2.10
   4  -5   0   11.20    1.90
   4  -5   0   14.60    2.00
  -4  -5   0   12.10    1.70
  -4  -5   0   13.30    1.90
   4   5   0   15.40    1.90
   4   5   0   13.80    1.80
  -4   5   0   12.10    2.00
  -4   5   0   16.70    2.00
  -4   5   0   14.90    1.90
   4   5   0   13.00    2.10
   5  -5   0  129.39   14.60
   5  -5   0  123.39   14.60
   5  -5   0  127.79   14.60
  -5  -5   0  160.98   14.80
  -5   5   0  178.58   14.70
   5   5   0  163.88   14.60
   6  -5   0    2.60    1.30
   6  -5   0    3.70    1.50
  -6  -5   0    3.90    1.60
  -6   5   0    3.20    1.00
  -6   5   0    2.00    1.20
   6   5   0    2.50    1.10
   6   5   0    3.80    1.40
   6   5   0    2.90    1.20
  -7  -5   0   38.60    5.20
   7  -5   0   45.70    5.20
  -7   5   0   43.90    4.80
  -7   5   0   33.80    4.90
   7   5   0   43.00    4.80
   7   5   0   52.09    5.20
   7   5   0   36.30    4.70
  -8  -5   0   11.40    2.70
   8  -5   0   10.00    2.50
  -8   5   0   11.10    2.50
   8   5   0   12.60    2.30
  -8   5   0   13.50    2.20
   8   5   0   10.20    2.10
  -9  -5   0   53.69    7.20
   9  -5   0   62.49    7.10
  -9   5   0   57.29    6.70
   9   5   0   64.99    6.80
  -9   5   0   56.49    7.00
  10  -5   0   -0.90    2.60
 -10  -5   0    0.90    2.90
 -10   5   0    1.70    2.60
  10   5   0    2.80    2.60
 -11  -5   0   49.20    6.90
  11  -5   0   56.69    7.70
  11   5   0   43.60    6.70
 -11   5   0   46.00    7.00
 -12  -5   0    0.60    4.20
  12  -5   0    3.50    4.20
 -12   5   0    4.10    4.10
  12   5   0    3.60    4.50
   0  -6   0  943.61   87.69
   0  -6   0  875.91   87.59
   0   6   0  835.22   87.69
   0   6   0  983.30   87.59
   0   6   0  893.11   87.69
  -1  -6   0  813.02   87.19
  -1  -6   0 1007.10   87.09
   1  -6   0  936.71   86.99
   1  -6   0  800.92   87.19
  -1  -6   0 1001.50   87.09
  -1   6   0  872.31   87.09
  -1   6   0  996.00   86.99
  -1   6   0  808.32   87.19
   1   6   0  865.21   87.09
   2  -6   0  613.04   64.19
  -2  -6   0  625.54   64.19
  -2  -6   0  594.24   64.09
  -2  -6   0  766.72   64.29
   2  -6   0  604.24   64.19
  -2   6   0  746.43   64.29
  -2   6   0  758.32   64.09
   2   6   0  647.04   64.09
  -2   6   0  584.24   64.19
   2   6   0  756.92   64.29
   2   6   0  594.14   64.19
   3  -6   0  409.06   48.40
  -3  -6   0  531.25   48.50
  -3  -6   0  436.06   48.30
   3   6   0  518.05   48.40
  -3   6   0  536.45   48.40
  -3   6   0  537.05   48.30
   3   6   0  524.35   48.40
   4  -6   0  474.25   43.70
  -4  -6   0  448.66   43.70
  -4   6   0  413.46   43.50
   4   6   0  440.76   43.50
  -4   6   0  466.95   43.60
  -5  -6   0  518.35   47.30
   5  -6   0  530.55   47.20
  -5  -6   0  506.15   47.10
  -5   6   0  385.56   47.10
   5   6   0  452.95   47.00
   5   6   0  516.05   47.10
   6  -6   0  153.58   18.90
  -6  -6   0  201.38   19.10
   6   6   0  206.58   18.90
  -6   6   0  204.18   18.90
   6   6   0  186.28   18.80
  -7  -6   0  385.16   34.10
   7  -6   0  344.77   34.00
  -7   6   0  327.17   33.70
   7   6   0  336.07   33.70
  -7   6   0  333.77   33.80
   8  -6   0  155.48   14.00
   8   6   0  125.49   13.50
  -8   6   0  132.19   13.50
   8   6   0  140.69   13.70
  -8   6   0  117.99   13.70
  -9  -6   0  110.49   12.20
   9   6   0  114.39   11.60
   9   6   0  113.49   11.80
  -9   6   0  111.79   11.80
  -9   6   0  106.29   11.50
  10  -6   0   40.10    5.70
 -10  -6   0   44.20    6.20
 -10   6   0   37.90    5.60
  10   6   0   42.70    6.10
 -11  -6   0   78.69    9.80
  11  -6   0   68.09    9.30
 -11   6   0   82.79    9.50
  11   6   0   66.89    9.40
  12  -6   0   32.10    5.90
  12   6   0   21.60    5.40
   0  -7   0    0.00    0.50
   0  -7   0   -0.50    0.70
   0  -7   0    0.30    0.50
   0   7   0    0.30    0.60
   0   7   0    0.10    0.50
  -1  -7   0    5.30    0.90
   1  -7   0    1.80    0.90
  -1  -7   0    5.00    0.80
   1  -7   0    3.50    0.60
  -1  -7   0    2.90    0.90
   1  -7   0    5.30    0.90
  -1  -7   0    4.70    0.90
  -1   7   0    4.60    0.80
   1   7   0    4.60    0.90
  -1   7   0    4.50    0.90
   2  -7   0   17.50    2.50
  -2  -7   0   18.60    2.20
   2  -7   0   21.40    2.10
  -2  -7   0   15.70    2.40
   2   7   0   20.90    2.40
  -2   7   0   20.00    2.10
  -2   7   0   15.20    2.30
  -3  -7   0    6.10    1.10
  -3  -7   0    2.30    1.00
  -3  -7   0    4.50    0.90
   3  -7   0    3.20    1.20
   3  -7   0    3.30    1.00
  -3   7   0    4.50    0.90
  -3   7   0    4.80    1.10
   3   7   0    4.80    0.80
  -3   7   0    4.70    1.10
  -3   7   0    4.50    0.80
   3   7   0    4.60    1.20
   4  -7   0   74.29    7.00
   4  -7   0   73.79    7.20
  -4  -7   0   66.59    7.00
   4   7   0   72.39    6.90
  -4   7   0   52.09    6.90
  -4   7   0   69.79    6.90
  -4   7   0   61.59    6.80
   5  -7   0   11.90    2.00
  -5  -7   0   15.20    2.10
  -5  -7   0   12.30    2.10
  -5  -7   0   11.80    1.90
   5   7   0   10.60    1.60
  -5   7   0    8.20    1.80
  -5   7   0    7.40    1.60
   5   7   0   10.00    1.70
   6  -7   0   90.29    8.90
  -6  -7   0   93.19    9.00
  -6   7   0   86.09    8.70
  -6   7   0   76.59    8.70
   6   7   0   72.79    8.60
   6   7   0   85.89    8.60
  -7  -7   0    3.20    1.90
   7  -7   0    0.10    1.50
   7   7   0    3.10    1.30
  -7   7   0    3.00    1.50
  -7   7   0    2.30    1.50
   7   7   0    5.20    1.50
  -8   7   0   52.19    6.30
   8   7   0   52.59    6.10
   8   7   0   47.80    6.10
  -8   7   0   60.49    6.20
   9  -7   0   16.20    3.50
  -9  -7   0   15.70    3.60
   9   7   0   20.70    3.10
  -9   7   0   19.50    3.20
  -9   7   0   21.80    3.20
   9   7   0   17.20    3.10
 -10  -7   0    8.80    3.50
  10  -7   0    7.10    2.80
  10   7   0   11.10    2.90
 -10   7   0   11.60    3.30
  11  -7   0   16.50    4.20
 -11  -7   0   24.20    5.30
 -11   7   0   20.70    4.40
  11   7   0   21.20    4.40
   0  -8   0 1509.25  137.79
   0  -8   0 1483.75  137.69
   0   8   0 1555.14  137.89
   0   8   0 1318.37  137.69
   0   8   0 1260.17  137.69
  -1  -8   0   68.29    6.90
  -1  -8   0   71.79    6.80
   1  -8   0   72.69    7.10
   1  -8   0   68.09    6.80
  -1  -8   0   62.89    6.90
   1  -8   0   75.79    7.00
  -1   8   0   73.09    7.10
   1   8   0   78.59    7.10
   1   8   0   54.59    6.90
  -1   8   0   73.19    6.80
  -1   8   0   54.79    6.90
   2  -8   0 1700.93  152.18
  -2  -8   0 1310.47  152.38
  -2  -8   0 1363.36  152.28
   2  -8   0 1722.73  152.48
   2  -8   0 1705.13  152.38
  -2   8   0 1483.85  152.18
  -2   8   0 1641.44  152.48
   2   8   0 1680.03  152.48
   3  -8   0  296.57   27.00
  -3  -8   0  283.07   26.90
  -3  -8   0  233.08   26.70
  -3  -8   0  285.67   26.90
   3  -8   0  290.07   26.90
   3   8   0  276.77   26.70
  -3   8   0  272.27   26.90
   3   8   0  281.37   26.90
  -3   8   0  254.47   26.70
   4  -8   0 1321.17  128.69
  -4  -8   0 1365.26  128.69
  -4  -8   0 1410.96  128.69
   4   8   0 1350.66  128.69
  -4   8   0 1220.48  128.49
  -4   8   0 1362.66  128.69
  -4   8   0 1271.37  128.49
  -5  -8   0   98.89    9.90
   5  -8   0   96.89   10.10
  -5  -8   0   98.79   10.00
   5   8   0  107.69   10.00
  -5   8   0   79.89    9.80
  -5   8   0  106.19   10.10
  -6  -8   0  667.33   58.59
   6   8   0  672.93   58.29
   6   8   0  544.95   58.29
  -6   8   0  516.85   58.39
  -7  -8   0    5.20    2.20
   7  -8   0    3.30    1.70
   7   8   0    6.10    1.80
  -7   8   0    2.80    1.70
  -7   8   0    4.20    1.70
   7   8   0    8.10    1.70
  -8  -8   0  305.17   32.40
   8   8   0  341.97   31.90
   8   8   0  330.27   31.90
  -8   8   0  314.97   31.90
  -9  -8   0   20.40    3.90
   9  -8   0   20.10    3.80
   9   8   0   18.90    3.30
  -9   8   0   19.70    3.30
   9   8   0   21.00    3.50
  -9   8   0   20.10    3.40
  10  -8   0  148.99   15.60
 -10  -8   0  142.49   15.80
  10   8   0  148.59   15.50
 -10   8   0  140.09   15.30
  11  -8   0    1.50    3.60
 -11  -8   0   -0.20    4.10
  11   8   0   10.70    3.80
   0  -9   0    1.40    1.00
   0  -9   0    1.30    0.60
   0  -9   0    0.70    0.60
   0   9   0   -0.10    0.70
   0   9   0    0.20    0.80
   0   9   0    2.10    0.90
   1  -9   0   26.60    2.90
  -1  -9   0   27.60    2.70
  -1  -9   0   27.50    3.10
   1  -9   0   25.40    2.60
  -1  -9   0   21.90    2.90
   1   9   0   21.70    3.00
  -1   9   0   22.10    2.70
  -1   9   0   20.60    2.90
   1   9   0   24.10    2.80
  -1   9   0   22.10    3.00
  -2  -9   0   17.70    2.20
  -2  -9   0   21.70    2.40
   2  -9   0   22.00    2.50
   2  -9   0   19.60    2.10
  -2  -9   0   16.80    2.40
  -2   9   0   17.40    2.50
   2   9   0   18.00    2.50
   2   9   0   21.70    2.70
  -2   9   0   14.80    2.20
  -2   9   0   19.70    2.70
  -3  -9   0   12.70    2.00
  -3  -9   0   12.30    2.00
   3  -9   0   14.90    2.20
  -3   9   0   12.40    1.70
  -3   9   0   11.00    1.90
   3   9   0   13.30    2.10
  -3   9   0   13.90    1.90
  -4  -9   0    2.70    1.10
   4  -9   0    4.90    1.40
  -4  -9   0    5.00    1.50
  -4   9   0    4.80    1.20
   4   9   0    6.00    1.30
  -4   9   0    5.30    1.20
  -4   9   0    2.20    1.20
  -5  -9   0   34.30    4.00
  -5  -9   0   35.20    3.90
   5  -9   0   27.90    4.00
   5   9   0   34.30    3.90
   5   9   0   25.60    3.50
  -5   9   0   28.60    3.80
  -5   9   0   38.00    4.00
   6  -9   0    2.80    1.50
  -6  -9   0   -0.30    1.40
  -6   9   0   -1.10    1.30
   6   9   0    2.80    1.40
  -6   9   0    0.00    1.30
   6   9   0    0.50    1.00
  -7  -9   0    8.90    2.40
   7  -9   0    3.80    1.90
   7   9   0    6.80    1.90
   7   9   0    7.30    1.70
  -7   9   0    2.30    1.80
  -7   9   0    4.90    1.80
   8  -9   0   11.80    2.60
  -8  -9   0    5.60    2.50
   8   9   0    6.00    2.10
  -8   9   0    8.60    2.30
   8   9   0    8.50    2.30
  -8   9   0    8.70    2.30
  -9  -9   0    3.10    2.90
   9  -9   0    1.10    2.40
   9   9   0    0.50    2.40
  -9   9   0    6.30    2.40
   9   9   0    1.20    2.10
  -9   9   0    0.60    2.30
 -10  -9   0   34.10    5.90
  10  -9   0   36.60    5.90
 -10   9   0   56.59    6.60
 -11  -9   0    2.70    3.80
  11  -9   0   -5.90    3.60
   0 -10   0 1141.49  104.49
   0  10   0 1161.78  104.79
   0  10   0  940.01  104.49
   1 -10   0  593.24   55.79
  -1 -10   0  471.15   55.69
   1 -10   0  582.44   55.59
  -1  10   0  623.44   55.99
   1  10   0  637.04   55.99
  -1  10   0  545.55   55.69
   2 -10   0 1035.50   98.19
  -2 -10   0  980.00   98.39
   2 -10   0  975.80   98.39
  -2  10   0 1043.80   98.59
   2  10   0 1018.80   98.49
   2  10   0 1040.70   98.49
  -3 -10   0  258.77   24.20
   3 -10   0  261.07   24.30
  -3  10   0  228.28   24.00
  -3  10   0  253.27   24.40
  -3  10   0  275.37   24.10
   3  10   0  203.58   24.20
  -4 -10   0 1050.29  114.99
   4  10   0 1094.89  114.79
   4  10   0 1363.26  115.09
  -4  10   0 1026.90  114.69
  -4  10   0 1259.07  114.89
  -4  10   0 1334.57  115.19
  -5 -10   0  112.29   10.40
   5 -10   0   96.39   10.40
  -5  10   0   81.89   10.10
  -5  10   0   84.09   10.20
   5  10   0   99.69   10.30
  -5  10   0  119.39   10.10
   5  10   0  102.19   10.00
  -6 -10   0  274.07   29.20
   6 -10   0  312.37   29.30
   6  10   0  257.77   29.10
  -6  10   0  286.87   29.00
   6  10   0  342.07   29.00
   7 -10   0  100.89   10.80
  -7 -10   0  100.79   10.80
   7  10   0   98.29   10.60
  -7  10   0   93.89   10.50
  -7  10   0  108.99   10.80
   7  10   0  100.99   10.40
   8 -10   0  187.28   19.80
  -8 -10   0  235.18   20.10
  -8  10   0  175.28   19.40
   8  10   0  199.98   19.60
  -8  10   0  197.88   19.70
   8  10   0  178.08   19.40
   9 -10   0   49.70    6.90
  -9 -10   0   44.90    6.70
  -9  10   0   50.99    6.60
   9  10   0   60.09    6.80
   9  10   0   41.60    6.40
  -9  10   0   53.79    6.70
 -10 -10   0   89.19   10.50
  10 -10   0   82.69   10.40
 -11 -10   0   28.80    5.90
  11 -10   0   20.00    5.10
   0 -11   0   -0.10    0.70
   0  11   0    2.00    1.10
   0  11   0   -1.10    1.10
   1 -11   0    9.20    1.60
   1 -11   0   10.90    1.50
  -1 -11   0    9.40    1.50
  -1 -11   0    7.80    1.50
  -1 -11   0   10.70    1.80
   1  11   0   11.10    1.90
  -1  11   0   11.90    1.70
   1  11   0   11.30    1.90
  -1  11   0    7.90    1.80
   2 -11   0   14.60    1.70
  -2 -11   0    9.30    1.90
  -2 -11   0   12.60    1.90
   2 -11   0   15.30    2.10
  -2 -11   0   14.10    2.00
  -2  11   0   13.70    1.90
  -2  11   0    8.20    2.00
   2  11   0   16.10    2.40
  -3 -11   0   13.20    2.00
  -3 -11   0   13.60    1.80
  -3 -11   0   10.50    1.80
   3 -11   0    6.70    1.80
  -3  11   0    8.70    1.60
  -3  11   0   10.70    2.20
  -3  11   0   11.60    1.70
   3  11   0   10.70    2.10
   4 -11   0   20.30    2.80
  -4 -11   0   20.90    2.80
  -4 -11   0   20.30    2.70
  -4  11   0   13.70    2.30
  -4  11   0   18.80    2.80
   4  11   0   15.00    2.60
  -4  11   0   15.70    2.20
  -5 -11   0   70.49    6.90
   5 -11   0   46.40    6.70
  -5  11   0   65.19    6.90
  -5  11   0   56.89    6.50
   5  11   0   65.39    6.40
   5  11   0   46.70    6.70
  -5  11   0   74.59    6.60
  -6 -11   0   13.10    2.70
   6 -11   0   11.00    2.20
   6  11   0   12.00    1.90
  -6  11   0   11.40    2.10
  -6  11   0   11.40    2.60
   6  11   0   10.40    2.50
  -7 -11   0    6.70    2.30
   7  11   0    5.00    1.60
  -7  11   0    9.60    2.50
  -7  11   0    1.60    1.80
   7  11   0    3.30    2.10
  -8 -11   0    1.00    2.30
   8 -11   0    3.40    2.40
  -8  11   0    0.40    2.20
   8  11   0    2.20    1.80
  -8  11   0    0.90    2.20
   8  11   0    5.90    2.50
   9 -11   0    4.80    3.00
  -9 -11   0    2.50    3.00
   9  11   0    0.60    2.40
  -9  11   0    7.30    3.00
   9  11   0    3.20    2.70
  10 -11   0   57.49    8.40
 -10 -11   0   56.69    8.50
   0 -12   0  199.58   18.20
   0 -12   0  180.88   18.10
   0  12   0  176.58   18.20
   0  12   0  178.48   18.40
  -1 -12   0 1580.94  143.49
  -1 -12   0 1413.46  143.39
  -1 -12   0 1463.65  143.39
  -1  12   0 1401.96  143.59
   1  12   0 1576.94  143.49
   1  12   0 1457.25  143.69
   2 -12   0   44.60    4.60
   2 -12   0   43.50    4.20
  -2 -12   0   42.10    4.40
  -2 -12   0   44.60    4.60
   2  12   0   34.60    4.70
  -2  12   0   37.10    4.80
  -2  12   0   31.00    4.40
  -3 -12   0 1484.35  123.99
   3 -12   0 1121.69  123.89
  -3  12   0 1205.98  123.69
  -3  12   0 1117.09  123.59
  -3  12   0 1475.05  124.19
   4 -12   0   48.90    6.20
  -4 -12   0   68.79    6.30
  -4 -12   0   51.29    5.90
  -4  12   0   53.19    5.90
  -4  12   0   69.19    6.40
   4  12   0   46.60    6.20
   5 -12   0  528.75   49.90
  -5  12   0  506.05   49.50
  -5  12   0  501.65   49.90
   5  12   0  498.25   49.80
  -6 -12   0    7.60    2.50
   6 -12   0    9.00    2.30
  -6  12   0   10.90    2.60
   6  12   0   12.80    2.00
  -6  12   0   11.60    2.10
   6  12   0    7.80    2.30
  -7 -12   0  202.28   21.00
   7 -12   0  199.28   21.00
   7  12   0  216.88   20.90
   7  12   0  196.78   20.50
  -7  12   0  219.28   20.70
  -8 -12   0   -2.60    2.90
   8 -12   0   -0.80    2.30
   8  12   0    0.80    1.80
   8  12   0    4.00    2.60
  -8  12   0    2.30    2.60
  -9 -12   0  288.07   33.60
   9 -12   0  323.07   33.70
  -9  12   0  284.87   33.60
   9  12   0  396.56   33.60
   9  12   0  379.86   33.50
 -10 -12   0   -1.80    4.30
  10 -12   0    8.30    4.00
   0 -13   0    1.30    0.90
   0 -13   0    0.60    0.90
   0  13   0    1.00    1.50
   0  13   0    0.30    1.30
   1 -13   0   16.10    2.60
  -1 -13   0   16.90    2.50
  -1 -13   0   21.00    2.60
   1  13   0   17.80    2.80
  -1  13   0   18.90    2.60
  -1  13   0   23.30    3.20
   2 -13   0    3.40    1.20
  -2 -13   0    1.10    1.20
  -2 -13   0    2.50    1.10
   2  13   0    1.30    1.30
  -2  13   0    0.30    1.50
  -2  13   0    1.20    1.40
  -3 -13   0   11.40    1.80
  -3 -13   0    4.00    1.30
   3 -13   0    3.70    1.50
   3  13   0    5.60    1.80
  -3  13   0    7.90    2.00
  -3  13   0    4.40    1.60
  -4 -13   0   10.20    1.80
  -4 -13   0    9.60    2.10
   4 -13   0    9.20    2.00
  -4  13   0    9.90    2.40
  -4  13   0    9.50    1.80
   4  13   0   10.60    2.20
  -5 -13   0   29.50    4.00
   5 -13   0   22.00    3.60
   5  13   0   24.60    3.70
  -5  13   0   26.00    3.60
   6 -13   0    2.20    2.00
  -6 -13   0    0.20    1.90
  -6  13   0    3.40    2.10
  -6  13   0    1.60    1.70
   6  13   0    0.60    2.00
  -7 -13   0   21.00    3.60
   7 -13   0   17.70    3.60
   7  13   0   16.70    3.40
   7  13   0   17.50    2.80
  -7  13   0   19.80    3.60
  -7  13   0   19.20    3.10
   8 -13   0   12.80    3.30
  -8 -13   0   17.30    3.50
   8  13   0   14.90    2.90
  -8  13   0   12.70    3.70
   8  13   0   16.10    3.70
  -9 -13   0   37.50    5.90
   9 -13   0   27.10    5.50
  -9  13   0   40.40    5.70
  10 -13   0    6.60    4.10
 -10 -13   0   -2.30    4.10
   0 -14   0   61.79    6.10
   0 -14   0   52.19    6.10
   0  14   0   59.09    6.60
   1 -14   0  238.88   25.20
   1 -14   0  250.17   25.50
  -1 -14   0  264.77   25.40
  -1  14   0  269.17   25.40
  -1  14   0  272.77   25.80
  -2 -14   0   50.49    5.40
   2 -14   0   48.80    5.60
   2  14   0   46.90    5.90
  -2  14   0   51.49    5.90
  -3 -14   0   67.89    8.20
   3 -14   0   65.19    8.40
  -3 -14   0   95.19    8.50
   3  14   0   70.29    8.60
  -3  14   0   89.59    8.90
  -3  14   0   95.69    8.40
  -4 -14   0  152.48   15.60
  -4 -14   0  180.88   15.90
   4 -14   0  152.68   15.90
   4  14   0  139.59   16.00
   5 -14   0  129.79   14.70
  -5 -14   0  144.59   14.40
  -5 -14   0  173.48   14.80
   5  14   0  121.89   14.70
  -5  14   0  140.99   14.30
  -5  14   0  147.19   14.90
   6 -14   0   43.00    5.90
   6  14   0   33.10    5.70
  -6  14   0   47.40    6.10
  -6  14   0   47.50    5.40
   7 -14   0  125.59   15.00
  -7 -14   0  170.18   15.20
   7  14   0  133.69   15.00
   8 -14   0   48.60    7.40
  -8 -14   0   57.89    7.50
  -8  14   0   54.19    7.60
  -9 -14   0   91.89   11.70
  -9  14   0  104.79   11.90
   0 -15   0    2.10    1.20
   0 -15   0   -0.80    1.10
   0  15   0    0.40    1.80
  -1 -15   0   36.40    3.90
   1 -15   0   28.40    3.50
  -1 -15   0   22.00    3.60
   1 -15   0   27.00    3.80
  -1  15   0   33.30    4.50
   1  15   0   38.60    4.40
   2 -15   0   21.20    3.30
  -2 -15   0   22.20    3.30
   2 -15   0   24.90    3.00
  -2 -15   0   28.60    3.20
   2  15   0   24.70    3.90
  -2  15   0   29.00    4.20
  -3 -15   0   37.80    4.30
   3 -15   0   27.70    4.30
  -3 -15   0   30.20    3.90
  -3  15   0   31.60    4.80
   3  15   0   31.80    4.70
   4 -15   0    2.60    1.80
  -4 -15   0    3.40    2.00
  -4 -15   0    1.10    1.40
  -4  15   0    1.70    1.60
   4  15   0    4.20    2.00
  -4  15   0    1.50    2.00
  -5 -15   0   35.00    5.00
  -5 -15   0   28.30    4.30
   5 -15   0   30.10    4.80
  -5  15   0   31.40    4.80
  -5  15   0   38.50    4.50
   5  15   0   33.40    4.80
   6 -15   0    4.80    2.40
  -6 -15   0    2.40    2.00
  -6 -15   0    0.90    2.40
   6  15   0   -1.30    2.50
  -7 -15   0   84.59    8.80
   7 -15   0   63.89    8.60
  -7  15   0   62.69    8.80
  -8 -15   0    1.20    3.00
   8 -15   0    0.70    3.10
   8  15   0    2.90    3.40
  -8  15   0    1.80    3.80
   9 -15   0   86.69    9.90
  -9  15   0   61.39    9.10
   0 -16   0  326.57   32.80
   0  16   0  343.37   33.30
   1 -16   0  136.69   13.80
  -1 -16   0  139.99   14.00
  -1 -16   0  149.79   14.00
   1  16   0  109.59   14.40
  -1  16   0  164.08   14.80
  -2 -16   0  192.08   20.80
   2 -16   0  201.88   21.00
  -2 -16   0  208.48   20.80
   2 -16   0  203.48   20.60
  -2  16   0  244.78   21.40
   2  16   0  215.88   21.30
   3 -16   0   44.40    6.20
  -3 -16   0   62.09    6.40
  -3 -16   0   48.70    5.90
  -3  16   0   57.09    6.00
  -3  16   0   58.29    6.80
   3  16   0   51.99    6.60
  -4 -16   0  355.26   34.70
   4 -16   0  339.27   35.00
  -4  16   0  348.47   34.70
   4  16   0  374.36   35.20
  -5 -16   0   44.40    5.40
   5 -16   0   38.20    6.00
  -5  16   0   49.80    6.50
  -6 -16   0  245.98   21.90
   6 -16   0  191.88   21.80
  -6  16   0  245.48   22.10
   6  16   0  177.18   21.80
  -7 -16   0   44.20    6.30
   7 -16   0   60.99    7.30
  -7  16   0   41.00    6.40
   7  16   0   45.60    6.50
  -8 -16   0   72.59   11.50
   8 -16   0  113.89   11.80
   8  16   0  103.09   11.90
  -8  16   0  101.39   12.20
  -9 -16   0    1.70    4.90
   9 -16   0    5.00    4.20
  -9  16   0    3.30    4.60
   0 -17   0    0.80    1.50
   0 -17   0    2.10    1.40
   0  17   0    0.30    1.90
  -1 -17   0    9.30    1.90
  -1 -17   0    6.80    1.70
   1 -17   0   10.10    2.10
   1 -17   0    6.60    1.60
  -1  17   0    7.30    2.90
   1  17   0    5.70    2.60
   2 -17   0   21.10    3.40
   2 -17   0   20.70    3.00
  -2 -17   0   20.20    3.00
  -2 -17   0   26.80    3.70
   3 -17   0    5.20    2.20
  -3 -17   0    5.70    2.40
  -3 -17   0    5.90    1.70
  -3  17   0    7.40    2.00
  -3  17   0    2.80    2.30
  -4 -17   0   -2.00    1.70
  -4 -17   0    4.70    2.30
   4  17   0   -0.80    2.30
  -4  17   0   -0.70    2.30
  -5 -17   0    2.10    2.10
  -5 -17   0    7.50    2.70
   5 -17   0    3.90    2.50
   5  17   0    4.90    3.00
  -5  17   0    4.20    3.20
   6 -17   0    1.60    2.80
  -6 -17   0    0.40    2.80
   6  17   0    1.30    3.00
  -6  17   0    3.20    3.10
  -7 -17   0    6.00    3.60
   7 -17   0   11.10    3.50
   7  17   0    3.70    3.80
  -7  17   0   -1.70    3.30
  -8 -17   0    8.90    4.70
   8 -17   0   16.40    4.50
  -8  17   0   15.40    5.10
   8  17   0   13.30    5.00
   0 -18   0  136.69   13.90
   0 -18   0  139.49   14.10
   0  18   0  137.49   14.70
  -1 -18   0   62.59    6.90
   1 -18   0   60.59    6.60
  -1 -18   0   60.89    7.00
   1 -18   0   61.59    7.10
   1  18   0   63.79    7.70
  -1  18   0   60.19    7.70
   2 -18   0  176.18   18.50
   2 -18   0  167.68   18.00
  -2 -18   0  197.88   18.40
  -2 -18   0  191.88   18.20
   2  18   0  178.48   18.90
  -2  18   0  182.58   19.00
  -3 -18   0   27.30    4.10
   3 -18   0   27.10    4.30
  -3 -18   0   33.10    4.30
   3  18   0   28.30    4.50
  -3  18   0   33.50    5.20
   4 -18   0  184.48   20.70
  -4 -18   0  236.28   20.40
   4  18   0  191.38   21.00
  -4  18   0  194.18   21.00
  -5 -18   0   40.10    5.00
   5 -18   0   25.20    4.70
   5  18   0   32.20    5.30
  -5  18   0   29.50    5.30
   6 -18   0  108.09   11.80
  -6 -18   0  102.89   11.70
  -6  18   0  106.89   12.10
   6  18   0   95.89   12.20
   7 -18   0   27.20    4.50
  -7 -18   0   14.50    4.40
  -7  18   0   10.40    4.60
   7  18   0   23.70    5.00
   8 -18   0   45.40    7.30
  -8 -18   0   49.30    7.30
  -8  18   0   44.00    7.80
   8  18   0   57.99    7.80
   0 -19   0    1.20    1.80
   0 -19   0   -0.60    2.00
   0  19   0   -2.00    2.70
   1 -19   0    0.10    2.00
  -1 -19   0    4.70    2.10
  -1 -19   0   -0.90    2.00
   1 -19   0    0.30    1.50
   1  19   0    0.70    2.70
  -1  19   0    0.70    2.80
   2 -19   0   -0.60    2.20
  -2 -19   0   -1.10    2.00
  -2 -19   0    0.20    1.90
   2  19   0    1.40    2.80
  -2  19   0    2.30    2.60
  -3 -19   0    0.90    1.90
  -3 -19   0   -0.40    2.60
   3 -19   0    1.20    2.20
   3  19   0    1.60    3.00
  -3  19   0   -1.20    2.80
  -4 -19   0    6.70    3.00
   4 -19   0    9.80    3.00
  -4  19   0    5.10    3.30
   4  19   0   13.70    3.60
  -5 -19   0   -1.80    3.10
   5 -19   0   -0.10    3.00
  -5  19   0    2.80    3.60
   5  19   0    7.90    3.60
   6 -19   0    9.70    3.70
  -6 -19   0    6.50    3.70
  -6  19   0   11.50    4.10
   6  19   0   19.20    4.40
  -7 -19   0    4.00    4.00
   7 -19   0    3.50    3.90
   7  19   0    4.20    4.60
  -7  19   0   -1.50    4.20
   0 -20   0   97.29   10.20
   0  20   0   87.79   11.00
  -1 -20   0  112.69   12.70
   1 -20   0  116.39   13.00
  -1 -20   0  141.39   12.80
   1  20   0  116.29   13.70
  -1  20   0  120.39   13.60
  -2 -20   0   89.89    8.80
  -2 -20   0   78.19    8.90
   2 -20   0   68.29    9.10
   2  20   0   76.99    9.70
  -2  20   0   76.99    9.90
   3 -20   0  119.39   13.00
  -3 -20   0  117.29   12.90
  -3  20   0  115.69   13.50
   3  20   0  122.99   13.60
   4 -20   0   44.20    6.90
  -4 -20   0   45.50    6.20
   4  20   0   47.50    7.00
  -4  20   0   49.20    7.30
  -5 -20   0  102.89   11.70
  -5  20   0   93.89   12.20
  -6 -20   0   33.80    6.60
  -6  20   0   47.40    7.20
   6  20   0   71.39    9.40
   0  21   0   -0.70    3.40
   1 -21   0   -2.70    2.60
  -1 -21   0   -1.50    2.60
  -1  21   0    1.60    3.70
   1  21   0    0.00    3.70
  -2 -21   0   -0.20    2.90
   2 -21   0    4.60    2.90
  -2  21   0    3.70    3.70
   2  21   0   -0.60    3.60
   3 -21   0    1.60    3.20
  -3 -21   0   -4.30    2.90
   3  21   0    3.20    3.80
  -3  21   0    2.20    3.60
   4 -21   0    4.10    3.60
  -4 -21   0    8.60    3.70
   4  21   0   10.60    4.40
  -4  21   0    5.90    4.20
  -5 -21   0   -2.10    3.80
   5 -21   0    1.30    3.90
   5  21   0    4.10    4.60
  -5  21   0   -5.10    4.70
  -6 -21   0    6.50    4.80
   6 -21   0   17.80    4.70
  -6  21   0   18.40    5.70
   6  21   0    3.80    5.10
   0  22   0   15.60    4.70
   1 -22   0  222.88   23.70
   1  22   0  276.67   24.70
  -1  22   0  203.78   24.40
   2 -22   0   33.70    5.50
   2  22   0   36.50    6.60
  -2  22   0   41.00    6.40
   3 -22   0  194.78   19.50
   3  22   0  186.38   20.40
  -3  22   0  172.48   20.00
   4 -22   0   19.20    4.80
  -4  22   0   22.20    5.80
   4  22   0   23.10    5.50
   0  23   0    0.20    4.60
   1  23   0    5.00    4.70
  -1  23   0   10.00    4.50
   2 -23   0    2.20    4.10
   2  23   0   -0.80    4.80
   3 -23   0    2.00    4.10
 -12   0   1   -3.10    3.70
  12   0  -1   -5.90    3.70
  11   0  -1  173.18   17.60
 -11   0   1  157.78   17.30
  10   0  -1   -1.70    2.00
 -10   0   1   -1.30    2.50
  10   0  -1    2.00    2.80
  -9   0   1  228.88   24.20
   9   0  -1  223.18   23.90
   9   0  -1  274.57   24.20
  -8   0   1   -1.50    1.60
   8   0  -1    0.20    1.20
   8   0  -1    1.20    1.40
   7   0  -1 1083.99  103.89
   7   0  -1  992.80  103.99
   7   0  -1 1138.79  103.89
  -6   0   1    0.10    1.20
   6   0  -1   -0.20    1.10
   6   0  -1    0.00    0.90
  -5   0   1 1429.06  123.69
   5   0  -1 1301.57  123.69
  -5   0   1 1298.57  123.69
   5   0  -1 1081.39  123.59
   5   0  -1 1280.07  123.69
   4   0  -1    0.00    0.60
  -4   0   1    0.20    0.50
  -4   0   1    0.40    0.70
   4   0  -1   -0.10    0.60
  -4   0   1    0.70    0.80
   4   0  -1    0.30    0.70
   3   0  -1 1010.60   97.79
  -3   0   1  960.90   97.79
  -3   0   1  955.80   97.79
   3   0  -1 1118.39   97.79
   2   0  -1    0.10    0.30
  -2   0   1    1.20    0.40
  -2   0   1    0.40    0.30
   2   0  -1    0.20    0.30
  -2   0   1    0.40    0.30
   2   0  -1    0.00    0.30
   1   0  -1 1509.05  143.19
  -1   0   1 1464.45  143.29
  -1   0   1 1471.05  143.19
  -1   0  -1 5537.85  539.35
  -1   0  -1 5482.75  539.45
   1   0   1 5524.75  539.45
   1   0   1 5786.22  539.45
  -2   0  -1    0.00    0.40
   2   0   1    0.60    0.20
  -2   0  -1    0.10    0.10
   2   0   1    0.20    0.30
  -2   0  -1    0.30    0.30
   2   0   1   -0.30    0.40
   3   0   1  197.58   21.20
   3   0   1  236.38   21.10
   3   0   1  238.08   21.00
  -3   0  -1  198.18   21.10
  -3   0  -1  208.18   21.20
  -4   0  -1    0.70    0.60
   4   0   1    1.70    0.90
   4   0   1    0.30    0.50
  -5   0  -1  711.93   65.29
   5   0   1  703.63   64.99
   5   0   1  599.34   64.99
   5   0   1  673.43   65.19
   6   0   1    1.10    0.80
   6   0   1   -0.60    0.80
  -6   0  -1    0.10    1.30
   6   0   1    1.20    0.70
   7   0   1  137.69   14.50
  -7   0  -1  145.79   15.00
   7   0   1  165.58   14.90
   7   0   1  142.49   14.50
   8   0   1    2.20    1.50
  -8   0  -1   -0.70    1.70
   8   0   1    0.50    1.10
   8   0   1   -0.90    1.50
  -9   0  -1   38.10    6.00
   9   0   1   51.09    5.90
  10   0   1   -3.70    2.20
 -10   0  -1    1.70    2.70
  11   0   1   -2.20    3.10
 -11   0  -1   -4.80    2.90
 -12   0  -1   -2.00    3.90
  12   0   1    3.80    3.90
  12  -1  -1   -1.40    3.80
 -12  -1   1    3.40    4.00
 -12   1   1    0.80    3.60
  12   1  -1    6.10    4.00
  11  -1  -1   22.00    4.30
 -11  -1   1   17.80    4.00
 -11   1   1   21.20    4.10
  11   1  -1   25.40    4.40
  10  -1  -1   12.20    2.80
 -10  -1   1   12.80    3.00
  10  -1  -1   18.10    3.30
  10   1  -1   14.50    2.80
   9  -1  -1   48.90    5.20
   9  -1  -1   30.20    4.70
  -9  -1   1   37.90    5.40
   9   1  -1   36.00    4.70
  -9   1   1   36.60    5.10
   8  -1  -1    1.90    1.50
   8  -1  -1    1.30    1.20
  -8  -1   1    0.20    1.70
  -8   1   1    0.50    1.60
   8   1  -1    1.00    1.20
   8   1  -1    2.90    1.50
   7  -1  -1   84.49    9.10
   7  -1  -1   88.69    9.10
  -7   1   1   76.59    9.10
   7   1  -1   82.99    9.00
   7   1  -1   95.99    9.10
   7   1  -1   93.39    9.00
  -6  -1   1   28.80    3.50
   6  -1  -1   25.80    3.20
   6  -1  -1   24.50    3.30
  -6   1   1   25.00    3.10
  -6   1   1   34.70    3.60
   6   1  -1   28.30    3.20
   6   1  -1   20.40    3.20
  -5  -1   1  188.98   17.40
   5  -1  -1  167.58   17.20
   5   1  -1  172.98   17.40
  -5   1   1  177.98   17.20
   5   1  -1  168.48   17.20
  -5   1   1  188.28   17.30
   5   1  -1  145.89   17.10
   5   1  -1  178.28   17.20
  -5   1   1  188.78   17.30
  -4  -1   1  105.99   10.90
   4  -1  -1  115.89   11.00
   4  -1  -1  105.89   11.00
   4  -1  -1  101.29   11.00
   4   1  -1  112.79   11.00
   4   1  -1  113.19   11.00
  -4   1   1  100.09   11.00
   4   1  -1  129.39   11.00
  -3  -1   1 1011.70  101.59
   3  -1  -1 1019.40  101.59
  -3  -1   1 1126.29  101.49
   3  -1  -1 1079.79  101.59
   3  -1  -1 1035.30  101.59
   3   1  -1  960.90  101.49
  -3   1   1  977.10  101.49
   3   1  -1 1156.68  101.59
  -3   1   1 1083.69  101.59
   2  -1  -1   22.60    2.20
  -2  -1   1   22.80    2.20
  -2  -1   1   20.90    2.20
   2  -1  -1   19.20    2.20
   2  -1  -1   22.30    2.20
   2   1  -1   22.80    2.20
   2   1  -1   19.80    2.20
  -2   1   1   19.40    2.20
  -2   1   1   19.90    2.20
   2   1  -1   20.50    2.20
  -2   1   1   20.60    2.20
  -1  -1   1  535.95   52.59
   1  -1  -1  550.84   52.69
   1  -1  -1  490.25   52.59
   1  -1  -1  580.44   52.69
  -1   1   1  495.85   52.69
  -1   1   1  596.14   52.69
   1   1  -1  550.54   52.59
   1   1  -1  542.25   52.69
  -1   1   1  559.54   52.59
  -1  -1  -1 1762.12  207.88
  -1  -1  -1 2223.38  207.98
   1  -1   1 2331.37  208.08
   1   1   1 2174.18  208.18
  -1   1  -1 2244.08  207.98
   1   1   1 2186.78  207.98
   2  -1   1   80.39    7.20
  -2  -1  -1   72.19    7.30
  -2  -1  -1   79.09    7.40
   2  -1   1   74.39    7.30
   2  -1   1   65.79    7.30
  -2   1  -1   64.49    7.30
   2   1   1   73.69    7.30
  -2   1  -1   81.59    7.40
  -2   1  -1   65.29    7.20
   2   1   1   75.79    7.40
   2   1   1   80.49    7.20
   3  -1   1 3515.75  332.07
  -3  -1  -1 3427.66  331.67
  -3   1  -1 3410.16  331.77
   3   1   1 3586.94  331.77
   3   1   1 3464.25  331.67
  -3   1  -1 3445.76  331.67
   3   1   1 3186.48  331.57
   4  -1   1    1.00    1.00
   4  -1   1    3.00    0.60
  -4  -1  -1    2.10    0.80
   4   1   1    2.60    0.80
  -4   1  -1    1.30    0.70
   4   1   1    3.30    0.60
   4   1   1    2.40    1.00
  -4   1  -1    1.80    0.50
   4   1   1    2.70    0.60
  -5  -1  -1  812.32   81.89
   5  -1   1  912.51   82.09
  -5  -1  -1  882.91   81.99
   5  -1   1  887.81   81.69
   5   1   1  778.22   81.69
  -5   1  -1  724.23   81.69
  -5   1  -1  884.21   81.99
   5   1   1  881.31   81.69
   5   1   1  845.62   81.89
   6  -1   1   61.99    6.20
  -6  -1  -1   66.49    6.60
   6  -1   1   52.09    6.00
   6   1   1   52.39    6.20
   6   1   1   69.99    6.00
   6   1   1   48.90    5.90
  -6   1  -1   61.19    6.40
   7  -1   1  522.45   45.30
   7  -1   1  428.36   44.90
   7  -1   1  404.56   44.90
   7   1   1  428.86   44.90
   7   1   1  545.15   45.30
  -7   1  -1  503.35   45.40
   7   1   1  423.76   44.90
   8  -1   1   40.00    4.30
   8  -1   1   38.50    4.50
  -8  -1  -1   34.70    4.70
  -8   1  -1   27.10    4.30
   8   1   1   25.50    3.80
   8   1   1   37.50    4.50
  -9  -1  -1  301.17   32.10
   9  -1   1  388.86   32.20
  -9   1  -1  279.87   32.00
  10  -1   1   28.70    4.40
 -10  -1  -1   17.60    3.80
  10   1   1   24.50    4.10
 -10   1  -1   23.80    4.20
 -11  -1  -1  158.38   17.10
  11  -1   1  160.28   17.00
  11   1   1  164.38   17.00
 -11   1  -1  156.08   17.00
 -12  -1  -1   12.80    4.30
  12  -1   1    2.30    4.20
  12   1   1    7.00    4.30
 -12   1  -1    7.50    4.00
  12  -2  -1   56.49    8.00
 -12  -2   1   61.99    8.90
  12   2  -1   52.59    7.80
 -12   2   1   65.09    8.50
 -11  -2   1  100.19   10.90
  11  -2  -1   86.29   10.80
  11   2  -1   90.89   10.90
 -11   2   1   91.29   10.60
  10  -2  -1  123.79   11.60
 -10  -2   1   97.19   11.50
  10  -2  -1  101.39   11.10
  10   2  -1  104.49   11.10
 -10   2   1   97.39   11.40
  10   2  -1  103.79   11.50
  -9  -2   1  150.48   16.30
   9  -2  -1  160.28   16.00
   9   2  -1  184.08   16.30
  -9   2   1  142.29   16.20
   9   2  -1  153.78   15.90
   8  -2  -1  168.38   14.80
  -8  -2   1  116.09   14.80
   8   2  -1  172.78   14.80
  -8   2   1  129.89   14.70
   8   2  -1  137.89   14.50
   7  -2  -1  293.47   29.40
  -7  -2   1  338.07   29.50
   7   2  -1  290.87   29.20
  -7   2   1  242.18   29.30
   7   2  -1  318.37   29.30
   7   2  -1  306.87   29.20
  -6  -2   1   80.89    9.10
   6  -2  -1   80.59    9.00
   6  -2  -1   89.49    9.00
  -6   2   1   89.89    8.90
   6   2  -1   86.49    8.90
   6   2  -1   84.69    8.90
  -6   2   1  101.19    9.10
   5  -2  -1  195.58   15.70
  -5  -2   1  149.99   15.60
   5  -2  -1  142.79   15.60
   5   2  -1  154.58   15.60
  -5   2   1  149.79   15.60
   4  -2  -1  450.15   48.50
   4  -2  -1  486.75   48.60
  -4  -2   1  494.95   48.50
   4   2  -1  567.84   48.60
   4   2  -1  549.15   48.50
  -4   2   1  437.66   48.60
  -4   2   1  528.75   48.60
   4   2  -1  486.15   48.50
  -3  -2   1  429.06   39.10
   3  -2  -1  405.16   39.10
   3  -2  -1  402.26   39.00
  -3  -2   1  414.96   39.00
   3  -2  -1  395.96   39.10
  -3   2   1  385.76   39.00
   3   2  -1  412.46   39.00
   3   2  -1  360.16   39.10
  -3   2   1  357.56   39.10
   3   2  -1  417.16   39.00
   3   2  -1  458.95   39.10
  -3   2   1  387.96   39.00
   2  -2  -1  694.13   65.89
  -2  -2   1  748.83   65.89
  -2  -2   1  681.33   65.89
   2  -2  -1  659.93   65.79
   2  -2  -1  655.03   65.89
  -2   2   1  639.84   65.89
   2   2  -1  721.83   65.89
  -2   2   1  751.82   65.79
   2   2  -1  573.74   65.79
  -1  -2   1    5.90    0.80
   1  -2  -1    5.40    0.80
  -1  -2   1    5.50    0.70
  -1  -2   1    5.00    0.60
   1  -2  -1    5.40    0.60
  -1   2   1    5.00    0.80
  -1   2   1    6.10    0.60
   1   2  -1    5.20    0.70
   1   2  -1    3.30    0.70
  -1   2   1    5.60    0.80
   0  -2   1  846.62   80.99
   0  -2  -1  932.81   81.09
   0  -2  -1  780.02   80.99
   0  -2  -1  956.10   80.99
   0  -2   1  905.61   80.99
   0   2  -1  853.21   80.99
   0   2  -1  864.11   80.99
   0   2   1  745.33   80.99
   0   2  -1  778.92   80.99
   0   2   1  722.63   80.89
  -1  -2  -1   69.59    6.90
  -1  -2  -1   73.99    7.00
  -1  -2  -1   60.49    6.90
   1  -2   1   74.39    6.90
   1   2   1   72.69    7.00
  -1   2  -1   77.09    7.00
   1   2   1   73.29    7.00
  -1   2  -1   62.09    6.90
  -1   2  -1   73.59    6.90
   1   2   1   72.39    6.90
   2  -2   1  159.48   14.30
  -2  -2  -1  146.19   14.30
   2  -2   1  151.18   14.30
   2  -2   1  144.99   14.20
  -2  -2  -1  128.69   14.30
  -2  -2  -1  158.38   14.20
   2   2   1  135.59   14.30
   2   2   1  146.99   14.20
  -2   2  -1  155.38   14.30
   2   2   1  135.29   14.30
   3  -2   1  195.28   20.50
   3  -2   1  248.68   20.40
  -3  -2  -1  187.18   20.40
   3  -2   1  179.28   20.40
  -3  -2  -1  196.68   20.50
   3   2   1  238.78   20.50
  -3   2  -1  230.08   20.40
   3   2   1  196.08   20.50
   4  -2   1    8.50    1.60
  -4  -2  -1    8.10    1.40
   4  -2   1    9.40    1.30
  -4  -2  -1   10.00    1.60
   4  -2   1   11.50    1.50
   4   2   1    9.60    1.20
  -4   2  -1    8.70    1.10
  -4   2  -1    5.30    1.20
   4   2   1    7.20    1.10
   4   2   1    6.60    1.50
   5  -2   1  173.88   17.10
  -5  -2  -1  185.08   17.30
  -5  -2  -1  176.98   17.10
   5  -2   1  148.49   17.20
   5  -2   1  174.78   16.90
   5   2   1  174.38   16.90
   5   2   1  182.98   16.90
   5   2   1  171.28   17.10
  -5   2  -1  168.68   16.90
  -5   2  -1  169.08   17.20
   6  -2   1  101.39   11.30
  -6  -2  -1  126.19   11.60
   6  -2   1   92.19   11.10
   6   2   1   98.79   11.10
  -6   2  -1  108.09   11.40
   6   2   1  130.19   11.10
  -6   2  -1  125.09   11.10
   6   2   1  117.29   11.40
  -7  -2  -1   41.50    4.40
   7  -2   1   29.90    3.70
   7  -2   1   34.80    3.90
   7   2   1   29.50    3.80
   7   2   1   26.90    3.50
  -7   2  -1   27.40    4.00
   7   2   1   28.80    3.60
  -8  -2  -1   27.20    4.30
   8  -2   1   35.40    4.20
   8   2   1   28.10    3.60
  -8   2  -1   30.80    4.20
   8   2   1   31.10    4.20
   9  -2   1   56.99    6.60
  -9  -2  -1   50.99    6.80
   9  -2   1   49.60    5.90
  -9   2  -1   52.69    6.70
   9   2   1   61.29    6.60
 -10  -2  -1   -1.70    2.30
  10  -2   1    1.70    2.60
  10   2   1   -1.20    2.30
 -10   2  -1   -1.40    2.30
 -11  -2  -1   24.00    4.70
  11  -2   1   27.10    5.00
  11   2   1   26.60    4.70
 -11   2  -1   30.20    4.90
 -12  -2  -1    1.20    3.70
  12  -2   1    0.20    4.00
  12   2   1    3.00    4.20
 -12   2  -1    0.80    3.90
  12  -3  -1   18.20    4.90
 -12  -3   1   17.80    5.10
  12   3  -1   19.70    4.90
 -12   3   1   18.70    4.70
  11  -3  -1    6.90    3.20
 -11  -3   1    0.00    3.20
 -11   3   1    1.50    2.90
  11   3  -1    6.10    3.20
  10  -3  -1   84.69    9.20
 -10  -3   1   75.29    9.30
 -10   3   1   76.99    9.00
  10   3  -1   77.39    9.00
  10   3  -1   78.29    8.80
   9  -3  -1   66.09    7.70
  -9  -3   1   54.39    7.80
  -9   3   1   59.99    7.70
   9   3  -1   84.89    7.80
   9   3  -1   67.39    7.40
  -8  -3   1   78.89    9.90
   8  -3  -1   84.69    9.80
   8   3  -1  100.69    9.80
  -8   3   1   78.69    9.70
   8   3  -1   97.29    9.60
  -8   3   1  111.79    9.70
   7  -3  -1  163.98   15.90
  -7  -3   1  136.59   15.90
  -7   3   1  153.78   15.70
   7   3  -1  185.28   15.80
  -7   3   1  145.89   15.80
   6  -3  -1  372.16   37.10
   6  -3  -1  375.66   37.00
  -6  -3   1  385.16   37.20
   6   3  -1  415.56   37.00
  -6   3   1  344.27   36.90
  -6   3   1  369.06   37.00
   6   3  -1  391.26   37.00
  -5  -3   1  196.88   20.30
   5  -3  -1  208.88   20.40
   5  -3  -1  206.88   20.50
   5   3  -1  217.98   20.40
   4  -3  -1  785.92   76.49
  -4  -3   1  785.02   76.39
   4  -3  -1  753.82   76.49
   4  -3  -1  795.22   76.49
  -4   3   1  691.73   76.49
  -4   3   1  887.81   76.49
   4   3  -1  868.21   76.49
   4   3  -1  766.22   76.39
   4   3  -1  768.62   76.39
   3  -3  -1  376.86   38.90
  -3  -3   1  411.96   38.90
  -3  -3   1  346.97   38.80
  -3  -3   1  438.96   38.80
   3  -3  -1  446.16   38.90
   3   3  -1  415.56   38.80
   3   3  -1  360.76   38.80
  -3   3   1  404.66   38.90
   2  -3  -1 3400.16  354.66
  -2  -3   1 3819.72  354.86
  -2  -3   1 3626.54  354.46
   2  -3  -1 3799.52  354.96
   2  -3  -1 3585.54  354.26
  -2  -3   1 3870.21  354.66
   2   3  -1 3672.43  354.76
  -2   3   1 3623.94  354.46
   2   3  -1 3622.84  354.46
   1  -3  -1 5171.08  480.15
  -1  -3   1 4891.01  480.05
  -1  -3   1 4196.38  480.05
   1  -3  -1 5088.89  480.45
  -1  -3   1 5405.26  479.75
   1   3  -1 5144.19  480.25
  -1   3   1 4265.57  479.65
   1   3  -1 5508.75  479.75
  -1   3   1 4517.35  480.15
  -1   3   1 5784.62  480.45
   1   3  -1 5306.27  480.05
  -1   3   1 4361.06  479.55
   0  -3   1  650.53   60.29
   0  -3  -1  625.74   60.29
   0  -3  -1  610.54   60.19
   0  -3   1  688.83   60.19
   0  -3   1  559.94   60.19
   0   3  -1  588.54   60.19
   0   3  -1  635.34   60.19
   0   3   1  650.93   60.29
   0   3   1  691.83   60.19
   0   3  -1  527.65   60.19
  -1  -3  -1 1597.34  144.79
  -1  -3  -1 1505.65  144.79
  -1  -3  -1 1410.36  144.79
   1  -3   1 1477.85  144.79
   1  -3   1 1430.86  144.79
   1  -3   1 1512.85  144.79
   1   3   1 1573.24  144.89
  -1   3  -1 1517.45  144.79
  -1   3  -1 1470.75  144.79
   1   3   1 1497.45  144.79
  -1   3  -1 1527.75  144.79
   1   3   1 1464.15  144.79
   2  -3   1 1897.11  165.48
  -2  -3  -1 1590.44  165.48
   2  -3   1 1769.22  165.48
  -2  -3  -1 1794.12  165.38
  -2   3  -1 1794.42  165.48
  -2   3  -1 1720.83  165.38
  -2   3  -1 1838.02  165.48
   2   3   1 1639.84  165.38
   2   3   1 1490.35  165.48
   2   3   1 1590.84  165.38
   3  -3   1  150.98   13.40
  -3  -3  -1  143.59   13.50
   3  -3   1  149.09   13.50
  -3  -3  -1  150.98   13.30
  -3  -3  -1  114.09   13.30
   3  -3   1  122.19   13.40
   3   3   1  119.69   13.50
  -3   3  -1  118.69   13.40
  -3   3  -1  139.49   13.30
   3   3   1  149.49   13.30
   4  -3   1 1044.90  102.89
  -4  -3  -1 1062.69  102.89
   4  -3   1 1059.89  102.69
  -4   3  -1 1050.39  102.79
   4   3   1 1112.19  102.99
   4   3   1 1098.89  102.69
  -4   3  -1 1006.60  102.69
   5  -3   1  279.37   25.80
  -5  -3  -1  268.97   25.80
   5  -3   1  274.17   25.80
  -5  -3  -1  282.57   25.70
   5  -3   1  226.08   25.50
   5   3   1  237.98   25.50
   5   3   1  293.37   25.50
   5   3   1  276.57   25.70
  -5   3  -1  231.58   25.70
  -5   3  -1  250.97   25.50
   6  -3   1  765.92   87.49
   6  -3   1  911.21   87.79
  -6  -3  -1  987.30   87.89
  -6   3  -1  945.51   87.49
   6   3   1  971.40   87.49
  -6   3  -1  974.50   87.89
   6   3   1  821.82   87.49
   6   3   1  862.81   87.69
   7  -3   1  153.08   16.90
  -7  -3  -1  165.18   17.30
   7  -3   1  207.18   17.30
   7   3   1  168.68   16.80
   7   3   1  155.98   16.80
  -7   3  -1  182.68   17.20
  -8  -3  -1  156.08   16.90
   8  -3   1  168.18   16.80
  -8   3  -1  168.88   16.90
   8   3   1  166.58   16.70
   9  -3   1   55.99    6.20
   9  -3   1   49.40    5.50
  -9  -3  -1   45.30    6.70
  -9   3  -1   40.40    6.00
   9   3   1   43.10    5.80
  10  -3   1  217.48   21.50
 -10  -3  -1  169.08   21.40
 -10   3  -1  240.98   21.60
  10   3   1  212.38   21.40
  11  -3   1   31.30    5.70
 -11  -3  -1   34.00    5.60
 -11   3  -1   35.40    5.60
  11   3   1   48.60    6.60
  12  -3   1  137.69   14.20
 -12  -3  -1  122.09   13.90
  12   3   1   98.69   14.00
 -12   3  -1  120.19   13.80
 -12  -4   1   81.19   11.20
  12  -4  -1   90.49   11.20
  12   4  -1   84.39   11.50
 -12   4   1   94.19   10.80
 -11  -4   1    2.20    3.30
  11  -4  -1    3.20    3.10
 -11   4   1    1.70    3.00
  11   4  -1    3.00    3.00
 -10  -4   1  201.48   21.70
 -10   4   1  214.18   21.60
  10   4  -1  211.38   21.30
  10   4  -1  221.48   21.60
  -9  -4   1    1.10    2.30
   9  -4  -1    0.40    1.90
  -9   4   1    2.80    2.00
   9   4  -1    1.00    1.70
   9   4  -1    1.90    1.80
  -9   4   1    1.70    1.70
  -8  -4   1  324.17   34.40
   8  -4  -1  357.56   34.40
  -8   4   1  395.86   34.20
  -8   4   1  328.87   34.20
   8   4  -1  325.77   34.10
   8   4  -1  350.96   34.10
   7  -4  -1    7.90    1.80
  -7  -4   1    8.10    2.00
   7   4  -1    4.90    1.40
  -7   4   1    6.30    1.50
  -7   4   1    7.70    1.80
   7   4  -1    3.80    1.40
  -6  -4   1  652.53   62.39
   6  -4  -1  649.24   62.29
   6  -4  -1  631.24   62.19
  -6  -4   1  693.03   62.39
   6   4  -1  711.03   62.29
  -6   4   1  548.95   62.19
  -6   4   1  587.74   62.19
   6   4  -1  631.44   62.19
   6   4  -1  661.43   62.19
  -5  -4   1    3.90    1.40
   5  -4  -1    2.90    1.10
   5  -4  -1    1.80    1.20
   5  -4  -1    3.10    1.10
  -5  -4   1    1.90    0.90
  -5   4   1    0.70    0.80
   5   4  -1    2.40    1.00
   4  -4  -1 1484.95  160.28
   4  -4  -1 1694.73  160.28
  -4  -4   1 1686.93  160.38
  -4   4   1 1755.22  160.38
   4   4  -1 1616.94  160.38
   4   4  -1 1635.14  160.18
   4   4  -1 1720.93  160.28
  -4   4   1 1626.34  160.28
  -4   4   1 1697.43  160.28
   3  -4  -1  165.68   14.50
  -3  -4   1  128.59   14.50
   3  -4  -1  129.39   14.50
  -3  -4   1  156.58   14.40
   3  -4  -1  145.89   14.60
  -3   4   1  153.08   14.60
  -3   4   1  164.18   14.50
   3   4  -1  144.39   14.40
   3   4  -1  138.49   14.50
  -2  -4   1 4639.94  420.36
  -2   4   1 4545.75  420.36
   2   4  -1 3780.42  419.56
   2   4  -1 4431.66  419.86
  -1  -4   1  395.46   36.10
  -1  -4   1  391.46   36.00
   1  -4  -1  407.56   36.00
   1   4  -1  350.66   36.10
  -1   4   1  383.36   36.00
   1   4  -1  354.96   36.10
  -1   4   1  385.56   36.20
  -1   4   1  308.87   36.10
   0  -4  -1 3106.29  308.37
   0  -4  -1 3385.66  308.77
   0  -4   1 3521.95  308.57
   0  -4   1 3349.17  308.67
   0   4  -1 3412.06  308.57
   0   4  -1 3282.67  308.77
   0   4   1 2892.81  308.37
   0   4   1 2598.24  308.37
  -1  -4  -1  302.37   29.30
   1  -4   1  263.47   29.30
   1  -4   1  304.07   29.30
   1  -4   1  294.97   29.30
  -1  -4  -1  330.47   29.40
  -1  -4  -1  299.87   29.30
  -1   4  -1  303.37   29.30
   1   4   1  305.77   29.30
   1   4   1  288.57   29.30
  -1   4  -1  312.97   29.30
   1   4   1  319.07   29.40
   2  -4   1 1603.64  141.79
  -2  -4  -1 1544.25  141.79
   2  -4   1 1578.94  141.89
  -2  -4  -1 1599.04  141.79
  -2  -4  -1 1576.74  141.89
  -2   4  -1 1259.47  141.79
  -2   4  -1 1290.07  141.79
   2   4   1 1478.15  141.79
   2   4   1 1276.37  141.79
   3  -4   1  381.36   41.50
  -3  -4  -1  375.36   41.50
   3   4   1  450.35   41.50
   3   4   1  508.15   41.50
  -3   4  -1  474.65   41.60
   3   4   1  376.76   41.60
   4  -4   1  539.85   46.80
  -4  -4  -1  514.15   46.60
   4  -4   1  435.86   46.60
  -4  -4  -1  524.95   46.90
   4   4   1  407.66   46.60
  -4   4  -1  485.65   46.80
  -4   4  -1  505.65   46.90
   4   4   1  458.75   46.80
  -4   4  -1  436.86   46.60
   4   4   1  507.65   46.90
   5  -4   1   12.10    1.90
  -5  -4  -1   14.90    2.10
  -5  -4  -1   15.40    2.30
   5  -4   1   13.20    2.20
   5  -4   1   12.10    2.00
   5   4   1   12.50    1.80
  -5   4  -1   15.20    1.90
  -5   4  -1   12.80    2.10
   5   4   1   16.70    2.10
  -6  -4  -1  293.77   26.10
   6  -4   1  285.27   26.00
  -6   4  -1  222.48   25.80
   6   4   1  257.27   25.70
   6   4   1  276.07   25.80
   6   4   1  245.88   25.60
   7  -4   1    1.40    1.40
  -7  -4  -1   -1.70    1.40
   7  -4   1   -0.30    1.40
   7   4   1    1.00    1.40
   7   4   1    0.30    1.20
  -7   4  -1    0.70    1.30
  -7   4  -1    0.30    1.00
   8  -4   1   78.39    7.50
  -8  -4  -1   67.69    7.40
   8   4   1   69.79    7.20
  -8   4  -1   48.90    7.10
  -8   4  -1   59.79    6.80
  -9  -4  -1    2.30    2.40
  -9   4  -1    1.20    2.10
   9   4   1    6.40    2.10
   9   4   1    3.30    1.70
 -10  -4  -1   12.90    3.70
  10  -4   1   12.30    3.40
  10   4   1   19.40    3.40
 -10   4  -1   14.10    3.40
 -11  -4  -1   -1.50    3.20
  11  -4   1    2.00    3.10
  11   4   1   -0.50    3.20
 -11   4  -1   -1.30    3.00
  12  -4   1   -2.30    4.40
 -12  -4  -1    0.10    4.50
 -12   4  -1   -6.20    3.70
  12   4   1   -6.80    4.50
 -12  -5   1   21.10    5.60
  12  -5  -1   36.60    5.80
 -12   5   1   28.90    5.40
  12   5  -1   29.40    5.90
  11  -5  -1   12.40    3.60
 -11  -5   1    9.80    3.80
  11   5  -1    6.40    3.60
 -11   5   1    9.00    3.40
  10  -5  -1   81.49    9.20
 -10  -5   1   75.29    9.30
 -10   5   1   73.99    8.90
  10   5  -1   90.09    9.20
  10   5  -1   74.09    8.90
  -9  -5   1   33.70    5.10
  -9   5   1   33.90    4.90
   9   5  -1   40.60    5.10
  -9   5   1   32.40    4.90
   9   5  -1   49.80    5.30
  -8  -5   1   82.89    9.90
   8  -5  -1   92.09    9.80
   8   5  -1   97.49    9.60
   8   5  -1   91.89    9.50
  -8   5   1   88.59    9.70
  -7  -5   1   76.29    9.10
   7  -5  -1  102.89    9.20
  -7   5   1   76.09    8.90
  -7   5   1   96.89    8.90
   7   5  -1   75.09    8.80
   7   5  -1   87.49    8.80
   6  -5  -1  472.55   47.30
  -6  -5   1  474.45   47.10
   6  -5  -1  441.96   47.20
  -6   5   1  444.86   47.10
  -6   5   1  536.95   47.20
   6   5  -1  521.85   47.20
   6   5  -1  514.65   47.30
   6   5  -1  468.05   47.10
  -5  -5   1   92.39   10.20
   5  -5  -1  111.99   10.30
   5  -5  -1  102.89   10.20
  -5   5   1  104.39   10.10
  -5   5   1   91.79   10.10
   5   5  -1   98.79   10.10
   4  -5  -1  700.43   63.39
  -4  -5   1  577.94   63.09
  -4  -5   1  681.13   63.29
  -3  -5   1  397.36   37.30
   3  -5  -1  364.46   37.30
   3   5  -1  346.67   37.10
  -3   5   1  454.95   37.40
  -3   5   1  356.26   37.30
  -2  -5   1 1427.16  127.99
   2  -5  -1 1179.58  127.99
   2  -5  -1 1424.56  127.99
  -2  -5   1 1373.16  127.79
  -2  -5   1 1134.09  127.89
  -2   5   1 1427.96  127.99
  -2   5   1 1381.76  127.79
  -2   5   1 1422.86  127.79
  -2   5   1 1211.98  127.99
   2   5  -1 1343.37  127.79
   2   5  -1 1135.09  127.89
   2   5  -1 1416.06  127.99
  -1  -5   1   76.09    8.30
  -1  -5   1   89.99    8.20
  -1  -5   1   95.39    8.10
   1  -5  -1   90.79    8.30
   1  -5  -1   87.19    8.10
   1   5  -1   72.59    8.20
  -1   5   1   90.49    8.10
  -1   5   1   69.29    8.20
   1   5  -1   71.79    8.20
   0  -5  -1  454.65   46.40
   0  -5  -1  462.85   46.30
   0  -5   1  500.15   46.30
   0   5  -1  476.75   46.40
   0   5  -1  504.55   46.30
   0   5   1  469.25   46.40
   0   5  -1  482.05   46.40
   1  -5   1    6.90    0.90
  -1  -5  -1    4.90    0.90
   1  -5   1    5.60    1.00
  -1  -5  -1    5.20    0.90
  -1  -5  -1    5.80    0.90
   1  -5   1    7.50    1.00
  -1   5  -1    7.20    1.00
  -1   5  -1    7.10    1.00
  -1   5  -1    8.30    1.00
   1   5   1    7.70    1.00
   1   5   1    9.20    1.10
   1   5   1    6.60    1.00
   2  -5   1  945.41  104.49
   2  -5   1 1185.38  104.59
  -2  -5  -1  895.11  104.49
  -2  -5  -1 1172.48  104.49
  -2   5  -1 1129.99  104.49
   2   5   1 1145.29  104.49
  -2   5  -1  969.10  104.49
  -2   5  -1 1130.19  104.49
   2   5   1 1027.20  104.59
   2   5   1 1208.08  104.59
   3  -5   1  225.08   22.70
  -3  -5  -1  209.58   22.60
   3   5   1  262.87   22.70
  -3   5  -1  213.88   22.70
  -3   5  -1  234.58   22.60
   3   5   1  247.38   22.70
   4  -5   1 1505.15  161.48
  -4  -5  -1 1670.03  161.58
   4  -5   1 1615.24  161.58
  -4  -5  -1 1815.12  161.48
  -4   5  -1 1713.63  161.48
   4   5   1 1701.43  161.48
   5  -5   1  132.39   12.60
  -5  -5  -1  107.99   12.30
  -5  -5  -1  102.39   12.50
  -5  -5  -1  130.19   12.40
   5   5   1  138.59   12.40
  -5   5  -1  129.19   12.60
   5   5   1  131.29   12.40
  -6  -5  -1  846.22   74.69
  -6   5  -1  787.62   74.39
   6   5   1  770.62   74.29
  -6   5  -1  778.12   74.49
   6   5   1  783.42   74.39
   6   5   1  640.44   74.19
   7  -5   1    7.30    1.90
   7  -5   1    8.00    2.10
  -7  -5  -1    7.20    2.20
  -7   5  -1    7.80    2.20
   7   5   1   10.90    2.10
   7   5   1   10.30    1.90
  -7   5  -1   12.60    1.80
  -8  -5  -1  307.27   28.30
   8   5   1  275.27   27.70
  -8   5  -1  270.47   27.70
  -9  -5  -1    8.60    3.10
   9  -5   1   17.30    3.10
  -9   5  -1   10.50    2.20
  -9   5  -1   10.20    2.80
   9   5   1   14.30    2.90
   9   5   1   12.60    2.30
 -10  -5  -1  192.88   20.10
  10  -5   1  203.08   20.10
  10   5   1  203.28   20.00
 -10   5  -1  175.88   19.70
 -11  -5  -1   27.70    5.10
  11  -5   1   29.40    5.10
  11   5   1   29.60    5.00
 -11   5  -1   25.10    4.80
 -12  -5  -1  166.88   17.90
  12  -5   1  192.98   18.50
  12   5   1  130.69   17.80
 -12   5  -1  169.18   17.90
  12  -6  -1  102.79   12.50
 -12  -6   1   89.59   12.20
  11  -6  -1   54.39    8.20
 -11  -6   1   75.09    8.70
  11   6  -1   53.89    8.30
 -11   6   1   62.39    8.10
  10  -6  -1   87.89   10.00
 -10  -6   1   73.49   10.20
 -10   6   1   80.69    9.80
 -10   6   1  104.99    9.80
  10   6  -1   83.29    9.90
   9  -6  -1   54.49    6.90
  -9  -6   1   48.00    7.00
  -9   6   1   49.00    6.50
  -9   6   1   55.79    6.70
   9   6  -1   67.59    6.80
   9   6  -1   55.69    6.50
  -8  -6   1  181.88   20.40
   8  -6  -1  177.38   20.30
  -8   6   1  229.18   20.30
   8   6  -1  215.98   20.20
   8   6  -1  180.68   20.10
  -8   6   1  224.38   20.20
  -7  -6   1   40.30    5.70
   7  -6  -1   43.40    5.60
   7   6  -1   54.79    5.50
   7   6  -1   56.19    5.40
  -7   6   1   42.40    5.40
  -7   6   1   46.20    5.40
  -6  -6   1  606.64   55.99
  -6  -6   1  623.94   56.29
   6  -6  -1  603.74   56.29
   6   6  -1  533.05   56.09
   6   6  -1  519.85   55.99
  -5  -6   1  111.29   13.10
  -5  -6   1  139.29   13.10
   5  -6  -1  109.89   13.00
   5  -6  -1  150.08   13.30
  -5   6   1  148.19   13.20
   5   6  -1  141.09   13.10
  -5   6   1  117.99   13.00
  -4  -6   1  199.78   18.80
  -4  -6   1  175.78   18.90
   4  -6  -1  232.68   19.10
   4   6  -1  190.48   18.90
   4   6  -1  175.88   18.70
  -4   6   1  180.48   19.00
   3  -6  -1  852.51   93.09
  -3  -6   1  940.71   92.89
  -3  -6   1  968.30   93.09
   3   6  -1  906.91   93.09
   3   6  -1  994.80   93.09
   3   6  -1  902.41   92.89
  -3   6   1 1027.50   92.99
  -3   6   1 1032.80   92.89
  -3   6   1 1022.90   93.09
   2  -6  -1  577.14   61.19
  -2  -6   1  585.94   61.09
  -2  -6   1  620.64   61.19
  -2   6   1  617.04   61.09
   2   6  -1  616.84   61.09
  -2   6   1  666.73   61.19
   2   6  -1  582.64   61.09
  -2   6   1  772.22   60.99
  -1  -6   1  448.56   40.20
  -1  -6   1  383.16   40.40
   1  -6  -1  473.55   40.40
   1  -6  -1  361.06   40.40
   1  -6  -1  409.96   40.20
  -1  -6   1  416.36   40.30
  -1   6   1  425.36   40.40
  -1   6   1  364.86   40.30
  -1   6   1  482.35   40.20
   1   6  -1  429.06   40.40
   1   6  -1  371.96   40.30
   0  -6  -1  310.87   30.20
   0  -6   1  281.97   30.40
   0  -6   1  286.47   30.30
   0  -6   1  346.47   30.30
   0  -6  -1  300.37   30.30
   0  -6  -1  259.17   30.30
   0   6   1  330.47   30.20
   0   6  -1  333.07   30.30
   0   6   1  321.87   30.40
   0   6  -1  345.77   30.30
  -1  -6  -1  216.98   21.90
  -1  -6  -1  207.38   21.90
   1  -6   1  245.58   21.90
  -1  -6  -1  206.08   21.90
   1  -6   1  204.18   21.90
   1  -6   1  252.17   21.90
   1   6   1  200.78   21.90
  -1   6  -1  247.28   21.90
  -1   6  -1  212.18   21.90
   1   6   1  254.97   22.00
   2  -6   1  132.79   11.40
  -2  -6  -1  113.19   11.30
   2  -6   1  133.19   11.20
   2  -6   1  107.89   11.30
  -2  -6  -1  124.69   11.30
  -2  -6  -1  110.29   11.30
  -2   6  -1   97.29   11.20
  -2   6  -1  103.99   11.30
   2   6   1  116.19   11.30
   2   6   1  101.39   11.30
  -2   6  -1  119.99   11.30
   2   6   1  110.29   11.30
   3  -6   1  355.96   30.30
   3  -6   1  308.07   30.20
  -3  -6  -1  280.97   30.10
  -3  -6  -1  291.47   30.20
  -3   6  -1  285.67   30.20
   3   6   1  273.97   30.20
  -3   6  -1  316.57   30.10
  -3   6  -1  360.76   30.30
   3   6   1  266.47   30.30
   3   6   1  360.86   30.20
  -4  -6  -1   53.09    6.50
  -4  -6  -1   74.09    6.80
   4  -6   1   61.59    6.70
  -4  -6  -1   60.89    6.60
  -4   6  -1   59.49    6.60
   4   6   1   78.89    6.60
  -5  -6  -1  304.07   28.00
   5  -6   1  235.08   27.90
  -5   6  -1  293.07   27.80
   5   6   1  275.47   27.80
  -5   6  -1  313.07   27.80
  -6  -6  -1  105.49   13.00
   6  -6   1  135.09   13.10
   6  -6   1  140.19   12.90
   6   6   1  126.19   12.80
  -6   6  -1  130.09   13.00
  -7  -6  -1   72.49    7.40
   7  -6   1   63.39    7.20
  -7   6  -1   54.49    7.10
   7   6   1   61.29    6.90
   7   6   1   66.19    7.00
  -7   6  -1   71.09    6.90
  -8  -6  -1   13.60    2.90
   8  -6   1   18.20    3.00
   8   6   1   15.70    2.60
  -8   6  -1   19.10    2.60
  -8   6  -1   11.20    2.70
   8   6   1   14.70    2.40
   9  -6   1   11.00    3.00
  -9  -6  -1   16.30    3.50
   9   6   1   15.00    2.70
  -9   6  -1   15.20    2.60
  -9   6  -1   18.90    3.30
   9   6   1   20.10    3.20
  10  -6   1    8.10    3.10
 -10  -6  -1   11.40    3.50
 -10   6  -1   11.20    3.30
  10   6   1    9.60    3.00
 -11  -6  -1    7.10    3.70
  11  -6   1    7.40    3.40
  11   6   1    5.50    3.40
 -11   6  -1    7.20    3.60
 -12   6  -1    3.40    4.40
  12   6   1    3.80    4.40
 -11  -7   1   35.30    5.80
  11  -7  -1   26.90    5.20
  11   7  -1   31.70    5.20
 -10  -7   1    0.50    3.20
  10  -7  -1    5.00    3.00
 -10   7   1    1.00    2.70
 -10   7   1    4.50    2.50
  10   7  -1    3.10    2.60
  -9  -7   1   43.20    6.10
   9   7  -1   34.50    5.70
  -9   7   1   43.20    5.70
   9   7  -1   46.00    5.70
  -9   7   1   55.39    6.00
  -8  -7   1   23.30    4.10
   8  -7  -1   28.80    4.10
   8   7  -1   30.30    3.70
   8   7  -1   23.80    3.80
  -8   7   1   20.80    3.40
  -8   7   1   24.70    3.40
   7  -7  -1   88.69   10.30
  -7  -7   1   99.49   10.50
   7   7  -1  113.79   10.10
   7   7  -1   89.39   10.10
  -7   7   1   98.69   10.20
   6  -7  -1  245.18   25.70
  -6  -7   1  271.47   25.50
  -6  -7   1  258.47   25.80
  -6   7   1  268.87   25.70
   6   7  -1  270.77   25.70
  -6   7   1  271.07   25.60
   6   7  -1  235.28   25.40
   5  -7  -1  534.65   49.99
  -5  -7   1  540.85   49.99
   5   7  -1  535.15   49.90
  -5   7   1  430.36   49.60
  -5   7   1  524.85   49.90
   4  -7  -1  114.69   13.80
  -4  -7   1  150.38   13.90
  -4  -7   1  147.99   13.80
  -4  -7   1  115.29   13.60
  -4   7   1  123.79   13.50
  -4   7   1  163.48   13.70
   4   7  -1  139.69   13.60
  -4   7   1  151.78   13.90
   4   7  -1  143.99   13.80
  -3  -7   1  349.96   34.80
   3  -7  -1  380.56   34.90
   3  -7  -1  358.26   34.80
  -3  -7   1  297.77   34.70
  -3   7   1  384.06   34.80
  -3   7   1  376.16   34.50
  -3   7   1  390.36   34.60
   3   7  -1  318.47   34.60
   3   7  -1  347.47   34.80
   3   7  -1  354.26   34.80
  -3   7   1  364.26   34.80
   2  -7  -1   57.39    6.50
  -2  -7   1   75.49    6.30
  -2  -7   1   57.49    6.50
  -2   7   1   59.29    6.50
   2   7  -1   60.69    6.50
  -2   7   1   64.49    6.50
   1  -7  -1  986.50   98.29
  -1  -7   1 1089.29   98.39
   1  -7  -1 1071.29   98.49
   1   7  -1  981.30   98.49
  -1   7   1  876.41   98.39
   1   7  -1 1102.49   98.59
   0  -7   1  450.55   39.90
   0  -7  -1  458.65   39.90
   0  -7  -1  391.86   39.80
   0   7  -1  359.06   39.90
   0   7  -1  362.96   39.90
   0   7   1  445.86   39.90
  -1  -7  -1 1148.39  110.29
   1  -7   1 1299.87  110.19
  -1  -7  -1 1293.87  110.29
   1   7   1 1082.69  110.19
  -1   7  -1 1163.48  110.19
   1   7   1  988.40  110.29
  -1   7  -1 1001.50  110.19
  -2  -7  -1  396.86   42.70
  -2  -7  -1  475.95   42.70
   2   7   1  366.06   42.70
  -2   7  -1  398.66   42.60
   2   7   1  474.55   42.80
   2   7   1  487.05   42.70
  -2   7  -1  480.15   42.80
   3  -7   1 1156.28  111.29
  -3  -7  -1 1208.48  111.19
  -3   7  -1 1242.58  111.29
   3   7   1 1053.59  111.19
  -3   7  -1  962.90  111.09
  -3   7  -1 1187.38  111.19
   3   7   1 1236.98  111.29
  -4  -7  -1  136.29   14.40
  -4  -7  -1  184.48   14.70
  -4   7  -1  140.19   14.40
  -4   7  -1  142.79   14.50
   4   7   1  130.79   14.40
   5  -7   1  670.53   64.59
   5  -7   1  633.84   64.59
  -5   7  -1  645.84   64.49
   5   7   1  668.83   64.49
  -5   7  -1  703.23   64.59
  -6  -7  -1  179.88   19.00
   6  -7   1  181.18   19.00
   6   7   1  211.98   18.80
   6   7   1  195.68   18.80
  -6   7  -1  167.38   18.80
  -6   7  -1  202.28   19.00
   7  -7   1  431.56   43.20
  -7  -7  -1  531.45   43.40
   7   7   1  449.56   43.00
  -7   7  -1  415.76   43.00
   7   7   1  378.36   42.80
   8  -7   1  124.49   13.10
  -8  -7  -1  119.29   13.20
   8   7   1  128.99   12.70
  -8   7  -1  134.39   12.70
  -8   7  -1  110.69   12.80
   9  -7   1  147.59   15.80
  -9  -7  -1  141.49   15.90
   9   7   1  151.78   15.50
   9   7   1  176.18   15.80
  -9   7  -1  149.79   15.40
  -9   7  -1  144.09   15.70
  10  -7   1   65.69    8.30
 -10  -7  -1   69.19    8.80
  10   7   1   63.39    8.10
  11  -7   1   77.79   10.40
 -11  -7  -1  101.79   10.80
  11   7   1   80.79   10.40
 -11   7  -1   70.29   10.10
  12   7   1   49.60    7.80
 -11  -8   1  182.28   17.00
  11  -8  -1  129.99   16.40
 -10  -8   1    3.60    3.30
  10  -8  -1    6.30    3.20
  10   8  -1    9.90    3.10
 -10   8   1   10.10    3.00
 -10   8   1    9.50    2.90
   9  -8  -1  124.39   13.50
  -9  -8   1  111.39   13.50
   9   8  -1  125.79   13.20
  -9   8   1  135.29   13.20
   9   8  -1  125.39   13.10
  -9   8   1  126.59   13.10
  -8  -8   1   10.00    3.20
   8  -8  -1   13.30    2.70
  -8   8   1   13.20    2.50
   8   8  -1   11.80    2.60
   8   8  -1   18.70    2.60
  -8   8   1   11.40    2.50
  -7  -8   1  359.26   39.20
   7   8  -1  426.46   39.10
  -7   8   1  379.56   38.90
   7   8  -1  468.55   39.00
  -7   8   1  353.66   39.00
  -6  -8   1   30.40    3.60
   6  -8  -1   23.50    3.50
  -6  -8   1   23.40    3.70
   6   8  -1   24.10    3.50
  -6   8   1   24.90    3.40
   6   8  -1   30.00    3.20
  -6   8   1   23.50    3.60
  -5  -8   1  451.55   39.50
   5  -8  -1  409.96   39.50
   5   8  -1  346.87   39.30
  -5   8   1  434.66   39.50
  -5   8   1  377.76   39.20
   4  -8  -1  195.08   21.00
  -4  -8   1  234.28   21.10
  -4  -8   1  191.08   20.70
   4   8  -1  234.98   21.10
   4   8  -1  207.58   20.80
  -4   8   1  216.98   21.10
  -3  -8   1  928.91   88.79
   3  -8  -1  985.50   88.79
  -3  -8   1  895.61   88.69
  -3   8   1  849.02   88.79
   3   8  -1  939.21   88.79
  -3   8   1  885.81   88.49
   3   8  -1  925.11   88.59
   2  -8  -1  116.89   11.60
  -2  -8   1  112.29   11.60
  -2  -8   1  112.09   11.40
  -2  -8   1  123.19   11.70
  -2  -8   1  108.59   11.40
   2  -8  -1  118.49   11.70
  -2   8   1  118.09   11.40
  -2   8   1  129.69   11.70
   2   8  -1  118.29   11.60
   2   8  -1  107.99   11.60
   1  -8  -1 1054.19   92.69
  -1  -8   1  963.50   92.59
  -1  -8   1 1045.20   92.49
  -1  -8   1  880.01   92.49
  -1  -8   1  826.72   92.59
  -1   8   1 1009.90   92.69
   1   8  -1  916.81   92.69
   0  -8   1    0.20    0.50
   0  -8  -1    0.80    0.60
   0  -8   1    0.90    0.60
   0  -8  -1    0.20    0.50
   0  -8   1   -2.40    0.90
   0  -8  -1   -0.10    0.90
   0   8  -1    0.40    0.60
   0   8   1    0.30    0.80
   0   8  -1    0.30    0.80
   0   8  -1    1.60    0.80
   0   8   1    2.10    0.70
  -1  -8  -1  738.83   76.19
   1  -8   1  878.31   76.29
   1  -8   1  725.33   76.09
   1  -8   1  866.11   76.09
  -1  -8  -1  826.52   76.09
  -1   8  -1  723.03   76.19
  -1   8  -1  737.13   76.09
   1   8   1  852.31   76.29
  -1   8  -1  728.13   76.09
   1   8   1  787.22   76.09
   2  -8   1    4.80    1.10
   2  -8   1    3.80    0.80
  -2  -8  -1    5.70    1.00
  -2  -8  -1    2.40    1.10
   2  -8   1    6.20    1.40
  -2   8  -1    3.50    1.00
  -2   8  -1    5.00    1.20
   2   8   1    4.20    1.10
  -2   8  -1    5.00    0.90
   2   8   1    3.40    1.10
   3  -8   1  330.87   37.60
  -3  -8  -1  381.66   37.60
   3  -8   1  429.96   37.80
   3   8   1  385.66   37.70
  -3   8  -1  420.86   37.60
  -3   8  -1  320.47   37.50
   3   8   1  429.36   37.80
  -3   8  -1  397.46   37.70
   4  -8   1   16.60    2.40
  -4  -8  -1   13.80    2.00
   4  -8   1   11.40    1.90
  -4  -8  -1   13.00    1.90
  -4  -8  -1   11.70    2.00
   4   8   1   10.80    1.70
  -4   8  -1    9.70    1.80
   4   8   1   15.40    2.00
  -4   8  -1   10.60    1.80
   5  -8   1  291.87   29.60
  -5  -8  -1  315.47   29.50
  -5   8  -1  320.67   29.50
   5   8   1  270.17   29.40
  -5   8  -1  288.87   29.50
  -5   8  -1  304.97   29.50
   5   8   1  314.67   29.50
  -6  -8  -1   13.60    2.40
   6  -8   1    6.60    1.80
   6   8   1    8.90    1.70
   6   8   1   10.70    1.90
  -6   8  -1   10.20    1.90
  -6   8  -1    8.00    1.90
   7  -8   1  109.69   12.10
   7   8   1  106.19   11.80
   7   8   1  105.79   11.80
  -7   8  -1  139.59   12.00
  -7   8  -1  118.49   12.00
   8   8   1   15.70    2.80
   8   8   1   18.20    2.90
  -8   8  -1   15.40    2.70
  -8   8  -1   17.70    3.00
   9  -8   1   36.80    5.50
  -9  -8  -1   32.10    5.00
  -9   8  -1   25.80    4.70
  -9   8  -1   44.50    5.10
   9   8   1   32.90    4.70
  10  -8   1   -1.50    3.00
 -10  -8  -1    1.80    2.80
  10   8   1    1.90    2.80
  11  -8   1   12.40    4.00
 -11  -8  -1    7.00    4.20
 -11   8  -1   10.60    4.20
  11   8   1   12.50    4.10
 -11  -9   1   15.20    4.70
  11  -9  -1   24.10    4.60
  10  -9  -1   54.49    8.60
 -10  -9   1   61.59    8.80
  10   9  -1   77.29    8.50
 -10   9   1   71.79    8.50
  -9  -9   1   25.70    4.50
   9  -9  -1   22.40    4.10
  -9   9   1   21.10    3.70
   9   9  -1   21.30    3.90
   9   9  -1   24.50    3.70
  -9   9   1   24.70    4.00
   8  -9  -1   16.70    3.10
  -8  -9   1   14.40    3.40
  -8   9   1   19.10    2.80
   8   9  -1   16.90    3.10
   8   9  -1   14.40    2.60
  -8   9   1   20.00    3.20
   7  -9  -1  148.69   13.70
  -7   9   1  121.49   13.20
  -7   9   1  112.69   13.40
   7   9  -1  142.59   13.20
   6  -9  -1   70.49    7.20
  -6  -9   1   49.50    7.00
  -6   9   1   72.49    7.20
   6   9  -1   55.09    6.90
   6   9  -1   65.59    6.60
  -6   9   1   76.09    6.80
  -6   9   1   56.09    6.70
  -5  -9   1  484.35   44.50
   5  -9  -1  508.35   44.60
   5   9  -1  443.26   44.40
  -5   9   1  423.86   44.10
  -5   9   1  490.05   44.50
  -5   9   1  387.76   44.20
  -4  -9   1  241.18   22.60
   4  -9  -1  250.97   22.70
  -4  -9   1  195.58   22.30
   4   9  -1  224.88   22.60
   4   9  -1  244.18   22.30
  -4   9   1  212.18   22.30
  -4   9   1  237.48   22.70
  -3  -9   1  586.04   54.89
  -3  -9   1  475.75   54.59
  -3   9   1  568.14   54.89
   3   9  -1  611.04   54.89
  -3   9   1  584.24   54.69
  -2  -9   1  236.38   22.60
   2  -9  -1  239.88   22.70
   2  -9  -1  235.88   22.40
  -2  -9   1  207.18   22.40
  -2  -9   1  216.08   22.50
   2   9  -1  252.87   22.70
   2   9  -1  229.88   22.70
  -2   9   1  227.28   22.70
  -1  -9   1  981.50  107.29
   1  -9  -1 1131.09  107.39
   1  -9  -1  992.00  107.19
  -1  -9   1 1191.58  107.29
   1   9  -1 1122.39  107.49
  -1   9   1 1150.08  107.19
  -1   9   1 1199.98  107.39
   0  -9   1  175.98   15.40
   0  -9   1  159.18   15.10
   0  -9  -1  159.98   15.10
   0  -9   1  174.18   15.20
   0  -9  -1  161.98   15.40
   0   9  -1  137.09   15.10
   0   9   1  174.08   15.40
   0   9   1  136.89   15.10
   0   9  -1  130.99   15.20
   0   9  -1  136.99   15.30
   1  -9   1  850.11   73.69
  -1  -9  -1  627.74   73.59
   1  -9   1  809.12   73.49
  -1  -9  -1  817.72   73.69
  -1  -9  -1  752.42   73.49
  -1   9  -1  716.03   73.69
  -1   9  -1  700.23   73.49
   1   9   1  830.22   73.79
   1   9   1  734.33   73.59
   2  -9   1  113.59   11.00
  -2  -9  -1  109.89   11.10
   2  -9   1  117.99   11.20
  -2  -9  -1  113.29   11.20
   2   9   1  105.99   11.20
   2   9   1  115.19   11.20
  -2   9  -1  101.29   11.20
  -2   9  -1  128.09   11.20
  -2   9  -1   97.29   11.00
  -3  -9  -1  697.53   68.49
   3  -9   1  704.83   68.59
  -3  -9  -1  734.83   68.49
   3   9   1  708.13   68.59
  -3   9  -1  754.22   68.49
  -3   9  -1  684.23   68.59
   3   9   1  660.23   68.49
  -4  -9  -1  104.99   10.80
   4  -9   1  111.39   10.90
  -4  -9  -1  109.69   10.70
   4   9   1   96.29   10.60
   4   9   1  108.99   10.80
  -4   9  -1  104.49   10.80
  -5  -9  -1  509.25   51.09
   5   9   1  453.55   50.89
   5   9   1  540.75   50.99
  -5   9  -1  572.44   50.99
  -5   9  -1  526.95   51.09
  -5   9  -1  540.15   50.99
   6  -9   1    3.90    1.60
  -6  -9  -1    2.00    1.80
   6   9   1    1.60    1.50
  -6   9  -1    1.00    1.50
  -6   9  -1    0.90    1.40
   6   9   1    1.90    1.20
   7  -9   1  432.96   38.20
  -7  -9  -1  414.36   38.20
   7   9   1  318.37   37.70
  -7   9  -1  350.16   37.80
  -7   9  -1  422.46   37.90
   8  -9   1   11.10    2.70
  -8  -9  -1   11.40    2.90
   8   9   1   10.20    2.60
  -8   9  -1   14.70    2.70
  -8   9  -1   11.40    2.70
   8   9   1   18.80    2.80
  -9  -9  -1  114.29   13.20
   9  -9   1  125.49   13.20
  -9   9  -1  138.29   12.90
   9   9   1  113.69   12.90
  -9   9  -1  116.19   13.00
 -10  -9  -1    5.90    3.40
  10  -9   1    6.70    3.00
  10   9   1    1.50    3.20
  11  -9   1  148.29   15.20
 -11  -9  -1  121.29   15.30
  11   9   1  126.39   15.00
 -11 -10   1   97.69   12.60
  11 -10  -1  102.89   12.30
  10 -10  -1   25.70    4.80
 -10 -10   1   20.00    4.70
   9 -10  -1  151.18   14.20
  -9 -10   1  116.19   14.00
  -9  10   1  121.59   13.70
   9  10  -1  138.99   13.50
   9  10  -1  120.59   13.70
  -8 -10   1   64.09    8.10
   8 -10  -1   69.89    8.00
   8  10  -1   53.89    7.70
   8  10  -1   66.29    7.40
  -8  10   1   76.69    7.60
  -8  10   1   76.59    8.00
   7 -10  -1  226.58   23.70
   7  10  -1  263.67   23.30
  -7  10   1  217.48   23.30
   6 -10  -1  143.39   12.70
  -6 -10   1  134.49   12.60
   6  10  -1  108.69   12.00
   6  10  -1  114.19   12.40
  -6  10   1  106.09   12.10
  -6  10   1  129.29   12.60
  -5 -10   1  104.99   12.10
   5 -10  -1  105.89   12.10
   5  10  -1  115.99   12.10
  -5  10   1  120.99   11.80
   5  10  -1  128.39   11.80
  -5  10   1  140.79   12.30
  -5  10   1  112.29   11.80
   4 -10  -1    5.70    1.50
  -4 -10   1    5.90    1.60
  -4 -10   1    5.40    1.20
   4  10  -1    4.10    1.40
  -4  10   1    4.30    1.10
  -4  10   1    3.50    1.40
  -4  10   1    5.50    1.10
   3 -10  -1  313.17   27.30
  -3 -10   1  314.97   27.00
  -3 -10   1  249.08   27.10
  -3 -10   1  239.58   26.90
  -3  10   1  277.97   27.30
  -3  10   1  310.27   26.90
   3  10  -1  280.37   27.30
  -3  10   1  232.98   26.80
  -2 -10   1  100.69   11.30
  -2 -10   1  115.59   11.20
  -2 -10   1  115.59   11.40
   2 -10  -1  120.59   11.50
   2 -10  -1  121.19   11.10
  -2  10   1  107.09   11.60
  -1 -10   1  236.58   21.50
  -1 -10   1  195.18   21.50
   1 -10  -1  228.78   21.70
   1 -10  -1  200.98   21.40
   1  10  -1  244.58   21.70
   1  10  -1  223.08   21.80
  -1  10   1  217.08   21.80
   0 -10  -1   51.29    4.90
   0 -10  -1   50.99    5.10
   0  10  -1   40.70    5.10
   0  10   1   53.89    5.10
   0  10  -1   38.50    5.00
   0  10   1   58.69    5.40
   0  10  -1   44.40    5.20
   1 -10   1  322.87   31.10
  -1 -10  -1  357.26   31.20
  -1  10  -1  341.67   31.40
   1  10   1  256.87   31.30
   2 -10   1   45.90    4.80
  -2 -10  -1   44.70    4.70
  -2 -10  -1   44.70    4.70
   2 -10   1   38.10    4.50
  -2 -10  -1   49.20    4.90
  -2  10  -1   37.50    4.80
   2  10   1   46.20    4.90
   2  10   1   45.90    4.90
   3 -10   1   89.59    9.90
  -3 -10  -1  107.69    9.90
  -3 -10  -1   78.39    9.80
   3  10   1  109.89   10.00
  -3  10  -1  101.19   10.00
   4 -10   1   26.40    4.00
  -4 -10  -1   36.30    4.10
   4  10   1   33.00    3.80
   4  10   1   29.30    4.00
  -4  10  -1   40.10    4.10
  -4  10  -1   34.90    4.00
  -4  10  -1   35.70    4.10
  -5 -10  -1   84.29    9.40
   5 -10   1   86.69    9.40
  -5  10  -1   88.29    9.40
  -5  10  -1  105.49    9.40
   5  10   1   87.39    9.30
   5  10   1   85.59    9.10
  -6 -10  -1   48.80    5.70
   6 -10   1   40.10    5.60
  -6  10  -1   44.30    5.60
   6  10   1   44.10    5.50
   6  10   1   54.99    5.30
  -6  10  -1   49.90    5.60
  -7 -10  -1   11.20    2.60
   7 -10   1    9.00    2.40
   7  10   1    3.60    1.70
  -7  10  -1    8.80    2.30
  -7  10  -1    9.80    2.30
   7  10   1    7.40    2.10
  -8 -10  -1   11.20    3.10
   8 -10   1   11.40    3.00
   8  10   1   12.60    2.70
  -8  10  -1    9.80    2.80
  -8  10  -1    9.80    2.70
   8  10   1    9.80    2.40
   9 -10   1   45.60    6.00
  -9 -10  -1   50.19    6.30
  -9  10  -1   33.60    5.30
  -9  10  -1   48.90    6.00
   9  10   1   32.20    5.10
 -10 -10  -1    9.40    4.00
  10 -10   1   19.00    4.10
  10  10   1   14.90    3.90
 -11 -10  -1   -3.20    3.80
  11 -10   1    0.80    3.90
 -10 -11   1   14.80    4.50
  10 -11  -1   12.90    3.90
 -10  11   1   14.40    4.20
   9 -11  -1    5.20    2.90
  -9 -11   1    0.70    3.20
  -9  11   1    2.60    2.70
   9  11  -1    2.00    2.80
   9  11  -1    0.10    2.20
   8 -11  -1   21.50    3.80
  -8 -11   1   18.70    3.90
  -8  11   1   22.20    3.80
   8  11  -1   23.10    3.70
   8  11  -1   19.60    3.10
  -8  11   1   21.40    3.20
  -7 -11   1   14.50    3.20
   7  11  -1   10.70    2.50
   7  11  -1    9.90    2.00
  -7  11   1   12.60    2.30
  -7  11   1   15.60    2.90
  -6 -11   1   35.20    4.90
   6 -11  -1   35.80    4.80
   6  11  -1   41.10    4.30
   6  11  -1   34.70    4.80
  -6  11   1   37.50    5.00
  -5 -11   1    0.50    1.30
  -5 -11   1    5.30    1.80
   5 -11  -1    2.50    1.50
  -5  11   1    0.70    1.10
   5  11  -1    2.50    1.00
   5  11  -1    1.90    1.50
  -5  11   1    2.20    1.60
  -5  11   1    3.90    1.30
   4 -11  -1    0.30    1.30
  -4 -11   1    2.30    1.40
  -4 -11   1    0.10    1.10
  -4  11   1    2.00    1.00
  -4  11   1    1.80    0.90
  -4  11   1    2.90    1.60
   4  11  -1    2.20    1.40
  -3 -11   1   89.09    9.40
   3 -11  -1   95.79    9.70
  -3 -11   1  115.09    9.70
  -3  11   1   85.39    9.30
  -3  11   1   89.89    9.30
  -3  11   1  109.59    9.90
   3  11  -1   82.59    9.70
   2 -11  -1  137.19   13.00
  -2 -11   1  134.39   13.30
   2 -11  -1  140.79   13.40
  -2 -11   1  118.79   13.20
  -2 -11   1  151.88   13.20
  -2  11   1  111.69   13.10
   2  11  -1  144.09   13.50
  -2  11   1  130.79   13.50
   1 -11  -1  257.07   24.00
  -1 -11   1  239.98   23.90
   1 -11  -1  221.18   23.70
   1  11  -1  259.47   24.00
   1  11  -1  247.98   24.10
  -1  11   1  239.88   24.10
   0 -11  -1  442.06   41.40
   0 -11  -1  438.56   41.60
   0 -11   1  436.46   41.50
   0 -11   1  473.85   41.50
   0  11   1  399.56   41.70
   0  11  -1  365.96   41.70
  -1 -11  -1  236.28   21.50
  -1 -11  -1  178.88   21.30
  -1 -11  -1  216.08   21.30
   1 -11   1  225.78   21.40
  -1  11  -1  216.88   21.60
  -1  11  -1  233.98   21.50
   1  11   1  218.88   21.60
   2 -11   1  347.77   32.00
  -2 -11  -1  353.36   32.00
  -2 -11  -1  326.17   31.90
   2  11   1  293.37   32.10
  -2  11  -1  312.97   32.10
   3 -11   1  196.38   19.60
   3  11   1  214.78   19.70
  -3  11  -1  183.68   19.40
  -3  11  -1  195.58   19.60
  -4 -11  -1  181.28   20.00
   4  11   1  197.48   19.90
  -4  11  -1  212.28   20.00
  -4  11  -1  217.08   20.20
   5 -11   1  361.06   30.70
  -5 -11  -1  277.07   30.40
   5  11   1  257.17   30.40
  -5  11  -1  361.86   30.60
  -5  11  -1  267.57   30.30
   5  11   1  336.67   30.30
  -6 -11  -1  334.37   29.80
  -6  11  -1  261.27   29.50
   6  11   1  350.46   29.50
   6  11   1  271.07   29.60
  -6  11  -1  285.37   29.70
  -7  11  -1  130.29   14.40
   7  11   1  142.69   14.50
   7  11   1  148.49   14.30
   8 -11   1  120.59   12.90
  -8 -11  -1  136.39   13.10
  -8  11  -1  100.79   12.60
   8  11   1  117.49   12.40
  -8  11  -1  122.19   12.70
   8  11   1  121.09   12.60
  -9 -11  -1   42.70    7.00
   9 -11   1   54.19    7.70
  -9  11  -1   66.59    7.20
   9  11   1   44.20    6.80
  -9  11  -1   63.89    7.30
  10 -11   1  101.59   10.30
 -10 -11  -1   61.09    9.90
  10  11   1   79.59    9.80
  10 -12  -1  137.09   15.20
 -10 -12   1  140.39   15.00
 -10  12   1  123.59   15.20
   9 -12  -1   20.60    4.40
  -9 -12   1   22.20    4.60
  -9  12   1   26.90    4.50
   9  12  -1   25.80    4.50
  -8 -12   1  171.78   19.50
   8 -12  -1  190.08   19.60
  -8  12   1  209.08   19.70
   8  12  -1  190.98   19.50
   7 -12  -1   40.90    5.60
  -7  12   1   58.39    6.20
   7  12  -1   36.90    5.60
   7  12  -1   37.40    4.90
  -6 -12   1  243.98   22.60
   6 -12  -1  226.48   22.60
   6  12  -1  204.68   22.00
   6  12  -1  225.98   22.50
   5 -12  -1   38.30    5.80
  -5 -12   1   59.39    5.70
  -5  12   1   61.59    6.20
  -5  12   1   52.09    5.50
   5  12  -1   41.30    5.90
  -4 -12   1  658.23   56.49
  -4 -12   1  507.45   56.09
  -4  12   1  525.55   56.09
  -4  12   1  633.64   56.59
   3 -12  -1   21.80    3.30
  -3 -12   1   21.50    3.20
  -3 -12   1   33.80    3.50
  -3  12   1   31.90    3.80
  -3  12   1   27.90    3.00
  -3  12   1   21.50    3.00
   3  12  -1   31.90    3.80
   2 -12  -1  340.87   35.80
  -2 -12   1  325.27   36.00
  -2 -12   1  396.56   36.20
   2 -12  -1  414.26   36.30
   2  12  -1  384.96   36.40
  -2  12   1  333.57   35.90
  -2  12   1  405.06   36.40
   1 -12  -1   19.40    2.40
  -1 -12   1   17.00    2.50
  -1 -12   1   19.90    2.30
   1 -12  -1   17.60    2.10
  -1 -12   1   15.80    2.40
   1  12  -1   20.00    2.90
  -1  12   1   14.70    2.40
  -1  12   1   11.90    2.40
   0 -12  -1  200.18   23.60
   0 -12   1  259.77   23.60
   0 -12   1  229.78   23.50
   0  12  -1  238.78   23.80
   0  12   1  243.98   23.90
   0  12  -1  272.87   23.70
   1 -12   1  104.99   10.70
  -1 -12  -1  105.29   10.70
   1  12   1  103.69   10.90
  -1  12  -1  103.19   10.90
  -1  12  -1  106.99   10.70
   1  12   1  109.69   10.80
   2 -12   1  505.15   48.20
  -2 -12  -1  487.75   48.30
   2 -12   1  523.75   48.50
  -2 -12  -1  530.85   48.40
  -2  12  -1  445.26   48.50
  -2  12  -1  486.75   48.30
  -3 -12  -1   12.50    2.10
   3 -12   1   11.30    2.10
  -3 -12  -1   12.60    2.00
   3  12   1   10.40    2.20
  -3  12  -1   13.20    2.00
  -3  12  -1    8.90    2.10
  -4 -12  -1  390.96   36.50
   4  12   1  321.07   36.50
  -4  12  -1  402.86   36.30
  -4  12  -1  408.46   36.70
  -4  12  -1  339.87   36.40
  -5 -12  -1   12.80    2.40
   5 -12   1    9.20    2.40
   5  12   1   10.90    1.90
   5  12   1    9.00    2.30
  -5  12  -1   14.70    2.60
  -5  12  -1   11.70    2.10
  -6 -12  -1   41.10    5.10
   6 -12   1   32.80    5.00
   6  12   1   32.50    5.00
  -6  12  -1   49.50    5.30
  -6  12  -1   33.30    4.90
   6  12   1   41.20    4.60
   7 -12   1    0.70    2.10
  -7 -12  -1    0.60    2.20
   7  12   1    2.20    2.20
   7  12   1    4.60    1.70
  -7  12  -1    2.20    2.00
  -7  12  -1    2.50    2.30
  -8 -12  -1    6.50    2.80
   8 -12   1    7.30    2.90
  -8  12  -1    2.40    2.70
  -8  12  -1    2.40    2.70
   8  12   1    5.90    2.20
   8  12   1    7.10    2.90
  -9 -12  -1    0.40    2.90
   9 -12   1    7.00    3.40
  -9  12  -1    6.90    3.10
   9  12   1    2.20    2.70
 -10 -12  -1   67.59    9.40
  10 -12   1   74.29    9.70
 -10 -13   1   58.29    7.80
  10 -13  -1   38.80    6.80
  -9 -13   1    5.80    3.50
   9 -13  -1    0.30    3.10
  -9  13   1   -1.00    3.20
   9  13  -1    1.30    3.40
  -8 -13   1  140.09   14.00
   8 -13  -1  122.09   13.80
   8  13  -1  129.19   13.80
  -8  13   1  122.69   13.90
   7 -13  -1   10.50    2.70
  -7 -13   1   11.30    3.00
   7  13  -1    7.00    2.90
  -7  13   1    9.50    2.90
   6 -13  -1  275.27   27.50
  -6  13   1  290.37   27.50
   6  13  -1  257.87   27.40
   5 -13  -1    1.50    1.70
  -5 -13   1   -1.00    1.70
  -5 -13   1    2.00    1.30
  -5  13   1    4.10    1.90
  -5  13   1    0.40    1.30
   5  13  -1    2.40    1.80
   4 -13  -1  147.49   17.40
  -4 -13   1  170.18   17.10
   4  13  -1  157.28   17.50
  -4  13   1  176.68   17.00
  -4  13   1  177.78   17.10
  -4  13   1  216.88   17.90
  -3 -13   1   -2.40    0.80
  -3 -13   1   -0.50    1.20
  -3 -13   1    1.70    1.40
   3 -13  -1    1.00    1.10
  -3  13   1   -0.90    1.40
   3  13  -1    0.80    1.60
  -3  13   1    0.80    0.90
  -3  13   1    0.00    1.20
  -2 -13   1  550.14   53.59
  -2 -13   1  586.84   53.49
   2 -13  -1  542.25   53.29
   2  13  -1  532.75   53.79
  -2  13   1  538.85   53.89
  -1 -13   1    1.50    1.20
  -1 -13   1    0.40    0.80
   1 -13  -1    2.20    1.00
  -1 -13   1   -2.30    1.50
   1 -13  -1    0.30    0.70
  -1  13   1    1.00    1.20
   1  13  -1   -0.20    1.30
  -1  13   1   -0.10    1.40
   0 -13  -1  638.74   59.19
   0 -13   1  507.75   59.29
   0 -13   1  661.83   59.29
   0  13  -1  636.74   59.69
   1 -13   1   37.60    3.80
  -1 -13  -1   24.20    3.60
   1 -13   1   29.30    3.50
  -1 -13  -1   31.60    3.70
   1  13   1   28.20    4.10
  -1  13  -1   29.30    4.10
  -1  13  -1   41.40    4.20
   2 -13   1  712.33   74.09
  -2 -13  -1  775.22   74.29
  -2  13  -1  782.12   74.59
   2  13   1  775.02   74.49
  -2  13  -1  782.52   74.19
   3 -13   1   17.80    2.90
  -3 -13  -1   21.20    3.00
  -3 -13  -1   24.10    3.10
  -3  13  -1   26.40    3.30
   3  13   1   18.80    3.10
  -3  13  -1   24.00    3.50
   4 -13   1   81.09    9.10
  -4 -13  -1   84.09    9.00
  -4 -13  -1   95.99    9.20
  -4  13  -1   88.39    9.00
   4  13   1   83.09    9.30
   5 -13   1    3.00    1.80
  -5 -13  -1   -2.70    1.70
  -5  13  -1    1.20    1.50
  -5  13  -1    1.10    1.90
   5  13   1    2.70    1.80
   6 -13   1  208.88   23.60
  -6 -13  -1  272.97   23.80
   6  13   1  270.27   23.40
   6  13   1  209.68   23.50
  -6  13  -1  217.38   23.40
  -7 -13  -1    3.30    2.60
   7 -13   1    0.50    2.20
  -7  13  -1   -0.30    2.50
  -7  13  -1    0.40    2.20
   7  13   1    0.30    1.70
   7  13   1    3.30    2.40
   8 -13   1  152.28   15.80
  -8 -13  -1  147.39   15.70
   8  13   1  138.99   15.50
  -8  13  -1  160.68   15.90
   8  13   1  143.09   15.20
  -9 -13  -1    3.40    3.90
   9 -13   1    5.70    3.60
  -9  13  -1   11.80    3.80
 -10 -13  -1  188.18   20.20
  10 -13   1  181.38   19.80
   9 -14  -1   12.70    3.80
  -9 -14   1    6.20    3.60
  -9  14   1    7.80    4.00
   9  14  -1    8.00    3.90
  -8 -14   1   81.79    9.80
   8 -14  -1   93.39    9.70
   8  14  -1   76.49    9.60
  -8  14   1   67.59    9.60
  -7 -14   1   22.30    4.20
   7 -14  -1   23.70    4.00
  -7  14   1   29.80    4.50
   7  14  -1   23.10    4.10
   6 -14  -1  198.78   20.80
  -6 -14   1  207.98   20.30
  -6 -14   1  185.08   20.80
   6  14  -1  196.78   20.80
  -6  14   1  237.38   21.10
  -5 -14   1   10.90    2.50
  -5 -14   1    5.70    1.60
   5 -14  -1    7.10    2.10
  -5  14   1    8.30    2.70
  -5  14   1    7.80    1.60
   5  14  -1    6.50    2.30
  -4 -14   1  220.88   20.90
   4 -14  -1  204.58   21.30
   4  14  -1  208.08   21.40
  -4  14   1  214.08   20.90
   3 -14  -1   64.19    7.30
  -3 -14   1   65.19    6.90
  -3 -14   1   80.19    7.30
  -3  14   1   65.79    6.90
  -3  14   1   62.09    6.80
  -3  14   1   59.99    7.60
   3  14  -1   67.69    7.50
   2 -14  -1   64.69    5.80
  -2 -14   1   67.39    6.30
   2 -14  -1   53.39    6.20
  -2  14   1   52.89    6.00
  -2  14   1   49.00    6.60
   2  14  -1   47.10    6.40
  -1 -14   1   85.79   10.20
  -1 -14   1  106.39   10.40
   1 -14  -1   85.09   10.30
  -1  14   1  113.49   10.40
  -1  14   1  113.49   10.90
   1  14  -1  114.99   10.80
   0 -14  -1  230.18   21.30
   0 -14   1  220.48   21.20
   0 -14  -1  204.48   21.10
   0  14   1  210.38   21.60
   0  14  -1  190.38   21.50
   0  14   1  232.78   21.30
   1 -14   1   58.69    7.00
  -1 -14  -1   58.19    6.90
   1 -14   1   76.49    6.90
  -1  14  -1   77.89    7.50
   1  14   1   61.49    7.30
  -2 -14  -1  244.88   25.00
   2 -14   1  252.17   24.90
   2 -14   1  266.17   25.20
  -3 -14  -1   10.20    1.90
   3 -14   1    8.50    2.00
  -3 -14  -1   15.10    2.30
   3  14   1    6.80    2.10
  -3  14  -1   11.90    2.50
  -4 -14  -1   58.69    5.70
  -4 -14  -1   45.60    5.30
   4 -14   1   39.90    5.50
  -4  14  -1   51.39    5.80
  -4  14  -1   45.00    5.40
   4  14   1   36.00    5.70
  -5 -14  -1   43.30    5.60
  -5 -14  -1   54.49    6.00
   5 -14   1   55.19    6.10
   5  14   1   50.49    6.20
  -5  14  -1   42.20    5.60
  -5  14  -1   44.60    6.10
   6 -14   1   13.50    2.90
  -6  14  -1   16.20    3.20
  -6  14  -1   10.30    2.70
   6  14   1   18.00    3.30
  -7 -14  -1   -1.70    2.90
   7 -14   1    1.10    2.50
  -7  14  -1   -2.90    2.40
   7  14   1    3.30    2.70
   8 -14   1    4.60    3.10
  -8 -14  -1    8.90    3.60
  -8  14  -1    7.50    3.70
   8  14   1    9.40    3.30
   8  14   1   11.50    2.80
  -9 -14  -1   17.60    5.30
   9 -14   1   39.70    5.70
  -9  14  -1   29.50    5.40
   9 -15  -1   36.10    6.10
  -9 -15   1   32.30    6.40
  -9  15   1   38.50    6.00
   9  15  -1   34.80    6.70
  -8 -15   1    9.80    4.00
   8 -15  -1   10.10    3.20
  -8  15   1   10.80    3.90
   8  15  -1    8.80    3.80
  -7 -15   1   81.89   10.10
   7 -15  -1   91.79   10.20
   7  15  -1   89.29   10.30
  -7  15   1   91.39   10.40
   6 -15  -1   30.30    5.00
  -6 -15   1   50.49    5.80
  -6  15   1   38.10    5.80
  -5 -15   1   93.09    9.60
  -5 -15   1   93.79   10.20
   5  15  -1   92.39   10.30
  -4 -15   1   71.09    7.10
   4 -15  -1   62.49    7.60
  -4  15   1   65.89    8.10
   4  15  -1   73.79    8.00
  -4  15   1   65.19    7.10
  -3 -15   1  213.58   20.80
   3 -15  -1  205.18   21.10
  -3  15   1  216.98   21.40
   3  15  -1  204.28   21.30
  -3  15   1  214.28   20.70
  -2 -15   1  110.79   11.00
  -2 -15   1  132.79   11.40
   2 -15  -1   99.29   10.80
   2 -15  -1  104.49   11.30
   2  15  -1  104.69   11.50
  -2  15   1  109.19   11.70
   1 -15  -1  199.18   16.80
   1 -15  -1  161.68   17.00
  -1 -15   1  170.58   16.90
  -1 -15   1  178.28   16.90
  -1  15   1  160.58   17.30
   1  15  -1  141.69   17.20
   0 -15  -1  115.19   11.60
   0 -15  -1  119.69   11.80
   0 -15   1   98.19   11.70
   0 -15   1  132.09   11.70
   0  15   1   95.19   12.10
   0  15  -1  134.29   12.20
  -1 -15  -1  142.59   15.30
   1 -15   1  157.48   15.40
   1  15   1  149.99   15.70
  -1  15  -1  161.28   15.70
  -2 -15  -1  242.38   23.40
   2 -15   1  241.68   23.20
   2 -15   1  212.58   23.40
  -2 -15  -1  260.87   23.40
  -2  15  -1  236.28   23.80
   2  15   1  222.28   23.70
   3 -15   1  134.39   14.90
  -3 -15  -1  172.28   14.80
  -3 -15  -1  136.69   14.80
   3  15   1  141.29   15.10
  -4 -15  -1  101.39   10.30
   4 -15   1   97.39   10.50
   4  15   1   98.29   10.60
  -4  15  -1   94.69   10.20
  -5 -15  -1  150.68   14.10
   5 -15   1  134.99   14.30
   5  15   1  131.59   14.40
  -5  15  -1  129.49   14.00
  -6 -15  -1   60.59    7.10
  -6 -15  -1   58.69    7.30
   6 -15   1   55.79    7.50
  -6  15  -1   73.39    8.00
   6  15   1   56.59    7.60
   7 -15   1   98.79   11.60
  -7 -15  -1  112.39   11.50
   7  15   1   99.79   11.60
  -7  15  -1   98.89   11.60
  -8 -15  -1  120.69   13.70
   8 -15   1  126.89   13.80
   8  15   1  115.59   13.80
  -8  15  -1  135.09   14.20
   9 -15   1   44.50    6.80
  -9 -15  -1   41.30    6.50
  -9 -16   1   70.49   10.10
  -9  16   1   65.59    9.20
  -8 -16   1   21.50    4.80
   8 -16  -1   36.40    5.10
  -8  16   1   25.50    4.90
   8  16  -1   18.20    4.90
  -7 -16   1  136.49   14.90
   7 -16  -1  142.29   14.90
   7  16  -1  142.39   15.10
  -7  16   1  132.09   15.10
   6 -16  -1   65.59    9.50
  -6 -16   1   99.69    9.70
   6  16  -1   71.39    9.80
  -6  16   1   98.49    9.90
  -5 -16   1  134.19   13.30
   5 -16  -1  129.19   13.80
   5  16  -1  126.79   14.10
  -4 -16   1   45.10    5.10
   4 -16  -1   45.10    5.80
   4  16  -1   44.10    6.10
   3 -16  -1  163.18   18.30
  -3 -16   1  176.38   18.00
  -3  16   1  210.38   18.00
   3  16  -1  172.58   18.60
   2 -16  -1   83.39   10.20
  -2 -16   1   88.19   10.20
  -2 -16   1  100.19   10.00
   2  16  -1  105.19   10.70
  -2  16   1  119.49   10.90
   1 -16  -1  142.19   15.10
  -1 -16   1  146.59   14.90
  -1 -16   1  176.28   15.10
   1 -16  -1  135.59   14.70
  -1  16   1  149.19   15.50
   0 -16  -1  123.09   11.70
   0 -16   1  115.29   11.90
   0 -16   1  119.59   11.80
   0  16   1  107.09   12.40
   0  16  -1  112.19   12.30
  -1 -16  -1  281.37   24.10
  -1 -16  -1  218.88   24.10
   1 -16   1  219.88   24.00
   1 -16   1  234.28   24.20
   1  16   1  273.37   24.70
   2 -16   1   72.89    7.40
  -2 -16  -1   59.19    7.50
  -2 -16  -1   73.89    7.70
   2 -16   1   67.59    7.80
   2  16   1   89.59    8.40
   3 -16   1   42.20    5.50
  -3 -16  -1   49.80    5.50
  -3 -16  -1   37.00    5.20
  -3  16  -1   40.90    6.00
   3  16   1   56.79    6.10
   4 -16   1    1.40    2.00
  -4 -16  -1    3.50    1.80
  -4 -16  -1    5.00    2.10
  -4  16  -1    4.40    1.90
  -4  16  -1    3.30    2.40
   4  16   1    6.00    2.40
  -5 -16  -1   98.49   10.30
  -5 -16  -1   89.19   10.00
   5 -16   1   92.39   10.30
  -5  16  -1   94.39   10.30
  -5  16  -1  104.29   10.70
   5  16   1   83.39   10.50
  -6 -16  -1    0.90    2.70
   6 -16   1    1.30    2.50
  -6 -16  -1    0.80    2.30
  -6  16  -1   -2.10    2.70
   7 -16   1   66.39    8.30
  -7 -16  -1   63.29    8.10
   7  16   1   56.99    8.30
  -7  16  -1   58.99    8.30
  -8 -16  -1    6.90    3.70
   8 -16   1    9.50    3.90
   8  16   1    6.10    4.00
  -8  16  -1    3.00    4.20
  -9 -16  -1   66.09    9.80
  -8 -17   1    5.40    4.20
   8 -17  -1    4.10    3.80
   8  17  -1    5.50    4.20
  -8  17   1    6.70    4.60
   7 -17  -1   61.29    7.60
  -7 -17   1   49.99    7.50
  -7  17   1   43.70    7.00
   7  17  -1   52.09    7.90
  -6 -17   1   23.20    4.00
   6 -17  -1   17.90    3.90
  -6  17   1   17.50    4.20
   6  17  -1   23.20    4.40
   5 -17  -1  109.19   11.80
  -5 -17   1  118.89   12.00
  -5  17   1  116.29   12.30
   5  17  -1   91.89   11.90
  -4 -17   1   11.40    2.70
  -4 -17   1    5.10    1.70
   4 -17  -1    5.50    2.20
  -4  17   1    2.90    2.80
   4  17  -1    5.40    2.60
  -3 -17   1  141.29   12.70
  -3 -17   1  116.39   12.20
   3 -17  -1  107.79   12.60
   3  17  -1  120.09   13.00
  -2 -17   1    2.20    1.80
   2 -17  -1   -1.20    1.70
  -2 -17   1    0.10    1.30
  -2  17   1   -0.60    2.30
   1 -17  -1  122.99   13.50
  -1 -17   1  159.28   13.90
  -1 -17   1  144.69   13.80
   1 -17  -1  122.69   13.90
   0 -17   1    6.50    1.70
   0 -17   1    3.20    1.70
   0 -17  -1    2.90    1.40
   0 -17  -1    2.80    1.60
   0  17   1    4.30    2.50
   0  17  -1    4.00    2.30
   1 -17   1  141.69   14.50
  -1 -17  -1  140.79   14.70
  -1 -17  -1  150.58   14.60
   1 -17   1  151.18   14.90
   1  17   1  143.49   15.30
   2 -17   1   28.80    4.30
   2 -17   1   29.40    3.70
  -2 -17  -1   30.40    4.20
  -2 -17  -1   29.90    4.00
   2  17   1   24.10    4.30
  -3 -17  -1  205.78   20.40
   3 -17   1  202.88   20.60
   4 -17   1    2.10    2.50
  -4 -17  -1    2.60    1.90
  -4 -17  -1    7.40    2.40
  -4  17  -1    4.40    2.60
   4  17   1    7.40    3.00
  -5 -17  -1  198.88   17.60
   5 -17   1  142.79   17.50
  -5 -17  -1  146.89   17.20
   5  17   1  169.28   17.80
  -5  17  -1  202.58   18.10
   6 -17   1    0.20    2.70
  -6 -17  -1    0.20    2.90
   6  17   1    7.90    3.30
  -6  17  -1   -0.60    3.20
  -7 -17  -1  147.89   18.10
  -7  17  -1  157.18   18.30
   7  17   1  220.38   18.80
   8 -17   1    4.10    3.80
  -8 -17  -1    1.00    4.40
  -8  17  -1    9.40    4.70
  -8 -18   1    4.30    4.50
   8  18  -1    2.20    4.70
  -8  18   1    4.70    5.20
  -7 -18   1   58.49    9.20
   7 -18  -1   78.89    9.60
   7  18  -1   76.19   10.20
  -6 -18   1   12.00    3.70
   6 -18  -1    6.60    3.40
   6  18  -1    7.70    3.60
  -6  18   1    6.00    3.30
  -5 -18   1   77.39    9.40
   5 -18  -1   89.09    9.50
   5  18  -1   80.29    9.80
  -5  18   1   74.59   10.10
  -4 -18   1   28.50    4.10
   4 -18  -1   21.50    3.70
   4  18  -1   16.70    4.20
  -4  18   1   26.00    4.70
   3 -18  -1  107.49   12.80
  -3 -18   1  115.39   12.80
  -3 -18   1  124.19   12.40
  -3  18   1  144.59   13.50
   3  18  -1  119.19   13.20
  -2 -18   1    3.80    2.10
   2 -18  -1    4.90    2.20
  -2 -18   1    6.60    1.90
  -2  18   1    6.00    3.00
   2  18  -1    6.60    2.80
  -1 -18   1   33.50    4.40
  -1 -18   1   27.30    4.20
   1 -18  -1   27.90    4.40
   1 -18  -1   32.90    3.70
  -1  18   1   29.10    4.80
   1  18  -1   29.10    4.60
   0 -18   1   42.20    5.30
   0 -18   1   42.70    5.10
   0 -18  -1   45.20    4.90
   0 -18  -1   39.10    5.20
   0  18   1   38.40    5.90
   0  18  -1   37.90    5.90
  -1 -18  -1   38.10    4.70
   1 -18   1   33.60    4.50
  -1 -18  -1   36.10    4.60
   1 -18   1   31.30    4.90
  -1  18  -1   46.70    6.00
   1  18   1   35.50    5.40
   2 -18   1   83.19    8.50
   2 -18   1   75.19    9.00
  -2 -18  -1   83.09    9.00
  -2 -18  -1   74.49    8.80
  -2  18  -1  103.79    9.80
   2  18   1   77.89    9.40
  -3 -18  -1   43.00    5.10
   3 -18   1   36.30    5.40
  -3 -18  -1   35.30    5.50
   3  18   1   37.10    5.50
  -3  18  -1   40.00    5.70
   4 -18   1   36.10    5.20
  -4 -18  -1   31.50    5.20
  -4 -18  -1   38.60    5.80
  -4  18  -1   52.49    6.50
   4  18   1   42.00    5.90
   5 -18   1    8.40    3.00
  -5 -18  -1   12.60    3.30
   5  18   1   11.70    3.70
  -5  18  -1    4.40    3.40
   6 -18   1   23.70    4.60
  -6 -18  -1   21.40    4.40
  -6  18  -1   19.50    4.80
   6  18   1   27.90    5.20
   7 -18   1   15.70    4.20
  -7 -18  -1   11.60    4.30
  -7  18  -1    5.60    4.10
   7  18   1   22.40    5.00
   8 -18   1   16.80    5.20
  -8 -18  -1   10.80    4.90
  -8  18  -1   11.90    5.40
   7 -19  -1    8.50    3.80
  -7 -19   1    9.90    4.60
   7  19  -1    1.40    4.70
  -7  19   1    1.20    4.20
   6 -19  -1   61.59    8.00
  -6 -19   1   38.40    6.60
   6  19  -1   67.09    8.60
  -6  19   1   42.60    7.10
  -5 -19   1   36.70    5.40
   5 -19  -1   33.60    5.20
  -5  19   1   31.40    5.90
   5  19  -1   34.30    5.80
   4 -19  -1   39.20    6.30
  -4 -19   1   42.80    5.80
   4  19  -1   39.00    6.20
  -4  19   1   50.69    6.70
   3 -19  -1   24.90    4.40
   3  19  -1   44.80    6.10
  -3  19   1   27.60    4.90
  -2 -19   1   97.49   10.80
   2 -19  -1   98.79   11.00
   2  19  -1  105.19   11.70
  -2  19   1  105.69   11.70
   1 -19  -1   68.59    8.10
  -1 -19   1   72.39    7.80
  -1 -19   1   67.39    7.90
   1  19  -1   73.39    8.80
  -1  19   1   66.99    8.70
   0 -19  -1   87.39    8.30
   0 -19   1   71.79    8.40
   0 -19  -1   74.19    8.70
   0 -19   1   77.59    8.60
   0  19   1   73.29    9.40
   0  19  -1   78.69    9.30
  -1 -19  -1   65.19    8.10
   1 -19   1   67.39    8.40
  -1 -19  -1   69.29    8.20
   1 -19   1   86.09    8.00
   1  19   1   80.89    9.10
  -1  19  -1   71.49    9.00
  -2 -19  -1   96.89   10.90
   2 -19   1  101.39   11.20
  -2 -19  -1  120.69   11.20
   2  19   1   96.69   11.90
  -2  19  -1  102.09   11.80
  -3 -19  -1  129.39   14.00
  -3 -19  -1  123.39   13.70
   3 -19   1  136.79   14.00
   3  19   1  133.69   14.50
  -3  19  -1  143.49   14.60
   4 -19   1   64.39    8.10
  -4 -19  -1   76.69    7.40
  -4 -19  -1   53.59    7.90
  -4  19  -1   51.79    8.30
   4  19   1   60.29    8.40
   5 -19   1   95.19   10.90
  -5 -19  -1   95.39   10.90
   5  19   1   91.49   11.40
  -5  19  -1   94.29   11.50
  -6 -19  -1   35.50    5.90
   6 -19   1   50.09    7.10
  -6  19  -1   32.90    6.30
   6  19   1   45.00    6.80
   7 -19   1   73.59   10.40
  -7 -19  -1   70.79   10.30
   7  19   1   87.09   11.40
  -6 -20   1   46.10    7.20
  -6  20   1   59.29    8.00
  -5 -20   1   26.00    5.10
   5 -20  -1   39.60    5.60
  -5  20   1   25.90    5.90
   5  20  -1   41.00    6.00
   4 -20  -1   44.20    6.70
  -4 -20   1   37.00    5.90
   4  20  -1   51.59    7.60
  -4  20   1   44.90    6.90
   3 -20  -1   38.50    5.90
  -3 -20   1   42.80    6.50
  -3  20   1   53.39    7.30
   3  20  -1   48.50    6.70
  -2 -20   1   31.00    5.00
   2 -20  -1   39.30    5.60
  -2  20   1   39.70    5.90
   2  20  -1   39.80    5.80
  -1 -20   1   44.10    5.60
  -1 -20   1   43.30    5.50
   1 -20  -1   36.80    5.70
  -1  20   1   35.10    5.70
   1  20  -1   36.20    5.70
   0 -20  -1   19.20    3.40
   0 -20   1   16.30    2.90
   0 -20   1   12.10    3.10
   0  20  -1   18.80    4.20
   0  20   1   17.40    3.90
  -1 -20  -1   14.00    3.00
   1 -20   1   16.10    3.20
   1  20   1   13.80    4.00
  -1  20  -1   10.50    3.40
   2 -20   1   51.99    8.30
  -2 -20  -1   83.49    8.00
  -2 -20  -1   72.79    8.20
  -2  20  -1   60.29    8.90
   2  20   1   73.19    9.40
  -3 -20  -1   10.70    2.80
  -3 -20  -1   10.40    3.40
   3 -20   1   11.70    3.30
  -3  20  -1   10.20    3.80
   3  20   1   13.60    4.10
   4 -20   1   26.60    4.60
  -4 -20  -1   25.20    4.60
   4  20   1   22.70    5.00
  -4  20  -1   23.20    4.90
   5 -20   1   13.70    4.10
  -5 -20  -1   11.20    4.20
  -5  20  -1   15.40    4.70
   5  20   1   17.20    4.50
  -6 -20  -1   21.20    5.00
   6 -20   1   23.70    4.80
   6  20   1   30.50    5.90
  -6  20  -1   14.60    5.20
   6 -21  -1   28.30    5.90
  -6 -21   1   23.70    5.50
   6  21  -1   33.40    6.80
   5 -21  -1    1.90    3.70
  -5 -21   1   -3.60    3.80
   5  21  -1    5.80    4.80
  -5  21   1    0.70    4.40
   4 -21  -1   44.80    6.00
  -4 -21   1   33.30    5.80
  -4  21   1   30.40    6.30
   4  21  -1   49.30    7.00
   3 -21  -1    3.80    3.00
  -3 -21   1    3.70    3.10
  -3  21   1   -0.60    3.60
   3  21  -1    5.10    4.10
   2 -21  -1   67.69    9.50
  -2 -21   1   93.99    9.70
   2  21  -1   80.99   10.20
  -2  21   1   80.09   10.40
   1 -21  -1    8.40    3.10
  -1 -21   1   11.80    3.20
  -1  21   1    7.10    3.90
   1  21  -1   12.20    4.10
   0 -21  -1   46.60    7.50
   0 -21   1   61.39    7.70
   0  21   1   59.19    8.60
   0  21  -1   68.89    8.60
  -1 -21  -1   -0.20    2.60
   1  21   1    3.10    3.60
  -1  21  -1    4.60    3.20
   2 -21   1   67.49    8.20
  -2  21  -1   57.99    9.10
   2  21   1   66.89    9.20
  -3 -21  -1   -0.70    3.40
   3 -21   1   -0.20    3.10
   3  21   1    0.50    3.80
  -3  21  -1    3.80    3.50
  -4 -21  -1   74.09   10.10
  -4  21  -1   67.69   10.40
   4  21   1  104.79   11.30
  -5 -21  -1   -0.50    4.10
   5 -21   1    1.50    3.80
  -5  21  -1    2.40    4.70
   5  21   1    0.00    4.60
   4 -22  -1   39.10    5.90
  -4 -22   1   25.40    5.70
   4  22  -1   38.10    6.60
  -4  22   1   43.50    7.20
   3 -22  -1   10.40    3.80
  -3 -22   1   -3.80    3.60
  -3  22   1    1.90    4.20
   3  22  -1    3.80    4.30
   2 -22  -1   74.09    9.90
  -2  22   1   82.09   10.90
   2  22  -1   89.99   11.00
   1 -22  -1    2.60    3.20
  -1  22   1   -2.90    3.70
   1  22  -1   -0.40    4.00
   0 -22  -1   79.89   10.10
   0  22  -1   87.79   11.10
   0  22   1   96.49   11.40
  -1  22  -1    7.20    4.00
   1  22   1   17.60    4.90
   2 -22   1   47.10    6.50
   2  22   1   46.40    7.50
  -2  22  -1   55.69    7.70
   3 -22   1   23.60    4.70
  -3  22  -1   18.00    5.00
   3  22   1   20.20    5.70
   4 -22   1   22.20    4.60
   4  22   1   20.80    5.70
  -4  22  -1    7.40    5.20
   3 -23  -1    2.40    4.20
   2 -23  -1   46.00    6.70
   1 -23  -1   -0.30    3.60
  -1  23   1    8.30    4.70
   1  23  -1    4.80    4.90
   0  23  -1   39.30    6.80
   0  23   1   35.50    6.70
  -1  23  -1   -6.50    4.00
   1  23   1    6.00    4.90
   2  23   1   88.69   12.00
 -12   0   2    0.30    4.00
  12   0  -2    1.20    4.00
 -11   0   2   -0.60    3.00
  11   0  -2    2.50    3.10
  10   0  -2    3.20    2.40
  10   0  -2   -1.20    2.10
  -9   0   2   -0.80    2.00
   9   0  -2   -0.30    1.70
   9   0  -2    2.80    1.80
   8   0  -2   10.20    2.10
  -8   0   2    9.20    2.20
   8   0  -2    8.30    1.90
   7   0  -2    0.10    1.10
   7   0  -2   -0.40    1.00
  -7   0   2    0.00    1.40
  -6   0   2    3.40    1.30
   6   0  -2    4.00    1.20
   6   0  -2    5.00    1.40
  -5   0   2    0.00    0.90
   5   0  -2   -0.60    0.90
  -5   0   2   -1.00    0.80
   5   0  -2    0.80    1.00
   5   0  -2    0.60    0.70
  -4   0   2    1.10    0.70
  -4   0   2    0.70    0.80
   4   0  -2    1.20    0.60
   4   0  -2   -0.40    0.80
  -4   0   2    1.20    0.70
   4   0  -2    1.20    0.70
   3   0  -2    0.90    0.50
   3   0  -2    0.20    0.40
  -3   0   2    1.60    0.50
   3   0  -2    0.80    0.50
  -3   0   2    0.00    0.50
  -3   0   2    0.40    0.50
  -2   0   2   11.30    1.40
   2   0  -2   12.50    1.40
  -2   0   2   11.90    1.30
   2   0  -2   12.10    1.30
  -1   0   2    0.00    0.20
  -1   0   2   -0.10    0.20
   1   0  -2    0.30    0.20
  -1   0   2    0.00    0.30
   1   0  -2    0.00    0.30
   1   0  -2   -0.10    0.30
   0   0   2  304.17   31.80
   0   0  -2  340.27   31.80
   0   0  -2  360.66   31.80
   0   0   2  319.27   31.80
   0   0  -2  352.96   31.80
   0   0   2  292.17   31.80
   1   0   2   -0.20    0.20
  -1   0  -2   -0.10    0.20
  -1   0  -2    0.30    0.20
  -1   0  -2    0.10    0.30
  -2   0  -2   19.70    1.90
   2   0   2   13.90    1.90
   2   0   2   17.90    1.80
  -2   0  -2   12.30    1.70
  -3   0  -2   -0.20    0.50
  -3   0  -2    1.00    0.70
   3   0   2   -0.60    0.70
   3   0   2   -0.10    0.50
   4   0   2  208.38   19.20
   4   0   2  202.48   19.20
  -4   0  -2  213.08   19.60
   4   0   2  195.78   19.50
  -4   0  -2  169.48   19.40
  -5   0  -2   -0.40    1.10
   5   0   2    0.80    0.40
   5   0   2   -0.10    0.80
   6   0   2  116.29   10.80
   6   0   2   92.49   10.40
   6   0   2  102.19   10.40
  -6   0  -2  121.39   11.00
   7   0   2   -0.40    0.90
   7   0   2   -0.10    0.80
   7   0   2    1.10    1.30
  -7   0  -2   -1.20    1.60
   8   0   2  260.27   23.70
  -8   0  -2  219.78   24.30
   8   0   2  243.48   24.30
  -9   0  -2    0.70    2.20
   9   0   2   -1.70    1.80
  10   0   2  164.88   15.50
 -10   0  -2  126.59   15.30
  11   0   2    1.90    3.20
 -11   0  -2    2.70    3.50
 -12   0  -2  159.08   16.20
  12   0   2  130.49   16.10
 -12  -1   2  135.59   14.10
  12  -1  -2  106.69   14.30
 -12   1   2  140.89   14.40
  12   1  -2  114.29   14.30
  11  -1  -2   36.00    5.10
 -11  -1   2   29.00    5.10
 -11   1   2   33.50    5.00
  11   1  -2   27.40    5.00
 -10  -1   2  185.48   20.60
  10  -1  -2  239.58   21.10
  10  -1  -2  203.78   20.50
  10   1  -2  219.88   20.70
  10   1  -2  188.38   20.40
 -10   1   2  184.88   20.70
  -9  -1   2   42.00    5.70
   9  -1  -2   37.50    5.50
   9  -1  -2   46.60    5.50
   9   1  -2   40.10    5.30
   9   1  -2   51.39    5.60
  -9   1   2   46.20    5.70
   8  -1  -2  377.06   37.80
  -8  -1   2  360.76   37.90
  -8   1   2  400.86   37.90
   8   1  -2  401.26   37.80
   7  -1  -2  256.17   24.20
  -7   1   2  221.58   24.20
   7   1  -2  263.47   24.20
   7   1  -2  236.88   24.10
   6  -1  -2  997.90  102.19
   6  -1  -2 1068.89  102.19
   6   1  -2 1150.98  102.29
   6   1  -2 1094.79  102.19
   6   1  -2 1011.30  102.19
  -6   1   2 1063.69  102.19
  -6   1   2  995.10  102.19
   5  -1  -2  251.37   26.70
   5  -1  -2  316.87   26.70
  -5  -1   2  263.37   26.70
   5   1  -2  286.27   26.80
   5   1  -2  246.88   26.70
   4  -1  -2 1793.92  177.38
   4  -1  -2 1757.72  177.38
   4  -1  -2 1772.42  177.38
  -4  -1   2 1829.82  177.38
   4   1  -2 2162.08  177.38
   4   1  -2 1799.72  177.38
  -4   1   2 1847.92  177.38
   4   1  -2 1717.23  177.38
  -3  -1   2  166.08   14.30
   3  -1  -2  135.99   14.40
   3  -1  -2  144.69   14.30
  -3  -1   2  145.79   14.40
   3  -1  -2  149.79   14.30
   3   1  -2  135.99   14.40
  -3   1   2  154.18   14.40
  -3   1   2  151.38   14.30
   3   1  -2  154.68   14.30
  -3   1   2  122.89   14.30
   2  -1  -2 3313.47  313.77
   2  -1  -2 3148.89  313.77
  -2  -1   2 3253.17  313.97
  -2   1   2 3388.66  313.87
  -2   1   2 3218.38  313.67
  -2   1   2 3157.38  313.97
  -1  -1   2  414.26   39.30
   1  -1  -2  418.56   39.40
   1  -1  -2  359.06   39.30
  -1   1   2  360.76   39.40
   1   1  -2  409.66   39.30
   1   1  -2  430.06   39.40
   1   1  -2  424.36   39.40
  -1   1   2  420.56   39.30
  -1   1   2  452.25   39.40
   1   1  -2  379.86   39.40
   0  -1   2 1325.87  125.69
   0  -1  -2 1331.17  125.69
   0  -1   2 1283.57  125.69
   0  -1  -2 1475.25  125.89
   0  -1   2 1407.16  125.79
   0   1  -2 1317.57  125.69
   0   1  -2 1279.17  125.79
   0   1  -2 1253.77  125.69
   0   1   2 1212.28  125.69
   0   1   2 1130.19  125.69
   1  -1   2 1211.48  120.49
  -1  -1  -2 1148.19  120.49
  -1  -1  -2 1320.37  120.59
  -1   1  -2 1240.78  120.49
   1   1   2 1169.98  120.49
  -1   1  -2 1348.27  120.59
   1   1   2 1302.47  120.59
  -1   1  -2 1135.59  120.49
   1   1   2 1352.36  120.59
  -2  -1  -2 3232.48  306.67
   2  -1   2 3366.66  306.87
   2  -1   2 2677.13  306.57
  -2   1  -2 3170.78  306.67
   2   1   2 2898.41  306.67
   2   1   2 3574.44  306.97
  -2   1  -2 3311.47  306.57
   3  -1   2  309.17   35.50
   3  -1   2  400.66   35.20
  -3  -1  -2  306.47   35.40
   3  -1   2  373.36   35.40
  -3  -1  -2  390.26   35.60
   3   1   2  370.16   35.50
  -3   1  -2  378.86   35.20
   3   1   2  383.36   35.20
  -3   1  -2  341.77   35.50
   3   1   2  383.46   35.20
   4  -1   2 1728.93  185.08
   4  -1   2 1839.92  184.98
  -4  -1  -2 1943.51  185.18
  -4   1  -2 2307.87  185.08
  -4   1  -2 1759.22  184.78
   4   1   2 1880.01  184.98
   4   1   2 1939.51  185.18
  -5  -1  -2   63.29    6.60
   5  -1   2   59.89    6.30
   5  -1   2   60.29    6.00
   5   1   2   59.09    6.00
   5   1   2   63.39    5.90
  -5   1  -2   58.19    6.50
   5   1   2   54.19    6.30
   6  -1   2  451.65   43.50
   6  -1   2  429.56   43.10
   6  -1   2  464.85   43.10
  -6   1  -2  466.45   43.60
   6   1   2  398.76   43.10
   6   1   2  462.15   43.10
   7  -1   2  117.79   11.40
  -7  -1  -2  128.19   12.10
   7  -1   2  105.19   11.80
   7  -1   2  116.09   11.40
   7   1   2  114.99   11.80
   7   1   2  110.29   11.40
   7   1   2  116.99   11.40
  -8  -1  -2  202.98   22.40
   8  -1   2  224.18   21.80
  -8   1  -2  202.98   22.40
   8   1   2  224.78   21.80
   8   1   2  258.27   22.40
  -9  -1  -2   63.99    8.30
   9  -1   2   91.79    8.50
   9   1   2   77.29    8.30
  -9   1  -2   55.09    8.30
 -10  -1  -2  181.88   19.30
  10   1   2  188.88   19.20
 -10   1  -2  185.98   19.20
  11  -1   2   35.70    5.50
 -11  -1  -2   26.60    5.00
 -11   1  -2   30.40    5.20
  11   1   2   30.30    5.30
 -12  -1  -2  118.99   14.30
  12  -1   2  136.79   14.50
  12   1   2  107.39   14.30
 -12   1  -2  136.49   14.40
 -12  -2   2    7.80    4.10
  12  -2  -2   11.60    4.40
 -12   2   2    6.20    4.10
  12   2  -2    6.00    4.20
 -11  -2   2   -1.60    2.80
  11  -2  -2    5.70    3.00
 -11   2   2    1.60    3.00
  11   2  -2    0.90    3.10
  10  -2  -2   49.80    6.80
 -10  -2   2   49.10    6.90
  10  -2  -2   66.49    6.90
  10   2  -2   50.99    7.00
 -10   2   2   50.79    6.90
  10   2  -2   56.09    6.70
   9  -2  -2    1.40    1.70
  -9  -2   2    0.30    2.10
   9   2  -2    3.90    1.90
  -9   2   2    0.00    1.90
   9   2  -2    2.60    2.00
  -8  -2   2   17.30    3.00
   8  -2  -2   23.60    3.30
  -8   2   2   16.10    2.80
   8   2  -2   20.20    2.80
   8   2  -2   15.10    2.70
  -7  -2   2   23.20    3.50
   7  -2  -2   19.60    3.20
   7   2  -2   26.40    3.30
  -7   2   2   20.90    3.20
   7   2  -2   29.60    3.30
  -7   2   2   22.80    3.30
   6  -2  -2   27.60    3.40
  -6  -2   2   22.50    3.50
  -6  -2   2   28.70    3.60
   6   2  -2   26.70    3.20
   6   2  -2   32.20    3.40
   6   2  -2   26.00    3.70
  -6   2   2   24.60    3.50
  -6   2   2   28.40    3.30
  -5  -2   2   21.20    3.00
   5  -2  -2   21.10    3.10
   5  -2  -2   26.10    3.20
  -5  -2   2   28.80    3.20
   5  -2  -2   25.30    3.00
   5   2  -2   21.10    3.10
  -5   2   2   26.10    3.10
  -5   2   2   29.00    3.30
   5   2  -2   30.80    3.10
  -4  -2   2   12.10    1.70
   4  -2  -2   10.50    1.70
   4  -2  -2   10.60    1.60
  -4   2   2   10.80    1.70
  -4   2   2   15.50    1.80
  -4   2   2   14.60    1.80
   4   2  -2   11.50    1.80
   4   2  -2    9.30    1.70
   4   2  -2   16.30    1.80
   4   2  -2   14.90    1.60
   3  -2  -2   66.29    5.90
   3  -2  -2   50.79    5.90
  -3  -2   2   67.19    6.00
   3   2  -2   66.79    6.00
   3   2  -2   50.89    5.90
   3   2  -2   62.49    5.80
  -3   2   2   48.30    5.90
   3   2  -2   55.69    5.90
   2  -2  -2   37.70    3.30
   2  -2  -2   34.60    3.20
  -2  -2   2   36.40    3.10
   2  -2  -2   27.30    3.30
   2   2  -2   24.90    3.20
  -2   2   2   33.20    3.30
   2   2  -2   28.90    3.10
   2   2  -2   25.80    3.20
  -2   2   2   33.40    3.30
  -1  -2   2 1333.37  128.59
   1  -2  -2 1184.18  128.59
   1  -2  -2 1455.25  128.49
   1  -2  -2 1240.38  128.49
   1  -2  -2 1456.95  128.49
  -1  -2   2 1348.67  128.59
  -1   2   2 1233.08  128.59
  -1   2   2 1410.86  128.49
   1   2  -2 1295.97  128.59
   1   2  -2 1284.07  128.49
  -1   2   2 1392.16  128.59
   0  -2   2  927.01   89.89
   0  -2   2  863.01   89.89
   0  -2  -2  970.50   89.89
   0  -2   2  967.60   89.89
   0  -2  -2  805.32   89.89
   0   2  -2  995.90   89.99
   0   2  -2  923.31   89.89
   0   2   2  970.40   89.99
   0   2   2  903.11   89.89
   0   2  -2  979.20   89.89
   1  -2   2  316.87   31.10
   1  -2   2  315.17   31.10
  -1  -2  -2  320.97   31.20
   1  -2   2  354.96   31.10
  -1  -2  -2  292.17   31.10
  -1  -2  -2  316.07   31.10
  -1   2  -2  314.67   31.10
   1   2   2  354.16   31.20
  -1   2  -2  335.57   31.10
   1   2   2  298.67   31.10
   1   2   2  323.47   31.10
  -1   2  -2  307.87   31.10
  -2  -2  -2  274.87   30.20
  -2  -2  -2  309.87   30.00
   2  -2   2  334.27   30.00
   2  -2   2  312.97   30.10
  -2   2  -2  317.57   30.00
  -2   2  -2  313.37   30.20
   2   2   2  313.77   30.10
   2   2   2  339.17   30.00
   2   2   2  270.97   30.20
  -3  -2  -2  129.29   14.20
   3  -2   2  124.39   14.50
  -3  -2  -2  162.38   14.60
   3  -2   2  156.38   14.30
   3  -2   2  155.38   14.50
   3   2   2  128.29   14.50
   3   2   2  150.58   14.40
   3   2   2  141.39   14.20
  -3   2  -2  155.78   14.30
  -3   2  -2  166.98   14.60
   4  -2   2   79.09    8.20
  -4  -2  -2   81.49    8.40
   4  -2   2   86.19    8.00
   4   2   2   91.69    8.30
  -4   2  -2   65.59    7.90
  -4   2  -2   82.69    8.20
  -4   2  -2   67.09    8.30
   4   2   2   85.89    8.00
   4   2   2   89.19    8.50
   4   2   2   83.89    7.90
   5  -2   2   88.19    9.90
  -5  -2  -2   99.09   10.30
   5  -2   2  113.09   10.20
   5   2   2  100.29    9.80
  -5   2  -2  103.99   10.30
   5   2   2   94.29   10.10
   5   2   2  104.89    9.80
   6  -2   2   65.59    7.50
  -6  -2  -2   91.19    8.20
   6  -2   2   76.09    7.90
  -6   2  -2   81.29    8.10
   6   2   2   75.29    7.90
   6   2   2   63.79    7.40
  -6   2  -2   84.79    7.50
   7  -2   2   52.39    5.10
   7  -2   2   42.20    4.40
  -7  -2  -2   36.30    4.90
   7   2   2   36.50    4.20
   7   2   2   47.00    4.90
  -7   2  -2   34.40    5.00
   7   2   2   39.10    4.30
  -8  -2  -2   74.39    8.60
   8  -2   2   71.89    8.30
   8  -2   2   78.19    7.70
  -8   2  -2   71.19    8.50
   8   2   2   78.89    7.70
  -9   2  -2   17.00    3.60
   9   2   2   23.50    3.40
 -10  -2  -2   22.00    4.30
  10  -2   2   16.80    4.00
  10   2   2   30.80    4.30
 -10   2  -2   15.80    3.80
 -11  -2  -2   16.50    4.10
  11  -2   2   12.10    3.80
  11   2   2   15.90    3.90
 -11   2  -2   15.50    4.00
 -12  -2  -2    6.10    4.50
  12  -2   2    1.90    4.00
 -12   2  -2    7.50    4.60
  12   2   2   13.50    4.40
 -12  -3   2   27.80    5.60
  12  -3  -2   22.00    5.10
  12   3  -2   21.80    5.20
 -12   3   2   30.00    5.30
 -11  -3   2   56.99    8.80
  11  -3  -2   68.49    8.80
 -11   3   2   72.59    8.60
  11   3  -2   72.99    8.80
  10  -3  -2   47.30    6.00
 -10  -3   2   41.00    5.80
  10  -3  -2   41.60    5.80
 -10   3   2   37.00    5.70
  10   3  -2   38.40    5.90
  10   3  -2   40.60    5.70
  -9  -3   2  204.68   21.10
  -9   3   2  212.58   21.00
   9   3  -2  207.88   20.90
  -8  -3   2  192.98   21.20
  -8   3   2  211.88   21.10
   8   3  -2  206.38   21.00
  -8   3   2  250.67   21.10
   8   3  -2  195.28   21.00
  -7  -3   2  788.02   73.59
   7  -3  -2  779.92   73.59
   7   3  -2  802.52   73.49
  -7   3   2  655.13   73.39
   6  -3  -2  376.06   37.90
  -6  -3   2  404.96   38.00
   6  -3  -2  409.26   38.00
  -6  -3   2  405.26   37.90
   6   3  -2  388.76   37.90
  -6   3   2  359.46   37.90
   6   3  -2  373.56   37.80
  -5  -3   2  898.41   98.49
  -5  -3   2  862.41   98.29
   5  -3  -2 1155.78   98.49
   5  -3  -2 1003.80   98.49
   5   3  -2 1163.08   98.39
  -4  -3   2  146.59   12.40
   4  -3  -2  112.69   12.50
  -4   3   2  123.79   12.50
   4   3  -2  123.89   12.30
   4   3  -2  132.69   12.50
   4   3  -2  112.39   12.50
  -3  -3   2 1501.25  141.09
  -3  -3   2 1528.65  141.29
   3  -3  -2 1482.25  141.09
   3  -3  -2 1313.27  141.19
  -3   3   2 1603.24  141.09
   3   3  -2 1432.56  141.19
  -3   3   2 1409.96  141.29
   3   3  -2 1412.96  141.09
  -2  -3   2    3.00    0.70
  -2  -3   2    3.60    0.70
   2  -3  -2    1.90    0.60
  -2  -3   2    3.70    0.50
   2  -3  -2    2.40    0.70
  -2   3   2    1.90    0.60
   2   3  -2    3.50    0.80
  -2   3   2    4.00    0.80
   2   3  -2    4.60    0.80
   2   3  -2    4.10    0.50
   1  -3  -2 4068.39  407.06
  -1  -3   2 4788.52  407.16
   1  -3  -2 4905.21  407.06
  -1   3   2 4032.90  406.86
  -1   3   2 3690.23  406.86
   1   3  -2 3867.71  406.86
   1   3  -2 4130.69  407.26
   0  -3  -2 1573.14  166.48
   0  -3   2 1795.72  166.48
   0  -3  -2 1866.81  166.68
   0  -3  -2 1502.75  166.48
   0  -3   2 1842.82  166.58
   0   3   2 1710.43  166.48
   0   3   2 1807.02  166.58
   0   3  -2 1614.04  166.48
   0   3  -2 1765.62  166.48
   0   3  -2 1763.02  166.48
  -1  -3  -2 4107.79  385.86
   1  -3   2 4303.87  385.76
   1  -3   2 4054.29  385.86
  -1  -3  -2 4004.80  385.66
   1   3   2 4092.99  385.66
   1   3   2 4074.69  385.86
  -1   3  -2 3825.22  385.46
  -1   3  -2 3353.56  385.66
   1   3   2 4105.49  385.96
   2  -3   2   90.59    8.30
  -2  -3  -2   91.99    8.30
  -2  -3  -2   90.09    8.10
   2  -3   2   91.99    8.20
  -2   3  -2   84.29    8.30
  -2   3  -2   68.39    8.20
  -2   3  -2   73.39    8.20
   2   3   2   88.29    8.30
   2   3   2   71.09    8.30
   2   3   2   80.79    8.10
  -2   3  -2   82.19    8.20
  -3  -3  -2 2426.36  234.78
   3  -3   2 2533.95  234.78
  -3  -3  -2 2103.19  234.48
  -3   3  -2 2454.85  234.58
  -3   3  -2 2530.25  234.78
   3   3   2 2335.67  234.68
   3   3   2 2624.94  234.78
  -4  -3  -2  189.58   18.30
   4  -3   2  202.68   18.00
  -4  -3  -2  159.88   18.10
  -4   3  -2  186.88   18.30
   4   3   2  196.88   18.40
  -4   3  -2  171.48   18.10
  -4   3  -2  179.88   18.00
   4   3   2  188.98   17.90
   5  -3   2  842.72   86.69
  -5  -3  -2  976.90   87.09
   5   3   2  816.02   86.59
  -5   3  -2  783.62   86.59
   5   3   2  980.10   86.59
  -5   3  -2  907.91   86.99
   5   3   2  971.60   86.89
   6  -3   2  148.39   13.40
   6  -3   2  122.99   13.00
  -6   3  -2  148.79   13.50
  -6   3  -2  110.59   12.90
   6   3   2  150.08   13.30
   6   3   2  136.49   12.90
   6   3   2  116.19   12.90
   7  -3   2  419.76   38.90
  -7  -3  -2  400.96   39.40
  -7   3  -2  365.26   39.30
   7   3   2  369.36   38.80
   7   3   2  403.66   39.20
   7   3   2  435.86   38.80
  -8  -3  -2  110.49   11.70
   8  -3   2  125.89   11.70
   8   3   2   90.59   10.80
   8   3   2  123.99   11.50
  -9  -3  -2  134.19   15.50
   9  -3   2  135.29   15.60
   9   3   2  177.28   15.40
  -9   3  -2  140.19   15.40
 -10  -3  -2   18.30    4.40
  10  -3   2   26.70    4.50
  10   3   2   30.90    4.30
 -10   3  -2   19.80    3.90
  11  -3   2   94.29   11.40
 -11  -3  -2   83.29   11.10
 -11   3  -2   91.19   11.10
  11   3   2  105.49   11.20
 -12  -3  -2   36.10    6.40
  12  -3   2   48.90    7.00
 -12   3  -2   48.60    6.70
  12   3   2   34.80    6.90
 -12  -4   2   -0.40    4.10
  12  -4  -2    9.10    4.20
  12   4  -2    3.10    4.30
 -12   4   2    5.60    4.00
 -11  -4   2   20.10    4.70
  11  -4  -2   21.90    4.20
 -11   4   2   24.40    4.40
  11   4  -2   27.30    4.60
  10  -4  -2    3.80    2.50
 -10  -4   2   -3.90    2.20
 -10   4   2    2.30    2.40
  10   4  -2    4.30    2.60
  10   4  -2    3.50    2.40
  -9  -4   2   34.20    5.20
   9  -4  -2   40.70    5.20
   9   4  -2   33.40    4.90
   9   4  -2   42.50    5.00
  -9   4   2   32.50    5.00
  -9   4   2   36.90    4.90
  -8  -4   2    1.80    2.10
   8  -4  -2    1.70    1.60
   8   4  -2    1.40    1.40
   8   4  -2    1.90    1.40
  -8   4   2    0.20    1.40
  -8   4   2   -0.40    1.60
   7  -4  -2    1.60    1.50
  -7  -4   2    4.30    1.80
   7   4  -2    4.30    1.30
   7   4  -2    3.30    1.30
  -7   4   2    1.50    1.50
  -7   4   2    2.10    1.30
   6  -4  -2  111.49   11.70
  -6  -4   2  113.99   11.60
  -6  -4   2  112.09   11.80
   6  -4  -2  121.89   11.80
   6   4  -2  115.69   11.70
  -6   4   2  129.39   11.70
  -6   4   2  105.59   11.70
   5  -4  -2   39.20    4.30
  -5  -4   2   36.20    4.20
   5  -4  -2   38.80    4.20
  -5  -4   2   27.60    3.90
   5   4  -2   38.50    4.10
   5   4  -2   40.60    4.20
   5   4  -2   37.00    3.90
   4  -4  -2    9.30    1.60
  -4  -4   2   12.30    1.80
   4  -4  -2    8.30    1.50
   4  -4  -2   13.40    1.70
  -4  -4   2   11.10    1.50
  -4   4   2   12.10    1.70
   4   4  -2    9.10    1.60
  -4   4   2   10.70    1.70
  -4   4   2   11.10    1.60
   4   4  -2   12.10    1.40
  -3  -4   2   93.89   11.40
   3  -4  -2  113.69   11.30
  -3  -4   2  124.49   11.30
  -3  -4   2  123.49   11.60
   3   4  -2  114.09   11.30
  -3   4   2  107.49   11.50
   3   4  -2  122.39   11.50
  -3   4   2  123.69   11.30
  -2  -4   2    4.50    1.00
   2  -4  -2    5.20    1.00
   2  -4  -2    5.60    1.10
  -2  -4   2    5.90    1.00
  -2  -4   2    7.40    0.80
   2  -4  -2    7.60    0.80
   2   4  -2    8.10    0.80
  -2   4   2    8.10    1.20
  -2   4   2    7.10    1.20
   2   4  -2    7.40    1.10
  -1  -4   2    2.30    0.70
  -1  -4   2    4.90    0.50
  -1  -4   2    4.90    0.50
   1  -4  -2    2.70    0.70
   1  -4  -2    3.80    0.70
  -1  -4   2    3.80    0.70
   1   4  -2    4.10    0.80
  -1   4   2    8.00    1.00
  -1   4   2    3.80    0.80
   1   4  -2    3.10    0.70
   0  -4  -2    0.80    0.30
   0  -4   2    0.90    0.50
   0  -4   2    1.60    0.40
   0  -4   2    0.90    0.30
   0  -4  -2    1.10    0.40
   0  -4  -2    1.10    0.40
   0  -4  -2    2.40    0.60
   0   4  -2    1.20    0.40
   0   4   2    1.30    0.50
   0   4  -2    1.00    0.30
   0   4  -2    1.00    0.40
   0   4   2    2.20    0.40
   1  -4   2  201.78   20.90
  -1  -4  -2  210.88   20.90
  -1  -4  -2  216.28   20.90
   1  -4   2  210.58   21.00
   1  -4   2  213.88   20.90
   1   4   2  243.78   21.00
   1   4   2  212.68   21.00
  -1   4  -2  212.38   21.00
  -1   4  -2  210.88   20.90
   1   4   2  219.78   21.00
   2  -4   2   16.50    1.90
  -2  -4  -2   17.20    2.00
   2  -4   2   16.40    1.80
  -2  -4  -2   19.50    1.80
  -2  -4  -2   16.50    1.90
   2   4   2   16.80    1.80
  -2   4  -2   11.70    1.80
   2   4   2   15.10    1.90
   2   4   2   15.40    2.00
  -2   4  -2   17.70    1.80
  -2   4  -2   12.60    1.80
   3  -4   2   34.10    3.30
  -3  -4  -2   33.10    3.20
  -3  -4  -2   31.70    3.60
   3  -4   2   31.80    3.50
   3   4   2   21.20    3.50
   3   4   2   29.80    3.30
   3   4   2   33.30    3.20
  -3   4  -2   27.20    3.30
  -3   4  -2   30.00    3.50
  -3   4  -2   30.90    3.20
   4  -4   2    7.80    1.20
  -4  -4  -2    8.50    1.60
   4  -4   2    7.00    1.40
  -4  -4  -2    9.40    1.30
  -4  -4  -2   10.10    1.50
   4   4   2    9.80    1.30
  -4   4  -2    8.00    1.20
  -4   4  -2    6.60    1.30
   4   4   2    7.70    1.40
   4   4   2    8.40    1.60
  -4   4  -2    8.30    1.60
   5  -4   2  113.29   10.60
   5  -4   2   94.39   10.30
   5   4   2  108.39   10.50
   5   4   2   98.89   10.20
  -5   4  -2  109.59   10.20
  -5   4  -2   96.09   10.50
   6  -4   2    6.80    1.50
   6  -4   2    6.60    1.60
  -6  -4  -2   11.00    2.20
   6   4   2    8.90    1.30
  -6   4  -2    8.60    1.90
  -6   4  -2    8.30    1.30
   6   4   2    8.50    1.40
   6   4   2    8.30    1.60
   7  -4   2  187.98   16.20
   7  -4   2  149.19   15.70
   7   4   2  147.39   15.60
   7   4   2  142.79   15.60
  -7   4  -2  159.98   15.60
  -7   4  -2  141.49   16.00
   7   4   2  190.48   16.00
  -8  -4  -2    3.70    2.40
   8  -4   2    7.10    2.10
   8   4   2    7.30    1.40
   8   4   2    6.60    1.90
  -8   4  -2    5.10    2.10
  -9  -4  -2   75.49   10.30
   9  -4   2  107.09   10.40
   9   4   2  105.39   10.10
  -9   4  -2   78.09   10.10
 -10  -4  -2    8.20    3.40
  10  -4   2   16.20    3.60
 -10   4  -2   11.70    3.50
  10   4   2   19.10    3.50
 -11  -4  -2   18.80    4.30
  11  -4   2   22.70    4.70
 -11   4  -2   23.50    4.70
  11   4   2   19.70    4.70
 -12  -4  -2    3.20    4.40
  12  -4   2    2.90    4.50
 -12   4  -2    4.70    4.50
  12   4   2   -5.70    4.10
 -12  -5   2   21.70    5.50
  12  -5  -2   29.40    5.50
  11  -5  -2   92.39   10.90
 -11  -5   2   83.99   10.80
  11   5  -2  100.89   11.00
 -11   5   2   88.09   10.60
 -10  -5   2    9.70    3.70
  10  -5  -2   30.60    4.20
  10   5  -2   23.60    3.60
 -10   5   2   18.60    3.40
  10   5  -2   16.00    3.30
  -9  -5   2  282.07   29.00
  -9   5   2  289.57   28.60
  -9   5   2  267.07   28.60
   9   5  -2  290.87   28.60
   9   5  -2  312.17   28.60
   8  -5  -2   78.19    8.20
  -8  -5   2   89.79    8.60
   8   5  -2   62.39    8.00
   8   5  -2   81.39    8.00
  -8   5   2   60.69    7.90
  -8   5   2   80.69    8.10
   7  -5  -2  288.17   28.50
  -7   5   2  238.18   28.30
   7   5  -2  306.47   28.40
   7   5  -2  306.47   28.30
  -7   5   2  302.87   28.40
   6  -5  -2  142.79   13.70
  -6  -5   2  126.99   13.80
   6  -5  -2  119.39   13.60
  -6  -5   2  162.58   13.60
  -6   5   2  131.79   13.60
   6   5  -2  116.79   13.40
   6   5  -2  150.18   13.70
   5  -5  -2 1281.47  115.69
   5  -5  -2 1124.69  115.49
  -5  -5   2 1068.69  115.39
  -5  -5   2 1082.99  115.69
  -5   5   2 1265.17  115.69
   5   5  -2 1318.47  115.49
   5   5  -2 1215.18  115.59
   4  -5  -2  471.85   41.90
  -4  -5   2  458.05   41.90
  -4  -5   2  383.06   41.60
   4  -5  -2  355.66   41.80
   4  -5  -2  489.95   41.70
   4   5  -2  420.26   41.60
  -4   5   2  383.96   41.80
   4   5  -2  449.46   41.90
  -4   5   2  457.65   41.70
   3  -5  -2 1341.77  129.39
   3  -5  -2 1198.28  129.39
  -3  -5   2 1262.07  129.39
   3   5  -2 1355.16  129.39
   3   5  -2 1515.25  129.19
  -3   5   2 1350.36  129.39
   2  -5  -2 1286.27  108.29
  -2  -5   2 1202.08  108.29
  -2  -5   2  982.60  108.29
  -2  -5   2 1264.27  108.09
   2   5  -2  943.31  108.19
  -2   5   2 1005.30  108.29
   2   5  -2 1131.99  108.29
  -2   5   2 1134.09  108.29
  -1  -5   2 1856.31  203.58
  -1  -5   2 2209.58  203.58
   1  -5  -2 2269.57  203.58
   1  -5  -2 1834.32  203.68
   1   5  -2 2222.28  203.68
  -1   5   2 2253.57  203.68
   0  -5   2  108.39   10.80
   0  -5  -2   97.89   10.90
   0  -5  -2  115.59   10.70
   0  -5  -2  103.49   10.90
   0  -5   2  117.59   10.80
   0  -5   2  106.59   10.90
   0   5  -2  122.89   10.90
   0   5  -2   91.99   10.80
   0   5   2  127.79   10.80
   1  -5   2  888.81   87.09
  -1  -5  -2  971.60   87.09
   1  -5   2  775.22   87.09
   1  -5   2  905.71   87.09
  -1  -5  -2  788.72   87.09
   1   5   2  974.00   87.19
  -1   5  -2  920.21   87.19
  -1   5  -2  876.91   87.09
   1   5   2 1006.50   87.19
   2  -5   2   16.60    1.90
  -2  -5  -2   13.80    1.80
  -2  -5  -2   13.60    1.90
  -2  -5  -2   15.60    1.80
   2  -5   2   13.10    1.80
   2   5   2   15.90    1.80
  -2   5  -2   14.40    1.80
   2   5   2   14.40    1.80
  -2   5  -2   14.90    1.80
   2   5   2   13.80    2.00
  -2   5  -2   16.30    1.80
   3  -5   2 1343.07  128.79
   3  -5   2 1233.18  128.89
  -3   5  -2 1229.58  128.79
  -3   5  -2 1519.95  128.79
  -4  -5  -2  184.68   16.00
  -4  -5  -2  181.88   15.80
   4  -5   2  143.59   15.80
  -4  -5  -2  133.39   16.00
   4  -5   2  162.78   16.00
   4   5   2  163.68   15.90
  -4   5  -2  141.49   15.90
  -4   5  -2  157.98   16.00
  -4   5  -2  157.88   15.80
   4   5   2  180.88   15.80
   5  -5   2  761.92   68.79
  -5  -5  -2  747.03   68.79
   5  -5   2  649.54   68.49
  -5  -5  -2  689.03   68.49
  -5   5  -2  773.22   68.49
   5   5   2  606.44   68.39
   5   5   2  728.03   68.59
   6  -5   2   44.30    4.50
   6  -5   2   33.30    4.10
  -6  -5  -2   37.10    4.60
  -6   5  -2   40.50    4.50
  -6   5  -2   33.60    3.90
   6   5   2   32.40    3.90
   6   5   2   37.50    4.20
   6   5   2   34.90    4.00
   7  -5   2  378.46   34.70
  -7  -5  -2  381.36   34.80
   7  -5   2  399.36   34.40
   7   5   2  291.37   34.20
   7   5   2  368.16   34.50
   7   5   2  303.27   34.20
   8  -5   2    1.30    1.80
  -8  -5  -2    2.70    2.00
   8   5   2   -1.30    1.30
  -8   5  -2    0.20    1.90
   8   5   2   -1.10    1.60
  -8   5  -2    0.10    1.20
  -9  -5  -2  159.88   16.70
   9  -5   2  166.28   16.60
  -9   5  -2  150.68   16.50
 -10  -5  -2   12.90    3.60
  10  -5   2   18.50    4.00
  10   5   2   13.80    3.40
 -10   5  -2   17.40    3.70
  11  -5   2   70.59   10.00
 -11  -5  -2   84.49   10.30
 -11   5  -2   83.99    9.90
  11   5   2   76.99    9.90
 -12   5  -2   21.20    5.00
  12   5   2   14.50    5.10
  12  -6  -2    7.20    4.50
 -12  -6   2   -1.60    4.50
  11  -6  -2    7.40    3.50
 -11  -6   2   17.90    4.40
  11   6  -2   14.70    4.00
 -11   6   2   10.40    3.70
  10  -6  -2   20.90    4.00
 -10  -6   2   19.00    4.10
  10   6  -2   23.30    3.80
 -10   6   2   21.30    3.70
 -10   6   2   22.40    3.70
  10   6  -2   20.90    3.90
  -9  -6   2    1.40    2.80
   9  -6  -2    2.80    2.30
  -9   6   2    2.50    2.10
   9   6  -2    4.70    2.10
  -9   6   2    1.20    2.00
   9   6  -2    2.90    2.10
   8  -6  -2    1.90    1.70
  -8  -6   2   -0.70    1.90
  -8   6   2    2.80    1.80
   8   6  -2    3.80    1.50
  -8   6   2    1.50    1.80
   8   6  -2    2.70    1.60
  -7  -6   2    3.60    1.70
   7  -6  -2    4.40    1.70
   7   6  -2    4.00    1.50
  -7   6   2    4.80    1.70
   7   6  -2    4.90    1.30
  -7   6   2    2.90    1.40
   6  -6  -2   29.00    4.00
   6  -6  -2   31.60    4.00
  -6  -6   2   32.40    4.10
  -6  -6   2   37.90    3.90
   6   6  -2   26.80    3.80
   6   6  -2   27.80    3.50
  -6   6   2   36.30    3.80
  -6   6   2   27.10    3.80
  -5  -6   2   10.80    2.10
  -5  -6   2   11.20    1.80
   5  -6  -2   16.00    2.30
   5  -6  -2   13.30    1.90
   5   6  -2   14.00    1.80
  -5   6   2   16.70    2.40
   5   6  -2   16.40    2.30
  -5   6   2   16.00    2.00
  -4  -6   2   16.40    2.50
  -4  -6   2   15.30    2.40
   4  -6  -2   19.00    2.40
   4  -6  -2   17.10    2.60
  -4  -6   2   18.90    2.00
   4   6  -2   20.60    2.40
   4   6  -2   14.70    1.90
  -4   6   2   17.60    2.50
   3  -6  -2  443.16   42.30
  -3  -6   2  432.36   42.00
  -3  -6   2  422.86   42.30
   3  -6  -2  427.86   42.30
  -3   6   2  439.06   42.30
   3   6  -2  446.96   42.30
  -3   6   2  431.26   42.40
  -3   6   2  492.95   42.10
  -3   6   2  449.16   42.00
   3   6  -2  354.76   42.20
  -2  -6   2   55.09    5.60
   2  -6  -2   47.80    5.70
  -2  -6   2   59.29    5.30
  -2  -6   2   58.39    5.30
   2   6  -2   58.29    5.70
  -2   6   2   47.10    5.60
   2   6  -2   47.40    5.60
  -1  -6   2   71.29    6.80
   1  -6  -2   69.99    6.80
  -1  -6   2   77.59    6.60
   1  -6  -2   64.69    6.50
  -1  -6   2   78.59    6.60
   1  -6  -2   55.09    6.80
  -1  -6   2   55.09    6.80
  -1   6   2   70.89    6.90
  -1   6   2   57.69    6.80
   1   6  -2   57.49    6.70
  -1   6   2   71.89    6.50
   0  -6  -2  102.39   10.50
   0  -6   2  107.69   10.50
   0  -6  -2  100.19   10.50
   0  -6  -2   97.09   10.30
   0  -6  -2  112.79   10.50
   0   6  -2   96.09   10.40
   0   6  -2  124.39   10.50
   1  -6   2   40.80    4.00
  -1  -6  -2   33.20    4.00
   1  -6   2   34.80    4.00
  -1  -6  -2   33.70    4.00
   1  -6   2   37.80    3.90
  -1  -6  -2   37.30    3.90
  -1   6  -2   43.40    4.00
   1   6   2   41.80    4.00
  -1   6  -2   32.20    3.90
   1   6   2   41.10    4.00
  -1   6  -2   41.60    4.00
  -2  -6  -2   58.39    6.70
  -2  -6  -2   63.59    6.80
   2  -6   2   65.99    6.80
   2  -6   2   82.39    6.90
  -2  -6  -2   55.99    6.80
  -2   6  -2   67.29    6.80
   2   6   2   67.79    6.80
   2   6   2   67.69    6.90
  -2   6  -2   66.49    6.80
   2   6   2   78.69    6.90
   3  -6   2  105.69    9.80
   3  -6   2   90.09    9.60
  -3  -6  -2   86.99    9.60
  -3  -6  -2  112.79    9.80
   3   6   2   86.59    9.60
   3   6   2  101.49    9.90
  -3   6  -2   86.19    9.60
  -3   6  -2  108.99    9.70
  -3   6  -2   82.99    9.70
  -3   6  -2  111.29    9.80
  -4  -6  -2   44.10    4.90
  -4  -6  -2   48.50    5.10
   4  -6   2   37.90    4.90
  -4  -6  -2   39.50    4.80
   4  -6   2   44.50    5.00
  -4   6  -2   56.29    5.00
  -4   6  -2   53.69    5.10
  -4   6  -2   45.40    4.80
   4   6   2   43.00    4.90
   4   6   2   51.49    4.90
  -5  -6  -2  122.09   12.20
  -5  -6  -2  102.09   11.80
   5  -6   2  124.19   12.10
   5   6   2  106.19   11.90
   5   6   2  128.99   11.80
  -5   6  -2  127.89   12.10
  -5   6  -2  123.89   12.00
   6  -6   2   26.00    3.70
   6  -6   2   30.50    3.80
  -6  -6  -2   25.30    3.90
  -6   6  -2   23.80    3.70
   6   6   2   28.20    3.50
  -6   6  -2   30.80    3.40
   6   6   2   29.30    3.30
   7  -6   2   13.90    2.30
   7  -6   2   11.40    2.40
  -7  -6  -2   12.20    2.50
   7   6   2   12.60    2.10
   7   6   2   10.70    2.10
  -7   6  -2    8.80    1.80
  -7   6  -2    9.10    2.20
  -8  -6  -2   28.20    4.40
   8  -6   2   23.50    3.90
  -8   6  -2   27.80    3.60
  -8   6  -2   24.20    3.90
   8   6   2   34.50    4.20
   9  -6   2   63.49    7.50
  -9  -6  -2   61.69    7.70
  -9   6  -2   57.99    7.50
  10  -6   2   22.20    4.10
 -10  -6  -2   19.70    4.50
  10   6   2   20.20    3.70
 -10   6  -2   19.00    3.90
 -11  -6  -2   44.20    6.00
  11  -6   2   20.60    5.10
  11   6   2   28.80    5.00
 -11   6  -2   26.80    5.00
  12   6   2   13.40    5.10
 -12   6  -2   20.20    5.10
  11  -7  -2   48.70    7.40
 -11  -7   2   73.29    8.90
 -10  -7   2   99.19   12.50
  10  -7  -2  111.39   12.60
 -10   7   2  102.29   12.30
  10   7  -2  109.79   12.20
 -10   7   2  143.59   12.30
   9  -7  -2  110.59   10.20
  -9  -7   2   83.89   10.20
   9   7  -2   85.09    9.80
  -9   7   2   91.39    9.70
  -9   7   2   85.99    9.90
   9   7  -2   87.09    9.70
  -8  -7   2  139.29   15.80
  -8   7   2  152.18   15.60
   8   7  -2  134.89   15.50
   8   7  -2  185.78   15.50
  -8   7   2  149.59   15.50
   7  -7  -2  112.39    9.90
  -7  -7   2   78.99    9.80
   7   7  -2   98.79    9.40
   7   7  -2   73.29    9.50
  -7   7   2   88.59    9.50
  -7   7   2  100.59    9.70
   6  -7  -2  277.57   27.20
  -6  -7   2  260.07   27.20
   6   7  -2  256.77   27.10
  -6   7   2  305.17   27.20
  -5  -7   2  881.51   80.79
   5  -7  -2  807.12   80.79
   5   7  -2  806.92   80.49
   5   7  -2  843.52   80.79
  -5   7   2  810.22   80.49
  -5   7   2  842.42   80.79
   4  -7  -2  628.24   60.49
  -4  -7   2  654.43   60.49
  -4   7   2  651.73   60.59
  -4   7   2  599.84   60.19
   4   7  -2  604.44   60.19
   4   7  -2  661.23   60.49
  -4   7   2  561.64   60.19
  -3  -7   2 1399.76  130.39
   3  -7  -2 1290.57  130.29
  -3  -7   2 1387.46  130.09
   3  -7  -2 1359.06  130.39
  -3  -7   2 1156.68  130.29
   3   7  -2 1371.76  130.09
   3   7  -2 1351.76  130.39
  -3   7   2 1545.15  130.09
  -3   7   2 1312.27  129.99
  -3   7   2 1284.07  130.39
   2  -7  -2  278.67   25.00
   2  -7  -2  287.47   25.10
  -2  -7   2  237.78   24.70
  -2  -7   2  280.77   24.70
  -2  -7   2  277.37   25.00
  -2   7   2  205.48   25.00
   2   7  -2  266.97   25.00
  -2   7   2  208.08   24.90
   1  -7  -2 1478.35  122.59
  -1  -7   2 1213.68  122.89
  -1   7   2 1169.78  122.79
   1   7  -2 1212.08  122.79
   0  -7  -2 1322.27  135.39
   0  -7  -2 1558.84  135.29
   0  -7   2 1501.35  135.39
   0   7  -2 1216.68  135.29
  -1  -7  -2  867.61   91.39
  -1  -7  -2  800.02   91.39
   1  -7   2  800.72   91.39
   1  -7   2 1041.10   91.39
   1  -7   2 1085.99   91.39
  -1  -7  -2 1092.49   91.39
  -1   7  -2  879.51   91.39
   1   7   2  940.41   91.39
   1   7   2 1076.99   91.59
  -1   7  -2  862.31   91.39
  -2  -7  -2  675.43   70.99
   2  -7   2  638.94   70.99
   2   7   2  857.01   71.19
  -2   7  -2  867.51   71.19
  -2   7  -2  666.43   70.99
   2   7   2  697.63   71.09
  -3  -7  -2  385.66   44.20
  -3  -7  -2  447.96   44.20
   3  -7   2  477.55   44.30
   3   7   2  493.05   44.20
   3   7   2  467.15   44.20
   4  -7   2  936.81   87.79
  -4  -7  -2  868.21   87.69
  -4   7  -2  976.60   87.79
   4   7   2  806.72   87.59
  -4   7  -2  934.81   87.69
   5  -7   2  204.58   18.50
  -5  -7  -2  159.38   18.30
   5   7   2  185.18   18.30
  -5   7  -2  187.98   18.40
   6  -7   2  538.25   50.29
  -6  -7  -2  517.35   50.59
  -6   7  -2  506.95   50.29
   6   7   2  502.95   50.39
  -7  -7  -2  131.19   13.60
   7  -7   2  129.19   13.50
   7   7   2  149.59   13.40
  -7   7  -2  110.29   13.40
  -7   7  -2  131.39   13.20
   7   7   2  131.69   13.10
   8  -7   2  332.77   33.20
  -8  -7  -2  328.37   33.30
  -8   7  -2  326.17   33.10
  -8   7  -2  333.57   32.70
   8   7   2  346.97   32.70
  -9  -7  -2   12.60    3.40
   9  -7   2   16.20    3.20
   9   7   2   15.40    3.10
  -9   7  -2   10.40    3.00
  10  -7   2   87.19   10.20
 -10  -7  -2   85.49   10.30
 -10   7  -2   84.99   10.10
  10   7   2   82.39    9.90
 -11  -7  -2    1.50    3.70
  11  -7   2    5.60    3.80
  11   7   2   -2.20    3.40
 -11   7  -2    2.30    3.70
 -11  -8   2    3.30    4.00
  11  -8  -2    5.80    3.40
 -10  -8   2   30.00    5.50
  10  -8  -2   35.90    5.50
  10   8  -2   42.00    5.80
  10   8  -2   36.30    5.30
 -10   8   2   35.80    5.30
   9  -8  -2    5.90    2.60
  -9  -8   2    7.10    3.10
  -9   8   2    9.30    2.60
   9   8  -2    4.30    2.40
   9   8  -2    6.50    2.20
  -9   8   2    4.70    2.20
   8  -8  -2   11.30    2.70
   8   8  -2    8.30    2.20
  -8   8   2    9.80    2.20
   8   8  -2    7.40    1.90
  -8   8   2    9.30    2.30
  -7  -8   2    6.60    2.30
   7  -8  -2    5.10    1.80
  -7   8   2    6.30    1.80
   7   8  -2    5.20    1.80
   7   8  -2    6.50    1.50
  -7   8   2    5.40    1.60
  -6  -8   2  140.49   15.20
   6  -8  -2  144.59   15.20
   6   8  -2  168.78   14.80
  -6   8   2  144.79   14.80
  -6   8   2  151.88   15.20
   6   8  -2  142.69   15.10
   5  -8  -2   16.00    2.40
  -5  -8   2   14.60    2.40
  -5  -8   2   12.30    1.90
   5   8  -2   13.60    2.20
   5   8  -2   14.80    1.90
  -5   8   2   16.50    2.10
  -5   8   2   13.80    2.00
  -5   8   2   15.90    2.50
  -4  -8   2    3.00    1.20
  -4  -8   2    0.70    0.70
   4  -8  -2    1.10    0.90
   4   8  -2    1.10    0.60
  -4   8   2    1.00    0.70
   4   8  -2    2.70    1.10
  -4   8   2    0.60    1.10
  -4   8   2    1.30    0.60
  -3  -8   2    0.80    0.50
   3  -8  -2    0.90    0.80
  -3  -8   2    1.80    1.00
  -3   8   2    1.30    0.50
  -3   8   2    1.40    0.40
   3   8  -2    1.00    0.90
  -3   8   2    0.40    1.00
  -2  -8   2    1.20    0.50
  -2  -8   2    0.90    0.50
  -2  -8   2    0.70    0.80
  -2  -8   2    0.80    1.10
   2  -8  -2    1.00    0.70
   2   8  -2    2.30    1.20
   2   8  -2    1.50    0.90
  -2   8   2    1.40    1.00
  -2   8   2    1.00    0.30
  -2   8   2    0.60    0.90
  -1  -8   2   86.39    8.40
   1  -8  -2   84.99    8.60
  -1  -8   2   96.59    8.80
  -1  -8   2   93.49    8.50
   1  -8  -2   72.29    8.30
   1  -8  -2   83.89    8.70
   1   8  -2   84.79    8.70
   0  -8  -2    0.80    0.90
   0  -8  -2    1.10    0.50
   0  -8   2    4.50    1.10
   0  -8   2    0.40    0.50
   0  -8  -2    0.50    0.90
   0   8  -2   -0.70    0.70
   0   8   2   -0.10    0.80
   0   8  -2    1.20    0.60
   0   8  -2    1.10    0.90
   0   8   2    0.70    0.60
   1  -8   2   57.49    5.10
   1  -8   2   49.20    5.10
  -1  -8  -2   43.90    5.30
  -1  -8  -2   60.39    5.10
  -1  -8  -2   40.90    5.20
  -1   8  -2   42.10    5.10
  -1   8  -2   50.19    5.10
   1   8   2   55.69    5.30
   1   8   2   46.40    5.20
   2  -8   2   47.00    4.50
   2  -8   2   47.20    4.80
  -2  -8  -2   37.30    4.60
  -2  -8  -2   44.70    4.60
   2   8   2   37.90    4.70
  -2   8  -2   35.80    4.50
   2   8   2   46.70    4.60
  -2   8  -2   48.60    4.70
  -3  -8  -2   69.79    7.50
   3  -8   2   77.89    7.60
   3  -8   2   75.99    7.60
  -3  -8  -2   79.49    7.60
   3   8   2   77.39    7.80
  -3   8  -2   54.49    7.50
   3   8   2   79.69    7.60
   4  -8   2  260.57   30.80
   4  -8   2  328.27   30.80
   4   8   2  301.27   30.70
   4   8   2  335.37   30.80
  -4   8  -2  322.87   30.80
  -4   8  -2  344.47   30.80
  -4   8  -2  307.87   30.80
  -5  -8  -2   14.50    2.40
  -5  -8  -2   13.20    2.20
  -5   8  -2   17.70    2.40
   5   8   2   10.80    2.00
  -5   8  -2   14.40    2.30
   5   8   2   16.90    2.30
  -6  -8  -2   64.69    7.10
   6  -8   2   60.79    7.00
   6   8   2   60.89    6.80
   6   8   2   68.59    6.70
  -6   8  -2   57.99    7.00
   7  -8   2    1.90    1.70
  -7  -8  -2   -0.40    2.00
   7   8   2   -0.40    1.30
  -7   8  -2   -1.10    1.40
   7   8   2    1.20    1.40
  -7   8  -2   -0.90    1.60
  -8  -8  -2   39.70    6.10
   8  -8   2   45.00    5.80
   8   8   2   56.79    5.70
   8   8   2   45.10    5.30
  -8   8  -2   33.80    5.40
  -8   8  -2   42.40    5.20
   9  -8   2    0.10    2.50
  -9  -8  -2    2.80    2.90
  -9   8  -2    7.10    2.70
   9   8   2    6.10    2.40
 -10  -8  -2   51.79    6.90
  10  -8   2   48.40    7.10
 -10   8  -2   36.10    6.10
  10   8   2   53.19    7.00
 -11  -8  -2   27.50    5.80
  11  -8   2   31.00    5.60
  11   8   2   21.40    5.10
 -11   8  -2   31.90    5.40
  11  -9  -2   15.00    4.10
 -11  -9   2   13.90    4.60
  10  -9  -2  221.28   22.20
 -10  -9   2  208.18   22.30
  -9  -9   2   38.80    5.70
   9  -9  -2   35.50    5.20
   9   9  -2   36.30    5.60
  -9   9   2   38.10    5.40
  -9   9   2   32.10    5.20
   9   9  -2   45.20    5.20
   8  -9  -2  347.27   35.60
  -8  -9   2  354.46   35.70
   8   9  -2  346.77   35.40
   8   9  -2  354.06   35.20
  -8   9   2  389.76   35.20
  -7  -9   2   34.40    4.70
   7  -9  -2   37.60    4.80
  -7   9   2   42.70    4.80
   7   9  -2   35.70    4.00
   7   9  -2   24.20    4.40
  -7   9   2   30.40    4.20
  -6  -9   2  855.11   73.19
   6  -9  -2  754.92   73.49
  -6   9   2  637.34   73.09
  -6   9   2  823.92   73.59
   6   9  -2  748.93   73.09
   6   9  -2  783.72   73.49
  -6   9   2  685.03   73.09
  -5  -9   2  197.18   21.00
  -5  -9   2  211.88   20.70
   5  -9  -2  200.48   21.00
  -5   9   2  205.38   20.60
  -5   9   2  204.58   20.60
  -5   9   2  242.48   21.20
   5   9  -2  196.68   21.00
   5   9  -2  229.68   20.60
  -4  -9   2 1098.19  106.39
  -4  -9   2 1017.10  106.09
  -4   9   2 1024.40  105.99
   4   9  -2  973.00  106.09
  -4   9   2 1165.28  106.09
  -4   9   2 1316.57  106.59
   3  -9  -2   73.09    7.00
  -3  -9   2   71.49    7.00
  -3  -9   2   59.19    6.60
  -3  -9   2   61.39    6.60
  -3   9   2   69.09    7.20
   3   9  -2   73.29    7.10
   2  -9  -2 1038.40  109.69
  -2  -9   2 1080.79  109.49
   2   9  -2 1194.08  109.79
  -2   9   2 1266.87  109.49
  -2   9   2 1194.88  109.89
  -2   9   2 1025.60  109.39
  -1  -9   2    4.80    0.90
   1  -9  -2    3.40    1.00
   1  -9  -2    4.60    0.70
  -1  -9   2    4.60    1.10
  -1  -9   2    5.70    0.90
  -1   9   2    4.70    0.80
   1   9  -2    6.50    1.40
   1   9  -2    4.60    1.20
  -1   9   2    3.40    1.20
  -1   9   2    5.30    1.30
   0  -9  -2 2111.69  187.18
   0  -9  -2 1833.92  186.88
   0  -9  -2 1883.91  187.08
   0  -9   2 1979.90  186.98
   0   9   2 1904.31  186.98
   0   9  -2 1988.00  186.98
   0   9   2 1847.02  187.18
   1  -9   2  100.29   10.40
  -1  -9  -2  105.79   10.40
  -1  -9  -2  108.79   10.60
  -1  -9  -2  105.69   10.50
  -1  -9  -2  120.09   10.70
   1   9   2   91.29   10.50
  -1   9  -2   99.89   10.60
   1   9   2  108.39   10.60
   2  -9   2 1284.97  122.19
  -2  -9  -2 1291.37  122.19
  -2  -9  -2 1241.28  122.09
   2   9   2 1318.67  122.29
  -2   9  -2 1175.48  122.19
  -3  -9  -2  152.98   16.00
   3  -9   2  169.88   16.20
  -3  -9  -2  155.48   16.10
  -3   9  -2  161.58   16.10
   3   9   2  164.18   16.10
   3   9   2  155.88   16.00
  -3   9  -2  173.28   16.00
   4  -9   2  815.62   79.29
  -4  -9  -2  851.11   79.19
  -4  -9  -2  806.32   79.19
   4   9   2  764.82   79.09
  -4   9  -2  788.42   79.19
   4   9   2  774.42   79.19
  -4   9  -2  866.61   79.09
  -4   9  -2  860.21   79.19
  -5  -9  -2    2.10    1.40
   5  -9   2   -0.50    1.10
   5   9   2    0.90    1.20
  -5   9  -2    0.80    1.30
   5   9   2    0.40    1.00
  -5   9  -2    0.80    1.30
  -6  -9  -2  472.25   44.10
   6   9   2  467.65   43.80
  -6   9  -2  406.06   43.90
  -7  -9  -2    0.60    2.00
   7  -9   2    1.20    1.70
   7   9   2    1.10    1.60
   7   9   2    0.50    1.40
  -7   9  -2    1.70    1.80
  -7   9  -2    1.20    1.80
   8  -9   2  305.07   30.70
  -8  -9  -2  297.07   30.80
   8   9   2  323.67   30.30
   8   9   2  320.47   30.50
  -8   9  -2  320.87   30.40
  -8   9  -2  275.27   30.50
   9  -9   2   34.80    5.10
  -9  -9  -2   29.70    5.10
  -9   9  -2   33.60    5.00
   9   9   2   37.80    5.10
 -10  -9  -2   74.29    9.70
  10  -9   2   76.79    9.70
  10   9   2   79.39    9.50
 -10   9  -2   75.49    9.50
  11  -9   2   11.90    4.40
 -11  -9  -2    8.50    4.20
  11   9   2    8.10    4.50
 -11 -10   2   13.50    4.80
  11 -10  -2   -3.30    4.00
 -10 -10   2   -1.60    3.50
  10 -10  -2   -0.10    3.30
 -10  10   2   -1.60    3.40
   9 -10  -2   15.40    3.40
  -9 -10   2   12.70    3.60
   9  10  -2   12.60    3.40
  -9  10   2   11.90    3.20
   8 -10  -2    4.30    2.20
  -8 -10   2    0.30    2.00
   8  10  -2    0.10    1.50
  -8  10   2    0.70    1.80
  -8  10   2    4.20    2.30
   8  10  -2    2.60    2.20
   7 -10  -2    3.50    2.10
  -7 -10   2   -1.30    1.60
   7  10  -2    1.00    1.20
   7  10  -2    2.10    1.80
  -7  10   2    0.20    1.90
  -7  10   2    0.60    1.40
  -6 -10   2    2.60    1.80
   6 -10  -2    5.20    1.70
  -6 -10   2    3.20    1.50
  -6  10   2    2.20    1.70
   6  10  -2    1.70    1.00
  -6  10   2    1.30    1.20
   6  10  -2    3.40    1.70
  -5 -10   2    3.50    1.60
  -5 -10   2    2.70    1.20
   5 -10  -2    4.60    1.50
   5  10  -2    2.80    0.90
  -5  10   2    1.80    1.50
  -5  10   2    1.90    1.00
  -5  10   2    2.80    0.90
   5  10  -2    1.60    1.50
   4 -10  -2   32.40    4.00
  -4 -10   2   30.30    4.00
  -4 -10   2   29.20    3.50
  -4  10   2   36.50    3.50
   4  10  -2   32.70    4.00
  -4  10   2   38.30    4.20
  -4  10   2   31.00    3.40
  -3 -10   2   19.50    2.40
  -3 -10   2   25.20    2.40
  -3 -10   2   25.00    3.00
   3  10  -2   26.60    3.10
  -3  10   2   18.20    2.20
  -3  10   2   19.90    2.30
  -3  10   2   22.10    3.10
  -2 -10   2  112.29   11.10
  -2 -10   2  121.39   10.80
   2 -10  -2  111.09   11.10
  -2 -10   2   91.59   10.80
  -2  10   2  109.19   11.20
   2  10  -2  114.69   11.20
  -1 -10   2    6.90    1.30
  -1 -10   2    6.10    1.20
   1 -10  -2    7.50    1.30
   1 -10  -2    6.90    1.00
  -1 -10   2    7.40    1.10
  -1  10   2    7.50    1.50
   1  10  -2    8.20    1.80
   1  10  -2    5.30    1.50
  -1  10   2    6.60    1.00
   0 -10  -2  273.37   26.70
   0 -10   2  300.77   26.90
   0 -10   2  235.08   26.80
   0 -10  -2  282.77   27.00
   0  10   2  305.67   27.20
   0  10  -2  225.88   26.80
   0  10  -2  281.57   27.10
   0  10  -2  303.87   27.00
  -1 -10  -2   38.30    4.10
  -1 -10  -2   38.80    4.20
   1 -10   2   37.20    4.00
  -1  10  -2   39.60    4.30
  -1  10  -2   33.10    4.20
   1  10   2   30.20    4.20
  -1  10  -2   43.30    4.30
   1  10   2   43.00    4.40
   2 -10   2  164.28   15.80
  -2 -10  -2  162.48   15.80
   2 -10   2  146.59   15.70
  -2  10  -2  149.88   15.90
   2  10   2  167.18   15.90
   2  10   2  160.78   15.90
  -2  10  -2  167.68   15.80
  -2  10  -2  157.78   15.80
   3 -10   2    4.10    1.20
  -3 -10  -2    3.80    1.30
  -3  10  -2    1.60    1.20
  -3  10  -2    5.60    1.40
   3  10   2    3.70    1.30
   4 -10   2  130.29   14.40
  -4 -10  -2  156.48   14.40
   4  10   2  169.08   14.50
  -4  10  -2  117.69   14.30
   4  10   2  140.59   14.30
  -4  10  -2  147.29   14.40
  -5 -10  -2    2.30    1.60
   5 -10   2    2.50    1.40
  -5  10  -2    0.90    1.40
   5  10   2    2.30    1.20
   5  10   2    1.20    1.30
  -5  10  -2    2.50    1.50
   6 -10   2   99.99   10.90
  -6 -10  -2   93.99   10.80
   6  10   2  112.49   10.70
   6  10   2   93.89   10.60
  -6  10  -2  100.39   10.80
  -6  10  -2  117.99   10.80
  -7 -10  -2    3.80    2.20
   7 -10   2    0.60    2.00
   7  10   2    0.60    1.50
   7  10   2   -0.60    1.70
  -7  10  -2    3.30    1.80
  -7  10  -2    0.20    1.80
   8 -10   2  103.89   11.80
  -8 -10  -2  135.09   12.10
   8  10   2   94.69   11.40
   8  10   2  110.69   11.40
  -8  10  -2  111.29   11.50
  -8  10  -2   98.09   11.60
  -9 -10  -2   46.80    6.70
   9 -10   2   44.20    6.30
  -9  10  -2   35.10    5.40
  10 -10   2   12.80    3.80
 -10 -10  -2   12.60    4.30
  10  10   2   11.70    3.90
 -10  10  -2   12.30    3.90
  11  10   2   -2.60    4.10
  10 -11  -2   59.49    9.00
 -10 -11   2   69.89    9.10
 -10  11   2   72.49    9.20
   9 -11  -2  104.79   11.40
  -9 -11   2  113.29   11.60
   9  11  -2   93.69   11.20
  -9  11   2   95.09   11.40
  -8 -11   2  138.19   15.00
   8 -11  -2  134.99   14.90
   8  11  -2  134.29   14.80
  -8  11   2  135.49   14.90
   8  11  -2  160.78   14.40
   7  11  -2  151.48   14.90
   7  11  -2  147.39   15.40
   6 -11  -2  113.19   11.40
  -6  11   2  116.29   10.80
   6  11  -2  100.99   11.30
   6  11  -2  101.99   10.80
  -5 -11   2  431.86   40.30
  -5  11   2  442.86   40.20
  -5  11   2  404.16   40.20
  -5  11   2  374.56   40.70
   4 -11  -2   92.49    9.90
  -4 -11   2   90.49    9.50
  -4 -11   2   97.99    9.50
   4  11  -2   82.49    9.90
  -4  11   2   81.79    9.30
  -4  11   2  109.89    9.40
  -4  11   2  119.49   10.20
   3 -11  -2  311.37   26.30
  -3 -11   2  260.47   25.80
  -3 -11   2  237.08   26.10
  -3  11   2  283.27   26.30
  -3  11   2  257.07   25.70
   3  11  -2  246.98   26.20
  -2 -11   2  421.56   39.10
  -2 -11   2  421.36   38.90
  -2 -11   2  374.36   38.90
  -2  11   2  334.77   38.70
   2  11  -2  442.86   39.30
  -2  11   2  417.66   39.30
   1 -11  -2  656.53   65.69
  -1 -11   2  738.93   65.89
  -1 -11   2  677.93   65.79
   1 -11  -2  751.12   65.99
  -1  11   2  577.44   65.69
   0 -11  -2  290.07   27.40
   0 -11  -2  271.97   27.20
   0 -11   2  282.07   27.30
   0  11  -2  300.57   27.60
   0  11   2  236.88   27.20
   0  11   2  299.97   27.60
   1 -11   2  828.12   75.29
  -1 -11  -2  743.03   75.29
  -1  11  -2  653.43   75.39
  -1  11  -2  818.92   75.29
  -1  11  -2  836.02   75.29
   1  11   2  778.72   75.49
  -2 -11  -2  275.57   26.20
  -2 -11  -2  259.47   26.10
   2 -11   2  234.78   26.00
   2 -11   2  272.87   26.20
   2  11   2  277.57   26.30
  -2  11  -2  273.47   26.10
   2  11   2  274.97   26.30
  -2  11  -2  266.17   26.30
  -3 -11  -2  636.34   63.09
   3 -11   2  649.04   63.19
   3  11   2  658.13   63.19
  -3  11  -2  653.73   63.19
  -3  11  -2  647.74   62.99
   4 -11   2  166.98   19.60
  -4 -11  -2  226.48   19.70
  -4  11  -2  191.08   19.60
   4  11   2  174.48   19.60
  -4  11  -2  199.78   19.70
   4  11   2  225.78   19.60
  -5 -11  -2  328.47   31.40
   5  11   2  321.07   31.30
  -5  11  -2  356.06   31.50
  -5  11  -2  274.37   31.30
   5  11   2  314.17   31.40
  -6 -11  -2  183.68   17.40
   6 -11   2  159.08   17.40
   6  11   2  173.18   17.30
   6  11   2  171.18   17.10
  -6  11  -2  166.88   17.30
  -6  11  -2  171.58   17.30
  -7  11  -2  211.98   20.80
  -7  11  -2  200.58   20.80
  -8 -11  -2   62.39    8.30
   8 -11   2   72.79    8.60
   8  11   2   63.29    7.90
  -8  11  -2   68.19    8.20
  -8  11  -2   64.99    8.40
   8  11   2   88.49    8.20
   9 -11   2   80.59    8.90
  -9 -11  -2   59.89    8.80
   9  11   2   57.19    8.30
  -9  11  -2   86.19    8.80
  10 -11   2   60.59    7.90
 -10 -11  -2   45.00    7.10
  10  11   2   41.00    6.40
 -10 -12   2    8.00    3.90
  10 -12  -2   14.80    4.20
 -10  12   2    7.20    4.20
  -9 -12   2    6.50    3.30
   9 -12  -2   -0.30    2.70
  -9  12   2    1.50    3.10
   9  12  -2   -4.10    2.90
  -8 -12   2   51.79    6.80
   8 -12  -2   54.99    6.80
   8  12  -2   45.50    6.70
  -7 -12   2    5.90    2.30
   7 -12  -2    7.70    2.50
   7  12  -2    8.90    1.70
   7  12  -2    3.80    2.30
  -7  12   2    5.70    2.50
   6 -12  -2   44.00    5.90
  -6 -12   2   60.59    6.20
  -6  12   2   52.29    5.30
   6  12  -2   37.40    6.00
  -6  12   2   51.49    6.20
  -5 -12   2   30.20    3.70
   5 -12  -2   21.00    3.20
  -5  12   2   22.60    2.70
  -5  12   2   25.30    3.60
   5  12  -2   16.80    3.20
  -4 -12   2   49.99    5.80
  -4 -12   2   65.29    6.50
   4 -12  -2   51.19    6.30
  -4 -12   2   52.29    5.90
  -4  12   2   69.09    6.70
  -4  12   2   65.99    5.70
   4  12  -2   46.10    6.40
  -3 -12   2   10.40    1.70
   3 -12  -2    8.00    1.80
  -3 -12   2   15.20    2.20
  -3 -12   2   12.50    1.80
   3  12  -2    9.50    2.20
  -3  12   2   10.50    2.40
  -3  12   2   10.30    1.50
   2 -12  -2   30.00    4.20
  -2 -12   2   34.40    4.00
  -2 -12   2   47.40    4.40
  -2 -12   2   42.60    4.20
  -2  12   2   36.90    3.90
   2  12  -2   33.50    4.50
  -2  12   2   36.70    4.60
  -1 -12   2   23.20    2.80
   1 -12  -2   18.50    2.20
  -1 -12   2   25.00    2.70
   1 -12  -2   23.40    2.80
  -1 -12   2   17.50    2.70
   1  12  -2   19.30    3.00
  -1  12   2   19.90    3.00
  -1  12   2   16.90    2.40
   0 -12  -2   10.50    1.70
   0 -12  -2   10.70    1.50
   0 -12   2    9.10    1.60
   0 -12   2   10.60    1.60
   0  12   2    8.60    1.70
   0  12  -2   10.30    2.00
   0  12  -2    8.90    1.60
   0  12   2   10.40    2.20
   1 -12   2   55.29    5.90
  -1 -12  -2   57.19    5.90
  -1 -12  -2   54.09    5.80
   1 -12   2   55.79    5.80
  -1  12  -2   66.09    6.30
   1  12   2   52.19    6.20
   1  12   2   51.19    6.10
  -1  12  -2   52.19    6.10
   2 -12   2    3.10    1.30
  -2 -12  -2    2.00    1.10
  -2 -12  -2    3.10    1.30
   2 -12   2    2.70    0.90
   2  12   2    0.80    1.30
  -2  12  -2    1.80    1.30
  -3 -12  -2   70.89    7.10
  -3 -12  -2   53.69    6.90
   3 -12   2   69.09    7.10
   3  12   2   79.49    7.30
  -3  12  -2   59.49    7.20
   4 -12   2   10.10    2.10
  -4 -12  -2    9.40    2.10
   4  12   2   13.70    2.40
  -4  12  -2   13.90    2.40
  -4  12  -2   14.10    2.20
   5 -12   2   26.70    4.20
  -5 -12  -2   38.00    4.20
   5  12   2   25.30    3.70
  -5  12  -2   26.50    3.90
   5  12   2   30.90    4.20
  -5  12  -2   32.90    4.30
   6 -12   2   21.90    3.60
  -6 -12  -2   28.50    3.80
  -6  12  -2   22.30    3.60
   6  12   2   23.00    3.40
   6  12   2   21.20    3.50
  -6  12  -2   22.20    3.50
   7 -12   2   31.70    5.00
  -7 -12  -2   36.80    5.50
   7  12   2   41.50    4.90
  -7  12  -2   36.90    5.10
  -7  12  -2   38.00    5.40
   7  12   2   35.30    4.90
  -8 -12  -2   23.10    4.60
   8 -12   2   29.10    4.70
   8  12   2   27.60    4.20
  -8  12  -2   36.30    4.90
   8  12   2   37.60    5.30
  -8  12  -2   29.30    4.60
  -9 -12  -2   53.49    9.20
   9 -12   2   76.99    9.20
  -9  12  -2   87.19    9.20
   9  12   2   69.89    8.80
  10 -12   2    8.60    4.00
 -10 -12  -2   11.40    4.40
  10  12   2   12.00    4.10
 -10 -13   2    4.00    4.70
  10 -13  -2    8.20    4.10
 -10  13   2    2.20    4.40
   9 -13  -2  167.18   19.30
  -9 -13   2  161.98   19.30
  -9  13   2  186.58   19.40
   9  13  -2  223.28   19.60
  -8 -13   2    0.30    3.30
   8 -13  -2    5.00    2.70
   8  13  -2   -0.90    2.80
  -8  13   2    5.30    3.10
   7 -13  -2  329.77   30.90
  -7 -13   2  303.47   30.80
   7  13  -2  291.97   30.70
  -6 -13   2    3.40    2.30
  -6 -13   2    5.70    1.50
   6  13  -2    4.00    2.30
  -6  13   2    2.80    2.20
   5 -13  -2  414.56   46.50
  -5 -13   2  552.64   46.60
   5  13  -2  451.25   46.60
  -5  13   2  479.65   45.90
   4 -13  -2    9.00    2.00
  -4 -13   2    9.70    1.60
  -4 -13   2    9.90    1.80
  -4 -13   2    9.80    2.20
  -4  13   2    9.90    1.30
   4  13  -2    8.20    2.20
  -4  13   2    7.50    2.40
  -3 -13   2  586.24   54.19
  -3 -13   2  547.95   54.19
   3 -13  -2  525.25   54.59
  -3  13   2  596.74   54.79
   3  13  -2  525.65   54.69
  -3  13   2  571.14   54.09
   2 -13  -2    8.50    1.70
  -2 -13   2   11.20    1.80
  -2 -13   2   15.10    2.10
  -2  13   2    7.30    1.40
  -2  13   2    9.60    2.10
   2  13  -2    8.10    1.90
   1 -13  -2  714.03   75.29
   1 -13  -2  729.33   75.59
  -1 -13   2  808.02   75.49
  -1  13   2  894.21   75.99
  -1  13   2  781.52   75.39
   1  13  -2  751.32   75.79
   0 -13  -2   17.10    2.50
   0 -13   2   16.60    2.50
   0 -13   2   21.10    2.50
   0  13  -2   15.20    2.60
   0  13   2   14.90    2.70
   0  13   2   14.80    2.40
   1 -13   2  687.63   62.19
  -1 -13  -2  673.53   61.99
   1 -13   2  614.14   61.99
   1  13   2  595.34   62.39
   1  13   2  689.13   62.19
  -1  13  -2  572.64   62.29
   2 -13   2    6.50    1.60
  -2 -13  -2    7.30    1.70
   2 -13   2    8.20    1.50
  -2 -13  -2   10.30    1.80
  -2  13  -2    9.80    2.10
   2  13   2    6.90    1.90
   3 -13   2  550.14   51.19
  -3 -13  -2  584.44   51.19
  -3 -13  -2  424.86   51.09
  -3  13  -2  542.25   51.39
   4 -13   2   18.30    2.80
  -4 -13  -2   15.60    2.70
  -4  13  -2   18.30    2.70
   4  13   2   16.80    2.90
  -4  13  -2   12.70    2.70
   5 -13   2  248.98   26.00
   5  13   2  253.37   26.00
  -5  13  -2  280.07   25.90
  -6 -13  -2   26.10    3.90
   6 -13   2   20.80    3.70
   6  13   2   21.70    3.70
  -6  13  -2   23.10    3.60
  -6  13  -2   28.80    4.00
   6  13   2   26.30    3.70
   7 -13   2  241.58   21.70
   7  13   2  193.88   21.10
  -7  13  -2  192.58   21.30
  -7  13  -2  217.08   21.50
   7  13   2  215.08   21.40
  -8 -13  -2    6.60    3.20
   8 -13   2   10.90    3.40
   8  13   2   13.00    3.30
  -8  13  -2   13.90    3.40
   8  13   2    9.20    2.90
  -8  13  -2   16.40    3.80
  -9 -13  -2   31.70    6.30
   9 -13   2   54.79    7.30
   9  13   2   47.00    6.80
  10 -13   2    1.50    4.00
 -10 -13  -2   -1.20    4.30
 -10  14   2   17.90    5.20
   9 -14  -2   27.80    4.80
  -9 -14   2   15.40    4.50
   9  14  -2   19.00    4.80
  -9  14   2   22.90    4.80
   8 -14  -2    2.50    2.80
  -8 -14   2   -0.90    3.10
   8  14  -2   -3.00    3.00
  -8  14   2    2.60    3.20
   7 -14  -2   22.50    4.20
  -7 -14   2   28.60    4.50
   7  14  -2   23.10    4.40
  -7  14   2   33.20    4.80
  -6 -14   2    6.80    2.70
   6 -14  -2    4.90    2.10
   6  14  -2    3.00    2.40
   5 -14  -2   14.70    2.80
  -5 -14   2   20.20    3.20
   5  14  -2   11.40    3.00
  -5  14   2   17.10    3.20
   4 -14  -2   17.40    3.00
  -4 -14   2   23.50    3.20
   4  14  -2   15.20    3.00
  -4  14   2   18.20    3.40
  -3 -14   2    2.00    1.60
  -3 -14   2    3.80    1.60
   3 -14  -2   -0.20    1.30
  -3  14   2    0.90    0.90
   3  14  -2   -0.60    1.70
  -3  14   2   -0.70    1.50
  -2 -14   2    4.10    1.60
  -2 -14   2    8.40    1.90
   2 -14  -2    6.10    1.60
  -2 -14   2    6.10    1.20
  -2  14   2    6.40    2.00
   2  14  -2    6.90    2.00
  -2  14   2    5.30    1.30
  -1 -14   2   27.50    3.30
   1 -14  -2   22.70    3.40
   1 -14  -2   28.00    3.00
  -1 -14   2   30.30    4.00
  -1 -14   2   28.60    3.40
   1  14  -2   30.80    3.90
  -1  14   2   26.90    4.10
  -1  14   2   21.50    3.50
   0 -14   2    2.60    1.10
   0 -14  -2    2.10    1.20
   0 -14   2    3.00    1.20
   0  14   2    1.90    1.70
   0  14   2    1.50    1.50
   0  14  -2    3.50    1.70
  -1 -14  -2   13.00    2.30
   1 -14   2   10.80    2.20
   1 -14   2   16.80    2.40
  -1 -14  -2   19.00    2.50
   1  14   2   17.10    2.70
  -1  14  -2   14.20    2.60
   2 -14   2    3.50    1.60
   2 -14   2    3.40    1.10
  -2 -14  -2    2.10    1.30
  -2 -14  -2    3.70    1.50
   2  14   2    2.20    1.80
  -2  14  -2    4.30    2.00
  -3 -14  -2   60.29    6.20
  -3 -14  -2   53.49    6.10
   3 -14   2   53.29    6.20
   3  14   2   50.69    6.40
  -4 -14  -2    5.90    2.00
  -4 -14  -2    4.00    1.70
   4 -14   2    3.50    1.70
  -4  14  -2    4.20    2.10
   4  14   2    6.50    2.10
  -4  14  -2    4.30    1.80
   5 -14   2   66.79    8.30
  -5 -14  -2   75.09    8.20
  -5  14  -2   86.29    8.50
   5  14   2   70.09    8.40
  -5  14  -2   69.29    8.20
   6 -14   2   -0.20    2.30
  -6  14  -2    1.60    2.20
  -6  14  -2    1.30    2.50
   6  14   2    2.40    2.30
  -7 -14  -2   21.90    3.90
   7 -14   2   17.90    3.40
   7  14   2   12.80    2.80
   7  14   2   17.30    3.50
  -7  14  -2   13.60    3.30
  -7  14  -2   16.40    3.40
   8 -14   2    9.90    3.50
  -8 -14  -2    9.50    3.60
   8  14   2   14.50    3.00
   9 -14   2   23.20    4.60
  -9 -14  -2   11.90    4.20
  -9 -15   2   92.79   11.10
   9 -15  -2   88.09   10.60
   9  15  -2   87.39   10.90
  -9  15   2   68.79   10.90
   8 -15  -2   71.59    8.40
  -8 -15   2   57.29    8.60
  -8  15   2   56.29    8.30
   8  15  -2   62.79    8.60
   7 -15  -2   53.99    6.80
  -7 -15   2   46.50    6.90
   7  15  -2   44.20    6.90
  -7  15   2   53.99    7.40
  -6 -15   2  106.79   11.20
   6 -15  -2  103.69   11.00
   6  15  -2   91.49   11.10
   5 -15  -2   89.39    9.40
   5  15  -2   79.19    9.50
  -4 -15   2  210.38   18.10
  -4 -15   2  179.48   17.40
   4 -15  -2  150.38   17.90
  -4  15   2  189.38   18.30
   4  15  -2  157.18   18.00
  -3 -15   2  140.09   16.00
  -3 -15   2  182.78   16.50
   3 -15  -2  168.38   16.50
  -3  15   2  166.48   16.80
  -2 -15   2  311.57   27.70
   2 -15  -2  266.17   28.00
   2  15  -2  267.97   28.20
  -1 -15   2  196.08   16.70
   1 -15  -2  150.08   16.60
  -1 -15   2  170.98   16.50
   1 -15  -2  155.18   16.30
  -1  15   2  173.98   17.10
   1  15  -2  155.48   16.90
   0 -15   2  270.87   31.00
   0 -15   2  301.77   31.00
   0 -15  -2  324.87   30.90
   0  15   2  354.16   31.10
   0  15  -2  315.27   31.40
   0  15   2  338.17   31.50
  -1 -15  -2  135.79   15.80
   1 -15   2  139.59   15.80
   1 -15   2  178.28   15.70
   1  15   2  145.49   16.20
  -1  15  -2  196.88   16.40
  -2 -15  -2  230.18   24.30
   2 -15   2  251.77   24.40
  -2 -15  -2  288.07   24.30
   2 -15   2  221.08   24.10
   2  15   2  239.68   24.60
  -3 -15  -2  248.48   24.20
  -3 -15  -2  241.88   24.20
   3 -15   2  238.48   24.30
   3  15   2  246.28   24.50
  -4 -15  -2  117.59   11.90
   4 -15   2  111.29   12.00
  -4  15  -2  121.59   11.90
   4  15   2  106.19   12.20
  -5 -15  -2  136.89   14.20
   5 -15   2  127.29   14.30
   5  15   2  134.19   14.40
  -5  15  -2  171.88   14.70
  -5  15  -2  121.69   14.20
   6 -15   2   85.99   11.30
  -6 -15  -2  126.09   11.40
  -6  15  -2   92.29   11.50
   6  15   2   96.69   11.50
  -6  15  -2  120.69   11.40
  -7 -15  -2   57.19    7.50
   7 -15   2   68.99    7.90
   7  15   2   64.49    8.00
  -7  15  -2   45.80    7.60
  -8 -15  -2   67.09   10.30
   8 -15   2  104.69   10.80
  -8  15  -2   87.49   10.90
  -9 -15  -2   46.30    7.40
   9 -15   2   64.69    8.70
  -9 -16   2    6.80    4.90
  -9  16   2   10.00    4.70
   9  16  -2    4.20    4.90
   8 -16  -2   15.50    3.70
  -8 -16   2    0.70    3.60
  -8  16   2   -3.70    3.40
   8  16  -2    1.70    3.80
   7 -16  -2    2.50    2.80
  -7 -16   2    5.90    3.10
   7  16  -2    1.00    3.30
  -7  16   2    1.90    3.50
   6 -16  -2    4.90    2.40
  -6 -16   2    4.60    2.80
   6  16  -2    1.20    2.60
  -6  16   2    1.20    2.80
   5 -16  -2   12.60    2.80
  -5 -16   2   14.00    2.90
  -5  16   2   12.20    3.30
   5  16  -2    5.30    2.90
  -4 -16   2    8.70    1.80
  -4 -16   2   14.70    2.80
  -4  16   2    8.20    3.00
  -3 -16   2    2.90    2.00
   3 -16  -2    5.40    1.90
  -3 -16   2    4.00    1.30
  -3  16   2    3.40    2.60
   3  16  -2    5.50    2.30
  -2 -16   2    5.20    1.50
  -2 -16   2    5.30    1.90
   2 -16  -2    4.90    1.70
   2  16  -2    4.90    2.20
  -2  16   2    1.60    2.20
  -1 -16   2   -0.60    1.50
  -1 -16   2    2.90    1.40
   1 -16  -2    3.30    1.50
   1  16  -2    0.70    1.90
  -1  16   2    1.60    2.20
   0 -16  -2    0.50    1.20
   0 -16   2    1.50    1.40
   0 -16  -2    0.40    1.40
   0 -16   2    0.20    1.30
   0  16  -2    2.30    2.00
   0  16   2    2.60    2.00
   1 -16   2    4.70    1.40
  -1 -16  -2    5.80    1.70
   1 -16   2    4.60    1.70
  -1 -16  -2    4.10    1.60
   1  16   2    2.70    2.10
  -1  16  -2    7.40    2.40
  -2 -16  -2    2.20    1.70
   2 -16   2   -1.50    1.20
   2 -16   2    1.60    1.60
  -2 -16  -2   -1.40    1.50
   2  16   2    1.40    2.30
  -2  16  -2    2.00    2.10
  -3 -16  -2   15.60    2.60
  -3 -16  -2    6.30    2.10
   3 -16   2   11.80    2.50
   3  16   2   10.90    2.70
  -3  16  -2    9.00    2.60
   4 -16   2   46.80    5.90
  -4 -16  -2   46.50    5.80
  -4 -16  -2   48.00    6.00
  -4  16  -2   40.00    5.90
   4  16   2   41.80    6.40
  -4  16  -2   57.79    6.50
  -5 -16  -2    5.50    2.60
   5 -16   2    5.70    2.40
  -5 -16  -2    2.50    2.10
   5  16   2    4.90    2.80
  -5  16  -2    4.30    2.40
  -6 -16  -2   17.40    3.50
  -6 -16  -2   13.70    3.30
   6 -16   2   12.10    3.20
  -6  16  -2   11.80    3.60
  -7 -16  -2   13.90    3.40
   7 -16   2   20.50    4.00
  -7 -16  -2   13.10    3.80
   7  16   2    7.80    3.90
  -7  16  -2    9.90    3.70
   8 -16   2   21.10    4.70
  -8 -16  -2   11.30    4.30
  -8  16  -2   18.00    4.70
  -9 -16  -2   29.20    5.80
   8 -17  -2  211.28   22.20
   8  17  -2  212.38   22.50
  -7 -17   2    4.80    3.70
   7 -17  -2    7.70    3.30
   7  17  -2    0.90    3.50
  -7  17   2    5.20    3.80
  -6 -17   2  146.89   15.00
  -6  17   2  140.99   15.30
   6  17  -2  131.59   15.10
   5 -17  -2    5.10    2.40
  -5 -17   2    1.10    2.70
  -5  17   2    3.80    2.90
   5  17  -2    2.20    2.90
   4 -17  -2  188.68   20.10
   4  17  -2  203.98   20.40
  -4  17   2  200.88   20.50
  -3 -17   2   -1.30    1.40
  -3 -17   2   -3.20    2.00
   3 -17  -2   -0.80    1.80
   3  17  -2    1.30    2.10
  -3  17   2   -3.00    2.20
  -2 -17   2  332.57   33.70
   2 -17  -2  299.67   34.00
  -2 -17   2  402.76   34.00
  -2  17   2  392.16   34.60
   2  17  -2  303.77   34.20
  -1 -17   2   14.10    2.40
   1 -17  -2    9.20    2.10
  -1 -17   2   10.60    2.10
   0 -17   2  311.17   29.40
   0 -17  -2  292.97   29.10
   0 -17  -2  290.17   29.50
   0  17   2  298.67   30.20
  -1 -17  -2    7.80    1.90
  -1 -17  -2    4.10    1.80
   1 -17   2    7.60    1.80
   1 -17   2    5.70    1.80
   1  17   2    3.60    2.60
  -2 -17  -2  102.89   11.20
  -2 -17  -2  116.59   11.30
   2 -17   2  108.59   11.30
   2 -17   2  108.59   11.00
   2  17   2  100.69   11.90
   3 -17   2    0.20    1.90
  -3 -17  -2    4.20    2.10
  -3 -17  -2   -3.10    1.60
  -3  17  -2    1.60    2.30
   4 -17   2  153.88   16.00
  -4 -17  -2  155.98   16.00
  -4 -17  -2  166.58   15.90
   4  17   2  141.49   16.50
  -4  17  -2  153.88   15.90
   5 -17   2    2.70    2.50
  -5 -17  -2    0.80    2.50
  -5 -17  -2   -0.70    2.20
  -5  17  -2   -0.40    2.70
   5  17   2   -0.20    2.60
   6 -17   2  117.29   12.50
  -6 -17  -2  103.19   12.40
   6  17   2  113.59   12.70
  -6  17  -2  112.09   12.70
   7 -17   2   28.30    4.90
  -7 -17  -2   19.10    4.60
  -7  17  -2   22.30    4.60
   7  17   2   15.10    4.60
   8 -17   2  139.59   14.60
  -8 -17  -2  116.79   14.20
  -8  17  -2  121.09   14.80
  -8 -18   2    2.00    4.60
  -8  18   2   -8.80    4.30
   8  18  -2    2.90    4.80
  -7 -18   2    2.20    3.80
   7 -18  -2    3.40    3.60
  -7  18   2    1.60    4.10
   7  18  -2    5.40    4.20
  -6 -18   2   -5.50    3.00
   6 -18  -2   -2.50    2.80
  -6  18   2   -5.50    3.00
   6  18  -2   -2.40    3.40
   5 -18  -2    6.20    2.90
  -5 -18   2    0.30    2.90
  -5  18   2    4.70    3.20
   5  18  -2    3.70    3.40
  -4 -18   2   -1.40    2.40
   4 -18  -2   -2.90    2.20
   4  18  -2   -1.20    2.50
  -4  18   2   -2.40    3.00
  -3 -18   2    0.50    2.20
   3 -18  -2    1.70    2.20
  -3  18   2    0.30    2.70
   3  18  -2    4.70    2.60
  -2 -18   2    1.20    1.90
  -2 -18   2    1.50    1.70
  -2  18   2   -3.00    2.20
   2  18  -2    0.30    2.50
   1 -18  -2   -0.30    1.70
  -1 -18   2   -1.30    1.70
  -1 -18   2   -0.80    1.70
  -1  18   2   -1.80    2.50
   1  18  -2    5.20    2.40
   0 -18  -2   15.10    2.70
   0 -18   2   11.60    2.50
   0 -18   2   11.70    2.60
   0 -18  -2   18.20    2.30
   0  18  -2   13.70    3.20
   0  18   2   14.60    3.50
  -1 -18  -2   -1.30    1.70
   1 -18   2    0.50    1.60
   1 -18   2    1.50    2.00
  -1 -18  -2   -0.70    1.70
   1  18   2   -1.90    2.50
  -1  18  -2    3.30    2.40
  -2 -18  -2   -1.10    2.00
   2 -18   2    1.60    1.60
  -2 -18  -2    1.90    1.70
   2 -18   2    4.40    2.10
  -2  18  -2    1.50    2.50
   2  18   2    2.30    2.80
  -3 -18  -2    7.20    2.60
   3 -18   2    7.10    2.60
  -3 -18  -2    2.50    2.20
   3  18   2    6.60    3.10
  -3  18  -2    8.10    3.10
  -4 -18  -2   26.90    4.40
  -4 -18  -2   25.30    4.10
   4 -18   2   30.20    4.50
  -4  18  -2   40.60    5.30
   4  18   2   27.70    5.00
   5 -18   2    8.80    3.10
  -5 -18  -2    8.50    2.80
  -5 -18  -2    6.80    3.30
   5  18   2    9.70    3.60
  -5  18  -2    6.10    3.50
   6 -18   2   42.20    6.00
  -6 -18  -2   35.50    5.80
  -6  18  -2   43.80    6.50
   6  18   2   48.20    6.60
  -7 -18  -2   -1.00    3.90
   7 -18   2    2.40    3.60
   7  18   2    0.90    4.10
  -7  18  -2   -0.50    3.90
  -8 -18  -2    2.10    5.00
  -8  18  -2   19.90    5.50
   7 -19  -2   43.70    6.60
  -7 -19   2   37.10    6.60
  -7  19   2   41.70    6.90
   7  19  -2   38.80    6.60
  -6 -19   2   50.79    7.20
  -6  19   2   38.00    6.50
   5 -19  -2   28.70    4.70
  -5 -19   2   27.40    4.70
   5  19  -2   28.80    5.20
  -5  19   2   31.90    5.40
   4 -19  -2  121.59   14.50
  -4 -19   2  140.99   14.70
  -4  19   2  144.69   15.40
   4  19  -2  144.89   15.00
   3 -19  -2   65.79    8.60
  -3 -19   2   65.89    8.40
  -3  19   2   89.29    9.60
   3  19  -2   78.39    9.20
  -2 -19   2  169.18   18.50
   2 -19  -2  194.28   18.70
  -2  19   2  184.78   19.20
  -1 -19   2  113.89   11.90
  -1 -19   2  114.69   11.90
   1  19  -2  114.89   12.60
  -1  19   2  108.79   12.70
   0 -19   2  199.48   20.50
   0 -19   2  214.88   20.50
   0 -19  -2  195.28   20.60
   0  19  -2  211.88   21.20
   0  19   2  200.28   21.20
  -1 -19  -2   25.00    3.60
   1 -19   2   25.40    3.40
   1 -19   2   21.20    3.70
  -1 -19  -2   27.80    3.50
  -1  19  -2   22.80    4.50
   1  19   2   20.50    4.20
   2 -19   2   91.89    8.40
  -2 -19  -2   74.49    8.60
   2 -19   2   62.59    8.70
  -2 -19  -2   82.49    8.80
  -2  19  -2   82.29    9.50
   2  19   2   63.99    9.30
  -3 -19  -2   78.29    8.40
  -3 -19  -2   77.89    8.70
   3  19   2   66.19    9.40
  -3  19  -2   69.29    9.20
  -4 -19  -2  173.58   17.90
   4 -19   2  161.68   17.80
  -4 -19  -2  183.28   17.50
   4  19   2  159.68   18.20
  -4  19  -2  171.38   18.20
   5 -19   2  111.99   12.30
  -5 -19  -2  110.09   12.30
   5  19   2  119.29   13.20
  -5  19  -2   96.39   12.60
  -6 -19  -2   85.69   11.10
   6 -19   2  100.29   11.20
  -6  19  -2   62.19   11.60
   6  19   2  124.89   12.40
  -7 -19  -2   49.60    7.80
  -7  19  -2   51.99    8.20
   7  19   2   88.39   11.10
   6 -20  -2    3.60    3.90
  -6 -20   2    6.60    3.90
  -6  20   2   -0.70    4.40
   6  20  -2    5.60    4.30
  -5 -20   2   -1.60    3.40
   5 -20  -2    4.40    3.30
  -5  20   2   -1.10    3.90
   5  20  -2   -3.80    3.80
  -4 -20   2    1.40    3.10
   4 -20  -2    1.10    2.90
   4  20  -2    5.30    3.50
  -4  20   2    0.70    4.00
   3 -20  -2    0.10    2.70
  -3 -20   2   -0.60    2.70
  -3  20   2   -1.70    3.50
   3  20  -2    2.70    3.40
  -2 -20   2    5.10    2.70
   2 -20  -2    0.40    2.40
  -2  20   2    2.00    3.10
   2  20  -2    5.40    3.20
  -1 -20   2    2.90    2.50
   1 -20  -2    4.30    2.50
   1  20  -2   -1.50    2.90
  -1  20   2    1.50    3.30
   0 -20   2    3.80    2.40
   0 -20  -2   -1.40    2.20
   0 -20   2   -0.60    2.20
   0  20   2   -3.40    3.20
   0  20  -2    1.50    2.80
   1 -20   2   41.60    6.00
   1 -20   2   51.99    5.70
   1  20   2   38.20    6.50
  -1  20  -2   42.50    6.50
   2 -20   2   15.30    3.40
   2  20   2   16.20    4.20
  -2  20  -2   14.90    3.90
  -3 -20  -2    0.30    3.10
   3 -20   2    1.60    2.90
  -3  20  -2    4.30    3.30
   3  20   2    5.40    3.50
   4 -20   2   32.30    4.90
  -4 -20  -2   27.70    5.00
   4  20   2   32.10    5.70
  -4  20  -2   24.40    5.20
  -5 -20  -2   23.80    4.80
   5 -20   2   30.00    5.10
  -5  20  -2   20.00    5.30
   5  20   2   37.80    6.00
   6 -20   2   23.40    5.20
  -6 -20  -2   20.80    4.90
  -6  20  -2   12.60    5.40
   6  20   2   27.20    6.30
   5 -21  -2  191.28   18.40
  -5 -21   2  134.69   18.30
  -5  21   2  198.78   19.30
   5  21  -2  167.28   18.90
   4 -21  -2    5.30    3.20
  -4 -21   2   -1.60    3.20
   4  21  -2    6.80    4.10
  -4  21   2   -2.70    4.40
   3 -21  -2  129.49   13.30
  -3 -21   2  113.19   13.10
  -3  21   2  113.39   14.10
  -2 -21   2    7.70    3.20
   2 -21  -2    5.00    3.20
  -2  21   2    8.50    3.80
   2  21  -2    2.80    3.70
   1 -21  -2  169.38   17.70
   1  21  -2  160.98   18.20
  -1  21   2  179.58   18.50
   0 -21   2   29.20    4.20
   0 -21  -2   18.60    3.90
   0  21   2   20.30    4.60
   0  21  -2   20.90    5.00
  -1 -21  -2  105.59   11.80
  -1  21  -2  108.39   12.70
   1  21   2  109.69   12.80
   2 -21   2    1.40    3.10
  -2 -21  -2    3.00    2.60
   2  21   2   -0.30    3.60
  -2  21  -2   -0.70    3.40
   3 -21   2  149.59   15.70
  -3  21  -2  116.39   16.10
   3  21   2  174.08   16.70
   4 -21   2    1.50    3.60
  -4  21  -2    1.00    3.70
   4  21   2   -0.40    4.10
   5 -21   2  113.19   13.20
  -5 -21  -2  112.69   13.30
  -5  21  -2  104.59   13.80
   5  21   2  126.29   14.40
   4 -22  -2   11.40    4.20
  -4 -22   2    8.00    4.20
  -4  22   2    0.70    5.40
   4  22  -2   15.40    5.20
  -3 -22   2   14.00    4.00
   3 -22  -2    8.30    3.80
  -3  22   2   14.70    5.20
   3  22  -2    6.50    4.90
  -2 -22   2    6.00    3.40
   2 -22  -2   10.30    3.60
   2  22  -2    0.70    4.30
  -2  22   2    2.90    4.40
   1 -22  -2   12.00    3.50
  -1  22   2    9.80    4.30
   1  22  -2   14.10    4.70
   0 -22  -2    6.40    3.40
   0  22  -2   -0.10    3.80
   0  22   2   14.10    4.60
  -1 -22  -2   12.70    3.70
  -1  22  -2   12.60    4.30
   1  22   2   16.00    5.00
   2  22   2   13.20    4.70
  -2  22  -2   15.70    4.70
   3 -22   2   14.90    4.50
   3  22   2    7.20    4.80
  -3  22  -2   16.00    4.80
   4 -22   2    6.90    4.20
   4  22   2   13.50    4.90
  -4  22  -2    2.30    4.60
   3 -23  -2   36.80    6.00
   2 -23  -2   17.30    4.70
   1 -23  -2   72.79    9.40
   1  23  -2   59.99    9.70
   0 -23  -2   42.20    6.10
   0  23  -2   40.10    7.10
   0  23   2   36.80    6.90
   1  23   2  130.19   15.60
   2  23   2   18.90    6.20
  12   0  -3   -5.60    3.90
 -12   0   3    0.60    3.90
 -11   0   3   87.19   10.40
  11   0  -3   88.89   10.40
  10   0  -3    4.00    2.40
  10   0  -3   -3.00    2.40
   9   0  -3  251.77   24.50
  -9   0   3  238.18   24.60
  -8   0   3   -1.20    1.40
   8   0  -3    1.10    1.50
   8   0  -3    1.60    1.40
   7   0  -3  397.96   37.10
  -7   0   3  359.56   37.20
   6   0  -3    0.30    0.90
  -6   0   3    0.60    1.20
  -5   0   3  627.04   56.89
   5   0  -3  619.24   56.89
  -5   0   3  505.15   56.69
   5   0  -3  560.04   56.69
  -5   0   3  613.14   56.79
   4   0  -3    0.60    0.70
  -4   0   3   -0.40    0.60
   4   0  -3    0.10    0.60
   4   0  -3    0.00    0.70
  -4   0   3    1.30    0.90
   3   0  -3  601.54   63.59
  -3   0   3  680.93   63.49
  -3   0   3  726.63   63.59
  -3   0   3  616.04   63.49
   3   0  -3  717.83   63.49
   3   0  -3  592.84   63.49
  -2   0   3   -0.70    0.40
  -2   0   3    0.80    0.40
   2   0  -3    0.10    0.40
  -2   0   3    0.40    0.40
   2   0  -3    0.50    0.30
   2   0  -3    0.80    0.50
   1   0  -3 2783.22  277.87
  -1   0   3 3050.19  278.27
   1   0  -3 2799.02  277.87
   0   0   3    0.20    0.20
   0   0   3    0.10    0.30
   0   0  -3    0.50    0.30
   0   0  -3    0.10    0.30
   0   0   3    0.20    0.30
   0   0  -3    0.40    0.30
   1   0   3 3037.00  256.07
  -1   0  -3 2238.68  255.37
  -1   0  -3 2672.33  255.47
  -2   0  -3    0.00    0.40
   2   0   3   -0.10    0.50
  -2   0  -3    1.90    0.70
  -2   0  -3    0.30    0.20
   2   0   3    0.00    0.40
  -2   0  -3    0.10    0.20
  -3   0  -3  907.81   91.59
   3   0   3  985.90   91.79
   4   0   3    1.80    1.30
   4   0   3   -1.30    0.60
  -4   0  -3    1.40    1.00
  -4   0  -3   -0.20    0.80
   5   0   3 1356.36  133.69
  -5   0  -3 1405.26  133.89
  -6   0  -3    1.00    1.50
   6   0   3    0.00    1.00
  -7   0  -3  765.42   84.49
   7   0   3  971.30   84.59
   8   0   3   -0.20    1.70
  -8   0  -3    0.30    1.90
  10   0   3   -0.50    2.50
 -10   0  -3    5.00    2.80
 -11   0  -3  144.49   14.90
  11   0   3  121.59   14.60
 -12   0  -3    0.40    4.00
  12   0   3    3.60    4.20
 -12  -1   3   65.99    8.80
  12  -1  -3   60.49    9.40
 -12   1   3   79.89    9.00
  12   1  -3   51.99    8.20
  11  -1  -3  120.29   12.30
 -11  -1   3   99.39   12.20
 -11   1   3   94.49   12.10
  11   1  -3  120.99   12.40
 -10  -1   3   39.50    6.20
  10  -1  -3   49.00    6.20
 -10   1   3   45.20    6.00
  10   1  -3   42.80    6.10
  10   1  -3   43.50    6.10
   9  -1  -3  152.88   15.50
  -9  -1   3  139.29   15.50
  -9   1   3  144.69   15.40
   9   1  -3  140.89   15.40
   9   1  -3  171.08   15.40
  -8  -1   3   72.89    8.80
   8   1  -3   75.09    8.60
  -8   1   3   74.79    8.60
   8   1  -3   97.29    8.60
  -7  -1   3  573.04   49.99
   7  -1  -3  409.76   49.70
   7   1  -3  535.65   49.80
  -7   1   3  530.05   49.90
   6  -1  -3  363.36   37.10
   6   1  -3  359.56   37.10
  -6   1   3  389.16   37.20
  -6   1   3  387.76   37.20
   6   1  -3  402.66   37.20
  -5  -1   3  615.54   56.29
   5  -1  -3  610.74   56.29
   5  -1  -3  509.65   56.19
  -5   1   3  551.94   56.29
   5   1  -3  538.25   56.19
   5   1  -3  573.64   56.29
  -5   1   3  589.44   56.19
  -5   1   3  643.84   56.29
   4  -1  -3  206.28   21.10
   4  -1  -3  218.98   21.00
  -4  -1   3  236.28   21.00
   4   1  -3  194.68   21.00
  -4   1   3  217.28   21.00
   4   1  -3  210.18   21.10
  -4   1   3  216.48   21.00
   3  -1  -3  529.95   59.89
   3  -1  -3  585.64   59.99
   3   1  -3  695.63   59.89
  -3   1   3  622.94   59.99
   3   1  -3  608.74   59.99
  -3   1   3  572.64   59.99
   3   1  -3  619.54   59.89
  -3   1   3  714.13   59.89
  -2  -1   3  127.39   11.60
  -2  -1   3  117.19   11.60
   2  -1  -3  122.89   11.60
   2  -1  -3  111.59   11.60
  -2   1   3  114.19   11.70
  -2   1   3  117.79   11.60
  -2   1   3  120.39   11.60
   2   1  -3  115.99   11.60
  -1  -1   3  385.06   34.10
   1  -1  -3  298.17   34.10
   1  -1  -3  329.37   34.00
   1  -1  -3  375.66   34.10
   1   1  -3  398.66   34.00
  -1   1   3  347.37   34.10
   1   1  -3  375.86   34.00
  -1   1   3  389.26   34.00
   1   1  -3  316.17   34.10
   1   1  -3  296.67   34.00
   0  -1  -3  328.57   32.50
   0  -1   3  336.37   32.50
   0  -1  -3  363.16   32.50
   0  -1   3  323.57   32.50
   0  -1  -3  346.87   32.50
   0   1   3  343.17   32.50
   0   1  -3  305.87   32.50
   0   1  -3  372.66   32.50
   0   1  -3  322.27   32.40
   0   1   3  312.27   32.50
   0   1   3  332.67   32.50
   1  -1   3  497.55   50.09
  -1  -1  -3  560.94   49.99
  -1  -1  -3  519.55   50.09
  -1   1  -3  585.24   50.09
  -1   1  -3  462.35   49.99
   1   1   3  461.55   50.09
  -1   1  -3  463.05   50.09
   1   1   3  586.04   49.99
  -2  -1  -3  156.08   14.00
  -2  -1  -3  139.19   13.70
   2  -1   3  127.79   13.80
   2   1   3  155.48   13.90
  -2   1  -3  120.49   13.80
  -2   1  -3  151.28   13.70
  -2   1  -3  147.19   13.90
   2   1   3  133.09   13.90
  -3  -1  -3  159.18   16.90
   3  -1   3  176.78   17.10
  -3   1  -3  176.18   17.00
   3   1   3  180.38   17.10
   4  -1   3    2.80    1.00
  -4  -1  -3    2.40    0.90
  -4  -1  -3    2.50    1.10
   4  -1   3    4.90    1.30
   4   1   3    3.40    1.20
  -4   1  -3    3.30    1.10
  -4   1  -3    1.90    1.00
   4   1   3    4.10    1.00
  -5  -1  -3   74.79    9.30
   5  -1   3   90.09    9.20
   5   1   3  102.79    9.30
  -5   1  -3   89.99    9.40
  -6  -1  -3    0.00    1.40
   6  -1   3    3.50    1.20
   6   1   3    1.10    1.10
  -6   1  -3    2.50    1.40
   7  -1   3   35.20    4.30
  -7  -1  -3   25.40    4.20
   7   1   3   33.80    4.20
  -7   1  -3   33.20    4.60
   8  -1   3   15.10    2.90
  -8  -1  -3   14.30    3.00
  -8   1  -3   12.40    3.00
   8   1   3   19.60    2.90
  -9  -1  -3    8.90    3.10
   9  -1   3    8.00    2.60
  10  -1   3    7.70    3.10
 -10  -1  -3   16.00    3.20
  10   1   3   13.00    3.30
 -10   1  -3    9.10    3.40
  11  -1   3    0.90    3.20
 -11  -1  -3    1.30    3.40
 -11   1  -3    4.40    3.40
  11   1   3    1.40    3.30
  12  -1   3   10.50    4.70
 -12  -1  -3   11.20    5.00
  12   1   3   22.00    5.10
 -12   1  -3   16.60    4.80
 -12  -2   3    1.90    4.40
  12  -2  -3    9.00    4.20
 -12   2   3    3.80    4.10
  12   2  -3    5.00    4.20
  11  -2  -3   40.10    5.50
 -11  -2   3   27.80    5.30
  11  -2  -3   34.00    5.00
  11   2  -3   33.20    5.20
 -11   2   3   24.40    5.00
  10  -2  -3   71.19    8.00
  10  -2  -3   73.09    7.90
 -10  -2   3   53.19    7.70
 -10   2   3   61.59    7.70
  10   2  -3   63.39    7.90
  10   2  -3   65.39    7.90
  -9  -2   3   35.50    5.50
   9   2  -3   42.00    5.30
  -9   2   3   41.40    5.30
  -8  -2   3   58.49    7.40
   8  -2  -3   65.39    7.30
  -8   2   3   66.99    7.30
   8   2  -3   72.79    7.20
   8   2  -3   64.79    7.30
  -7  -2   3  199.58   21.60
   7   2  -3  201.68   21.50
  -7   2   3  260.77   21.60
  -7   2   3  207.28   21.50
   7   2  -3  213.58   21.40
  -6  -2   3  294.07   27.40
   6  -2  -3  298.47   27.30
  -6  -2   3  295.77   27.20
   6  -2  -3  263.47   27.20
  -6   2   3  256.17   27.20
   6   2  -3  263.47   27.10
   6   2  -3  271.97   27.30
   5  -2  -3  360.66   35.90
  -5  -2   3  381.16   36.00
   5  -2  -3  369.06   36.00
   5   2  -3  378.66   36.00
   5   2  -3  378.96   36.00
  -5   2   3  354.06   36.00
  -5   2   3  366.26   36.00
   5   2  -3  357.86   35.80
  -4  -2   3  584.94   53.09
   4  -2  -3  514.35   52.89
   4  -2  -3  478.15   52.99
   4   2  -3  524.65   52.89
  -4   2   3  622.04   52.99
   4   2  -3  513.45   52.99
  -4   2   3  626.84   53.09
  -4   2   3  505.25   52.99
   3  -2  -3  577.14   54.29
   3  -2  -3  587.04   54.19
  -3  -2   3  585.74   54.29
   3   2  -3  583.24   54.19
   3   2  -3  473.35   54.29
   3   2  -3  518.65   54.29
  -3   2   3  540.35   54.29
  -3   2   3  611.74   54.19
   2  -2  -3 1271.27  117.19
  -2  -2   3 1336.87  117.29
  -2  -2   3 1178.18  117.19
   2  -2  -3 1333.87  117.29
  -2   2   3 1209.48  117.19
   2   2  -3 1013.90  117.29
  -2   2   3 1134.19  117.39
   2   2  -3 1094.89  117.29
   2   2  -3 1262.47  117.39
   2   2  -3 1297.47  117.19
   1  -2  -3  731.53   71.59
  -1  -2   3  663.03   71.69
   1  -2  -3  749.92   71.69
  -1   2   3  751.92   71.79
  -1   2   3  760.12   71.59
   1   2  -3  707.33   71.59
   1   2  -3  791.22   71.79
   1   2  -3  776.52   71.59
   0  -2   3  609.74   59.89
   0  -2   3  684.73   59.99
   0  -2   3  613.24   59.89
   0  -2  -3  678.13   59.89
   0  -2  -3  611.04   59.89
   0  -2  -3  603.54   59.89
   0   2  -3  593.44   59.89
   0   2   3  571.14   59.99
   0   2  -3  637.14   59.99
   0   2   3  591.54   59.89
  -1  -2  -3 1636.54  169.08
   1  -2   3 1907.11  169.08
   1  -2   3 1715.43  169.08
   1  -2   3 1800.42  169.08
   1   2   3 1522.55  169.08
   1   2   3 1873.61  169.38
  -1   2  -3 1748.03  169.08
  -1   2  -3 1883.31  169.08
   1   2   3 1666.03  169.08
   2  -2   3  759.82   67.79
  -2  -2  -3  604.34   67.69
  -2  -2  -3  701.33   67.59
   2  -2   3  690.23   67.69
   2   2   3  631.84   67.79
  -2   2  -3  768.22   67.89
   2   2   3  789.92   67.59
  -2   2  -3  595.64   67.69
  -2   2  -3  754.62   67.59
   3  -2   3  779.92   75.09
   3  -2   3  748.23   75.39
   3   2   3  844.62   75.09
  -3   2  -3  735.43   75.09
  -4  -2  -3  696.03   71.39
   4  -2   3  833.82   71.19
   4  -2   3  769.62   71.59
  -4  -2  -3  693.63   71.49
   4  -2   3  759.32   71.49
   4   2   3  718.43   71.39
  -4   2  -3  696.93   71.49
  -4   2  -3  701.93   71.09
   4   2   3  758.62   71.59
  -4   2  -3  730.93   71.39
  -5  -2  -3  569.94   50.19
   5  -2   3  467.35   49.90
   5  -2   3  450.95   49.60
  -5   2  -3  466.55   49.60
  -5   2  -3  590.54   50.19
   5   2   3  548.65   49.99
   6  -2   3  303.17   28.30
  -6  -2  -3  301.27   28.40
  -6   2  -3  249.88   28.30
   6   2   3  290.57   28.20
  -7  -2  -3  358.36   30.90
   7  -2   3  288.67   30.00
   7  -2   3  332.77   30.70
  -7   2  -3  265.87   30.60
   7   2   3  313.27   30.60
  -8  -2  -3  146.59   15.10
   8   2   3  145.39   14.80
  -8   2  -3  141.59   15.00
  -9  -2  -3  125.49   13.00
  -9   2  -3  115.09   12.90
  10  -2   3  110.29   11.40
 -10  -2  -3   91.59   11.30
 -10   2  -3   79.19   11.00
  10   2   3  117.59   11.30
  11  -2   3   60.79    9.10
 -11  -2  -3   77.19    9.60
 -11   2  -3   74.29    9.10
  11   2   3   66.29    9.10
  12  -2   3   84.19   10.20
 -12  -2  -3   52.49    8.60
 -12   2  -3   76.09    9.80
  12   2   3   68.89   10.30
  12  -3  -3   53.39    8.70
 -12  -3   3   65.39    9.40
 -12   3   3   79.69    9.40
  12   3  -3   91.09   10.20
  11  -3  -3    5.30    3.00
 -11  -3   3    8.90    3.70
  11   3  -3    3.90    3.40
 -11   3   3    1.30    3.30
 -10  -3   3   29.20    5.00
  10  -3  -3   43.70    5.30
  10   3  -3   31.70    4.60
  10   3  -3   26.90    4.50
 -10   3   3   31.80    4.60
   9  -3  -3   35.90    4.70
  -9  -3   3   30.00    4.50
  -9   3   3   27.80    4.00
   9   3  -3   25.10    4.10
   9   3  -3   32.80    4.60
  -8  -3   3  121.99   13.10
  -8   3   3  134.09   13.00
   8   3  -3  121.09   12.90
  -8   3   3  117.69   12.90
   8   3  -3  135.49   12.90
   7  -3  -3  158.08   13.70
  -7  -3   3  122.09   13.70
  -7   3   3  121.59   13.50
  -7   3   3  140.29   13.60
   7   3  -3  127.79   13.50
   6  -3  -3  330.77   32.20
   6  -3  -3  329.57   32.20
  -6  -3   3  358.26   32.10
  -6  -3   3  265.87   32.20
  -6   3   3  320.77   32.20
  -6   3   3  362.06   32.20
   5  -3  -3  247.48   26.20
  -5  -3   3  228.48   26.10
  -5  -3   3  293.87   26.30
   5   3  -3  288.17   26.30
   5   3  -3  267.97   26.10
  -5   3   3  252.97   26.30
  -5   3   3  296.67   26.20
   4  -3  -3  165.68   14.90
  -4  -3   3  162.48   14.90
  -4  -3   3  129.09   14.60
   4  -3  -3  155.28   14.80
   4  -3  -3  156.88   14.70
   4   3  -3  140.39   14.80
  -4   3   3  139.39   14.80
   4   3  -3  153.08   14.90
  -4   3   3  145.99   14.70
   4   3  -3  155.88   14.80
   4   3  -3  134.69   14.60
  -4   3   3  162.98   14.90
   3  -3  -3  386.56   36.30
   3  -3  -3  403.86   36.50
   3   3  -3  339.87   36.50
  -3   3   3  359.46   36.40
   3   3  -3  381.46   36.30
   2  -3  -3  453.25   42.00
  -2  -3   3  465.95   41.80
   2  -3  -3  446.66   41.80
  -2  -3   3  445.16   42.00
  -2   3   3  461.65   41.80
  -2   3   3  372.96   42.00
   2   3  -3  428.36   41.80
   2   3  -3  382.76   42.00
  -1  -3   3  334.87   34.80
   1  -3  -3  341.77   34.60
   1  -3  -3  298.97   34.70
   1   3  -3  380.36   34.80
  -1   3   3  397.76   34.90
   1   3  -3  396.56   34.60
   0  -3  -3 1401.56  126.39
   0  -3   3 1228.88  126.39
   0  -3   3 1453.85  126.49
   0  -3  -3 1179.08  126.39
   0  -3   3 1394.06  126.39
   0   3   3 1331.17  126.49
   0   3  -3 1363.16  126.29
   0   3  -3 1112.09  126.39
   1  -3   3  388.46   38.40
   1  -3   3  376.26   38.30
  -1  -3  -3  384.46   38.40
  -1  -3  -3  426.46   38.30
   1   3   3  375.06   38.40
   1   3   3  443.46   38.40
   1   3   3  418.06   38.40
  -1   3  -3  400.06   38.30
  -1   3  -3  336.67   38.30
  -1   3  -3  404.66   38.30
   2  -3   3  287.27   26.10
  -2  -3  -3  237.98   26.10
  -2  -3  -3  300.97   26.00
  -2   3  -3  259.97   26.10
   2   3   3  240.48   26.20
  -2   3  -3  299.57   26.00
   2   3   3  243.68   26.10
  -3  -3  -3    2.00    0.70
   3  -3   3    1.40    0.50
  -3   3  -3    0.00    0.60
   3   3   3    0.40    0.90
   3   3   3    0.60    0.40
  -3   3  -3    0.60    0.60
  -3   3  -3    1.80    0.50
  -4  -3  -3  171.88   16.70
   4  -3   3  161.78   17.00
   4  -3   3  182.08   16.80
  -4   3  -3  159.88   16.70
  -4   3  -3  192.38   17.20
   4   3   3  179.88   16.70
   4   3   3  156.78   17.00
   5  -3   3   29.90    3.50
  -5  -3  -3   27.00    4.10
   5  -3   3   38.10    4.00
   5   3   3   38.30    3.40
   5   3   3   27.60    3.40
  -5   3  -3   35.40    3.50
   5   3   3   36.10    3.90
  -5   3  -3   38.80    4.20
   6  -3   3   80.99    7.40
   6  -3   3   65.79    6.80
  -6  -3  -3   84.89    7.70
   6   3   3   79.39    7.30
  -6   3  -3   55.29    7.40
  -6   3  -3   63.19    6.80
   6   3   3   62.59    6.70
   7  -3   3   10.30    1.50
   7  -3   3    8.20    2.10
  -7  -3  -3   12.80    2.60
   7   3   3   12.50    2.20
  -7   3  -3    7.80    2.30
  -8  -3  -3    5.20    2.30
   8  -3   3    5.20    1.20
   8  -3   3    5.30    2.10
  -8   3  -3    4.20    2.30
   8   3   3    6.70    1.90
   9  -3   3    5.60    2.70
  -9  -3  -3   10.60    2.80
   9   3   3    8.40    2.60
  -9   3  -3    3.10    2.60
  10  -3   3    1.70    2.90
 -10  -3  -3    1.90    3.30
 -10   3  -3    1.20    2.90
  10   3   3    2.30    2.70
  11  -3   3    5.80    3.70
 -11  -3  -3    2.80    3.70
  11   3   3    4.40    3.80
 -11   3  -3    7.60    3.60
 -12  -3  -3   -0.80    4.90
  12  -3   3   -1.30    4.50
  12   3   3    4.60    4.40
 -12   3  -3    0.20    4.10
 -12  -4   3   56.79    7.90
  12  -4  -3   39.90    6.60
  11  -4  -3   -3.50    2.90
 -11  -4   3    0.00    3.50
 -11   4   3   -1.00    3.20
  11   4  -3    2.90    3.30
 -10  -4   3   78.69    8.80
 -10   4   3   67.69    8.40
  10   4  -3   70.29    8.40
  10   4  -3   70.19    8.50
   9  -4  -3    6.30    2.50
  -9  -4   3   10.00    3.10
  -9   4   3    8.10    2.50
   9   4  -3    8.30    2.40
  -9   4   3   17.60    2.80
   9   4  -3   11.60    2.40
   8  -4  -3  131.69   14.00
  -8  -4   3  140.89   14.30
   8   4  -3  133.29   14.00
  -8   4   3  122.19   13.90
  -8   4   3  159.28   14.00
  -7  -4   3   96.29   10.30
   7  -4  -3  116.59   10.20
  -7   4   3   86.99   10.00
  -7   4   3   87.69   10.00
   7   4  -3   99.39   10.10
  -6  -4   3  507.75   55.09
   6  -4  -3  599.14   55.29
   6  -4  -3  504.85   55.29
   6   4  -3  634.04   55.19
  -6   4   3  589.14   55.39
   6   4  -3  573.24   55.29
   5  -4  -3   30.60    3.30
   5  -4  -3   22.20    3.30
  -5  -4   3   21.40    3.30
  -5  -4   3   27.80    3.20
  -5   4   3   31.00    3.40
   5   4  -3   24.40    3.00
  -5   4   3   34.50    3.20
   5   4  -3   27.60    3.30
   4  -4  -3  635.34   58.59
   4  -4  -3  579.24   58.69
  -4  -4   3  656.83   58.59
   4  -4  -3  591.64   58.79
  -4   4   3  598.84   58.79
   4   4  -3  591.34   58.69
  -4   4   3  557.14   58.79
  -4   4   3  619.04   58.59
   4   4  -3  653.83   58.79
   4   4  -3  634.94   58.79
   4   4  -3  533.55   58.49
  -3  -4   3  192.58   17.40
   3  -4  -3  181.48   17.10
   3   4  -3  175.08   17.00
  -3   4   3  154.18   17.30
   2  -4  -3 1567.14  132.99
  -2  -4   3 1211.78  132.99
  -2  -4   3 1501.15  132.99
   2   4  -3 1420.76  132.99
  -2   4   3 1176.48  132.99
   1  -4  -3   52.09    4.90
   1  -4  -3   56.79    4.90
  -1  -4   3   50.49    5.10
  -1  -4   3   48.30    5.20
   1  -4  -3   48.10    5.10
  -1   4   3   45.70    5.10
  -1   4   3   57.99    5.30
   1   4  -3   51.19    5.20
   1   4  -3   42.50    5.10
   0  -4  -3 2424.56  245.88
   0  -4   3 2642.34  245.78
   0   4  -3 2884.01  245.88
   0   4  -3 2229.48  245.78
  -1  -4  -3    7.40    1.20
  -1  -4  -3    8.40    1.20
   1  -4   3    7.30    1.10
   1  -4   3    8.20    1.10
   1  -4   3    7.80    1.20
  -1  -4  -3    7.90    1.20
   1   4   3    7.50    1.20
   1   4   3   10.10    1.30
  -1   4  -3    6.70    1.10
  -1   4  -3    8.40    1.10
   1   4   3   10.50    1.20
  -1   4  -3    7.00    1.10
   2  -4   3 2588.94  223.78
  -2  -4  -3 2352.66  223.68
  -2  -4  -3 2295.87  223.88
   2  -4   3 2651.73  223.78
  -2   4  -3 2426.56  223.68
  -2   4  -3 1976.70  223.78
   2   4   3 2167.48  223.88
   2   4   3 2368.96  223.78
  -2   4  -3 2017.00  223.68
   3  -4   3   53.19    5.90
  -3  -4  -3   62.49    6.10
  -3  -4  -3   53.59    5.70
   3   4   3   64.79    5.70
  -3   4  -3   44.40    5.80
   3   4   3   66.49    5.90
   3   4   3   45.30    6.00
  -3   4  -3   62.19    5.70
  -4  -4  -3  792.22   82.39
   4  -4   3  915.01   82.39
   4  -4   3  954.00   82.09
  -4   4  -3  902.71   82.29
   4   4   3  904.91   82.09
   4   4   3  796.52   82.29
  -4   4  -3  729.03   82.09
  -4   4  -3  793.32   82.39
   5  -4   3    8.60    1.30
  -5  -4  -3    7.80    1.70
   5  -4   3    7.60    1.60
   5   4   3    7.50    1.40
  -5   4  -3    7.60    1.70
   5   4   3    8.40    1.30
  -5   4  -3    8.10    1.20
   6  -4   3 1099.89  107.89
  -6  -4  -3 1146.49  108.39
  -6   4  -3  970.20  107.79
   6   4   3 1113.99  107.79
   6   4   3 1281.47  108.29
   6   4   3 1092.09  107.79
   7  -4   3   24.60    3.40
  -7  -4  -3   21.50    3.60
   7  -4   3   23.20    2.90
   7   4   3   20.20    2.50
  -7   4  -3   17.00    3.20
   7   4   3   27.40    2.60
   7   4   3   20.90    3.20
  -7   4  -3   18.60    2.60
  -8  -4  -3  420.76   45.00
  -8   4  -3  425.26   45.00
   8   4   3  523.85   45.00
   9  -4   3   10.10    2.70
  -9  -4  -3   11.10    3.20
  -9   4  -3   12.00    3.00
   9   4   3   14.00    3.30
 -10  -4  -3  173.38   18.50
  10  -4   3  188.78   18.50
  10   4   3  173.88   18.20
 -10   4  -3  163.48   18.30
  11  -4   3   35.00    6.20
 -11  -4  -3   50.09    6.80
  11   4   3   42.00    6.30
 -11   4  -3   41.20    6.20
  12   4   3   58.89    8.40
 -12  -5   3  103.79   12.90
  12  -5  -3  117.49   13.00
  11  -5  -3    2.30    3.10
 -11  -5   3    2.20    3.90
 -11   5   3    2.40    3.40
  11   5  -3    9.40    3.70
 -10  -5   3  135.79   14.30
  10   5  -3  135.39   14.00
  10   5  -3  133.89   14.10
 -10   5   3  133.19   14.00
 -10   5   3  124.19   14.00
  -9  -5   3   19.40    3.70
  -9   5   3   30.80    4.30
  -9   5   3   22.10    3.60
   9   5  -3   26.00    3.60
   9   5  -3   20.20    3.50
  -8  -5   3  272.87   26.80
   8   5  -3  243.28   26.50
  -8   5   3  279.47   26.40
  -8   5   3  274.57   26.50
   7  -5  -3  147.69   14.90
   7   5  -3  161.38   14.70
   7   5  -3  154.68   14.80
  -7   5   3  121.59   14.60
  -7   5   3  147.89   14.90
  -6  -5   3  108.49   10.90
   6  -5  -3   93.19   10.70
  -6  -5   3   92.99   10.50
   6   5  -3  115.09   10.70
  -6   5   3  115.19   10.80
  -5  -5   3    5.00    1.20
   5  -5  -3    6.80    1.40
  -5  -5   3    6.00    1.60
   5  -5  -3    4.70    1.30
   5   5  -3    4.90    1.00
  -5   5   3    6.50    1.40
   5   5  -3    4.80    1.20
  -5   5   3    6.30    1.20
  -4  -5   3  510.75   46.90
   4  -5  -3  535.55   46.70
  -4  -5   3  437.46   46.60
   4  -5  -3  437.16   46.80
   4   5  -3  460.25   46.90
  -4   5   3  520.25   46.60
   4   5  -3  468.85   46.60
  -4   5   3  481.05   46.90
  -3  -5   3    4.30    1.00
  -3  -5   3    4.30    1.10
   3  -5  -3    3.70    1.00
  -3  -5   3    5.40    0.80
   3  -5  -3    5.00    0.70
   3  -5  -3    4.00    1.10
  -3   5   3    4.70    1.20
  -3   5   3    3.50    0.70
   3   5  -3    5.00    0.60
   3   5  -3    4.60    1.10
   3   5  -3    6.40    1.20
  -3   5   3    2.60    1.00
   2  -5  -3  175.78   18.10
  -2  -5   3  191.48   18.10
   2   5  -3  176.48   18.00
  -2   5   3  190.58   18.10
   1  -5  -3  221.88   24.90
  -1  -5   3  226.18   24.90
   1  -5  -3  274.27   24.90
  -1  -5   3  302.57   24.90
   1   5  -3  233.18   24.90
  -1   5   3  227.68   24.90
  -1   5   3  304.47   25.00
   0  -5  -3  450.45   47.50
   0  -5   3  435.36   47.70
   0  -5   3  539.75   47.60
   0  -5  -3  432.06   47.70
   0  -5  -3  506.65   47.70
   0  -5   3  486.55   47.70
   0  -5  -3  412.36   47.70
   0   5   3  556.64   47.60
   0   5   3  553.14   47.80
   0   5  -3  518.35   47.70
   0   5  -3  514.05   47.50
  -1  -5  -3  139.39   16.00
   1  -5   3  153.88   16.00
   1  -5   3  182.48   15.90
   1  -5   3  164.68   15.90
  -1  -5  -3  173.68   15.90
  -1   5  -3  142.39   15.90
  -1   5  -3  163.88   16.00
   1   5   3  177.38   16.00
   1   5   3  152.08   16.00
  -1   5  -3  176.58   15.90
   2  -5   3  177.38   15.00
   2  -5   3  151.48   15.00
  -2  -5  -3  141.19   15.00
  -2  -5  -3  162.08   15.00
   2   5   3  148.39   14.90
  -2   5  -3  132.99   14.90
   2   5   3  159.78   15.10
  -2   5  -3  155.98   14.90
  -2   5  -3  141.99   15.00
   3  -5   3   18.70    2.10
  -3  -5  -3   17.00    2.00
  -3  -5  -3   20.30    2.50
  -3  -5  -3   19.10    2.30
   3  -5   3   18.50    2.30
  -3   5  -3   21.20    2.50
   3   5   3   20.30    2.60
   3   5   3   14.50    2.10
   3   5   3   15.70    2.00
  -3   5  -3   13.50    2.20
  -3   5  -3   12.40    2.20
  -3   5  -3   18.90    2.10
   4  -5   3  185.58   20.70
  -4  -5  -3  221.78   20.50
   4  -5   3  191.48   20.50
  -4  -5  -3  209.18   20.80
   4   5   3  178.18   20.60
  -4   5  -3  222.28   20.70
   4   5   3  230.38   20.50
  -4   5  -3  219.88   20.50
  -4   5  -3  230.88   20.90
   5  -5   3    0.70    1.00
  -5  -5  -3    1.50    0.70
   5  -5   3    1.90    1.00
  -5  -5  -3    0.40    1.30
  -5   5  -3    4.10    0.90
   5   5   3    0.90    1.00
   5   5   3    1.40    0.70
  -5   5  -3    1.20    1.30
   6  -5   3   58.19    5.90
  -6  -5  -3   44.80    6.10
   6  -5   3   70.09    6.40
   6   5   3   49.00    5.60
  -6   5  -3   53.99    5.70
   6   5   3   56.29    5.70
   6   5   3   61.69    6.10
  -6   5  -3   51.89    6.30
   7  -5   3   19.60    3.10
   7  -5   3   19.80    2.90
  -7  -5  -3   16.20    3.10
  -7   5  -3   17.70    3.10
   7   5   3   19.60    2.40
   7   5   3   26.10    3.20
  -7   5  -3   15.40    2.50
   8  -5   3   51.79    6.90
  -8  -5  -3   49.20    6.90
   8   5   3   59.39    6.70
  -8   5  -3   63.99    6.10
  -8   5  -3   54.49    6.90
   9  -5   3    9.60    2.60
  -9  -5  -3   10.40    3.00
  -9   5  -3    5.70    2.60
 -10  -5  -3   15.30    3.70
  10  -5   3   16.80    3.70
 -10   5  -3    9.80    3.40
  10   5   3   14.20    3.40
  11  -5   3    1.70    3.70
 -11  -5  -3   10.10    4.00
  11   5   3   -6.30    3.20
 -11   5  -3    1.70    3.70
  12   5   3    0.20    4.40
 -12   5  -3   -5.20    4.30
 -12  -6   3   16.70    4.60
  12  -6  -3    8.30    4.40
  11  -6  -3   90.09   11.80
 -11  -6   3  122.59   12.30
 -10  -6   3   39.40    5.80
  10  -6  -3   41.50    6.00
 -10   6   3   30.70    5.10
  10   6  -3   42.20    5.90
 -10   6   3   36.30    5.20
  10   6  -3   37.30    5.80
   9  -6  -3  137.89   12.20
  -9  -6   3  105.19   12.20
  -9   6   3  100.89   11.80
   9   6  -3  114.89   11.70
   9   6  -3  108.99   11.90
  -9   6   3  105.69   11.70
   8  -6  -3  121.99   11.30
  -8  -6   3   86.69   11.40
  -8   6   3  125.29   11.40
   8   6  -3   83.69   11.10
   8   6  -3  127.49   11.00
  -8   6   3   94.89   11.00
  -7  -6   3  206.88   24.70
   7  -6  -3  276.47   24.80
  -7   6   3  238.78   24.60
   7   6  -3  254.97   24.70
   7   6  -3  262.57   24.40
  -7   6   3  247.18   24.40
   6  -6  -3  213.98   21.40
  -6  -6   3  214.08   21.50
  -6   6   3  206.78   21.40
   6   6  -3  227.18   21.40
   5  -6  -3  299.57   32.90
  -5  -6   3  372.16   33.20
   5  -6  -3  317.87   33.10
  -5  -6   3  305.07   32.80
   5   6  -3  356.26   32.80
  -5   6   3  384.16   33.30
   4  -6  -3  670.23   68.69
  -4  -6   3  704.33   68.69
   4  -6  -3  768.72   68.39
   4   6  -3  711.33   68.69
   4   6  -3  605.04   68.39
  -4   6   3  710.83   68.79
  -4   6   3  779.32   68.39
  -3  -6   3 1073.29  111.69
  -3  -6   3 1228.68  111.39
   3  -6  -3 1106.29  111.79
   3  -6  -3 1061.09  111.69
  -3  -6   3 1247.08  111.79
   3   6  -3 1180.58  111.69
   3   6  -3 1176.38  111.39
  -3   6   3 1151.28  111.79
   3   6  -3 1082.59  111.69
  -3   6   3 1191.18  111.79
  -3   6   3 1188.88  111.39
  -2  -6   3 1889.71  209.28
   2   6  -3 1977.70  209.28
  -2   6   3 2079.89  209.28
  -2   6   3 2287.37  209.38
   2   6  -3 2594.34  209.38
   1  -6  -3  837.72   80.49
  -1  -6   3  827.02   80.49
   1   6  -3  825.12   80.39
   0  -6  -3 1106.69  115.49
   0  -6  -3 1073.49  115.49
   0  -6   3 1352.76  115.49
   0  -6   3 1208.68  115.59
   0  -6  -3 1411.36  115.39
   0   6  -3 1072.79  115.39
   0   6   3 1128.59  115.49
   1  -6   3  690.83   76.89
   1  -6   3  877.31   76.89
  -1  -6  -3  825.62   76.79
   1  -6   3  772.12   76.79
   1   6   3  805.82   76.89
  -1   6  -3  742.13   76.89
  -1   6  -3  841.72   76.79
  -2  -6  -3 1241.48  123.49
   2  -6   3 1210.38  123.49
  -2  -6  -3 1535.15  123.59
   2   6   3 1258.17  123.59
  -2   6  -3 1131.39  123.49
   2   6   3 1414.16  123.59
  -2   6  -3 1151.78  123.49
   3  -6   3  236.78   22.60
   3  -6   3  212.38   22.50
  -3  -6  -3  242.88   22.60
  -3  -6  -3  220.98   22.40
  -3  -6  -3  192.18   22.60
   3   6   3  239.98   22.50
   3   6   3  249.28   22.80
  -3   6  -3  247.88   22.60
   3   6   3  215.38   22.50
  -3   6  -3  226.48   22.60
  -3   6  -3  249.78   22.70
  -3   6  -3  230.28   22.50
  -4  -6  -3  765.62   72.89
   4  -6   3  631.14   72.59
  -4  -6  -3  624.64   72.59
   4  -6   3  787.92   72.89
   4   6   3  823.12   72.69
  -4   6  -3  818.92   72.89
  -4   6  -3  805.62   72.69
   5  -6   3  359.96   30.20
  -5  -6  -3  282.77   29.80
   5  -6   3  275.97   29.80
  -5  -6  -3  267.67   30.10
  -5   6  -3  330.87   30.20
  -5   6  -3  305.17   29.90
   5   6   3  336.87   30.10
   5   6   3  296.07   29.80
   6  -6   3  448.06   43.30
   6  -6   3  421.06   43.60
   6   6   3  487.45   43.30
  -6   6  -3  418.16   43.60
  -7  -6  -3  203.98   21.90
   7  -6   3  233.28   21.90
   7   6   3  198.88   21.30
   7   6   3  237.08   21.70
   8  -6   3   92.69   10.60
  -8  -6  -3   89.19   10.70
  -8   6  -3   89.69   10.70
   8   6   3  116.99   10.50
   9  -6   3   48.70    6.50
  -9  -6  -3   45.00    6.70
  -9   6  -3   46.50    6.40
 -10  -6  -3  102.19   11.20
  10  -6   3  100.79   11.10
 -10   6  -3   92.69   11.10
  10   6   3   83.89   10.70
  11  -6   3   16.60    4.90
 -11  -6  -3   12.10    4.30
  11   6   3   10.00    3.90
 -11   6  -3   12.00    4.30
 -11  -7   3   27.90    5.30
  11  -7  -3   22.50    4.80
 -11   7   3   32.30    5.40
  10  -7  -3  109.19   11.90
 -10  -7   3  104.79   11.90
 -10   7   3  103.39   11.60
  10   7  -3   95.99   11.60
  10   7  -3  108.19   11.40
  -9  -7   3   49.80    7.00
   9  -7  -3   44.10    6.70
   9   7  -3   55.89    6.40
  -9   7   3   54.69    6.50
   9   7  -3   57.09    6.70
  -9   7   3   58.69    6.90
   8  -7  -3   92.39   10.00
   8   7  -3   95.19   10.00
   8   7  -3   80.49    9.60
  -8   7   3  105.79    9.80
   7  -7  -3  120.69   14.40
  -7  -7   3  119.49   14.50
   7  -7  -3  169.68   14.50
   7   7  -3  143.89   14.10
  -7   7   3  154.88   14.50
  -7   7   3  140.49   14.10
   6  -7  -3   27.10    3.90
  -6  -7   3   29.50    3.80
  -6  -7   3   35.80    4.20
   6   7  -3   26.80    3.90
  -6   7   3   31.40    3.70
  -6   7   3   40.00    4.20
  -5  -7   3  127.89   13.00
   5  -7  -3  153.28   13.40
  -5  -7   3  121.09   13.40
  -5   7   3  130.59   13.00
  -5   7   3  156.48   13.50
   5   7  -3  117.09   13.30
   5   7  -3  124.69   12.90
  -4  -7   3  231.98   24.90
   4  -7  -3  267.27   25.30
  -4   7   3  234.48   25.30
   4   7  -3  276.27   25.30
   4   7  -3  273.77   24.90
  -3  -7   3  189.38   17.90
  -3  -7   3  181.38   17.90
  -3  -7   3  180.28   18.20
   3   7  -3  186.28   18.30
  -3   7   3  184.28   18.40
  -2  -7   3   66.79    7.30
  -2  -7   3   68.19    7.20
   2  -7  -3   67.29    7.10
  -2  -7   3   74.89    6.80
   2  -7  -3   66.79    7.30
  -2   7   3   68.79    7.20
   2   7  -3   73.19    7.30
   2   7  -3   71.19    7.20
   1  -7  -3  151.38   14.50
  -1  -7   3  140.89   14.20
   1   7  -3  130.69   14.50
  -1   7   3  166.48   14.70
   0  -7   3   64.19    6.50
   0  -7  -3   64.39    6.50
   0  -7  -3   56.09    6.50
   0  -7  -3   69.79    6.20
   0   7  -3   57.19    6.40
   1  -7   3  494.35   49.90
  -1  -7  -3  501.95   49.90
  -1  -7  -3  469.85   49.80
   1   7   3  555.64   49.80
  -1   7  -3  459.95   49.80
  -1   7  -3  595.74   49.80
   2  -7   3  127.19   13.10
  -2  -7  -3  130.79   13.00
  -2   7  -3  131.29   13.00
   2   7   3  144.49   13.20
  -2   7  -3  125.09   13.00
   3  -7   3   79.29    8.00
  -3  -7  -3   75.19    8.00
  -3   7  -3   86.39    8.00
  -3   7  -3   73.49    7.90
   3   7   3   84.39    8.20
   3   7   3   81.09    7.90
   3   7   3   65.49    7.80
  -4  -7  -3   22.00    2.90
  -4  -7  -3   29.00    3.30
   4  -7   3   29.20    3.20
   4  -7   3   20.90    3.10
  -4   7  -3   27.00    3.30
   4   7   3   28.40    3.00
   4   7   3   18.00    2.80
  -5  -7  -3   53.39    7.10
   5  -7   3   68.89    7.40
  -5  -7  -3   63.99    7.40
  -5   7  -3   74.29    7.60
   5   7   3   77.39    7.20
   5   7   3   69.79    7.30
  -5   7  -3   78.19    7.30
   6  -7   3    1.60    1.30
  -6  -7  -3   -0.10    1.20
  -6  -7  -3    2.10    1.60
   6  -7   3    0.60    1.60
  -6   7  -3    0.50    1.50
   6   7   3    1.30    1.10
  -6   7  -3   -2.10    1.00
   6   7   3    1.50    1.10
   7  -7   3    5.90    2.00
  -7  -7  -3   10.60    2.50
  -7   7  -3   10.00    1.90
  -7   7  -3    7.50    2.20
   7   7   3    8.70    1.80
   7   7   3    9.30    2.10
  -8   7  -3   18.10    3.40
  -8   7  -3   19.80    2.80
   8   7   3   22.90    3.40
  -9  -7  -3   35.60    5.50
   9  -7   3   39.90    6.00
  -9   7  -3   34.00    5.50
   9   7   3   51.19    6.10
 -10  -7  -3   -2.20    2.80
  10  -7   3    4.50    3.20
  10   7   3    3.20    2.90
 -10   7  -3    4.10    3.30
  11  -7   3    2.10    3.90
 -11  -7  -3    1.90    4.00
  11   7   3   -0.20    3.60
 -11   7  -3    7.70    4.00
 -11  -8   3   69.49    8.80
  11  -8  -3   53.19    8.00
  10  -8  -3    0.90    3.10
 -10  -8   3    4.90    2.70
  10   8  -3    1.10    2.70
 -10   8   3    3.50    3.10
   9  -8  -3   89.09   10.40
  -9  -8   3   88.99   10.50
  -9   8   3  102.59   10.60
   9   8  -3   94.19   10.30
  -9   8   3   92.89   10.00
   8  -8  -3   26.10    4.00
   8   8  -3   22.70    3.20
  -8   8   3   23.50    3.40
  -8   8   3   30.40    4.00
   8   8  -3   23.40    3.60
  -7  -8   3  244.78   24.80
  -7   8   3  281.47   24.80
   7   8  -3  230.88   24.20
  -7   8   3  265.07   24.30
   7   8  -3  218.28   24.60
  -6  -8   3   33.50    4.40
  -6  -8   3   28.20    4.00
   6  -8  -3   35.40    4.40
  -6   8   3   36.20    3.80
   6   8  -3   32.50    3.70
   6   8  -3   33.10    4.30
  -6   8   3   39.20    4.60
   5  -8  -3  146.99   13.80
  -5  -8   3  130.09   13.30
   5   8  -3  142.69   13.30
  -5   8   3  132.39   13.30
  -5   8   3  132.79   13.30
   5   8  -3  128.49   13.70
   4  -8  -3    2.10    0.90
  -4  -8   3    0.40    0.60
  -4  -8   3    0.60    1.00
  -4   8   3   -0.40    1.20
  -4   8   3    1.80    0.50
   4   8  -3    0.40    1.10
  -3  -8   3 1202.08  109.89
   3  -8  -3 1135.29  109.89
  -3  -8   3 1231.58  109.59
  -3  -8   3  968.60  109.59
   3   8  -3 1080.99  109.99
  -3   8   3 1192.08  110.09
   2  -8  -3   20.20    2.50
  -2  -8   3   18.30    2.50
  -2  -8   3   18.90    2.00
  -2  -8   3   21.10    2.00
   2   8  -3   17.40    2.50
   1  -8  -3  502.95   49.99
  -1  -8   3  521.75   49.90
   1  -8  -3  463.25   49.60
  -1  -8   3  527.45   49.70
  -1  -8   3  558.24   50.09
   1   8  -3  460.25   49.99
  -1   8   3  501.85   49.99
  -1   8   3  574.34   49.70
   0  -8  -3    4.90    0.80
   0  -8   3    4.30    1.00
   0  -8   3    5.40    0.90
   0  -8   3    5.50    1.30
   0  -8  -3    4.80    1.20
   0  -8  -3    4.60    1.10
   0  -8  -3    5.80    1.30
   0   8  -3    3.50    1.00
   0   8   3    5.80    1.00
   0   8  -3    5.10    1.20
   0   8  -3    6.30    0.90
   0   8   3    6.30    1.40
  -1  -8  -3  536.45   51.89
   1  -8   3  580.34   51.79
   1  -8   3  529.15   51.79
  -1  -8  -3  555.34   51.89
  -1   8  -3  558.14   51.99
   1   8   3  456.85   51.79
   1   8   3  522.65   51.89
   2  -8   3    0.90    0.60
   2  -8   3    3.00    0.90
  -2  -8  -3    2.30    1.10
   2  -8   3    3.50    1.20
  -2  -8  -3    1.80    1.20
   2   8   3    3.20    0.90
  -2   8  -3    2.20    0.90
  -2   8  -3    2.00    0.90
   2   8   3    2.50    1.00
   2   8   3    1.50    1.20
  -2   8  -3    3.40    1.10
   3  -8   3  753.12   76.69
  -3  -8  -3  731.23   76.69
   3   8   3  840.02   76.79
  -3   8  -3  895.91   76.79
   3   8   3  759.72   76.69
  -3   8  -3  766.42   76.69
   4  -8   3  160.88   14.30
   4  -8   3  145.89   14.30
  -4  -8  -3  139.69   14.20
   4   8   3  149.99   14.20
   4   8   3  123.69   14.10
  -4   8  -3  148.59   14.30
  -4   8  -3  125.79   14.10
  -5  -8  -3  930.61   86.39
   5  -8   3  917.11   86.39
  -5   8  -3  841.12   86.19
   5   8   3  802.52   86.09
   5   8   3  957.10   86.29
  -6  -8  -3   31.00    4.50
  -6  -8  -3   34.40    4.90
   6  -8   3   36.00    4.80
   6   8   3   36.70    4.50
  -6   8  -3   44.20    4.50
  -6   8  -3   49.80    5.00
   6   8   3   33.60    4.30
  -7  -8  -3  294.87   28.60
   7  -8   3  256.17   28.40
   7   8   3  281.07   28.00
  -7   8  -3  309.47   28.10
  -8  -8  -3   21.30    4.00
   8  -8   3   25.30    4.10
  -8   8  -3   24.80    3.40
  -8   8  -3   26.60    4.20
   8   8   3   27.00    3.90
  -9  -8  -3  269.47   27.50
   9  -8   3  272.97   27.50
  -9   8  -3  273.17   27.70
  10  -8   3    8.20    3.40
 -10  -8  -3    6.20    3.40
  10   8   3   12.90    3.60
 -10   8  -3   12.80    3.80
  11  -8   3  280.77   28.40
 -11  -8  -3  259.67   28.20
 -11   8  -3  281.17   28.00
  11  -9  -3  161.38   17.00
 -11  -9   3  149.29   17.10
 -10  -9   3    3.20    3.00
  10  -9  -3    4.10    3.20
  10   9  -3    2.70    3.30
 -10   9   3    3.40    3.30
   9  -9  -3  171.48   16.90
  -9  -9   3  143.49   16.90
   9   9  -3  158.18   16.70
  -9   9   3  172.88   16.90
  -8  -9   3    2.70    2.50
   8  -9  -3    1.60    2.00
   8   9  -3   -0.30    1.80
  -8   9   3    0.80    2.10
  -8   9   3    0.10    1.70
   8   9  -3    0.60    1.50
   7  -9  -3  197.78   19.00
  -7  -9   3  195.48   19.00
   7   9  -3  173.28   18.40
   7   9  -3  185.18   18.80
  -6  -9   3   -0.20    1.30
   6  -9  -3    0.50    1.50
  -6  -9   3   -0.90    1.30
  -6   9   3   -0.20    1.60
  -6   9   3    0.10    1.00
  -6   9   3   -0.60    1.00
   6   9  -3    1.30    0.90
   6   9  -3    2.50    1.60
  -5  -9   3  411.16   39.70
   5  -9  -3  484.95   39.90
  -5  -9   3  358.26   39.30
   5   9  -3  424.66   39.30
   5   9  -3  401.36   39.70
  -5   9   3  366.76   39.20
  -5   9   3  401.16   39.20
   4  -9  -3  115.29   12.00
  -4  -9   3  116.89   11.50
  -4  -9   3  124.99   11.50
   4   9  -3  109.89   12.00
   3  -9  -3 1054.59  103.19
  -3  -9   3 1026.60  102.79
   3   9  -3 1155.88  103.29
  -3   9   3 1022.20  103.29
  -2  -9   3    6.10    0.80
  -2  -9   3    4.80    1.20
   2  -9  -3    3.50    1.10
  -2  -9   3    5.40    0.80
  -2   9   3    6.00    1.50
   2   9  -3    3.20    1.20
  -1  -9   3  233.08   27.30
  -1  -9   3  311.67   27.20
   1  -9  -3  273.07   27.40
   1   9  -3  308.77   27.50
  -1   9   3  263.87   27.10
  -1   9   3  290.27   27.50
   0  -9   3    8.30    1.30
   0  -9  -3    9.70    1.30
   0  -9   3   10.50    1.60
   0  -9  -3    7.80    1.50
   0   9  -3   11.80    1.50
   0   9   3    9.00    1.70
   0   9   3   10.80    1.40
   0   9  -3   10.60    1.70
   0   9  -3   11.30    1.80
   1  -9   3  207.68   21.70
  -1  -9  -3  245.58   21.80
  -1  -9  -3  231.28   21.60
   1  -9   3  255.87   21.70
  -1   9  -3  244.48   21.80
  -1   9  -3  186.08   21.60
  -1   9  -3  211.78   21.80
   1   9   3  185.78   21.70
   1   9   3  227.18   21.90
  -2  -9  -3   14.60    2.00
   2  -9   3   10.90    1.70
  -2  -9  -3   13.80    1.70
   2  -9   3   12.50    1.70
  -2   9  -3   10.80    1.80
   2   9   3   12.20    1.90
  -2   9  -3   10.40    1.80
  -2   9  -3    6.80    1.70
   2   9   3   10.70    2.00
  -3  -9  -3   97.69   10.20
  -3  -9  -3  107.19   10.30
   3  -9   3  107.29   10.30
   3   9   3   87.29   10.10
  -3   9  -3   98.59   10.20
   3   9   3  107.19   10.30
   4  -9   3   19.80    3.10
  -4  -9  -3   25.00    3.20
  -4  -9  -3   21.40    3.10
   4   9   3   28.90    3.20
  -4   9  -3   18.80    3.00
  -4   9  -3   25.00    3.30
   4   9   3   22.60    2.90
  -5  -9  -3   27.60    3.70
   5  -9   3   21.60    3.60
  -5  -9  -3   30.70    3.70
  -5   9  -3   30.40    3.50
  -5   9  -3   21.40    3.50
   5   9   3   19.00    3.30
   5   9   3   32.90    3.50
  -6  -9  -3    5.30    2.20
  -6  -9  -3    8.00    2.10
   6  -9   3    6.00    1.90
  -6   9  -3    5.60    1.80
  -6   9  -3    7.50    1.70
   6   9   3    5.70    1.70
   6   9   3    6.80    1.70
   7  -9   3    5.90    2.10
  -7  -9  -3    6.50    2.40
   7   9   3    1.10    1.70
   7   9   3    4.00    1.70
  -7   9  -3    2.70    2.00
  -7   9  -3    8.50    2.10
   8  -9   3   -2.20    1.90
  -8  -9  -3   -2.30    2.20
  -8   9  -3    0.00    2.40
  -8   9  -3    1.80    1.80
   8   9   3   -0.20    1.80
  -9  -9  -3    4.60    3.10
   9  -9   3    3.20    2.70
   9   9   3    2.40    2.50
 -10  -9  -3    3.20    3.30
  10  -9   3    4.90    3.60
 -10   9  -3    0.90    3.40
  10   9   3   -3.70    3.10
  11  -9   3    7.50    4.30
 -11  -9  -3    9.80    5.30
 -11   9  -3    3.20    4.40
  11   9   3    5.90    4.50
  11 -10  -3   33.80    5.70
 -11 -10   3   25.00    6.20
 -10 -10   3   11.00    4.10
  10 -10  -3   33.90    4.80
 -10  10   3   17.80    4.70
  10  10  -3   16.10    4.30
   9 -10  -3   40.60    6.10
  -9 -10   3   47.90    6.60
   9  10  -3   38.90    6.20
  -9  10   3   42.20    5.90
   8 -10  -3   63.99    7.10
  -8 -10   3   54.69    7.20
  -8  10   3   67.19    7.20
   8  10  -3   51.99    7.10
   8  10  -3   52.39    6.30
   7 -10  -3  295.17   28.50
  -7  10   3  276.97   28.50
  -6 -10   3   54.19    5.50
   6 -10  -3   45.50    5.20
   6  10  -3   35.30    4.40
  -6  10   3   47.70    5.40
   6  10  -3   31.50    5.10
  -6  10   3   45.20    4.50
   5 -10  -3  392.66   39.90
  -5 -10   3  363.56   39.50
  -5 -10   3  481.55   40.10
  -5  10   3  427.06   39.40
   5  10  -3  375.96   39.90
  -4 -10   3   33.90    3.60
  -4 -10   3   33.50    3.60
   4 -10  -3   42.00    4.30
  -4 -10   3   31.90    4.20
  -4  10   3   38.00    4.40
   4  10  -3   30.40    4.20
   3 -10  -3  427.46   38.90
  -3 -10   3  348.17   38.50
  -3 -10   3  363.76   38.50
  -3 -10   3  419.36   38.90
   3  10  -3  422.16   39.00
  -3  10   3  415.26   39.00
  -2 -10   3  188.68   16.00
  -2 -10   3  159.28   16.20
  -2 -10   3  139.09   15.90
  -2  10   3  172.28   16.50
   2  10  -3  159.88   16.40
   1 -10  -3  451.65   45.20
  -1 -10   3  529.45   45.60
  -1 -10   3  459.55   45.40
  -1 -10   3  498.35   45.40
  -1  10   3  400.16   45.70
   0 -10  -3   87.69    9.40
   0 -10   3  107.89    9.60
   0 -10  -3  105.49    9.80
   0 -10   3  101.89    9.70
   0  10   3   84.39    9.60
   0  10  -3   88.19    9.50
   0  10  -3  101.29    9.90
   0  10   3   95.59    9.90
  -1 -10  -3  952.50   83.09
  -1 -10  -3  933.81   82.89
   1 -10   3  871.31   82.89
  -1  10  -3  700.53   82.99
   1  10   3  720.63   82.89
   1  10   3  958.90   83.19
   2 -10   3  343.77   36.70
   2 -10   3  376.46   36.80
   2  10   3  397.06   36.90
  -2  10  -3  381.16   36.80
   2  10   3  401.36   36.90
  -2  10  -3  363.26   36.90
   3 -10   3  559.84   52.79
  -3 -10  -3  521.45   52.69
   3  10   3  524.15   52.79
   3  10   3  575.64   52.89
  -3  10  -3  530.75   52.79
  -4 -10  -3  216.58   21.20
   4  10   3  239.38   21.30
  -4  10  -3  214.18   21.30
  -4  10  -3  210.18   21.20
   4  10   3  191.78   21.10
   5 -10   3  213.48   24.30
  -5 -10  -3  291.57   24.50
  -5  10  -3  201.18   24.30
   5  10   3  274.27   24.30
   5  10   3  254.87   24.20
  -5  10  -3  238.58   24.30
   6 -10   3  115.29   13.30
  -6 -10  -3  122.89   13.40
   6  10   3  132.29   13.20
  -6  10  -3  123.39   13.40
   6  10   3  151.28   13.30
   7 -10   3  148.99   17.20
  -7 -10  -3  189.98   17.40
  -7  10  -3  136.79   17.10
  -7  10  -3  163.98   17.00
   7  10   3  195.58   17.10
   7  10   3  173.48   16.90
   8 -10   3   38.80    5.50
  -8 -10  -3   32.30    5.30
  -8  10  -3   45.30    5.30
   8  10   3   35.20    5.30
  -8  10  -3   39.00    5.70
  -9 -10  -3  140.79   16.10
   9 -10   3  166.38   16.20
   9  10   3  144.89   15.80
 -10 -10  -3   64.69    9.80
  10  10   3   73.49    9.60
 -10  10  -3   83.39    9.90
  11  10   3   68.69    9.10
 -10 -11   3   59.89    8.00
  10 -11  -3   39.50    6.50
 -10  11   3   49.80    6.90
  10  11  -3   45.10    6.70
   9 -11  -3   79.69    9.10
  -9 -11   3   78.39    9.50
  -9  11   3   73.59    9.20
   9  11  -3   70.79    9.10
  -8 -11   3   76.99    9.30
   8 -11  -3   85.69    9.20
   8  11  -3   74.09    9.10
   7 -11  -3  103.59   11.30
  -7 -11   3   96.99   11.40
   7  11  -3  103.99   11.30
  -7  11   3  116.49   11.50
   6 -11  -3   59.39    7.40
  -6 -11   3   66.19    7.60
  -6  11   3   71.39    6.70
   6  11  -3   62.19    7.50
  -6  11   3   67.89    7.70
   5 -11  -3  193.08   18.90
  -5 -11   3  154.48   18.30
  -5 -11   3  201.18   19.00
  -5 -11   3  208.38   18.40
  -5  11   3  189.58   19.10
  -4 -11   3  124.79   11.90
  -4 -11   3  122.69   11.90
   4 -11  -3  106.79   12.30
  -4  11   3  140.39   12.70
   4  11  -3  112.79   12.50
  -3 -11   3  310.27   32.70
  -3 -11   3  310.87   32.70
  -3 -11   3  287.67   33.10
   3 -11  -3  370.36   33.20
   3  11  -3  392.66   33.40
  -3  11   3  369.86   33.40
   2 -11  -3   62.99    6.10
  -2 -11   3   57.69    5.70
  -2 -11   3   53.79    6.00
  -2 -11   3   50.49    5.60
  -2  11   3   50.29    6.20
   2  11  -3   60.99    6.20
   1 -11  -3  162.28   17.50
   1 -11  -3  173.98   17.10
  -1 -11   3  158.58   17.30
  -1 -11   3  181.98   17.50
  -1  11   3  161.88   17.20
   1  11  -3  203.68   17.70
  -1  11   3  204.88   17.80
   0 -11  -3  108.09   10.30
   0 -11   3  114.49   10.50
   0 -11   3  103.49   10.50
   0 -11  -3  116.39   10.70
   0  11  -3   87.69   10.40
   0  11  -3  109.89   10.70
   0  11   3   91.29   10.40
   0  11   3  109.59   10.80
  -1 -11  -3   37.50    4.50
   1 -11   3   37.70    4.30
   1 -11   3   45.40    4.40
  -1  11  -3   35.10    4.40
   1  11   3   34.20    4.60
  -1  11  -3   42.90    4.60
   1  11   3   44.00    4.70
  -2 -11  -3  129.09   12.90
   2 -11   3  112.79   12.90
   2 -11   3  133.29   13.00
  -2 -11  -3  139.09   13.10
   2  11   3  134.19   13.20
  -2  11  -3  123.59   13.10
   2  11   3  139.29   13.30
  -3 -11  -3   85.09    9.10
   3 -11   3   90.49    9.20
  -3  11  -3   90.19    9.20
  -4 -11  -3  106.69   10.90
   4 -11   3   97.79   10.90
  -4  11  -3  104.19   10.90
   4  11   3  113.19   11.00
   5 -11   3   53.69    6.40
  -5 -11  -3   63.19    6.50
   5  11   3   50.79    6.30
  -5  11  -3   47.50    6.40
  -5  11  -3   56.99    6.30
   5  11   3   58.29    6.10
   6 -11   3   44.50    5.90
  -6 -11  -3   54.09    6.00
   6  11   3   49.60    5.60
  -6  11  -3   39.40    5.90
  -6  11  -3   47.00    5.90
   6  11   3   48.60    5.70
   7 -11   3    8.90    2.60
  -7  11  -3    3.00    2.40
  -7  11  -3    5.40    2.50
   7  11   3   10.60    2.40
   7  11   3    8.40    2.20
   8 -11   3   46.90    6.40
  -8 -11  -3   45.80    6.50
   8  11   3   37.60    5.60
  -8  11  -3   37.90    5.70
  -8  11  -3   49.50    6.10
  -9 -11  -3    3.50    3.30
   9 -11   3    0.10    3.20
   9  11   3    2.90    2.80
  -9  11  -3    3.90    3.30
 -10 -11  -3   24.80    4.80
  10 -11   3   17.50    4.50
  10  11   3   11.10    4.10
 -10  11  -3   13.20    4.40
 -10 -12   3   79.79   10.40
  10 -12  -3   75.69    9.90
 -10  12   3   62.29   10.10
  10  12  -3   70.89    9.80
   9 -12  -3    1.30    3.00
  -9 -12   3    2.00    3.30
   9  12  -3   -1.40    3.00
  -9  12   3    2.60    3.10
   8 -12  -3   90.89   10.20
  -8 -12   3   88.79   10.50
   7 -12  -3    1.30    2.30
  -7 -12   3   -2.80    2.30
   7  12  -3   -0.80    2.10
  -7  12   3   -2.90    2.20
  -6 -12   3  261.17   30.00
   6 -12  -3  325.07   30.10
  -6 -12   3  289.87   29.40
  -6  12   3  338.77   30.30
   5 -12  -3   13.30    2.70
  -5 -12   3   19.00    2.30
  -5 -12   3   21.00    3.10
  -5  12   3   17.30    3.10
   5  12  -3   20.00    3.10
  -4 -12   3  393.96   34.40
  -4 -12   3  298.37   34.30
  -4 -12   3  381.86   34.90
  -4  12   3  378.56   35.10
   4  12  -3  323.87   34.90
  -3 -12   3    1.70    1.30
  -3 -12   3    1.60    0.80
   3 -12  -3    2.00    1.20
  -3 -12   3    1.70    0.80
   3  12  -3    2.00    1.40
  -3  12   3    1.80    1.50
  -2 -12   3  615.74   52.69
   2 -12  -3  488.55   52.59
  -2 -12   3  506.75   52.29
  -2 -12   3  487.95   52.29
  -2  12   3  611.04   52.89
   1 -12  -3    0.60    0.50
  -1 -12   3    2.30    0.90
  -1 -12   3    0.90    1.00
   1 -12  -3    0.30    1.00
  -1 -12   3    0.70    1.10
   1  12  -3    0.20    1.20
  -1  12   3    0.90    0.80
  -1  12   3    0.70    1.40
   0 -12  -3  584.84   52.79
   0 -12   3  549.85   52.99
   0 -12  -3  487.75   52.99
   0  12   3  519.15   52.89
   0  12  -3  636.64   53.29
   0  12  -3  458.65   52.79
   0  12   3  584.84   53.29
   1 -12   3   29.60    3.30
   1 -12   3   29.20    3.40
  -1 -12  -3   23.90    3.40
   1  12   3   21.40    3.60
  -1  12  -3   33.00    3.70
   1  12   3   22.80    3.40
  -1  12  -3   33.40    3.70
  -2 -12  -3  765.82   70.89
   2 -12   3  717.63   70.69
   2 -12   3  801.92   70.79
  -2  12  -3  729.73   70.89
   2  12   3  627.34   70.89
  -3 -12  -3   85.69    8.30
   3 -12   3   65.99    8.20
  -3 -12  -3   85.69    8.30
   3  12   3   74.89    8.40
  -3  12  -3   81.99    8.40
   4 -12   3  410.06   44.90
  -4 -12  -3  534.05   45.00
   4  12   3  443.26   44.90
  -4  12  -3  450.05   44.90
   5 -12   3   17.80    3.00
  -5 -12  -3   26.70    3.30
  -5  12  -3   15.30    3.00
   5  12   3   17.90    2.70
  -5  12  -3   16.10    3.00
   5  12   3   17.10    3.00
   6 -12   3  228.08   24.20
   6  12   3  255.67   24.10
  -6  12  -3  243.48   24.20
   6  12   3  216.18   23.90
  -6  12  -3  263.17   24.20
   7 -12   3   24.90    4.20
  -7 -12  -3   28.70    4.30
   7  12   3   25.50    3.80
  -7  12  -3   25.10    4.20
  -7  12  -3   28.20    4.10
   7  12   3   26.40    4.00
   8 -12   3  152.18   15.00
  -8 -12  -3  129.69   14.80
  -8  12  -3  134.39   14.80
  -9 -12  -3   32.90    5.20
   9 -12   3   15.40    4.30
  -9  12  -3   22.60    4.60
   9  12   3   24.60    4.20
 -10 -12  -3  153.58   16.70
  10 -12   3  169.58   16.50
  10  12   3  120.59   15.90
  10 -13  -3   79.19   10.10
 -10 -13   3   94.79   11.00
 -10  13   3   62.69    9.70
   9 -13  -3   10.00    3.40
  -9 -13   3   12.50    4.30
   9  13  -3    8.50    3.70
  -9  13   3    6.50    3.70
   8 -13  -3  140.49   13.80
  -8 -13   3  125.09   13.90
   8  13  -3  119.29   13.70
  -8  13   3  120.29   13.80
  -7 -13   3   -0.10    2.50
   7 -13  -3    0.70    2.10
  -7  13   3   -1.50    2.40
   6 -13  -3  180.48   17.80
   6  13  -3  166.98   17.80
   5 -13  -3    1.00    1.60
  -5 -13   3    2.20    1.90
  -5 -13   3    2.30    1.00
   5  13  -3   -0.90    1.90
  -5  13   3   -1.20    1.70
  -4 -13   3  190.98   17.00
  -4 -13   3  177.48   17.50
   4 -13  -3  154.68   17.40
   4  13  -3  156.78   17.50
  -4  13   3  180.38   17.70
  -3 -13   3    6.70    1.20
  -3 -13   3    5.80    1.20
   3 -13  -3    5.10    1.60
  -3 -13   3    9.30    2.00
   3  13  -3    7.00    2.00
  -3  13   3    3.50    2.10
  -2 -13   3  250.57   24.10
  -2 -13   3  263.47   24.20
   2 -13  -3  216.88   24.40
  -2  13   3  256.37   24.70
  -1 -13   3    5.30    1.40
  -1 -13   3    5.50    1.40
   1 -13  -3    2.80    1.30
  -1 -13   3    4.00    1.20
   1 -13  -3    4.10    0.80
  -1  13   3    4.60    1.70
  -1  13   3    4.40    1.20
   1  13  -3    2.30    1.60
   0 -13  -3  131.89   15.40
   0 -13  -3  164.68   15.20
   0 -13   3  159.18   15.30
   0 -13   3  176.28   15.40
   0  13   3  154.98   15.40
   0  13  -3  130.19   15.30
   0  13  -3  165.08   15.70
  -1 -13  -3    2.50    1.30
  -1 -13  -3    2.20    1.20
   1 -13   3    0.80    0.90
   1 -13   3    1.10    1.10
   1  13   3    4.30    1.80
   1  13   3    1.40    1.40
  -1  13  -3    1.30    1.40
  -2 -13  -3   66.69    7.90
  -2 -13  -3   82.49    7.90
   2 -13   3   81.79    8.00
   2 -13   3   77.09    7.70
   2  13   3   62.19    8.10
  -2  13  -3   78.49    8.10
  -3 -13  -3    5.70    1.80
  -3 -13  -3    4.80    1.70
   3 -13   3    8.00    1.80
  -3  13  -3    3.30    1.70
   3  13   3    5.40    2.10
   4 -13   3   43.10    5.70
  -4 -13  -3   54.19    5.80
  -4  13  -3   44.40    5.90
  -4  13  -3   52.99    5.90
   4  13   3   47.80    5.90
  -5 -13  -3    7.50    2.40
   5 -13   3   10.80    2.60
   5  13   3   11.30    2.50
  -5  13  -3   16.30    2.80
  -5  13  -3    9.10    2.50
  -6 -13  -3   22.20    3.90
   6 -13   3   24.30    4.10
  -6  13  -3   24.00    3.90
  -6  13  -3   36.70    4.80
   6  13   3   25.10    3.90
   6  13   3   26.70    3.90
  -7 -13  -3   10.70    2.90
   7 -13   3   17.40    3.30
  -7  13  -3   11.90    3.20
   7  13   3   13.10    2.70
  -7  13  -3   11.70    3.00
   7  13   3   11.40    3.10
  -8 -13  -3   -4.10    2.80
   8 -13   3    2.80    3.20
  -8  13  -3    3.10    3.10
   8  13   3    1.50    2.40
  -8  13  -3    3.60    3.00
  -9 -13  -3    5.40    4.40
   9 -13   3   24.80    4.30
   9  13   3   17.20    3.90
 -10  14   3   26.40    6.10
  -9 -14   3   16.50    4.60
   9 -14  -3   16.70    4.30
   9  14  -3   13.80    4.50
  -9  14   3   15.20    4.50
   8 -14  -3   52.49    7.10
  -8 -14   3   44.30    6.50
   8  14  -3   42.90    6.40
  -8  14   3   45.10    6.50
  -7 -14   3   29.00    4.70
   7 -14  -3   23.40    4.20
   7  14  -3   25.20    4.50
  -7  14   3   43.90    5.20
  -6 -14   3  142.89   14.60
   6 -14  -3  115.09   14.40
  -6  14   3  165.78   14.90
  -5 -14   3   60.79    6.40
   5 -14  -3   48.40    6.40
   5  14  -3   39.00    6.50
  -5  14   3   60.39    6.80
  -4 -14   3  237.68   20.30
  -4 -14   3  193.48   19.60
   4 -14  -3  218.38   20.20
   4  14  -3  185.08   20.30
  -4  14   3  172.98   20.30
   3 -14  -3   25.30    3.70
  -3 -14   3   29.20    3.80
  -3 -14   3   30.20    3.20
   3  14  -3   21.20    3.70
  -3  14   3   23.10    3.80
  -2 -14   3  320.07   30.80
  -2 -14   3  306.87   30.70
  -2 -14   3  350.66   31.10
   2  14  -3  342.17   31.30
  -2  14   3  257.87   31.20
   1 -14  -3   38.70    4.80
   1 -14  -3   36.00    4.10
  -1 -14   3   43.60    4.80
  -1  14   3   43.50    5.30
   1  14  -3   50.79    5.30
   0 -14  -3  254.37   28.00
   0 -14  -3  323.37   27.80
   0  14  -3  269.87   28.30
   0  14   3  259.97   28.30
   0  14   3  310.87   28.00
  -1 -14  -3   86.79    8.50
   1 -14   3   79.89    8.60
   1 -14   3   86.89    8.70
  -1  14  -3   81.49    9.00
   1  14   3   81.39    9.10
  -2 -14  -3  459.25   45.60
   2 -14   3  456.05   45.40
  -2 -14  -3  473.85   45.40
  -2  14  -3  474.65   45.70
  -3 -14  -3   55.19    6.30
   3 -14   3   50.99    6.30
  -3 -14  -3   51.69    6.30
   3  14   3   52.89    6.70
  -3  14  -3   72.29    6.80
   4 -14   3  259.77   27.40
  -4 -14  -3  284.47   27.40
  -4  14  -3  280.97   27.50
   4  14   3  280.17   27.60
  -5 -14  -3   38.10    5.10
   5 -14   3   34.10    5.00
  -5  14  -3   35.30    5.10
   5  14   3   32.30    5.10
   6 -14   3  157.18   17.20
  -6  14  -3  174.58   17.40
   6  14   3  169.48   17.20
  -6  14  -3  166.88   17.20
  -7 -14  -3   47.60    5.80
   7 -14   3   36.50    5.40
   7  14   3   35.40    5.30
   7  14   3   34.40    5.30
  -7  14  -3   46.40    6.40
  -7  14  -3   33.50    5.40
  -8 -14  -3   83.49   10.70
   8 -14   3   91.29   10.70
   8  14   3   91.79   10.20
  -9 -14  -3   28.10    6.00
   9 -14   3   55.29    7.40
   9  14   3   31.40    5.40
  -9 -15   3    7.00    4.40
   9 -15  -3    8.60    3.90
   9  15  -3    1.70    4.40
  -9  15   3    3.90    4.30
   8 -15  -3   35.70    5.40
  -8 -15   3   32.40    5.50
   8  15  -3   38.60    5.80
  -8  15   3   33.40    5.70
  -7 -15   3    3.70    3.00
   7 -15  -3    2.20    2.70
  -7  15   3    5.30    3.10
   7  15  -3    6.80    3.20
  -6 -15   3   45.20    6.20
   6 -15  -3   46.20    6.10
  -6  15   3   45.00    6.30
   6  15  -3   41.20    6.50
   5 -15  -3   11.60    2.80
  -5 -15   3   14.30    3.10
  -5  15   3   21.00    3.60
   4 -15  -3  130.39   14.10
  -4 -15   3  148.69   14.20
  -4  15   3  149.49   14.50
   4  15  -3  119.99   14.30
  -3 -15   3   95.09    9.30
  -3 -15   3   81.39    8.70
   3 -15  -3   74.09    9.10
  -3  15   3  105.89    9.90
   3  15  -3   82.19    9.50
  -2 -15   3   59.79    7.10
   2 -15  -3   56.59    7.10
   2  15  -3   68.19    7.50
  -2  15   3   82.09    7.80
  -1 -15   3   21.40    2.90
   1 -15  -3   16.90    2.80
   1 -15  -3   17.60    2.30
  -1 -15   3   26.80    3.20
  -1  15   3   15.70    3.20
   1  15  -3   23.60    3.50
   0 -15   3   53.09    5.50
   0 -15  -3   48.30    5.60
   0 -15   3   53.99    5.60
   0  15   3   40.60    6.10
   0  15  -3   48.60    6.00
  -1 -15  -3   25.90    4.30
   1 -15   3   29.60    4.10
   1 -15   3   39.90    4.40
  -1 -15  -3   40.20    4.20
  -1  15  -3   38.80    4.80
   1  15   3   35.40    5.00
  -2 -15  -3   35.70    4.20
  -2 -15  -3   23.30    4.20
   2 -15   3   26.80    4.20
   2 -15   3   40.10    4.00
  -2  15  -3   31.20    4.60
   2  15   3   35.50    4.90
   3 -15   3   82.69    9.20
  -3 -15  -3   88.89    9.20
  -3 -15  -3   85.29    9.10
   3  15   3   84.49    9.70
  -4 -15  -3   54.29    5.80
   4 -15   3   39.40    5.70
  -4 -15  -3   46.20    5.80
   4  15   3   39.90    6.10
  -4  15  -3   40.80    6.00
  -4  15  -3   49.99    6.00
  -5 -15  -3   33.20    4.60
  -5 -15  -3   26.70    3.90
   5 -15   3   23.00    4.00
  -5  15  -3   21.90    4.00
   5  15   3   29.00    4.40
  -5  15  -3   26.70    4.20
  -6 -15  -3    9.70    2.90
   6 -15   3    6.60    2.60
  -6  15  -3   11.00    3.30
  -6  15  -3   11.80    3.00
   6  15   3    9.90    3.20
  -7 -15  -3    9.30    3.30
   7 -15   3   11.00    3.50
   7  15   3   11.70    3.60
  -7  15  -3    9.10    3.50
  -8 -15  -3    2.20    3.80
   8 -15   3    2.60    3.30
  -8  15  -3   -0.20    3.70
  -9 -15  -3   -0.30    4.50
   9 -15   3    1.00    4.10
  -9  16   3   35.70    7.10
   9  16  -3   51.79    7.30
   8 -16  -3    5.40    3.70
  -8 -16   3    6.00    3.70
  -8  16   3   -0.20    3.70
   8  16  -3    0.80    3.70
   7 -16  -3   67.79    9.60
  -7 -16   3   89.49    9.90
  -7  16   3   89.79   10.20
   7  16  -3   75.79    9.80
  -6 -16   3   24.80    4.30
   6 -16  -3   25.80    4.30
  -6  16   3   26.00    4.60
   6  16  -3   23.50    4.50
   5 -16  -3  190.68   22.20
  -5  16   3  278.47   22.90
   5  16  -3  201.68   22.40
  -4 -16   3   28.30    3.80
   4 -16  -3   18.10    3.30
   4  16  -3   22.30    3.80
  -4  16   3   19.80    3.80
   3 -16  -3  283.87   28.20
   2 -16  -3    4.90    1.90
  -2 -16   3    7.60    1.90
  -2 -16   3    6.60    1.60
   2  16  -3    5.10    2.30
  -2  16   3    3.40    2.40
  -1 -16   3  267.57   23.70
   1 -16  -3  231.58   23.30
   1 -16  -3  237.58   23.90
  -1  16   3  236.18   24.30
   1  16  -3  224.48   24.10
   0 -16  -3   33.20    4.70
   0 -16   3   43.30    4.70
   0 -16   3   34.90    4.70
   0 -16  -3   36.20    4.30
   0  16  -3   40.60    5.30
   0  16   3   42.10    5.50
  -1 -16  -3  324.67   32.00
   1 -16   3  296.87   32.00
   1 -16   3  361.76   32.20
  -1 -16  -3  302.17   32.20
   1  16   3  354.96   32.70
   2 -16   3   89.19   10.20
   2 -16   3  117.59   10.00
  -2 -16  -3   82.79   10.10
   2  16   3  108.99   10.80
  -2  16  -3   83.39   10.40
   3 -16   3  314.37   33.80
  -3 -16  -3  391.06   33.90
  -3 -16  -3  333.47   33.70
   3  16   3  332.87   34.10
  -4 -16  -3   12.10    2.90
  -4 -16  -3    8.90    2.40
   4 -16   3    7.20    2.30
   4  16   3   10.40    3.10
  -4  16  -3   10.00    2.70
  -4  16  -3    6.20    2.70
   5 -16   3  214.18   19.50
  -5 -16  -3  183.68   19.30
  -5 -16  -3  188.58   19.20
   5  16   3  194.78   19.60
  -5  16  -3  165.38   19.30
  -6 -16  -3   31.70    5.20
  -6 -16  -3   36.90    5.10
   6 -16   3   35.90    5.30
  -6  16  -3   34.00    5.50
  -6  16  -3   42.70    5.50
   6  16   3   40.90    5.80
  -7 -16  -3   74.09    9.90
   7 -16   3   80.69   10.00
  -7  16  -3   91.79   10.30
  -8 -16  -3   14.40    4.70
   8 -16   3   32.70    5.20
   8 -17  -3    4.90    3.60
  -8 -17   3    2.90    4.00
   8  17  -3    3.70    4.20
  -8  17   3    1.50    4.10
   7 -17  -3  102.89   11.30
  -7 -17   3   84.49   11.10
   7  17  -3  102.49   11.50
  -7  17   3   87.89   11.60
   6 -17  -3   -0.20    2.80
  -6 -17   3    3.40    3.00
   6  17  -3   -2.00    3.00
  -6  17   3   -0.70    3.10
   5 -17  -3   43.00    6.30
   5  17  -3   52.59    6.90
  -5  17   3   49.80    7.10
   4 -17  -3    3.40    2.20
  -4 -17   3    3.30    2.30
  -4  17   3   -0.10    2.60
   4  17  -3    1.30    2.50
   3 -17  -3   54.19    6.70
   3  17  -3   58.09    7.20
  -3  17   3   55.49    7.50
  -2 -17   3    1.70    1.60
  -2 -17   3    4.50    1.90
   2 -17  -3    1.30    1.80
  -2  17   3    0.20    2.30
   2  17  -3    3.50    2.40
  -1 -17   3   64.49    6.30
  -1 -17   3   57.59    6.10
   1 -17  -3   50.09    6.30
  -1  17   3   44.70    6.80
   1  17  -3   49.10    6.70
   0 -17  -3    1.90    1.30
   0 -17  -3    1.30    1.60
   0 -17   3    1.30    1.60
   0 -17   3   -0.10    1.60
   0  17  -3   -2.70    2.10
  -1 -17  -3   39.70    4.80
   1 -17   3   35.20    4.50
   1 -17   3   36.50    4.90
  -1 -17  -3   38.30    4.70
   2 -17   3    9.20    2.00
   2 -17   3    9.00    2.40
  -2 -17  -3    5.90    2.20
  -2 -17  -3    9.40    2.20
  -2  17  -3   10.20    2.80
  -3 -17  -3    3.40    2.20
   3 -17   3    5.00    2.10
  -3 -17  -3    5.90    2.30
  -3  17  -3    5.70    2.60
  -4 -17  -3    1.10    2.20
   4 -17   3   -1.40    2.10
  -4 -17  -3   -0.20    2.30
  -4  17  -3    3.10    2.60
  -4  17  -3   -1.30    2.50
  -5 -17  -3   32.60    4.90
   5 -17   3   33.10    5.20
  -5 -17  -3   39.60    5.20
   5  17   3   39.60    5.70
  -5  17  -3   33.60    5.20
  -5  17  -3   35.00    5.40
  -6 -17  -3    3.40    2.90
   6 -17   3    3.60    2.80
  -6 -17  -3    3.80    3.20
   6  17   3    0.80    3.70
  -6  17  -3    2.70    3.30
  -7 -17  -3    7.70    3.80
   7 -17   3    6.00    3.70
  -7 -17  -3    6.50    3.80
  -7  17  -3    5.60    3.80
   8 -17   3   15.30    4.70
  -8 -17  -3   15.20    5.00
   8  18  -3   59.59    8.30
  -8  18   3   44.40    7.70
   7 -18  -3   47.70    6.70
  -7 -18   3   36.90    6.40
   7  18  -3   54.59    7.20
  -7  18   3   41.70    7.30
   6 -18  -3   70.49    8.00
  -6 -18   3   49.90    7.60
   6  18  -3   52.79    8.10
  -6  18   3   47.50    7.30
  -5 -18   3   41.70    6.30
   5 -18  -3   51.79    6.70
  -5  18   3   47.50    7.50
   5  18  -3   58.99    7.40
   4 -18  -3   55.39    7.20
  -4 -18   3   65.99    7.40
  -4  18   3   51.69    7.80
   4  18  -3   56.99    8.00
   3 -18  -3  114.49   13.00
  -3 -18   3  144.29   13.10
   3  18  -3  109.99   13.30
  -3  18   3  122.89   13.70
   2 -18  -3   41.90    5.60
  -2 -18   3   41.00    5.60
  -2  18   3   41.40    6.40
   2  18  -3   42.10    6.10
   1 -18  -3   78.59    9.50
  -1 -18   3   95.99    9.20
  -1 -18   3   80.89    9.30
   1  18  -3   85.89    9.80
  -1  18   3   84.89   10.00
   0 -18   3   16.00    2.70
   0 -18  -3   10.50    2.70
   0 -18   3   12.40    2.70
   0  18   3   14.30    3.40
   0  18  -3   17.40    3.40
  -1 -18  -3  192.58   20.50
   1 -18   3  211.58   20.40
   1 -18   3  194.98   20.20
   1  18   3  197.88   21.00
  -1  18  -3  221.08   21.00
  -2 -18  -3    7.20    2.30
   2 -18   3    7.40    2.30
   2 -18   3    4.00    1.90
  -2 -18  -3    0.80    2.00
  -2  18  -3    3.50    2.80
   2  18   3    4.80    3.00
  -3 -18  -3  102.49   10.80
  -3 -18  -3   94.29   10.80
   3 -18   3   98.49   10.80
   3  18   3   87.69   11.30
  -3  18  -3  117.19   11.40
  -4 -18  -3    5.50    2.50
   4 -18   3    4.90    2.80
  -4 -18  -3    5.70    2.80
  -4  18  -3    4.00    3.10
  -4  18  -3    5.20    2.80
   4  18   3    6.80    3.60
  -5 -18  -3  136.19   14.50
   5 -18   3  142.29   14.60
  -5 -18  -3  136.09   14.40
  -5  18  -3  122.69   14.70
   5  18   3  136.49   15.10
  -6 -18  -3   13.30    3.60
   6 -18   3   10.60    3.60
  -6 -18  -3    5.80    3.90
   6  18   3   21.70    4.70
  -6  18  -3    5.70    4.10
  -7 -18  -3  108.79   13.90
  -7  18  -3  136.19   14.30
  -7 -19   3   95.69   12.20
   7 -19  -3   91.29   11.80
   7  19  -3  102.09   12.80
  -7  19   3  104.19   13.10
   6 -19  -3    6.10    3.60
  -6 -19   3    3.70    3.50
   6  19  -3    3.00    4.10
  -6  19   3   -2.80    3.90
  -5 -19   3   31.10    5.20
   5 -19  -3   34.10    5.20
  -5  19   3   20.20    5.30
   5  19  -3   44.70    6.00
   4 -19  -3    5.90    2.90
  -4 -19   3   11.60    3.40
  -4  19   3    9.40    3.80
   4  19  -3   17.00    3.70
  -3 -19   3   39.00    5.20
   3 -19  -3   36.00    5.20
   3  19  -3   37.10    5.60
  -3  19   3   41.60    6.20
   2 -19  -3   16.40    3.40
   2  19  -3   15.30    3.90
  -2  19   3   17.40    4.10
   1 -19  -3  108.19   11.00
  -1 -19   3  106.09   10.90
  -1  19   3   91.29   11.60
   1  19  -3   95.59   11.40
   0 -19   3   31.90    4.10
   0 -19  -3   31.30    4.60
   0 -19   3   25.90    3.90
   0  19  -3   27.70    4.60
   0  19   3   25.40    4.90
   1 -19   3   79.39    8.60
   1 -19   3   87.09    8.90
  -1  19  -3   69.19    9.30
   1  19   3   75.09    9.70
  -2 -19  -3   -2.10    2.40
   2 -19   3    2.30    2.40
   2 -19   3    2.20    2.10
   2  19   3    1.10    3.20
  -2  19  -3   -1.40    2.90
   3 -19   3    0.80    2.80
  -3 -19  -3   -4.10    2.60
  -3  19  -3    1.60    3.00
   3  19   3    1.70    3.00
  -4 -19  -3   -0.80    2.70
   4 -19   3    4.20    2.90
   4  19   3    3.10    3.60
  -4  19  -3    5.40    3.30
  -5 -19  -3   10.10    3.40
   5 -19   3   14.60    3.70
  -5 -19  -3   13.10    3.90
   5  19   3   12.90    4.40
  -5  19  -3   12.40    4.10
   6 -19   3    3.10    3.80
  -6 -19  -3    6.30    4.00
   6  19   3    2.10    4.50
  -6  19  -3    6.20    4.40
   7 -19   3    4.30    4.30
  -7 -19  -3    5.00    4.40
  -7  19  -3    4.10    4.70
   6 -20  -3   95.39   11.10
  -6 -20   3   75.59   11.10
   6  20  -3  104.89   11.90
  -6  20   3   86.49   11.90
  -5 -20   3    5.60    3.50
   5 -20  -3    1.90    3.20
   5  20  -3   -0.90    3.70
  -5  20   3   -4.90    4.00
  -4 -20   3   55.49    7.90
   4 -20  -3   68.69    8.40
   4  20  -3   74.79    8.90
  -4  20   3   54.89    8.30
   3 -20  -3   23.30    4.10
  -3 -20   3   22.00    4.10
  -3  20   3   22.60    5.10
   3  20  -3   27.10    5.00
   2 -20  -3   44.90    6.60
  -2 -20   3   47.20    6.50
  -2  20   3   44.70    6.90
   2  20  -3   45.80    6.60
   1 -20  -3   23.60    4.20
   1  20  -3   31.70    5.00
  -1  20   3   31.70    5.10
   0 -20   3   84.59    9.40
   0 -20  -3   85.89    9.60
   0  20  -3   80.49   10.30
   0  20   3   83.59   10.50
   1 -20   3    2.30    2.20
  -1 -20  -3    0.30    2.50
  -1  20  -3    8.00    3.30
   1  20   3    6.30    3.50
   2 -20   3  173.48   17.90
  -2 -20  -3  161.28   17.80
   2 -20   3  192.38   17.60
  -2  20  -3  171.08   18.40
   2  20   3  162.68   18.60
   3 -20   3    7.10    2.90
  -3 -20  -3    1.90    2.60
  -3  20  -3    4.40    3.50
   3  20   3    3.10    3.60
   4 -20   3   31.50    5.30
  -4 -20  -3   26.60    4.90
  -4 -20  -3   42.70    5.50
   4  20   3   37.50    6.10
  -4  20  -3   35.00    5.90
  -5 -20  -3   53.79    8.40
   5 -20   3   60.29    8.60
   5  20   3   63.89    9.40
  -6 -20  -3  117.99   14.80
   6 -20   3  139.99   15.10
   6  20   3  164.58   15.70
  -6  20  -3   96.29   15.10
   5 -21  -3   20.30    4.40
  -5 -21   3    6.80    4.20
   5  21  -3   14.60    4.90
  -5  21   3   15.40    5.30
   4 -21  -3  133.79   14.20
  -4 -21   3  101.39   13.90
  -4  21   3  145.69   15.00
   4  21  -3  136.09   15.00
  -3 -21   3   12.10    3.70
   3 -21  -3   16.70    3.90
  -3  21   3    8.50    5.00
   3  21  -3    9.10    4.20
  -2 -21   3   38.60    5.30
   2 -21  -3   39.60    5.50
  -2  21   3   33.10    6.40
   2  21  -3   35.10    5.80
   1 -21  -3    2.30    3.10
  -1 -21   3    5.30    3.00
   1  21  -3    3.80    3.70
  -1  21   3    6.50    3.80
   0 -21  -3   46.70    7.20
   0 -21   3   64.19    7.10
   0  21  -3   52.09    7.50
   0  21   3   47.70    7.80
  -1 -21  -3   11.60    3.10
   1  21   3   11.80    4.30
  -1  21  -3    6.30    3.80
  -2 -21  -3   14.90    3.50
   2  21   3   15.70    5.10
  -2  21  -3   15.50    4.40
  -3 -21  -3   -3.40    2.90
   3 -21   3    0.60    3.20
  -3  21  -3    5.30    3.70
   3  21   3   -1.00    3.90
   4 -21   3   31.50    5.60
  -4  21  -3   25.30    5.60
   4  21   3   38.30    6.50
   5 -21   3   41.30    6.10
  -5  21  -3   31.00    6.60
   5  21   3   36.00    7.10
  -4 -22   3   44.20    6.70
   3 -22  -3    3.00    3.60
  -3 -22   3   -0.10    3.60
  -3  22   3   -0.50    4.80
   3  22  -3   12.60    4.70
   2 -22  -3  116.89   13.60
  -2 -22   3  102.19   13.60
  -2  22   3  137.69   14.90
   2  22  -3  139.39   14.90
   1 -22  -3    0.80    3.40
  -1 -22   3   -4.50    3.20
   1  22  -3    2.20    4.20
  -1  22   3   -2.80    4.20
   0 -22  -3   80.19    9.80
   0  22   3   75.09   10.70
   0  22  -3   80.29   10.80
  -1 -22  -3   50.99    7.50
  -1  22  -3   51.79    7.80
   1  22   3   47.70    7.90
  -2 -22  -3  148.69   15.70
  -2  22  -3  141.69   16.40
   2  22   3  150.08   17.10
   3  22   3   14.20    5.60
  -3  22  -3   16.90    5.10
  -4  22  -3   87.99   13.20
   4  22   3  118.49   13.70
   2 -23  -3   23.40    5.20
   1 -23  -3    3.10    4.00
   0 -23  -3   12.80    4.30
  -1 -23  -3    4.50    3.80
   1  23   3    5.60    5.70
  12   0  -4   69.99   10.80
 -12   0   4   87.19   10.30
  11   0  -4    3.70    2.90
 -11   0   4   -2.50    3.30
  10   0  -4  223.58   23.20
  10   0  -4  232.18   23.00
   9   0  -4    0.80    1.70
   9   0  -4   -0.90    2.00
  -9   0   4    1.80    2.10
   8   0  -4  434.76   42.60
  -8   0   4  433.26   42.70
   8   0  -4  437.96   42.80
   7   0  -4   -0.60    1.10
  -7   0   4   -0.80    1.20
  -6   0   4 1102.79  101.49
   6   0  -4  990.50  101.29
  -5   0   4    0.80    1.10
   5   0  -4    2.20    0.80
  -5   0   4   -0.50    0.90
   5   0  -4    0.00    1.00
  -5   0   4    0.30    1.00
  -4   0   4 2101.79  226.88
  -4   0   4 2472.65  227.08
   4   0  -4 2476.75  227.08
   4   0  -4 2346.27  226.88
   3   0  -4   -0.60    0.70
   3   0  -4    0.40    0.60
  -3   0   4    1.40    0.60
  -3   0   4    2.20    0.80
   3   0  -4    0.40    0.50
  -2   0   4 2616.24  236.48
   2   0  -4 2176.08  236.38
   2   0  -4 2645.74  236.78
  -2   0   4 2424.76  236.58
  -2   0   4 2381.56  236.38
  -1   0   4    0.00    0.40
   1   0  -4    0.60    0.50
  -1   0   4    0.30    0.30
   1   0  -4    0.40    0.30
   1   0  -4    0.60    0.40
   0   0   4 2362.66  245.58
   0   0   4 2734.63  245.98
   0   0   4 2644.34  245.78
   0   0  -4 2426.26  245.48
   0   0  -4 2550.24  245.58
  -1   0  -4    0.00    0.40
  -1   0  -4    0.20    0.40
   1   0   4    0.50    0.40
  -1   0  -4    0.50    0.40
   2   0   4 1326.77  135.49
  -2   0  -4 1525.95  135.29
  -2   0  -4 1461.25  135.59
  -2   0  -4 1290.07  135.29
  -3   0  -4   -0.50    0.90
   3   0   4    0.10    0.70
   3   0   4    2.50    1.20
  -3   0  -4    1.00    0.70
  -4   0  -4 1185.08  114.09
   4   0   4 1167.18  113.89
   5   0   4    0.10    0.90
  -5   0  -4    0.40    1.20
   6   0   4  352.46   32.60
  -6   0  -4  307.17   32.60
  -7   0  -4    0.20    1.90
   7   0   4    0.30    1.50
  -8   0  -4  152.28   16.80
   8   0   4  173.08   16.80
   9   0   4    2.10    2.10
  -9   0  -4    0.10    2.40
 -10   0  -4   45.80    6.60
  10   0   4   49.90    6.90
 -11   0  -4    2.20    3.40
  11   0   4    5.80    3.60
 -12  -1   4    7.70    4.30
  12  -1  -4    3.70    4.10
 -12   1   4   -1.90    3.70
  12   1  -4    1.90    4.00
  11  -1  -4   20.80    4.00
 -11  -1   4   17.50    4.10
 -11   1   4   15.10    3.90
  11   1  -4   23.50    4.30
 -10  -1   4   -1.00    2.30
  10  -1  -4   -1.10    2.50
  10   1  -4    1.50    2.60
 -10   1   4   -2.10    2.50
  10   1  -4    3.60    2.40
   9  -1  -4   27.20    3.70
   9  -1  -4   15.60    3.20
  -9  -1   4   16.10    3.30
   9   1  -4   19.20    3.00
  -9   1   4   22.50    3.50
   9   1  -4   14.30    3.20
  -8  -1   4   65.59    7.70
   8   1  -4   73.49    7.40
  -8   1   4   66.49    7.60
   8   1  -4   65.69    7.70
   7  -1  -4    7.50    1.80
  -7  -1   4    8.80    2.10
  -7   1   4    8.10    1.90
   7   1  -4    8.10    1.70
   7   1  -4   13.80    2.40
  -6  -1   4   34.00    4.20
   6  -1  -4   35.20    4.00
  -6  -1   4   36.70    4.30
  -6   1   4   29.90    4.20
  -6   1   4   36.30    4.10
   6   1  -4   34.20    3.90
   6   1  -4   36.60    4.20
  -5  -1   4   15.80    2.30
  -5  -1   4   12.90    2.10
   5  -1  -4   16.70    2.10
   5  -1  -4   13.30    2.10
   5   1  -4   12.40    1.90
  -5   1   4   18.50    2.50
  -5   1   4   17.10    2.30
  -5   1   4   16.50    2.30
  -4  -1   4   84.89    7.80
   4  -1  -4   73.79    7.80
  -4   1   4   70.89    7.90
  -4   1   4   98.19    8.10
   4   1  -4   73.49    7.80
   4   1  -4   69.29    7.80
   3  -1  -4   15.20    1.80
   3  -1  -4   13.70    1.80
   3  -1  -4   13.70    2.00
  -3  -1   4   14.90    1.90
   3   1  -4   11.50    1.80
  -3   1   4   14.70    1.90
  -3   1   4   17.30    1.80
   3   1  -4    9.50    1.80
   3   1  -4   14.90    1.70
  -2  -1   4   12.40    1.50
   2  -1  -4   10.80    1.40
   2  -1  -4   11.00    1.70
   2  -1  -4   12.10    1.40
   2   1  -4    9.90    1.40
  -2   1   4   10.10    1.50
   2   1  -4   13.30    1.40
  -2   1   4   15.80    1.70
  -2   1   4   12.60    1.40
   2   1  -4    7.50    1.50
  -1  -1   4   51.19    5.00
   1  -1  -4   49.70    5.00
   1  -1  -4   42.30    5.10
   1  -1  -4   54.69    5.10
  -1   1   4   48.50    5.10
  -1   1   4   50.29    5.00
   1   1  -4   45.30    5.10
   1   1  -4   56.49    5.00
   0  -1   4  250.77   24.50
   0  -1  -4  264.17   24.50
   0  -1  -4  265.67   24.50
   0  -1   4  246.68   24.50
   0   1  -4  234.18   24.40
   0   1  -4  268.17   24.50
   0   1   4  249.88   24.50
   0   1  -4  239.28   24.50
   0   1   4  250.47   24.50
   0   1   4  248.58   24.50
  -1  -1  -4  111.49   10.10
   1  -1   4  114.09   10.20
  -1  -1  -4   87.19   10.20
  -1  -1  -4   90.09   10.20
  -1  -1  -4  107.29   10.20
   1   1   4   98.09   10.10
   1   1   4  110.29   10.20
  -1   1  -4   90.29   10.20
  -1   1  -4  114.69   10.10
  -1   1  -4  107.99   10.10
  -2  -1  -4   82.99   10.10
   2  -1   4   96.39   10.10
  -2  -1  -4   99.39   10.20
  -2  -1  -4  106.69    9.90
   2   1   4  101.19   10.10
   2   1   4  106.59    9.90
  -2   1  -4   99.59   10.20
  -2   1  -4  114.99    9.90
   3  -1   4   83.69    8.40
  -3  -1  -4   87.09    8.50
   3   1   4   86.39    8.40
   3   1   4   65.29    8.40
  -3   1  -4   89.79    8.50
  -4  -1  -4  331.07   32.10
   4  -1   4  337.87   32.00
   4   1   4  296.67   31.90
  -4   1  -4  341.87   32.10
  -5  -1  -4  129.29   14.00
  -5   1  -4  142.79   14.10
   5   1   4  142.79   13.90
   6  -1   4   90.89   11.40
  -6  -1  -4  123.69   11.80
   6   1   4  121.89   11.60
  -6   1  -4  118.09   11.70
  -7  -1  -4    2.40    2.00
   7  -1   4    7.10    2.00
   7   1   4    5.50    1.70
  -7   1  -4    7.00    2.30
   8  -1   4  100.29   10.40
  -8  -1  -4   93.89   10.60
  -8   1  -4   94.09   10.70
  -9  -1  -4    1.70    2.60
   9  -1   4    2.80    2.30
   9   1   4    5.00    2.40
  -9   1  -4    4.20    2.80
 -10  -1  -4  118.39   13.20
  10  -1   4  125.29   13.20
  10   1   4  124.79   13.20
 -10   1  -4  107.09   13.30
 -11  -1  -4    9.60    3.70
  11  -1   4   -1.20    3.20
 -11   1  -4    8.10    4.00
  11   1   4    7.00    3.70
 -12   1  -4   96.69   12.20
  12   1   4   94.09   12.70
  12  -2  -4   68.49   10.80
 -12  -2   4   97.09   10.70
 -12   2   4   78.49   10.30
 -11  -2   4   74.09    9.40
  11  -2  -4   67.89    9.30
  11  -2  -4   76.59    9.20
  11   2  -4   77.29    9.50
 -11   2   4   76.69    9.30
  10  -2  -4  106.69   11.30
 -10  -2   4  100.99   11.20
  10   2  -4  103.49   11.10
 -10   2   4  101.09   11.00
  10   2  -4   91.19   11.10
   9  -2  -4  316.87   27.70
  -9  -2   4  260.17   27.70
   9   2  -4  289.27   27.50
   9   2  -4  251.37   27.60
  -9   2   4  268.07   27.60
   8  -2  -4  164.68   14.60
  -8  -2   4  134.99   14.70
  -8   2   4  138.29   14.50
   8   2  -4  130.59   14.60
   7  -2  -4   36.00    4.40
  -7  -2   4   32.60    4.80
   7   2  -4   46.50    4.80
  -7   2   4   35.60    4.60
  -7   2   4   30.60    4.50
   7   2  -4   45.00    4.40
  -6  -2   4  812.52   72.99
   6  -2  -4  746.23   73.09
   6  -2  -4  735.53   73.09
  -6   2   4  774.42   73.09
  -6   2   4  657.23   73.09
   6   2  -4  787.92   73.19
  -5  -2   4  316.97   34.60
   5  -2  -4  319.37   34.70
  -5  -2   4  341.27   34.80
   5   2  -4  407.36   34.60
  -5   2   4  393.86   34.90
   4  -2  -4 1234.38  114.99
   4  -2  -4 1116.89  114.79
  -4  -2   4 1253.77  114.89
  -4  -2   4 1053.89  114.69
   4  -2  -4 1186.58  114.89
   4   2  -4 1148.39  114.69
   4   2  -4 1199.88  114.89
  -4   2   4 1281.57  114.79
   4   2  -4 1265.37  114.99
   4   2  -4 1214.48  114.99
  -4   2   4 1104.79  114.99
   3  -2  -4 1244.88  137.69
   3  -2  -4 1676.33  137.59
   3  -2  -4 1461.05  137.69
   3   2  -4 1263.07  137.59
  -3   2   4 1687.63  137.89
  -3   2   4 1334.97  137.69
   3   2  -4 1276.37  137.69
   3   2  -4 1445.76  137.49
   2  -2  -4 1263.07  128.09
  -2  -2   4 1497.05  128.19
   2   2  -4 1119.49  128.19
   2   2  -4 1376.56  128.19
  -2   2   4 1427.76  128.19
  -2   2   4 1269.07  128.09
  -1  -2   4 1383.76  120.09
   1  -2  -4 1131.89  120.09
   1  -2  -4 1346.47  120.09
   1  -2  -4 1111.59  120.09
   1  -2  -4 1202.48  119.99
   1   2  -4 1372.26  120.09
   1   2  -4 1196.58  120.09
  -1   2   4 1247.48  119.99
   1   2  -4 1063.49  120.09
  -1   2   4 1367.36  120.19
   0  -2  -4 1026.50  116.39
   0  -2   4 1203.28  116.39
   0  -2  -4 1341.77  116.29
   0  -2   4 1168.58  116.29
   0  -2  -4 1211.68  116.39
   0   2   4 1243.18  116.39
   0   2  -4 1242.18  116.29
   0   2   4 1252.67  116.39
   0   2  -4 1142.19  116.39
   1  -2   4   97.09    9.00
  -1  -2  -4   91.89    8.90
   1  -2   4   86.89    9.00
  -1  -2  -4   97.89    9.00
  -1  -2  -4   76.99    9.00
  -1   2  -4   80.09    9.00
  -1   2  -4  102.49    8.90
   1   2   4   84.99    8.90
   1   2   4   96.49    9.00
   2  -2   4 1754.22  153.28
   2  -2   4 1766.42  153.08
  -2  -2  -4 1648.44  153.28
   2   2   4 1656.63  153.08
  -2   2  -4 1283.17  153.08
   2   2   4 1280.87  153.18
  -2   2  -4 1701.33  153.08
  -3  -2  -4 1098.79  102.69
   3  -2   4 1069.09  102.69
   3  -2   4 1201.18  102.39
  -3  -2  -4  932.61  102.69
  -3  -2  -4 1078.79  102.39
  -3   2  -4  986.00  102.69
   3   2   4  973.30  102.79
   3   2   4 1010.00  102.69
  -3   2  -4 1185.08  102.69
  -4  -2  -4  655.33   64.79
   4  -2   4  678.93   64.69
  -4   2  -4  677.23   64.79
   4   2   4  650.13   64.69
   5  -2   4  377.86   43.50
  -5  -2  -4  474.35   43.70
   5   2   4  461.45   43.60
  -5   2  -4  474.45   43.70
  -6  -2  -4  349.67   28.20
   6   2   4  255.07   27.80
  -6   2  -4  248.98   27.90
   7  -2   4   67.59    8.20
  -7  -2  -4   69.29    8.40
   7   2   4   90.79    8.30
   8  -2   4  140.79   14.10
   8   2   4  132.39   14.00
  -8   2  -4  131.19   14.20
  -9  -2  -4   24.90    4.50
   9  -2   4   23.80    4.20
   9   2   4   32.20    4.30
  -9   2  -4   20.60    4.10
 -10  -2  -4   40.00    5.80
  10  -2   4   38.10    6.00
 -10   2  -4   33.00    5.70
  10   2   4   47.50    6.30
 -11  -2  -4   12.50    3.80
  11  -2   4    7.70    3.60
  11   2   4    6.20    3.90
 -11   2  -4    5.20    3.70
 -12   2  -4   26.90    5.60
  12   2   4   13.50    5.40
 -12  -3   4   24.10    5.20
  12  -3  -4   18.00    4.80
  11  -3  -4    3.20    3.50
 -11  -3   4    3.10    3.50
  11  -3  -4   -1.80    3.00
  11   3  -4   10.80    3.30
 -11   3   4    1.70    3.30
  11   3  -4    1.20    3.40
  10  -3  -4    1.10    2.40
 -10  -3   4    2.60    2.80
  10   3  -4    3.40    2.60
  10   3  -4    1.40    2.70
 -10   3   4    4.50    2.60
   9  -3  -4   12.50    2.80
  -9  -3   4    8.40    2.90
   9   3  -4   10.70    2.40
  -9   3   4    9.00    2.40
   9   3  -4    6.00    2.40
   8  -3  -4   24.60    3.40
  -8  -3   4   21.20    3.70
   8   3  -4   17.40    3.30
  -8   3   4   24.20    3.40
  -8   3   4   19.00    3.30
   8   3  -4   29.70    3.50
   7  -3  -4   10.10    1.90
  -7  -3   4   11.20    2.40
   7   3  -4   13.60    2.20
  -7   3   4    7.10    1.90
   7   3  -4   11.50    1.80
  -7   3   4    9.30    2.10
  -6  -3   4   -1.10    1.00
  -6  -3   4    1.80    1.30
   6  -3  -4   -0.20    1.10
   6  -3  -4    0.00    1.50
  -6   3   4    0.70    1.20
   6   3  -4   -0.40    0.80
   6   3  -4   -0.20    1.20
  -6   3   4    1.00    1.20
   5  -3  -4  194.78   19.50
  -5  -3   4  174.98   19.30
  -5  -3   4  211.18   19.60
   5   3  -4  190.38   19.30
  -5   3   4  187.08   19.50
   5   3  -4  205.68   19.60
  -5   3   4  218.18   19.40
   4  -3  -4    5.80    1.20
   4  -3  -4    8.20    1.20
  -4  -3   4    6.00    1.30
  -4  -3   4    9.90    1.30
  -4   3   4    7.80    1.60
  -4   3   4   10.50    1.30
  -4   3   4    8.20    1.40
   4   3  -4    5.00    1.40
   4   3  -4    8.90    1.50
   4   3  -4    6.40    1.00
   4   3  -4    5.30    1.20
   3  -3  -4  491.55   51.49
   3  -3  -4  558.14   51.69
  -3  -3   4  475.85   51.69
   3   3  -4  589.14   51.79
  -3   3   4  532.55   51.69
   3   3  -4  573.34   51.49
   3   3  -4  503.35   51.69
   2  -3  -4    4.20    1.00
   2  -3  -4    2.80    0.60
  -2  -3   4    3.80    0.90
   2  -3  -4    3.40    0.80
   2   3  -4    3.30    0.50
   2   3  -4    4.10    0.50
   2   3  -4    2.30    0.80
  -2   3   4    2.40    0.90
   1  -3  -4   93.49    9.40
   1  -3  -4   78.99    9.40
   1  -3  -4   84.49    9.50
  -1  -3   4  102.79    9.50
   1  -3  -4   99.99    9.30
  -1   3   4  107.09    9.30
   1   3  -4  100.09    9.50
   1   3  -4   92.39    9.20
   0  -3   4   83.49    8.60
   0  -3   4   86.29    8.70
   0  -3  -4   83.99    8.70
   0  -3  -4   98.59    8.70
   0  -3   4   79.29    8.70
   0   3  -4   78.69    8.70
   0   3  -4   80.09    8.70
   0   3  -4   97.19    8.60
   0   3   4  100.49    8.80
   1  -3   4  212.58   20.80
   1  -3   4  212.98   20.80
  -1  -3  -4  177.68   20.80
   1  -3   4  239.18   20.80
  -1  -3  -4  220.68   20.90
  -1  -3  -4  212.78   20.80
   1   3   4  182.08   20.80
  -1   3  -4  234.48   20.80
  -1   3  -4  219.98   20.80
   1   3   4  216.18   20.80
   1   3   4  215.88   20.90
  -2  -3  -4  283.87   29.20
  -2  -3  -4  268.37   29.10
   2   3   4  364.96   29.00
   2   3   4  330.77   29.30
  -2   3  -4  271.17   29.10
  -2   3  -4  274.07   29.00
  -2   3  -4  298.17   29.10
   3  -3   4  580.24   57.19
  -3  -3  -4  579.94   57.29
   3  -3   4  613.84   56.99
  -3  -3  -4  556.34   57.09
   3   3   4  577.04   56.89
   3   3   4  642.14   57.29
  -3   3  -4  593.34   57.19
   3   3   4  567.14   57.19
   4  -3   4  119.49   10.80
   4  -3   4  108.59   11.10
  -4  -3  -4  106.49   11.20
  -4   3  -4   96.59   11.20
   4   3   4  107.59   11.10
  -4   3  -4  114.29   10.80
  -5  -3  -4  255.47   24.80
   5  -3   4  253.47   24.70
  -5   3  -4  259.67   24.80
  -5   3  -4  234.28   24.20
   6  -3   4   15.30    2.60
  -6  -3  -4   23.50    3.00
   6   3   4   16.50    2.60
  -6   3  -4   12.80    2.60
   7  -3   4   49.20    6.20
  -7  -3  -4   47.00    6.40
   7   3   4   66.49    6.30
  -7   3  -4   47.10    6.30
  -8  -3  -4   61.79    7.30
   8  -3   4   52.99    7.00
   8   3   4   65.09    7.10
  -8   3  -4   57.39    7.20
  -9  -3  -4  103.89   11.00
   9  -3   4   96.99   10.90
  -9   3  -4   90.79   11.00
 -10  -3  -4   15.10    4.00
  10  -3   4   14.00    3.60
  10   3   4   13.20    3.70
 -10   3  -4   13.70    3.90
  11  -3   4   81.89   10.30
  11   3   4   67.19   10.10
 -11   3  -4   96.09   10.70
  12   3   4   33.10    6.10
 -12   3  -4   29.60    6.10
  12  -4  -4    9.30    4.30
 -12  -4   4   14.50    5.10
  11  -4  -4  249.28   26.20
 -11  -4   4  277.67   26.40
  11  -4  -4  245.78   26.10
  11   4  -4  249.97   26.10
 -11   4   4  265.17   26.10
  10  -4  -4    1.30    2.60
 -10  -4   4   -2.40    2.80
 -10   4   4    1.00    2.60
  10   4  -4    3.60    2.60
  10   4  -4   -4.80    2.50
   9  -4  -4  334.77   33.40
  -9   4   4  345.17   33.50
   9   4  -4  309.27   33.40
   9   4  -4  350.06   33.30
  -9   4   4  347.27   33.30
  -8  -4   4    2.20    2.20
   8  -4  -4    2.30    1.50
   8   4  -4    0.90    1.50
   8   4  -4    1.00    1.80
  -8   4   4    2.10    1.80
  -8   4   4   -1.40    1.60
   7  -4  -4  548.05   48.60
  -7   4   4  440.96   48.50
  -7   4   4  517.65   48.40
   7   4  -4  479.55   48.60
  -6  -4   4    7.90    1.70
   6  -4  -4    9.90    1.80
   6  -4  -4   10.90    2.00
  -6  -4   4    8.30    1.90
  -6   4   4    9.80    1.90
   6   4  -4    8.00    1.80
  -6   4   4   12.90    1.90
  -5  -4   4  957.30  100.29
  -5  -4   4  978.20   99.99
   5  -4  -4  930.71  100.09
   5  -4  -4 1074.99  100.29
  -5   4   4  971.40  100.29
   5   4  -4 1144.79   99.99
   5   4  -4 1181.48  100.39
   4  -4  -4   25.70    2.80
  -4  -4   4   20.80    2.80
   4  -4  -4   19.40    2.50
  -4  -4   4   19.40    2.40
   4   4  -4   26.20    2.90
  -4   4   4   22.30    2.80
   4   4  -4   21.40    2.30
  -4   4   4   25.50    2.50
   3  -4  -4  924.11   94.49
  -3  -4   4 1031.80   94.29
   3  -4  -4 1110.09   94.29
   3  -4  -4 1005.50   94.59
   3   4  -4  963.40   94.19
   3   4  -4  927.51   94.49
   3   4  -4  922.51   94.49
  -3   4   4  971.40   94.59
  -3   4   4 1024.70   94.29
  -3   4   4  871.51   94.49
   2  -4  -4  142.89   14.70
  -2  -4   4  153.88   14.70
   2   4  -4  136.99   14.60
  -2   4   4  160.18   14.70
  -1  -4   4 1333.57  155.98
   1  -4  -4 1693.33  155.98
   1  -4  -4 1675.03  155.78
  -1  -4   4 1631.04  155.98
   1  -4  -4 1385.86  155.98
   1  -4  -4 1677.13  155.78
   1   4  -4 1823.82  155.98
   1   4  -4 1804.02  155.78
  -1   4   4 1491.35  155.98
   0  -4  -4    5.00    1.00
   0  -4  -4    6.90    0.90
   0  -4   4    6.00    0.80
   0  -4  -4    7.60    0.90
   0  -4   4    5.40    1.10
   0  -4   4    5.10    1.00
   0  -4  -4    4.50    0.90
   0   4  -4    4.50    0.90
   0   4  -4    4.60    1.00
   0   4  -4    5.90    0.80
   0   4   4    5.10    1.00
   1  -4   4 1797.52  154.68
   1  -4   4 1527.05  154.78
  -1  -4  -4 1742.73  154.78
  -1  -4  -4 1686.53  154.78
   1  -4   4 1362.56  154.68
  -1   4  -4 1393.66  154.68
   1   4   4 1761.12  154.78
   1   4   4 1539.55  154.78
  -2  -4  -4   12.90    1.80
  -2  -4  -4   12.70    1.60
  -2  -4  -4    9.00    1.60
   2  -4   4   13.90    1.60
   2  -4   4   12.70    1.70
  -2   4  -4   14.30    1.50
  -2   4  -4   11.50    1.60
   2   4   4   10.70    1.80
   2   4   4    9.50    1.60
   2   4   4   16.10    1.60
  -2   4  -4   10.30    1.60
  -3  -4  -4 1389.26  129.29
   3  -4   4 1159.68  129.09
   3  -4   4 1304.17  129.29
  -3  -4  -4 1335.37  129.09
  -3  -4  -4 1326.87  129.39
  -3   4  -4 1361.16  129.39
  -3   4  -4 1412.46  129.29
  -3   4  -4 1200.78  129.19
  -3   4  -4 1401.16  129.19
   3   4   4 1485.95  129.19
   3   4   4 1322.77  129.39
   4  -4   4   44.30    4.70
  -4  -4  -4   49.30    5.20
  -4  -4  -4   44.10    4.60
   4  -4   4   36.80    4.90
  -4   4  -4   49.80    5.30
   4   4   4   50.89    5.00
   4   4   4   54.79    4.70
  -4   4  -4   40.00    4.60
  -5  -4  -4  784.32   73.29
   5  -4   4  666.73   72.79
  -5   4  -4  822.02   72.89
   5   4   4  799.02   73.19
   5   4   4  698.53   72.79
  -6  -4  -4   24.30    3.80
   6  -4   4   25.20    3.10
   6  -4   4   31.40    3.80
   6   4   4   30.40    3.70
  -6   4  -4   24.40    3.90
  -6   4  -4   29.40    3.00
   7  -4   4  703.83   65.69
  -7   4  -4  641.14   65.69
  -7   4  -4  671.53   64.99
  -8  -4  -4    7.70    2.80
   8  -4   4   10.20    2.70
  -8   4  -4    7.70    2.80
   8   4   4   10.30    2.50
   9  -4   4  202.08   20.20
  -9  -4  -4  197.78   20.30
  -9   4  -4  188.98   20.20
  10  -4   4   -3.30    2.90
 -10  -4  -4    2.10    2.70
 -10   4  -4   -2.70    3.10
  10   4   4    2.40    2.70
 -11  -4  -4  174.08   16.00
  11  -4   4  125.99   15.50
  11   4   4  111.29   15.10
 -11   4  -4  156.88   15.50
  12  -5  -4   -0.70    4.20
 -12  -5   4    4.40    4.90
  11  -5  -4   14.70    3.90
 -11  -5   4   19.60    4.60
  11   5  -4   10.40    4.00
  10  -5  -4    0.30    2.50
 -10  -5   4    2.90    3.00
  10   5  -4   -0.60    2.60
 -10   5   4   -0.70    2.60
  10   5  -4    4.70    2.70
 -10   5   4   -0.10    2.60
  -9  -5   4   22.40    4.10
  -9   5   4   30.90    4.10
   9   5  -4   24.10    3.80
  -9   5   4   20.80    3.70
   9   5  -4   27.30    3.70
  -8  -5   4    3.10    1.80
   8  -5  -4    2.70    1.70
   8   5  -4    0.60    1.80
  -8   5   4    1.00    1.70
  -8   5   4    2.80    1.90
   8   5  -4    0.70    1.50
  -7  -5   4   58.39    6.00
  -7  -5   4   46.70    5.90
   7  -5  -4   43.80    5.80
   7   5  -4   56.29    5.50
  -7   5   4   54.79    5.60
   7   5  -4   46.10    5.80
  -7   5   4   43.30    5.90
   6  -5  -4   16.80    2.30
  -6  -5   4   12.80    2.00
  -6  -5   4   13.10    2.40
   6  -5  -4   11.30    2.10
  -6   5   4   11.50    2.10
   6   5  -4   12.70    1.90
   6   5  -4   11.70    2.10
   5  -5  -4   10.40    1.80
  -5  -5   4   10.00    1.40
   5  -5  -4    8.70    1.60
  -5  -5   4    9.90    1.90
  -5   5   4    6.90    1.70
  -5   5   4   12.00    1.60
   5   5  -4    8.10    1.30
   5   5  -4   11.60    1.80
   4  -5  -4   11.70    1.70
  -4  -5   4   14.30    2.00
  -4  -5   4   10.60    1.40
   4  -5  -4   11.20    1.70
   4   5  -4   10.60    1.80
  -4   5   4   12.00    2.00
   4   5  -4   10.80    1.30
  -4   5   4   11.20    1.50
  -3  -5   4    3.10    1.00
   3  -5  -4    1.50    0.80
   3  -5  -4    2.20    1.00
   3  -5  -4    4.60    0.60
   3   5  -4    2.80    1.00
   3   5  -4    5.00    1.00
  -3   5   4    0.90    1.00
  -3   5   4    3.10    1.20
  -3   5   4    2.80    0.50
   2  -5  -4   12.70    2.20
   2  -5  -4   17.50    2.10
  -2  -5   4   19.80    2.20
  -2  -5   4   16.80    2.40
   2   5  -4   12.80    2.20
   2   5  -4   21.10    2.20
  -2   5   4   19.20    2.40
  -2   5   4   13.90    2.20
   1  -5  -4  196.78   17.90
  -1  -5   4  154.68   18.10
   1  -5  -4  197.98   17.90
   0  -5   4    2.90    0.50
   0  -5  -4    2.30    0.90
   0  -5  -4    3.60    0.70
   0  -5   4    4.10    1.00
   0   5  -4    2.90    0.60
   0   5   4    1.60    0.80
   0   5  -4    4.10    0.90
   0   5  -4    2.10    0.90
   1  -5   4  175.58   17.90
  -1  -5  -4  203.28   18.00
  -1  -5  -4  153.48   18.00
   1  -5   4  186.58   18.00
  -1   5  -4  197.18   18.00
   1   5   4  172.48   18.00
  -1   5  -4  197.48   17.90
  -2  -5  -4   25.10    2.70
  -2  -5  -4   27.60    2.90
   2  -5   4   23.80    2.70
   2  -5   4   21.20    2.70
   2  -5   4   23.80    2.70
  -2  -5  -4   24.90    2.90
   2   5   4   30.20    2.80
  -2   5  -4   22.10    2.80
   2   5   4   20.80    2.80
  -2   5  -4   22.60    2.70
   2   5   4   23.60    3.00
  -2   5  -4   22.90    2.70
  -3  -5  -4  747.53   73.79
   3  -5   4  735.63   73.99
   3  -5   4  649.93   73.79
   3   5   4  798.82   73.89
  -3   5  -4  761.72   73.89
  -3   5  -4  770.72   73.99
  -3   5  -4  821.82   74.19
  -3   5  -4  739.63   73.89
   3   5   4  847.72   74.19
   4  -5   4   93.49    8.90
  -4  -5  -4   76.99    8.90
   4  -5   4   80.29    8.60
  -4  -5  -4   83.69    8.50
   4   5   4   87.69    8.60
   4   5   4   87.99    8.80
  -4   5  -4   89.99    9.00
  -4   5  -4   89.79    8.60
  -5  -5  -4  322.67   29.60
  -5  -5  -4  271.57   29.00
   5  -5   4  295.47   29.10
   5  -5   4  343.77   29.50
   5   5   4  277.37   29.00
  -5   5  -4  265.47   29.10
   5   5   4  302.47   29.40
  -5   5  -4  330.97   29.60
   6  -5   4   15.50    2.40
   6  -5   4   13.70    2.50
  -6  -5  -4   21.40    3.10
   6   5   4   16.00    2.00
   6   5   4   12.60    2.50
  -6   5  -4   16.40    2.90
   6   5   4   16.20    2.00
  -6   5  -4   21.60    2.20
   7  -5   4  243.08   23.40
  -7   5  -4  231.28   23.40
  -7   5  -4  226.28   22.70
  -8  -5  -4   24.90    4.00
   8  -5   4   26.20    4.10
  -8   5  -4   19.40    4.00
   9  -5   4   99.99   11.20
  -9  -5  -4   89.29   11.20
   9   5   4  120.49   11.00
  -9   5  -4   84.19   11.10
 -10  -5  -4   22.00    4.40
  10  -5   4   19.10    4.30
 -10   5  -4   20.70    4.20
  10   5   4   18.60    3.80
  11  -5   4   80.09    9.50
 -11  -5  -4   71.39    9.20
  11   5   4   48.50    8.10
 -11   5  -4   64.59    9.10
  12  -6  -4   52.19    7.60
  11  -6  -4   86.09   12.30
 -11  -6   4  125.39   12.80
  11   6  -4  113.59   12.50
 -10  -6   4  123.79   13.50
  10  -6  -4  123.29   13.30
  10   6  -4  124.99   13.20
  10   6  -4  113.59   13.20
   9  -6  -4  226.18   20.60
  -9  -6   4  189.68   20.70
   9   6  -4  204.08   20.20
  -9   6   4  193.68   20.50
  -9   6   4  208.38   20.30
   9   6  -4  187.88   20.50
   8  -6  -4  144.09   14.30
  -8  -6   4  155.98   14.60
  -8   6   4  134.19   14.00
  -8   6   4  138.59   14.30
   8   6  -4  131.49   13.90
   8   6  -4  130.29   14.30
  -7  -6   4  555.74   65.39
   7  -6  -4  740.63   65.49
   7   6  -4  762.62   65.09
  -7   6   4  620.24   65.09
  -6  -6   4  286.77   26.70
  -6  -6   4  310.67   27.20
   6  -6  -4  242.38   26.80
   6   6  -4  245.88   27.00
   6   6  -4  296.17   26.70
  -6   6   4  264.67   26.70
  -6   6   4  267.77   27.00
  -5  -6   4  690.13   61.29
   5  -6  -4  653.03   61.29
  -5  -6   4  546.65   60.89
   5  -6  -4  605.34   60.99
  -5   6   4  663.83   61.29
  -5   6   4  598.34   60.89
   5   6  -4  668.33   60.89
   5   6  -4  613.54   61.19
  -4  -6   4  454.85   44.60
   4  -6  -4  480.45   44.50
  -4  -6   4  403.46   44.20
   4  -6  -4  464.05   44.20
  -4   6   4  516.55   44.70
   4   6  -4  405.36   44.10
   4   6  -4  483.85   44.60
  -3  -6   4  690.93   64.89
   3  -6  -4  676.63   64.89
  -3   6   4  637.04   64.99
  -2  -6   4  787.92   72.59
  -2  -6   4  735.93   72.49
   2  -6  -4  726.33   72.59
   2  -6  -4  730.83   72.49
   2   6  -4  737.73   72.59
  -2   6   4  787.92   72.59
  -2   6   4  753.72   72.69
   2   6  -4  724.63   72.49
  -1  -6   4 1802.22  169.08
   1  -6  -4 1736.53  169.08
  -1  -6   4 1746.83  169.48
   1  -6  -4 1723.93  169.38
   1  -6  -4 1573.24  169.08
  -1  -6   4 1654.53  169.38
   1   6  -4 1862.01  169.48
  -1   6   4 1869.81  169.48
   1   6  -4 1897.71  169.08
   1   6  -4 1652.63  169.38
   0  -6  -4  252.17   27.50
   0  -6  -4  327.67   27.50
   0  -6  -4  255.97   27.50
   0  -6   4  296.47   27.30
   0  -6  -4  290.27   27.30
   0  -6   4  248.18   27.50
   0  -6   4  297.07   27.50
   1  -6   4  988.00   94.39
   1  -6   4 1088.99   94.29
  -1  -6  -4 1049.20   94.39
   1  -6   4  807.32   94.39
   1   6   4  953.80   94.39
   1   6   4 1018.20   94.49
  -1   6  -4 1002.80   94.29
   1   6   4  890.71   94.39
  -2  -6  -4  471.55   52.59
   2  -6   4  558.24   52.69
   2  -6   4  485.25   52.59
  -2  -6  -4  619.84   52.79
   2   6   4  446.06   52.69
   2   6   4  586.14   52.69
  -2   6  -4  570.64   52.69
  -2   6  -4  614.34   52.69
   2   6   4  532.85   52.69
   3  -6   4  474.45   44.80
  -3  -6  -4  434.66   44.80
  -3  -6  -4  456.85   44.60
  -3   6  -4  491.85   44.90
   3   6   4  406.66   44.70
   3   6   4  474.25   44.70
   3   6   4  489.65   44.90
  -3   6  -4  445.26   44.70
  -3   6  -4  464.65   44.60
   4  -6   4  150.18   17.20
   4  -6   4  186.28   17.50
  -4  -6  -4  156.98   17.40
   4   6   4  171.08   17.40
   4   6   4  188.08   17.20
  -4   6  -4  189.68   17.60
  -4   6  -4  184.48   17.20
   5  -6   4  195.18   19.00
  -5  -6  -4  176.58   19.10
  -5  -6  -4  170.88   18.60
   5  -6   4  188.28   18.80
  -5   6  -4  223.88   19.30
   5   6   4  205.68   19.00
  -5   6  -4  205.78   18.80
   5   6   4  169.58   18.70
  -6  -6  -4  110.49   10.00
   6  -6   4   79.39    9.60
   6  -6   4   86.19    9.30
   6   6   4   87.89    9.10
  -6   6  -4   76.99    9.70
  -6   6  -4  106.79    9.20
  -7  -6  -4  194.98   17.00
   7  -6   4  154.98   16.70
  -7   6  -4  143.49   16.70
  -7   6  -4  143.29   16.10
   7   6   4  170.58   16.00
   7   6   4  182.98   16.70
  -8  -6  -4   41.50    6.40
  -8   6  -4   50.59    6.30
   9  -6   4   46.10    6.50
  -9  -6  -4   45.60    6.80
  -9   6  -4   38.60    6.20
   9   6   4   57.09    6.50
 -10  -6  -4   38.30    6.10
  10  -6   4   41.70    5.90
  10   6   4   43.70    5.90
 -10   6  -4   30.00    5.50
 -11  -6  -4   82.59   10.70
  11  -6   4   89.79   10.80
  11   6   4   62.49   10.20
 -11   6  -4   88.19   10.70
  11  -7  -4    4.20    3.40
 -11  -7   4    3.70    4.20
 -11   7   4    2.90    3.70
 -10  -7   4    5.80    3.10
  10  -7  -4    6.20    3.00
  10   7  -4    2.40    3.10
 -10   7   4   -0.30    2.90
   9  -7  -4    0.60    2.20
  -9  -7   4    0.90    2.80
   9   7  -4   -1.00    2.20
   9   7  -4    0.20    1.90
  -9   7   4    0.70    2.30
  -9   7   4   -2.10    2.10
   8  -7  -4    0.60    1.70
  -8  -7   4    1.10    2.30
  -8   7   4    1.20    1.70
   8   7  -4    1.10    1.50
   8   7  -4    2.00    1.90
  -8   7   4    2.60    2.00
  -7  -7   4    1.10    1.80
   7  -7  -4    0.60    1.50
   7   7  -4    0.80    1.40
  -7   7   4   -0.70    1.20
  -7   7   4   -1.30    1.50
   7   7  -4   -0.40    1.10
  -6  -7   4   25.90    3.30
   6  -7  -4   26.10    3.40
  -6  -7   4   22.70    3.50
   6  -7  -4   33.60    3.70
   6   7  -4   26.70    2.90
   6   7  -4   20.90    3.60
  -6   7   4   24.60    3.20
  -6   7   4   28.30    3.70
  -5  -7   4    4.10    1.80
  -5  -7   4    4.60    1.00
   5  -7  -4    4.80    1.10
   5  -7  -4    4.00    1.30
   5   7  -4    4.50    1.40
  -5   7   4    2.90    1.00
   5   7  -4    5.30    0.80
  -5   7   4    3.90    1.60
  -4  -7   4   53.19    6.50
   4  -7  -4   72.79    6.60
   4   7  -4   71.89    6.70
  -4   7   4   57.79    6.60
  -4   7   4   56.69    6.00
  -3  -7   4   17.60    2.30
   3  -7  -4   17.00    2.20
   3   7  -4   14.30    2.20
  -3   7   4   11.20    2.10
  -2  -7   4   81.09    8.10
   2  -7  -4   77.59    8.10
  -1  -7   4  246.58   24.70
   1  -7  -4  260.27   24.30
   1  -7  -4  236.78   24.50
  -1  -7   4  253.77   24.30
  -1  -7   4  240.98   24.60
   1  -7  -4  253.77   24.70
   1   7  -4  255.57   24.70
   1   7  -4  256.97   24.60
   0  -7   4  318.47   27.50
   0  -7   4  286.07   27.20
   0  -7  -4  295.07   27.50
   0  -7   4  253.27   27.30
   0   7  -4  274.97   27.30
   0   7   4  289.47   27.50
   0   7   4  294.07   27.20
   0   7  -4  235.58   27.10
   0   7  -4  276.57   27.40
   1  -7   4   48.50    5.70
  -1  -7  -4   57.69    5.80
   1  -7   4   62.29    5.60
   1  -7   4   52.29    5.60
  -1  -7  -4   42.30    5.50
  -1   7  -4   52.49    5.60
  -1   7  -4   58.09    5.50
   1   7   4   52.19    5.70
  -1   7  -4   62.79    5.70
  -2  -7  -4   47.30    5.70
   2  -7   4   56.89    5.80
  -2   7  -4   49.90    5.70
   2   7   4   53.69    5.90
   2   7   4   68.09    5.80
  -3  -7  -4    0.60    0.90
   3  -7   4    1.00    1.10
  -3  -7  -4   -0.20    0.80
   3  -7   4    0.80    0.80
   3   7   4    0.00    0.80
   3   7   4   -0.20    0.80
   4  -7   4   79.39   10.30
   4  -7   4  118.29   10.60
  -4  -7  -4  109.59   10.60
   4   7   4  109.59   10.50
   4   7   4  119.09   10.40
  -4   7  -4   82.59   10.50
  -5  -7  -4  109.99    9.90
   5  -7   4  113.69    9.90
   5  -7   4   75.59    9.50
  -5  -7  -4   87.99    9.40
   5   7   4  100.79    9.70
  -5   7  -4   91.49    9.90
   5   7   4   86.89    9.40
   6  -7   4   54.49    7.60
  -6  -7  -4   83.59    7.30
  -6  -7  -4   82.59    8.00
  -6   7  -4   53.69    7.70
   6   7   4   66.69    7.20
   6   7   4   77.59    7.70
   7  -7   4  203.68   21.50
   7   7   4  245.88   21.50
  -7   7  -4  180.68   21.40
   7   7   4  220.28   20.90
  -8  -7  -4   97.99   11.10
   8  -7   4  101.59   11.10
   8   7   4  102.49   10.80
  -8   7  -4   97.49   11.00
  -9  -7  -4   27.20    4.80
   9  -7   4   30.00    5.00
  -9   7  -4   29.80    4.90
   9   7   4   35.40    4.80
  10  -7   4    9.60    3.60
 -10  -7  -4    7.90    3.80
  10   7   4   11.10    3.60
 -10   7  -4   14.70    3.80
  11  -7   4   10.00    4.80
 -11  -7  -4   10.50    4.40
 -11   7  -4   13.60    4.70
  11   7   4   19.70    4.70
  11  -8  -4    7.20    3.80
 -11  -8   4    6.00    4.40
 -11   8   4   -5.10    3.70
  10  -8  -4  203.28   20.80
 -10  -8   4  211.18   21.20
 -10   8   4  202.58   20.90
  10   8  -4  191.58   20.80
  -9  -8   4    8.70    3.30
   9  -8  -4   23.40    3.60
  -9   8   4   11.60    3.60
   9   8  -4   18.10    3.40
  -8  -8   4  258.47   26.40
   8   8  -4  282.87   25.80
   8   8  -4  241.58   26.20
   7  -8  -4   18.30    3.00
  -7  -8   4   15.40    3.00
   7   8  -4   18.20    3.00
  -7   8   4   18.10    3.00
  -6  -8   4  434.66   39.70
   6  -8  -4  479.65   40.20
  -6  -8   4  385.26   40.10
  -6   8   4  431.46   40.20
  -6   8   4  422.96   39.60
   6   8  -4  349.96   40.00
   6   8  -4  359.66   39.60
   5  -8  -4    7.30    1.70
  -5  -8   4    9.40    2.10
  -5  -8   4    8.00    1.20
   5   8  -4    6.30    1.80
  -5   8   4    8.20    1.20
   5   8  -4    9.00    1.20
  -5   8   4    9.00    2.10
  -4  -8   4  648.24   59.89
   4  -8  -4  625.04   59.89
   4   8  -4  630.04   59.89
  -4   8   4  556.34   59.99
   3  -8  -4    7.70    1.50
  -3  -8   4   10.90    1.80
  -3   8   4   13.40    2.20
   3   8  -4   12.60    2.00
  -2  -8   4 1986.30  179.48
   2  -8  -4 1907.21  179.38
  -2   8   4 1667.53  179.48
   2   8  -4 1858.81  179.48
   1  -8  -4    7.90    0.90
   1  -8  -4    7.20    1.30
  -1  -8   4    7.60    1.00
  -1  -8   4    6.70    1.30
   1   8  -4    8.90    1.60
  -1   8   4    7.40    1.60
   0  -8   4 1228.58  114.19
   0  -8  -4 1154.48  114.19
   0  -8  -4 1266.17  114.49
   0  -8   4 1169.68  114.39
   0  -8  -4 1189.78  114.39
   0   8   4 1068.49  114.19
   0   8   4 1237.58  114.59
   0   8  -4 1053.79  114.19
   0   8  -4 1280.77  114.49
   0   8  -4 1175.08  114.49
   1  -8   4   23.40    3.10
  -1  -8  -4   31.90    3.50
   1  -8   4   31.00    3.10
  -1  -8  -4   25.60    3.10
   1  -8   4   29.70    3.60
  -1   8  -4   29.40    3.30
   1   8   4   25.00    3.30
  -1   8  -4   27.80    3.40
   1   8   4   32.90    3.40
  -1   8  -4   26.50    3.10
   2  -8   4 1317.47  134.09
   2  -8   4 1498.35  134.19
   2  -8   4 1425.96  134.29
   2   8   4 1336.67  134.19
   2   8   4 1453.45  134.29
  -2   8  -4 1288.27  134.19
  -3  -8  -4   29.10    3.20
   3  -8   4   32.60    3.40
  -3  -8  -4   18.10    3.00
   3  -8   4   23.10    3.10
   3   8   4   24.80    3.10
  -3   8  -4   21.50    3.00
   3   8   4   27.40    3.10
  -4  -8  -4 1131.59  113.69
   4  -8   4 1237.18  113.79
   4  -8   4 1269.07  113.69
  -4   8  -4 1217.78  113.89
  -4   8  -4 1013.50  113.59
   5  -8   4    9.50    2.00
  -5  -8  -4    7.00    1.90
   5  -8   4   11.00    2.00
  -5  -8  -4    9.50    1.70
  -5   8  -4    5.50    2.00
  -5   8  -4    9.00    1.80
   5   8   4    6.90    1.80
   6  -8   4  562.44   61.59
  -6  -8  -4  673.43   61.79
  -6  -8  -4  559.44   61.19
   6   8   4  736.63   61.69
   7  -8   4   10.40    2.40
  -7  -8  -4   13.20    2.90
  -7   8  -4    7.30    2.50
   7   8   4    8.40    2.20
   7   8   4    7.70    1.80
  -7   8  -4    9.50    2.00
   8  -8   4  153.28   15.70
  -8  -8  -4  157.08   15.80
   8   8   4  146.49   15.40
  -8   8  -4  138.69   15.60
  -9  -8  -4   37.60    5.40
   9  -8   4   28.70    4.80
   9   8   4   30.60    4.60
  -9   8  -4   27.20    4.90
 -10  -8  -4  121.79   15.20
  10  -8   4  138.79   15.30
  10   8   4  150.58   15.20
 -10   8  -4  138.99   15.20
 -11  -8  -4    5.20    4.20
  11  -8   4    8.80    4.80
 -11   8  -4    1.10    4.50
  11   8   4    5.90    4.50
 -11  -9   4   -4.30    5.10
  11  -9  -4   -1.90    3.80
 -11   9   4    1.30    4.30
  10  -9  -4   -1.00    2.90
 -10  -9   4   -4.00    3.40
 -10   9   4    1.00    3.40
  10   9  -4    2.90    3.10
   9  -9  -4    3.10    2.60
  -9  -9   4    0.50    3.30
  -9   9   4    5.30    2.90
  -8  -9   4    3.00    2.80
   8  -9  -4    2.20    2.20
   8   9  -4    2.50    2.20
  -8   9   4    2.40    2.20
   7  -9  -4   37.50    4.40
  -7  -9   4   26.60    4.10
  -7   9   4   25.40    3.50
   7   9  -4   29.50    3.30
   7   9  -4   23.50    3.90
  -7   9   4   29.60    4.50
  -6  -9   4   29.90    3.50
  -6  -9   4   27.30    4.30
   6  -9  -4   35.40    4.10
   6   9  -4   24.90    4.10
  -6   9   4   33.90    3.30
  -6   9   4   31.00    3.30
  -6   9   4   35.50    4.50
   6   9  -4   24.40    3.20
   5  -9  -4   30.60    4.20
  -5  -9   4   34.20    4.40
   5   9  -4   32.70    4.30
  -5   9   4   40.00    4.60
   4  -9  -4  119.19   12.60
  -4   9   4  116.09   12.80
   4   9  -4  139.69   12.80
  -3  -9   4    8.60    1.60
   3  -9  -4    7.70    1.40
   3   9  -4    5.90    1.50
  -3   9   4    8.90    1.90
  -2  -9   4   51.79    6.10
   2  -9  -4   61.69    6.10
  -2   9   4   60.49    6.30
   2   9  -4   54.59    6.20
   1  -9  -4   17.80    2.30
  -1  -9   4   18.40    1.90
  -1  -9   4   15.20    2.30
  -1   9   4   17.30    2.60
   1   9  -4   17.30    2.50
   0  -9  -4  246.48   26.90
   0  -9  -4  250.87   27.20
   0  -9   4  312.27   27.00
   0  -9   4  273.67   27.10
   0   9  -4  319.77   27.00
   0   9  -4  294.97   27.30
   0   9   4  232.48   27.00
   0   9   4  291.47   27.30
   1  -9   4    1.20    0.80
  -1  -9  -4    0.80    0.80
   1  -9   4    0.90    0.80
  -1  -9  -4    1.60    0.80
   1   9   4    1.80    1.20
  -1   9  -4   -0.30    0.90
  -1   9  -4    1.00    0.80
   1   9   4    1.60    1.10
   2  -9   4  174.28   16.30
  -2  -9  -4  151.88   16.20
  -2  -9  -4  175.98   16.50
   2  -9   4  149.79   16.20
  -2   9  -4  157.98   16.30
   2   9   4  160.68   16.30
   2   9   4  192.68   16.50
  -2   9  -4  153.48   16.20
  -3  -9  -4   42.20    4.50
   3  -9   4   33.00    4.50
  -3  -9  -4   38.10    4.50
   3   9   4   37.20    4.40
   3   9   4   39.60    4.50
  -3   9  -4   44.00    4.50
  -4  -9  -4  199.38   19.80
  -4  -9  -4  201.88   19.70
  -4   9  -4  210.78   20.00
   4   9   4  210.38   19.80
   4   9   4  175.18   19.70
  -4   9  -4  197.88   19.70
   5  -9   4    4.00    1.70
  -5  -9  -4    7.90    2.00
  -5  -9  -4    4.80    1.80
  -5   9  -4    8.60    1.80
  -5   9  -4    9.00    2.10
   5   9   4    6.30    1.50
   5   9   4    6.90    1.70
  -6  -9  -4   87.29    9.70
   6  -9   4   89.69    9.60
  -6   9  -4   73.19    9.60
   6   9   4   96.99    9.50
   6   9   4   95.39    9.30
  -6   9  -4   87.69    9.40
  -7  -9  -4   -1.20    2.00
   7  -9   4   -2.70    1.90
   7   9   4    0.70    1.60
  -7   9  -4    1.30    2.20
   7   9   4   -0.80    1.70
  -7   9  -4    2.30    1.60
   8  -9   4   94.99   10.70
  -8  -9  -4   81.59   10.70
   8   9   4  116.59   10.80
  -8   9  -4   89.19   10.70
   9  -9   4    1.20    3.10
  -9  -9  -4   -0.40    3.00
   9   9   4   -0.70    2.60
  -9   9  -4   -2.70    3.10
 -10  -9  -4   22.70    4.90
  10  -9   4   27.40    4.90
  10   9   4   25.50    4.70
 -10   9  -4   20.20    4.80
  11   9   4    6.10    4.80
 -11   9  -4   25.20    5.50
  11 -10  -4   48.70    7.30
 -11  10   4   48.90    7.50
  10 -10  -4   53.29    8.10
 -10 -10   4   61.19    8.80
  10  10  -4   68.59    8.70
 -10  10   4   55.29    8.60
   9 -10  -4   45.50    6.50
  -9 -10   4   42.30    6.40
   9  10  -4   40.20    5.80
  -9  10   4   44.10    6.20
  -8 -10   4  129.49   14.10
   8  10  -4  132.49   13.90
   7  10  -4  101.49   10.40
   7  10  -4  108.19   11.10
   6 -10  -4  652.03   58.49
  -6 -10   4  505.75   58.39
  -6  10   4  637.14   58.59
   5 -10  -4  154.58   13.70
  -5 -10   4  132.09   13.70
   5  10  -4  115.39   13.60
  -4 -10   4  467.65   48.00
   4 -10  -4  503.55   48.10
   4  10  -4  503.85   48.10
   3 -10  -4  196.88   19.40
  -3 -10   4  196.88   19.40
  -3  10   4  228.18   19.70
   3  10  -4  162.18   19.40
   2 -10  -4  715.53   71.39
  -2 -10   4  774.02   71.39
   2  10  -4  704.63   71.49
  -2  10   4  745.03   71.59
  -1 -10   4  270.57   27.50
  -1 -10   4  296.57   27.20
   1 -10  -4  270.57   27.50
  -1  10   4  288.37   27.70
   1  10  -4  272.37   27.60
   0 -10   4 1269.97  117.59
   0 -10   4 1327.37  117.49
   0 -10  -4 1305.37  117.39
   0 -10  -4 1356.76  117.69
   0  10  -4 1162.08  117.69
   0  10   4 1030.90  117.39
   0  10  -4 1052.89  117.39
  -1 -10  -4   83.49    7.30
   1 -10   4   71.39    7.40
   1  10   4   72.99    7.60
   1  10   4   66.99    7.60
  -1  10  -4   72.59    7.60
  -1  10  -4   64.59    7.40
   2 -10   4  527.25   52.29
  -2 -10  -4  530.25   52.19
   2 -10   4  520.15   52.29
  -2  10  -4  559.34   52.39
   2  10   4  603.04   52.49
   2  10   4  475.35   52.39
  -2  10  -4  549.95   52.29
  -3 -10  -4  172.68   17.80
   3  10   4  198.78   17.90
   3  10   4  169.38   17.80
  -3  10  -4  175.78   17.80
   4 -10   4  166.48   15.30
  -4 -10  -4  144.29   15.20
  -4  10  -4  125.09   15.10
   4  10   4  157.08   15.20
  -4  10  -4  143.99   15.30
   4  10   4  170.38   15.20
  -5 -10  -4  178.28   18.10
   5 -10   4  147.49   18.00
  -5  10  -4  204.28   18.10
   5  10   4  164.18   17.90
   5  10   4  177.18   18.00
  -5  10  -4  212.88   18.40
  -6 -10  -4  106.69   11.00
   6 -10   4   97.19   10.90
  -6  10  -4   88.99   11.00
  -6  10  -4  107.39   10.80
   6  10   4  118.89   10.80
   6  10   4   96.49   10.70
  -7  10  -4   80.69   10.10
  -7  10  -4   84.99    9.60
   7  10   4  101.39    9.70
   8 -10   4   33.50    5.10
  -8 -10  -4   33.40    5.10
  -8  10  -4   33.00    4.90
   9 -10   4   11.80    3.80
  -9 -10  -4    8.50    3.20
   9  10   4    6.80    3.20
  -9  10  -4   11.50    3.90
  10 -10   4    6.00    3.80
 -10 -10  -4    3.80    3.80
  10  10   4   -4.50    3.30
 -10  10  -4   -3.10    3.70
 -11  11   4    3.50    4.90
 -10 -11   4   25.70    5.40
  10 -11  -4   17.20    4.40
 -10  11   4   20.60    4.90
  10  11  -4   17.90    4.80
   9 -11  -4   29.50    4.60
  -9 -11   4   26.20    5.10
  -9  11   4   23.00    4.80
   9  11  -4   23.30    4.50
   8 -11  -4    1.20    2.30
  -8 -11   4    2.10    2.90
  -8  11   4   -0.20    2.50
  -7 -11   4   25.80    4.20
   7 -11  -4   23.10    3.80
  -7  11   4   27.20    4.20
   7  11  -4   26.30    4.00
  -6 -11   4   14.80    3.00
   6 -11  -4   10.20    2.40
  -6  11   4   12.90    2.70
   6  11  -4   10.20    2.60
  -5 -11   4   72.79    6.80
   5 -11  -4   52.29    6.50
   5  11  -4   43.40    6.60
  -5  11   4   72.09    7.00
  -4 -11   4    7.00    1.80
   4 -11  -4    4.60    1.40
  -4  11   4    4.20    1.80
   4  11  -4    5.00    1.60
  -3 -11   4    9.10    1.80
   3 -11  -4    6.50    1.50
  -3  11   4    6.40    1.80
   3  11  -4   10.50    2.00
  -2 -11   4    0.30    1.00
  -2 -11   4   -0.50    0.50
   2 -11  -4    0.80    1.10
  -2  11   4   -0.50    1.40
   2  11  -4    0.80    1.30
  -1 -11   4   40.10    4.50
  -1 -11   4   42.50    4.50
  -1 -11   4   45.10    4.90
   1 -11  -4   42.60    4.90
  -1  11   4   42.50    4.30
   1  11  -4   48.10    5.10
  -1  11   4   52.59    5.30
   0 -11  -4   13.60    1.70
   0 -11  -4   12.70    2.10
   0 -11   4   15.90    2.20
   0 -11   4   13.70    1.90
   0  11  -4   10.60    2.10
   0  11   4   12.60    1.90
   0  11   4   13.90    2.40
   0  11  -4   13.20    2.00
  -1 -11  -4   75.49    9.00
   1 -11   4   95.89    9.00
  -1  11  -4   77.09    8.90
  -1  11  -4   95.19    9.20
   1  11   4  106.49    9.40
   1  11   4   80.39    9.10
   2 -11   4   18.20    2.70
  -2 -11  -4   16.20    2.70
  -2 -11  -4   19.80    2.90
   2 -11   4   17.70    2.60
   2  11   4   26.30    3.30
  -2  11  -4   26.60    3.10
   2  11   4   23.80    3.20
   3 -11   4   50.39    5.80
  -3 -11  -4   61.29    5.80
   3  11   4   40.00    5.90
  -3  11  -4   58.39    5.90
   4 -11   4   47.00    6.60
  -4 -11  -4   64.89    6.60
  -4  11  -4   74.69    7.00
  -4  11  -4   63.89    6.70
   4  11   4   65.69    6.50
   4  11   4   47.10    6.60
  -5 -11  -4   19.00    3.00
   5 -11   4   15.20    3.00
  -5  11  -4   17.10    3.10
  -5  11  -4   21.10    3.00
   5  11   4   19.20    3.00
   5  11   4   22.00    3.00
  -6 -11  -4   44.10    5.60
   6 -11   4   33.10    5.20
  -6  11  -4   50.19    5.40
   6  11   4   42.10    5.00
   6  11   4   31.80    5.20
  -6  11  -4   44.20    5.70
  -7 -11  -4   72.59    7.80
   7 -11   4   57.89    7.50
   7  11   4   69.99    7.30
  -7  11  -4   51.89    7.60
  -7  11  -4   52.69    7.30
   7  11   4   72.49    7.40
  -8 -11  -4   25.30    4.30
   8 -11   4   23.90    4.20
  -8  11  -4   27.10    4.50
   8  11   4   21.70    3.80
   9 -11   4   33.50    5.30
  -9 -11  -4   29.00    5.20
   9  11   4   23.00    4.50
  -9  11  -4   27.60    5.00
  10 -11   4   60.59    8.10
 -10 -11  -4   43.80    6.80
 -10  11  -4   40.20    6.70
  10  11   4   31.80    6.10
  10 -12  -4   21.00    4.60
 -10 -12   4   13.00    5.30
 -10  12   4   25.60    5.30
  10  12  -4   18.90    4.90
  -9 -12   4  117.89   13.30
   9 -12  -4  112.79   12.70
  -9  12   4  118.09   13.10
   9  12  -4  110.89   13.00
  -8 -12   4   25.40    4.50
   8 -12  -4   24.00    4.30
   8  12  -4   27.10    4.40
  -8  12   4   20.90    4.20
  -7 -12   4  239.98   23.30
   7 -12  -4  223.38   23.10
   7  12  -4  207.68   23.30
  -7  12   4  247.48   23.50
  -6 -12   4   43.60    5.30
  -6  12   4   37.80    5.40
   6  12  -4   30.10    4.90
   5 -12  -4  557.14   53.59
   5  12  -4  524.55   53.59
  -5  12   4  559.44   53.69
   4 -12  -4   62.19    7.10
  -4 -12   4   68.69    7.20
   4  12  -4   53.09    7.10
  -4  12   4   78.19    7.60
  -3 -12   4  423.96   41.60
  -3  12   4  434.56   41.90
   3  12  -4  417.36   41.80
   2 -12  -4   23.20    3.00
  -2 -12   4   17.30    2.30
  -2 -12   4   19.70    2.30
  -2 -12   4   27.10    3.10
   2  12  -4   18.00    3.00
  -2  12   4   24.20    3.50
  -1 -12   4  573.04   55.49
  -1 -12   4  660.23   55.89
   1 -12  -4  573.14   55.79
  -1 -12   4  563.54   55.49
   1  12  -4  509.95   55.89
  -1  12   4  623.24   56.09
  -1  12   4  515.45   55.39
   0 -12  -4   24.30    3.60
   0 -12   4   37.10    3.70
   0 -12  -4   24.20    3.10
   0 -12   4   28.30    3.40
   0  12   4   33.90    3.60
   0  12  -4   30.70    3.50
   0  12  -4   29.10    3.90
   0  12   4   35.30    4.10
  -1 -12  -4  470.35   48.30
   1 -12   4  522.45   48.20
   1  12   4  528.55   48.50
  -1  12  -4  579.04   48.50
  -1  12  -4  443.36   48.10
   1  12   4  430.06   48.10
  -2 -12  -4   27.10    3.70
   2 -12   4   27.70    3.40
   2 -12   4   27.70    3.50
  -2 -12  -4   29.20    3.50
   2  12   4   25.90    3.80
  -2  12  -4   26.50    3.80
  -3 -12  -4  512.45   53.19
   3 -12   4  556.24   53.39
   3  12   4  574.44   53.49
   4 -12   4   25.80    4.50
  -4 -12  -4   44.40    4.60
  -4  12  -4   38.90    4.70
   4  12   4   33.00    4.70
  -4  12  -4   35.30    4.80
   5 -12   4  152.18   16.70
  -5 -12  -4  197.88   16.90
   5  12   4  191.88   16.70
  -5  12  -4  150.08   16.70
  -5  12  -4  137.99   16.80
   5  12   4  159.98   16.70
  -6 -12  -4   14.00    2.90
   6 -12   4   10.70    2.80
   6  12   4   12.70    2.50
  -6  12  -4   12.40    3.10
   6  12   4   10.40    2.70
  -6  12  -4   13.10    2.70
  -7 -12  -4  134.69   12.30
   7 -12   4  112.29   12.10
   7  12   4  108.09   11.80
  -7  12  -4  109.49   11.90
  -7  12  -4  101.79   12.10
   7  12   4  101.99   11.70
  -8 -12  -4   27.10    4.80
   8 -12   4   23.20    4.50
   8  12   4   28.80    4.30
  -9 -12  -4   56.29    8.10
   9 -12   4   77.09    8.60
  -9  12  -4   42.80    7.30
   9  12   4   50.59    7.70
  10 -12   4   13.10    4.70
 -10 -12  -4    2.20    4.60
  10  12   4    8.70    4.40
  10 -13  -4   -2.40    3.70
  10  13  -4   -0.90    4.40
 -10  13   4   -0.40    4.60
  -9 -13   4    5.50    3.80
   9 -13  -4   11.10    3.30
  -9  13   4    0.70    3.60
   9  13  -4    4.50    3.60
  -8 -13   4    5.00    3.20
   8 -13  -4    5.20    2.80
   8  13  -4    6.40    3.10
  -8  13   4    8.50    3.10
  -7 -13   4    2.60    2.70
   7 -13  -4    4.30    2.30
  -7  13   4    3.40    2.90
   7  13  -4    0.90    2.50
  -6 -13   4    1.60    2.30
   6 -13  -4    1.90    1.70
   6  13  -4    2.40    2.00
  -5 -13   4    6.20    2.00
   5 -13  -4    2.80    1.80
  -5  13   4    3.90    2.20
   5  13  -4    5.70    2.30
  -4 -13   4   34.90    4.40
   4 -13  -4   28.40    4.30
  -4  13   4   35.90    4.90
   4  13  -4   35.20    4.70
  -3 -13   4   27.90    3.80
   3 -13  -4   21.40    3.40
  -3  13   4   27.30    3.90
   3  13  -4   28.70    4.00
  -2 -13   4    2.40    0.90
  -2 -13   4    2.70    0.90
  -2 -13   4    2.40    1.50
   2 -13  -4    0.80    1.20
  -2  13   4    3.60    2.10
   2  13  -4    2.50    1.80
  -1 -13   4   86.49    8.60
  -1 -13   4   87.49    8.70
  -1 -13   4   99.39    9.00
   1 -13  -4   71.59    8.80
   1  13  -4   97.59    9.20
  -1  13   4   70.09    9.10
   0 -13  -4   11.40    1.50
   0 -13   4   11.90    2.00
   0 -13  -4    7.30    1.90
   0  13   4   10.90    1.80
   0  13  -4   10.00    2.20
   0  13  -4    9.20    1.80
   0  13   4    8.30    2.20
   1 -13   4  251.77   23.10
  -1 -13  -4  216.08   23.20
   1 -13   4  221.68   23.00
   1  13   4  214.28   23.40
  -1  13  -4  268.67   23.40
  -2 -13  -4   24.20    3.10
  -2 -13  -4   18.50    3.00
   2 -13   4   24.20    2.90
   2 -13   4   18.40    2.80
   2  13   4   16.40    3.10
  -2  13  -4   21.10    3.10
   3 -13   4  101.99   11.70
  -3 -13  -4  111.09   11.80
  -3 -13  -4  137.59   11.80
  -3  13  -4  108.69   11.80
   3  13   4  111.59   11.90
   4 -13   4    3.20    1.70
  -4 -13  -4   -0.10    1.60
  -4  13  -4    1.30    2.00
   4  13   4    0.70    1.90
  -4  13  -4    1.80    1.70
   5 -13   4  101.89   12.40
  -5 -13  -4  140.29   12.40
  -5  13  -4  104.39   12.40
  -5  13  -4  125.79   12.50
   5  13   4  105.59   12.40
   5  13   4  127.79   12.20
  -6 -13  -4    1.30    2.10
  -6  13  -4    7.40    2.70
   6  13   4    0.80    2.40
  -6  13  -4    1.40    2.50
   6  13   4    4.50    1.90
  -7 -13  -4  142.39   13.70
   7 -13   4  109.29   13.50
   7  13   4  147.69   13.60
  -7  13  -4  105.09   13.60
  -7  13  -4  128.19   13.50
   8 -13   4    0.90    2.90
  -8 -13  -4   -0.70    3.20
   8  13   4    0.60    2.40
  -8  13  -4   -1.90    3.20
  -9 -13  -4   84.39   12.00
   9  13   4   98.99   11.60
  -9  13  -4  117.59   12.40
  10  13   4   11.40    4.50
  10  14  -4   24.90    6.00
 -10  14   4   20.30    6.10
   9 -14  -4  169.38   18.10
  -9 -14   4  173.38   18.60
   9  14  -4  170.88   18.50
   8 -14  -4   18.40    4.10
  -8 -14   4   30.50    4.80
  -8  14   4   21.90    4.70
   8  14  -4   21.60    4.60
  -7 -14   4  116.79   13.70
   7 -14  -4  126.89   13.60
  -7  14   4  152.48   14.00
   7  14  -4  113.99   13.60
  -6 -14   4   30.80    4.60
   6 -14  -4   25.90    4.40
   6  14  -4   30.20    4.60
  -6  14   4   43.00    5.70
   5 -14  -4  235.58   23.40
   5  14  -4  229.58   23.50
   4 -14  -4    4.30    2.00
  -4 -14   4    8.20    2.20
  -4  14   4    5.40    2.30
   4  14  -4    7.00    2.20
  -3 -14   4  227.68   21.90
  -3 -14   4  221.98   22.50
  -3  14   4  264.77   23.00
   3  14  -4  193.08   22.70
   2 -14  -4    9.50    2.00
  -2 -14   4   10.60    2.20
  -2 -14   4   12.00    1.60
  -2  14   4    9.20    2.60
   2  14  -4   10.00    2.50
   1 -14  -4  249.08   27.90
  -1 -14   4  301.87   27.60
   1 -14  -4  251.17   27.30
  -1 -14   4  318.47   27.90
   1  14  -4  278.37   28.10
  -1  14   4  303.27   28.30
   0 -14  -4   82.99    9.90
   0 -14   4  105.39    9.60
   0 -14   4  108.29    9.90
   0 -14  -4   94.79    9.40
   0  14   4   87.19   10.20
   0  14   4   87.19    9.70
  -1 -14  -4  261.77   28.00
   1 -14   4  286.27   27.80
   1 -14   4  332.77   27.90
   1  14   4  248.68   28.10
  -1  14  -4  284.07   28.10
  -2 -14  -4   31.60    3.70
  -2 -14  -4   25.30    3.90
   2 -14   4   21.50    3.40
   2 -14   4   25.70    3.50
  -2  14  -4   35.50    4.20
   2  14   4   26.20    4.10
  -3 -14  -4  419.06   46.10
  -3 -14  -4  498.55   46.00
  -3  14  -4  493.85   46.20
   3  14   4  470.35   46.30
  -4 -14  -4   30.90    4.70
  -4 -14  -4   28.70    4.50
   4 -14   4   40.70    4.70
  -4  14  -4   28.00    4.50
  -4  14  -4   38.60    4.80
   4  14   4   37.20    5.10
   5 -14   4  161.68   18.70
  -5 -14  -4  215.98   18.80
   5  14   4  177.68   18.80
  -5  14  -4  195.28   18.80
  -5  14  -4  170.28   18.80
   6 -14   4   64.99    8.20
  -6 -14  -4   76.29    8.20
  -6  14  -4   63.19    8.30
  -6  14  -4   67.69    8.40
   6  14   4   70.69    8.30
  -7 -14  -4  102.59   11.60
   7 -14   4  113.99   11.80
  -7  14  -4  110.89   11.70
   7  14   4   93.19   11.20
  -7  14  -4  103.59   11.80
  -8 -14  -4   45.50    7.00
   8 -14   4   64.49    8.00
   8  14   4   52.79    7.20
  -8  14  -4   52.49    7.10
  -9 -14  -4   95.69   12.10
   9 -14   4  110.49   12.20
   9  14   4   88.19   11.50
   9 -15  -4   17.30    4.10
  -9 -15   4   15.10    5.00
   9  15  -4   12.30    4.90
  -9  15   4   14.20    4.60
  -8 -15   4   42.60    6.10
   8 -15  -4   30.60    5.30
   8  15  -4   37.80    5.90
  -8  15   4   31.70    5.90
  -7 -15   4    9.30    3.00
   7 -15  -4   10.10    3.00
  -7  15   4    4.50    3.30
   7  15  -4    4.30    3.30
   6 -15  -4   12.40    2.90
  -6 -15   4   11.50    3.20
  -6  15   4   19.40    3.70
   6  15  -4   16.20    3.50
  -5 -15   4   15.10    3.10
   5 -15  -4   10.60    2.70
   5  15  -4   11.60    3.10
  -5  15   4   10.50    3.50
  -4 -15   4   43.50    5.50
  -4  15   4   39.40    5.90
   3 -15  -4    1.00    1.50
  -3 -15   4    2.40    1.90
  -3  15   4    0.20    1.90
   3  15  -4   -1.90    2.00
   2 -15  -4   36.40    4.70
  -2 -15   4   40.40    4.20
  -2  15   4   33.60    5.40
   2  15  -4   36.60    5.10
   1 -15  -4   20.50    2.30
  -1 -15   4   28.70    3.40
   1 -15  -4   21.80    3.30
  -1  15   4   20.10    3.60
   0 -15  -4   61.89    7.10
   0 -15   4   72.29    7.30
   0 -15  -4   65.19    7.60
   0  15   4   68.69    8.10
   0  15  -4   89.19    8.20
   1 -15   4   14.10    2.20
  -1 -15  -4    9.80    2.60
  -1 -15  -4   17.50    2.30
   1 -15   4   14.50    2.30
  -1  15  -4   18.20    3.10
   1  15   4   11.20    3.00
  -2 -15  -4    7.20    2.00
   2 -15   4    6.10    1.70
  -2 -15  -4    9.70    2.00
   2 -15   4    6.50    1.90
   2  15   4    6.50    2.40
  -2  15  -4    7.30    2.20
   3 -15   4   35.60    4.80
  -3 -15  -4   34.20    5.00
   3  15   4   38.90    5.40
  -4 -15  -4   60.99    6.20
  -4 -15  -4   46.80    6.30
   4 -15   4   48.20    6.20
   4  15   4   42.10    6.50
  -4  15  -4   44.20    6.60
  -4  15  -4   55.49    6.40
   5 -15   4   39.50    5.80
  -5 -15  -4   41.00    5.70
  -5 -15  -4   38.50    5.70
  -5  15  -4   43.20    6.10
   5  15   4   42.50    6.10
  -5  15  -4   41.90    5.90
   6 -15   4   60.29    8.00
  -6 -15  -4   69.19    8.00
  -6  15  -4   57.59    8.10
   6  15   4   62.99    8.10
  -6  15  -4   65.59    8.30
   7 -15   4   20.50    4.10
  -7 -15  -4   22.40    4.20
  -7  15  -4   17.80    4.30
   8 -15   4   30.20    5.00
  -8 -15  -4   20.20    4.80
   8  15   4   20.30    4.20
   9 -15   4   14.60    4.90
  -9 -15  -4    7.80    4.70
   9  15   4   17.20    4.30
   9  16  -4   19.40    5.60
  -9  16   4   18.10    5.50
   8 -16  -4  213.98   22.20
  -8 -16   4  210.88   22.40
   8  16  -4  213.28   22.40
  -7 -16   4   20.60    4.70
   7 -16  -4   27.90    4.40
  -7  16   4   21.10    4.70
   7  16  -4   31.80    5.20
  -6 -16   4  142.99   15.40
   6 -16  -4  143.79   15.30
   6  16  -4  144.39   15.60
  -6  16   4  149.49   15.80
   5 -16  -4   42.00    5.80
  -5 -16   4   40.20    5.90
   5  16  -4   47.10    6.20
  -5  16   4   39.80    6.10
  -4 -16   4  249.18   22.50
   4 -16  -4  209.08   22.40
   4  16  -4  217.68   22.70
  -4  16   4  213.98   22.80
  -3 -16   4   46.00    5.90
  -3  16   4   54.69    6.50
   3  16  -4   44.30    6.20
  -2 -16   4  348.57   32.20
   2 -16  -4  302.67   32.10
  -1 -16   4   26.60    3.70
   1 -16  -4   26.10    4.10
  -1 -16   4   31.80    4.00
   1  16  -4   32.50    4.40
  -1  16   4   26.10    4.40
   0 -16   4  260.57   28.30
   0 -16   4  337.67   28.60
   0 -16  -4  248.28   28.50
   0 -16  -4  275.47   28.20
   0  16   4  338.47   29.10
   0  16  -4  285.37   28.80
   1 -16   4   44.90    4.80
   1 -16   4   35.50    4.60
  -1 -16  -4   39.20    4.60
  -1 -16  -4   32.10    5.00
  -1  16  -4   34.90    5.20
   1  16   4   40.20    5.60
   2 -16   4  189.38   19.40
  -2 -16  -4  213.18   19.40
  -2 -16  -4  194.88   19.60
  -2  16  -4  182.08   19.80
   2  16   4  187.88   19.90
   3 -16   4   30.90    5.00
  -3 -16  -4   34.80    5.10
  -3 -16  -4   42.00    5.10
   3  16   4   39.00    5.90
  -3  16  -4   41.80    5.60
   4 -16   4  158.68   16.90
  -4 -16  -4  159.18   16.80
  -4 -16  -4  158.68   16.90
  -4  16  -4  200.38   17.40
  -4  16  -4  160.88   17.10
   4  16   4  155.18   17.20
  -5 -16  -4   15.20    3.40
  -5 -16  -4   13.40    3.10
   5 -16   4    9.90    3.10
   5  16   4   15.70    3.70
  -5  16  -4   15.00    3.40
  -6 -16  -4   86.89   10.10
   6 -16   4   88.29   10.30
  -6 -16  -4   76.69   10.10
   6  16   4   96.49   10.50
  -6  16  -4   84.99   10.30
   7 -16   4   31.10    4.90
  -7 -16  -4   23.30    4.70
  -7  16  -4   18.50    4.60
  -8 -16  -4   75.09   12.00
   8 -16   4  122.19   12.20
   8 -17  -4    6.90    3.80
  -8 -17   4   -1.30    4.00
   8  17  -4   -3.10    4.30
  -8  17   4    2.20    4.30
  -7 -17   4    7.50    3.70
   7 -17  -4   12.40    3.50
   7  17  -4    8.50    4.00
  -7  17   4    5.00    3.80
  -6 -17   4   20.20    3.90
   6 -17  -4   18.60    3.80
   6  17  -4    7.00    3.90
  -6  17   4   16.80    4.40
  -5 -17   4    1.50    2.70
   5 -17  -4   -0.10    2.50
  -5  17   4   -5.20    2.80
   5  17  -4   -0.70    2.60
   4 -17  -4    1.10    2.10
  -4 -17   4    1.90    2.50
   4  17  -4    2.30    2.80
  -4  17   4   -1.50    2.70
   3 -17  -4    2.00    2.00
   3  17  -4   -3.00    2.30
  -3  17   4    2.30    2.60
   2 -17  -4   23.20    3.60
  -2 -17   4   29.00    3.80
   2  17  -4   21.50    4.00
  -2  17   4   21.80    4.40
   1 -17  -4    2.40    2.00
  -1 -17   4    5.70    1.60
  -1 -17   4    5.40    1.90
  -1  17   4    1.30    2.60
   1  17  -4    2.60    2.30
   0 -17   4   42.90    4.90
   0 -17   4   43.10    5.20
   0 -17  -4   33.20    5.20
   0  17   4   30.80    5.40
   0  17  -4   54.59    5.80
   1 -17   4   -0.30    1.50
   1 -17   4    1.70    1.80
  -1 -17  -4    0.40    1.90
  -1 -17  -4    3.20    1.80
  -1  17  -4    4.20    2.40
   2 -17   4   26.20    3.70
   2 -17   4   23.40    3.50
  -2 -17  -4   14.90    3.40
  -2 -17  -4   23.60    3.30
  -2  17  -4   28.20    4.20
  -3 -17  -4   29.40    3.70
  -3 -17  -4   25.30    3.80
   3 -17   4   19.10    3.50
  -3  17  -4   20.10    3.90
  -4 -17  -4   93.29   10.60
   4 -17   4   88.09   10.60
  -4  17  -4  115.99   11.00
   4  17   4   89.79   11.20
  -4  17  -4   95.19   11.00
  -5 -17  -4    6.40    2.90
   5 -17   4    0.20    2.70
  -5 -17  -4    1.50    2.80
   5  17   4    3.70    3.30
  -5  17  -4    5.30    3.30
  -5  17  -4    0.60    3.10
  -6 -17  -4   70.99    8.60
   6 -17   4   66.09    8.50
  -6 -17  -4   59.19    8.10
  -6  17  -4   54.29    8.60
   6  17   4   55.79    8.80
   7 -17   4    6.40    3.60
  -7 -17  -4   -2.30    3.50
  -7 -17  -4   -0.50    3.70
  -7  17  -4    0.50    3.80
   8 -17   4   90.19   11.60
  -7 -18   4   27.40    5.40
   7 -18  -4   25.40    4.80
   7  18  -4   31.10    5.70
  -7  18   4   23.20    5.40
   6 -18  -4  207.98   18.90
  -6 -18   4  141.79   18.70
  -6  18   4  152.28   19.20
   6  18  -4  220.98   19.40
   5 -18  -4   25.80    4.50
  -5 -18   4   29.40    4.70
  -5  18   4   28.00    5.50
   5  18  -4   34.10    5.20
   4 -18  -4  151.68   16.80
  -4 -18   4  167.58   16.90
  -4  18   4  175.38   17.50
   4  18  -4  154.48   17.20
   3 -18  -4    9.60    2.70
  -3 -18   4   15.70    3.00
  -3  18   4    6.90    3.20
   3  18  -4   13.30    3.50
   2 -18  -4  195.38   20.60
   2  18  -4  202.28   20.90
  -2  18   4  214.58   21.30
  -1 -18   4   34.50    4.80
   1 -18  -4   27.20    4.20
  -1  18   4   34.80    5.40
   1  18  -4   29.70    4.80
   0 -18  -4  134.09   15.10
   0 -18   4  137.69   14.90
   0 -18   4  161.78   14.80
   0  18   4  148.39   15.70
   0  18  -4  146.89   15.60
   1 -18   4   44.90    5.60
   1 -18   4   42.90    5.40
  -1  18  -4   40.70    6.10
   1  18   4   49.20    6.90
   2 -18   4  239.68   24.70
   2 -18   4  235.08   24.50
  -2  18  -4  283.07   25.20
   2  18   4  234.98   25.20
  -3 -18  -4   34.80    5.10
   3 -18   4   31.20    5.00
  -3 -18  -4   43.10    5.50
  -3  18  -4   52.59    6.40
   3  18   4   31.10    5.50
  -4 -18  -4   57.09    7.50
   4 -18   4   69.79    7.70
  -4 -18  -4   55.59    7.40
   4  18   4   56.79    8.30
  -4  18  -4   55.59    8.00
  -4  18  -4   53.39    8.10
  -5 -18  -4    3.10    3.40
  -5 -18  -4   -1.10    3.10
   5 -18   4    3.40    3.20
   5  18   4    3.30    3.70
  -5  18  -4    6.30    3.50
   6 -18   4   85.09    9.40
  -6 -18  -4   61.19    9.10
  -6 -18  -4   65.39    9.20
  -6  18  -4   58.29    8.60
   6  18   4   77.99   10.20
   7 -18   4   18.70    4.50
  -7 -18  -4    8.40    4.60
  -7  18  -4    9.40    4.60
  -7 -19   4   19.90    5.30
   7  19  -4   19.40    5.40
  -7  19   4   21.90    5.70
  -6 -19   4    2.00    3.60
   6 -19  -4    1.30    3.50
  -6  19   4    2.70    4.10
   6  19  -4   -0.80    4.10
  -5 -19   4   19.20    3.90
   5 -19  -4   16.70    3.90
   5  19  -4   18.30    4.40
  -5  19   4    3.00    4.20
  -4 -19   4    5.20    3.00
   4 -19  -4   11.30    3.00
  -4  19   4    5.00    3.80
   4  19  -4   15.00    3.90
   3 -19  -4   26.00    4.40
  -3 -19   4   25.60    4.20
   3  19  -4   27.90    4.80
  -3  19   4   31.30    5.40
   2 -19  -4    3.40    2.50
  -2 -19   4    7.60    2.60
   2  19  -4   11.50    3.40
  -2  19   4   10.20    3.60
   1 -19  -4   49.30    6.50
   1  19  -4   55.79    7.20
  -1  19   4   48.20    7.00
   0 -19  -4    3.50    2.30
   0 -19   4    3.10    2.20
   0  19   4    4.20    3.30
   0  19  -4   -0.90    2.70
   1 -19   4    4.90    2.10
  -1 -19  -4    7.10    2.60
  -1  19  -4    3.10    2.90
   1  19   4    4.10    3.10
   2 -19   4    9.50    2.50
  -2 -19  -4    0.40    2.40
   2 -19   4    2.50    2.60
   2  19   4    1.10    3.10
  -2  19  -4    5.60    3.00
  -3 -19  -4   10.50    3.40
  -3 -19  -4    5.00    3.00
   3 -19   4    7.10    3.00
   3  19   4    9.40    3.80
  -3  19  -4   14.00    3.50
  -4 -19  -4    8.50    3.30
   4 -19   4   12.20    3.50
  -4  19  -4   12.90    4.00
   4  19   4   14.10    4.40
  -5 -19  -4    4.20    3.30
  -5 -19  -4    6.90    3.50
   5 -19   4   -2.10    3.40
   5  19   4    0.60    4.10
  -5  19  -4    3.40    3.80
  -6 -19  -4   -0.90    3.90
   6 -19   4    9.40    4.10
  -6  19  -4    2.90    4.60
   6  19   4    6.40    4.90
   6 -20  -4   18.80    5.20
  -6 -20   4   27.20    5.20
   6  20  -4   19.10    5.40
  -6  20   4   18.90    5.90
   5 -20  -4  140.69   16.00
  -5  20   4  146.39   17.00
   5  20  -4  157.88   16.60
  -4 -20   4   11.60    3.40
   4 -20  -4    6.70    3.30
  -4  20   4    1.30    4.20
   4  20  -4   15.80    4.20
  -3 -20   4   97.29   10.30
   3 -20  -4   88.79   10.20
   3  20  -4   88.39   10.70
  -3  20   4   73.89   10.90
  -2 -20   4   29.50    4.90
   2 -20  -4   35.90    5.10
   2  20  -4   35.10    5.60
  -2  20   4   35.00    6.00
  -1 -20   4  144.39   14.60
   1 -20  -4  119.29   14.40
   1  20  -4  146.29   15.20
  -1  20   4  143.89   15.60
   0 -20   4   38.30    5.70
   0 -20  -4   38.60    5.80
   0  20   4   38.30    5.90
   0  20  -4   37.70    5.90
  -1 -20  -4  204.88   20.90
  -1  20  -4  192.08   21.40
   1  20   4  216.88   21.60
  -2 -20  -4   28.60    4.70
   2 -20   4   40.40    5.20
  -2  20  -4   30.80    5.40
   2  20   4   27.30    5.50
  -3 -20  -4  148.89   16.20
   3 -20   4  159.48   16.30
   3  20   4  166.28   17.10
  -3  20  -4  139.89   16.60
  -4 -20  -4   10.30    3.80
   4 -20   4    6.70    3.70
   4  20   4   11.50    4.70
  -4  20  -4    9.90    4.10
  -5 -20  -4   57.49    8.30
   5 -20   4   61.59    8.80
   5  20   4   61.69    8.40
  -5  20  -4   40.80    7.50
  -6 -20  -4    6.50    4.90
   6 -20   4    2.50    4.50
  -6  20  -4    2.80    5.00
  -5 -21   4    4.40    3.80
   5 -21  -4   10.50    4.10
  -4 -21   4   -0.40    3.70
   4 -21  -4    7.60    3.70
   4  21  -4    9.40    4.50
  -4  21   4    4.80    4.40
   3 -21  -4    3.70    3.30
  -3 -21   4    3.40    3.40
  -3  21   4    3.10    4.20
   3  21  -4    4.90    4.00
  -2 -21   4    6.30    3.30
   2 -21  -4    0.80    3.20
   2  21  -4   -5.40    3.50
  -2  21   4   -3.40    4.00
   1 -21  -4   28.80    4.70
  -1 -21   4   32.10    4.90
   1  21  -4   28.20    5.40
  -1  21   4   36.50    6.30
   0 -21   4   10.00    3.20
   0 -21  -4    7.20    3.00
   0  21  -4    3.90    3.80
   0  21   4    3.20    4.40
   1 -21   4   10.10    3.10
  -1 -21  -4    5.00    3.20
  -1  21  -4   12.90    4.10
   1  21   4    8.40    4.60
  -2 -21  -4    1.80    3.10
  -2  21  -4    0.50    3.80
   2  21   4   -0.40    4.10
  -3 -21  -4   56.59    7.20
  -3  21  -4   34.50    6.50
   3  21   4   52.89    7.70
  -4 -21  -4   -3.90    3.50
   4  21   4    4.20    4.90
  -4  21  -4    0.40    4.30
   5 -21   4   27.70    5.90
  -5  21  -4   25.60    6.10
   5  21   4   30.80    6.80
  -4 -22   4    5.20    4.20
   4 -22  -4    3.20    4.30
  -3 -22   4   91.99   11.30
  -2 -22   4    1.70    3.80
   2 -22  -4   -2.00    3.50
   2  22  -4    7.40    4.20
  -2  22   4   -6.00    4.70
  -1 -22   4   97.79   12.90
   1 -22  -4  119.79   13.20
  -1  22   4  122.79   14.60
   1  22  -4  130.09   14.10
   0 -22  -4    2.50    3.40
   0  22  -4    0.90    4.10
   0  22   4    1.80    4.70
  -1 -22  -4   30.10    5.10
  -1  22  -4   24.40    6.00
   1  22   4   33.40    6.40
  -2 -22  -4    9.90    4.00
  -2  22  -4    6.40    4.40
   2  22   4   13.60    5.30
  -3 -22  -4   61.99    8.80
   3  22   4   73.59   10.70
  -3  22  -4   51.09    8.50
   1 -23  -4    0.20    4.10
   0 -23  -4   17.50    4.60
  -1 -23  -4   14.20    4.50
  12   0  -5    6.20    4.30
 -12   0   5   -4.30    4.50
  11   0  -5   65.29    9.10
  11   0  -5   71.39    8.90
  10   0  -5   -1.30    2.30
  10   0  -5    1.00    2.70
   9   0  -5  109.29   12.20
  -9   0   5  116.19   12.10
   8   0  -5    0.30    1.50
   8   0  -5    0.90    1.80
  -8   0   5    1.30    1.80
  -7   0   5   73.19    7.40
   7   0  -5   62.29    7.10
   6   0  -5    0.60    0.90
  -6   0   5    1.10    1.30
   5   0  -5  103.59   10.80
   5   0  -5  111.19   10.70
  -5   0   5  103.79   10.70
  -4   0   5   -0.60    0.80
  -4   0   5    1.30    0.80
   4   0  -5   -0.10    0.70
   4   0  -5    0.40    0.90
   3   0  -5  406.66   38.50
  -3   0   5  417.16   38.80
   3   0  -5  430.16   38.70
  -3   0   5  406.16   38.60
  -3   0   5  327.87   38.50
   2   0  -5    0.00    0.60
   2   0  -5    0.20    0.60
  -2   0   5   -0.20    0.50
   2   0  -5    0.60    0.70
   2   0  -5    0.40    0.40
  -1   0   5   63.89    6.70
   1   0  -5   58.39    6.70
  -1   0   5   82.99    6.90
   0   0   5    0.10    0.40
   0   0  -5    0.60    0.50
   0   0  -5    0.10    0.50
   0   0   5    0.10    0.50
   0   0   5   -0.60    0.40
   0   0  -5   -0.10    0.50
  -1   0  -5    1.00    0.60
  -1   0  -5    1.40    0.60
  -1   0  -5    0.40    0.50
   1   0   5    1.90    0.60
  -2   0  -5    0.00    0.70
  -2   0  -5    0.50    0.60
  -2   0  -5    0.00    0.40
  -2   0  -5    0.20    0.40
  -3   0  -5  102.19    9.30
   3   0   5   87.59    9.70
  -3   0  -5  105.29    9.70
  -3   0  -5   84.69    9.80
   4   0   5    0.50    0.90
  -4   0  -5    0.10    1.00
   5   0   5  191.48   18.60
  -5   0  -5  180.88   18.70
  -6   0  -5   -0.90    1.40
   6   0   5   -1.00    1.10
   7   0   5   -1.60    1.30
  -7   0  -5   -0.50    1.80
   8   0   5    0.60    1.90
  -8   0  -5   -2.40    2.20
   9   0   5    3.80    2.40
  -9   0  -5    1.30    2.60
 -10   0  -5    1.90    3.30
  10   0   5    2.40    3.00
 -11   0  -5    3.00    4.00
  11   0   5    9.00    3.90
 -12  -1   5   13.40    4.70
  12  -1  -5   15.10    4.70
 -12   1   5   16.40    6.10
  11  -1  -5   48.10    7.30
  11  -1  -5   59.69    8.00
  11   1  -5   50.59    7.90
  11   1  -5   51.49    7.60
  10  -1  -5   -0.50    2.90
  10  -1  -5    3.10    2.60
 -10  -1   5    0.60    2.80
  10   1  -5    4.60    2.50
 -10   1   5    1.90    2.70
  10   1  -5   -4.30    2.70
  -9  -1   5   36.30    6.00
   9  -1  -5   47.80    6.20
   9  -1  -5   54.19    6.00
   9   1  -5   42.40    6.30
   9   1  -5   48.90    5.90
  -9   1   5   50.49    6.00
  -8  -1   5   48.70    5.50
   8  -1  -5   41.90    5.10
  -8   1   5   39.70    5.20
   8   1  -5   42.60    5.10
   8   1  -5   36.60    5.40
   7  -1  -5  635.64   59.89
  -7  -1   5  668.73   60.09
   7   1  -5  655.53   59.89
  -7   1   5  502.35   59.79
  -6  -1   5   67.19    6.30
   6  -1  -5   47.40    5.90
   6   1  -5   50.29    6.20
  -6   1   5   70.19    6.10
  -6   1   5   54.29    6.20
   6   1  -5   51.99    5.90
  -5  -1   5  763.82   80.19
   5  -1  -5  810.72   80.09
  -5   1   5  823.02   80.29
  -5   1   5  908.81   80.19
   4  -1  -5    1.50    0.80
  -4  -1   5    2.10    1.00
  -4  -1   5    2.20    0.90
  -4   1   5    0.00    0.90
  -4   1   5    2.30    0.90
   4   1  -5    0.50    0.70
   4   1  -5    2.30    0.90
  -4   1   5    0.60    0.90
   3  -1  -5 2080.79  191.28
  -3  -1   5 1662.23  190.98
   3  -1  -5 2021.60  191.08
   3   1  -5 2128.89  190.98
   3   1  -5 2212.18  191.28
  -3   1   5 1687.53  191.08
  -3   1   5 2111.39  191.28
  -3   1   5 1921.91  191.08
   2  -1  -5  130.19   13.00
   2  -1  -5  163.28   13.00
   2  -1  -5  120.99   13.10
   2   1  -5  128.09   12.90
   2   1  -5  128.79   13.00
   2   1  -5  121.39   13.10
  -1  -1   5 1712.73  144.99
   1  -1  -5 1362.96  144.99
   1  -1  -5 1620.84  144.89
   1  -1  -5 1390.66  144.89
   1   1  -5 1341.67  144.99
   1   1  -5 1340.97  144.89
  -1   1   5 1530.85  144.99
  -1   1   5 1695.73  144.89
   0  -1  -5 1148.59  114.79
   0  -1   5 1365.66  114.79
   0  -1  -5 1189.68  114.79
   0  -1  -5 1111.69  114.79
   0   1  -5 1147.89  114.79
   0   1  -5 1106.99  114.79
   0   1  -5 1371.86  114.79
   0   1   5 1053.59  114.79
   1  -1   5 2871.71  245.28
  -1  -1  -5 2490.35  245.28
  -1  -1  -5 2988.50  245.28
   1   1   5 2420.76  245.28
  -1   1  -5 2222.68  245.28
  -1   1  -5 2241.08  245.28
   2  -1   5  531.95   53.09
  -2  -1  -5  542.45   52.79
  -2   1  -5  556.54   53.09
   2   1   5  538.75   53.09
  -2   1  -5  559.74   52.79
  -3  -1  -5 1546.45  157.28
   3  -1   5 1641.64  157.18
  -3   1  -5 1570.74  157.18
  -3   1  -5 1662.23  156.88
   3   1   5 1625.54  157.28
  -3   1  -5 1701.53  156.88
  -4  -1  -5  242.58   23.10
   4  -1   5  243.58   23.00
  -4   1  -5  221.18   23.10
   4   1   5  224.88   23.00
   5  -1   5 1497.65  137.19
  -5  -1  -5 1409.16  137.29
  -5   1  -5 1376.06  137.29
   5   1   5 1378.66  137.19
   6  -1   5  366.46   34.70
  -6  -1  -5  320.37   34.80
  -6   1  -5  335.57   34.80
   6   1   5  386.06   34.80
  -7  -1  -5  281.17   29.60
   7   1   5  311.07   29.50
   8  -1   5  172.88   15.50
  -8  -1  -5  133.09   15.40
  -8   1  -5  117.89   15.30
   8   1   5  166.98   15.40
  -9  -1  -5  158.08   17.70
   9  -1   5  177.08   17.70
  -9   1  -5  165.88   17.70
   9   1   5  175.18   17.70
 -10  -1  -5   56.49    8.30
  10  -1   5   62.79    8.20
  10   1   5   66.79    8.40
 -10   1  -5   63.09    8.50
  11  -1   5  137.89   16.50
 -11  -1  -5  157.08   16.50
 -11   1  -5  151.28   16.60
 -12  -2   5   11.00    4.80
  12  -2  -5   12.40    4.50
  11  -2  -5   64.29   10.00
  11  -2  -5  102.39   10.60
  11   2  -5   81.69   10.60
  11   2  -5   91.79   10.40
 -10  -2   5   34.70    5.10
  10  -2  -5   36.20    5.20
  10   2  -5   31.90    4.60
 -10   2   5   28.90    4.70
  10   2  -5   26.60    4.80
  -9  -2   5   71.39    8.30
   9  -2  -5   76.79    8.00
  -9   2   5   69.59    8.00
   9   2  -5   69.89    7.80
   9   2  -5   59.99    8.10
  -8  -2   5  176.58   19.50
   8  -2  -5  225.28   19.50
  -8   2   5  177.28   19.30
   8   2  -5  174.28   19.60
   8   2  -5  211.28   19.30
  -7  -2   5   53.19    6.50
   7  -2  -5   63.79    6.40
   7   2  -5   47.70    6.50
  -7   2   5   57.69    6.60
  -7   2   5   52.59    6.40
   7   2  -5   67.19    6.30
  -6  -2   5   50.89    4.80
   6  -2  -5   46.20    4.60
  -6  -2   5   29.90    4.70
  -6   2   5   44.30    4.80
   6   2  -5   37.00    4.40
   6   2  -5   34.00    4.80
  -6   2   5   37.10    4.60
   5  -2  -5  209.18   19.60
  -5  -2   5  217.28   19.80
  -5  -2   5  177.08   19.50
   5   2  -5  183.38   19.80
   5   2  -5  202.58   19.50
  -5   2   5  205.58   19.80
   4  -2  -5  301.87   33.30
  -4  -2   5  385.76   33.50
  -4  -2   5  296.47   33.20
   4  -2  -5  296.77   33.30
   4   2  -5  355.26   33.40
   4   2  -5  374.16   33.30
   4   2  -5  369.06   33.60
  -4   2   5  356.26   33.30
  -4   2   5  351.16   33.60
   3  -2  -5  209.48   23.70
  -3  -2   5  252.07   23.70
  -3  -2   5  246.58   23.90
   3  -2  -5  266.47   24.10
   3   2  -5  243.98   24.00
  -3   2   5  225.28   24.00
  -3   2   5  261.67   23.80
   3   2  -5  236.18   23.70
   3   2  -5  260.17   24.10
   2  -2  -5  123.19   12.60
   2  -2  -5  110.29   12.70
   2  -2  -5  140.59   12.60
   2   2  -5  111.79   12.70
   2   2  -5  129.89   12.80
   2   2  -5  148.59   12.50
   1  -2  -5  174.18   16.10
  -1  -2   5  145.59   16.00
   1  -2  -5  147.99   16.10
   1  -2  -5  184.58   16.10
   1   2  -5  196.58   16.00
   1   2  -5  153.28   16.10
  -1   2   5  164.78   16.20
   1   2  -5  144.99   16.00
   1   2  -5  160.78   16.20
   0  -2  -5   14.40    2.00
   0  -2  -5   11.70    1.90
   0  -2   5   17.40    1.80
   0  -2   5   16.00    1.90
   0  -2  -5   18.60    1.90
   0   2  -5   14.20    1.90
   0   2  -5   18.10    1.80
   0   2  -5   14.50    1.90
   0   2   5   19.10    2.00
   0   2   5   13.60    1.90
   0   2  -5   11.90    1.90
   1  -2   5   88.79    8.70
  -1  -2  -5   80.89    8.60
  -1  -2  -5   86.59    8.70
  -1  -2  -5   88.19    8.60
   1  -2   5   95.79    8.60
  -1   2  -5   91.49    8.60
  -1   2  -5   73.09    8.60
   1   2   5   85.09    8.60
  -2  -2  -5    9.20    1.20
  -2   2  -5    6.10    1.20
   2   2   5   10.20    1.50
  -2   2  -5   10.00    1.20
  -2   2  -5    6.70    1.30
  -2   2  -5   10.40    1.60
   2   2   5    8.30    1.20
  -3  -2  -5   59.69    7.00
  -3  -2  -5   66.69    6.50
   3  -2   5   67.69    6.90
  -3   2  -5   64.09    7.00
   3   2   5   73.09    6.50
  -3   2  -5   67.79    6.60
   3   2   5   64.19    7.10
  -3   2  -5   64.09    6.80
   3   2   5   64.79    6.90
  -4  -2  -5   43.50    4.50
   4  -2   5   41.10    4.30
   4   2   5   36.80    4.20
  -4   2  -5   29.70    4.50
   5  -2   5   24.40    3.20
  -5  -2  -5   23.60    3.40
   5   2   5   19.10    3.10
  -5   2  -5   25.00    3.50
   6  -2   5   80.19    7.90
  -6  -2  -5   63.89    8.00
   6   2   5   73.29    7.90
  -6   2  -5   70.19    8.00
   7  -2   5   12.20    2.50
  -7  -2  -5    7.70    2.70
   7   2   5   22.50    3.10
  -7   2  -5   17.20    3.00
  -8  -2  -5   10.90    3.00
   8  -2   5   10.30    2.60
   8   2   5   17.30    3.10
  -8   2  -5   17.20    3.30
  -9  -2  -5    0.40    2.80
   9  -2   5   -0.30    2.10
   9   2   5    0.00    2.20
  -9   2  -5   -2.20    2.40
 -10  -2  -5   -0.80    2.80
  10  -2   5    3.40    3.20
  10   2   5    0.60    3.00
 -10   2  -5    0.30    3.40
 -11  -2  -5    9.80    4.30
  11  -2   5    0.80    3.90
  11   2   5    8.30    3.90
 -11   2  -5    5.80    4.40
  12  -3  -5   81.89   10.80
 -11  -3   5   11.20    4.30
  11  -3  -5   11.20    3.50
  11  -3  -5   13.60    4.00
 -11   3   5   11.90    4.80
  11   3  -5    8.90    3.90
  10  -3  -5  164.28   16.40
 -10  -3   5  152.88   16.50
 -10   3   5  143.89   16.20
  10   3  -5  168.18   16.40
   9  -3  -5   27.20    3.60
  -9  -3   5   20.30    3.50
   9   3  -5   13.10    3.30
   9   3  -5   18.00    3.20
  -9   3   5   21.80    3.40
   8  -3  -5  590.44   51.89
  -8  -3   5  451.45   51.89
   8   3  -5  611.14   51.69
  -8   3   5  484.95   51.69
  -8   3   5  586.74   51.99
   8   3  -5  453.55   51.89
   7  -3  -5   16.30    2.60
  -7  -3   5   13.70    2.60
  -7   3   5   21.40    2.90
  -7   3   5   14.80    2.70
   7   3  -5   16.40    2.50
   7   3  -5   14.60    2.80
   6  -3  -5  741.83   64.39
   6  -3  -5  678.83   64.39
  -6   3   5  692.23   64.59
   6   3  -5  536.05   64.49
  -5  -3   5  218.98   19.80
   5  -3  -5  172.48   19.70
  -5  -3   5  174.58   19.50
  -5   3   5  210.18   19.90
   5   3  -5  220.68   19.90
   5   3  -5  207.18   19.50
   4  -3  -5  797.72   77.19
   4  -3  -5  817.22   76.99
  -4  -3   5  812.42   77.29
  -4  -3   5  755.62   76.99
  -4   3   5  829.32   77.09
   4   3  -5  785.42   77.29
  -4   3   5  826.92   77.19
  -4   3   5  742.73   77.29
  -3  -3   5  240.08   23.40
   3  -3  -5  237.68   23.30
   3  -3  -5  242.68   23.20
   3  -3  -5  246.18   23.50
   3   3  -5  236.08   23.40
   3   3  -5  247.78   23.30
   3   3  -5  231.78   23.10
  -3   3   5  250.87   23.20
  -3   3   5  209.48   23.40
   2  -3  -5  710.93   79.39
   2  -3  -5  900.31   79.19
  -2   3   5  914.61   79.49
   2   3  -5  800.12   79.09
   2   3  -5  719.63   79.39
   2   3  -5  810.72   79.09
   2   3  -5  876.91   79.39
  -1  -3   5  168.68   14.20
   1  -3  -5  133.59   14.10
   1  -3  -5  130.49   14.10
   1  -3  -5  140.19   14.10
   0  -3  -5  930.21  106.59
   0  -3   5 1100.29  106.69
   0  -3   5 1203.98  106.49
   0  -3  -5 1256.17  106.49
   0  -3  -5 1121.49  106.59
   0  -3  -5  973.00  106.59
   0   3   5 1048.60  106.59
   0   3  -5 1083.29  106.59
   0   3  -5 1195.48  106.49
  -1  -3  -5  319.37   25.90
  -1  -3  -5  280.57   25.90
   1  -3   5  257.87   25.90
  -1  -3  -5  231.18   26.00
  -1   3  -5  249.97   25.90
  -1   3  -5  230.48   25.90
   1   3   5  291.67   25.90
  -1   3  -5  265.17   25.90
  -2  -3  -5  661.03   61.09
  -2  -3  -5  672.73   61.19
   2  -3   5  546.35   60.99
   2   3   5  623.54   61.19
  -2   3  -5  635.24   61.09
   2   3   5  646.24   61.09
  -3  -3  -5  401.06   38.60
   3  -3   5  392.36   38.80
   3  -3   5  378.66   38.60
  -3  -3  -5  381.36   38.90
  -3   3  -5  406.26   38.60
  -3   3  -5  399.76   38.80
   3   3   5  393.06   38.60
  -3   3  -5  412.16   39.00
   3   3   5  421.86   39.00
   4  -3   5  394.46   35.40
  -4  -3  -5  388.56   35.50
   4  -3   5  308.37   35.00
   4   3   5  361.96   35.40
  -4   3  -5  415.66   35.60
  -4   3  -5  318.67   35.00
   5  -3   5  130.59   12.80
  -5  -3  -5  123.49   12.90
  -5   3  -5  121.09   12.90
   5   3   5  127.69   12.80
   6  -3   5  382.36   36.40
  -6  -3  -5  350.76   36.40
  -6   3  -5  374.56   36.50
   7  -3   5   69.29    7.80
  -7  -3  -5   67.79    8.00
  -7   3  -5   69.09    8.10
   7   3   5   70.29    7.80
  -9  -3  -5   41.90    5.60
   9  -3   5   41.30    5.80
  -9   3  -5   31.00    5.30
   9   3   5   39.60    5.60
  10  -3   5  198.68   21.10
 -10  -3  -5  209.28   21.10
 -10   3  -5  193.78   21.10
  10   3   5  206.58   21.00
  11  -3   5    8.70    4.10
 -11  -3  -5    1.70    4.00
 -11   3  -5    1.10    3.90
  11   3   5    1.80    3.60
  12  -4  -5   66.39    9.80
 -11  -4   5   -2.20    4.00
  11  -4  -5    6.60    3.30
  11  -4  -5    6.10    3.60
  11   4  -5    6.90    3.90
  10  -4  -5   65.49    8.60
  10   4  -5   82.89    8.60
  10   4  -5   65.09    9.30
   9  -4  -5   -1.20    1.90
   9   4  -5    3.50    2.50
  -9   4   5    4.20    2.30
  -9   4   5    1.20    2.30
   9   4  -5    0.00    2.00
   8  -4  -5  213.08   18.30
   8   4  -5  208.78   18.00
  -8   4   5  169.08   18.00
  -8   4   5  158.78   18.20
   8   4  -5  148.49   18.30
  -7  -4   5    3.70    1.90
  -7  -4   5    2.00    1.70
   7  -4  -5    1.10    1.50
   7   4  -5   -0.30    1.50
  -7   4   5    0.70    1.50
   7   4  -5    3.10    1.20
  -7   4   5    2.50    1.50
  -6  -4   5  313.47   31.20
   6  -4  -5  370.06   31.50
  -6  -4   5  285.77   31.50
  -6   4   5  311.17   31.30
   6   4  -5  297.57   31.20
   6   4  -5  346.87   31.60
  -5  -4   5    5.70    1.50
   5  -4  -5    7.80    1.40
   5  -4  -5    4.70    1.20
  -5  -4   5    4.70    1.10
   5   4  -5    4.10    1.40
   5   4  -5    4.10    0.90
  -5   4   5    3.80    1.30
  -5   4   5    3.00    1.10
  -4  -4   5  440.56   40.60
   4  -4  -5  396.66   40.50
   4  -4  -5  436.46   40.30
  -4  -4   5  367.76   40.20
  -4   4   5  430.56   40.30
  -4   4   5  403.76   40.60
   4   4  -5  446.06   40.20
   4   4  -5  400.06   40.60
   3  -4  -5    6.30    0.90
   3  -4  -5    5.80    1.10
  -3  -4   5    6.30    1.30
  -3   4   5    3.00    1.10
   3   4  -5    6.70    0.80
   3   4  -5    6.00    0.80
   3   4  -5    6.90    1.20
  -3   4   5    6.10    1.40
   2  -4  -5   35.40    3.60
   2  -4  -5   35.80    4.00
   2  -4  -5   30.90    3.80
   2   4  -5   32.40    3.90
  -2   4   5   38.50    4.10
  -2   4   5   37.70    3.60
   2   4  -5   34.90    3.50
   2   4  -5   29.00    3.80
   2   4  -5   39.80    3.50
   1  -4  -5   15.00    2.30
   1  -4  -5   17.40    2.10
  -1  -4   5   16.90    2.40
   1  -4  -5   19.90    2.00
  -1  -4   5   25.60    2.40
   1  -4  -5   16.00    2.40
   1   4  -5   21.30    1.90
   1   4  -5   14.70    2.30
   0  -4  -5  339.17   39.90
   0  -4   5  448.56   40.00
   0  -4   5  360.66   39.90
   0  -4   5  455.25   39.80
   0  -4  -5  425.66   39.80
   0  -4  -5  426.66   39.90
   0   4  -5  384.76   39.90
   0   4   5  443.96   40.00
   1  -4   5    0.40    0.60
   1  -4   5    1.20    0.60
  -1  -4  -5    2.50    1.00
  -1  -4  -5    1.20    0.80
   1  -4   5    1.00    0.80
  -1  -4  -5    1.00    0.70
   1   4   5    0.80    0.60
  -1   4  -5    1.10    0.60
  -1   4  -5    1.90    0.80
  -1   4  -5    0.80    0.70
   1   4   5    1.70    0.70
  -2  -4  -5  281.47   28.80
  -2  -4  -5  334.67   29.00
   2  -4   5  286.47   28.80
   2   4   5  313.37   29.00
  -2   4  -5  329.67   28.80
   2   4   5  274.87   28.80
   2   4   5  253.67   28.90
  -3  -4  -5    7.50    1.50
   3  -4   5    7.90    1.20
  -3  -4  -5    8.30    1.20
   3  -4   5    7.70    1.40
  -3   4  -5    8.30    1.70
  -3   4  -5    7.40    1.10
   3   4   5    9.90    1.80
   3   4   5    8.70    1.20
  -3   4  -5    6.30    1.30
   3   4   5    8.40    1.50
  -4  -4  -5   58.59    6.70
   4  -4   5   53.89    6.20
   4  -4   5   55.49    6.50
   4   4   5   71.59    6.10
   4   4   5   71.49    6.70
  -4   4  -5   55.39    6.20
  -4   4  -5   68.59    6.80
   5  -4   5   21.50    2.70
  -5  -4  -5   25.20    3.50
   5  -4   5   24.20    3.40
  -5   4  -5   18.50    3.30
  -5   4  -5   27.00    2.60
   5   4   5   26.30    3.40
   6  -4   5    1.90    1.40
  -6  -4  -5    0.30    1.80
  -6   4  -5    0.30    1.70
   6   4   5    0.30    1.20
  -7  -4  -5    4.30    2.20
   7  -4   5    2.10    1.90
   7   4   5    3.50    1.70
  -7   4  -5    0.70    2.00
  -8  -4  -5   11.40    3.50
  -8   4  -5   16.00    3.50
   8   4   5   17.00    2.90
   9  -4   5    0.70    2.50
  -9  -4  -5    9.60    3.10
  -9   4  -5    3.10    2.90
   9   4   5    5.50    2.50
 -10  -4  -5    1.60    3.40
  10  -4   5   -1.80    2.90
 -10   4  -5   -0.60    3.20
  10   4   5    1.00    2.70
 -11  -4  -5    5.00    4.10
  11  -4   5    5.20    4.10
 -11   4  -5    2.40    4.00
  11   4   5   10.10    3.80
 -12  -5   5   28.50    6.80
  12  -5  -5   29.50    5.60
 -11  -5   5    8.90    4.50
  11  -5  -5    1.60    3.40
  11   5  -5   10.60    4.10
  10  -5  -5  117.39   13.10
  10   5  -5  120.99   13.20
 -10   5   5  119.69   13.10
  -9  -5   5    3.00    2.80
  -9   5   5    3.20    2.30
  -9   5   5    7.20    2.90
   9   5  -5    1.00    1.90
   9   5  -5    0.10    2.50
   8  -5  -5  199.38   18.40
   8   5  -5  181.58   18.10
  -8   5   5  169.48   18.40
  -8   5   5  185.18   18.20
   8   5  -5  170.08   18.50
   7  -5  -5   66.89    6.20
   7  -5  -5   52.29    5.80
  -7  -5   5   37.40    6.00
  -7   5   5   43.40    5.50
   7   5  -5   57.99    5.40
  -7   5   5   47.00    5.90
   7   5  -5   40.90    5.80
  -6  -5   5  272.57   24.30
   6  -5  -5  242.88   24.60
   6  -5  -5  238.38   24.50
  -6  -5   5  237.58   24.70
   6   5  -5  240.58   24.70
  -6   5   5  256.37   24.80
   5  -5  -5   44.80    5.30
  -5  -5   5   45.40    5.00
   5  -5  -5   40.20    5.10
  -5  -5   5   42.80    5.40
  -5   5   5   49.80    5.50
  -5   5   5   56.59    5.10
   5   5  -5   52.19    5.50
   5   5  -5   52.89    4.90
   4  -5  -5  945.61   86.59
   4  -5  -5  854.91   86.79
  -4  -5   5  881.01   86.89
   4   5  -5  819.22   86.89
   4   5  -5  896.41   86.49
  -4   5   5  969.10   86.59
  -3  -5   5  146.19   13.40
   3  -5  -5  127.69   13.20
  -3   5   5  109.39   13.40
  -3   5   5  144.09   13.00
   3   5  -5  136.09   13.40
  -2  -5   5 1340.57  126.19
   2  -5  -5 1236.68  125.89
  -2  -5   5 1338.67  126.19
   2  -5  -5 1238.08  126.09
   2   5  -5 1258.87  126.09
   2   5  -5 1340.27  126.19
  -2   5   5 1374.56  126.29
  -1  -5   5  103.09    9.90
  -1  -5   5  109.89   10.30
   1  -5  -5   88.89   10.10
   1  -5  -5  101.99   10.30
   1  -5  -5   99.09   10.00
  -1  -5   5  106.39   10.20
   1  -5  -5  103.19    9.90
   1   5  -5   94.19   10.20
   1   5  -5  102.49   10.20
  -1   5   5  105.59   10.30
   1   5  -5  104.59    9.90
   0  -5  -5 1512.85  147.79
   0  -5  -5 1697.83  147.99
   0  -5   5 1493.65  147.69
   0  -5  -5 1652.23  147.79
   0  -5   5 1389.66  147.89
   0   5  -5 1414.46  147.69
   0   5  -5 1545.65  147.89
   1  -5   5  392.96   38.80
  -1  -5  -5  424.66   38.90
  -1  -5  -5  334.67   38.80
  -1  -5  -5  459.55   39.00
   1  -5   5  334.27   38.70
   1  -5   5  350.06   38.80
  -1   5  -5  428.56   38.80
   1   5   5  421.66   38.90
  -1   5  -5  449.86   38.90
   1   5   5  366.46   38.80
   1   5   5  437.26   38.90
  -2  -5  -5 1392.56  123.19
   2  -5   5 1238.08  123.19
   2  -5   5 1124.79  123.19
   2   5   5 1227.68  123.29
  -2   5  -5 1381.66  123.19
  -3  -5  -5  206.78   20.40
  -3  -5  -5  219.08   20.10
   3  -5   5  223.38   20.30
   3  -5   5  185.38   20.10
  -3   5  -5  176.38   20.40
  -3   5  -5  192.58   20.10
   3   5   5  212.88   20.30
   3   5   5  220.78   20.10
  -3   5  -5  211.38   20.30
  -4  -5  -5 1256.37  118.29
   4  -5   5 1138.99  118.29
  -4  -5  -5 1202.38  118.69
   4  -5   5 1228.98  118.59
   4   5   5 1301.17  118.29
  -4   5  -5 1316.67  118.79
   4   5   5 1065.89  118.59
  -4   5  -5 1278.97  118.29
  -5  -5  -5   82.39    7.40
  -5  -5  -5   63.69    6.40
   5  -5   5   65.39    6.60
   5  -5   5   56.49    7.00
  -5   5  -5   62.89    7.30
   5   5   5   66.59    7.10
   5   5   5   63.29    6.40
  -5   5  -5   65.09    6.60
   6  -5   5  324.27   31.00
  -6  -5  -5  291.77   31.00
  -6   5  -5  296.67   31.00
   6   5   5  349.67   31.00
  -6   5  -5  301.97   30.40
   7  -5   5    2.10    1.90
  -7  -5  -5    4.10    2.30
   7   5   5    3.60    1.90
  -7   5  -5    4.20    2.20
   8  -5   5  286.57   27.40
  -8  -5  -5  265.37   27.40
  -8   5  -5  262.27   27.30
   9  -5   5   27.20    4.60
  -9  -5  -5   22.80    4.40
  -9   5  -5   25.00    4.70
   9   5   5   33.30    4.50
 -10  -5  -5  135.49   15.50
  10  -5   5  142.39   15.70
 -10   5  -5  143.49   15.60
  10   5   5  143.19   15.30
  11  -5   5   11.10    4.70
 -11  -5  -5   20.60    5.00
  11   5   5   14.10    4.30
 -11   5  -5   11.50    4.70
  11  -6  -5    9.80    3.60
 -11  -6   5   13.30    4.50
  11   6  -5    5.80    4.00
  10  -6  -5   39.20    5.60
 -10  -6   5   27.70    5.50
  10   6  -5   31.80    5.20
 -10   6   5   34.60    5.20
  -9  -6   5    3.20    3.30
   9  -6  -5    6.40    2.40
   9   6  -5    6.50    2.60
  -9   6   5   11.10    3.10
   9   6  -5    8.30    2.30
  -9   6   5    6.30    2.80
  -8  -6   5   75.79    9.50
   8   6  -5   87.59    8.80
   8   6  -5   79.29    9.30
  -8   6   5   91.59    9.40
  -7  -6   5    6.30    2.30
   7  -6  -5    8.10    1.90
  -7   6   5    4.10    1.50
   7   6  -5    3.30    1.80
  -7   6   5    7.10    1.90
   6  -6  -5  238.38   21.10
  -6  -6   5  178.48   21.10
   6  -6  -5  193.38   20.80
  -6  -6   5  211.58   20.70
  -6   6   5  190.58   20.70
   6   6  -5  230.48   20.60
  -6   6   5  239.78   21.30
   5  -6  -5   46.30    5.60
  -5  -6   5   57.79    5.50
   5  -6  -5   55.19    5.90
  -5  -6   5   62.49    6.10
   5   6  -5   59.09    5.40
  -5   6   5   46.10    5.50
   5   6  -5   53.89    6.00
  -5   6   5   57.39    6.10
   4  -6  -5  157.48   15.70
  -4  -6   5  169.98   15.80
  -4   6   5  152.38   15.30
  -4   6   5  156.98   15.90
   4   6  -5  154.58   15.80
   3  -6  -5   80.39    7.50
  -3  -6   5   64.09    7.50
  -2  -6   5  247.48   23.40
   2  -6  -5  231.38   23.30
  -2   6   5  233.28   23.50
   2   6  -5  238.18   23.40
  -1  -6   5   23.30    2.10
   1  -6  -5   23.00    2.80
  -1  -6   5   17.60    2.60
   1  -6  -5   21.50    2.20
  -1  -6   5   20.20    2.90
   1  -6  -5   23.50    2.80
   1  -6  -5   16.00    2.40
  -1   6   5   24.90    2.90
   1   6  -5   20.90    2.60
   1   6  -5   18.70    2.10
   0  -6   5  315.57   27.50
   0  -6   5  292.17   27.20
   0  -6  -5  260.17   27.40
   0  -6  -5  298.57   27.50
   0  -6  -5  268.87   27.20
   0  -6   5  263.07   27.30
   0  -6  -5  288.77   27.20
   0   6  -5  276.47   27.20
   0   6   5  270.97   27.50
   0   6  -5  267.67   27.40
   0   6  -5  277.77   27.40
  -1  -6  -5    4.50    1.20
   1  -6   5    6.10    1.10
   1  -6   5    6.20    1.30
  -1  -6  -5    7.30    1.20
   1  -6   5    5.40    1.00
  -1   6  -5    8.30    1.10
   1   6   5    4.20    1.10
   1   6   5    5.80    1.20
  -2  -6  -5   39.60    4.40
   2  -6   5   36.10    4.50
   2  -6   5   47.40    4.50
   2   6   5   47.60    4.50
   2   6   5   47.90    4.60
   2   6   5   35.20    4.70
  -2   6  -5   35.30    4.40
  -3  -6  -5   60.89    6.30
   3  -6   5   66.79    6.20
  -3  -6  -5   49.30    6.00
   3  -6   5   46.50    6.00
   3   6   5   68.89    6.10
   3   6   5   57.59    6.20
  -3   6  -5   60.29    6.00
  -4  -6  -5    0.00    0.80
   4  -6   5    0.40    1.00
   4  -6   5    2.50    1.10
  -4  -6  -5    1.60    1.20
  -4   6  -5    1.70    0.90
   4   6   5    2.50    0.90
   4   6   5    1.00    1.10
  -4   6  -5   -0.80    1.10
   5  -6   5    1.40    1.20
   5  -6   5    3.40    1.40
  -5  -6  -5    0.70    0.90
  -5  -6  -5    1.10    1.70
  -5   6  -5    2.10    1.00
  -5   6  -5    3.30    1.60
   5   6   5    1.90    1.40
   5   6   5    2.60    0.90
  -6  -6  -5    2.90    1.90
   6  -6   5    0.90    1.30
   6  -6   5    2.60    1.70
  -6   6  -5    3.10    1.90
  -6   6  -5    2.50    1.00
   6   6   5    3.20    1.40
   6   6   5    1.70    0.80
  -7  -6  -5    1.20    2.10
   7  -6   5    0.20    1.80
   7   6   5    3.30    2.00
  -7   6  -5    4.20    2.50
  -7   6  -5    2.70    1.00
   8  -6   5   18.50    3.70
  -8  -6  -5   20.10    3.70
  -8   6  -5   15.80    3.70
  -9  -6  -5    9.30    3.40
   9  -6   5    6.20    3.10
   9   6   5    9.90    3.10
  -9   6  -5    7.50    3.30
  10  -6   5   43.50    6.40
 -10  -6  -5   38.80    6.10
  10   6   5   39.70    5.80
 -10   6  -5   30.80    5.80
  11  -6   5   -0.50    4.10
 -11  -6  -5   -1.60    4.20
 -11   6  -5   -0.70    4.50
  11   6   5    0.20    3.80
 -11  -7   5   82.09   10.10
  11  -7  -5   58.19    9.40
  11   7  -5   88.39   10.10
 -11   7   5   61.09    9.80
  10  -7  -5   20.80    4.20
 -10  -7   5   28.60    5.00
 -10   7   5   25.00    4.50
  10   7  -5   24.40    4.50
  -9  -7   5  110.89   12.20
   9  -7  -5  106.89   11.80
   8  -7  -5   54.99    6.50
  -8   7   5   58.39    6.80
   8   7  -5   52.89    5.80
   8   7  -5   45.20    6.60
   7  -7  -5  280.67   27.20
   7   7  -5  270.97   27.30
   7   7  -5  269.97   26.70
   6  -7  -5  104.99   10.30
  -6  -7   5  112.89   10.90
   6  -7  -5  109.59   10.60
  -6   7   5   83.59   10.10
  -6   7   5  108.99   10.80
   5  -7  -5  467.35   51.29
  -5  -7   5  584.04   51.79
   5  -7  -5  538.15   51.69
  -5   7   5  567.14   51.89
  -5   7   5  458.95   51.19
   5   7  -5  579.94   51.79
  -4  -7   5  184.98   17.90
   4  -7  -5  163.08   17.80
  -4   7   5  188.68   18.10
   4   7  -5  184.28   18.00
   3  -7  -5  395.76   37.60
  -3  -7   5  417.66   37.70
  -3   7   5  323.67   37.70
   3   7  -5  403.96   37.70
  -2  -7   5  266.07   26.20
   2  -7  -5  264.77   26.20
   2   7  -5  263.87   26.30
  -2   7   5  274.07   26.40
  -1  -7   5  740.33   72.99
  -1  -7   5  763.72   73.29
   1  -7  -5  802.42   72.99
   1  -7  -5  647.54   72.99
   1   7  -5  724.43   73.39
   1   7  -5  806.82   72.99
  -1   7   5  807.82   73.49
   0  -7  -5  398.96   36.70
   0  -7   5  378.36   36.40
   0  -7   5  363.16   36.60
   0  -7  -5  371.46   36.40
   0   7  -5  356.66   36.70
   0   7  -5  409.46   36.40
   0   7   5  348.67   36.70
  -1  -7  -5 1081.19   97.29
   1  -7   5 1129.29   97.49
   1  -7   5  994.30   97.29
   1  -7   5 1018.70   97.39
  -1   7  -5  871.61   97.19
   1   7   5  853.81   97.29
   1   7   5 1056.89   97.49
  -1   7  -5 1042.80   97.39
   2  -7   5  265.97   25.60
  -2  -7  -5  283.17   25.70
   2  -7   5  275.97   25.60
   2   7   5  267.17   25.70
  -2   7  -5  228.78   25.60
   2   7   5  248.48   25.70
  -3  -7  -5  469.45   41.10
   3  -7   5  361.26   41.00
   3  -7   5  430.46   41.00
  -3   7  -5  475.35   41.00
   3   7   5  445.96   41.00
   3   7   5  343.87   41.00
  -4  -7  -5  176.68   15.30
  -4  -7  -5  134.59   14.80
   4  -7   5  137.29   15.00
   4  -7   5  163.38   15.20
   4   7   5  158.58   15.10
  -4   7  -5  138.39   15.20
   5  -7   5  249.97   23.50
  -5  -7  -5  236.28   23.30
   5  -7   5  225.48   23.70
  -5  -7  -5  236.38   23.80
  -5   7  -5  225.98   23.90
   5   7   5  252.47   23.40
  -6  -7  -5  124.89   11.90
  -6  -7  -5  105.19   11.10
   6  -7   5  103.79   11.70
  -6   7  -5   99.19   11.80
   6   7   5  134.69   11.80
   6   7   5  110.19   11.20
  -7  -7  -5  293.57   26.80
   7  -7   5  220.98   26.50
   7   7   5  278.67   26.60
  -7   7  -5  273.27   26.00
  -8  -7  -5   79.19    9.10
   8  -7   5   76.09    9.00
   8   7   5   76.59    8.80
  -8   7  -5   76.09    9.10
   9  -7   5  163.48   17.60
  -9  -7  -5  176.08   17.70
  -9   7  -5  150.28   17.60
   9   7   5  175.38   17.50
 -10  -7  -5   39.60    6.10
  10  -7   5   36.50    6.20
  10   7   5   43.00    6.00
 -10   7  -5   25.20    5.80
  11   7   5   51.49    7.30
 -11   7  -5   40.20    7.20
  11  -8  -5   97.09   12.00
 -11  -8   5  113.09   12.50
  11   8  -5  106.49   12.50
 -11   8   5   82.49   12.10
 -10  -8   5   33.60    5.70
  10  -8  -5   37.80    5.50
 -10   8   5   35.30    5.50
  10   8  -5   32.00    5.40
   9  -8  -5  130.09   12.60
  -9  -8   5  110.89   12.90
   9   8  -5  106.69   12.60
  -8  -8   5   46.30    6.70
   8  -8  -5   60.29    6.50
  -8   8   5   54.79    6.60
   8   8  -5   40.40    6.40
  -7  -8   5  131.09   14.10
   7   8  -5  108.69   13.90
   7   8  -5  126.59   13.30
  -7   8   5  144.19   13.40
  -7   8   5  168.18   14.20
  -6  -8   5   17.20    2.90
   6  -8  -5   13.20    2.60
  -6  -8   5   22.40    2.30
   6   8  -5   14.50    2.80
  -6   8   5   17.40    2.90
   6   8  -5   16.20    2.00
  -6   8   5   16.10    2.20
   5  -8  -5  185.78   18.40
  -5  -8   5  189.48   18.50
  -5   8   5  176.28   18.60
   4  -8  -5   31.20    3.70
  -4  -8   5   31.00    3.80
   4   8  -5   31.00    3.90
  -4   8   5   29.50    4.10
   3  -8  -5  158.68   15.50
  -3  -8   5  160.48   15.50
   3   8  -5  136.69   15.50
  -3   8   5  164.68   15.70
   2  -8  -5    0.80    0.80
  -2  -8   5    2.20    1.20
   2   8  -5    4.50    1.20
  -2   8   5    1.80    1.10
  -1  -8   5  149.88   14.70
   1  -8  -5  132.69   14.70
   1  -8  -5  158.38   14.40
  -1  -8   5  149.49   14.40
   1   8  -5  152.98   14.40
   1   8  -5  153.08   14.80
  -1   8   5  133.89   14.90
   0  -8   5    7.00    0.90
   0  -8   5    6.30    1.30
   0  -8  -5    3.40    1.00
   0  -8  -5    4.00    0.90
   0   8  -5    6.20    1.30
   0   8  -5    6.00    1.00
   0   8   5    5.00    1.50
  -1  -8  -5   52.29    5.40
   1  -8   5   61.99    5.40
   1  -8   5   47.90    5.50
  -1  -8  -5   56.89    5.70
   1   8   5   56.39    5.80
   1   8   5   43.30    5.50
  -1   8  -5   54.79    5.60
  -1   8  -5   44.20    5.40
   2  -8   5    1.20    0.80
  -2  -8  -5    1.20    1.20
   2  -8   5   -0.30    0.80
   2  -8   5    0.90    1.40
  -2  -8  -5    1.20    0.90
   2   8   5    0.70    0.90
   2   8   5   -0.70    1.00
  -2   8  -5    2.10    0.90
  -2   8  -5    0.40    1.10
   2   8   5    2.10    1.50
   3  -8   5  118.99   11.30
  -3  -8  -5  109.19   11.20
   3  -8   5   98.49   11.10
   3   8   5  103.89   11.10
   3   8   5  117.99   11.10
  -3   8  -5  109.79   11.00
  -4  -8  -5    1.30    1.40
   4  -8   5    0.60    1.50
  -4  -8  -5   -0.60    1.10
   4  -8   5   -0.80    1.10
   4   8   5   -0.90    1.00
  -4   8  -5    0.90    1.40
  -4   8  -5    1.20    1.00
  -5  -8  -5   20.50    3.00
   5  -8   5   23.30    3.50
  -5  -8  -5   26.70    3.70
   5   8   5   25.60    3.40
  -5   8  -5   30.30    3.30
  -5   8  -5   17.90    3.60
  -6  -8  -5    3.80    2.10
   6  -8   5    1.40    1.80
  -6   8  -5    0.60    2.00
  -6   8  -5    0.60    1.40
   6   8   5    0.70    1.50
   6   8   5    3.60    1.30
   7  -8   5   18.10    3.50
  -7  -8  -5   23.80    3.80
  -7   8  -5   17.00    3.40
  -7   8  -5   21.20    2.80
   7   8   5   19.70    3.20
   8  -8   5    1.90    2.50
  -8  -8  -5   -1.10    2.50
   8   8   5    0.60    2.20
   9  -8   5    2.50    3.00
  -9  -8  -5    1.70    3.30
  -9   8  -5    1.10    3.40
   9   8   5    1.30    2.80
 -10  -8  -5   -2.90    3.40
  10  -8   5    3.30    3.80
  10   8   5   -0.50    3.50
 -10   8  -5   -0.60    3.90
 -11   8  -5   12.80    5.20
  11   8   5   10.80    5.00
  11  -9  -5  101.59   12.80
 -11  -9   5  117.59   13.90
  11   9  -5  124.49   13.20
 -11   9   5   93.69   13.20
  10  -9  -5    1.00    2.90
 -10  -9   5    1.50    4.20
  10   9  -5   -1.70    3.30
 -10   9   5    2.20    3.40
  -9  -9   5  147.79   15.80
   9  -9  -5  147.19   15.30
  -9   9   5  143.99   15.60
   9   9  -5  138.59   15.40
   8  -9  -5    2.70    2.40
  -8  -9   5    6.50    3.00
   8   9  -5    7.40    2.60
  -7  -9   5  191.28   23.00
   7  -9  -5  242.78   23.00
  -7   9   5  253.17   23.20
  -6  -9   5   28.60    4.20
   6  -9  -5   26.50    3.90
  -6   9   5   26.00    3.90
   6   9  -5   28.70    4.10
   5  -9  -5  329.07   38.40
  -5  -9   5  412.56   38.60
  -5   9   5  425.76   38.70
   5   9  -5  404.56   38.60
  -4  -9   5   34.30    4.10
   4  -9  -5   29.10    3.80
  -4   9   5   31.40    4.30
   4   9  -5   32.00    4.10
  -3  -9   5  998.20   95.49
   3   9  -5  969.10   95.49
   2  -9  -5   55.99    6.00
  -2  -9   5   53.39    6.00
  -2   9   5   54.29    6.30
   2   9  -5   60.19    6.20
  -1  -9   5  729.03   82.69
   1  -9  -5  764.82   82.79
   1  -9  -5  953.50   82.39
  -1  -9   5  759.22   82.39
  -1   9   5  929.51   82.99
   1   9  -5  896.01   82.89
   1   9  -5  938.91   82.49
   0  -9   5   83.19    7.60
   0  -9  -5   81.99    8.00
   0  -9   5   71.89    7.80
   0  -9  -5   71.59    7.50
   0   9  -5   76.09    7.90
   0   9  -5   72.59    7.60
   1  -9   5 1033.70  112.99
  -1  -9  -5 1202.78  112.99
   1  -9   5 1229.18  112.99
  -1  -9  -5 1280.17  113.19
   1   9   5 1229.48  113.29
   1   9   5 1002.00  112.99
  -1   9  -5 1199.88  113.19
   2  -9   5    3.80    1.10
   2  -9   5    7.80    1.30
  -2  -9  -5    4.10    1.30
   2   9   5    7.30    1.90
   2   9   5    4.70    1.50
  -2   9  -5    4.30    1.50
  -2   9  -5    4.60    1.40
  -3  -9  -5  889.21   79.69
  -3  -9  -5  883.91   79.79
   3  -9   5  732.63   79.69
  -3   9  -5  923.31   79.79
   3   9   5  729.23   79.79
   3   9   5  772.22   79.79
   4  -9   5   31.90    4.20
  -4  -9  -5   39.20    4.30
  -4  -9  -5   37.10    4.30
   4   9   5   38.80    4.20
   4   9   5   26.00    4.00
  -4   9  -5   31.60    4.60
  -4   9  -5   33.70    4.10
  -5  -9  -5  726.23   64.89
   5   9   5  603.14   64.59
  -5   9  -5  553.84   64.89
   5   9   5  677.93   64.79
  -5   9  -5  762.72   64.69
   6  -9   5    4.50    1.90
  -6  -9  -5    4.00    2.10
   6   9   5    4.80    1.70
   6   9   5    1.30    1.60
  -6   9  -5    4.30    1.70
  -6   9  -5    3.60    2.30
  -7   9  -5  353.36   32.20
   7   9   5  320.77   32.50
  -7   9  -5  303.37   32.70
  -8  -9  -5    4.00    2.80
   8  -9   5    2.00    2.50
  -8   9  -5    1.00    2.80
   8   9   5    2.90    2.30
   9  -9   5  246.68   24.60
  -9  -9  -5  271.87   24.60
  -9   9  -5  222.18   24.40
   9   9   5  215.88   24.20
  10  -9   5    4.60    3.90
 -10  -9  -5   -1.40    3.50
 -10   9  -5    4.40    4.30
  10   9   5    0.10    3.70
 -11  10   5   16.90    5.50
  10 -10  -5    6.70    3.60
 -10 -10   5   15.80    4.70
  10  10  -5   12.20    4.00
 -10  10   5   11.80    4.00
   9 -10  -5   49.40    6.50
  -9 -10   5   42.20    6.50
  -9  10   5   53.59    7.20
   9  10  -5   38.90    6.10
   8 -10  -5    1.50    2.40
  -8 -10   5    3.00    2.90
   8  10  -5    4.60    2.50
  -8  10   5    4.90    2.80
   7 -10  -5   89.39   10.50
  -7 -10   5  103.59   10.70
   7  10  -5   97.49   10.50
   6 -10  -5    4.20    1.80
  -6 -10   5    2.60    2.10
  -6  10   5    4.40    2.00
   6  10  -5    0.50    1.70
   5 -10  -5  142.39   14.40
  -5  10   5  150.98   14.80
   5  10  -5  133.09   14.50
  -4 -10   5   -1.40    1.40
   4 -10  -5   -0.50    1.10
  -4  10   5    0.20    1.40
   4  10  -5    0.60    1.40
   3 -10  -5   29.60    3.40
  -3 -10   5   23.40    3.50
  -3  10   5   24.10    3.80
   3  10  -5   27.10    3.60
   2 -10  -5    6.10    1.50
  -2 -10   5    7.70    1.60
   2  10  -5    3.60    1.50
  -2  10   5    7.20    1.80
   1 -10  -5  105.49   10.00
  -1 -10   5   87.89    9.50
  -1 -10   5  103.99   10.00
   1  10  -5   86.19   10.00
  -1  10   5  108.39   10.20
   0 -10  -5    5.00    0.90
   0 -10   5    3.30    0.80
   0 -10  -5    3.10    1.30
   0 -10   5    3.60    1.20
   0  10   5    3.90    1.00
   0  10   5    2.70    1.50
   0  10  -5    3.00    0.90
   0  10  -5    1.80    1.20
  -1 -10  -5  177.68   19.90
   1 -10   5  233.48   20.10
  -1 -10  -5  207.88   20.30
   1 -10   5  204.38   20.10
   1  10   5  213.78   20.40
  -1  10  -5  216.18   20.30
   1  10   5  177.58   20.10
   2 -10   5   -0.60    0.90
  -2 -10  -5   -0.70    1.00
   2 -10   5   -0.40    0.90
  -2  10  -5   -0.40    1.40
  -2  10  -5   -0.40    1.10
   2  10   5    0.60    1.30
   2  10   5    1.30    1.80
  -3 -10  -5    0.00    1.30
   3 -10   5    1.00    1.10
   3  10   5    0.70    1.40
  -3  10  -5    0.60    1.10
   3  10   5    1.10    1.10
  -4 -10  -5   14.40    2.20
   4 -10   5    6.40    1.90
   4  10   5    8.80    2.00
  -4  10  -5   12.00    2.10
   4  10   5   14.30    2.30
  -4  10  -5    9.70    2.50
   5 -10   5    7.00    2.10
  -5 -10  -5    8.60    2.20
   5  10   5   10.20    2.00
  -5  10  -5    9.40    2.00
   5  10   5   10.70    2.20
  -5  10  -5    9.00    2.50
  -6 -10  -5   40.50    5.00
   6 -10   5   28.30    4.40
  -6  10  -5   29.70    4.60
   6  10   5   30.00    4.30
  -6  10  -5   29.80    4.40
   6  10   5   32.30    4.30
  -7 -10  -5    0.60    2.40
   7 -10   5    1.80    2.10
  -7  10  -5   -1.00    2.50
  -7  10  -5    0.60    1.90
   7  10   5   -2.50    1.90
   8 -10   5   13.50    3.50
  -8 -10  -5    8.40    3.30
   8  10   5   11.30    3.00
  -8  10  -5    6.50    3.10
   9 -10   5    2.60    3.30
  -9 -10  -5   -0.90    3.30
  -9  10  -5    3.60    3.70
   9  10   5   -2.80    2.80
  10 -10   5    5.60    4.10
 -10 -10  -5    6.00    4.40
 -10  10  -5   -2.10    4.40
  10  10   5   -8.50    3.40
  10 -11  -5   70.89    9.40
 -10  11   5   65.69   10.30
  10  11  -5   82.99   10.30
  -9 -11   5   10.90    4.10
   9 -11  -5   12.00    3.40
   9  11  -5   10.90    3.60
  -9  11   5   13.90    3.90
  -8 -11   5   88.49   10.40
   8 -11  -5   80.49   10.10
  -8  11   5  112.79   10.50
   8  11  -5   78.59   10.10
  -7 -11   5   35.60    5.20
   7 -11  -5   32.70    5.10
  -7  11   5   41.40    5.50
  -6 -11   5  185.28   20.10
   6 -11  -5  226.38   20.20
  -6  11   5  207.08   20.30
   6  11  -5  177.38   20.10
  -5 -11   5   40.50    4.90
   5 -11  -5   42.60    4.70
  -5  11   5   32.40    5.00
   5  11  -5   29.40    4.70
  -4 -11   5  478.05   45.40
   4 -11  -5  450.55   45.30
  -4  11   5  461.05   45.60
   3 -11  -5  372.96   39.90
   3  11  -5  497.95   40.30
  -3  11   5  357.96   40.10
  -2 -11   5  447.46   40.90
   2 -11  -5  360.16   40.80
  -2  11   5  391.06   41.10
   2  11  -5  477.15   41.10
  -1 -11   5  233.58   22.00
   1 -11  -5  231.98   22.50
  -1 -11   5  227.28   22.40
  -1  11   5  212.18   22.60
   0 -11  -5  310.97   33.20
   0 -11   5  375.36   33.20
   0 -11  -5  307.07   32.80
   0 -11   5  335.27   32.90
   0  11  -5  380.56   33.40
   0  11   5  343.97   32.90
   0  11  -5  339.97   32.90
   0  11   5  317.97   33.30
  -1 -11  -5  325.67   30.10
   1 -11   5  310.67   29.80
   1 -11   5  348.87   29.90
   1  11   5  300.37   29.90
  -1  11  -5  268.47   29.80
   1  11   5  277.67   30.10
  -2 -11  -5  739.93   68.99
   2 -11   5  762.12   68.89
  -2 -11  -5  668.83   68.69
   2 -11   5  677.73   68.79
  -2  11  -5  696.23   68.99
  -3 -11  -5  312.57   30.20
  -3  11  -5  300.77   30.30
   3  11   5  309.07   30.40
   4 -11   5  441.76   44.40
  -4 -11  -5  494.15   44.40
   4  11   5  484.55   44.50
  -4  11  -5  391.26   44.50
  -4  11  -5  442.36   44.30
   4  11   5  464.85   44.40
  -5 -11  -5  391.06   35.40
  -5  11  -5  336.17   35.50
  -5  11  -5  396.86   35.30
   5  11   5  301.97   35.10
   5  11   5  367.56   35.30
   6 -11   5  187.48   21.10
   6  11   5  238.38   21.10
   6  11   5  202.18   20.90
  -6  11  -5  208.58   21.00
   7 -11   5   75.79   10.40
  -7 -11  -5  113.69   10.80
  -7  11  -5  114.69   10.40
  -7  11  -5   73.29   10.70
  -8 -11  -5  122.29   14.30
   8 -11   5  139.79   14.50
  -8  11  -5  135.39   14.40
   8  11   5  130.39   14.00
  -9 -11  -5   60.99    8.40
   9 -11   5   73.49    8.90
  -9  11  -5   56.29    8.50
   9  11   5   49.60    7.40
 -10 -11  -5   92.19   11.60
  10 -11   5  107.19   11.80
  10  11   5   65.09   10.70
 -10  11  -5   89.19   11.80
  10 -12  -5   56.69    8.30
 -10 -12   5   54.79    8.30
 -10  12   5   46.20    8.00
  10  12  -5   64.99    8.20
  -9 -12   5   43.20    6.60
   9 -12  -5   40.70    6.20
   9  12  -5   50.79    6.70
  -9  12   5   43.40    6.80
   8 -12  -5   47.20    6.30
  -8 -12   5   53.59    6.90
  -8  12   5   44.30    6.70
   8  12  -5   35.50    6.00
  -7 -12   5   20.50    3.70
   7 -12  -5   17.20    3.30
   7  12  -5   14.40    3.50
  -7  12   5   29.00    4.20
   6 -12  -5   28.20    4.00
  -6 -12   5   27.20    4.10
   6  12  -5   25.00    4.20
  -5 -12   5    0.30    1.80
   5 -12  -5    2.00    1.50
  -5  12   5    1.20    2.10
   5  12  -5   -0.50    1.90
  -4 -12   5  224.78   20.10
   4 -12  -5  170.98   20.00
   4  12  -5  217.28   20.30
  -4  12   5  191.18   20.30
   3 -12  -5    6.40    1.60
  -3 -12   5    5.80    1.70
  -3  12   5    9.30    2.40
   3  12  -5    9.70    2.20
   2 -12  -5   54.79    7.30
  -2 -12   5   70.49    7.50
   2  12  -5   78.59    7.80
  -2  12   5   80.39    7.90
  -1 -12   5   27.30    3.10
  -1 -12   5   35.50    3.80
  -1 -12   5   28.90    3.30
   1 -12  -5   26.60    3.80
  -1  12   5   27.60    4.10
   1  12  -5   34.60    4.00
   0 -12  -5  122.69   13.40
   0 -12   5  126.69   13.30
   0 -12   5  129.89   13.10
   0  12  -5  140.79   13.10
   0  12   5  145.99   13.70
   0  12   5  127.49   13.10
   1 -12   5   17.70    2.70
  -1 -12  -5   21.00    3.10
   1 -12   5   21.20    2.90
  -1  12  -5   22.30    3.30
  -1  12  -5   20.50    3.10
   1  12   5   25.70    3.10
   1  12   5   18.30    3.20
  -2 -12  -5    8.60    1.70
   2 -12   5    6.60    1.50
  -2 -12  -5    7.50    2.00
   2 -12   5    7.00    1.70
   2  12   5   11.80    2.30
  -2  12  -5    7.90    1.90
   3 -12   5    7.80    2.10
  -3 -12  -5   15.70    2.40
  -3  12  -5   14.50    2.40
   3  12   5   11.40    2.50
  -4 -12  -5   17.80    2.80
   4 -12   5   14.10    2.50
   4  12   5   14.60    2.70
  -4  12  -5   11.50    2.50
  -4  12  -5   13.80    2.90
   5 -12   5   35.80    5.00
  -5 -12  -5   43.90    5.10
   5  12   5   35.60    4.70
  -5  12  -5   34.10    4.90
  -5  12  -5   35.70    5.40
   5  12   5   38.30    5.10
   6 -12   5    5.80    2.40
  -6 -12  -5   12.00    2.70
   6  12   5    8.10    2.50
   6  12   5    5.50    2.20
  -6  12  -5    5.60    3.00
  -6  12  -5    8.40    2.50
   7 -12   5   13.40    3.20
  -7 -12  -5    9.80    3.30
   7  12   5   12.20    2.80
  -7  12  -5   16.70    3.20
  -7  12  -5    8.00    3.30
   8 -12   5    7.80    3.40
  -8 -12  -5    8.40    3.50
   8  12   5    7.60    2.90
  -8  12  -5   12.20    3.80
   9 -12   5   14.70    4.40
  -9 -12  -5    1.40    4.10
   9  12   5    5.60    3.60
  -9  12  -5   15.10    4.40
  10  12   5    9.00    4.60
 -10  12  -5   25.50    6.00
  10  13  -5   65.99   10.00
 -10  13   5   59.59    8.80
   9 -13  -5   19.70    4.20
  -9 -13   5   19.10    4.90
  -9  13   5   16.90    4.70
   9  13  -5   25.40    5.00
   8 -13  -5  117.29   12.20
  -8 -13   5  108.09   12.50
   8  13  -5  103.09   12.40
  -8  13   5  110.59   12.40
  -7 -13   5   -2.10    2.30
   7 -13  -5    0.60    2.10
  -7  13   5    0.80    2.60
   7  13  -5    0.90    2.60
   6 -13  -5  165.58   17.30
  -6 -13   5  173.58   17.40
   6  13  -5  168.28   17.50
  -5 -13   5    5.20    2.20
  -5  13   5    6.30    2.40
   5  13  -5    4.20    2.20
  -4 -13   5  563.24   49.60
   4 -13  -5  449.16   49.40
  -3 -13   5   18.70    2.80
   3 -13  -5   13.90    2.40
   3  13  -5   13.00    2.70
  -3  13   5   17.70    3.20
   2 -13  -5  344.67   37.40
   2  13  -5  427.16   37.70
  -2  13   5  373.86   37.60
   1 -13  -5    2.00    1.40
  -1 -13   5    3.70    1.10
  -1 -13   5    1.60    0.90
  -1 -13   5    1.80    1.50
  -1  13   5    1.50    1.70
   1  13  -5    0.10    1.40
   0 -13   5  375.06   31.90
   0 -13  -5  298.27   31.50
   0 -13  -5  324.47   32.00
   0  13   5  350.56   31.60
   0  13  -5  297.37   31.60
   0  13  -5  330.17   32.10
   0  13   5  298.37   32.10
  -1 -13  -5   12.40    1.80
  -1 -13  -5    6.80    1.90
   1 -13   5   10.50    1.80
   1 -13   5    6.80    1.60
  -1  13  -5    8.50    2.00
  -1  13  -5   13.00    2.10
   1  13   5    5.90    2.00
   1  13   5    8.50    2.30
  -2 -13  -5  658.43   55.09
   2 -13   5  509.85   55.09
  -2 -13  -5  480.55   55.29
  -2  13  -5  615.34   55.39
  -3 -13  -5   51.69    5.40
  -3 -13  -5   45.00    5.60
   3 -13   5   39.10    5.30
   3  13   5   41.50    5.70
  -3  13  -5   50.79    5.50
  -4 -13  -5  340.47   34.80
   4 -13   5  344.47   34.90
   4  13   5  364.26   35.00
  -4  13  -5  366.96   35.10
   5 -13   5   11.60    2.60
  -5 -13  -5   11.70    2.70
   5  13   5   13.60    2.60
  -5  13  -5    8.40    2.80
  -5  13  -5   11.40    2.70
   5  13   5   11.20    2.80
   6 -13   5  247.48   26.60
  -6  13  -5  276.87   26.60
  -6  13  -5  263.77   26.90
   6  13   5  273.27   26.60
   7 -13   5   13.90    3.40
  -7 -13  -5   13.10    3.80
  -7  13  -5   24.50    3.70
   7  13   5   14.90    3.40
  -8 -13  -5   88.39   10.70
   8 -13   5   90.69   10.70
  -8  13  -5   91.59   10.90
   8  13   5   82.09   10.20
  -9 -13  -5   62.79    9.30
   9 -13   5   74.29    9.60
  -9  13  -5   83.39   10.00
   9  13   5   51.39    8.20
   9 -14  -5    8.70    3.60
  -9 -14   5    4.40    4.10
   9  14  -5   -6.20    3.80
  -9  14   5    4.50    4.10
   8 -14  -5   98.79   12.20
  -8 -14   5  110.89   12.50
  -8  14   5  115.39   12.70
   8  14  -5  113.49   12.70
   7 -14  -5   17.70    3.70
  -7 -14   5   17.90    4.10
  -7  14   5   30.10    4.80
   7  14  -5   16.60    4.00
  -6 -14   5   33.80    5.00
   6 -14  -5   30.00    4.60
   6  14  -5   30.90    4.90
  -6  14   5   37.00    5.20
  -5 -14   5   16.60    3.10
   5 -14  -5   12.60    2.80
  -5  14   5   29.00    4.20
   5  14  -5   19.70    3.40
   4 -14  -5  152.18   16.00
  -4 -14   5  163.28   16.00
  -4  14   5  143.39   16.30
   4  14  -5  163.78   16.20
  -3 -14   5   14.40    2.50
   3 -14  -5    8.30    2.00
   3  14  -5    4.70    2.40
  -3  14   5   10.30    2.60
  -2 -14   5  135.19   14.20
   2 -14  -5  154.08   14.30
  -2  14   5  113.09   14.40
   2  14  -5  154.58   14.50
   1 -14  -5    1.70    1.50
  -1 -14   5    0.40    0.90
  -1 -14   5    1.60    1.50
  -1  14   5   -0.40    2.00
   1  14  -5   -3.80    1.70
   0 -14  -5   46.70    5.70
   0 -14  -5   48.30    5.00
   0 -14   5   46.70    5.50
   0  14   5   49.90    6.20
   0  14  -5   50.39    5.80
   1 -14   5   36.10    3.80
  -1 -14  -5   27.60    4.10
  -1 -14  -5   24.70    3.50
   1 -14   5   26.70    3.70
   1  14   5   27.10    4.20
  -1  14  -5   29.90    4.20
  -2 -14  -5    0.80    1.70
   2 -14   5    0.80    1.40
   2 -14   5    1.00    1.30
  -2 -14  -5    0.80    1.50
  -2  14  -5    3.20    1.80
   2  14   5    0.10    2.00
   3 -14   5    2.50    1.80
  -3 -14  -5   -3.30    1.60
  -3 -14  -5    0.90    1.90
   3  14   5    3.90    2.30
  -3  14  -5    2.00    1.90
  -4 -14  -5   16.20    3.40
   4 -14   5   25.10    3.60
  -4 -14  -5   21.40    3.30
   4  14   5   16.00    3.40
  -4  14  -5   23.70    3.60
  -4  14  -5   23.20    3.70
   5 -14   5    3.40    2.00
  -5 -14  -5    1.40    2.20
  -5  14  -5    3.50    2.60
   5  14   5    1.30    2.30
  -5  14  -5   -3.10    2.20
  -6 -14  -5    0.10    2.50
   6 -14   5    3.10    2.50
   6  14   5    1.30    2.70
  -6  14  -5    2.20    2.60
  -6  14  -5   -0.30    3.10
   7 -14   5    3.20    3.00
  -7 -14  -5    5.00    3.30
  -7  14  -5   11.10    3.50
  -7  14  -5    6.00    3.40
   7  14   5    6.80    2.60
  -8 -14  -5    1.80    3.60
   8 -14   5    2.10    3.40
  -8  14  -5   -3.20    3.90
   8  14   5    1.30    3.00
   9 -14   5   10.30    4.70
  -9 -14  -5   18.00    5.00
   9  14   5    4.40    4.10
  -9  15   5  136.49   15.90
   9  15  -5  134.49   15.60
  -8 -15   5   28.50    5.40
   8 -15  -5   28.50    5.10
   8  15  -5   47.30    6.10
  -8  15   5   28.50    5.50
   7 -15  -5  163.98   18.30
  -7 -15   5  173.38   18.50
   7  15  -5  186.98   18.70
  -7  15   5  182.28   18.70
  -6 -15   5   54.89    6.80
   6 -15  -5   45.80    6.60
  -6  15   5   57.09    7.40
   6  15  -5   49.40    7.00
   5 -15  -5   52.39    7.40
  -5 -15   5   67.19    7.70
  -5  15   5   78.49    8.20
   5  15  -5   61.59    7.80
   4 -15  -5   45.30    6.00
   4  15  -5   51.49    6.50
  -4  15   5   49.00    6.70
   3 -15  -5  207.68   22.20
  -3 -15   5  236.58   22.30
   2 -15  -5   83.99    8.80
  -2 -15   5   93.59    8.90
  -2  15   5   73.59    9.20
   2  15  -5   73.89    9.10
  -1 -15   5  195.38   19.80
   1 -15  -5  219.58   20.40
  -1 -15   5  225.88   20.30
   1  15  -5  191.88   20.40
  -1  15   5  176.18   20.50
   0 -15  -5   73.99    9.10
   0 -15   5   99.99    9.10
   0 -15   5   81.39    8.70
   0 -15  -5   72.99    8.50
   0  15   5   91.59    9.70
   0  15  -5  103.29    9.50
  -1 -15  -5  148.29   15.40
   1 -15   5  182.48   15.80
   1 -15   5  152.38   15.60
  -1 -15  -5  146.39   15.90
   1  15   5  148.59   16.10
   2 -15   5   34.30    4.90
  -2 -15  -5   42.30    4.80
  -2 -15  -5   30.90    5.10
   2 -15   5   45.30    4.80
  -2  15  -5   45.50    5.40
   2  15   5   32.40    5.50
  -3 -15  -5   25.90    3.50
  -3 -15  -5   22.20    3.60
   3 -15   5   18.20    3.30
  -3  15  -5   30.20    4.20
   3  15   5   20.40    3.80
  -4 -15  -5  116.99   12.80
  -4 -15  -5  116.89   13.00
   4 -15   5  112.89   12.90
  -4  15  -5  147.69   13.20
   4  15   5  121.39   13.20
  -4  15  -5  120.49   13.20
  -5 -15  -5   83.99   10.00
   5 -15   5   87.49   10.50
   5  15   5   97.19   10.50
  -5  15  -5   92.69   10.30
  -5  15  -5   96.39   10.60
  -6 -15  -5   93.99   11.10
   6 -15   5  100.59   11.00
  -6  15  -5  106.19   11.30
  -6  15  -5   92.79   11.70
   7 -15   5   40.30    6.00
  -7 -15  -5   31.70    5.60
  -7  15  -5   54.59    7.30
  -7  15  -5   36.20    5.90
  -8 -15  -5   13.70    4.90
   8  15   5   23.50    4.40
  -8 -16   5   34.30    5.90
   8 -16  -5   31.80    5.60
   8  16  -5   30.10    6.00
  -8  16   5   31.30    6.00
  -7 -16   5   40.00    5.80
   7 -16  -5   37.10    5.60
  -7  16   5   31.80    5.80
   7  16  -5   40.90    6.10
   6 -16  -5   34.10    5.20
  -6 -16   5   43.20    5.90
  -6  16   5   37.30    5.70
   6  16  -5   29.80    5.40
  -5 -16   5    3.70    2.80
   5 -16  -5   11.80    2.80
   5  16  -5   10.60    3.40
  -5  16   5   12.80    3.40
  -4 -16   5   22.00    3.40
   4 -16  -5   13.90    3.00
  -4  16   5   12.70    3.60
   4  16  -5   17.20    3.50
   3 -16  -5   25.10    3.50
   3  16  -5   20.40    3.80
  -3  16   5   20.80    4.00
  -2 -16   5   39.20    4.70
   2  16  -5   40.20    5.10
  -2  16   5   23.80    4.60
   1 -16  -5   63.69    8.40
  -1 -16   5   91.49    8.50
   0 -16   5    1.30    1.80
   0 -16  -5    2.20    1.80
   0 -16   5    6.30    1.60
   0  16   5    6.00    2.50
   0  16  -5    5.30    2.60
  -1 -16  -5   38.70    4.70
  -1 -16  -5   32.60    5.30
   1 -16   5   40.40    5.00
   1 -16   5   43.10    5.00
  -1  16  -5   47.90    5.70
   1  16   5   36.10    5.80
  -2 -16  -5   -0.60    1.70
   2 -16   5   -1.30    1.80
   2 -16   5    0.70    1.70
  -2 -16  -5   -1.20    1.90
   2  16   5   -1.10    2.30
  -2  16  -5    1.30    2.10
   3 -16   5   19.50    3.20
  -3 -16  -5   22.00    3.20
  -3 -16  -5   15.10    3.40
  -3  16  -5   19.60    3.60
   3  16   5   15.20    3.80
   4 -16   5    3.10    2.50
  -4 -16  -5   -0.20    2.30
  -4  16  -5    3.30    3.10
   4  16   5    2.80    2.90
   5 -16   5   11.60    3.00
  -5 -16  -5    9.60    3.20
   5  16   5    8.60    3.50
  -5  16  -5   10.90    3.50
  -5  16  -5    9.20    3.30
  -6 -16  -5    2.80    3.20
  -6 -16  -5   10.90    3.30
   6 -16   5    8.20    3.00
  -6  16  -5    3.40    3.30
   6  16   5    7.80    3.60
  -6  16  -5    4.90    3.80
  -7 -16  -5   -2.80    3.40
   7 -16   5   -3.90    3.30
  -7  16  -5    2.20    4.00
   8 -16   5    4.30    3.90
  -8 -16  -5    3.80    4.30
  -8  17   5    5.30    4.40
   8  17  -5    3.20    4.70
  -7 -17   5   77.69   10.40
   7 -17  -5   92.09   10.70
   7  17  -5   94.09   11.10
   6 -17  -5   -2.70    2.60
  -6 -17   5   -1.60    2.80
  -6  17   5   -1.10    3.50
   6  17  -5    3.30    3.30
  -5 -17   5   60.29    7.10
   5 -17  -5   48.00    6.80
  -5  17   5   57.99    7.70
   5  17  -5   48.10    7.00
  -4 -17   5    3.60    2.50
   4 -17  -5    1.70    2.50
  -4  17   5   -5.60    2.50
   4  17  -5   -2.50    2.70
   3 -17  -5  159.68   17.00
  -3  17   5  172.28   17.50
   3  17  -5  164.48   17.30
   2 -17  -5    3.40    2.00
  -2  17   5   -1.40    2.40
   2  17  -5    0.70    2.30
   1 -17  -5  307.57   30.80
  -1  17   5  325.17   31.30
   1  17  -5  298.47   31.00
   0 -17   5    0.40    1.70
   0  17   5    0.90    2.70
   0  17  -5    4.80    2.30
   1 -17   5  332.97   32.30
   1 -17   5  336.77   32.40
   1  17   5  309.07   32.90
  -1  17  -5  331.77   32.80
   2 -17   5    3.50    2.30
  -2 -17  -5    6.40    2.20
   2 -17   5    6.30    2.20
   2  17   5    3.60    2.80
  -2  17  -5    7.00    2.60
   3 -17   5  164.38   17.20
  -3 -17  -5  149.79   17.00
  -3  17  -5  202.68   17.70
   3  17   5  159.58   17.70
  -4 -17  -5   -0.80    2.60
   4 -17   5    1.80    2.70
  -4 -17  -5    7.10    2.90
  -4  17  -5   -0.80    2.70
   4  17   5    5.50    3.30
  -4  17  -5   -1.80    3.00
  -5 -17  -5  243.48   24.20
   5 -17   5  238.68   24.10
  -5 -17  -5  228.88   23.90
   5  17   5  250.17   24.50
  -5  17  -5  222.18   24.20
  -6 -17  -5   -2.90    3.30
   6 -17   5    5.20    3.20
  -6 -17  -5   -0.10    3.30
  -6  17  -5   -1.60    4.00
  -6  17  -5   -3.60    3.50
   6  17   5    2.20    4.30
   7 -17   5  157.78   18.40
  -7 -17  -5  181.28   18.40
   7 -18  -5   44.60    6.60
  -7 -18   5   48.50    6.90
  -7  18   5   41.40    6.90
   7  18  -5   40.40    6.90
   6 -18  -5   24.20    4.40
  -6 -18   5   15.30    4.30
   6  18  -5   22.10    4.90
  -6  18   5   14.60    5.00
  -5 -18   5   36.60    5.40
   5 -18  -5   30.10    5.00
   5  18  -5   32.10    5.50
  -5  18   5   32.50    5.80
  -4 -18   5    3.20    2.50
   4 -18  -5   -3.10    2.40
  -4  18   5   -3.60    3.00
   4  18  -5   -1.90    2.80
   3 -18  -5   20.00    3.90
  -3 -18   5   29.80    4.30
  -3  18   5   31.70    5.10
   3  18  -5   24.80    4.70
  -2 -18   5   -1.40    2.10
   2 -18  -5    0.60    2.00
  -2  18   5   -0.40    3.00
   2  18  -5   -0.90    2.40
   1 -18  -5   10.70    2.80
  -1 -18   5   22.60    3.40
   1  18  -5    9.20    3.40
  -1  18   5   17.10    4.30
   0 -18   5    2.00    2.00
   0 -18  -5   -1.80    2.00
   0  18   5   -0.10    3.20
   0  18  -5   -0.40    2.60
   1 -18   5    9.10    2.30
  -1 -18  -5    6.60    2.80
   1  18   5    5.90    3.20
  -1  18  -5   10.90    3.10
   2 -18   5    6.50    2.40
   2 -18   5    3.70    2.40
  -2 -18  -5    2.50    2.40
   2  18   5    5.60    3.00
  -2  18  -5    5.70    3.00
  -3 -18  -5   23.90    3.70
   3 -18   5   24.20    3.80
  -3 -18  -5   17.60    3.80
   3  18   5   21.30    4.60
  -3  18  -5   20.00    4.20
  -4 -18  -5    4.20    2.90
  -4 -18  -5    3.50    3.20
   4 -18   5    8.20    3.10
  -4  18  -5    7.90    3.20
   4  18   5    8.90    3.80
  -5 -18  -5   -0.30    3.10
   5 -18   5    3.30    3.20
  -5 -18  -5    7.60    3.60
   5  18   5    0.60    3.80
  -5  18  -5   -1.90    3.40
  -5  18  -5   -1.20    3.60
  -6 -18  -5    8.90    3.90
  -6 -18  -5   -2.00    3.70
   6 -18   5    3.20    3.60
  -6  18  -5    2.00    4.00
  -7 -18  -5    6.60    4.50
  -7 -18  -5   -3.60    4.50
   7 -18   5  -10.10    4.10
  -6 -19   5   60.39    8.30
   6 -19  -5   51.59    8.20
  -6  19   5   58.29    8.30
   6  19  -5   51.09    8.00
  -5 -19   5   58.89    9.30
   5 -19  -5   90.19    9.70
   5  19  -5   88.09   10.10
  -5  19   5   73.29   10.20
   4 -19  -5   61.59    7.90
  -4 -19   5   71.09    8.10
   4  19  -5   52.29    8.50
  -4  19   5   52.89    8.00
  -3 -19   5   66.59    7.90
   3 -19  -5   62.39    7.90
  -3  19   5   56.09    8.80
   3  19  -5   66.19    8.50
   2 -19  -5   57.59    8.20
  -2 -19   5   69.79    8.30
   2  19  -5   74.19    8.80
  -2  19   5   84.59    9.50
  -1 -19   5   60.09    7.70
   1 -19  -5   62.59    7.70
   1  19  -5   67.79    8.30
  -1  19   5   63.59    8.90
   0 -19  -5   47.70    6.50
   0 -19   5   46.90    6.40
   0  19   5   49.00    7.10
   0  19  -5   53.99    7.10
  -1 -19  -5   77.19    9.00
   1 -19   5   72.09    8.70
  -1  19  -5   83.79    9.50
   1  19   5   76.79   10.10
  -2 -19  -5   30.60    5.20
  -2  19  -5   37.40    5.60
   2  19   5   42.10    6.10
   3 -19   5   78.19    9.30
  -3 -19  -5   73.49    9.40
   3  19   5   88.79   10.30
  -3  19  -5   66.39    9.70
  -4 -19  -5   77.19    9.60
   4 -19   5   79.79    9.80
  -4  19  -5   86.69   10.50
   4  19   5   81.79   10.40
  -4  19  -5   67.09    9.90
   5 -19   5   63.59    8.20
  -5 -19  -5   60.59    8.10
  -5 -19  -5   48.80    7.00
  -5  19  -5   41.80    7.20
   5  19   5   53.79    7.90
  -6 -19  -5   28.00    6.00
   6 -19   5   43.60    6.10
  -6 -19  -5   45.50    6.40
  -6  19  -5   26.50    6.40
  -6 -20   5   17.90    5.50
  -5 -20   5   33.50    5.20
   5 -20  -5   21.20    5.10
  -5  20   5   40.40    6.40
   5  20  -5   31.30    6.00
  -4 -20   5    2.70    3.40
   4 -20  -5    8.80    3.40
   4  20  -5   14.60    4.50
  -4  20   5    2.40    4.20
   3 -20  -5   18.80    4.00
  -3 -20   5   12.50    3.60
   3  20  -5   17.10    4.50
  -3  20   5   13.00    4.80
   2 -20  -5   12.50    3.60
  -2 -20   5   19.10    3.70
   2  20  -5   15.40    4.10
  -2  20   5   13.20    4.40
   1 -20  -5    8.00    3.00
  -1 -20   5    1.00    2.80
   1  20  -5   -1.60    3.20
  -1  20   5    3.40    4.00
   0 -20  -5   14.80    3.60
   0 -20   5   15.40    3.50
   0  20  -5   19.60    4.30
   0  20   5   25.20    5.10
  -1 -20  -5    0.80    2.90
   1 -20   5    2.20    2.60
  -1  20  -5    3.20    3.40
   1  20   5    5.30    4.30
   2 -20   5    3.60    2.80
  -2 -20  -5    5.40    3.20
  -2  20  -5    9.70    3.70
   2  20   5    7.40    4.10
  -3 -20  -5    4.50    3.60
  -3  20  -5   10.30    4.20
   3  20   5   12.10    4.50
  -4 -20  -5   -2.30    3.50
   4  20   5    8.80    4.80
  -4  20  -5    1.50    3.90
[truncated: 361,758 more chars]
