# Supplementary material for: Practical synthetic strategies towards lipophilic 6-iodotetrahydroquinolines and -dihydroquinolines
Source: Beilstein J Org Chem. 2016 Aug 16;12:1851–62. doi: 10.3762/bjoc.12.174 (PMC5082455; doi:10.3762/bjoc.12.174)
Supplement: File 2 — Crystallographic Information Files of compounds 13, 14, 15b, 19, 29, and 30. [file Beilstein_J_Org_Chem-12-1851-s002.zip › 19_ 1433617.cif]

data_dc248
_audit_creation_date              2015-11-16
_audit_creation_method
;
Olex2 1.2
(compiled 2015.09.30 svn.r3233 for OlexSys, GUI svn.r5103)
;
_shelxl_version_number            2014-3
_publ_contact_author_address      Chemistry Department, Durham University, South Road, Durham, DH1 3LE, UK
_publ_contact_author_email        andy.whiting@durham.ac.uk
_publ_contact_author_name         Andrew Whiting
_publ_contact_author_phone        ?
_publ_requested_journal           Beilstein J. Org. Chem.
_publ_section_references
;
Dolomanov, O.V., Bourhis, L.J., Gildea, R.J, Howard, J.A.K. & Puschmann, H.
 (2009), J. Appl. Cryst. 42, 339-341.

Palatinus, L. & Chapuis, G. (2007). J. Appl. Cryst., 40, 786-790;
Palatinus, L. & van der Lee, A. (2008). J. Appl. Cryst. 41, 975-984;
Palatinus, L., Prathapa, S. J. & van Smaalen, S. (2012). J. Appl. Cryst. 45,
 575-580.

Sheldrick, G.M. (2015). Acta Cryst. C71, 3-8.
;
_chemical_name_common             ?
_chemical_name_systematic
6-Iodo-4,4-dimethyl-1,2,3,4-tetrahydroquinolin-2-one
_chemical_formula_moiety          'C11 H12 I N O'
_chemical_formula_sum             'C11 H12 I N O'
_chemical_formula_weight          301.12
_chemical_melting_point           ?
_chemical_oxdiff_formula          'C11 H12 I N O'
loop_
  _atom_type_symbol
  _atom_type_description
  _atom_type_scat_dispersion_real
  _atom_type_scat_dispersion_imag
  _atom_type_scat_source
 'C' 'C' 0.0033 0.0016 'International Tables Vol C Tables 4.2.6.8 and 6.1.1.4'
 'H' 'H' 0.0000 0.0000 'International Tables Vol C Tables 4.2.6.8 and 6.1.1.4'
 'I' 'I' -0.4742 1.8119 'International Tables Vol C Tables 4.2.6.8 and 6.1.1.4'
 'N' 'N' 0.0061 0.0033 'International Tables Vol C Tables 4.2.6.8 and 6.1.1.4'
 'O' 'O' 0.0106 0.0060 'International Tables Vol C Tables 4.2.6.8 and 6.1.1.4'

_shelx_space_group_comment
;
The symmetry employed for this shelxl refinement is uniquely defined
by the following loop, which should always be used as a source of
symmetry information in preference to the above space-group names.
They are only intended as comments.
;
_space_group_crystal_system       'monoclinic'
_space_group_IT_number            15
_space_group_name_H-M_alt         'C 1 2/c 1'
_space_group_name_Hall            '-C 2yc'
loop_
  _space_group_symop_operation_xyz
 'x, y, z'
 '-x, y, -z+1/2'
 'x+1/2, y+1/2, z'
 '-x+1/2, y+1/2, -z+1/2'
 '-x, -y, -z'
 'x, -y, z-1/2'
 '-x+1/2, -y+1/2, -z'
 'x+1/2, -y+1/2, z-1/2'

_cell_length_a                    18.7230(4)
_cell_length_b                    8.16224(10)
_cell_length_c                    17.8772(4)
_cell_angle_alpha                 90
_cell_angle_beta                  126.024(3)
_cell_angle_gamma                 90
_cell_volume                      2209.57(11)
_cell_formula_units_Z             8
_cell_measurement_reflns_used     33824
_cell_measurement_temperature     120
_cell_measurement_theta_max       37.5910
_cell_measurement_theta_min       2.1770
_shelx_estimated_absorpt_T_max    ?
_shelx_estimated_absorpt_T_min    ?
_exptl_absorpt_coefficient_mu     2.866
_exptl_absorpt_correction_T_max   0.609
_exptl_absorpt_correction_T_min   0.375
_exptl_absorpt_correction_type    analytical
_exptl_absorpt_process_details
;
CrysAlisPro, Agilent Technologies,
Version 1.171.37.31h (release 21-03-2014 CrysAlis171 .NET)
(compiled Mar 21 2014,18:13:45)
Analytical numeric absorption correction using a multifaceted crystal
			model based on expressions derived by R.C. Clark & J.S. Reid.
(Clark, R. C. & Reid, J. S. (1995). Acta Cryst. A51, 887-897)
Empirical absorption correction using spherical harmonics,
 implemented in SCALE3 ABSPACK scaling algorithm.
;
_exptl_crystal_colour             colourless
_exptl_crystal_colour_lustre      .
_exptl_crystal_colour_modifier    .
_exptl_crystal_colour_primary     colourless
_exptl_crystal_density_diffrn     1.810
_exptl_crystal_density_meas       ?
_exptl_crystal_density_method     ?
_exptl_crystal_description        octahedral
_exptl_crystal_F_000              1168
_exptl_crystal_preparation        ?
_exptl_crystal_recrystallization_method
'The material was recrystallised from EtOAc by slow evaporation'
_exptl_crystal_size_max           0.5211
_exptl_crystal_size_mid           0.3649
_exptl_crystal_size_min           0.2118
_exptl_special_details
;
 ?
;
_exptl_transmission_factor_max    ?
_exptl_transmission_factor_min    ?
_diffrn_reflns_av_R_equivalents   0.0350
_diffrn_reflns_av_unetI/netI      0.0129
_diffrn_reflns_Laue_measured_fraction_full 1.000
_diffrn_reflns_Laue_measured_fraction_max 0.979
_diffrn_reflns_limit_h_max        31
_diffrn_reflns_limit_h_min        -32
_diffrn_reflns_limit_k_max        13
_diffrn_reflns_limit_k_min        -13
_diffrn_reflns_limit_l_max        30
_diffrn_reflns_limit_l_min        -30
_diffrn_reflns_number             90313
_diffrn_reflns_point_group_measured_fraction_full 1.000
_diffrn_reflns_point_group_measured_fraction_max 0.979
_diffrn_reflns_theta_full         26.000
_diffrn_reflns_theta_max          37.821
_diffrn_reflns_theta_min          2.502
_diffrn_ambient_temperature       120
_diffrn_detector                  'CCD plate'
_diffrn_detector_area_resol_mean  16.1511
_diffrn_detector_type             Sapphire3
_diffrn_measured_fraction_theta_full 1.000
_diffrn_measured_fraction_theta_max 0.979
_diffrn_measurement_details
;
#__ type_ start__ end____ width___ exp.time_
  1 omega   10.00  107.00   1.0000    5.0000
omega____ theta____ kappa____ phi______ frames
    -       38.2588   77.0000 -180.0000 97

#__ type_ start__ end____ width___ exp.time_
  2 omega  -31.00   67.00   1.0000    5.0000
omega____ theta____ kappa____ phi______ frames
    -       38.2588  -77.0000   60.0000 98

#__ type_ start__ end____ width___ exp.time_
  3 omega    0.00  111.00   1.0000    5.0000
omega____ theta____ kappa____ phi______ frames
    -       38.2588   19.0000 -180.0000 111

#__ type_ start__ end____ width___ exp.time_
  4 omega -112.00  -32.00   1.0000    5.0000
omega____ theta____ kappa____ phi______ frames
    -      -37.3213  178.0000  120.0000 80

#__ type_ start__ end____ width___ exp.time_
  5 omega    3.00   37.00   1.0000    5.0000
omega____ theta____ kappa____ phi______ frames
    -       38.2588   90.0000  -94.8721 34

#__ type_ start__ end____ width___ exp.time_
  6 omega   20.00  107.00   1.0000    5.0000
omega____ theta____ kappa____ phi______ frames
    -       38.2588   57.0000  -60.0000 87

#__ type_ start__ end____ width___ exp.time_
  7 omega   -3.00   23.00   1.0000    5.0000
omega____ theta____ kappa____ phi______ frames
    -       38.2588  101.0000   21.8822 26

#__ type_ start__ end____ width___ exp.time_
  8 omega   35.00  112.00   1.0000    5.0000
omega____ theta____ kappa____ phi______ frames
    -       38.2588  178.0000   60.0000 77

#__ type_ start__ end____ width___ exp.time_
  9 omega   16.00  109.00   1.0000    5.0000
omega____ theta____ kappa____ phi______ frames
    -       38.2588   38.0000   30.0000 93

#__ type_ start__ end____ width___ exp.time_
 10 omega -106.00  -19.00   1.0000    5.0000
omega____ theta____ kappa____ phi______ frames
    -      -37.3213  -57.0000   60.0000 87

#__ type_ start__ end____ width___ exp.time_
 11 omega  -66.00   32.00   1.0000    5.0000
omega____ theta____ kappa____ phi______ frames
    -      -37.3213   77.0000   60.0000 98

#__ type_ start__ end____ width___ exp.time_
 12 omega -112.00  -32.00   1.0000    5.0000
omega____ theta____ kappa____ phi______ frames
    -      -37.3213  178.0000 -180.0000 80

#__ type_ start__ end____ width___ exp.time_
 13 omega -106.00  -19.00   1.0000    5.0000
omega____ theta____ kappa____ phi______ frames
    -      -37.3213  -57.0000    0.0000 87

#__ type_ start__ end____ width___ exp.time_
 14 omega   -4.00   23.00   1.0000    5.0000
omega____ theta____ kappa____ phi______ frames
    -       38.2588  102.0000  174.2607 27

#__ type_ start__ end____ width___ exp.time_
 15 omega   35.00  112.00   1.0000    5.0000
omega____ theta____ kappa____ phi______ frames
    -       38.2588  178.0000 -120.0000 77

#__ type_ start__ end____ width___ exp.time_
 16 omega -106.00  -19.00   1.0000    5.0000
omega____ theta____ kappa____ phi______ frames
    -      -37.3213  -57.0000  150.0000 87

#__ type_ start__ end____ width___ exp.time_
 17 omega  -87.00   10.00   1.0000    5.0000
omega____ theta____ kappa____ phi______ frames
    -      -37.3213  117.0000  164.0000 97

#__ type_ start__ end____ width___ exp.time_
 18 omega -107.00   -9.00   1.0000    5.0000
omega____ theta____ kappa____ phi______ frames
    -      -37.3213  -77.0000  -60.0000 98

#__ type_ start__ end____ width___ exp.time_
 19 omega   16.00  109.00   1.0000    5.0000
omega____ theta____ kappa____ phi______ frames
    -       38.2588   38.0000  -90.0000 93

#__ type_ start__ end____ width___ exp.time_
 20 omega  -24.00   79.00   1.0000    5.0000
omega____ theta____ kappa____ phi______ frames
    -       38.2588 -100.0000   30.0000 103

#__ type_ start__ end____ width___ exp.time_
 21 omega   10.00  107.00   1.0000    5.0000
omega____ theta____ kappa____ phi______ frames
    -       38.2588   77.0000  120.0000 97

#__ type_ start__ end____ width___ exp.time_
 22 omega -107.00   -9.00   1.0000    5.0000
omega____ theta____ kappa____ phi______ frames
    -      -37.3213  -77.0000 -150.0000 98

#__ type_ start__ end____ width___ exp.time_
 23 omega -106.00  -19.00   1.0000    5.0000
omega____ theta____ kappa____ phi______ frames
    -      -37.3213  -57.0000 -150.0000 87

#__ type_ start__ end____ width___ exp.time_
 24 omega   35.00  112.00   1.0000    5.0000
omega____ theta____ kappa____ phi______ frames
    -       38.2588  178.0000    0.0000 77

#__ type_ start__ end____ width___ exp.time_
 25 omega   10.00  107.00   1.0000    5.0000
omega____ theta____ kappa____ phi______ frames
    -       38.2588   77.0000  -30.0000 97

#__ type_ start__ end____ width___ exp.time_
 26 omega   10.00  107.00   1.0000    5.0000
omega____ theta____ kappa____ phi______ frames
    -       38.2588   77.0000   30.0000 97

#__ type_ start__ end____ width___ exp.time_
 27 omega  -32.00   61.00   1.0000    5.0000
omega____ theta____ kappa____ phi______ frames
    -       38.2588  -38.0000  120.0000 93

#__ type_ start__ end____ width___ exp.time_
 28 omega -107.00  -76.00   1.0000    5.0000
omega____ theta____ kappa____ phi______ frames
    -      -37.3213  -77.0000  120.0000 31

#__ type_ start__ end____ width___ exp.time_
 29 omega -106.00  -19.00   1.0000    5.0000
omega____ theta____ kappa____ phi______ frames
    -      -37.3213  -57.0000  -30.0000 87
;
_diffrn_measurement_device        'four-circle diffractometer'
_diffrn_measurement_device_type   'Xcalibur, Sapphire3'
_diffrn_measurement_method        '\w scans'
_diffrn_orient_matrix_UB_11       -0.0229831000
_diffrn_orient_matrix_UB_12       -0.0439601000
_diffrn_orient_matrix_UB_13       0.0139967000
_diffrn_orient_matrix_UB_21       -0.0200705000
_diffrn_orient_matrix_UB_22       0.0737919000
_diffrn_orient_matrix_UB_23       -0.0000936000
_diffrn_orient_matrix_UB_31       -0.0355418000
_diffrn_orient_matrix_UB_32       -0.0132537000
_diffrn_orient_matrix_UB_33       -0.0470045000
_diffrn_radiation_monochromator   graphite
_diffrn_radiation_probe           x-ray
_diffrn_radiation_type            MoK\a
_diffrn_radiation_wavelength      0.71073
_diffrn_source                    'Enhance (Mo) X-ray Source'
_diffrn_source_current            35
_diffrn_source_voltage            50
_diffrn_special_details           'High resolution dataset'
_reflns_Friedel_coverage          0.000
_reflns_Friedel_fraction_full     .
_reflns_Friedel_fraction_max      .
_reflns_number_gt                 5216
_reflns_number_total              5817
_reflns_odcompleteness_completeness 99.96
_reflns_odcompleteness_iscentric  1
_reflns_odcompleteness_theta      26.32
_reflns_special_details
;
 Reflections were merged by SHELXL according to the crystal
 class for the calculation of statistics and refinement.
 
 _reflns_Friedel_fraction is defined as the number of unique
 Friedel pairs measured divided by the number that would be
 possible theoretically, ignoring centric projections and
 systematic absences.
;
_reflns_threshold_expression      'I > 2\s(I)'
_computing_cell_refinement
;
CrysAlisPro, Agilent Technologies,
Version 1.171.37.31h (release 21-03-2014 CrysAlis171 .NET)
(compiled Mar 21 2014,18:13:45)
;
_computing_data_collection
;
CrysAlisPro, Agilent Technologies,
Version 1.171.37.31h (release 21-03-2014 CrysAlis171 .NET)
(compiled Mar 21 2014,18:13:45)
;
_computing_data_reduction
;
CrysAlisPro, Agilent Technologies,
Version 1.171.37.31h (release 21-03-2014 CrysAlis171 .NET)
(compiled Mar 21 2014,18:13:45)
;
_computing_molecular_graphics     'Olex2 (Dolomanov et al., 2009)'
_computing_publication_material   'Olex2 (Dolomanov et al., 2009)'
_computing_structure_refinement   'ShelXL (Sheldrick, 2015)'
_computing_structure_solution
;
Superflip (Palatinus & Chapuis, 2007;Palatinus & van der Lee, 2008;
Palatinus et al., 2012)
;
_refine_diff_density_max          0.567
_refine_diff_density_min          -0.460
_refine_diff_density_rms          0.081
_refine_ls_extinction_coef        .
_refine_ls_extinction_method      none
_refine_ls_goodness_of_fit_ref    1.088
_refine_ls_hydrogen_treatment     constr
_refine_ls_matrix_type            full
_refine_ls_number_parameters      129
_refine_ls_number_reflns          5817
_refine_ls_number_restraints      0
_refine_ls_R_factor_all           0.0233
_refine_ls_R_factor_gt            0.0190
_refine_ls_restrained_S_all       1.088
_refine_ls_shift/su_max           0.001
_refine_ls_shift/su_mean          0.000
_refine_ls_structure_factor_coef  Fsqd
_refine_ls_weighting_details
'w=1/[\s^2^(Fo^2^)+(0.0215P)^2^+1.5131P] where P=(Fo^2^+2Fc^2^)/3'
_refine_ls_weighting_scheme       calc
_refine_ls_wR_factor_gt           0.0470
_refine_ls_wR_factor_ref          0.0486
_refine_special_details           ?
_olex2_refinement_description
;
1. Fixed Uiso
 At 1.2 times of:
  All C(H) groups, All C(H,H) groups, All N(H) groups
 At 1.5 times of:
  All C(H,H,H) groups
2.a Secondary CH2 refined with riding coordinates:
 C8(H8A,H8B)
2.b Aromatic/amide H refined with riding coordinates:
 N1(H1), C3(H3), C5(H5), C6(H6)
2.c Idealised Me refined as rotating group:
 C10(H10A,H10B,H10C), C11(H11A,H11B,H11C)
;
_atom_sites_solution_hydrogens    geom
_atom_sites_solution_primary      ?
_atom_sites_solution_secondary    ?
loop_
  _atom_site_label
  _atom_site_type_symbol
  _atom_site_fract_x
  _atom_site_fract_y
  _atom_site_fract_z
  _atom_site_U_iso_or_equiv
  _atom_site_adp_type
  _atom_site_occupancy
  _atom_site_site_symmetry_order
  _atom_site_calc_flag
  _atom_site_refinement_flags_posn
  _atom_site_refinement_flags_adp
  _atom_site_refinement_flags_occupancy
  _atom_site_disorder_assembly
  _atom_site_disorder_group
 I1 I 0.23104(2) 0.42462(2) 0.17555(2) 0.02409(2) Uani 1 1 d . . . . .
 O1 O 0.77672(5) 0.42792(10) 0.57093(6) 0.02332(15) Uani 1 1 d . . . . .
 N1 N 0.64141(5) 0.34139(11) 0.45147(6) 0.01874(14) Uani 1 1 d . . . . .
 H1 H 0.6650 0.2553 0.4441 0.022 Uiso 1 1 calc R . . . .
 C1 C 0.54936(6) 0.36087(12) 0.39156(6) 0.01555(14) Uani 1 1 d . . . . .
 C2 C 0.51133(6) 0.51447(11) 0.38267(6) 0.01465(14) Uani 1 1 d . . . . .
 C3 C 0.41976(6) 0.52946(12) 0.32029(7) 0.01640(15) Uani 1 1 d . . . . .
 H3 H 0.3924 0.6321 0.3130 0.020 Uiso 1 1 calc R . . . .
 C4 C 0.36827(6) 0.39489(13) 0.26870(7) 0.01689(15) Uani 1 1 d . . . . .
 C5 C 0.40580(6) 0.24260(12) 0.27806(7) 0.01791(15) Uani 1 1 d . . . . .
 H5 H 0.3700 0.1515 0.2429 0.021 Uiso 1 1 calc R . . . .
 C6 C 0.49719(6) 0.22645(12) 0.34026(7) 0.01802(15) Uani 1 1 d . . . . .
 H6 H 0.5241 0.1232 0.3478 0.022 Uiso 1 1 calc R . . . .
 C7 C 0.69578(6) 0.44860(12) 0.52010(7) 0.01805(16) Uani 1 1 d . . . . .
 C8 C 0.65110(7) 0.58950(13) 0.53127(7) 0.01950(17) Uani 1 1 d . . . . .
 H8A H 0.6946 0.6783 0.5660 0.023 Uiso 1 1 calc R . . . .
 H8B H 0.6301 0.5529 0.5681 0.023 Uiso 1 1 calc R . . . .
 C9 C 0.57225(6) 0.65758(12) 0.43794(7) 0.01637(15) Uani 1 1 d . . . . .
 C10 C 0.52678(7) 0.79069(14) 0.45665(9) 0.0255(2) Uani 1 1 d . . . . .
 H10A H 0.4783 0.8387 0.3979 0.038 Uiso 1 1 calc GR . . . .
 H10B H 0.5697 0.8762 0.4957 0.038 Uiso 1 1 calc GR . . . .
 H10C H 0.5034 0.7421 0.4883 0.038 Uiso 1 1 calc GR . . . .
 C11 C 0.60621(7) 0.73192(14) 0.38541(8) 0.02296(18) Uani 1 1 d . . . . .
 H11A H 0.6344 0.6463 0.3727 0.034 Uiso 1 1 calc GR . . . .
 H11B H 0.6493 0.8181 0.4231 0.034 Uiso 1 1 calc GR . . . .
 H11C H 0.5566 0.7789 0.3269 0.034 Uiso 1 1 calc GR . . . .

loop_
  _atom_site_aniso_label
  _atom_site_aniso_U_11
  _atom_site_aniso_U_22
  _atom_site_aniso_U_33
  _atom_site_aniso_U_23
  _atom_site_aniso_U_13
  _atom_site_aniso_U_12
 I1 0.01047(3) 0.02740(4) 0.02486(4) -0.00237(2) 0.00509(3) -0.00073(2)
 O1 0.0117(3) 0.0197(3) 0.0242(4) 0.0020(3) 0.0026(3) -0.0008(2)
 N1 0.0112(3) 0.0169(3) 0.0197(3) -0.0003(3) 0.0045(3) -0.0001(2)
 C1 0.0110(3) 0.0165(4) 0.0152(3) 0.0007(3) 0.0055(3) -0.0012(3)
 C2 0.0122(3) 0.0155(3) 0.0147(3) 0.0001(3) 0.0070(3) -0.0019(3)
 C3 0.0124(3) 0.0176(4) 0.0172(4) 0.0000(3) 0.0076(3) -0.0008(3)
 C4 0.0105(3) 0.0215(4) 0.0155(3) -0.0003(3) 0.0059(3) -0.0015(3)
 C5 0.0134(3) 0.0182(4) 0.0177(4) -0.0021(3) 0.0066(3) -0.0031(3)
 C6 0.0143(3) 0.0160(4) 0.0192(4) -0.0006(3) 0.0073(3) -0.0010(3)
 C7 0.0130(3) 0.0171(4) 0.0167(4) 0.0021(3) 0.0046(3) -0.0021(3)
 C8 0.0151(4) 0.0217(4) 0.0166(4) -0.0022(3) 0.0065(3) -0.0024(3)
 C9 0.0125(3) 0.0158(4) 0.0178(4) -0.0017(3) 0.0073(3) -0.0025(3)
 C10 0.0185(4) 0.0226(5) 0.0300(5) -0.0082(4) 0.0113(4) -0.0012(3)
 C11 0.0211(4) 0.0219(4) 0.0242(4) 0.0019(4) 0.0124(4) -0.0053(3)

_geom_special_details
;
 All esds (except the esd in the dihedral angle between two l.s. planes)
 are estimated using the full covariance matrix.  The cell esds are taken
 into account individually in the estimation of esds in distances, angles
 and torsion angles; correlations between esds in cell parameters are only
 used when they are defined by crystal symmetry.  An approximate (isotropic)
 treatment of cell esds is used for estimating esds involving l.s. planes.
;
loop_
  _geom_bond_atom_site_label_1
  _geom_bond_atom_site_label_2
  _geom_bond_distance
  _geom_bond_site_symmetry_2
  _geom_bond_publ_flag
 I1 C4 2.0979(9) . ?
 O1 C7 1.2373(12) . ?
 N1 H1 0.8800 . ?
 N1 C1 1.4042(12) . ?
 N1 C7 1.3558(13) . ?
 C1 C2 1.4038(14) . ?
 C1 C6 1.3947(13) . ?
 C2 C3 1.3960(13) . ?
 C2 C9 1.5219(13) . ?
 C3 H3 0.9500 . ?
 C3 C4 1.3930(14) . ?
 C4 C5 1.3888(14) . ?
 C5 H5 0.9500 . ?
 C5 C6 1.3941(13) . ?
 C6 H6 0.9500 . ?
 C7 C8 1.5030(15) . ?
 C8 H8A 0.9900 . ?
 C8 H8B 0.9900 . ?
 C8 C9 1.5411(14) . ?
 C9 C10 1.5336(15) . ?
 C9 C11 1.5353(14) . ?
 C10 H10A 0.9800 . ?
 C10 H10B 0.9800 . ?
 C10 H10C 0.9800 . ?
 C11 H11A 0.9800 . ?
 C11 H11B 0.9800 . ?
 C11 H11C 0.9800 . ?

loop_
  _geom_angle_atom_site_label_1
  _geom_angle_atom_site_label_2
  _geom_angle_atom_site_label_3
  _geom_angle
  _geom_angle_site_symmetry_1
  _geom_angle_site_symmetry_3
  _geom_angle_publ_flag
 C1 N1 H1 118.4 . . ?
 C7 N1 H1 118.4 . . ?
 C7 N1 C1 123.28(9) . . ?
 C2 C1 N1 120.05(8) . . ?
 C6 C1 N1 118.90(9) . . ?
 C6 C1 C2 121.04(8) . . ?
 C1 C2 C9 118.39(8) . . ?
 C3 C2 C1 118.13(8) . . ?
 C3 C2 C9 123.42(8) . . ?
 C2 C3 H3 119.8 . . ?
 C4 C3 C2 120.42(9) . . ?
 C4 C3 H3 119.8 . . ?
 C3 C4 I1 118.82(7) . . ?
 C5 C4 I1 119.73(7) . . ?
 C5 C4 C3 121.46(9) . . ?
 C4 C5 H5 120.7 . . ?
 C4 C5 C6 118.52(9) . . ?
 C6 C5 H5 120.7 . . ?
 C1 C6 H6 119.8 . . ?
 C5 C6 C1 120.43(9) . . ?
 C5 C6 H6 119.8 . . ?
 O1 C7 N1 121.34(10) . . ?
 O1 C7 C8 122.94(9) . . ?
 N1 C7 C8 115.71(9) . . ?
 C7 C8 H8A 109.1 . . ?
 C7 C8 H8B 109.1 . . ?
 C7 C8 C9 112.69(8) . . ?
 H8A C8 H8B 107.8 . . ?
 C9 C8 H8A 109.1 . . ?
 C9 C8 H8B 109.1 . . ?
 C2 C9 C8 107.52(8) . . ?
 C2 C9 C10 112.66(8) . . ?
 C2 C9 C11 109.16(8) . . ?
 C10 C9 C8 108.69(8) . . ?
 C10 C9 C11 109.65(9) . . ?
 C11 C9 C8 109.09(8) . . ?
 C9 C10 H10A 109.5 . . ?
 C9 C10 H10B 109.5 . . ?
 C9 C10 H10C 109.5 . . ?
 H10A C10 H10B 109.5 . . ?
 H10A C10 H10C 109.5 . . ?
 H10B C10 H10C 109.5 . . ?
 C9 C11 H11A 109.5 . . ?
 C9 C11 H11B 109.5 . . ?
 C9 C11 H11C 109.5 . . ?
 H11A C11 H11B 109.5 . . ?
 H11A C11 H11C 109.5 . . ?
 H11B C11 H11C 109.5 . . ?

loop_
  _geom_hbond_atom_site_label_D
  _geom_hbond_atom_site_label_H
  _geom_hbond_atom_site_label_A
  _geom_hbond_distance_DH
  _geom_hbond_distance_HA
  _geom_hbond_distance_DA
  _geom_hbond_angle_DHA
  _geom_hbond_site_symmetry_A
 N1 H1 O1 0.88 1.96 2.8397(12) 176.5 7_656

loop_
  _geom_torsion_atom_site_label_1
  _geom_torsion_atom_site_label_2
  _geom_torsion_atom_site_label_3
  _geom_torsion_atom_site_label_4
  _geom_torsion
  _geom_torsion_site_symmetry_1
  _geom_torsion_site_symmetry_2
  _geom_torsion_site_symmetry_3
  _geom_torsion_site_symmetry_4
  _geom_torsion_publ_flag
 I1 C4 C5 C6 179.81(7) . . . . ?
 O1 C7 C8 C9 142.50(10) . . . . ?
 N1 C1 C2 C3 178.13(9) . . . . ?
 N1 C1 C2 C9 1.03(13) . . . . ?
 N1 C1 C6 C5 -178.07(9) . . . . ?
 N1 C7 C8 C9 -39.05(12) . . . . ?
 C1 N1 C7 O1 -179.30(10) . . . . ?
 C1 N1 C7 C8 2.22(14) . . . . ?
 C1 C2 C3 C4 0.01(14) . . . . ?
 C1 C2 C9 C8 -35.05(11) . . . . ?
 C1 C2 C9 C10 -154.78(9) . . . . ?
 C1 C2 C9 C11 83.17(10) . . . . ?
 C2 C1 C6 C5 0.71(15) . . . . ?
 C2 C3 C4 I1 -179.74(7) . . . . ?
 C2 C3 C4 C5 0.55(15) . . . . ?
 C3 C2 C9 C8 148.02(9) . . . . ?
 C3 C2 C9 C10 28.28(13) . . . . ?
 C3 C2 C9 C11 -93.77(11) . . . . ?
 C3 C4 C5 C6 -0.48(15) . . . . ?
 C4 C5 C6 C1 -0.15(15) . . . . ?
 C6 C1 C2 C3 -0.63(14) . . . . ?
 C6 C1 C2 C9 -177.73(9) . . . . ?
 C7 N1 C1 C2 18.10(14) . . . . ?
 C7 N1 C1 C6 -163.11(10) . . . . ?
 C7 C8 C9 C2 53.24(10) . . . . ?
 C7 C8 C9 C10 175.47(9) . . . . ?
 C7 C8 C9 C11 -65.02(11) . . . . ?
 C9 C2 C3 C4 176.96(9) . . . . ?

_shelx_res_file
;
TITL DC248 in C2/c
CELL 0.71073 18.722987 8.162238 17.877238 90 126.0243 90
ZERR 8 0.000407 0.000104 0.000437 0 0.0034 0
LATT 7
SYMM -X,+Y,0.5-Z
SFAC C H I N O
UNIT 88 96 8 8 8
EQIV $1 1.5-X,0.5-Y,1-Z

L.S. 10 0 0
PLAN  20
TEMP -153.15
HTAB N1 O1_$1
MORE -1
BOND $H
CONF
fmap 2 53
acta 52
REM <olex2.extras>
REM <HklSrc "%./DC248.hkl">
REM </olex2.extras>

WGHT    0.021500    1.513100
FVAR       1.81662
I1    3    0.231036    0.424616    0.175545    11.00000    0.01047    0.02740 =
         0.02486   -0.00237    0.00509   -0.00073
O1    5    0.776718    0.427918    0.570930    11.00000    0.01174    0.01972 =
         0.02418    0.00195    0.00260   -0.00084
N1    4    0.641411    0.341386    0.451474    11.00000    0.01122    0.01693 =
         0.01973   -0.00031    0.00446   -0.00007
AFIX  43
H1    2    0.664989    0.255285    0.444114    11.00000   -1.20000
AFIX   0
C1    1    0.549355    0.360873    0.391558    11.00000    0.01102    0.01654 =
         0.01516    0.00072    0.00552   -0.00123
C2    1    0.511330    0.514466    0.382674    11.00000    0.01217    0.01548 =
         0.01473    0.00008    0.00704   -0.00194
C3    1    0.419764    0.529455    0.320287    11.00000    0.01239    0.01764 =
         0.01723   -0.00003    0.00763   -0.00083
AFIX  43
H3    2    0.392394    0.632080    0.312967    11.00000   -1.20000
AFIX   0
C4    1    0.368274    0.394894    0.268700    11.00000    0.01054    0.02153 =
         0.01546   -0.00026    0.00590   -0.00147
C5    1    0.405803    0.242600    0.278057    11.00000    0.01339    0.01820 =
         0.01767   -0.00210    0.00664   -0.00309
AFIX  43
H5    2    0.370001    0.151466    0.242854    11.00000   -1.20000
AFIX   0
C6    1    0.497186    0.226447    0.340261    11.00000    0.01433    0.01597 =
         0.01917   -0.00062    0.00730   -0.00098
AFIX  43
H6    2    0.524101    0.123210    0.347758    11.00000   -1.20000
AFIX   0
C7    1    0.695781    0.448596    0.520097    11.00000    0.01295    0.01712 =
         0.01668    0.00205    0.00461   -0.00206
C8    1    0.651098    0.589498    0.531272    11.00000    0.01507    0.02168 =
         0.01663   -0.00224    0.00647   -0.00236
AFIX  23
H8A   2    0.694634    0.678293    0.566037    11.00000   -1.20000
H8B   2    0.630120    0.552858    0.568060    11.00000   -1.20000
AFIX   0
C9    1    0.572247    0.657584    0.437940    11.00000    0.01254    0.01582 =
         0.01780   -0.00166    0.00728   -0.00247
C10   1    0.526782    0.790692    0.456653    11.00000    0.01854    0.02260 =
         0.03001   -0.00824    0.01133   -0.00117
AFIX 137
H10A  2    0.478250    0.838748    0.397885    11.00000   -1.50000
H10B  2    0.569654    0.876246    0.495733    11.00000   -1.50000
H10C  2    0.503390    0.742143    0.488300    11.00000   -1.50000
AFIX   0
C11   1    0.606215    0.731921    0.385410    11.00000    0.02114    0.02194 =
         0.02416    0.00195    0.01241   -0.00533
AFIX 137
H11A  2    0.634397    0.646251    0.372682    11.00000   -1.50000
H11B  2    0.649328    0.818091    0.423085    11.00000   -1.50000
H11C  2    0.556601    0.778874    0.326931    11.00000   -1.50000
AFIX   0
HKLF 4

REM  DC248 in C2/c
REM R1 =  0.0190 for    5216 Fo > 4sig(Fo)  and  0.0233 for all    5817 data
REM    129 parameters refined using      0 restraints

END

WGHT      0.0215      1.5131

REM Highest difference peak  0.567,  deepest hole -0.460,  1-sigma level  0.081
Q1    1   0.2610  0.4383  0.1596  11.00000  0.05    0.57
Q2    1   0.2184  0.4738  0.1982  11.00000  0.05    0.50
Q3    1   0.3962  0.4643  0.2965  11.00000  0.05    0.46
Q4    1   0.5213  0.2973  0.3636  11.00000  0.05    0.46
Q5    1   0.3821  0.3211  0.2667  11.00000  0.05    0.45
Q6    1   0.2586  0.3884  0.2167  11.00000  0.05    0.44
Q7    1   0.5941  0.7041  0.4202  11.00000  0.05    0.43
Q8    1   0.5279  0.4369  0.3785  11.00000  0.05    0.43
Q9    1   0.4640  0.5161  0.3561  11.00000  0.05    0.40
Q10   1   0.4526  0.2262  0.3077  11.00000  0.05    0.39
Q11   1   0.5437  0.7207  0.4423  11.00000  0.05    0.39
Q12   1   0.5970  0.3498  0.4266  11.00000  0.05    0.38
Q13   1   0.1998  0.4189  0.1242  11.00000  0.05    0.37
Q14   1   0.7387  0.4379  0.5458  11.00000  0.05    0.36
Q15   1   0.5352  0.5847  0.4085  11.00000  0.05    0.36
Q16   1   0.6631  0.3956  0.4760  11.00000  0.05    0.35
Q17   1   0.2361  0.5143  0.1798  11.00000  0.05    0.34
Q18   1   0.6052  0.6171  0.4807  11.00000  0.05    0.32
Q19   1   0.2556  0.4554  0.2260  11.00000  0.05    0.32
Q20   1   0.6625  0.5036  0.5223  11.00000  0.05    0.26
;
_shelx_res_checksum               53706
_shelx_hkl_file
;
   0   0  -2 36671.1 510.570  24
   0   0  -2 8387.44 413.105   4
   0   0  -2 37174.7 489.093  27
   0   0  -2 35387.4 471.052  11
   0   0  -2 37604.6 516.911   8
   0   0  -2 12841.2 441.689  17
   0   0  -2 36617.7 514.030  15
   0   0  -2 37653.7 542.230  20
   0   0  -2 38469.4 559.601   2
   0   0  -2 8767.21 396.270  12
   0   0  -3 62.8331 27.4059  27
   0   0  -3 171.760 38.1155  24
   0   0  -3 86.3228 30.3860  12
   0   0  -3 150.121 51.2891  17
   0   0  -3 154.200 39.4278  15
   0   0  -3 127.685 41.7741   2
   0   0  -3 175.186 33.6251  11
   0   0  -3 155.015 49.6626   4
   0   0  -3 142.256 39.6393   8
   0   0  -3 196.082 47.1436  20
   0   0  -4 37814.5 910.610  17
   0   0  -4 38935.7 914.505   4
   0   0  -4 39145.0 785.562  11
   0   0  -4 40885.9 882.010  20
   0   0  -4 39785.2 833.864  24
   0   0  -4 38568.4 799.777  27
   0   0   4 40518.1 740.554   3
   0   0  -4 37385.9 833.149  15
   0   0  -4 39151.0 888.940   2
   0   0  -4 37470.8 831.493  12
   0   0   5 89.5332 24.5683   3
   0   0  -5 16.4734 47.7092  17
   0   0  -5-25.0474 47.5751   4
   0   0  -5 52.4205 36.8877  15
   0   0  -5 70.0587 30.3925  11
   0   0  -5 72.5593 43.3102  12
   0   0  -5 83.0079 40.3859  24
   0   0  -5 37.2464 27.8114  27
   0   0  -5 114.474 53.8464   2
   0   0  -5 87.3800 52.8123  20
   0   0  -6 167374. 3319.72  17
   0   0  -6 173521. 3182.76  15
   0   0  -6 178050. 3105.54  11
   0   0  -6 178969. 3284.90   2
   0   0  -6 176220. 3332.61   4
   0   0  -6 175824. 3177.45  24
   0   0  -6 180427. 3125.79  27
   0   0  -6 173668. 3251.64  20
   0   0  -6 175106. 3188.86  12
   0   0  -7 88.1639 78.2070  20
   0   0  -7 117.354 53.6296  27
   0   0  -7 49.2041 68.5896   2
   0   0  -7 81.4774 78.9213  17
   0   0  -7 49.6457 59.5461  15
   0   0   7 84.5606 28.5070   3
   0   0  -7 178.691 94.5260   4
   0   0  -7 82.7830 47.5025  11
   0   0  -7 70.1609 57.3363  24
   0   0  -7 100.933 68.3968  12
   0   0  -8 190367. 3665.89   2
   0   0  -8 194235. 3748.21   4
   0   0  -8 188153. 3546.94  12
   0   0  -8 187103. 3546.31  15
   0   0  -8 186477. 3741.02  17
   0   0   8 192096. 3457.75  23
   0   0   8 197424. 3284.41   3
   0   0  -8 189100. 3441.35  11
   0   0  -8 187590. 3650.31  20
   0   0  -8 191385. 3461.22  27
   0   0  -8 192815. 3540.59  24
   0   0  -9 0.16797 78.9770  17
   0   0   9 36.3465 40.9539  23
   0   0  -9 66.0639 54.1976  27
   0   0  -9 47.5088 75.9498   2
   0   0  -9-3.80153 80.4414  20
   0   0  -9-2.61471 53.5394  24
   0   0  -9 6.50170 43.8903  11
   0   0   9 10.8813 24.7597   3
   0   0  -9 26.9847 61.1016  12
   0   0  -9-26.6104 70.2997  15
   0   0  -9 82.8999 93.3893   4
   0   0  10 1667.23 170.300  23
   0   0 -10 1423.30 206.267  20
   0   0 -10 1527.30 230.525   4
   0   0 -10 2133.86 194.095  27
   0   0 -10 1525.41 186.644  15
   0   0 -10 1792.92 254.352  17
   0   0 -10 1677.00 227.187   2
   0   0 -10 1947.99 183.075  11
   0   0 -10 1713.88 200.558  12
   0   0 -10 1876.56 200.457  24
   0   0  10 1559.01 173.601  21
   0   0  10 1924.95 124.864   3
   0   0 -11-10.2314 111.826  17
   0   0  11 73.7634 60.8876  23
   0   0 -11 29.6407 74.1621  15
   0   0 -11 5.54666 52.2209  11
   0   0 -11 131.357 118.381  20
   0   0 -11 88.1365 82.1091  24
   0   0  11 0.37676 72.5363  21
   0   0  11 65.4450 33.2311   3
   0   0 -11 129.744 83.5939   2
   0   0 -11-37.2594 84.2715  12
   0   0 -11 65.0914 114.362   4
   0   0 -11-1.54715 65.5091  27
   0   0  11 16.9411 83.5404  22
   0   0 -12 39517.1 1199.03  12
   0   0 -12 41782.3 1122.22  11
   0   0  12 39024.2 1147.92  21
   0   0 -12 41247.0 1406.66   4
   0   0  12 41885.7 1105.06  23
   0   0 -12 39575.5 1405.94  17
   0   0 -12 41372.8 1328.26   2
   0   0 -12 41341.7 1209.89  24
   0   0 -12 41233.6 1343.34  20
   0   0 -12 40753.1 1117.43  27
   0   0 -12 39275.8 1207.77  15
   0   0  12 39704.3 1192.51  22
   0   0  13 178.965 101.933  21
   0   0 -13 156.120 144.884  20
   0   0  13 147.804 87.4991  23
   0   0 -13 24.2596 122.302   2
   0   0 -13-66.9940 106.787  15
   0   0 -13 103.402 134.453  24
   0   0 -13 156.996 123.317   4
   0   0 -13 386.326 174.223  17
   0   0 -13 217.022 127.642  12
   0   0 -13 33.0034 74.0330  27
   0   0 -13 83.0671 80.9085  11
   0   0  13 154.965 94.0995  22
   0   0 -14 84819.2 2189.21  15
   0   0  14 86907.3 2327.44   1
   0   0 -14 95836.0 2090.69  11
   0   0  14 85118.2 2115.63  21
   0   0 -14 91330.3 2407.64  20
   0   0 -14 89484.9 2489.17   4
   0   0 -14 91701.0 2072.75  27
   0   0 -14 89705.0 2364.03   2
   0   0 -14 84350.9 2166.14  12
   0   0  14 89954.9 2187.31  22
   0   0  14 91413.6 2030.77  23
   0   0 -14 89710.3 2523.27  17
   0   0 -15 101.063 140.985  17
   0   0  15 98.0425 116.822   1
   0   0 -15 260.028 105.747  11
   0   0  15 127.823 116.810  22
   0   0 -15 152.235 131.363  15
   0   0  15 31.1301 81.5929  21
   0   0 -15 226.569 111.204  27
   0   0 -15 197.165 161.152   2
   0   0  15 103.427 76.0878  23
   0   0  15 401.867 211.107  14
   0   0 -15 223.532 172.581   4
   0   0  15 41.0390 88.0302  16
   0   0 -16 4641.39 438.153  15
   0   0  16 4417.92 501.356  14
   0   0  16 5191.27 503.882   1
   0   0  16 5649.98 453.347  21
   0   0  16 6185.92 480.254  22
   0   0 -16 6282.24 604.595   4
   0   0  16 5099.05 440.005  16
   0   0 -16 4952.08 555.074  17
   0   0 -16 5830.21 419.279  27
   0   0  17-133.322 150.480   1
   0   0 -17 87.2337 133.933  15
   0   0  17-25.5599 102.576  21
   0   0 -17-44.1852 212.083  17
   0   0  17-62.0273 206.498  14
   0   0  17 156.654 121.055  16
   0   0 -17 54.1317 153.198   4
   0   0  17-73.3509 146.175  22
   0   0  18 21589.8 1211.38  14
   0   0  18 19831.4 1082.65   1
   0   0 -18 20274.6 1195.72   4
   0   0 -18 22766.2 1292.24  17
   0   0 -18 19457.2 1004.78  15
   0   0  18 22560.3 1020.24  16
   0   0  18 20687.8 984.781  22
   0   0  19 203.590 233.434  14
   0   0  19 42.6560 144.410   1
   0   0  19 167.368 140.409  22
   0   0 -19 249.965 221.236  17
   0   0 -19 162.887 172.161   4
   0   0  19 250.378 147.134  16
   0   0 -19 165.393 153.920  15
   0   0  20 26763.6 1203.39  22
   0   0 -20 29053.9 1585.62  17
   0   0  20 24175.2 1404.46  14
   0   0  20 27269.3 1356.88   1
   0   0 -20 24278.8 1212.73  15
   0   0  20 28785.0 1246.01  16
   0   0 -20 25347.8 1438.23   4
   0   0 -21-59.4787 211.600   4
   0   0  21 18.1479 246.668  14
   0   0 -21 28.1199 159.512  15
   0   0  21-81.2254 169.743   1
   0   0 -21 95.6429 258.208  17
   0   0  22 2199.92 419.107   1
   0   0 -22 2757.73 505.734   4
   0   0  22 1558.35 427.339  14
   0   0 -22 2370.15 487.265  17
   0   0 -23 5.98627 186.946   4
   0   0  23 341.745 263.904  14
   0   0  23 158.274 225.240   1
   0   0  24 15.6295 164.048   1
   0   0  24 586.123 310.378  14
   0   0 -24 517.495 274.240   4
   0   0 -24-250.461 261.087  17
   0  -2   0 97140.5 1858.66  21
   0   2   0 98384.2 1876.48  29
   0   2   0 96367.3 1886.34   6
   0   2   0 95564.9 1820.71  13
   0  -2   0 97915.9 1847.63   3
   0   2   0 100745. 1696.49   2
   0  -2   0 92925.6 1889.27  16
   0   2   0 96697.7 1870.47  19
   0   2   0 98969.9 1823.39  25
   0   2   0 94157.5 1876.22  18
   0   2   1 235280. 4107.47  29
   0   2   1 234234. 4159.26   6
   0  -2   1 248703. 4040.48  22
   0  -2  -1 248393. 4119.84   8
   0  -2  -1 227843. 4154.82  16
   0  -2  -1 231992. 4117.53  28
   0   2  -1 248940. 4050.20  25
   0  -2   1 236625. 4154.62  16
   0  -2  -1 244111. 4150.18  12
   0   2  -1 239878. 4140.49   6
   0   2  -1 237820. 4133.64  18
   0   2   1 230129. 4135.95  18
   0   2   1 233317. 4033.44  13
   0  -2  -1 243944. 3964.88  10
   0   2  -1 230741. 4160.65  29
   0  -2  -1 242461. 4080.01   3
   0   2  -1 236001. 4141.92  19
   0  -2   1 242582. 4141.30   3
   0   2  -1 249362. 4026.80   2
   0  -2  -1 250956. 4006.17   4
   0  -2   1 241550. 4149.74  21
   0  -2  -1 244333. 4082.98  21
   0   2   1 242519. 4131.12  19
   0   2   2 36501.5 836.973  19
   0  -2  -2 37099.2 869.682  12
   0  -2  -2 38595.3 847.104   8
   0   2  -2 35023.4 886.020  29
   0  -2  -2 34697.6 670.870  10
   0  -2  -2 38594.4 752.021  17
   0   2   2 38303.8 707.168  14
   0  -2  -2 34905.0 828.144  28
   0  -2   2 37278.2 888.816  21
   0   2  -2 36009.1 825.715   2
   0  -2  -2 38670.6 743.858  20
   0   2   2 35503.5 817.095  29
   0   2   2 34989.0 862.079  18
   0   2   2 34399.1 849.973   5
   0  -2  -2 37751.0 780.167  21
   0  -2   2 36923.9 761.595  22
   0  -2  -2 37820.5 798.247   3
   0   2  -2 38283.7 747.574  17
   0  -2  -2 35617.7 821.053  24
   0  -2  -2 37785.4 823.859   4
   0  -2   2 35088.7 861.556  16
   0   2  -2 36620.2 765.737  25
   0   2  -2 35457.7 847.122   6
   0   2   2 36339.0 876.728   6
   0  -2   2 36472.3 881.293   3
   0   2  -2 35547.8 826.238  18
   0   2   2 37639.0 752.517  13
   0  -2  -3 9846.66 353.660  24
   0   2  -3 9635.11 356.272   6
   0   2   3 10143.1 270.105  13
   0   2   3 9629.58 362.874   5
   0  -2  -3 10227.5 235.296  10
   0  -2   3 10001.4 391.414  21
   0   2  -3 10077.7 397.091  29
   0   2   3 10085.4 343.504  19
   0   2  -3 9756.20 299.647  25
   0   2   3 10787.8 238.845   1
   0   2  -3 9496.11 371.792   2
   0  -2   3 8883.12 374.706   3
   0  -2  -3 10339.4 304.324  20
   0   2  -3 9539.95 323.355  18
   0  -2  -3 10105.8 364.591   8
   0  -2   3 9111.30 360.925  16
   0   2   3 8905.45 317.691  29
   0   2  -3 10815.9 288.480   4
   0   2  -3 9953.05 382.537  15
   0   2  -3 9780.30 327.727  17
   0  -2   3 9936.81 293.266  22
   0   2   3 8899.61 363.927   6
   0  -2  -3 10187.1 338.213  17
   0  -2  -3 9886.15 379.806  12
   0  -2  -3 9868.55 300.745   3
   0   2   3 9426.67 371.116  18
   0  -2  -3 9799.86 374.516   4
   0   2   4 10010.6 385.450   5
   0  -2  -4 9893.92 367.933  24
   0   2  -4 9970.24 304.773  11
   0  -2   4 9963.41 306.871  22
   0  -2  -4 9696.63 407.819   4
   0   2  -4 9682.23 368.503   6
   0   2  -4 10173.2 328.361   4
   0   2  -4 9915.38 371.179  17
   0   2   4 10356.1 330.676  29
   0   2   4 10540.2 286.823   1
   0   2  -4 9653.75 395.729  29
   0   2  -4 9727.29 391.357  15
   0  -2  -4 9730.82 396.182  12
   0  -2   4 9981.40 384.814  16
   0  -2   4 10127.1 287.817  23
   0   2  -4 9651.18 320.627  18
   0  -2   4 10371.0 410.249   3
   0  -2  -4 11011.5 289.830   3
   0   2   4 10326.4 263.172  13
   0   2   4 9436.59 339.992  19
   0   2  -4 9411.76 401.850   2
   0  -2  -4 10115.5 331.903  20
   0   2   4 9890.57 387.932  18
   0   2  -4 9603.09 387.942  27
   0  -2   4 9634.68 401.091  21
   0  -2  -4 9635.62 373.255  17
   0  -2  -4 10105.3 379.032   8
   0  -2   4 10377.0 268.083   7
   0   2  -4 10131.2 320.561  25
   0   2  -5 50555.7 1247.73   2
   0  -2  -5 49738.5 1158.48   8
   0   2  -5 52296.5 1123.05   4
   0   2  -5 50389.8 1181.15  27
   0  -2   5 52579.6 902.425  26
   0   2  -5 53884.8 948.761   9
   0  -2  -5 51496.6 1111.21  20
   0  -2   5 50626.8 1197.54   3
   0  -2  -5 49010.3 1196.99  12
   0   2  -5 51243.9 1198.90  15
   0   2   5 49051.5 1168.52  18
   0   2   5 50369.5 1047.37  29
   0   2   5 50445.6 1091.26  19
   0  -2  -5 51596.3 1159.80  24
   0  -2   5 52854.0 1002.12   7
   0  -2  -5 48941.4 1241.91   4
   0  -2   5 52000.9 999.152  23
   0  -2  -5 50067.5 1195.91  17
   0   2   5 48534.5 1164.03   5
   0  -2   5 49243.9 1162.75  16
   0  -2   5 49615.2 1044.15  22
   0   2  -5 50200.8 1187.72  17
   0  -2   5 50237.9 1214.56  21
   0  -2  -5 54219.0 950.656   3
   0   2   5 53157.7 955.385  13
   0   2  -5 51470.2 1024.90  11
   0  -2   6 96020.0 2009.73   3
   0   2   6 95182.5 1990.66  18
   0  -2  -6 104055. 2020.15   8
   0  -2   6 98144.7 1861.40  22
   0   2   6 101169. 1733.19  13
   0  -2   6 95461.6 1987.39  16
   0   2  -6 99840.7 2042.72  15
   0   2  -6 98360.8 1818.01  11
   0   2  -6 98806.4 1671.60   9
   0  -2  -6 94354.8 2111.51   4
   0   2  -6 98430.7 1972.93   4
   0  -2  -6 95796.1 2039.69  12
   0  -2  -6 97819.5 2070.40  17
   0   2   6 95879.6 1889.35  19
   0   2  -6 94393.4 2041.08  17
   0  -2  -6 96930.7 1948.73  20
   0   2  -6 96408.3 2106.99   2
   0   2   6 97892.9 1834.08  29
   0  -2   6 103585. 1697.40  26
   0  -2   6 97638.8 2048.99  21
   0   2  -6 97854.7 2010.88  27
   0  -2  -6 98734.0 1897.39   2
   0  -2  -6 96576.0 1987.87  24
   0  -2   6 101915. 1793.23  23
   0  -2  -7 128679. 2630.34  12
   0   2   7 128979. 2566.52  18
   0   2   7 129878. 2279.08  13
   0  -2  -7 134295. 2703.21  17
   0  -2   7 133035. 2641.40  21
   0   2  -7 128323. 2611.46  15
   0   2  -7 129510. 2664.31  17
   0  -2  -7 128852. 2565.71  24
   0  -2   7 129829. 2572.73   3
   0  -2   7 131011. 2431.20  22
   0  -2   7 131759. 2338.75  23
   0  -2   7 125617. 2562.02  16
   0  -2  -7 132023. 2496.64   2
   0   2  -7 131158. 2583.26  27
   0   2  -7 135093. 2378.47  11
   0  -2  -7 130926. 2586.35   8
   0  -2  -7 130628. 2747.70   4
   0   2  -7 130947. 2586.91   4
   0   2  -7 128749. 2718.91   2
   0  -2  -7 132039. 2549.91  20
   0   2   7 134346. 2381.14  29
   0   2   7 126248. 2444.82  19
   0  -2   7 135890. 2257.50  26
   0  -2   8 42660.5 825.103  26
   0   2   8 39903.1 1072.34  18
   0  -2  -8 39650.1 1220.88   4
   0  -2  -8 41242.9 1198.20  17
   0   2   8 41013.4 904.263  29
   0   2  -8 40197.3 1082.74  27
   0   2  -8 40809.6 1120.12  15
   0  -2   8 39819.5 1123.16  21
   0  -2  -8 41995.4 1002.62  27
   0  -2  -8 40555.2 1098.40   8
   0  -2   8 40752.8 1067.80   3
   0  -2  -8 39928.6 1127.57  12
   0   2  -8 40588.3 915.152  11
   0  -2   8 40010.3 972.546  22
   0  -2   8 41884.8 1095.94  16
   0   2  -8 39196.0 1165.68  17
   0  -2  -8 42333.4 1095.65  20
   0  -2  -8 40994.7 1038.36   2
   0   2  -8 39063.2 1093.86   4
   0   2   8 40794.6 832.212  13
   0  -2  -8 41765.2 1094.38  24
   0   2  -8 41277.3 1220.23   2
   0  -2   8 41299.1 888.985  23
   0   2   8 39187.8 973.526  19
   0  -2  -9 8843.54 452.164  24
   0   2   9 8651.30 437.099  18
   0  -2   9 9120.81 479.086  21
   0  -2  -9 9411.80 556.484   4
   0  -2   9 8967.25 329.740  23
   0  -2   9 8857.10 425.536   3
   0  -2   9 9259.97 296.846  26
   0   2   9 9126.99 336.796  29
   0  -2  -9 9225.43 467.274   8
   0  -2   9 8311.91 437.290  16
   0   2   9 8566.98 380.636  19
   0  -2  -9 8726.79 393.680  27
   0  -2  -9 9376.78 442.616   2
   0   2  -9 9725.49 360.427  11
   0  -2  -9 9539.53 495.190  12
   0   2  -9 9001.47 530.392   2
   0   2  -9 8928.60 476.357   4
   0   2  -9 8746.01 441.637  27
   0   2  -9 9120.95 480.650  15
   0   2  -9 9256.82 522.229  17
   0  -2  -9 8960.93 460.879  20
   0  -2   9 9161.56 394.710  22
   0  -2  -9 9020.75 524.004  17
   0   2   9 8332.23 415.365   1
   0  -2  10 2260.75 235.529  16
   0   2  10 2811.54 176.772  29
   0   2 -10 2232.52 245.597  15
   0   2 -10 2767.14 192.283  11
   0   2  10 2694.15 243.428   1
   0   2 -10 2479.03 239.712  27
   0  -2 -10 2435.43 267.002  12
   0  -2  10 2684.20 179.489  23
   0   2 -10 2730.18 296.224  17
   0  -2 -10 2338.54 244.078  24
   0  -2 -10 2706.52 263.074   8
   0  -2 -10 2664.07 219.360  27
   0  -2  10 2354.28 203.779  22
   0  -2  10 2804.32 161.418  26
   0  -2 -10 2677.55 304.269  17
   0   2  10 2556.68 208.054  19
   0  -2 -10 2861.48 324.549   4
   0  -2 -10 2506.73 259.724  20
   0  -2  10 2265.46 213.651   3
   0  -2  10 2659.56 269.313  21
   0   2 -10 3099.59 292.967   4
   0   2 -10 2816.98 320.080   2
   0   2  10 2710.34 248.537  18
   0  -2  11 2996.27 198.385  23
   0   2 -11 3253.82 356.639   2
   0  -2 -11 2758.13 290.850  20
   0  -2  11 2764.56 271.602  16
   0   2 -11 2516.83 278.149  15
   0   2  11 2992.20 270.030   1
   0  -2 -11 2908.54 288.048   8
   0   2 -11 2942.53 312.650   4
   0   2  11 2777.53 260.918  18
   0  -2 -11 3513.59 308.516  24
   0   2  11 3335.31 199.745  29
   0   2  11 2849.39 231.887  19
   0  -2  11 2958.59 178.978  26
   0   2 -11 3345.39 286.477  27
   0  -2 -11 2508.13 282.916  12
   0   2 -11 2876.57 325.102  17
   0   2 -11 3020.89 213.616  11
   0  -2 -11 3262.60 255.042  27
   0  -2  11 3414.30 318.722  21
   0  -2  11 2534.46 227.561  22
   0  -2 -11 2670.15 322.476  17
   0  -2  11 3754.78 273.581   3
   0  -2 -11 3156.44 368.400   4
   0   2  12 31609.6 766.496  29
   0  -2 -12 29792.5 901.008  27
   0  -2 -12 27509.0 993.175  24
   0  -2  12 29539.3 897.074   3
   0  -2 -12 28956.0 1193.26   4
   0   2 -12 27307.1 1021.10  15
   0  -2 -12 29207.5 1165.38  17
   0   2 -12 29222.6 1155.81   2
   0   2  12 28121.8 961.301  18
   0  -2  12 30053.5 787.522  23
   0  -2 -12 27950.4 1017.72   8
   0   2  12 27874.0 967.409   1
   0  -2  12 28466.3 1000.47  16
   0  -2  12 28686.8 901.143  22
   0  -2  12 28743.8 1035.05  21
   0  -2 -12 30604.0 1082.36  20
   0   2 -12 27575.7 1058.96   4
   0   2 -12 28127.9 962.394  27
   0   2 -12 27673.7 1132.55  17
   0   2 -12 29039.3 817.206  11
   0  -2 -12 28628.2 1050.11  12
   0   2  12 28659.3 873.755  19
   0   2  12 28194.6 1077.56  14
   0   2  13 49275.7 1421.96  18
   0   2 -13 49500.6 1568.46   4
   0   2 -13 52689.3 1700.62  17
   0   2 -13 48806.2 1510.41  15
   0  -2  13 51182.0 1359.90  22
   0  -2  13 51741.0 1529.09  21
   0  -2 -13 50902.6 1733.98   4
   0  -2  13 49952.9 1467.25  16
   0  -2  13 51638.9 1314.85   3
   0  -2 -13 52098.6 1581.59  20
   0   2 -13 52437.2 1694.86   2
   0   2 -13 51555.1 1438.02  27
   0   2  13 50704.3 1459.05   1
   0  -2 -13 52848.9 1509.55  24
   0  -2 -13 53633.8 1355.15  27
   0  -2 -13 47734.5 1508.17  12
   0   2  13 48743.3 1295.42  19
   0   2 -13 55075.6 1272.11  11
   0  -2 -13 49311.7 1678.26  17
   0   2  13 48506.5 1573.86  14
   0   2 -14 22577.9 1092.86  17
   0   2  14 22298.7 1028.13  14
   0  -2 -14 22606.6 1114.37  17
   0   2  14 23939.4 823.020  19
   0  -2  14 21743.9 953.974  21
   0   2  14 23304.5 939.732  23
   0  -2  14 23778.4 955.703  16
   0   2 -14 24768.2 1139.24   2
   0  -2 -14 22908.9 1144.53   4
   0  -2 -14 25064.8 854.408  27
   0  -2 -14 23537.7 1029.86  20
   0  -2 -14 23083.5 967.310  24
   0  -2 -14 22649.8 984.593  12
   0   2 -14 22381.3 983.219  15
   0  -2  14 23700.6 861.632  22
   0   2 -14 23640.7 914.115  27
   0   2 -14 23267.6 1044.50   4
   0   2  14 22955.3 929.222   1
   0   2  14 24230.8 922.636  18
   0   2 -15 26043.4 1223.05  17
   0  -2 -15 26395.5 1143.60  20
   0  -2  15 25427.1 1074.09  21
   0  -2 -15 25679.1 1094.21  12
   0  -2  15 25812.3 1037.20  16
   0   2  15 26237.3 898.576  19
   0  -2 -15 25505.1 1238.49  17
   0  -2 -15 27580.7 1297.73   4
   0   2 -15 28102.9 1253.15   2
   0   2  15 27127.3 1048.17  23
   0   2  15 27553.2 1023.36  18
   0   2  15 25195.6 1022.77   1
   0   2 -15 26626.8 1004.17  27
   0   2 -15 25250.2 1137.21   4
   0  -2  15 23502.7 1158.84   1
   0  -2  15 27307.1 963.831  22
   0  -2  15 24849.1 1206.19  14
   0   2 -15 23813.7 1051.05  15
   0   2  15 24531.6 1134.19  14
   0  -2 -15 25854.8 1057.94  24
   0  -2  16 4687.00 456.402  21
   0  -2 -16 5095.45 510.288  20
   0  -2 -16 3862.35 497.941  17
   0   2  16 4586.71 496.964  14
   0  -2  16 4359.14 514.411  14
   0   2 -16 4375.05 391.351  27
   0  -2 -16 4039.18 509.801   4
   0   2  16 5017.83 483.799  22
   0   2  16 4793.81 430.503  23
   0   2 -16 4870.43 531.246   2
   0   2 -16 3955.00 489.656  17
   0  -2  16 5071.13 450.463  16
   0   2 -16 3914.15 430.368  15
   0  -2  16 4627.95 387.201  22
   0   2  16 4894.15 417.104  18
   0   2  16 4627.49 432.256   1
   0   2 -16 4791.50 496.296   4
   0  -2  16 4328.84 501.594   1
   0  -2 -16 4177.90 428.198  24
   0  -2 -16 4546.32 459.607  12
   0  -2 -17 4243.53 446.026  24
   0  -2  17 3635.92 495.376  14
   0   2 -17 3765.91 429.852  15
   0   2 -17 4329.60 402.727  27
   0  -2  17 3955.35 371.554  22
   0   2 -17 4627.34 547.836  17
   0   2  17 3873.82 444.870  22
   0   2  17 3676.38 466.690  14
   0   2  17 4421.76 437.749   1
   0  -2 -17 4084.73 546.213   4
   0  -2 -17 4275.20 544.380  17
   0  -2  17 3657.11 470.733   1
   0  -2  17 3989.47 439.140  21
   0  -2 -17 4671.31 502.432  20
   0  -2 -17 4378.47 460.378  12
   0  -2  17 4338.58 437.589  16
   0   2 -17 3714.91 457.620   4
   0   2  17 4309.09 413.271  23
   0   2 -18 177.571 184.423  17
   0  -2  18-145.584 179.913  14
   0  -2 -18 31.3234 134.144  24
   0  -2 -18 337.987 211.335   4
   0  -2  18 107.819 129.149  21
   0   2  18 136.601 122.382   1
   0  -2 -18 72.7013 158.293  17
   0   2  18-107.411 198.330  14
   0   2  18 296.754 166.264  22
   0  -2  18-170.541 211.821   1
   0  -2  18 96.4003 141.504  16
   0   2 -18 215.487 159.890   4
   0  -2 -18 145.820 154.701  12
   0   2 -18 166.446 135.326  15
   0   2  18 72.0582 101.094  23
   0  -2 -19 4467.58 596.415   4
   0   2 -19 3557.98 450.101  15
   0  -2 -19 3806.82 552.396  17
   0   2 -19 2979.37 473.857  17
   0   2 -19 4281.40 528.001   4
   0  -2 -19 3908.15 458.038  24
   0  -2  19 4044.63 472.107  21
   0  -2  19 3774.86 535.466  14
   0  -2  19 4130.01 455.725  16
   0   2  19 3704.84 501.173  14
   0   2  19 2934.59 415.487  22
   0  -2 -19 4118.10 488.551  12
   0   2  19 3754.08 433.058   1
   0  -2  19 3699.65 525.624   1
   0  -2 -20 9279.41 885.541  17
   0   2  20 10128.6 865.663  14
   0  -2  20 10846.6 896.163   1
   0  -2  20 11025.3 770.549  16
   0   2 -20 9291.29 758.888  15
   0  -2 -20 10754.1 948.749   4
   0  -2  20 9499.17 893.412  14
   0   2  20 10182.9 787.458  22
   0   2  20 11345.0 779.038   1
   0   2 -20 10456.7 851.692   4
   0  -2 -20 10205.0 780.789  12
   0   2 -20 10889.1 938.692  17
   0  -2  20 11144.3 816.351  21
   0  -2 -21 10181.2 958.086  17
   0   2 -21 9569.19 830.639   4
   0  -2  21 9655.32 871.868   1
   0   2 -21 8320.65 739.977  15
   0   2 -21 9283.93 890.315  17
   0  -2  21 8148.87 851.538  14
   0   2  21 7741.14 777.788  14
   0  -2 -21 9205.70 910.221   4
   0   2  21 9269.76 764.851  22
   0  -2 -22 305.448 198.738   4
   0   2  22 933.443 310.223  14
   0  -2  22 208.295 227.327  14
   0   2 -22 380.765 203.184   4
   0  -2  22 788.663 285.050   1
   0  -2 -22 351.018 205.272  17
   0   2 -22 1303.68 361.397  17
   0   2  22 457.271 215.593  22
   0   2 -22 656.903 262.509  15
   0   2  23 659.015 291.871   5
   0   2  23 243.906 187.854  22
   0  -2 -23 558.200 321.686   4
   0   2  23 374.097 237.157  14
   0   2 -23 400.896 199.072   4
   0  -2 -23 643.805 296.876  17
   0  -2  23 923.179 371.635  14
   0   2 -23 575.047 313.276  17
   0  -2  23 434.915 248.219   1
   0   2 -23 432.639 246.655  15
   0  -2  24-5.82180 142.067   1
   0   2 -24 512.769 253.192  15
   0   2  24 46.7590 189.831  14
   0   2  24 124.129 163.506   5
   0  -4   0 20419.5 713.361   3
   0   4   0 19908.9 676.037  25
   0   4   0 19987.5 736.363  29
   0   4   0 21368.4 523.844   2
   0  -4   0 20022.3 769.357  16
   0   4   0 20134.8 734.222  19
   0   4   0 19059.0 728.173  18
   0  -4   0 19772.1 710.717  21
   0   4   0 21168.4 763.249   6
   0  -4  -1 151085. 3199.98  16
   0   4   1 152189. 3115.86  29
   0  -4   1 156822. 3131.50   3
   0   4  -1 158501. 3160.74   6
   0   4   1 163957. 2715.48   2
   0   4  -1 157935. 3016.43  25
   0   4  -1 161323. 2876.90   2
   0   4  -1 154252. 3144.88  19
   0  -4   1 151007. 3123.90  21
   0  -4   1 166709. 2711.14  14
   0   4  -1 156694. 3159.92  18
   0  -4   1 151231. 3183.58  16
   0   4  -1 154773. 3167.58  29
   0   4   1 154110. 3129.20  19
   0  -4  -1 154540. 3099.18   8
   0   4   1 158017. 3186.47   6
   0  -4  -1 165605. 2904.44  10
   0   4   1 147379. 2992.34  13
   0   4   1 154452. 3163.02  18
   0   4   1 162056. 3103.26  25
   0  -4  -1 159330. 3075.89  21
   0  -4  -1 166771. 2715.07   1
   0  -4  -1 153328. 3148.66  12
   0  -4  -1 160391. 3092.38   3
   0  -4  -2 406.539 101.267   3
   0   4   2 117.167 70.5719  19
   0  -4  -2 241.626 36.1981  17
   0   4  -2 248.217 72.9765   2
   0  -4  -2 327.429 71.4125   4
   0   4   2 209.952 102.527   6
   0   4  -2 297.821 99.5845  18
   0   4  -2 668.499 131.592   6
   0   4  -2 266.086 37.6746  17
   0  -4   2 241.626 101.576   3
   0   4   2 216.571 88.8723  29
   0  -4  -2 430.709 93.2931  21
   0  -4   2 220.218 105.431  21
   0   4  -2 380.864 90.4914  25
   0  -4   2 223.462 101.195  16
   0  -4  -2 203.773 86.7360  28
   0   4   2 391.904 126.880  18
   0   4   2 568.979 124.759  25
   0   4   2 205.869 72.0286  13
   0  -4  -2 254.217 103.462  24
   0  -4  -2 285.646 68.2772  20
   0   4  -2 259.238 104.289  29
   0  -4  -2 563.310 77.4478  10
   0  -4  -2 769.380 144.220   8
   0  -4  -2 1120.35 168.850  12
   0   4  -3 33945.9 1085.53  29
   0  -4  -3 37053.1 928.374   4
   0  -4  -3 36002.3 1026.97  28
   0  -4  -3 36701.1 1024.24   8
   0   4  -3 35512.2 953.985   2
   0  -4   3 34211.0 1056.85  21
   0   4   3 34482.7 1000.36  29
   0   4   3 36893.3 1094.68  18
   0  -4  -3 35656.3 1070.24  12
   0  -4  -3 35685.7 963.439   3
   0   4  -3 35479.0 913.185  25
   0  -4  -3 36286.2 842.268  20
   0  -4  -3 37683.7 768.266  10
   0   4  -3 35797.3 1032.07  18
   0   4  -3 36117.1 1052.56   6
   0   4  -3 36798.4 780.037  17
   0  -4  -3 37852.7 791.270  17
   0  -4  -3 34540.3 990.041  24
   0  -4   3 34611.1 1070.69  16
   0  -4   3 35215.4 1073.12   3
   0   4   3 34394.6 894.229  13
   0  -4  -3 37052.0 951.316  21
   0   4   3 35073.4 1072.70   6
   0   4   3 34208.7 1008.93  19
   0   4   4 499.166 86.3865  13
   0  -4  -4 385.978 95.9145  24
   0   4  -4 676.979 102.494  25
   0  -4  -4 573.422 111.254   4
   0   4   4 568.571 124.193  19
   0  -4  -4 522.615 125.746   8
   0   4  -4 530.478 44.3377   4
   0   4   4 394.285 112.945   6
   0  -4   4 544.708 90.9926  22
   0  -4  -4 660.972 133.736  12
   0   4   4 484.035 103.663  29
   0   4  -4 525.379 111.621   2
   0  -4  -4 720.329 91.3731  17
   0  -4  -4 552.290 100.222  21
   0  -4   4 450.231 123.859   3
   0   4  -4 365.533 97.2861  18
   0  -4  -4 481.777 52.3420  10
   0   4  -4 526.626 133.069  29
   0  -4   4 613.287 135.786  16
   0  -4  -4 602.373 90.8263  20
   0  -4  -4 545.704 119.842  28
   0   4  -4 560.114 82.5969  17
   0   4  -4 553.689 122.401   6
   0   4  -4 572.876 131.263  15
   0  -4  -4 528.385 95.6960   3
   0   4   4 796.523 80.1603  14
   0   4   4 368.428 116.131  18
   0   4   4 442.658 128.407   5
   0   4  -5 118114. 2482.94   2
   0   4   5 116274. 2419.16  19
   0   4  -5 115218. 2271.76  17
   0  -4   5 114620. 2549.27  21
   0  -4   5 115550. 2522.72  16
   0  -4  -5 115043. 2444.68   8
   0   4  -5 121344. 2284.09  25
   0   4   5 114975. 2202.37  13
   0  -4  -5 121212. 2252.64  20
   0   4   5 113855. 2388.70  29
   0   4  -5 115848. 2467.43   6
   0   4  -5 119598. 2552.07  15
   0  -4  -5 116060. 2427.35  24
   0  -4  -5 120392. 2554.77  12
   0  -4  -5 117451. 2294.46   3
   0   4   5 114526. 2528.30  18
   0  -4   5 119250. 2258.24  22
   0  -4  -5 117265. 2293.78  17
   0   4  -5 118016. 2389.85  18
   0  -4   5 116241. 2555.71   3
   0   4  -5 120945. 2089.31   4
   0   4   5 120898. 2199.79  14
   0   4  -5 118083. 2586.35  29
   0   4   5 115586. 2530.60   6
   0  -4  -5 117459. 2437.37   4
   0   4   5 116182. 2499.39   5
   0  -4  -6 1900.15 218.441   8
   0   4  -6 2135.97 148.030   4
   0   4   6 1496.67 211.306  18
   0  -4   6 2509.90 270.498  21
   0  -4  -6 1957.86 171.481  20
   0  -4  -6 1766.77 213.333   4
   0   4   6 1946.97 166.013  14
   0   4  -6 1770.15 165.769  25
   0   4  -6 1791.14 181.765  17
   0  -4   6 1962.68 238.192  16
   0   4   6 1913.28 200.841  19
   0  -4  -6 1744.86 225.904  12
   0  -4  -6 1917.34 158.635   3
   0   4   6 2565.17 220.161  29
   0   4   6 1898.97 232.300   5
   0  -4   6 1845.06 161.362  22
   0   4  -6 1777.63 182.113  18
   0  -4   6 1805.13 231.901   3
   0   4  -6 1709.29 212.582  15
   0  -4  -6 1646.29 177.927  17
   0   4   6 2115.05 149.496  13
   0  -4  -6 1677.17 201.242  24
   0   4   6 1964.05 89.9871   1
   0   4   6 1583.34 211.080   6
   0   4  -6 2131.22 237.655   2
   0   4  -6 1934.76 215.085   6
   0   4  -6 2029.62 238.397  27
   0   4  -7 98238.5 2150.03  17
   0  -4  -7 102111. 2249.62   8
   0   4   7 99772.5 2312.10  18
   0  -4  -7 102677. 2070.63  20
   0   4  -7 103674. 2063.99  25
   0   4   7 103716. 2293.76   5
   0   4  -7 103773. 1946.95   9
   0   4  -7 101871. 2333.23  15
   0   4   7 100685. 2170.92  19
   0   4   7 100183. 2065.76  14
   0   4  -7 100412. 2310.44  27
   0   4  -7 104476. 1990.50   4
   0   4   7 100580. 1883.81  13
   0   4   7 98096.6 2299.29   6
   0  -4   7 100447. 2332.09   3
   0  -4  -7 108651. 1952.98   3
   0  -4   7 101668. 2014.64  22
   0  -4  -7 104205. 2190.59  17
   0   4  -7 99768.0 2331.62   2
   0   4   7 101810. 1824.85   1
   0   4  -7 98600.1 2079.29  18
   0  -4  -7 100565. 2337.99  12
   0   4  -7 102607. 2022.49  11
   0  -4  -7 98447.7 2211.01  24
   0  -4  -7 100191. 2308.53   4
   0  -4   7 101917. 2353.52  21
   0  -4   7 102006. 2301.78  16
   0   4   7 97660.6 2112.26  29
   0  -4  -8 16263.4 742.304   4
   0   4   8 14734.3 607.234  19
   0  -4   8 15216.0 709.440   3
   0  -4   8 15627.0 538.270  22
   0   4   8 16489.8 438.933  13
   0  -4  -8 15074.5 716.482  12
   0   4   8 16420.1 457.800   1
   0   4  -8 15401.9 645.530  17
   0   4  -8 16038.0 730.543  15
   0   4   8 14813.3 692.444   6
   0  -4  -8 16267.2 597.985  20
   0  -4  -8 16334.5 440.956   3
   0   4   8 15328.1 590.298  14
   0   4  -8 15637.8 711.190  27
   0  -4  -8 14896.6 651.963  24
   0   4  -8 15946.7 555.410   4
   0   4  -8 15769.6 527.859  11
   0  -4   8 15438.7 729.588  21
   0  -4  -8 16777.0 682.933  17
   0   4   8 14972.3 683.333   5
   0   4  -8 14682.4 717.000   2
   0  -4   8 15616.0 698.631  16
   0   4   8 15161.4 703.475  18
   0  -4  -8 15940.3 680.188   8
   0   4   8 15693.2 586.394  29
   0   4  -8 16967.6 458.655   9
   0  -4   9 17645.4 584.171  22
   0   4  -9 16310.1 742.398  27
   0  -4  -9 15700.7 696.112  24
   0  -4   9 17563.4 760.542  16
   0   4   9 16493.5 507.090   1
   0  -4  -9 15571.6 705.404   8
   0   4  -9 16556.5 765.114  15
   0   4   9 16071.5 649.474  14
   0   4   9 16830.7 434.772  13
   0   4  -9 17455.4 722.911  17
   0   4  -9 16508.6 793.974   2
   0   4   9 16172.2 646.176  19
   0   4   9 16756.1 740.873   5
   0  -4  -9 15899.2 758.400  12
   0  -4   9 15545.8 756.323  21
   0  -4  -9 17018.9 735.190  17
   0   4  -9 17694.5 625.169   4
   0  -4   9 15544.9 729.540   3
   0  -4  -9 16649.2 642.995  20
   0   4   9 16188.7 741.256  18
   0   4   9 16867.2 609.709  29
   0   4   9 16006.5 736.781   6
   0  -4  -9 17104.0 801.356   4
   0   4  -9 16805.3 550.999  11
   0   4 -10 246.359 73.1449  11
   0   4  10 319.413 138.966   5
   0  -4  10 115.403 96.0700  16
   0   4  10 295.382 106.415  19
   0   4  10 362.351 100.105  29
   0  -4  10 219.339 92.2271   3
   0  -4 -10 280.408 131.077  24
   0  -4 -10 107.500 124.567  12
   0   4  10 354.763 138.667  18
   0   4 -10 359.527 128.381  27
   0  -4 -10 203.686 128.920   4
   0  -4  10 432.105 157.133  21
   0   4  10 164.744 113.954   6
   0  -4 -10 240.973 87.3147  20
   0   4  10 174.459 93.1302  14
   0  -4 -10 98.7127 109.315   8
   0   4 -10 514.784 160.796  15
   0   4 -10 326.054 126.876  17
   0  -4 -10 272.324 134.342  17
   0  -4  10 236.529 75.8204  22
   0   4 -10 157.388 80.6013   4
   0   4 -10 339.877 153.479   2
   0   4  10 285.827 76.3665   1
   0  -4 -11 13857.4 707.767   8
   0   4 -11 14948.2 822.255   2
   0   4 -11 15929.8 663.441   4
   0   4 -11 15260.5 751.813  17
   0   4  11 14239.5 621.810  19
   0   4  11 14932.4 745.357  18
   0  -4  11 14728.6 733.809  16
   0   4  11 14234.2 538.171   1
   0   4 -11 14645.5 764.410  15
   0   4  11 16115.4 766.250   5
   0   4 -11 14994.6 737.616  27
   0   4 -11 16061.7 545.856  11
   0   4  11 14319.9 733.271   6
   0  -4 -11 14984.6 821.905   4
   0   4  11 13927.8 669.227  14
   0   4  11 15380.6 587.415  29
   0  -4  11 14394.3 765.702  21
   0  -4  11 13744.9 703.411   3
   0  -4  11 15232.7 577.625  22
   0  -4 -11 15159.4 763.075  17
   0  -4 -11 12508.9 722.942  12
   0  -4 -11 14662.2 668.103  20
   0  -4 -11 14324.8 701.091  24
   0  -4  12 4096.78 412.131  21
   0   4  12 4390.94 406.441   6
   0  -4 -12 3958.45 439.013   4
   0   4  12 4137.94 328.679  19
   0   4  12 3487.58 367.438   5
   0   4  12 4198.34 372.879  14
   0  -4 -12 3743.59 377.168   8
   0   4 -12 3875.52 378.521  27
   0  -4 -12 3233.63 379.356  12
   0   4 -12 4369.92 416.514  17
   0   4 -12 4433.02 358.045   4
   0  -4 -12 3380.64 352.276  24
   0  -4  12 3823.02 286.408  22
   0   4 -12 4071.07 449.077   2
   0  -4  12 3446.30 363.265  16
   0  -4  12 4053.44 373.408   3
   0   4  12 4295.00 398.888  18
   0  -4 -12 3668.35 346.503  20
   0  -4 -12 3568.76 391.328  17
   0   4 -12 3778.44 401.406  15
   0   4  13 44943.5 1484.55  18
   0  -4 -13 44605.8 1552.34  17
   0   4 -13 41935.1 1493.78  15
   0  -4  13 45848.6 1447.20   3
   0   4 -13 46428.7 1552.73  17
   0   4  13 46888.4 1313.29  19
   0  -4 -13 42744.0 1527.78  12
   0   4 -13 45841.3 1656.17   2
   0  -4  13 44591.5 1544.43  21
   0   4  13 45085.6 1488.63   6
   0   4  13 42501.3 1469.90   5
   0  -4  13 48502.1 1252.38  22
   0  -4 -13 47774.2 1458.01  20
   0  -4 -13 43590.2 1630.83   4
   0  -4  13 43827.6 1470.53  16
   0   4 -13 45259.4 1383.90   4
   0  -4 -13 43106.6 1465.04   8
   0   4  13 43901.5 1430.50  14
   0  -4 -13 45585.4 1465.97  24
   0   4 -13 46462.0 1482.44  27
   0  -4 -14 3587.83 377.379  20
   0   4  14 3390.24 390.327   6
   0  -4 -14 3008.26 370.346   8
   0   4 -14 3271.56 436.724   2
   0  -4 -14 4082.75 481.042   4
   0   4 -14 3892.09 400.312  27
   0   4  14 3349.48 371.028  14
   0  -4 -14 3085.84 393.166  17
   0  -4  14 3188.63 399.097  21
   0   4 -14 3840.13 436.266  15
   0   4 -14 3713.56 433.185  17
   0  -4  14 3523.05 357.953   3
   0   4  14 3960.64 411.342  18
   0  -4 -14 3431.45 384.397  24
   0  -4  14 3041.84 366.635  16
   0   4 -14 3049.81 334.762   4
   0   4  14 3226.13 383.014   5
   0  -4  14 2960.30 400.411  14
   0  -4 -14 2953.14 380.619  12
   0   4  15 13795.8 801.169   6
   0  -4 -15 13245.6 902.118   4
   0  -4 -15 13661.8 867.952  17
   0   4  15 12878.5 768.809  14
   0   4  15 12919.2 783.811   5
   0   4 -15 12466.5 799.460  15
   0  -4  15 13039.6 887.707   1
   0   4 -15 13050.8 760.012  27
   0  -4 -15 13584.7 775.601  20
   0   4 -15 12449.1 866.754   2
   0  -4 -15 13485.0 781.499  24
   0  -4 -15 11939.1 788.663  12
   0  -4  15 13623.7 887.915  14
   0  -4  15 14053.5 738.534   3
   0  -4  15 12715.2 811.055  21
   0  -4  15 12821.6 772.349  16
   0   4  15 14035.9 792.746  18
   0  -4 -15 11983.1 752.813   8
   0   4 -15 12643.7 821.067  17
   0   4 -15 14312.8 764.178   4
   0  -4 -16 1214.14 267.614   8
   0  -4 -16 1344.87 328.088   4
   0  -4  16 1116.98 240.564  16
   0   4  16 1564.14 277.099  18
   0   4 -16 1352.06 304.426  17
   0   4  16 1139.37 273.301   5
   0  -4 -16 1314.41 267.535  24
   0   4 -16 1040.41 286.296   2
   0  -4 -16 981.042 249.685  12
   0  -4 -16 1065.88 278.649  17
   0  -4 -16 1412.10 273.812  20
   0   4 -16 1169.27 232.598   4
   0   4  16 1145.53 262.557  14
   0   4 -16 1053.62 232.007  27
   0   4 -16 1426.83 304.679  15
   0  -4  16 868.403 236.530  21
   0  -4  16 982.431 277.557  14
   0   4  16 1109.14 243.262   6
   0  -4  16 876.622 249.086   1
   0  -4  17 1380.31 352.024   1
   0   4  17 951.227 243.657  14
   0   4  17 1398.62 272.692  18
   0  -4 -17 1415.36 285.410  24
   0  -4 -17 1237.12 342.664   4
   0   4 -17 917.074 260.487   2
   0  -4  17 929.010 239.289  16
   0  -4 -17 926.983 279.634  17
   0  -4 -17 1189.77 252.212  20
   0   4 -17 871.291 253.177  15
   0   4 -17 952.291 256.936  17
   0  -4 -17 1101.48 285.521  12
   0   4  17 753.814 231.235   5
   0  -4  17 1020.87 259.773  21
   0  -4  17 973.685 284.912  14
   0   4 -17 1763.55 297.183  27
   0   4  17 1242.60 274.064   6
   0   4  17 947.200 243.827  23
   0  -4  18 107.124 148.668  21
   0  -4 -18-41.5660 226.281  17
   0  -4 -18-175.772 186.593   4
   0  -4  18-182.540 235.822  14
   0   4  18-468.573 200.200  14
   0   4  18 87.6952 151.254   5
   0   4 -18-90.0412 165.126  17
   0  -4  18 36.6931 166.197   1
   0   4 -18-163.314 187.013  15
   0  -4 -18-122.278 147.010  12
   0   4  18 22.4126 142.616   6
   0  -4 -18 174.017 187.835  24
   0   4  18 103.764 156.229  23
   0   4 -18-2.24907 143.216  27
   0  -4  18 55.7030 164.052  16
   0  -4  19 10150.9 765.553  16
   0   4  19 9322.69 801.226  22
   0   4  19 9466.07 740.329  23
   0   4  19 10138.9 768.822   6
   0   4  19 8304.48 717.361   5
   0  -4  19 9252.96 844.807   1
   0  -4  19 9348.81 778.897  21
   0   4  19 9704.64 771.437  14
   0  -4  19 7336.21 767.305  14
   0  -4 -19 10031.0 861.789  17
   0  -4 -19 8256.16 732.664  12
   0   4 -19 9045.82 808.192  17
   0  -4 -19 9690.15 889.843   4
   0   4 -19 8494.57 742.583  15
   0  -4 -19 8048.49 682.231  24
   0  -4  20 444.090 303.570   1
   0   4  20 311.145 197.636   5
   0  -4 -20 309.349 186.054  24
   0  -4  20 463.761 217.342  14
   0   4  20 357.673 183.934  23
   0  -4 -20 216.327 190.306  12
   0  -4 -20 259.812 236.580  17
   0   4  20 104.449 139.922  14
   0  -4 -20 40.8260 215.714   4
   0   4 -20 295.840 191.431  15
   0  -4  20 116.188 138.444  16
   0   4  20 291.519 184.713   6
   0   4  20 566.205 221.221  22
   0  -4  20 165.606 176.682  21
   0   4 -20 319.319 222.153  17
   0  -4 -21 7383.51 694.272  24
   0   4 -21 5929.15 703.240  17
   0  -4  21 6279.04 751.710   1
   0  -4 -21 5786.81 707.784  17
   0   4  21 6162.19 691.701  22
   0  -4 -21 6669.44 695.004  12
   0   4 -21 6677.10 699.970  15
   0   4  21 6460.11 680.922  14
   0  -4  21 6328.45 761.340  14
   0  -4  21 6503.49 693.475  21
   0  -4 -21 6556.86 778.108   4
   0   4  21 6827.39 688.602   5
   0   4  22 255.095 212.478  14
   0  -4 -22 846.400 271.926  24
   0  -4 -22 739.498 255.608  12
   0  -4 -22 705.106 300.007   4
   0   4 -22 722.483 269.774  15
   0  -4  22 974.594 374.910  14
   0   4  22 743.824 305.852  22
   0   4 -22 478.239 228.168  17
   0   4  22 847.744 283.045   5
   0  -4 -22 965.960 335.308  17
   0  -4  22 659.439 276.038   1
   0   4  23 17.3770 175.104  22
   0  -4 -23 41.3721 194.354  17
   0   4  23 761.265 306.311   5
   0   4 -23 440.769 264.997  15
   0  -4 -23 96.6543 213.709   4
   0   4 -23 130.063 218.644  17
   0  -4  23 151.590 223.517  14
   0  -4 -23-197.461 176.700  12
   0  -4  23-348.791 255.768   1
   0   4  23 117.431 175.050  14
   0   6   0 141542. 3184.11  29
   0  -6   0 142183. 3104.63  21
   0   6   0 146141. 2660.60   2
   0  -6   0 152050. 2676.35   1
   0   6   0 144904. 3242.61   6
   0  -6   0 144380. 3283.24  16
   0   6   0 140739. 3181.56  19
   0   6   0 147496. 3063.44  25
   0  -6   0 145860. 2909.68  10
   0  -6   0 142995. 3131.65   3
   0   6   0 144743. 3202.59  18
   0  -6  -1 233.210 44.9270   1
   0  -6   1 117.992 115.216   3
   0  -6  -1 177.562 137.447  12
   0   6  -1 45.3137 106.150   6
   0  -6  -1 23.1572 81.9150   3
   0  -6   1 272.660 70.6119   1
   0   6   1 65.5753 105.025  25
   0   6   1 47.8966 109.737  18
   0   6   1 188.232 139.536   6
   0  -6  -1 265.670 91.4487  10
   0  -6   1 110.796 115.910  21
   0  -6  -1-22.0640 118.479  16
   0  -6  -1 141.016 130.857   8
   0   6  -1 207.248 99.6366  25
   0  -6   1 243.721 111.562  16
   0   6   1-35.1318 117.898  29
   0   6   1 647.070 172.233  19
   0  -6  -1 328.490 141.488  28
   0  -6  -1 4.63629 102.002  21
   0   6  -1 222.268 65.5008   2
   0   6  -1 3.47010 109.761  29
   0  -6  -2 48291.7 1478.33  28
   0   6  -2 47763.1 1490.80   6
   0   6   2 49094.6 1468.31  29
   0   6  -2 48447.0 1211.98   2
   0  -6  -2 46805.0 1403.24  24
   0   6   2 47844.3 1462.74  19
   0   6  -2 48844.3 1524.06  29
   0  -6  -2 48361.6 1390.12  21
   0  -6  -2 50723.4 1213.02  20
   0  -6  -2 49964.2 1421.81   3
   0   6  -2 52506.7 1526.80  18
   0  -6   2 50225.4 1510.91   3
   0   6  -2 50576.8 1349.28  25
   0  -6  -2 52769.2 1200.79  10
   0  -6  -2 50943.4 1517.21  12
   0  -6   2 49703.5 1560.05  16
   0   6   2 49793.7 1541.23   6
   0  -6  -2 50166.8 1450.06   8
   0  -6   2 49460.3 1215.61   1
   0  -6   2 48416.7 981.411  14
   0  -6   2 47880.2 1468.65  21
   0   6   2 50213.1 1538.93  18
   0   6   2 50359.3 1452.80  25
   0  -6  -3 1330.12 219.072  28
   0  -6  -3 1741.75 259.929  12
   0   6   3 1400.63 221.798  29
   0  -6  -3 1601.93 216.082  21
   0  -6   3 1039.92 204.673   3
   0  -6  -3 1174.24 201.409   8
   0   6  -3 1632.83 243.163  18
   0  -6   3 1214.88 222.927  16
   0  -6  -3 1324.12 217.995  24
   0  -6   3 1713.36 139.519  14
   0   6   3 1418.64 223.206  25
   0   6  -3 2314.52 302.818  29
   0   6   3 1395.95 233.736  18
   0   6  -3 1305.49 180.413  25
   0   6  -3 1205.68 163.481   2
   0  -6  -3 1798.94 231.605   3
   0   6  -3 1296.16 229.457   6
   0   6   3 1405.95 239.890   6
   0  -6  -3 1718.63 151.578  10
   0   6   3 1393.60 223.502  19
   0  -6   3 1358.19 234.689  21
   0  -6  -3 1451.19 157.896  20
   0  -6   4 1918.13 170.965  14
   0  -6  -4 1422.04 217.220   8
   0   6  -4 2041.75 227.484   2
   0   6  -4 2022.71 127.159  17
   0  -6  -4 1461.12 247.150  12
   0  -6   4 2398.63 297.570  21
   0  -6  -4 1966.22 256.647  24
   0  -6   4 1785.90 272.957  16
   0  -6  -4 1883.61 139.741  10
   0   6  -4 1541.29 229.744  18
   0  -6  -4 2339.60 282.884  28
   0  -6  -4 1926.17 226.177  21
   0   6   4 1927.80 255.004  29
   0   6  -4 1780.61 269.269  29
   0   6   4 1948.11 288.184  18
   0   6  -4 1799.67 209.998  25
   0   6   4 1773.25 253.385  25
   0   6   4 2194.83 276.316  19
   0  -6  -4 1614.03 210.663   3
   0   6  -4 2093.72 279.618   6
   0   6   4 1918.68 283.460   6
   0  -6  -4 1645.93 168.316  20
   0  -6  -4 1934.13 199.756   4
   0  -6  -4 2778.89 149.818  17
   0  -6   4 2132.44 285.207   3
   0   6  -5 2902.92 259.616  25
   0  -6  -5 2782.54 217.976  20
   0  -6   5 2758.47 334.289   3
   0  -6  -5 3121.91 196.769  17
   0   6   5 2684.41 333.918  18
   0  -6   5 2531.42 319.179  21
   0   6  -5 2924.52 187.449  17
   0  -6   5 2612.58 328.270  16
   0  -6   5 2793.52 228.323  14
   0  -6  -5 2392.15 286.792   8
   0   6   5 2536.95 309.859  25
   0   6   5 2102.03 260.135  29
   0   6  -5 3044.69 335.581   6
   0  -6  -5 3088.93 284.396   3
   0   6   5 2968.36 314.500  19
   0   6  -5 2769.22 304.575  18
   0   6  -5 2639.84 270.540   2
   0  -6  -5 2710.79 328.740  12
   0  -6  -5 3083.48 279.882  21
   0   6  -5 2957.29 350.339  29
   0  -6  -5 2564.61 293.131  24
   0   6   5 2891.39 335.845   6
   0  -6  -5 2487.36 245.510   4
   0  -6  -5 3222.68 329.015  28
   0   6  -5 2426.67 308.923  15
   0   6  -6 79437.0 1817.82  25
   0  -6  -6 78510.7 1707.14  20
   0   6  -6 77081.0 2120.55  15
   0  -6  -6 78211.9 2154.59  12
   0   6   6 80011.3 2169.56  18
   0   6  -6 81033.3 2003.51  18
   0   6   6 77979.7 1984.54  29
   0   6  -6 79059.9 1981.75   2
   0  -6  -6 83468.7 1692.38  17
   0   6  -6 80860.8 1670.30  17
   0  -6   6 78339.5 2141.19  16
   0   6   6 77094.8 2096.97  25
   0  -6  -6 80136.2 1856.86   3
   0  -6  -6 77567.7 2008.60   8
   0   6  -6 78736.5 2074.67   6
   0  -6  -6 78462.1 1903.16   4
   0  -6   6 75553.2 2107.23  21
   0  -6  -6 77070.1 2007.66  24
   0   6   6 75887.8 1983.54  19
   0  -6   6 80357.8 1807.47  14
   0  -6   6 78636.2 2144.30   3
   0   6  -6 82775.1 2204.90  29
   0   6   6 77582.1 2122.13   6
   0  -6  -7 10803.2 476.258  17
   0   6   7 10719.4 595.272  19
   0  -6   7 10116.2 654.854   3
   0   6   7 9625.68 646.983  18
   0  -6   7 11234.3 494.424  22
   0   6   7 10542.6 661.559   6
   0   6  -7 9843.29 651.185  27
   0  -6   7 10139.9 520.157  14
   0   6  -7 10736.5 581.668  18
   0   6   7 10687.0 586.847  29
   0  -6  -7 9341.83 584.649   8
   0  -6  -7 10861.1 510.081   3
   0   6  -7 10172.5 598.420   2
   0   6   7 9915.06 643.805   5
   0  -6  -7 9997.84 596.850  24
   0   6  -7 9702.70 611.285   6
   0  -6  -7 11185.8 695.889  12
   0  -6   7 10705.8 673.972  16
   0   6  -7 10456.4 464.653  17
   0  -6  -7 10656.2 464.687  20
   0   6  -7 11186.1 518.189  25
   0   6  -7 9165.79 624.812  15
   0  -6   7 9694.34 648.681  21
   0  -6  -7 10607.5 577.721   4
   0  -6   8 41524.0 1085.32  22
   0  -6  -8 40844.8 1073.55  20
   0  -6  -8 37378.7 1397.35  12
   0  -6  -8 36741.3 1253.63   4
   0  -6   8 37739.0 1387.49   3
   0   6  -8 39890.7 1413.04  27
   0  -6  -8 33828.0 1244.42   8
   0   6  -8 38617.6 1328.53   2
   0   6   8 36301.0 1354.20   6
   0  -6  -8 36137.9 1271.17  24
   0   6  -8 40449.5 1084.24   9
   0   6   8 36003.0 1221.12  19
   0   6  -8 39552.0 1121.06  25
   0   6  -8 38880.5 1097.29  17
   0  -6  -8 40455.9 1121.58  17
   0  -6   8 38996.9 1199.08  14
   0   6   8 38979.2 1408.42  18
   0  -6   8 34490.2 1345.35  21
   0   6  -8 34763.7 1344.14  15
   0   6  -8 38301.0 1314.05   6
   0   6   8 37468.2 1359.64   5
   0  -6   8 39740.7 1406.90  16
   0   6  -8 40465.4 1143.91  11
   0   6  -8 39760.3 1214.04  18
   0   6   8 39404.0 1234.81  29
   0   6  -9 1475.44 190.464  11
   0   6  -9 1399.56 192.274  17
   0   6  -9 1336.98 265.614  15
   0   6  -9 1315.08 258.746  27
   0   6  -9 1400.00 265.325   2
   0   6  -9 1500.36 212.929  18
   0  -6  -9 1251.57 229.998  24
   0   6   9 1329.83 206.921  29
   0  -6  -9 1359.64 192.705  17
   0   6  -9 1493.93 193.352  25
   0  -6  -9 1359.78 234.953   4
   0  -6  -9 1263.51 241.133   8
   0  -6   9 969.248 228.147  16
   0   6   9 1481.93 276.360   5
   0  -6  -9 1335.45 269.190  12
   0   6   9 1322.05 261.745   6
   0  -6   9 1056.94 233.423   3
   0  -6   9 1573.01 231.528  14
   0   6   9 1085.05 207.063  19
   0  -6   9 885.233 246.296  21
   0   6   9 1539.50 288.958  18
   0   6  10 49.3869 128.685  18
   0   6 -10 468.360 201.215  15
   0   6  10 162.225 149.453   6
   0   6  10 139.119 149.391   5
   0  -6  10 384.593 157.378  16
   0  -6 -10 64.3462 133.989  12
   0  -6  10 465.931 165.681  14
   0   6 -10 259.303 155.569  27
   0   6 -10 636.120 158.282  17
   0  -6 -10 139.856 150.453   8
   0  -6 -10 166.984 108.928  17
   0  -6 -10 199.270 139.586   4
   0   6  10 303.896 139.320  19
   0   6 -10 255.519 141.144   2
   0  -6  10 205.446 147.787   3
   0  -6 -10 82.7771 124.439  24
   0  -6  10 53.8827 142.980  21
   0   6  10 253.949 89.7844  29
   0  -6  11 4611.44 470.142  16
   0   6 -11 4695.88 471.516  27
   0  -6  11 3462.07 432.451  21
   0   6  11 4131.18 457.278  18
   0  -6 -11 3976.40 415.504   8
   0  -6 -11 4940.96 411.712  17
   0  -6 -11 4408.53 452.412   4
   0  -6 -11 4306.00 422.899  24
   0   6  11 4215.20 387.230  19
   0  -6 -11 5123.94 518.216  12
   0  -6  11 4537.46 469.513   3
   0  -6  11 3720.28 387.591  14
   0   6 -11 3816.61 436.578   2
   0   6 -11 4172.18 464.531  15
   0   6  11 4742.86 480.575   6
   0   6  11 3948.53 435.826   5
   0   6 -11 4385.78 382.697  17
   0   6 -12 28040.5 1231.56  27
   0   6 -12 28452.4 1279.87   2
   0  -6  12 29199.5 1260.27  16
   0  -6  12 26406.3 1198.83   3
   0  -6 -12 27856.4 1273.67  12
   0  -6 -12 29433.4 1129.52  17
   0   6  12 29963.7 1098.37  19
   0  -6  12 26643.5 1236.88   1
   0  -6  12 28097.8 1270.48  21
   0  -6 -12 27410.7 1163.94  24
   0   6  12 29431.2 1267.25   6
   0  -6 -12 26793.0 1211.56   4
   0  -6 -12 25784.6 1149.71   8
   0  -6  12 26668.9 1143.20  14
   0   6 -12 30402.9 1126.94  17
   0   6 -12 27962.4 1268.60  15
   0   6  12 27597.2 1242.35  18
   0   6  12 27605.3 1218.22   5
   0  -6  13 262.888 124.864   3
   0  -6 -13 252.893 199.525  12
   0   6  13 372.460 191.265   5
   0  -6 -13 382.939 183.974   4
   0  -6 -13 217.180 150.018   8
   0  -6  13 311.317 188.637  21
   0  -6  13 122.733 150.253  16
   0   6 -13 543.165 164.848  17
   0  -6  13 246.942 156.197  14
   0   6 -13 103.852 167.193  15
   0   6  13 471.361 199.212   6
   0  -6 -13 297.109 137.959  24
   0  -6 -13 188.534 102.041  17
   0   6 -13 618.705 216.896   2
   0   6  13 79.2194 131.771  18
   0  -6  13 80.6207 197.203   1
   0   6 -13 336.476 168.521  27
   0  -6  14 19189.7 1021.49   3
   0  -6 -14 17476.3 971.336   8
   0  -6  14 20658.1 1082.55  16
   0   6 -14 17503.4 1032.33  15
   0   6 -14 18585.7 1086.20   2
   0  -6  14 17465.0 1033.05  21
   0   6  14 18742.1 1037.14   6
   0  -6  14 16727.7 1025.12   1
   0  -6 -14 18578.4 1076.08  12
   0   6 -14 18045.5 1005.86  27
   0   6  14 19162.1 1049.83  18
   0   6 -14 18658.1 946.987  17
   0  -6 -14 18500.0 984.920  24
   0   6  14 16616.3 978.147   5
   0  -6 -14 18718.0 1060.54   4
   0  -6 -14 19767.3 984.842  17
   0  -6  14 17122.3 967.538  14
   0   6 -15 438.434 203.177  15
   0   6 -15 1030.75 267.124  27
   0  -6 -15 508.676 212.164  12
   0   6 -15 651.914 209.087  17
   0  -6 -15 592.226 200.815  17
   0  -6 -15 698.559 264.079   4
   0  -6  15 303.686 196.182   1
   0   6 -15 497.529 195.614   2
   0  -6 -15 579.213 206.573  24
   0  -6 -15 856.800 243.118   8
   0   6  15 411.729 210.906   5
   0  -6  15 396.453 178.753  14
   0  -6  15 673.911 220.032   3
   0  -6  15 673.834 224.324  16
   0   6  15 502.997 201.701   6
   0  -6  15 716.606 246.660  21
   0   6  15 986.975 277.619  18
   0  -6 -16-5.81033 136.200  17
   0  -6  16 200.740 155.834   3
   0   6 -16-90.3790 158.829  27
   0   6 -16-41.5232 201.840  15
   0   6  16 107.563 155.631   5
   0   6  16-60.0428 177.705  18
   0  -6  16-71.1685 183.465   1
   0  -6 -16-67.7000 185.357  24
   0  -6  16 456.416 273.395  21
   0  -6  16 152.650 137.311  16
   0   6 -16 278.166 172.136  17
   0   6  16 103.225 150.443   6
   0  -6 -16 116.913 154.116   8
   0  -6 -16 232.569 184.816   4
   0  -6  16-80.8625 186.433  14
   0  -6 -16 206.620 159.554  12
   0  -6 -17-68.6490 146.993  17
   0   6 -17-52.6310 128.538  17
   0   6  17 177.380 179.675  18
   0  -6 -17-82.9138 160.244  12
   0   6 -17 40.6164 138.628  27
   0   6  17-15.8486 167.207   5
   0  -6 -17 273.781 204.669   4
   0   6 -17 187.409 210.288  15
   0  -6 -17 41.9076 161.757  24
   0  -6  17-42.3913 197.454   1
   0   6  17 149.723 138.456   6
   0  -6  17 70.4027 167.011  14
   0  -6 -17 60.9724 159.909   8
   0  -6  17 24.1631 142.310  16
   0  -6  17-56.7183 151.058  21
   0  -6 -18 1545.27 354.274   4
   0  -6  18 1372.03 345.264   1
   0  -6 -18 1370.04 323.145   8
   0  -6  18 1181.09 318.814  14
   0  -6  18 1680.49 343.249  16
   0   6 -18 1418.77 316.497  17
   0  -6 -18 1260.33 289.895  24
   0   6  18 1057.14 289.887   5
   0   6  18 1300.77 325.166  18
   0  -6 -18 1140.81 329.845  12
   0  -6 -18 1547.24 331.947  17
   0  -6  18 1423.81 363.266  21
   0   6 -18 1103.08 313.041  15
   0   6  18 729.442 250.164   6
   0   6 -18 1478.63 304.062  27
   0  -6  19-627.281 281.321   1
   0  -6  19-139.339 199.981  21
   0   6 -19-155.751 170.311  17
   0  -6 -19-149.282 174.937  17
   0  -6 -19-50.2985 163.227  24
   0   6 -19-84.6828 145.894  27
   0   6  19-98.7690 177.647  23
   0  -6 -19 582.310 287.937   4
   0  -6 -19-91.0471 175.858  12
   0   6 -19 94.6865 202.900  15
   0  -6  19 70.5231 177.926  16
   0   6  19-25.9730 195.068   5
   0  -6  19-49.6579 187.961  14
   0   6  19 203.921 155.795   6
   0  -6 -20 13196.5 992.145  17
   0   6  20 12275.3 967.445   5
   0   6  20 13489.6 996.525   6
   0   6  20 12599.1 977.185  23
   0  -6 -20 12171.7 993.599  12
   0  -6  20 12451.3 1052.93   1
   0   6 -20 11363.4 958.245  15
   0  -6 -20 13227.8 970.929  24
   0  -6 -20 13261.4 1079.29   4
   0   6 -20 10700.4 893.135  17
   0  -6  20 11443.2 947.873  21
   0  -6  20 12195.1 1022.31  14
   0  -6  21 183.110 204.936   1
   0  -6 -21 386.825 250.201  24
   0   6 -21 423.421 259.150  15
   0  -6 -21 629.963 280.373  12
   0  -6  21 240.286 173.027  21
   0   6  21 706.781 266.470  23
   0   6  21 942.543 340.561   5
   0   6  21 462.276 252.107  22
   0   6 -21-15.5484 162.185  17
   0  -6  21 445.934 245.658  14
   0  -6  22 1084.16 351.012  14
   0  -6  22 534.360 268.520  21
   0  -8   0 29629.7 1314.75  16
   0  -8   0 30568.8 1016.01  10
   0   8   0 30067.8 1277.86   6
   0   8   0 30164.8 1245.00  18
   0  -8   0 28194.9 1137.70  21
   0   8   0 29100.5 1230.59  29
   0  -8   0 26504.2 1143.73  12
   0   8   0 28438.5 1103.19  25
   0  -8   0 27411.9 1146.95   8
   0  -8   0 29718.1 1244.76  28
   0  -8   0 28393.3 1180.27   3
   0   8   1 18006.3 987.781   6
   0   8  -1 17568.0 931.294  18
   0  -8   1 19034.8 951.914   3
   0   8   1 18474.0 973.173  18
   0  -8  -1 20201.1 981.525  28
   0   8   1 18438.2 952.613  29
   0   8  -1 18441.2 970.910  29
   0  -8   1 19406.5 814.735  10
   0   8  -1 19091.0 993.339   6
   0  -8   1 18713.7 1024.84  16
   0  -8  -1 18274.5 879.494  21
   0  -8   1 18860.2 914.309  21
   0   8  -1 19245.9 861.540  25
   0  -8  -1 19339.7 957.418  12
   0  -8  -1 17971.5 901.978   3
   0  -8   1 19499.1 940.223  12
   0  -8  -1 18182.0 903.525   8
   0   8   1 19379.1 896.422  25
   0   8   2 3498.65 426.885  18
   0   8   2 2840.77 348.014  25
   0  -8   2 2140.36 275.253  10
   0  -8  -2 2583.79 326.832   3
   0  -8  -2 2575.03 350.762  28
   0  -8   2 2399.67 334.841  21
   0  -8  -2 2129.04 308.462   8
   0   8  -2 2700.24 376.372   6
   0   8   2 2200.43 329.917  19
   0   8  -2 2478.03 361.917  29
   0  -8  -2 2929.55 342.065  21
   0   8   2 3141.81 381.001  29
   0  -8   2 2739.81 368.023   3
   0   8  -2 2608.49 350.401  18
   0  -8  -2 1946.21 300.010  24
   0   8  -2 2287.49 289.319  25
   0  -8  -2 2639.23 373.786  12
   0  -8   2 2155.57 366.867  16
   0   8   2 2562.94 370.786   6
   0   8   3 1493.06 282.116  29
   0  -8   3 1741.90 314.626  16
   0  -8  -3 1425.28 242.737  21
   0   8  -3 1579.59 290.573   6
   0   8   3 2323.18 352.179  18
   0   8  -3 1468.28 223.709  25
   0  -8  -3 1574.69 268.059  24
   0   8   3 1754.70 298.307  19
   0  -8   3 1610.13 281.742   3
   0   8   3 1491.35 282.450   6
   0  -8  -3 1908.15 322.997  12
   0   8  -3 1818.14 299.181  18
   0  -8   3 1932.00 304.550  21
   0   8  -3 1731.92 310.959  29
   0  -8  -3 1696.36 292.415  28
   0   8   3 1613.10 277.090  25
   0  -8  -3 1628.79 259.117   3
   0  -8  -3 1440.95 258.189   8
   0   8  -4 744.303 224.522  15
   0   8  -4 613.555 203.612  18
   0  -8  -4 666.080 165.311  21
   0   8  -4 1062.71 257.176  29
   0  -8   4 806.906 225.998  21
   0   8  -4 696.749 150.934   2
   0  -8  -4 754.251 233.811  12
   0   8   4 812.125 235.342   6
   0   8  -4 553.532 147.902  25
   0   8   4 1026.77 230.872  19
   0  -8  -4 674.849 190.956   8
   0  -8   4 733.133 157.055   1
   0   8   4 440.852 196.410  18
   0  -8   4 681.672 224.040  16
   0   8   4 692.740 199.373  29
   0  -8  -4 966.472 226.776  24
   0  -8   4 851.964 232.346   3
   0  -8  -4 1512.48 245.526   3
   0  -8  -4 489.698 171.224  28
   0   8   4 720.593 213.117  25
   0   8  -4 682.323 221.455   6
   0  -8  -5 2586.85 353.090  24
   0   8  -5 2823.44 360.866  18
   0  -8  -5 3576.98 364.452   3
   0   8   5 2763.16 359.414  25
   0  -8  -5 3229.39 391.428  28
   0   8  -5 2785.25 376.299  15
   0   8   5 2885.64 352.413  19
   0   8   5 3454.62 434.766   6
   0  -8   5 3388.17 439.390  16
   0  -8   5 2617.13 290.844   1
   0   8  -5 3226.31 319.373  25
   0  -8   5 4358.63 472.200  21
   0   8  -5 3273.89 423.838  29
   0   8   5 3099.96 424.380  18
   0   8   5 3209.56 378.310  29
   0   8  -5 2642.99 363.651   6
   0  -8  -5 3235.65 386.259   8
   0  -8   5 2528.54 370.416   3
   0  -8  -5 3211.96 423.508  12
   0  -8  -5 3497.19 354.359  21
   0   8  -5 3699.86 337.637   2
   0  -8   6 28277.3 1305.51  16
   0   8   6 27873.6 1292.05  18
   0   8  -6 27182.5 1231.04  15
   0  -8  -6 26881.4 1163.34  24
   0  -8   6 26168.1 1214.63  21
   0   8  -6 29530.7 1266.75   6
   0  -8   6 28742.8 1069.38   1
   0  -8  -6 30482.2 1104.29   3
   0   8   6 29622.4 1196.01  29
   0   8   6 30522.3 1321.20   6
   0   8   6 29337.5 1200.00  19
   0  -8  -6 25843.3 1149.68   8
   0   8  -6 28441.0 1184.37  18
   0  -8  -6 27534.7 1272.34  12
   0  -8   6 30170.2 1315.66   3
   0   8  -6 29973.2 1085.47   2
   0   8   6 27650.7 1218.28  25
   0   8  -6 29168.2 1303.20  29
   0   8   7 24501.9 1084.06  19
   0   8  -7 24993.7 1088.76  18
   0  -8  -7 23103.1 1075.16  24
   0   8  -7 20953.6 1104.08  15
   0  -8   7 23876.2 1175.36   3
   0  -8  -7 25192.5 1218.00  12
   0  -8   7 24440.9 1168.36  21
   0   8  -7 23684.0 1190.65  27
   0   8   7 22687.1 1116.98  25
   0   8   7 23903.8 1204.53  18
   0  -8   7 23639.6 997.045   1
   0  -8  -7 20369.7 1018.90   8
   0   8   7 24554.1 1068.08  29
   0   8  -7 24106.6 1002.04   2
   0  -8   7 24100.5 1199.76  16
   0   8   7 23299.0 1160.64   6
   0   8  -7 22561.2 1108.41   6
   0   8  -8 30607.4 1206.18  18
   0  -8   8 28012.4 1321.17  16
   0   8   8 28160.9 1325.15  18
   0   8   8 29706.6 1181.28  29
   0  -8   8 29021.1 1160.44   1
   0  -8  -8 25039.7 1155.23   8
   0  -8   8 29179.3 1332.50   3
   0   8  -8 24314.6 1214.48  15
   0  -8  -8 27668.3 1318.76  12
   0  -8  -8 25346.0 1166.57  24
   0   8   8 26734.8 1251.43  25
   0   8   8 28387.1 1182.06  19
   0   8  -8 28308.3 1327.79  27
   0   8  -8 27101.4 1122.42   2
   0   8   8 29870.2 1342.58   6
   0   8  -8 26934.8 1232.17   6
   0  -8   8 28971.4 1306.09  21
   0  -8   9 1467.25 269.116   1
   0   8  -9 1550.89 300.852   6
   0   8   9 1953.64 362.001  18
   0  -8  -9 1601.93 302.672  24
   0   8   9 2051.76 300.302  29
   0   8   9 2003.17 304.413  19
   0  -8   9 1323.64 292.092   3
   0   8  -9 1455.37 325.328  15
   0   8  -9 2270.22 397.312  27
   0  -8  -9 1642.97 305.093   8
   0  -8   9 1438.22 320.935  21
   0   8   9 1690.25 338.455  25
   0   8   9 1870.90 357.743   6
   0   8  -9 1787.82 277.895  18
   0  -8   9 1523.33 306.437  16
   0   8  -9 1250.71 251.625   2
   0  -8  -9 1611.05 340.381  12
   0   8  10 636.871 203.823  19
   0  -8  10 234.224 171.492  16
   0   8 -10 914.234 268.127  27
   0   8  10 613.120 234.786   6
   0   8 -10 674.166 204.985   2
   0  -8 -10 334.452 179.585   8
   0   8  10 805.376 247.959  25
   0   8  10 781.188 276.248  18
   0  -8 -10 871.933 224.194  24
   0  -8  10 840.866 226.530   1
   0   8  10 959.039 216.267  29
   0  -8 -10 578.396 211.925  12
   0  -8  10 662.857 237.409  21
   0  -8  10 824.510 254.949   3
   0   8 -10 579.561 217.479  15
   0   8 -11 370.218 214.770  15
   0   8 -11 287.263 192.296  27
   0  -8  11 645.192 233.650  21
   0   8  11 491.987 218.524   6
   0  -8 -11 261.577 190.488   8
   0  -8  11 573.745 247.632  16
   0   8 -11 264.678 157.379   2
   0   8  11 204.417 175.028  18
   0  -8  11 432.300 186.626   3
   0  -8  11 54.1225 156.172   1
   0  -8 -11 188.640 192.834  12
   0   8  11 292.368 173.746  25
   0  -8 -11 307.161 182.080  24
   0  -8 -12 11037.3 800.002  24
   0   8 -12 13037.7 930.354  27
   0  -8  12 13359.9 943.561  16
   0   8 -12 10621.6 843.837  15
   0   8  12 12891.3 924.344  25
   0  -8  12 10791.5 782.524   1
   0  -8 -12 12150.0 924.810  12
   0   8  12 12398.1 909.988  18
   0   8  12 12249.2 890.725   6
   0   8 -12 11301.5 808.629   2
   0  -8  12 11944.4 872.844   3
   0  -8 -12 11122.3 801.497   8
   0  -8  12 12189.6 899.640  21
   0  -8  13 7626.60 737.723  21
   0  -8  13 10198.9 837.581  16
   0  -8  13 7630.18 679.756   1
   0   8  13 8042.64 735.569   6
   0  -8 -13 7356.82 657.637   8
   0   8 -13 6560.81 679.692  15
   0   8  13 7985.83 740.818  18
   0  -8  13 9420.16 784.794   3
   0   8 -13 9446.59 803.505  27
   0  -8 -13 7947.45 690.228  24
   0   8  13 6899.41 698.521  25
   0  -8 -13 8169.19 779.169  12
   0  -8  14 5845.17 654.413  21
   0  -8 -14 5146.21 570.878  24
   0   8  14 5768.79 668.039  25
   0   8 -14 6631.39 688.942  27
   0  -8 -14 4411.41 591.307  12
   0  -8  14 6714.59 691.521  16
   0   8  14 5841.60 648.265   5
   0  -8 -14 4581.40 541.143   8
   0   8  14 6789.10 689.336  18
   0   8  14 5187.34 595.684   6
   0   8 -14 4460.28 585.557  15
   0  -8  14 5309.39 593.621   1
   0  -8  14 5337.51 603.015   3
   0   8  15 4354.45 576.821  18
   0   8  15 4337.29 564.137   6
   0   8  15 4102.01 581.858  25
   0  -8 -15 3683.60 535.729  12
   0  -8  15 3785.45 521.238   3
   0  -8 -15 3918.56 521.929   8
   0  -8 -15 3112.83 471.068  24
   0   8 -15 3130.30 502.002  15
   0   8  15 3234.57 503.263   5
   0  -8  15 4855.67 610.353  21
   0  -8  15 3843.61 542.710  16
   0   8 -15 4690.01 592.346  27
   0  -8  15 3918.94 529.126   1
   0   8  16 839.570 306.639  25
   0   8 -16 1136.24 341.317  15
   0   8 -16 692.300 272.774  27
   0  -8 -16 834.986 266.689  24
   0  -8 -16 756.345 271.135   8
   0  -8  16 780.113 291.889  16
   0   8  16 881.972 319.568   5
   0   8  16 580.473 216.960  18
   0  -8 -16 1014.30 316.020  12
   0  -8  16 395.492 218.483   1
   0  -8  16 1018.59 306.519   3
   0  -8  16 913.923 318.496  21
   0   8  16 754.906 264.780   6
   0  -8 -17 1457.55 358.692   8
   0   8  17 838.518 308.290  25
   0   8 -17 353.267 244.547  15
   0   8  17 521.242 263.420   6
   0  -8 -17 909.602 345.594  12
   0   8  17 366.195 272.722   5
   0   8  17 435.080 212.132  18
   0  -8  17 495.679 238.079  21
   0  -8 -17 545.617 226.312  24
   0  -8  17 574.251 236.724   3
   0  -8  17 480.561 234.473   1
   0   8 -17 247.849 194.585  27
   0  -8  17 757.956 289.117  16
   0   8 -18-245.299 208.837  15
   0  -8  18 19.4796 219.113   1
   0  -8 -18-19.3768 206.947  24
   0  -8 -18 209.411 235.268  12
   0   8  18 315.412 224.871   6
   0   8 -18 458.990 277.080  27
   0  -8  18 31.0771 176.270  16
   0   8  18 394.175 230.339  25
   0   8  18 258.798 268.636   5
   0   8  18-18.1692 187.348  18
   0  -8  18 427.516 251.107  21
   0  -8 -18-253.856 249.802   8
   0  -8 -19 1462.15 362.907   8
   0   8 -19 1041.91 323.518  15
   0  -8 -19 1494.99 356.064  24
   0   8 -19 1061.87 354.357  27
   0  -8  19 1457.06 383.275   1
   0   8  19 1192.35 345.651  18
   0   8  19 1477.69 395.463  25
   0   8  19 1405.32 363.357   6
   0  -8 -19 1810.24 440.309  12
   0   8  19 1630.09 404.085   5
   0  -8  19 1589.08 384.523  21
   0   8  20 2284.30 450.030   6
   0  -8  20 3303.94 556.621  21
   0 -10   0 1318.71 290.249  24
   0 -10   0 1174.55 292.641   8
   0  10   0 1276.15 256.066  25
   0  10   0 1528.52 331.959   6
   0 -10   0 927.622 251.047   3
   0 -10   0 1128.41 268.757  21
   0  10   0 1147.56 303.228  29
   0  10   0 1299.22 302.019  18
   0 -10   0 1152.20 265.171  12
   0 -10   0 1222.56 280.451  28
   0 -10   1 29712.1 1358.69  28
   0  10  -1 28898.4 1178.44  25
   0  10   1 27910.4 1338.49  18
   0  10   1 28234.9 1338.39  29
   0  10  -1 26370.1 1284.15  18
   0 -10   1 26179.1 1266.13   3
   0 -10   1 27372.8 1246.75  12
   0 -10  -1 24947.3 1195.00   8
   0 -10  -1 27210.5 1207.00  21
   0 -10   1 23927.9 1184.37   8
   0 -10  -1 28599.7 1318.62  28
   0  10  -1 27871.3 1343.16  29
   0 -10  -1 27363.5 1260.24   3
   0 -10   1 25242.5 1189.78  21
   0 -10  -1 26657.3 1257.59  12
   0  10   1 27443.4 1194.63  25
   0  10  -1 26714.4 1333.52   6
   0 -10  -1 25854.0 1159.87  24
   0  10   1 26440.1 1339.90   6
   0  10   2 486.149 228.145  18
   0 -10   2 470.226 208.836   3
   0 -10  -2 717.256 233.175   8
   0  10   2 596.642 237.352  29
   0 -10  -2 457.556 201.013  12
   0  10  -2 550.162 228.214  18
   0 -10  -2 253.253 181.312   3
   0 -10   2 867.549 277.418  16
   0 -10   2 552.381 247.508   8
   0  10  -2 299.692 225.514   6
   0 -10   2 336.764 196.639  21
   0  10  -2 327.633 208.725  29
   0 -10  -2 723.686 223.825  24
   0 -10  -2 455.579 186.656  21
   0 -10  -2 668.674 223.817  28
   0  10   2 689.183 223.131  25
   0 -10   2 489.720 207.562  12
   0  10   2 522.206 233.119   6
   0  10  -3 1092.14 263.489  15
   0  10   3 821.410 278.962   6
   0 -10   3 1538.52 346.617  16
   0  10  -3 1200.76 253.207  18
   0  10   3 870.141 254.962  18
   0  10  -3 1141.98 292.332  29
   0 -10   3 804.791 227.658   3
   0 -10   3 1105.18 270.243  21
   0  10   3 963.079 273.614  29
   0 -10  -3 1534.43 279.219  21
   0 -10   3 1008.17 276.177  12
   0  10   3 954.088 239.061  25
   0 -10  -3 1134.54 275.015  28
   0 -10  -3 750.962 215.601   8
   0 -10  -3 841.760 262.783  12
   0 -10  -3 999.643 235.073   3
   0  10  -3 780.846 243.619   6
   0 -10  -3 905.242 235.103  24
   0 -10  -4 43.9614 165.407  12
   0  10   4 306.625 162.145  25
   0  10  -4-141.344 202.674   6
   0 -10  -4 61.0242 113.206   3
   0 -10  -4-31.9954 146.252  21
   0 -10   4 51.3928 160.492   3
   0  10   4 81.8757 152.746   6
   0  10   4 352.812 214.531  18
   0 -10   4 248.309 178.934  12
   0 -10  -4-212.349 177.636  24
   0 -10   4 18.8758 190.762  16
   0  10  -4 0.73964 151.870  29
   0 -10   4-120.106 143.356  10
   0 -10   4 145.964 171.590  21
   0 -10  -4 33.9749 129.307  28
   0 -10  -4 52.3264 146.883   8
   0  10   4-33.7788 162.500  29
   0  10  -4 15.3764 145.678  15
   0  10  -4-53.4070 126.521  18
   0  10   5 16724.5 1093.00  18
   0 -10  -5 19104.1 958.320  21
   0 -10  -5 20336.4 1112.65  28
   0  10   5 19739.7 1169.24   6
   0  10  -5 17127.9 1015.60  15
   0 -10   5 17185.7 1060.40   3
   0 -10  -5 17181.7 1058.54  12
   0 -10  -5 20554.5 1022.31   3
   0 -10   5 19859.5 1018.94  10
   0  10  -5 19739.1 1063.39  18
   0 -10   5 18653.8 1158.24  16
   0 -10  -5 17713.3 988.376  24
   0  10   5 17595.7 1023.62  29
   0  10  -5 17614.9 1080.21   6
   0  10   5 18890.6 1059.82  25
   0 -10  -5 15938.7 961.596   8
   0 -10   5 17791.2 1039.72  21
   0 -10  -6-77.2550 186.389   8
   0  10   6 386.467 192.984  19
   0 -10   6 399.653 228.445  21
   0  10   6 314.297 211.343  25
   0  10   6 248.072 218.711   6
   0 -10   6 66.7035 143.124  10
   0 -10  -6 209.081 200.840  12
   0  10  -6 217.253 192.534   6
   0 -10   6 226.434 214.727   3
   0  10   6 715.766 282.445  18
   0  10  -6 88.8076 187.192  15
   0 -10  -6-256.819 190.098  24
   0  10   6 166.907 173.890  29
   0 -10   6-48.7559 202.517  16
   0  10  -6 66.0180 137.357  18
   0  10  -6 121.793 207.109  27
   0  10  -7 19809.3 1140.55  15
   0  10  -7 20169.0 1224.13  27
   0 -10   7 18868.4 1116.88  21
   0 -10  -7 20438.8 1207.76  12
   0 -10  -7 17674.9 1040.97   8
   0  10  -7 20424.3 1179.77   6
   0  10   7 20534.4 1233.69  18
   0  10   7 21504.2 1174.21  25
   0 -10   7 21059.9 1198.89   3
   0  10  -7 19316.8 1062.49  18
   0  10   7 22844.4 1264.23   6
   0  10   7 22418.4 1140.78  29
   0 -10   7 22503.8 1295.71  16
   0 -10  -7 21526.8 1121.29  24
   0  10   7 20949.3 1107.29  19
   0 -10   8 173.683 193.654  21
   0  10  -8-248.484 182.743  27
   0 -10  -8-20.2265 165.205   8
   0 -10   8 58.5438 157.757   3
   0 -10   8 11.2019 176.684  16
   0  10   8 193.527 189.153  25
   0  10   8 327.225 217.253   6
   0 -10  -8-118.148 159.740  12
   0  10   8-52.8413 152.598  29
   0  10  -8 316.285 194.690   6
   0  10  -8 64.0154 174.357  15
   0  10   8 425.043 172.396  19
   0  10   8 235.048 206.818  18
   0 -10  -8 76.5200 152.934  24
   0  10  -9 1815.75 408.427  27
   0 -10  -9 1641.32 334.207  24
   0 -10  -9 1614.72 334.800   8
   0  10  -9 1475.25 354.005   6
   0  10   9 1919.16 337.557  19
   0 -10  -9 1122.52 326.316  12
   0 -10   9 1626.25 370.017  16
   0  10   9 864.851 285.192  25
   0 -10   9 1822.18 392.918  21
   0 -10   9 1401.00 316.896   3
   0  10   9 1516.31 376.895   6
   0  10  -9 1345.48 326.712  15
   0  10   9 1308.32 352.640  18
   0  10  10 43.9421 189.552  18
   0 -10 -10-89.8391 177.130  24
   0  10 -10-66.1327 169.072  15
   0  10 -10 64.8565 183.332  27
   0 -10 -10 11.2820 144.167   8
   0 -10  10 292.945 195.527  16
   0  10  10 266.912 211.652   6
   0 -10 -10-126.107 218.755  12
   0 -10  10 99.1013 173.469  21
   0 -10  10 22.9229 170.680   3
   0  10  10 344.145 245.222  25
   0  10  11 1263.30 344.513   6
   0 -10 -11 355.093 192.709   8
   0 -10  11 976.306 312.617  21
   0 -10  11 891.175 292.954   3
   0  10  11 1092.98 315.375  25
   0  10  11 1020.92 319.942  18
   0  10 -11 1276.16 374.731  27
   0 -10 -11 716.345 282.946  24
   0 -10  11 1152.64 341.933  16
   0  10 -11 687.416 274.261  15
   0 -10 -11 509.458 262.792  12
   0  10  12 329.759 227.392   6
   0 -10 -12-40.3797 208.889  24
   0  10 -12 389.810 238.645  15
   0 -10  12 324.991 248.622  21
   0 -10  12 72.4779 189.773   3
   0  10  12 396.738 253.177  25
   0 -10  12-2.75639 130.252   1
   0 -10 -12 91.0297 173.590   8
   0 -10 -12 237.764 250.918  12
   0  10 -12-118.156 210.505  27
   0 -10  12 97.2058 207.374  16
   0  10  12 50.6629 198.933  18
   0 -10  13 9723.09 884.723   3
   0 -10 -13 9595.08 819.297  24
   0  10  13 9397.23 875.432  25
   0 -10  13 8690.07 742.451   1
   0 -10  13 8446.16 823.126  21
   0  10 -13 8418.29 829.522  15
   0 -10 -13 9696.52 938.414  12
   0 -10 -13 7224.28 713.773   8
   0  10  13 9816.94 888.361   6
   0  10  13 10970.2 949.646  18
   0 -10  13 10147.4 921.513  16
   0  10 -13 10401.8 930.734  27
   0 -10 -14 250.622 223.936  12
   0 -10 -14 31.6733 155.081  24
   0  10 -14 308.504 242.289  27
   0 -10  14-263.562 203.049  21
   0  10  14 538.139 299.536  25
   0  10  14 100.131 223.668   6
   0 -10  14 188.812 223.975  16
   0  10 -14 391.420 248.763  15
   0 -10  14-96.2486 188.414   1
   0  10  14 139.802 195.992  18
   0 -10  14 303.663 219.546   3
   0 -10 -14 373.311 228.921   8
   0  10  15 4810.11 646.072   6
   0 -10  15 5432.01 690.765  21
   0 -10 -15 4910.15 612.869  24
   0  10  15 3942.97 592.217  25
   0 -10  15 4869.13 644.540   3
   0 -10 -15 4725.58 689.301  12
   0 -10  15 3936.92 595.071  16
   0 -10  15 3351.26 497.632   1
   0 -10 -15 3882.36 540.209   8
   0  10  15 4687.46 626.609  18
   0  10 -15 4634.98 650.334  27
   0  10 -15 4542.37 643.341  15
   0 -10  16 25.2156 192.535  21
   0 -10  16-475.191 227.063   1
   0  10  16 587.378 307.377   6
   0 -10 -16 196.822 229.869  12
   0 -10  16-73.8306 150.582   3
   0  10  16 115.634 189.902  18
   0  10 -16-393.088 251.798  27
   0 -10  16 163.453 216.839  16
   0 -10 -16 184.666 220.755  24
   0  10 -16 103.471 195.846  15
   0 -10 -16-220.353 197.684   8
   0  10  16 39.7639 222.555  25
   0  10  17 286.724 246.555   6
   0 -10  17-37.1586 182.124   3
   0 -10  17 20.0823 184.974   1
   0 -10 -17 310.918 169.302  24
   0 -12   0 10509.5 840.648  28
   0 -12   0 9591.20 804.004   3
   0 -12   0 9305.75 771.587  12
   0  12   0 8945.54 814.655  29
   0  12   0 9200.43 842.737   6
   0  12   0 8369.09 783.298  18
   0 -12   0 9033.35 736.179  21
   0 -12   0 7212.81 693.091   8
   0 -12  -1 396.955 200.907   8
   0  12   1 629.031 271.385  18
   0  12  -1 1114.56 321.903   6
   0 -12  -1 1477.29 335.933  28
   0 -12   1 975.306 280.409  21
   0 -12  -1 1481.96 339.659   3
   0 -12   1 548.202 251.149   8
   0 -12  -1 463.982 188.772  21
   0  12  -1 1268.14 316.119  29
   0  12   1 901.642 262.331  29
   0 -12   1 1208.97 295.255  28
   0 -12   1 968.977 273.818   3
   0 -12  -1 1264.94 317.875  12
   0  12  -1 1177.51 301.694  18
   0 -12   1 1705.23 360.472  12
   0  12  -1 1037.43 304.553  15
   0  12   1 1056.87 310.686   6
   0 -12  -2 1338.58 294.354   3
   0 -12  -2 1667.63 322.405  24
   0 -12   2 1596.35 345.616   3
   0  12  -2 1424.94 325.180  18
   0  12   2 1645.48 341.788  29
   0 -12  -2 2028.21 389.020  28
   0 -12  -2 804.955 253.962   8
   0  12  -2 1117.89 313.709   6
   0 -12   2 868.840 289.360   8
   0 -12  -2 1727.24 325.845  21
   0 -12   2 1489.10 339.074  28
   0  12  -2 1328.45 306.475  15
   0  12   2 1414.08 368.903  18
   0 -12  -2 1483.65 347.093  12
   0 -12   2 1286.27 295.608  21
   0  12   2 1517.38 363.758   6
   0 -12  -3-218.627 213.035  12
   0  12  -3 117.506 150.887   6
   0  12  -3 412.823 218.514  15
   0 -12   3 83.2842 157.050   3
   0  12   3-26.8633 210.880   6
   0 -12   3-126.187 211.752   8
   0  12   3-41.9174 153.852  29
   0 -12   3-38.2322 175.180  21
   0 -12  -3-111.710 163.620  24
   0 -12  -3 259.824 172.837   3
   0 -12   3 157.663 200.159  28
   0  12   3 42.6103 175.035  18
   0 -12  -3-39.7818 151.090   8
   0  12  -3-191.356 191.794  18
   0 -12  -3-58.1880 172.729  28
   0  12   4 340.005 254.709   6
   0 -12  -4 493.315 238.821   8
   0  12  -4 244.179 235.123   6
   0  12  -4 191.691 167.523  15
   0 -12  -4 293.099 209.857  12
   0  12   4 131.739 178.192  18
   0 -12   4 155.531 159.498   3
   0 -12   4 763.429 284.020   8
   0  12  -4-62.4411 220.040  27
   0  12   4 503.864 215.387  29
   0  12   4 984.297 276.927  25
   0 -12   4 548.371 247.141  28
   0 -12   4 39.4190 144.858  21
   0  12  -4 674.059 241.984  18
   0 -12  -4 532.049 232.516  24
   0 -12   5 4285.96 606.050  16
   0 -12   5 3421.71 516.631   3
   0  12  -5 2635.24 441.412  15
   0  12   5 2965.01 512.626   6
   0  12  -5 4851.66 628.787  27
   0 -12  -5 3343.54 518.862  12
   0  12   5 3784.04 517.610  29
   0  12   5 3597.23 495.950  25
   0 -12  -5 3402.68 460.342  24
   0  12   5 3978.05 574.295  18
   0 -12   5 2617.85 445.662  21
   0 -12  -5 3163.70 470.042   8
   0 -12   5 3727.41 517.109   8
   0  12  -5 2707.77 485.162   6
   0  12  -5 3429.58 482.718  18
   0  12   6 1812.37 401.736   6
   0 -12  -6 1571.59 384.434  12
   0  12   6 1946.27 384.441  29
   0 -12  -6 2322.92 375.672  24
   0  12   6 1976.93 384.331  25
   0  12  -6 1727.06 362.687  15
   0  12   6 2908.35 492.213  18
   0 -12   6 1614.84 384.872   3
   0 -12  -6 1596.25 348.422   8
   0  12  -6 1446.09 400.436  27
   0  12  -6 1984.51 424.947   6
   0 -12   6 2138.51 412.415  21
   0 -12   6 2314.83 476.235  16
   0 -12  -7 1855.07 372.458  24
   0  12   7 1697.38 398.431  18
   0  12  -7 1481.10 386.694  27
   0  12  -7 1384.70 363.611   6
   0 -12  -7 1246.96 318.191   8
   0 -12   7 1291.87 325.005  21
   0 -12  -7 1387.89 359.811  12
   0  12  -7 1076.20 314.561  15
   0  12   7 1423.60 341.751  25
   0 -12   7 1463.38 381.844   3
   0  12   7 1380.57 325.116  29
   0  12   7 1226.95 370.454   6
   0 -12   7 1446.86 378.082  16
   0 -12   8 4914.09 674.413  16
   0 -12  -8 4294.72 539.216  24
   0 -12   8 3837.50 554.816  21
   0  12   8 4266.16 575.389  25
   0 -12  -8 3756.72 572.881  12
   0  12  -8 3774.99 523.647  15
   0  12   8 4556.48 635.689  18
   0  12  -8 4577.32 643.260  27
   0 -12  -8 3736.23 519.257   8
   0  12  -8 3930.09 566.643   6
   0 -12   8 4274.46 595.314   3
   0  12   8 3888.16 588.018   6
   0 -12  -9 544.710 239.165   8
   0 -12  -9 65.2947 182.999  12
   0  12   9 473.069 241.145  25
   0 -12   9 1152.28 386.262  16
   0 -12  -9 588.128 236.457  24
   0  12  -9 620.671 326.964  27
   0 -12   9 1115.14 354.837   3
   0  12  -9 450.069 214.988  15
   0  12   9 750.616 294.706   6
   0  12   9 870.254 376.942  18
   0 -12   9 879.031 299.762  21
   0 -12 -10-15.2609 182.150   8
   0 -12 -10-8.71852 188.931  12
   0  12 -10 581.648 294.682  27
   0  12  10 90.6823 181.986  18
   0 -12 -10 113.315 150.799  24
   0  12  10-88.1175 186.393  25
   0  12  10 51.1338 174.730   6
   0 -12  10 370.996 278.659  16
   0 -12  10 364.705 279.172   3
   0  12 -10 307.108 243.056  15
   0 -12  10 335.669 217.362  21
   0 -12  11-418.088 228.129  10
   0  12  11-117.007 186.018   6
   0  12  11 22.3335 182.795  25
   0 -12  11 445.598 268.745  21
   0 -12 -11-299.397 205.110  24
   0  12  11 314.716 246.373  18
   0 -12 -11 124.926 165.761  12
   0  12 -11-134.257 226.504  27
   0 -12  11 196.655 240.867   3
   0 -12 -11-136.266 172.005   8
   0  12 -11-85.8483 157.259  15
   0 -12  11 120.906 179.574  16
   0  12  12 1018.23 328.713  25
   0 -12 -12 893.249 281.492   8
   0 -12 -12 684.424 273.230  24
   0 -12  12 661.168 257.266  10
   0 -12 -13 1237.21 349.580  24
   1   1 -25 740.185 284.240  15
  -1  -1  25 1074.41 349.000   1
   1   1 -25 921.191 317.845   4
  -1  -1  24 7278.82 783.265   1
   1   1 -24 8505.23 937.295  17
   1   1 -24 7303.16 718.047  15
  -1   1  24 8354.24 875.926  14
  -1  -1  24 8067.98 885.275  14
   1   1 -24 8835.81 884.864   4
   1  -1 -24 10908.5 1056.03  17
   1  -1 -24 8084.70 899.289   4
   1  -1 -23 1337.07 390.819   4
   1   1 -23 1237.89 302.301  15
  -1   1  23 1875.45 428.285  14
  -1   1  23 1091.49 317.087   1
   1  -1 -23 2373.91 510.131  17
  -1  -1  23 1955.20 403.673   1
   1   1 -23 806.185 314.244   4
  -1  -1  23 2223.26 510.969  14
  -1   1  23 1213.84 286.928  22
   1   1 -23 1574.52 419.416  17
  -1   1  22 2609.60 410.538  22
  -1  -1  22 2027.97 401.488   1
   1   1 -22 2165.05 449.947  17
   1   1 -22 2688.55 429.306  15
  -1   1  22 1549.39 388.790  14
   1  -1 -22 2664.44 502.450   4
  -1   1  22 2338.43 387.364   1
   1   1 -22 2013.43 436.836   4
  -1  -1  22 1983.11 434.957  14
   1  -1 -22 1944.20 428.744  17
  -1   1  21-2.20219 132.280  16
   1   1 -21-182.865 200.303  15
  -1  -1  21-182.551 201.049  14
   1  -1 -21 52.8775 197.877   4
   1   1 -21 162.108 196.674   4
   1  -1 -21-12.5078 209.998  17
  -1  -1  21 101.859 202.807   1
  -1   1  21 64.2540 123.990  22
   1   1 -21-23.1610 196.254  17
  -1   1  21-96.8575 158.128   1
  -1  -1  21 116.476 147.756  16
  -1   1  21 196.815 166.961  14
   1   1 -20-109.663 176.198  15
  -1   1  20 341.243 234.340  14
   1   1 -20 24.8818 175.792   4
  -1   1  20 230.161 167.529  22
  -1  -1  20 237.363 153.074  22
  -1  -1  20 185.448 241.724  14
  -1   1  20 99.8828 118.767  16
   1  -1 -20-44.1145 192.153  17
  -1  -1  20 63.7594 153.923   1
  -1   1  20 97.6081 154.709   1
   1   1 -20-223.412 177.354  17
  -1  -1  20 5.65664 113.757  16
   1  -1 -20 267.137 206.236   4
  -1  -1  19 1466.33 269.975  21
  -1   1  19 933.689 264.986  14
   1   1 -19 962.531 297.206  17
  -1   1  19 1441.58 282.208  22
  -1  -1  19 1025.59 274.092   1
  -1  -1  19 898.894 305.567  14
   1  -1 -19 1516.81 361.498  17
  -1  -1  19 1023.81 230.910  16
   1  -1 -19 992.627 234.598  15
  -1   1  19 970.859 235.882   1
   1   1 -19 1321.36 279.470  15
  -1  -1  19 1064.64 227.703  22
   1   1 -19 828.446 255.163   4
   1  -1 -19 768.048 262.272   4
  -1  -1  18 6281.63 498.752  22
  -1   1  18 6231.19 472.854  23
  -1   1  18 6545.97 554.157  22
   1   1 -18 6898.50 503.810  27
   1  -1 -18 5797.85 510.274  15
   1  -1 -18 6379.86 669.236  17
   1  -1 -18 5851.25 517.070  24
  -1  -1  18 7867.23 583.559  16
   1  -1 -18 5929.84 630.849   4
  -1   1  18 5756.17 529.147   1
  -1  -1  18 6877.57 555.664  21
  -1  -1  18 7092.31 643.129   1
  -1  -1  18 5054.37 588.426  14
  -1   1  18 5753.61 609.523  14
   1   1 -18 5815.57 629.808  17
   1   1 -18 6182.49 615.246   4
   1  -1 -18 5518.53 505.405  12
   1   1 -18 6084.19 539.090  15
  -1  -1  17 1692.05 346.083  14
   1   1 -17 1899.08 308.125  15
  -1  -1  17 2146.85 302.838  16
  -1   1  17 1829.47 243.912  19
  -1   1  17 2499.16 339.305  22
   1  -1 -17 2036.57 382.046   4
  -1  -1  17 1662.61 256.413  22
   1   1 -17 1866.57 264.548  27
   1   1 -17 1681.19 342.090  17
   1   1 -17 1765.59 323.129   4
  -1  -1  17 1589.63 318.783   1
   1  -1 -17 2399.66 333.719  24
  -1   1  17 2002.20 265.831  23
  -1  -1  17 2091.12 303.745  21
   1  -1 -17 2071.87 298.604  15
   1  -1 -17 1932.29 297.289  12
  -1   1  17 1326.45 267.231   1
   1  -1 -17 1913.30 390.133  17
  -1   1  17 2022.58 364.546  14
  -1  -1  16 42643.4 1420.64  21
   1  -1 -16 42360.8 1682.79   4
   1  -1 -16 42330.0 1416.12  24
  -1   1  16 45801.3 1344.95  21
  -1  -1  16 44866.4 1442.81  16
  -1   1  16 46715.4 1331.81  18
   1   1 -16 46612.5 1384.87  27
   1   1 -16 41965.4 1662.31  17
   1  -1 -16 41528.4 1389.64  15
  -1  -1  16 44200.3 1606.28   1
  -1  -1  16 43207.8 1367.99  22
   1   1 -16 41512.3 1431.44  15
  -1  -1  16 40725.4 1618.48  14
   1   1 -16 42694.3 1616.63   4
   1  -1 -16 42831.4 1435.08  12
  -1   1  16 43723.8 1290.01  19
  -1   1  16 41552.6 1464.05   1
  -1   1  16 45323.6 1365.46  23
   1  -1 -16 43812.6 1706.23  17
  -1   1  16 39581.8 1563.76  14
   1  -1 -16 47597.5 1348.17  27
  -1   1  16 39849.6 1416.05  22
   1   1 -15 26.8481 111.134  15
  -1  -1  15 22.1942 134.814   1
   1  -1 -15 96.0571 138.507  20
  -1  -1  15 199.471 115.978  21
   1  -1 -15 244.366 194.997  17
  -1   1  15 90.9903 79.1843  19
   1   1 -15 19.4427 124.842   4
   1   1 -15 124.682 151.260  17
  -1   1  15 187.868 101.261  21
  -1   1  15 437.253 136.014  23
  -1   1  15 36.9319 112.217   1
  -1   1  15 258.889 111.882  18
  -1   1  15-103.619 181.339  14
   1  -1 -15-27.5487 108.519  15
  -1  -1  15 70.9080 170.185  14
   1   1 -15 80.1997 95.7685  27
   1  -1 -15 47.9346 129.211  24
  -1  -1  15 151.726 76.2473  23
   1  -1 -15 214.975 138.366  12
  -1  -1  15 273.674 115.312  22
   1  -1 -15 67.7241 143.020   4
  -1  -1  15 20.7785 94.3154  16
   1  -1 -15 133.576 97.7480  27
  -1   1  15 397.644 161.917  22
  -1   1  14 1908.71 266.336   1
  -1   1  14 1684.17 275.946  14
   1  -1 -14 1287.13 270.151   4
  -1   1  14 2224.27 236.857  18
  -1  -1  14 1257.54 258.030  14
  -1   1  14 1906.87 214.767  21
   1  -1 -14 1713.65 304.544  17
   1  -1 -14 1895.27 247.383  15
   1   1 -14 1280.60 215.413  15
   1   1 -14 1450.07 266.097   2
   1   1 -14 1747.53 294.525  17
   1  -1 -14 1621.18 239.273  12
   1  -1 -14 1764.74 281.225  20
  -1  -1  14 2096.37 262.290  16
  -1   1  14 2232.09 232.222  19
  -1  -1  14 1038.91 228.215   1
   1  -1 -14 2075.60 231.570  27
  -1   1  14 1162.66 213.796  22
   1   1 -14 1938.05 244.598  27
  -1  -1  14 2036.72 253.406  21
  -1  -1  14 1917.00 233.144  22
   1  -1 -14 1485.93 234.548  24
   1   1 -14 1690.00 279.852   4
  -1  -1  14 1526.11 179.961  23
  -1   1  14 1757.49 225.666  23
   1   1 -13 2174.68 315.613  17
  -1   1  13 1800.87 203.865  19
   1  -1 -13 2081.19 253.148  12
  -1   1  13 2078.84 266.576   1
  -1   1  13 1601.75 211.644  23
   1   1 -13 1685.35 209.888  27
  -1  -1  13 2109.63 250.596  16
   1  -1 -13 1552.88 195.736  27
  -1  -1  13 1689.80 279.474  14
   1  -1 -13 2084.25 282.962  20
  -1  -1  13 1687.17 162.140   3
   1  -1 -13 1678.79 221.368  15
   1   1 -13 1807.79 180.555  11
   1  -1 -13 1960.43 305.038  17
  -1  -1  13 1507.39 217.827  21
   1   1 -13 1890.02 280.137   2
  -1  -1  13 2020.71 233.483  22
   1   1 -13 2037.87 249.607  15
  -1   1  13 1666.32 195.913  21
  -1  -1  13 1983.57 198.990  23
   1  -1 -13 1726.94 231.418  24
   1  -1 -13 2136.49 318.191   4
  -1   1  13 1607.92 198.334  18
   1   1 -13 1795.07 275.474   4
  -1  -1  13 1837.40 273.434   1
  -1   1  13 2213.91 302.733  14
   1   1 -12 54274.5 1386.47  27
   1  -1 -12 51497.2 1629.87  17
  -1   1  12 50809.2 1295.84  19
  -1   1  12 55016.7 1405.22  23
   1  -1 -12 54970.7 1344.43  27
   1   1 -12 55777.1 1241.33  11
  -1  -1  12 52006.6 1202.15   3
   1  -1 -12 53591.7 1656.84   4
   1  -1 -12 51210.8 1410.41  24
  -1  -1  12 53656.8 1261.00  23
  -1  -1  12 53288.4 1377.10  22
   1  -1 -12 51054.6 1433.49  12
   1   1 -12 54296.0 1637.19  17
  -1   1  12 53720.8 1329.87  18
  -1  -1  12 50205.7 1395.48  21
   1  -1 -12 46605.9 1350.69  15
   1   1 -12 52678.9 1440.61  15
   1   1 -12 52751.3 1574.75   2
  -1   1  12 52420.5 1569.82  14
   1  -1 -12 53452.9 1522.14  20
  -1   1  12 51483.9 1455.67   1
   1   1 -12 54196.7 1597.10   4
  -1  -1  12 52004.6 1413.21  16
  -1  -1  11 26859.5 891.326  21
   1   1 -11 26695.9 1037.33  17
   1  -1 -11 28822.2 933.694  12
   1   1 -11 28662.4 881.656  27
  -1   1  11 26695.9 921.641   1
  -1  -1  11 27909.0 778.726  23
  -1   1  11 26695.8 811.609  19
   1  -1 -11 27133.1 1057.25   4
  -1   1  11 27750.6 884.664  23
   1   1 -11 28868.6 756.780  11
   1   1 -11 27885.5 1022.25   2
  -1  -1  11 27271.0 750.982   3
   1  -1 -11 28242.0 889.031  15
   1  -1 -11 28677.3 978.894  20
   1  -1 -11 28939.4 846.699  27
  -1  -1  11 26467.7 853.829  22
   1   1 -11 28118.5 1026.52   4
   1  -1 -11 27571.1 1063.22  17
  -1  -1  11 27167.6 900.247  16
   1  -1 -11 26826.8 896.805  24
   1   1 -11 27067.4 909.179  15
   1  -1 -10 131162. 2662.14  15
   1  -1 -10 134230. 2764.93   2
   1  -1 -10 132915. 2956.02   4
  -1   1  10 131981. 2741.81   1
  -1  -1  10 133770. 2710.65  16
   1  -1 -10 135805. 2623.33  27
   1  -1 -10 130975. 2722.95  12
   1  -1 -10 135772. 2709.22  24
   1   1 -10 134077. 2672.11  27
   1  -1 -10 132920. 2786.62  20
   1   1 -10 137518. 2898.13   2
   1   1 -10 139275. 2495.17  11
   1  -1 -10 132443. 2650.15  11
  -1   1  10 129089. 2583.54  19
   1  -1 -10 137307. 2962.04  17
  -1  -1  10 134601. 2534.23  23
   1   1 -10 132017. 2720.90  15
   1   1 -10 132262. 2909.66  17
   1   1 -10 133525. 2872.15   4
  -1  -1  10 135034. 2527.79   3
  -1  -1  10 132594. 2696.85  21
  -1  -1  10 137109. 2661.04  22
   1  -1  -9 40518.0 1074.50  12
   1  -1  -9 37156.5 1003.15  15
  -1  -1   9 41452.5 1024.09  22
   1   1  -9 40280.0 1167.74   4
  -1  -1   9 39939.5 938.163   3
   1   1  -9 38977.8 1177.57  17
   1   1  -9 41066.1 888.268  11
  -1   1   9 39436.8 1069.82   1
   1   1  -9 38279.9 1051.24  15
   1  -1  -9 38982.7 1193.86  17
  -1  -1   9 38879.1 921.278  23
   1  -1  -9 40366.6 1223.14   4
  -1   1   9 37756.5 962.909  19
   1   1  -9 39670.1 1170.74   2
   1  -1  -9 40359.9 1099.17  20
  -1  -1   9 37007.3 1029.50  21
   1   1  -9 39562.4 1030.49  27
   1  -1  -9 39587.3 1083.54   2
   1  -1  -9 39322.0 1055.47   8
   1  -1  -9 38940.1 1044.42  24
   1  -1  -9 38597.9 982.382  27
  -1  -1   9 39051.7 1048.81  16
   1  -1  -9 37962.7 1001.93  11
   1  -1  -8 25578.1 874.488  17
   1   1  -8 26949.7 763.961  27
   1   1  -8 27434.2 878.071   2
   1  -1  -8 26222.7 895.369   4
   1  -1  -8 25634.4 736.200  15
   1  -1  -8 26610.4 725.443  27
   1   1  -8 27115.0 861.742   4
  -1  -1   8 26377.2 689.245   3
   1  -1  -8 25447.3 738.724  11
  -1   1   8 26151.2 708.017  19
  -1  -1   8 25439.1 727.714  22
   1  -1  -8 26452.3 792.485   2
  -1  -1   8 25416.5 663.396  23
   1  -1  -8 26517.4 785.885  12
   1  -1  -8 26067.3 767.877  24
   1   1  -8 27159.2 629.397  11
   1   1  -8 26143.7 778.512  15
   1  -1  -8 27088.7 780.410   8
  -1   1   8 26878.8 786.069   1
   1   1  -8 26446.0 874.000  17
  -1  -1   8 25646.8 767.726  21
  -1  -1   8 26272.2 771.776  16
   1  -1  -8 26592.4 798.177  20
   1   1  -7 386.077 81.4479  24
  -1  -1   7 242.448 66.8630  16
   1   1  -7 314.421 49.6022  11
   1   1  -7 288.179 79.2354  15
   1  -1  -7 246.779 70.4899  12
  -1  -1   7 353.597 73.4871  22
   1  -1  -7 392.136 80.9264  15
   1  -1  -7 376.408 80.9074   8
   1  -1  -7 311.152 71.1054  11
  -1  -1   7 677.699 90.0419   3
  -1  -1   7 259.191 56.2530  23
   1  -1  -7 200.345 65.3986  20
   1   1  -7 245.845 91.6400   4
   1  -1  -7 186.631 74.2274   2
  -1   1   7 611.040 96.4731   1
   1   1  -7 265.627 79.1977  27
   1  -1  -7 220.499 63.2884  27
   1  -1  -7 298.248 101.875  17
  -1  -1   7 206.671 70.5865  21
   1  -1  -7 275.413 77.4118  24
   1  -1  -7 479.865 117.944   4
  -1   1   7 315.894 64.1495  19
   1   1  -7 274.980 92.6849   2
   1   1  -7 440.669 106.131  17
   1   1  -6 14491.9 474.902  27
  -1  -1   6 14470.0 404.909  23
   1  -1  -6 15330.3 497.650  12
   1  -1  -6 14893.4 480.591  24
  -1   1   6 14260.2 446.013  18
   1  -1  -6 13901.0 534.707  17
  -1   1   6 15125.8 342.152  29
   1  -1  -6 14876.3 565.391   4
   1  -1  -6 14587.0 447.316  15
   1   1  -6 15096.2 531.022   4
   1   1  -6 15170.1 365.336  11
   1  -1  -6 14795.2 477.628  20
   1  -1  -6 14340.1 476.205   2
   1   1  -6 15359.1 321.088   9
  -1   1   6 14036.5 433.305  19
   1   1  -6 14085.7 529.283   2
   1   1  -6 14352.4 533.987  17
  -1  -1   6 14466.1 444.281   3
   1   1  -6 15110.2 491.783  15
  -1  -1   6 14145.3 480.469  21
  -1  -1   6 14034.8 442.460  22
  -1   1   6 15140.1 477.541   1
   1  -1  -6 14085.8 470.695   8
  -1  -1   6 13923.5 472.231  16
   1  -1  -6 14556.2 445.823  27
   1  -1  -5 36357.9 917.501  17
  -1  -1   5 36258.1 823.281   3
   1  -1  -5 36237.5 941.076   4
   1   1  -5 37469.9 705.753  11
   1   1  -5 37558.5 678.062   9
   1   1  -5 37459.2 865.601  15
  -1  -1   5 36613.6 809.602  22
  -1  -1   5 35226.3 844.060  16
   1  -1  -5 35984.5 811.879  27
   1  -1  -5 38007.5 873.549  12
   1   1  -5 36357.7 918.216   2
   1   1  -5 36275.8 852.832  27
   1   1  -5 37057.5 913.476  17
  -1  -1   5 36422.6 765.198  23
  -1   1   5 37174.5 823.106  18
  -1   1   5 36019.6 804.981  19
  -1  -1   5 36524.5 864.307  21
   1   1  -5 39071.0 907.437   4
   1  -1  -5 38511.3 837.302  20
   1  -1  -5 36022.7 843.547  24
  -1   1   5 37982.2 698.464  29
  -1   1   5 38012.9 832.748   1
   1  -1  -5 36563.2 841.303   8
   1  -1  -5 36828.9 808.723  15
  -1   1   4 337845. 5630.22   1
  -1  -1   4 330847. 5670.58   3
   1  -1  -4 338501. 5680.06  24
   1   1  -4 328094. 5748.14   2
  -1  -1   4 337555. 5713.96  21
  -1  -1   4 359866. 5601.77  23
   1   1  -4 328203. 5658.86  29
   1  -1  -4 320965. 5728.96  17
  -1   1   4 320384. 5658.55  18
   1  -1  -4 328138. 5697.88  12
   1  -1  -4 337608. 5628.26  20
   1   1  -4 361087. 5520.99  11
  -1   1   4 349340. 5531.17  29
   1   1  -4 343996. 5699.37  27
   1   1  -4 354420. 5521.72   9
  -1  -1   4 353582. 5641.94  22
  -1   1   4 331751. 5638.64  19
  -1  -1   4 338971. 5688.32  16
   1  -1  -4 314533. 5760.76   4
   1   1  -4 358168. 5716.34  15
   1  -1  -4 347808. 5627.97  15
   1  -1  -4 338573. 5649.89  27
   1   1  -4 333816. 5706.41   4
   1  -1  -4 350806. 5674.48   8
   1   1  -4 352813. 5653.94  25
   1   1  -4 326921. 5729.15  17
  -1   1   4 309111. 5686.54  14
  -1  -1   3 139806. 2486.05   3
   1  -1  -3 140521. 2501.63  12
   1  -1  -3 138282. 2497.11  17
  -1   1   3 141395. 2471.68  14
  -1  -1   3 139327. 2516.83  21
   1  -1  -3 146617. 2406.23  20
  -1   1   3 141478. 2381.40  29
   1   1  -3 134326. 2486.78  29
   1   1  -3 140143. 2494.44  17
  -1  -1   3 139329. 2482.98  16
   1   1  -3 147755. 2481.24   4
   1   1  -3 140462. 2495.57  27
   1   1  -3 146814. 2369.88  18
  -1  -1   3 147544. 2443.98  22
  -1  -1   3 144915. 2418.41  23
   1  -1  -3 142828. 2461.78  27
   1   1  -3 146499. 2451.13  25
  -1   1   3 131387. 2474.05  18
   1  -1  -3 141692. 2458.88   8
   1  -1  -3 140690. 2534.92   4
   1   1  -3 148366. 2379.45   9
  -1   1   3 147572. 2415.33   1
   1  -1  -3 141612. 2407.59  10
   1   1  -3 147198. 2510.29  15
   1  -1  -3 142247. 2478.74  24
   1   1  -3 139073. 2516.30   2
  -1   1   3 141023. 2454.73  19
  -1   1   2 113547. 1994.74  19
   1  -1  -2 115770. 1934.55  10
   1  -1  -2 113723. 2005.19  24
  -1  -1   2 114265. 1972.26  22
   1   1  -2 115667. 1956.82  18
   1   1  -2 115022. 1948.60   9
  -1   1   2 110709. 2000.39   5
  -1   1   2 114689. 1966.90  14
  -1  -1   2 109677. 2003.99  16
   1   1  -2 113538. 2047.71  13
  -1  -1   2 113583. 1964.01  23
   1  -1  -2 114958. 1985.37  17
   1   1  -2 113310. 2004.67   6
   1  -1  -2 113477. 2012.33   4
   1  -1  -2 108614. 2008.06  28
  -1  -1   2 116309. 2051.12  21
   1   1  -2 119493. 1988.16  17
   1  -1  -2 116720. 1968.44   8
  -1   1   2 115956. 1914.09   1
   1   1  -2 110171. 2009.11  27
  -1   1   2 110860. 2032.94  18
  -1   1   2 114276. 1962.81  29
  -1  -1   2 115641. 2011.54   1
  -1  -1   2 117607. 1993.37  14
  -1  -1   2 114208. 2015.73   3
   1   1  -2 118283. 1980.05  25
   1  -1  -2 111365. 2031.82  12
   1   1  -2 114535. 2006.46   2
   1   1  -2 111073. 2032.24  29
  -1  -1   1 56401.8 466.526   1
   1   1  -1 53637.9 491.134  18
   1  -1  -1 45573.4 410.595   4
   1  -1  -1 61267.6 492.202   8
  -1   1   1 56183.7 569.569  19
   1  -1  -1 55956.5 476.462  21
  -1   1   1 57944.0 420.376   2
   1   1  -1 55077.2 555.803   6
   1   1  -1 26641.0 402.761  29
  -1  -1   1 54312.8 589.148  21
   1   1  -1 55703.2 539.540  25
   1  -1  -1 54990.5 569.666  26
  -1  -1   1 55498.0 542.106   3
  -1   1   1 53031.5 567.651   5
   1  -1  -1 56120.5 483.276  10
  -1   1   1 56111.4 562.548   6
   1  -1   0 65543.1 603.230  21
   1   1   0 64446.4 661.245   6
  -1   1   0 63993.2 633.649   6
  -1  -1   0 37961.4 532.026  16
  -1   1   0 36836.3 509.828  18
  -1  -1   0 64450.3 591.999  21
  -1  -1   0 64627.0 564.316   3
  -1   1   0 67005.3 525.747  20
  -1  -1   0 58977.8 547.370  12
   1   1   0 63543.9 578.620  19
   1   1   0 48802.1 542.698  18
  -1   1   0 67533.2 601.497   2
   1  -1   0 65265.3 664.487   3
  -1  -1   0 66451.0 515.366  24
   1   1   0 64472.0 674.908  25
  -1   1   0 62760.4 673.364  19
   1  -1   0 67158.5 565.509  26
  -1  -1  -1 6901.80 212.086  20
   1   1   1 6312.15 211.403   5
  -1  -1  -1 6684.72 213.707  17
  -1  -1  -1 7565.41 244.732   4
  -1   1  -1 6770.03 239.307   2
  -1   1  -1 6711.34 212.743  18
  -1   1  -1 7201.48 184.236   4
   1   1   1 6570.80 230.811   6
   1  -1   1 7922.22 183.363  26
  -1   1  -1 6801.19 218.584  15
  -1  -1  -1 6841.59 229.599   8
  -1   1  -1 6564.43 212.571  17
  -1  -1  -1 6459.53 226.723  11
  -1  -1  -1 6816.57 177.977   3
   1  -1   1 6799.80 246.458   3
  -1  -1  -1 6992.25 227.695  12
  -1   1  -1 6812.64 236.658  19
  -1  -1  -1 6699.79 203.129  24
   1   1   1 6977.22 200.115  19
   1  -1   1 6728.98 222.398  16
   1  -1   1 6776.60 228.320  21
   1   1   1 7112.33 212.556  29
  -1   1  -1 6762.69 211.061   6
  -1   1  -1 6767.45 221.400  20
   1   1   1 6917.95 189.990  13
  -1   1  -2 209461. 3676.81  20
  -1  -1  -2 205377. 3663.80  11
  -1  -1  -2 213230. 3672.65  12
  -1   1  -2 224614. 3602.23  11
   1  -1   2 224377. 3586.04   7
   1   1   2 215037. 3564.91  19
  -1  -1  -2 221936. 3642.10  20
   1  -1   2 214361. 3672.86  21
  -1   1  -2 221586. 3618.61  18
  -1   1  -2 210816. 3673.96  17
   1   1   2 211540. 3597.62  29
  -1  -1  -2 209345. 3673.44  17
  -1   1  -2 227791. 3627.02   4
  -1   1  -2 221042. 3612.38   6
  -1   1  -2 216996. 3721.97   2
   1  -1   2 217010. 3694.26   3
  -1  -1  -2 219633. 3634.09  24
   1  -1   2 228789. 3544.11  26
  -1  -1  -2 222242. 3669.48   8
   1  -1   2 233723. 3541.10  22
  -1  -1  -2 207539. 3705.70   4
  -1   1  -2 222309. 3666.68  15
  -1  -1  -2 218462. 3591.74   2
   1   1   2 214080. 3562.85  13
   1  -1   2 214290. 3631.53  16
  -1   1  -3 15936.4 486.355  20
  -1  -1  -3 16216.0 489.963  17
  -1   1  -3 16556.9 466.745  15
  -1  -1  -3 16575.0 435.286   2
   1  -1   3 15997.7 433.143  16
   1  -1   3 16603.0 383.581  22
  -1  -1  -3 18853.7 485.295   8
   1  -1   3 16765.9 333.642  23
   1  -1   3 17226.7 370.379  26
  -1   1  -3 17148.6 461.642   4
  -1  -1  -3 17370.5 483.267  12
  -1  -1  -3 17532.4 462.192  20
  -1  -1  -3 15877.2 442.485  24
  -1   1  -3 15705.5 503.387   2
  -1   1  -3 16073.8 442.985  27
  -1  -1  -3 16327.6 388.119  27
   1  -1   3 15614.9 462.200  21
  -1  -1  -3 16487.2 513.861   4
   1   1   3 16617.9 383.833  19
  -1  -1  -3 17664.2 475.068  11
  -1   1  -3 16008.7 403.008  11
   1  -1   3 16974.8 473.993   3
  -1   1  -3 18129.9 509.895  17
  -1  -1  -4 309977. 5657.52  17
   1   1   4 340761. 5457.88  19
   1  -1   4 347975. 5396.80  23
  -1  -1  -4 324264. 5587.99  20
   1  -1   4 344478. 5483.05  22
  -1  -1  -4 326701. 5565.86   2
  -1  -1  -4 326240. 5568.51  24
  -1   1  -4 337480. 5490.75  11
   1  -1   4 326394. 5576.19   3
  -1  -1  -4 328860. 5619.90  12
  -1   1  -4 332012. 5618.38   4
  -1  -1  -4 342810. 5468.53  27
  -1   1  -4 338418. 5615.07  15
  -1  -1  -4 338868. 5583.42  15
   1  -1   4 330437. 5547.74  16
  -1   1  -4 327500. 5653.00  20
  -1  -1  -4 318380. 5580.10  11
  -1   1  -4 319278. 5665.99  17
  -1   1  -4 323247. 5695.68   2
   1  -1   4 332673. 5604.74  21
  -1  -1  -4 347538. 5608.68   8
  -1   1  -4 338909. 5557.64  27
  -1  -1  -4 318268. 5705.14   4
  -1  -1  -5 26236.7 688.418  15
   1  -1   5 25852.1 663.664  16
  -1  -1  -5 26346.2 713.076  20
   1  -1   5 24965.5 694.836  21
  -1   1  -5 25796.4 708.148  15
  -1  -1  -5 25105.6 681.257  24
  -1   1  -5 25934.3 776.356   2
   1  -1   5 26882.8 552.609  23
   1  -1   5 25465.9 670.691   3
  -1   1  -5 27487.9 745.153   4
  -1   1  -5 26354.5 773.418  17
  -1  -1  -5 27079.6 715.399   8
  -1   1  -5 25583.2 615.153  11
  -1  -1  -5 26167.7 698.891   2
  -1   1  -5 24542.1 740.170  20
  -1  -1  -5 24910.1 708.676  12
  -1  -1  -5 26852.0 800.426   4
  -1   1  -5 25720.7 659.660  27
   1  -1   5 25376.1 620.073  22
  -1  -1  -5 25889.0 774.201  17
  -1  -1  -5 25561.7 689.086  11
   1   1   5 23976.0 583.966  19
  -1  -1  -5 25967.1 601.029  27
  -1  -1  -6 528.117 93.8401  24
  -1   1  -6 304.000 93.4019   2
   1  -1   6 400.113 54.0969  23
   1  -1   6 518.862 91.4640  16
  -1   1  -6 428.674 84.3774  27
  -1   1  -6 463.806 93.7953  15
  -1  -1  -6 542.929 103.437  20
   1  -1   6 367.541 81.7197  21
  -1  -1  -6 511.584 98.0276  12
  -1  -1  -6 432.565 107.152  17
  -1  -1  -6 534.345 72.3591  27
   1  -1   6 640.207 85.6572  22
  -1   1  -6 346.009 90.7250   4
  -1  -1  -6 481.469 96.7387  11
  -1   1  -6 437.100 68.8362  11
  -1  -1  -6 463.397 98.7145   8
  -1   1  -6 570.640 124.200  17
  -1  -1  -6 507.668 99.2068   2
  -1   1  -6 482.852 110.303  20
  -1  -1  -6 481.310 119.504   4
   1  -1   6 609.674 91.0096   3
   1   1   6 468.410 67.7825  19
  -1  -1  -6 421.811 83.2692  15
   1  -1   7 4865.97 277.143  16
   1  -1   7 5140.30 218.657  23
  -1   1  -7 4702.27 339.445  17
   1  -1   7 5299.90 267.783   3
  -1  -1  -7 4974.74 350.249  17
  -1   1  -7 5434.02 282.528  27
   1   1   7 4721.37 230.612  19
  -1  -1  -7 5288.63 249.296  27
  -1  -1  -7 5174.61 294.824  11
  -1   1  -7 4774.42 244.253  11
   1  -1   7 4658.78 254.258  22
  -1   1  -7 4824.07 339.703   2
  -1  -1  -7 5402.10 324.268  20
  -1  -1  -7 5390.35 318.815   2
  -1  -1  -7 5119.35 314.874  12
  -1  -1  -7 4848.75 355.301   4
  -1   1  -7 5172.79 312.308  15
   1  -1   7 4699.89 289.546  21
  -1  -1  -7 5040.50 302.358   8
  -1  -1  -7 5182.76 299.522  15
  -1  -1  -7 5140.43 298.046  24
  -1   1  -7 4965.27 331.399   4
  -1   1  -7 4683.48 327.585  20
  -1   1  -8 70105.4 1722.21  17
   1  -1   8 70459.9 1525.46  16
   1   1   8 66496.5 1391.54  19
  -1  -1  -8 69767.4 1561.58  24
  -1   1  -8 66871.3 1574.22  15
  -1  -1  -8 69520.5 1749.35   4
   1  -1   8 67486.8 1347.03  23
  -1  -1  -8 67068.0 1716.54  17
  -1   1  -8 69526.2 1429.90  11
  -1   1  -8 66777.6 1651.58   4
  -1   1  -8 68062.8 1665.42  20
  -1  -1  -8 69319.0 1620.18  20
  -1  -1  -8 65896.8 1559.12   8
  -1   1  -8 70325.7 1490.86  27
  -1   1  -8 68329.4 1702.31   2
   1  -1   8 67373.7 1423.63   3
  -1  -1  -8 66481.4 1524.41  11
  -1  -1  -8 66338.3 1406.44  27
   1  -1   8 66323.5 1545.85  21
   1  -1   8 65320.1 1456.75  22
  -1  -1  -8 64657.2 1530.35  15
  -1  -1  -8 64804.9 1576.73  12
  -1  -1  -8 70601.4 1604.91   2
  -1  -1  -9 59507.3 1492.24  12
  -1   1  -9 59299.2 1573.57  20
  -1  -1  -9 59619.8 1649.70   4
  -1   1  -9 59478.7 1571.13   4
  -1   1  -9 59168.1 1621.34  17
  -1  -1  -9 60518.9 1481.59   8
  -1  -1  -9 57929.0 1418.15  11
  -1  -1  -9 58726.9 1304.79  27
  -1   1  -9 61038.8 1330.57  11
   1  -1   9 58873.3 1454.61  21
  -1   1  -9 57375.1 1471.84  15
  -1  -1  -9 57779.4 1443.93  15
   1   1   9 56100.6 1280.06  19
  -1   1  -9 60383.4 1379.65  27
  -1  -1  -9 59375.2 1528.56  20
  -1  -1  -9 59525.5 1497.99   2
   1  -1   9 59131.0 1244.75  23
  -1   1  -9 62481.9 1630.46   2
  -1  -1  -9 60117.2 1455.33  24
  -1  -1  -9 61786.0 1655.33  17
   1  -1   9 60061.9 1295.14   3
   1  -1   9 57871.8 1364.78  22
   1  -1   9 59094.0 1411.30  16
   1  -1  10 98947.7 1939.01   3
  -1  -1 -10 98945.6 2398.46  17
   1  -1  10 96314.0 2108.01  16
  -1  -1 -10 94155.6 2238.57  20
  -1  -1 -10 95435.6 2147.24  24
  -1   1 -10 99588.8 2330.51   4
   1  -1  10 98213.5 1911.44  23
  -1   1 -10 94067.1 2175.09  15
  -1  -1 -10 96073.7 2395.14   4
   1  -1  10 94238.1 2144.40  21
  -1  -1 -10 97768.1 2222.47   2
  -1   1 -10 99903.3 2353.01   2
  -1   1 -10 98468.7 2058.26  27
   1   1  10 95515.8 1956.94  19
  -1   1 -10 98357.5 2381.44  17
  -1  -1 -10 96887.1 2173.62   8
  -1  -1 -10 98590.1 2125.34  11
  -1  -1 -10 99107.0 2209.17  12
  -1   1 -10 97551.8 1998.13  11
   1  -1  10 98032.7 2065.30  22
  -1  -1 -10 97697.5 1985.32  27
  -1  -1 -10 93328.8 2131.35  15
  -1   1 -10 96619.7 2305.67  20
  -1  -1 -11 29183.4 1141.53  17
  -1  -1 -11 28671.9 1043.18  20
  -1   1 -11 28999.8 1079.41   4
   1  -1  11 29062.5 779.397  23
  -1  -1 -11 27767.8 953.351  24
  -1  -1 -11 28105.4 987.509  12
  -1  -1 -11 27617.4 920.318  11
  -1  -1 -11 28259.2 1006.86   2
  -1   1 -11 29165.1 850.249  11
   1  -1  11 28240.6 922.117  16
   1   1  11 28224.9 814.228  19
  -1   1 -11 28232.4 1114.64  17
  -1  -1 -11 28219.4 1128.35   4
  -1   1 -11 28738.4 883.003  27
  -1   1 -11 27946.0 1075.68   2
  -1   1 -11 28474.1 986.350  15
   1  -1  11 26276.8 930.772  21
  -1   1 -11 27861.2 1064.70  20
   1  -1  11 27852.9 881.787  22
   1  -1  11 27747.3 765.371   3
  -1  -1 -11 28308.5 829.701  27
  -1  -1 -11 26772.5 941.067  15
  -1  -1 -12 10576.4 479.930  27
  -1  -1 -12 10703.2 550.523  11
  -1   1 -12 11310.1 702.898  17
  -1   1 -12 10768.3 594.672  15
  -1  -1 -12 10449.3 591.072  12
  -1   1 -12 10998.0 497.657  11
  -1   1 -12 10557.6 650.447   4
   1   1  12 10440.9 469.416  19
  -1  -1 -12 10799.9 703.486   4
  -1  -1 -12 10612.9 698.629  17
   1  -1  12 10960.4 533.634  22
   1   1  12 11315.9 549.809  23
  -1  -1 -12 11697.8 602.860  24
   1  -1  12 11146.2 563.101  16
   1  -1  12 11677.0 459.104  23
   1  -1  12 10738.8 575.415  21
  -1   1 -12 11037.4 522.428  27
  -1  -1 -12 11409.3 652.514  20
   1  -1  12 11033.9 429.674   3
  -1  -1 -12 10952.6 609.820   2
  -1   1 -12 11056.5 668.697  20
  -1  -1 -12 10403.5 568.894  15
  -1   1 -12 10756.2 663.754   2
  -1  -1 -13 1153.22 208.615  12
  -1   1 -13 477.051 163.437   2
  -1  -1 -13 809.339 206.362  20
  -1   1 -13 598.623 205.837  17
   1   1  13 1028.78 149.818  19
  -1  -1 -13 505.447 188.631   4
   1   1  13 903.170 161.753  23
  -1  -1 -13 763.176 136.351  27
  -1  -1 -13 1071.06 208.357  15
  -1   1 -13 929.452 227.879  20
  -1   1 -13 726.376 146.608  27
   1  -1  13 895.379 163.374  22
   1  -1  13 870.200 169.061  16
  -1  -1 -13 699.439 160.189  11
   1  -1  13 1041.56 196.548  21
   1  -1  13 922.910 131.900  23
  -1  -1 -13 1071.64 209.549  24
  -1  -1 -13 909.247 207.925   2
  -1   1 -13 1110.60 233.014   4
  -1   1 -13 752.678 188.615  15
  -1  -1 -13 813.971 238.498  17
  -1   1 -13 806.973 138.253  11
   1   1  14 79.4506 72.0706  19
   1   1  14 232.852 102.066  21
   1  -1  14 138.755 91.9681  21
  -1  -1 -14 97.8380 66.2528  27
  -1   1 -14 340.075 146.601   2
  -1  -1 -14 28.5784 113.132   2
  -1   1 -14-91.5507 149.638   4
  -1  -1 -14-24.2056 129.305  12
  -1  -1 -14 117.535 93.6642  11
  -1  -1 -14 325.377 169.403   4
  -1  -1 -14 126.502 137.574  17
  -1   1 -14 2.83452 133.270  15
   1   1  14 133.295 81.1084  23
  -1  -1 -14 407.041 151.812  24
  -1  -1 -14 12.9152 110.265  15
  -1   1 -14-18.1116 80.5394  11
   1   1  14 127.271 105.043   1
  -1   1 -14 315.362 158.838  17
  -1   1 -14 60.1355 80.5351  27
  -1  -1 -14 42.2167 116.798  20
   1  -1  14 225.641 114.975  22
   1  -1  14 120.501 103.070  16
   1  -1  15 7518.77 496.907  22
   1   1  15 6954.46 545.727   1
  -1   1 -15 7437.45 625.005   4
  -1  -1 -15 7366.61 554.518  24
  -1  -1 -15 8068.85 689.879  17
   1   1  15 7862.54 563.359  22
  -1  -1 -15 7223.13 549.173  12
   1   1  15 8209.29 503.777  23
  -1  -1 -15 7681.61 548.730  15
  -1  -1 -15 8364.71 641.759  20
  -1  -1 -15 8316.72 538.819  11
   1   1  15 8001.10 647.552  14
  -1   1 -15 9050.07 518.541  27
  -1   1 -15 7452.80 557.902  15
  -1  -1 -15 6497.92 619.582   4
   1  -1  15 8107.95 566.063  21
  -1   1 -15 8259.93 658.367   2
  -1   1 -15 7090.80 650.155  17
   1   1  15 7644.50 506.540  21
   1  -1  15 7871.77 529.922  16
   1   1  16 26480.3 1288.00  14
   1   1  16 28910.1 1181.31  22
   1   1  16 30966.6 1079.61  23
  -1  -1 -16 26021.8 1131.22  15
   1  -1  16 27585.8 1347.23  14
  -1   1 -16 29782.1 1347.98   4
   1   1  16 31453.5 1112.41  18
  -1  -1 -16 29093.1 1413.86  17
  -1   1 -16 31086.0 1355.57   2
  -1  -1 -16 30018.1 1424.40   4
   1   1  16 29091.5 1108.27  21
   1  -1  16 31243.8 1218.26  21
   1  -1  16 30716.2 1109.33  22
   1   1  16 27522.9 1198.72   1
  -1  -1 -16 29389.7 1206.00  12
   1  -1  16 31003.3 1158.99  16
  -1   1 -16 30612.8 1427.79  17
  -1   1 -16 27919.0 1195.23  15
  -1  -1 -16 31243.7 1346.55  20
   1  -1  16 28727.3 1309.06   1
   1   1  17 11437.7 732.511  22
  -1   1 -17 11550.1 842.095   4
  -1  -1 -17 10728.3 720.149  15
  -1  -1 -17 11441.7 828.328  20
   1  -1  17 11237.3 817.024   1
   1   1  17 11196.3 839.167  14
   1  -1  17 11348.5 869.839  14
   1  -1  17 12186.0 689.258  22
  -1   1 -17 10980.0 745.854  15
   1  -1  17 12257.8 721.465  16
  -1  -1 -17 11536.2 894.764   4
  -1   1 -17 14531.6 992.637  17
  -1  -1 -17 11085.4 886.962  17
   1  -1  17 12487.6 762.226  21
   1   1  17 11913.9 780.857   1
  -1   1 -17 11187.3 817.377   2
   1  -1  18 8551.89 784.518  14
  -1   1 -18 8750.25 807.029  17
   1   1  18 10310.3 675.733  16
   1   1  18 8819.13 767.125  14
  -1  -1 -18 8213.95 782.622   4
  -1  -1 -18 10390.3 876.367  17
  -1   1 -18 8393.99 677.804  15
   1  -1  18 10601.5 692.371  16
   1   1  18 9877.26 728.331   1
   1   1  18 8933.72 666.732  22
  -1   1 -18 8748.63 766.117   4
   1  -1  18 8139.09 722.888   1
   1  -1  18 10565.6 725.074  21
   1  -1  18 9877.02 635.920  22
  -1  -1 -19 254.281 182.405  17
  -1  -1 -19 372.442 242.113   4
   1   1  19 120.767 177.124  14
  -1   1 -19 728.026 240.238  15
   1  -1  19 1036.74 261.092  21
   1  -1  19 800.863 253.731   1
   1  -1  19 334.861 247.577  14
   1   1  19 316.693 154.873  22
  -1   1 -19 777.132 273.062   4
  -1   1 -19 869.799 291.707  17
   1   1  19 416.413 202.531   1
  -1   1 -20-134.601 179.067  15
  -1   1 -20 193.989 196.242   4
   1   1  20 49.3078 171.715  14
   1   1  20 130.977 171.548   1
   1  -1  20-53.8503 202.391  14
  -1  -1 -20 91.2935 182.303   4
  -1  -1 -20 143.584 212.487  17
   1  -1  20-51.6935 178.722   1
   1   1  20-121.228 131.290  22
  -1   1 -20 135.118 191.374  17
   1   1  21 39.8099 120.990  22
   1   1  21-226.350 256.728  14
   1   1  21 222.375 180.023   1
   1  -1  21 501.082 287.790  14
   1  -1  21 185.490 181.160   1
  -1  -1 -21 432.278 304.640  17
  -1   1 -21 547.877 258.376   4
  -1  -1 -21 18.7572 176.438   4
  -1   1 -21 331.001 271.666  17
  -1   1 -21 297.540 221.566  15
  -1   1 -22 4879.92 579.223  15
   1   1  22 4244.03 620.776  14
  -1  -1 -22 3640.09 596.952   4
   1  -1  22 4416.01 655.145  14
  -1   1 -22 5037.62 656.605   4
  -1   1 -22 5338.64 728.303  17
  -1  -1 -22 4678.38 696.489  17
   1  -1  22 4478.82 598.376   1
   1   1  22 3726.99 526.724   1
   1  -1  23 1333.33 402.349  14
   1   1  23 988.601 338.253  14
   1  -1  23 1203.83 338.676   1
  -1   1 -23 1466.83 430.635  17
  -1   1 -23 1394.13 352.094  15
  -1  -1 -23 1344.86 384.938  17
   1  -1  24 2358.69 455.232   1
  -1   3  24 253.289 238.766  14
   1   3 -24 202.408 196.285  15
   1   3 -24-81.6159 197.113  17
  -1   3  24 170.239 141.719  22
  -1  -3  24 65.1830 170.742   1
   1  -3 -24 427.854 287.210  17
  -1   3  24 432.018 259.863   5
   1  -3 -24 50.0870 213.725   4
  -1  -3  24 128.439 238.860  14
  -1   3  23 3770.26 568.896  14
   1   3 -23 4191.82 564.199  15
  -1   3  23 5237.68 624.433   5
  -1   3  23 4535.28 580.692  22
  -1  -3  23 3757.79 578.439   1
   1  -3 -23 3873.01 624.412   4
   1  -3 -23 4984.26 711.569  17
   1   3 -23 4483.26 639.703  17
  -1  -3  23 3675.57 624.464  14
   1  -3 -22 512.367 195.060  12
   1   3 -22 257.915 214.026  17
   1  -3 -22 567.299 248.371   4
  -1   3  22 172.470 211.850  14
  -1  -3  22 464.216 255.235   1
  -1   3  22 217.958 168.476  22
   1  -3 -22 123.467 207.154  17
   1   3 -22 331.317 172.181  15
  -1   3  22 529.650 244.458   5
  -1  -3  22 339.579 274.141  14
   1  -3 -21 2847.94 424.872  24
  -1  -3  21 2821.59 481.084   1
   1   3 -21 2525.01 422.134   4
  -1  -3  21 2549.96 499.324  14
  -1  -3  21 3327.38 449.704  16
   1  -3 -21 3168.51 463.845  12
   1   3 -21 2292.49 406.794  15
   1  -3 -21 2413.63 464.928  17
  -1   3  21 2568.23 428.882   5
   1  -3 -21 3361.11 558.790   4
  -1   3  21 2528.75 422.728  22
  -1   3  21 1930.87 385.092  14
   1   3 -21 2683.53 470.543  17
  -1   3  20 37.9899 164.477  14
  -1   3  20-55.0898 179.888   5
  -1   3  20 30.0406 113.370  23
   1   3 -20-26.3585 150.074  15
   1  -3 -20 111.276 157.774  12
  -1  -3  20 128.667 173.534  21
   1  -3 -20-190.842 153.992  24
   1  -3 -20 10.4574 209.415  17
  -1  -3  20 125.082 219.185  14
   1   3 -20-45.1088 160.595   4
  -1  -3  20 302.097 169.473  16
  -1   3  20-112.540 165.269  22
   1  -3 -20-22.0500 179.619   4
  -1  -3  20 167.106 206.366   1
   1   3 -20 35.9341 187.499  17
   1  -3 -19 8382.02 810.039   4
  -1  -3  19 8456.94 670.415  16
  -1   3  19 7825.45 628.400  23
   1   3 -19 8925.52 719.855   4
  -1  -3  19 7155.04 743.960  14
   1  -3 -19 8389.77 693.759  12
  -1   3  19 7254.44 677.328  14
   1  -3 -19 8850.68 808.197  17
  -1   3  19 7429.49 655.560   5
  -1  -3  19 8895.09 716.442  21
  -1  -3  19 7555.01 732.115   1
   1   3 -19 9268.64 657.357  27
  -1   3  19 8696.59 727.560  22
   1   3 -19 8744.34 703.220  15
   1   3 -19 7710.33 736.479  17
   1  -3 -19 8948.92 685.581  24
   1   3 -18 534.810 227.262  17
   1  -3 -18 997.571 273.238  24
   1  -3 -18 179.916 190.220   4
  -1   3  18 169.425 129.953  23
  -1  -3  18 1181.24 280.889  21
  -1  -3  18 659.696 196.680  16
  -1  -3  18 552.537 279.379   1
   1   3 -18 708.071 238.606  15
  -1   3  18 452.564 210.135  14
   1   3 -18 405.284 166.007  27
  -1  -3  18 431.743 231.903  14
   1   3 -18 624.199 206.114   4
  -1   3  18 966.428 256.956  22
   1  -3 -18 374.963 187.209  17
  -1   3  18 588.121 233.338   5
   1  -3 -18 636.356 227.288  12
   1  -3 -17 35091.1 1372.23  20
  -1   3  17 31328.0 1224.73  18
   1  -3 -17 30130.2 1248.93  24
  -1  -3  17 31799.9 1282.71  16
   1   3 -17 29444.4 1281.59  15
  -1  -3  17 29431.6 1422.42  14
   1   3 -17 29723.2 1284.06   4
  -1   3  17 31466.8 1161.40   1
   1  -3 -17 29658.0 1463.62   4
  -1   3  17 29418.7 1314.68  14
   1   3 -17 32496.5 1238.96  27
  -1   3  17 32285.9 1284.78  23
   1   3 -17 29629.7 1391.01  17
   1  -3 -17 33742.2 1501.32  17
  -1  -3  17 32191.3 1332.64  21
   1  -3 -17 30236.4 1293.26  12
  -1  -3  17 30120.5 1414.84   1
   1   3 -16 464.767 177.230  15
  -1  -3  16 274.906 157.477  16
   1  -3 -16 30.2552 125.081  24
   1  -3 -16 158.260 156.500  12
   1  -3 -16 168.643 184.250  17
   1   3 -16 61.7466 158.426   2
  -1  -3  16 297.663 166.227  21
   1   3 -16-10.8082 180.053  17
  -1   3  16 161.875 126.521  23
  -1   3  16 227.712 128.014  18
  -1   3  16 339.818 136.606   1
   1   3 -16 373.099 155.266   4
  -1   3  16 201.554 129.360  14
  -1  -3  16 210.736 102.406  22
   1   3 -16 369.275 136.384  27
  -1  -3  16 319.000 195.492   1
  -1  -3  16 178.707 170.387  14
   1  -3 -16 215.724 130.328  20
   1  -3 -16 346.348 203.765   4
  -1  -3  15 14379.9 894.439   1
   1  -3 -15 15845.5 830.145  20
  -1   3  15 17050.8 812.155  18
   1   3 -15 15289.1 900.046  17
   1  -3 -15 14889.5 827.059  12
   1  -3 -15 15337.3 800.066  24
   1   3 -15 14774.1 816.883  15
  -1  -3  15 15822.8 816.301  16
  -1   3  15 16699.7 713.767  19
   1   3 -15 15448.9 827.741   4
   1  -3 -15 16877.5 954.958  17
   1   3 -15 16476.2 954.040   2
  -1  -3  15 16544.3 711.631  22
  -1   3  15 14654.4 824.953  14
   1  -3 -15 14884.0 940.006   4
  -1   3  15 15907.8 729.728   1
  -1  -3  15 15457.4 925.867  14
   1   3 -15 16587.7 808.585  27
  -1  -3  15 17603.5 742.383   3
  -1  -3  15 15385.4 838.131  21
   1  -3 -14 1832.90 267.844   8
   1   3 -14 1977.53 290.166   4
  -1  -3  14 2408.87 251.578  22
  -1   3  14 2056.85 235.897  19
  -1  -3  14 2078.16 328.955   1
   1   3 -14 2004.34 317.938  17
  -1  -3  14 1855.39 282.682  21
  -1  -3  14 2422.43 263.231   3
   1   3 -14 1730.33 272.198  15
   1  -3 -14 2199.97 281.321  24
  -1   3  14 2208.67 310.345  14
  -1  -3  14 2253.04 292.894  16
   1  -3 -14 2376.82 361.530   4
   1  -3 -14 1863.61 278.441  12
   1   3 -14 2023.08 272.142  27
   1   3 -14 2487.14 362.390   2
  -1  -3  14 1623.60 286.598  14
  -1   3  14 2326.09 258.655   1
   1  -3 -14 2246.61 293.757  20
   1  -3 -14 1857.91 316.118  17
  -1   3  14 1969.11 268.153  18
   1  -3 -13 5336.47 482.598  17
  -1   3  13 5365.77 448.521  14
   1  -3 -13 4584.51 401.157   8
  -1  -3  13 5639.15 507.665  14
  -1  -3  13 5582.98 459.751  21
   1   3 -13 5972.18 508.258  17
   1  -3 -13 6235.81 457.731  20
  -1   3  13 5314.46 365.144  19
   1  -3 -13 5390.19 431.704  24
   1   3 -13 5463.42 507.169   2
  -1  -3  13 5755.14 370.588  22
   1   3 -13 5137.91 434.187  15
  -1  -3  13 5719.03 323.259   7
  -1   3  13 6087.66 391.197   1
  -1  -3  13 6090.11 529.005   1
  -1   3  13 5311.52 418.920  18
   1  -3 -13 4601.09 421.822  12
   1  -3 -13 5455.34 521.247   4
   1   3 -13 5682.43 441.697   4
   1   3 -13 5586.58 438.242  27
  -1  -3  13 5559.47 394.082   3
  -1  -3  13 5630.55 442.706  16
  -1   3  12 113.897 82.0141   1
  -1  -3  12 18.3392 105.837  21
   1  -3 -12-33.3465 82.5511  20
  -1  -3  12 20.1346 72.3053  22
   1   3 -12 26.0172 122.215   2
  -1   3  12-1.89338 109.763  14
  -1  -3  12 106.931 73.3258   3
   1  -3 -12 115.306 98.5373   8
   1  -3 -12 216.075 148.721  17
   1   3 -12 5.17226 95.8985   4
   1   3 -12-22.7129 113.844  15
  -1  -3  12 126.521 61.6459  23
   1  -3 -12 200.867 127.461  12
  -1   3  12 25.2637 83.4982  18
  -1   3  12 287.723 103.887  19
   1   3 -12 59.5250 107.803  27
  -1  -3  12 113.980 66.9967   7
  -1  -3  12 28.1181 98.8194  16
   1  -3 -12 74.0960 138.120   4
   1  -3 -12-16.2241 114.401  24
   1   3 -12 37.7117 108.043  17
   1   3 -11 132539. 2841.59  27
  -1  -3  11 130489. 2841.21  16
  -1  -3  11 130903. 2625.57  22
  -1  -3  11 133227. 2487.39   7
  -1   3  11 126955. 2655.87  19
   1  -3 -11 133108. 2784.58  20
   1   3 -11 129359. 3020.23   2
  -1  -3  11 124631. 2880.40  21
   1  -3 -11 130190. 2961.38  17
  -1   3  11 132357. 2824.84  18
  -1   3  11 127938. 2839.28   5
  -1   3  11 125666. 2817.17  14
  -1   3  11 129556. 2625.23   1
   1  -3 -11 130598. 2809.93  24
  -1   3  11 137694. 2481.24  29
  -1  -3  11 137069. 2504.64  23
   1  -3 -11 124487. 2862.52  12
   1  -3 -11 129383. 3045.23   4
  -1  -3  11 127468. 2762.71   3
   1   3 -11 139131. 2458.32  11
   1  -3 -11 125459. 2800.11   8
   1   3 -11 128482. 2873.11  15
   1   3 -11 127626. 2921.69  17
   1   3 -11 133440. 2813.49   4
  -1  -3  10 4024.47 335.882  16
  -1  -3  10 3280.70 318.143  21
   1  -3 -10 3098.79 292.149   8
   1   3 -10 4378.99 355.810  15
   1   3 -10 3570.96 294.597   4
   1  -3 -10 3635.83 335.052  12
  -1   3  10 3456.49 218.365  29
   1  -3 -10 3379.93 330.241  17
  -1   3  10 3140.03 289.067  14
  -1  -3  10 3453.47 249.133  22
  -1  -3  10 3548.70 220.449  23
  -1   3  10 3641.91 310.567  18
   1  -3 -10 3446.29 355.060   4
  -1   3  10 4848.83 313.881  19
  -1   3  10 3345.57 243.426   1
   1   3 -10 3811.12 208.092  11
   1  -3 -10 4540.41 321.533  20
  -1  -3  10 3358.76 294.262   3
   1   3 -10 3819.64 323.516  27
  -1   3  10 3346.47 122.746  13
   1   3 -10 3257.59 314.835  17
  -1  -3  10 3629.65 207.623   7
   1  -3 -10 3270.89 299.564  24
  -1   3  10 3524.82 320.684   5
   1   3 -10 4157.59 379.337   2
   1  -3  -9 76626.6 1976.60   4
   1   3  -9 80647.4 1877.89  27
  -1  -3   9 83392.2 1538.08   7
  -1  -3   9 80867.4 1869.28  16
  -1   3   9 78966.6 1607.23  29
  -1  -3   9 79046.3 1852.42   3
   1  -3  -9 75469.3 1890.27  12
   1  -3  -9 77073.8 1369.46   3
  -1  -3   9 78853.8 1588.13  23
  -1  -3   9 77527.5 1917.02  21
   1   3  -9 77999.2 1973.68   2
   1   3  -9 75835.4 1764.02   4
  -1   3   9 76753.2 1849.73  18
  -1   3   9 80163.0 1867.33   5
   1   3  -9 79067.4 1395.70   9
   1  -3  -9 80682.9 1919.45  17
   1   3  -9 79019.2 1891.27  15
  -1  -3   9 79964.3 1675.23  22
  -1   3   9 80988.6 1645.19   1
   1  -3  -9 77107.1 1825.66  24
  -1   3   9 76029.1 1368.44  13
  -1   3   9 77993.2 1808.81  14
  -1   3   9 80880.6 1740.42  19
   1  -3  -9 83830.2 1771.77  20
   1   3  -9 79758.7 1892.64  17
   1  -3  -9 76311.5 1811.73   8
   1   3  -9 84279.2 1553.99  11
  -1  -3   8 199.832 54.1440  23
  -1   3   8 330.927 74.8941  29
   1   3  -8 207.600 39.2101   9
  -1  -3   8 423.521 122.784  21
   1   3  -8 101.456 53.8153   4
   1   3  -8 182.782 93.9935  27
  -1  -3   8 265.384 51.9447   7
   1  -3  -8 263.791 68.7329  20
  -1   3   8 93.4040 70.4362   5
   1  -3  -8 110.916 100.790   4
  -1   3   8 219.238 31.1856  13
   1  -3  -8 160.560 93.2421  12
   1  -3  -8 217.141 41.0437   3
  -1   3   8 227.162 94.4651  18
   1   3  -8-35.1018 90.1955   2
  -1  -3   8 111.180 80.8252  16
   1   3  -8 260.349 98.0826  15
  -1   3   8 111.176 60.3323  19
   1  -3  -8 166.708 66.9070   8
  -1   3   8 178.495 75.1836  14
  -1  -3   8 267.046 95.6747   3
  -1  -3   8 180.899 65.2997  22
   1   3  -8 219.582 51.3854  11
   1  -3  -8 211.459 85.2725  24
   1  -3  -8 352.385 102.992  17
   1   3  -8 250.031 90.6304  17
  -1   3   8 216.157 60.9923   1
  -1   3   7 4747.02 287.087  14
   1   3  -7 5027.58 343.210  15
  -1  -3   7 4415.61 336.445  21
   1  -3  -7 4852.53 307.586   8
   1   3  -7 5053.19 276.562   4
  -1  -3   7 4526.68 316.689  16
   1   3  -7 4335.03 315.812  27
  -1   3   7 4258.85 274.737  19
  -1  -3   7 4759.15 258.592  22
   1  -3  -7 5066.23 214.868   3
  -1  -3   7 4695.56 178.773   7
   1  -3  -7 4685.55 260.716  20
   1   3  -7 4647.10 199.288   9
  -1   3   7 4269.90 245.781  29
   1   3  -7 4847.16 308.517  17
  -1   3   7 4652.07 156.929  13
  -1   3   7 3950.56 295.298   5
  -1  -3   7 4519.16 323.290   3
   1  -3  -7 4842.22 314.413  17
   1  -3  -7 4103.05 323.888   4
   1   3  -7 4366.90 231.699  18
   1   3  -7 4544.56 213.465  11
   1  -3  -7 4646.98 334.712  12
   1   3  -7 4363.59 259.210  25
  -1   3   7 4526.85 213.764   1
  -1  -3   7 4724.66 233.745  23
   1  -3  -7 4214.92 295.805  24
   1   3  -7 4226.44 330.351   2
  -1   3   6 12301.6 335.610   1
  -1   3   6 11292.7 492.117   5
  -1   3   6 11021.9 418.991  29
  -1  -3   6 11486.2 534.631  21
   1   3  -6 12131.3 415.135   4
   1   3  -6 11986.4 529.085  15
   1  -3  -6 11598.8 398.605  20
   1  -3  -6 11697.4 520.637   4
   1   3  -6 11145.6 359.725   9
   1  -3  -6 11480.2 484.306  24
   1  -3  -6 11326.1 374.360   3
   1  -3  -6 11954.0 478.785   8
   1   3  -6 11378.6 526.177  29
  -1   3   6 11760.0 431.040  14
  -1  -3   6 10748.6 489.325  16
  -1  -3   6 11368.4 390.094  23
   1  -3  -6 11047.6 512.909  12
   1   3  -6 11074.8 416.563  25
  -1   3   6 11212.9 505.438  18
   1   3  -6 11034.3 393.636  18
   1  -3  -6 11815.7 472.012  17
  -1  -3   6 10711.0 504.186   3
  -1   3   6 11120.1 499.746   6
   1   3  -6 10746.2 505.038   2
   1   3  -6 10650.2 494.953  27
  -1  -3   6 11695.5 413.991  22
  -1   3   6 11271.4 299.025  13
  -1   3   6 10437.5 441.218  19
   1   3  -6 11309.2 454.921  17
  -1   3   5 185691. 3646.56  18
   1  -3  -5 207742. 3321.99  10
   1   3  -5 181431. 3622.07  27
   1   3  -5 191087. 3591.94   6
  -1  -3   5 186868. 3617.75  16
  -1   3   5 196812. 3430.84  14
  -1   3   5 187894. 3542.90  19
   1  -3  -5 188420. 3573.06  24
  -1  -3   5 194723. 3447.65  22
   1  -3  -5 197226. 3437.19   3
   1   3  -5 187576. 3616.72   2
   1   3  -5 196263. 3469.86  18
  -1   3   5 190535. 3493.65  29
   1  -3  -5 195266. 3560.32   8
  -1  -3   5 186980. 3652.94   3
  -1   3   5 186634. 3606.63   5
   1  -3  -5 195549. 3503.35  17
   1   3  -5 196763. 3468.55  25
  -1   3   5 198054. 3309.67  13
   1  -3  -5 196738. 3675.14  12
   1  -3  -5 203261. 3384.58  20
  -1  -3   5 191676. 3698.18  21
   1   3  -5 195147. 3675.12  15
   1   3  -5 204099. 3394.15   4
  -1   3   5 188763. 3634.06   6
   1   3  -5 187569. 3679.52  29
   1  -3  -5 198266. 3622.45   4
  -1   3   5 203960. 3257.20   1
   1   3  -5 192091. 3485.94  17
  -1   3   4 17436.4 638.772  18
   1  -3  -4 18068.5 515.348  17
  -1   3   4 17307.5 611.861   5
   1   3  -4 17001.5 645.666  29
   1  -3  -4 18508.5 458.730  20
   1   3  -4 17193.8 528.219  25
   1  -3  -4 18457.0 440.972  10
  -1  -3   4 17550.2 525.226  22
   1   3  -4 19458.7 453.358   4
   1   3  -4 17767.2 503.728  17
   1  -3  -4 18085.7 584.842   4
  -1   3   4 17509.8 590.754  19
  -1   3   4 17644.1 630.192   6
   1   3  -4 17136.1 602.446   6
   1  -3  -4 17177.0 597.834  28
   1  -3  -4 17837.9 597.150  24
  -1   3   4 17398.4 566.238  29
  -1   3   4 18689.7 477.312  14
   1   3  -4 18267.5 570.365  18
   1   3  -4 17942.4 595.281   2
  -1   3   4 17850.1 465.347  13
   1  -3  -4 17829.4 543.574   3
  -1  -3   4 17733.7 656.625  21
   1  -3  -4 18105.9 498.350  21
  -1  -3   4 16868.0 611.978  16
   1  -3  -4 17762.6 641.446  12
  -1  -3   4 16958.3 623.012   3
   1  -3  -4 19202.4 592.806   8
   1  -3  -3 203442. 3445.79  10
   1   3  -3 220122. 3390.23   4
  -1   3   3 193893. 3698.87   5
  -1  -3   3 202106. 3723.52  16
   1   3  -3 201060. 3441.07  17
  -1  -3   3 193764. 3751.21  21
  -1   3   3 203357. 3728.55   6
  -1   3   3 213397. 3347.94   2
  -1  -3   3 195525. 3712.28   3
   1   3  -3 196631. 3656.21  18
  -1   3   3 193349. 3741.22  18
   1  -3  -3 209296. 3455.18  17
   1  -3  -3 203037. 3767.07  12
   1  -3  -3 206859. 3560.80  21
  -1   3   3 199961. 3677.92  19
  -1   3   3 190651. 3635.84  29
  -1  -3   3 206921. 3510.43  14
   1  -3  -3 195529. 3685.64  28
   1  -3  -3 204668. 3578.37   4
   1  -3  -3 201160. 3679.59  24
   1   3  -3 195942. 3685.60   6
   1   3  -3 195254. 3576.18  25
   1  -3  -3 208015. 3638.35   8
   1   3  -3 195256. 3761.11  29
   1  -3  -3 211206. 3423.46  20
   1  -3  -3 197051. 3607.82   3
  -1  -3   3 196937. 3563.75  22
   1   3  -3 195440. 3590.19   2
   1   3  -2 1444.68 159.191   6
   1  -3  -2 1315.19 155.081  28
  -1  -3   2 1239.51 146.779   3
   1   3  -2 1578.01 127.871   2
   1  -3  -2 1462.89 114.313   4
  -1  -3   2 1191.59 149.787  16
  -1   3   2 1315.31 155.969   6
  -1   3   2 1301.05 165.407  18
  -1   3   2 1465.26 156.134  19
   1   3  -2 962.170 136.882  29
  -1  -3   2 1647.85 104.122  14
   1  -3  -2 1198.39 135.105   8
   1   3  -2 1319.61 77.3722  17
  -1   3   2 1473.97 82.7372   2
  -1   3   2 1085.43 137.343  29
   1  -3  -2 1554.93 102.814  20
   1  -3  -2 1479.84 116.909  10
   1   3  -2 1237.95 131.811  25
   1   3  -2 1183.58 143.436  18
   1  -3  -2 1347.43 78.8424  17
   1  -3  -2 1712.15 152.972  21
   1   3  -2 1289.28 148.265  13
   1  -3  -2 1466.68 149.392   3
  -1  -3   2 1267.68 163.070  21
  -1  -3   2 1521.18 141.078  22
   1   3  -1 84054.1 1835.23   6
   1   3  -1 83504.3 1805.52  19
  -1  -3   1 86724.6 1799.13   3
   1   3  -1 81198.5 1798.30  18
  -1  -3   1 82366.5 1822.14  21
   1   3  -1 87479.1 1604.93   2
   1   3  -1 82330.2 1779.90  13
   1   3  -1 84038.2 1836.68  29
  -1   3   1 82781.3 1858.08  18
  -1  -3   1 83425.7 1852.77  16
   1  -3  -1 84465.5 1689.06  10
   1  -3  -1 84847.6 1780.97  21
  -1   3   1 86733.7 1850.85  19
   1   3  -1 89415.4 1784.05  25
  -1   3   1 81850.8 1810.50  29
   1  -3  -1 83514.5 1856.92  16
  -1   3   1 89282.5 1857.92   6
  -1   3   1 92284.6 1590.37   2
   1  -3  -1 86714.0 1802.61   3
  -1   3   1 89166.2 1762.72  25
  -1  -3   1 91231.1 1627.31   1
   1  -3  -1 95539.5 1577.16   4
  -1  -3   0 133.854 74.4546  16
  -1   3   0 304.086 93.3476  29
  -1   3   0 130.364 64.7252  18
   1  -3   0 133.348 71.5728  21
  -1   3   0 242.381 57.1088   2
  -1  -3   0 526.849 94.2991   3
  -1   3   0 215.548 80.9687  19
  -1   3   0 181.947 76.8643   6
   1   3   0 376.419 90.5156  18
   1  -3   0 197.833 86.3532  16
  -1  -3   0 166.107 35.9668   1
   1   3   0 178.326 65.0628  29
   1   3   0 260.607 85.6720   6
   1   3   0 447.816 92.9947  25
  -1  -3   0 111.006 68.9330  12
   1   3   0 157.563 61.6097  13
  -1  -3   0 82.6661 47.7585  21
   1   3   0 722.767 114.627  19
   1  -3   0 92.4135 56.3167   3
  -1   3   0 283.373 76.7934  25
  -1   3  -1 182659. 3498.36  18
   1   3   1 192790. 3522.69  25
  -1  -3  -1 174136. 3524.18  16
  -1  -3  -1 195412. 3438.23  21
  -1  -3  -1 201679. 3197.97  17
   1   3   1 177733. 3453.00  29
  -1  -3  -1 189309. 3413.69   3
  -1  -3  -1 199576. 3361.12  20
  -1   3  -1 182936. 3494.35   6
   1   3   1 181695. 3482.99  18
   1  -3   1 189765. 3541.79   3
  -1   3  -1 181088. 3526.01  29
   1   3   1 186441. 3372.54  13
  -1   3  -1 195829. 3186.77  17
  -1  -3  -1 189356. 3471.32  12
  -1  -3  -1 198917. 3513.64   8
   1   3   1 188009. 3473.48  19
  -1   3  -1 195352. 3378.78   2
  -1   3  -1 198661. 3349.48  25
   1   3   1 185501. 3543.80   6
  -1  -3  -1 189404. 3411.56  24
   1  -3   1 185892. 3537.68  16
   1  -3   1 193781. 3502.82  21
  -1  -3  -1 186222. 3452.05  28
  -1   3  -1 184391. 3536.95  19
   1   3   2 5480.85 297.020  19
   1   3   2 5624.09 319.349  18
  -1  -3  -2 6520.89 292.583  21
  -1   3  -2 5285.07 282.843   2
   1   3   2 5205.43 320.972   6
   1   3   2 5707.10 335.788  25
  -1   3  -2 5257.04 325.969  29
  -1  -3  -2 5667.48 294.229  28
   1  -3   2 5676.37 236.758  26
   1   3   2 5238.67 309.097   5
  -1  -3  -2 6273.36 324.743  12
  -1  -3  -2 5591.51 160.747  10
  -1  -3  -2 5989.35 259.696  20
   1  -3   2 7007.58 354.234  21
  -1   3  -2 6104.75 229.117  17
  -1   3  -2 5508.87 238.774  25
   1   3   2 5552.36 253.503  13
  -1  -3  -2 5973.42 277.423   3
   1   3   2 5074.10 289.057  29
   1  -3   2 5663.61 332.569   3
  -1   3  -2 5323.58 298.543  18
  -1  -3  -2 6452.88 296.764   4
   1  -3   2 5450.81 321.648  16
  -1  -3  -2 5972.77 315.836   8
  -1  -3  -2 5910.26 231.387  17
  -1  -3  -2 5447.71 278.874  24
  -1   3  -2 4907.02 293.595   6
   1   3   3 372539. 6599.78  19
  -1  -3  -3 383638. 6602.88  28
   1  -3   3 374204. 6693.78  16
   1   3   3 371547. 6682.92  18
  -1  -3  -3 380858. 6534.73  21
  -1   3  -3 380114. 6682.79   2
   1  -3   3 393586. 6438.12  22
  -1   3  -3 401040. 6456.40  25
   1  -3   3 392132. 6769.00   3
  -1   3  -3 388596. 6507.17  17
   1   3   3 367310. 6591.33  29
   1   3   3 373121. 6716.60   6
   1   3   3 388715. 6474.57  13
  -1  -3  -3 391236. 6504.93   3
  -1  -3  -3 385856. 6596.97  24
  -1   3  -3 393158. 6626.59  18
  -1  -3  -3 394558. 6664.05   4
  -1   3  -3 415523. 6338.19   4
   1  -3   3 399160. 6734.25  21
  -1   3  -3 395669. 6706.15  15
  -1  -3  -3 392633. 6525.16  20
  -1  -3  -3 398793. 6706.68  12
  -1   3  -3 376444. 6644.06   6
  -1  -3  -3 388836. 6524.28  17
   1  -3   3 406354. 6419.67  26
  -1  -3  -3 412409. 6703.18   8
  -1   3  -3 372792. 6743.45  29
   1   3   3 381933. 6674.44   5
  -1   3  -4 23730.0 778.493   2
  -1  -3  -4 25630.5 678.013  20
  -1  -3  -4 24940.7 759.106   8
  -1  -3  -4 24832.9 776.120   4
   1   3   4 24068.2 768.294  18
  -1  -3  -4 24323.9 714.452  24
  -1  -3  -4 24375.8 699.901  17
  -1   3  -4 25383.4 581.399   4
  -1   3  -4 24028.2 682.341  17
   1  -3   4 23849.5 780.986  21
  -1   3  -4 24591.6 697.496  18
  -1   3  -4 24692.3 606.039  25
   1   3   4 23830.9 777.360   6
   1   3   4 24560.4 695.595  29
   1   3   4 25131.5 509.582   1
   1   3   4 24817.5 604.255  13
   1  -3   4 23014.4 789.995   3
   1   3   4 23470.6 693.283  19
   1   3   4 23372.5 743.381   5
  -1  -3  -4 24786.8 606.520   3
   1  -3   4 25235.9 593.253  22
   1  -3   4 23816.1 758.564  16
   1  -3   4 25560.4 549.001  26
  -1   3  -4 25144.9 780.500  15
  -1  -3  -4 24178.4 772.115  12
  -1   3  -4 24072.8 729.562   6
  -1   3  -5 36596.6 1023.02  15
  -1   3  -5 34239.4 1009.51  27
  -1  -3  -5 36112.9 995.233   8
   1   3   5 35738.9 990.003   5
   1   3   5 34614.7 905.389  19
   1  -3   5 36918.1 803.411  22
  -1   3  -5 37522.0 961.743  17
  -1  -3  -5 37437.2 1055.65   4
   1   3   5 35318.4 1004.87  18
   1  -3   5 34500.0 988.436  16
  -1  -3  -5 36989.2 974.701  17
  -1  -3  -5 37464.7 773.231   3
   1  -3   5 35339.7 1041.78   3
  -1  -3  -5 37239.6 916.518  20
   1  -3   5 37582.7 721.410  26
   1   3   5 35432.1 795.103  13
   1  -3   5 35867.8 1037.41  21
  -1   3  -5 36600.5 870.366  11
  -1  -3  -5 35539.3 1021.29  12
  -1   3  -5 36150.5 830.893  25
  -1   3  -5 37839.4 849.614   4
   1   3   5 35824.8 902.971  29
   1   3   5 35698.4 1017.51   6
  -1  -3  -5 35062.2 946.928  24
  -1   3  -5 34721.3 945.976   6
  -1   3  -5 35434.4 1047.62   2
  -1   3  -5 34051.3 893.089  18
  -1   3  -6 2361.82 235.383  15
   1  -3   6 2348.34 222.328  16
   1   3   6 2353.80 227.687   5
  -1   3  -6 2565.96 191.467   4
  -1   3  -6 2855.57 239.978  17
   1   3   6 2511.05 146.971  13
  -1  -3  -6 2736.31 121.367   3
   1   3   6 2581.37 241.164   6
  -1   3  -6 2792.64 187.562  11
  -1  -3  -6 2640.96 251.682  12
   1   3   6 2550.26 237.667  18
  -1  -3  -6 2781.22 228.913  24
   1  -3   6 2678.41 166.497  22
  -1  -3  -6 2285.89 195.618  20
  -1  -3  -6 2884.32 244.329   8
   1  -3   6 2644.00 115.858  26
   1   3   6 2551.97 199.997  19
  -1  -3  -6 2691.96 241.472  17
  -1  -3  -6 2752.27 266.068   4
   1  -3   6 2654.55 158.435   7
   1   3   6 2615.57 195.786  29
  -1   3  -6 2588.73 258.236   2
   1  -3   6 2284.45 238.934  21
  -1   3  -6 2498.98 240.192  27
   1  -3   6 2761.63 254.470   3
  -1   3  -7 10676.2 565.301   2
   1  -3   7 10397.3 273.420  26
  -1   3  -7 10215.5 439.119   4
  -1  -3  -7 10685.3 523.343  17
   1  -3   7 10109.1 522.115  21
   1   3   7 9948.67 497.385   6
   1  -3   7 10250.8 516.741   3
  -1  -3  -7 10455.5 466.074  20
  -1  -3  -7 9926.14 547.414   4
   1  -3   7 10528.8 497.762  16
   1   3   7 10742.8 334.683  13
  -1   3  -7 10393.0 254.520   9
   1   3   7 10278.5 411.571  29
  -1  -3  -7 9966.49 516.057  12
   1  -3   7 10537.3 366.588   7
   1   3   7 10242.9 503.314  18
  -1   3  -7 10785.5 514.188  17
   1   3   7 9715.04 415.016  19
  -1  -3  -7 10344.2 498.488   8
  -1   3  -7 10595.2 396.712  11
  -1  -3  -7 10019.0 476.789  24
   1   3   7 10134.3 494.497   5
  -1   3  -7 10208.3 511.654  15
  -1   3  -7 10457.8 505.488  27
   1  -3   7 10354.9 371.882  22
  -1  -3  -8 1015.92 177.763  12
  -1   3  -8 1476.38 176.758   4
   1   3   8 873.010 124.711  19
  -1  -3  -8 1170.19 177.384   8
   1  -3   8 1096.38 121.773  22
   1   3   8 970.238 156.049  18
  -1  -3  -8 1578.83 227.638   4
  -1   3  -8 1899.48 246.992   2
  -1   3  -8 1222.09 191.640  15
   1  -3   8 1138.04 173.335  16
   1   3   8 1142.27 134.115  29
  -1  -3  -8 1168.82 167.028  20
   1   3   8 985.547 168.409   5
   1  -3   8 1121.87 174.686   3
   1  -3   8 1117.73 94.8474  23
  -1  -3  -8 1579.83 220.946  17
   1  -3   8 897.870 171.480  21
  -1  -3  -8 1132.76 167.300  24
  -1   3  -8 969.135 119.566  11
   1   3   8 1146.75 130.837   1
  -1   3  -8 1061.56 167.429  27
   1  -3   8 1152.54 80.1771  26
   1  -3   8 949.083 111.474   7
  -1   3  -8 1634.26 209.332  17
   1   3   8 1188.39 103.087  13
  -1  -3  -9 122844. 2663.82  24
   1  -3   9 126037. 2417.82   7
  -1  -3  -9 123852. 2891.72   4
   1  -3   9 121703. 2678.03   3
  -1   3  -9 126247. 2684.74  27
  -1  -3  -9 121609. 2746.26  12
   1   3   9 122179. 2480.42   1
   1  -3   9 126296. 2202.90  26
   1   3   9 123055. 2690.86   5
   1  -3   9 130848. 2273.98  23
   1   3   9 127781. 2289.63  13
  -1  -3  -9 130698. 2680.20  20
  -1  -3  -9 127472. 2810.05  17
   1  -3   9 120099. 2748.68  21
  -1   3  -9 124240. 2770.24  17
  -1   3  -9 131083. 2448.99  11
   1  -3   9 127081. 2684.63  16
  -1   3  -9 125909. 2882.97   2
   1  -3   9 129953. 2438.10  22
   1   3   9 129618. 2454.79  29
  -1   3  -9 126486. 2755.17  15
   1   3   9 120951. 2476.59  19
  -1  -3  -9 122175. 2695.85   8
   1   3   9 127041. 2701.32  18
  -1   3  -9 128208. 2634.08   4
  -1   3 -10 865.847 122.573  11
  -1  -3 -10 1021.86 200.190  12
   1   3  10 930.179 138.586  19
   1   3  10 939.161 182.818  18
   1   3  10 2027.36 179.933  29
   1  -3  10 1116.72 137.947   7
  -1   3 -10 1196.56 221.024  15
   1   3  10 1267.24 210.168   5
  -1   3 -10 1091.42 180.753   4
   1   3  10 1096.90 106.118  13
   1  -3  10 1137.89 196.164  16
  -1   3 -10 1267.53 202.684  27
  -1  -3 -10 1078.77 208.583  17
  -1  -3 -10 1062.66 182.094  20
   1  -3  10 1307.93 214.377  21
   1  -3  10 1313.19 151.278  22
  -1   3 -10 798.846 182.746   2
   1  -3  10 1204.73 108.263  23
   1  -3  10 1217.94 186.381   3
  -1  -3 -10 1179.14 194.728  24
  -1  -3 -10 1032.83 195.091   8
  -1   3 -10 1080.29 209.929  17
   1   3  10 1174.87 156.639   1
  -1  -3 -10 947.075 220.016   4
   1   3  11 60203.5 1455.60  19
  -1   3 -11 58684.2 1692.90  15
   1   3  11 59253.7 1648.04  18
   1   3  11 65646.4 1421.80  29
  -1   3 -11 60718.7 1771.96  17
  -1   3 -11 61848.3 1652.51   4
   1  -3  11 59537.0 1709.41  21
  -1  -3 -11 60035.5 1731.30  12
  -1  -3 -11 62297.3 1819.43  17
   1  -3  11 61048.2 1612.66   3
   1   3  11 61498.0 1515.21   1
  -1  -3 -11 64666.8 1698.41  20
  -1   3 -11 61681.6 1860.66   2
  -1   3 -11 61304.8 1634.64  27
   1  -3  11 64539.4 1451.94  22
  -1   3 -11 62955.4 1424.28  11
  -1  -3 -11 61385.8 1872.26   4
   1  -3  11 62397.6 1659.99  16
  -1  -3 -11 60023.7 1649.91  24
  -1  -3 -11 57156.0 1654.13   8
   1  -3  11 62313.0 1433.90   7
  -1   3 -12 308.559 89.0962  11
   1  -3  12 171.706 87.2061  16
   1  -3  12 270.488 96.8874   7
  -1  -3 -12 224.549 132.180  20
  -1  -3 -12 167.785 153.859  17
   1  -3  12 333.078 91.6892  22
  -1   3 -12 328.993 117.636  27
   1  -3  12 375.521 148.779  21
  -1   3 -12 358.660 174.366  15
   1   3  12 274.191 124.400  14
  -1   3 -12 222.788 163.407   2
  -1  -3 -12 318.882 124.943  24
  -1  -3 -12 312.867 190.881   4
   1   3  12 282.698 91.6372  19
   1   3  12 237.087 118.403  18
   1  -3  12 218.561 98.4683   3
  -1   3 -12 400.807 156.212  17
   1   3  12 231.679 100.893   1
  -1  -3 -12 171.189 133.580  12
  -1   3 -12 284.925 142.790   4
  -1  -3 -12 248.520 135.411   8
   1  -3  13 202.088 71.2875   7
   1   3  13 137.628 109.721  14
  -1  -3 -13 211.884 172.125   4
   1   3  13 310.046 116.852  18
   1  -3  13 84.7314 128.362  21
  -1   3 -13 343.546 170.264  17
  -1   3 -13 359.658 149.311   4
   1  -3  13 302.790 142.957  16
   1  -3  13 125.785 96.3076   3
  -1  -3 -13 152.967 104.313  24
  -1   3 -13 249.307 178.238   2
  -1  -3 -13 137.684 142.467  17
  -1   3 -13 315.323 129.778  27
  -1  -3 -13 320.894 150.195  20
  -1   3 -13 162.904 133.988  15
   1   3  13 164.232 87.3137   1
  -1  -3 -13 186.028 131.341   8
   1  -3  13 201.712 90.1654  22
  -1  -3 -13 171.427 146.552  12
  -1  -3 -14 116.439 173.744   4
   1  -3  14 388.919 161.588  21
  -1   3 -14 425.928 145.462   4
   1   3  14 465.973 140.214   1
   1   3  14 279.096 125.064  14
   1   3  14 371.334 139.754  18
   1  -3  14 383.180 127.174   3
   1  -3  14 481.522 150.471  16
   1  -3  14 499.846 122.902   7
  -1  -3 -14 641.060 194.838   8
  -1   3 -14 438.383 178.682   2
  -1   3 -14 437.343 153.420  27
  -1  -3 -14 225.883 145.053  24
  -1   3 -14 367.363 156.289  15
  -1  -3 -14 510.622 194.911  17
  -1  -3 -14 350.463 157.483  12
  -1   3 -14 202.411 154.548  17
  -1  -3 -14 311.423 134.686  20
   1  -3  14 490.874 124.240  22
  -1   3 -15 10294.3 619.579  27
   1  -3  15 9666.47 637.640  16
  -1   3 -15 9647.00 735.753  17
  -1  -3 -15 9092.08 732.883  17
  -1   3 -15 8875.73 637.104   4
   1   3  15 10306.4 649.700  18
   1   3  15 9553.03 580.953   1
  -1   3 -15 10778.0 789.651   2
   1   3  15 9098.29 668.360  14
  -1  -3 -15 8797.82 622.788  24
   1  -3  15 9291.31 668.871  21
  -1   3 -15 7990.07 622.970  15
  -1  -3 -15 9091.06 669.284  12
  -1  -3 -15 9000.68 753.448   4
  -1  -3 -15 10141.9 693.096  20
   1  -3  16 762.141 243.800  14
   1  -3  16 939.033 233.344  21
  -1   3 -16 465.487 220.720   2
   1   3  16 901.971 232.226   5
  -1  -3 -16 591.492 213.847  24
  -1  -3 -16 1063.86 272.597  12
  -1   3 -16 385.215 187.407  17
  -1  -3 -16 872.096 235.150  20
   1  -3  16 755.761 242.502   1
  -1  -3 -16 407.517 204.963  17
   1   3  16 1089.57 241.618  18
  -1   3 -16 619.791 155.056  27
   1   3  16 351.781 177.215  14
  -1   3 -16 580.976 196.227  15
   1  -3  16 1119.44 228.772  16
  -1  -3 -16 706.562 246.662   4
   1   3  16 909.042 215.758  23
  -1   3 -16 796.127 224.397   4
   1  -3  17 28832.7 1219.67  16
  -1   3 -17 22666.2 1175.15  15
   1   3  17 25865.1 1262.26  14
  -1   3 -17 27782.0 1262.28   4
  -1  -3 -17 26101.0 1245.70  12
   1   3  17 27806.7 1196.28  23
   1  -3  17 26418.5 1388.82  14
  -1  -3 -17 26716.5 1381.99  17
  -1   3 -17 27843.7 1403.44   2
  -1  -3 -17 30302.4 1339.67  20
  -1  -3 -17 27864.1 1445.07   4
   1   3  17 29145.6 1202.91  18
  -1   3 -17 27817.8 1390.74  17
   1  -3  17 28469.2 1289.97  21
  -1  -3 -17 26885.0 1205.68  24
   1  -3  17 26660.2 1380.94   1
   1   3  17 26458.4 1217.50   5
   1  -3  18 191.612 160.931  16
  -1   3 -18 453.899 247.299  17
   1   3  18 71.4642 166.266  14
   1  -3  18 63.2697 181.096   1
   1   3  18-22.1314 135.246  22
   1  -3  18 146.416 143.638  21
  -1   3 -18-126.011 177.872   4
  -1  -3 -18-104.367 174.409  12
  -1  -3 -18 51.0673 174.289  17
   1   3  18 79.7800 141.209  23
   1   3  18 17.0206 148.549   5
  -1  -3 -18-57.7791 162.410   4
  -1  -3 -18 17.1416 133.047  20
  -1   3 -18-76.7818 151.659  15
   1  -3  18-121.583 216.448  14
  -1  -3 -18 75.9407 170.461  24
  -1  -3 -19 1057.69 326.214   4
   1   3  19 715.972 244.630  22
   1   3  19 969.346 244.782   6
  -1  -3 -19 751.223 258.977  12
   1  -3  19 603.710 270.404   1
   1  -3  19 952.477 316.967  14
  -1   3 -19 825.229 263.740  15
  -1  -3 -19 968.608 273.877  24
   1   3  19 1118.13 282.534   5
  -1   3 -19 1371.20 318.690   4
   1  -3  19 1008.84 275.931  21
  -1   3 -19 827.083 304.752  17
   1   3  19 983.025 303.675  14
  -1  -3 -19 807.328 300.925  17
   1  -3  20 382.368 201.239   1
  -1   3 -20 374.379 221.442   4
   1   3  20 670.555 236.917   5
  -1   3 -20-11.4352 201.071  17
   1  -3  20 473.449 240.683  14
  -1  -3 -20 249.256 206.902  17
   1   3  20 450.620 212.717  22
  -1   3 -20 400.840 208.222  15
   1  -3  20 373.958 187.023  21
   1   3  20 343.865 227.131  14
  -1  -3 -20 567.129 264.699   4
  -1  -3 -20 209.440 176.531  12
   1  -3  21 3717.35 618.038  14
   1   3  21 3509.47 497.731  22
  -1  -3 -21 3399.78 565.387  17
  -1   3 -21 3043.01 476.472  15
   1  -3  21 2899.34 505.827   1
  -1   3 -21 4833.60 645.541  17
  -1  -3 -21 4090.88 626.803   4
   1   3  21 3342.86 523.148  14
   1   3  21 4882.37 583.106   5
   1   3  22 464.080 258.213   5
  -1  -3 -22 322.144 244.335   4
  -1  -3 -22 468.206 281.452  17
   1   3  22 234.248 215.807  14
   1  -3  22 531.214 306.844  14
  -1   3 -22 526.181 275.106  17
   1  -3  22 70.1368 191.259   1
  -1   3 -22 104.076 177.728  15
   1   3  22 388.831 214.249  22
   1   3  23 4587.93 595.601  22
  -1   3 -23 4557.18 663.018  17
  -1   3 -23 5215.89 646.714  15
   1  -3  23 4839.26 687.952   1
  -1  -3 -23 6029.76 789.378  17
   1   3  23 5018.20 664.980  14
   1   3  23 6408.38 704.666   5
   1  -5 -23 336.126 247.171  17
  -1   5  23 1428.61 374.225  22
   1  -5 -23 598.177 229.168  12
  -1   5  23 1100.30 324.602   5
  -1  -5  23 959.245 347.114   1
   1   5 -23 985.781 333.455  15
  -1  -5  23 1325.60 428.362  14
   1  -5 -23 1008.44 324.371  24
   1   5 -23 1248.39 349.499  17
   1  -5 -22 1035.35 335.728   4
  -1   5  22 1940.15 406.282   6
  -1  -5  22 553.674 280.370   1
   1  -5 -22 1860.86 387.284  24
  -1  -5  22 1521.61 396.642  14
   1  -5 -22 1480.57 362.279  12
   1   5 -22 1718.15 395.145  17
  -1   5  22 2261.46 447.186  22
   1   5 -22 1159.71 330.185  15
   1  -5 -22 1443.27 392.725  17
  -1   5  22 1496.65 372.320   5
  -1  -5  22 2010.58 431.091  21
   1  -5 -21 1465.11 349.286  24
  -1   5  21 1264.04 344.421  22
  -1   5  21 1387.11 326.630   5
  -1  -5  21 716.903 275.372  21
  -1   5  21 957.652 281.944  23
   1   5 -21 1517.39 370.323  15
  -1  -5  21 1373.87 376.588  14
   1  -5 -21 1192.51 317.396  12
   1  -5 -21 1098.16 321.511  17
  -1  -5  21 1465.03 401.286   1
   1  -5 -21 1493.67 391.877   4
  -1   5  21 1453.61 349.821   6
  -1  -5  21 1072.45 293.313  16
   1   5 -21 1598.75 356.978  17
   1  -5 -20 523.574 209.987  12
  -1   5  20 482.169 210.733  22
  -1   5  20 481.262 214.540   6
   1   5 -20 562.355 205.519  27
  -1  -5  20 528.947 275.004   1
   1   5 -20 836.670 287.262  17
   1  -5 -20 630.502 231.862  24
   1   5 -20 572.667 253.775  15
  -1   5  20-106.554 192.206  23
  -1   5  20 938.062 246.350  14
  -1  -5  20 543.679 233.039  16
  -1  -5  20 523.870 232.290  21
  -1  -5  20 411.812 255.327  14
   1  -5 -20 888.931 327.372   4
   1  -5 -20 556.941 260.170  17
  -1   5  20 639.607 243.970   5
  -1   5  19 4039.45 486.574  14
  -1  -5  19 4517.66 551.391  21
   1   5 -19 4251.56 487.550  27
  -1  -5  19 3503.50 527.678  14
  -1   5  19 5440.62 591.912   6
   1  -5 -19 3007.78 470.424  12
  -1  -5  19 4295.32 522.545  16
   1  -5 -19 4204.48 549.895  17
   1   5 -19 3912.81 518.118  17
   1  -5 -19 3942.91 493.265  24
   1  -5 -19 3934.93 571.267   4
  -1   5  19 4411.14 545.825   5
  -1   5  19 3953.49 513.690  23
  -1  -5  19 4384.75 592.154   1
   1   5 -19 3216.98 489.216  15
   1  -5 -18 5336.37 586.392  12
  -1  -5  18 6183.83 659.804  14
   1   5 -18 5845.88 607.154  15
  -1  -5  18 4998.03 577.036  21
   1  -5 -18 6821.33 664.269  17
   1   5 -18 6862.65 618.319  27
   1  -5 -18 5017.57 538.789  24
  -1   5  18 7090.26 652.687   6
  -1   5  18 5302.74 568.694   5
  -1   5  18 6254.52 625.475  23
   1   5 -18 6257.15 631.717  17
  -1  -5  18 5085.44 621.984   1
  -1  -5  18 6949.41 640.972  16
   1  -5 -18 6665.85 710.403   4
  -1   5  18 6616.95 617.352  18
  -1   5  18 6415.76 586.990  14
   1   5 -17 10259.8 770.134  17
  -1  -5  17 9761.81 767.899  21
  -1   5  17 10070.6 708.633  14
  -1  -5  17 8763.71 758.705  14
  -1  -5  17 10586.9 774.521  16
   1  -5 -17 10051.3 781.914  17
   1  -5 -17 9029.19 750.717  12
   1  -5 -17 8389.81 685.435   8
  -1   5  17 9847.47 740.523  18
   1  -5 -17 9262.84 702.251  24
  -1   5  17 9865.59 748.742   6
   1  -5 -17 8479.71 776.202   4
   1   5 -17 8074.03 714.138  15
  -1   5  17 9188.88 725.343   5
  -1  -5  17 8303.63 763.213   1
   1   5 -17 10016.6 729.268  27
   1   5 -16 2597.51 373.134  27
  -1   5  16 2430.20 372.609   6
  -1   5  16 2792.19 384.087  18
  -1   5  16 2872.18 400.998   5
  -1  -5  16 2842.40 396.771  16
  -1  -5  16 2860.15 430.013  14
   1  -5 -16 1802.44 320.001   8
   1   5 -16 2178.48 346.923  17
  -1  -5  16 2946.64 367.927   3
   1  -5 -16 1945.04 319.014  24
   1  -5 -16 2323.91 389.208   4
   1   5 -16 1699.59 331.660  15
  -1  -5  16 2401.53 399.572   1
  -1   5  16 2437.13 349.174  14
  -1  -5  16 2299.52 380.707  21
   1  -5 -16 2228.46 370.339  12
   1  -5 -16 2204.44 351.926  17
  -1   5  15 300.262 161.367   6
  -1   5  15 194.045 110.155  14
   1  -5 -15 17.9978 131.367  17
   1   5 -15 48.0757 145.865  17
  -1  -5  15 324.158 147.185   3
  -1  -5  15-170.789 228.049   1
   1  -5 -15 9.97960 146.535   4
  -1  -5  15 131.439 136.334  21
   1   5 -15 32.2339 142.377  27
   1  -5 -15 16.4152 159.054  12
  -1  -5  15-71.0769 150.034  14
   1  -5 -15 187.159 147.231   8
   1  -5 -15 101.045 113.999  24
  -1   5  15 164.336 137.820  18
  -1   5  15-61.4591 141.577   5
   1   5 -15 162.237 181.392   2
   1   5 -15 146.245 145.063  15
  -1  -5  15 39.3307 122.244  16
   1  -5 -14 92.8896 124.826   8
   1  -5 -14 236.439 165.637   4
  -1  -5  14 43.0150 130.763  14
  -1  -5  14-112.849 126.960   3
  -1  -5  14-150.722 172.662  16
   1   5 -14-40.4350 157.365   2
  -1   5  14 50.8678 85.6434  19
  -1  -5  14 123.585 167.287  21
  -1   5  14 3.27288 133.807   6
   1  -5 -14-47.5798 132.937  17
   1  -5 -14-51.1608 152.537  12
  -1   5  14 3.47643 89.1182  14
  -1  -5  14 154.543 145.219   1
   1   5 -14 14.5805 129.224  27
  -1   5  14 50.6514 137.772   5
  -1   5  14-76.1018 138.803  18
   1   5 -14 75.1771 151.388  15
   1   5 -14 40.7318 127.100  17
   1  -5 -14 41.8905 120.271  24
  -1   5  13 1565.62 237.532  14
  -1   5  13 1886.23 307.406   5
  -1  -5  13 2426.46 358.144  21
   1  -5 -13 1728.85 307.497  12
  -1  -5  13 1676.65 300.610  14
   1  -5 -13 1434.66 248.755   8
  -1  -5  13 1773.17 277.373   3
  -1   5  13 1863.31 298.566  18
   1   5 -13 1426.18 280.335  15
   1  -5 -13 1443.80 288.602   4
  -1  -5  13 1646.23 287.843  16
   1   5 -13 1829.44 300.328  27
   1  -5 -13 1655.68 281.719  24
  -1   5  13 1550.97 274.110   6
   1  -5 -13 1773.69 287.798  17
   1   5 -13 1857.99 285.698  17
   1   5 -13 1154.61 263.506   2
  -1   5  13 1496.85 228.218  19
  -1  -5  13 1681.67 320.137   1
  -1   5  12 20683.8 965.530   6
  -1  -5  12 19959.7 944.267  14
  -1   5  12 20501.4 952.163   5
   1  -5 -12 19699.6 976.319  12
   1  -5 -12 20649.2 798.413  20
  -1   5  12 19599.7 945.560  18
  -1  -5  12 20606.3 962.458  16
  -1   5  12 19289.5 820.761  19
  -1  -5  12 19613.6 996.789   1
   1  -5 -12 18819.1 882.949  17
   1  -5 -12 18426.9 880.863  24
  -1  -5  12 19371.3 978.831  21
   1   5 -12 19638.5 969.373  15
   1  -5 -12 18076.2 948.156   4
   1   5 -12 19961.1 889.536  17
   1   5 -12 19349.7 937.823  27
   1  -5 -12 18953.9 889.379   8
  -1  -5  12 20555.2 745.404  22
  -1  -5  12 19031.9 916.623   3
  -1   5  12 20475.1 825.965  14
   1   5 -12 18542.4 970.868   2
   1  -5 -11 19227.7 956.950  12
   1   5 -11 19593.8 960.554  15
  -1  -5  11 21203.5 745.935  22
   1   5 -11 22088.7 976.572  27
   1   5 -11 21180.2 735.082   4
   1  -5 -11 20311.8 901.468  24
  -1  -5  11 20279.9 984.284   1
  -1   5  11 20663.6 958.524  18
  -1   5  11 20454.5 937.791   5
   1   5 -11 22112.0 888.283  17
  -1  -5  11 21164.3 951.591   3
   1  -5 -11 20412.5 877.444  17
  -1  -5  11 21029.2 932.400  14
   1  -5 -11 20582.2 967.467   4
   1  -5 -11 18603.8 864.862   8
  -1  -5  11 20390.1 942.012  16
  -1  -5  11 19556.5 961.704  21
  -1   5  11 20996.2 803.917  14
   1  -5 -11 22808.7 797.172  20
  -1   5  11 22801.4 783.203  29
  -1   5  11 21696.7 859.797  19
  -1   5  11 20020.2 939.565   6
   1   5 -11 21504.8 1006.33   2
  -1  -5  10 35921.8 1015.77  22
  -1  -5  10 34282.2 1250.43  16
   1   5 -10 33773.4 1269.75  15
  -1  -5  10 34419.8 1197.01  14
   1   5 -10 35391.3 1130.83  17
   1   5 -10 34707.1 1264.28  27
  -1   5  10 37630.5 1073.37  29
  -1   5  10 34064.0 1124.87  19
  -1   5  10 34234.5 1038.87  14
  -1  -5  10 33216.4 1269.95  21
   1   5 -10 36842.2 973.558   4
   1  -5 -10 34064.3 1275.19  12
   1  -5 -10 37356.4 1036.31  20
   1  -5 -10 35819.6 1151.38  17
  -1  -5  10 34251.2 1243.74   3
  -1   5  10 34251.5 1248.98   6
  -1   5  10 35729.7 1247.74   5
   1   5 -10 36672.3 935.242  11
   1  -5 -10 32206.8 1155.96   8
   1  -5 -10 33803.3 1242.15   4
  -1   5  10 35398.0 1280.27  18
   1  -5 -10 33825.1 1182.45  24
   1   5 -10 33802.6 1267.70   2
  -1   5   9 48545.0 1386.35  19
   1  -5  -9 45027.9 1507.10  12
   1  -5  -9 48005.3 1341.45  17
  -1   5   9 47033.2 1237.18  14
   1   5  -9 49236.0 1336.91  17
  -1   5   9 50929.7 1329.45  29
  -1  -5   9 48017.9 1414.84  14
   1   5  -9 46356.0 1511.16  15
   1  -5  -9 47758.9 1434.96  24
   1   5  -9 49192.4 1259.31  18
  -1  -5   9 50003.2 1533.84   3
  -1   5   9 45816.6 1459.46   5
   1   5  -9 49161.4 1295.13  25
  -1   5   9 47987.5 1506.60   6
  -1  -5   9 46513.3 1521.89  21
  -1  -5   9 49990.8 1253.00  22
   1   5  -9 51542.8 1152.05   9
  -1   5   9 47308.1 1521.37  18
   1   5  -9 49902.1 1187.37  11
   1   5  -9 47910.4 1506.00   2
   1  -5  -9 46377.6 1413.60   8
  -1  -5   9 48938.2 1511.83  16
   1  -5  -9 50406.1 1225.87  20
   1   5  -9 48973.9 1519.63  27
   1   5  -9 51538.1 1160.86   4
   1  -5  -9 48092.9 1471.35   4
  -1  -5   8 13458.8 711.392   3
   1  -5  -8 14298.9 595.368  17
   1  -5  -8 13407.9 663.408   4
  -1   5   8 14418.8 712.381   5
  -1  -5   8 14511.5 729.559  16
  -1   5   8 13956.7 736.511  18
   1  -5  -8 13360.9 654.709   8
  -1  -5   8 14113.9 640.721  14
  -1   5   8 14325.9 722.350   6
  -1   5   8 13111.1 631.112  19
  -1   5   8 14360.5 615.178  29
   1  -5  -8 13746.3 731.677  12
   1  -5  -8 14886.1 539.617   3
   1   5  -8 14506.6 716.321   2
   1   5  -8 13360.5 568.551  25
   1   5  -8 14056.2 461.143   4
   1   5  -8 13470.2 573.827  17
  -1  -5   8 14624.6 760.101  21
   1   5  -8 15111.3 748.294  27
   1   5  -8 14918.4 533.791   9
  -1  -5   8 14746.7 568.021  22
   1  -5  -8 13043.3 653.807  24
   1   5  -8 14084.4 583.380  18
   1  -5  -8 14282.6 518.270  20
   1   5  -8 14324.0 540.288  11
   1   5  -8 13714.3 725.137  15
  -1   5   8 14522.0 539.057  14
   1   5  -7 514.566 156.560  27
  -1   5   7 714.914 181.865   5
  -1   5   7 912.558 160.702  19
  -1   5   7 621.209 165.597   6
   1  -5  -7 636.235 172.223  12
   1   5  -7 725.874 157.610   2
   1   5  -7 522.343 153.564  15
   1   5  -7 957.732 143.003  25
   1   5  -7 825.821 142.289  18
  -1  -5   7 737.906 126.793  22
   1   5  -7 583.458 104.451  17
   1  -5  -7 613.552 147.963   8
   1  -5  -7 722.999 123.006  17
   1   5  -7 728.708 179.861  29
   1  -5  -7 711.348 101.136  20
  -1  -5   7 764.307 174.533  16
  -1  -5   7 1391.79 241.381  21
   1   5  -7 677.010 116.843   9
  -1   5   7 467.506 112.099  29
  -1   5   7 433.280 165.431  18
   1   5  -7 639.483 77.9163   4
   1  -5  -7 621.524 135.230  24
  -1  -5   7 686.378 167.436   3
   1   5  -7 628.899 154.683   6
   1  -5  -7 810.918 157.250   4
  -1  -5   7 413.244 110.988  14
   1  -5  -7 790.565 123.866   3
   1  -5  -6 6503.98 299.147  20
   1  -5  -6 6206.80 320.144  17
   1   5  -6 6193.18 451.594  27
   1  -5  -6 6098.88 385.594   4
   1  -5  -6 6650.77 250.098  10
  -1  -5   6 6213.72 455.412  16
  -1  -5   6 6582.46 475.006  21
   1   5  -6 6265.08 438.251   6
   1  -5  -6 6226.59 470.554  12
  -1   5   6 6420.54 458.061   6
   1   5  -6 6169.15 212.337   4
  -1  -5   6 6407.05 365.858  14
   1  -5  -6 6002.80 420.245  24
   1   5  -6 6524.56 321.365  17
   1   5  -6 7015.39 488.767  15
  -1   5   6 6779.94 416.593  29
   1   5  -6 5926.48 407.410   2
   1  -5  -6 6784.94 374.877   3
  -1   5   6 6274.23 454.335   5
   1   5  -6 6629.14 404.934  18
  -1   5   6 6602.05 426.180  19
  -1  -5   6 6439.26 358.280  22
  -1  -5   6 5479.74 427.988   3
   1  -5  -6 6953.61 426.939   8
   1   5  -6 6325.82 364.415  25
  -1   5   6 6317.05 467.100  18
   1   5  -6 6187.42 471.643  29
   1  -5  -5 53703.7 1440.73   8
   1   5  -5 55237.6 1358.17  25
  -1  -5   5 53376.6 1545.25   3
   1  -5  -5 54007.7 1506.32  28
   1  -5  -5 56560.2 1395.70   3
   1  -5  -5 59246.4 1147.04  10
  -1   5   5 54024.5 1573.22  18
  -1  -5   5 54890.9 1341.07  22
   1  -5  -5 57293.6 1201.64  17
  -1   5   5 56552.7 1461.68  29
  -1   5   5 53977.8 1478.25  19
   1   5  -5 55036.1 1421.52   2
   1  -5  -5 54243.9 1323.89  21
   1   5  -5 53609.9 1449.65  18
   1  -5  -5 55082.5 1584.50  12
  -1  -5   5 55041.8 1294.47  14
  -1  -5   5 53125.3 1562.45  21
   1  -5  -5 57591.9 1193.23  20
   1   5  -5 55631.3 1190.76  17
  -1  -5   5 54284.4 1568.90  16
   1   5  -5 57434.2 1630.40  29
  -1   5   5 55145.3 1556.61   6
   1   5  -5 56870.2 1538.55   6
   1  -5  -5 52719.6 1352.34   4
   1  -5  -5 53929.1 1483.17  24
  -1  -5   4 145989. 3109.98   3
   1   5  -4 145702. 3088.18   6
  -1   5   4 145865. 3012.49  29
  -1  -5   4 143856. 3136.79  16
   1   5  -4 146202. 3040.23  18
   1   5  -4 147671. 2591.25  17
   1  -5  -4 152032. 2602.63  17
   1   5  -4 144091. 3165.95  29
   1  -5  -4 146360. 2821.73   4
   1   5  -4 140290. 2876.61  25
  -1  -5   4 143591. 2888.68   1
   1  -5  -4 146516. 2659.81  20
   1  -5  -4 139144. 3010.34  24
   1  -5  -4 144207. 2946.38   3
   1  -5  -4 151902. 3008.60   8
  -1  -5   4 150351. 2726.39  14
   1  -5  -4 152595. 2672.10  10
   1  -5  -4 149186. 2894.68  21
  -1  -5   4 142964. 3120.64  21
  -1   5   4 142899. 3110.10   6
  -1   5   4 141469. 3034.81  19
   1   5  -4 139512. 2870.15   2
  -1   5   4 141395. 3124.68  18
   1  -5  -4 140899. 3055.57  28
   1  -5  -4 143373. 3140.74  12
   1  -5  -3 87205.3 2057.97  28
  -1   5   3 85826.3 2090.39  18
   1   5  -3 88099.6 1910.37  25
  -1  -5   3 84133.6 2053.99  21
  -1  -5   3 85715.8 2052.37   3
   1   5  -3 86357.9 2026.76  18
   1  -5  -3 85916.0 1681.42  20
  -1   5   3 87389.2 2088.27   6
  -1  -5   3 86359.8 1819.69   1
  -1  -5   3 85883.9 2104.43  16
   1   5  -3 84733.9 2095.40  29
  -1   5   3 84785.9 1988.56  25
   1   5  -3 85283.8 1808.48   2
  -1   5   3 78981.8 1461.21   2
  -1   5   3 85105.4 2027.56  19
   1  -5  -3 84833.5 2085.01  12
   1  -5  -3 86587.4 1962.84   8
   1  -5  -3 84761.4 1903.64  21
   1  -5  -3 88257.1 1506.04  17
   1  -5  -3 81169.8 1974.81  24
   1   5  -3 86489.2 2061.82   6
   1  -5  -3 88273.7 1748.24   4
   1  -5  -3 87252.5 1955.60   3
  -1   5   3 85847.3 2008.01  29
   1   5  -3 85675.8 1500.30  17
   1  -5  -3 84582.4 1719.97  10
  -1  -5   3 88807.7 1644.13  14
  -1  -5   2 32411.8 835.353   1
  -1  -5   2 31514.8 1046.20  21
   1  -5  -2 31128.5 1071.23  12
   1   5  -2 30162.8 1042.47   6
  -1   5   2 32155.4 672.874   2
  -1  -5   2 29641.8 1066.02  16
  -1   5   2 30732.2 979.136  25
  -1   5   2 30649.0 1058.47   6
  -1   5   2 30683.9 1033.45  19
   1  -5  -2 29146.2 966.731   8
  -1  -5   2 30869.2 1026.28   3
  -1   5   2 32489.7 1044.20  29
   1  -5  -2 32366.2 762.433   4
   1   5  -2 30220.5 808.544   2
   1   5  -2 29803.4 1016.84  18
  -1   5   2 29342.9 1049.68  18
   1  -5  -2 29097.7 945.704  21
   1   5  -2 30209.7 944.851  25
   1  -5  -2 30120.6 1043.91  28
   1  -5  -2 31246.1 849.479  10
   1   5  -2 29517.8 1043.94  29
   1  -5  -2 30443.4 982.664   3
  -1   5   1 12803.1 405.643   2
   1  -5  -1 12862.8 669.200  16
  -1   5   1 12688.8 629.685  19
   1  -5  -1 13093.9 595.471  21
   1   5  -1 12532.3 631.340   6
  -1  -5   1 13580.8 627.596  21
  -1   5   1 12734.4 623.754  29
  -1  -5   1 13522.6 441.714   1
   1   5  -1 13435.7 432.960   2
   1   5  -1 12258.1 612.749  18
   1  -5  -1 14285.3 541.549  10
   1   5  -1 12900.8 638.071  29
  -1   5   1 14922.1 605.106  25
  -1   5   1 13549.8 662.626  18
  -1  -5   1 16311.6 732.920  16
   1  -5  -1 13811.1 626.412   3
   1   5  -1 13326.3 589.846  25
  -1  -5   1 12874.7 609.807   3
  -1   5   1 13525.4 656.551   6
  -1   5   0 309.455 137.324  19
  -1   5   0 198.205 60.3784   2
   1   5   0 72.9745 70.4857  19
  -1  -5   0 248.573 104.456  21
  -1  -5   0 361.708 57.9389   1
  -1  -5   0 204.063 92.1432   3
   1   5   0 62.7622 64.2388  13
  -1  -5   0 97.5664 98.7285  12
  -1   5   0 113.871 96.6019  18
   1  -5   0 193.370 104.121   3
   1   5   0 158.668 81.4272  25
   1  -5   0 392.198 124.665  21
  -1   5   0 198.515 109.772   6
   1   5   0 109.503 96.1582  18
   1  -5   0 253.426 31.9272  14
   1   5   0 175.797 100.032  29
  -1   5   0 129.665 81.9263  25
   1   5   0 82.8769 90.3342   6
   1  -5   0 129.833 97.5325  16
  -1   5   0 506.652 128.306  29
  -1  -5   0 240.540 110.206  16
  -1   5  -1 41866.4 1268.21  29
  -1   5  -1 39901.6 1230.16   6
   1  -5   1 41549.4 1243.52   3
  -1   5  -1 41194.1 1011.71   2
   1   5   1 41159.6 1208.64  25
  -1  -5  -1 40675.8 1292.51  16
  -1  -5  -1 38622.2 1187.88   8
  -1   5  -1 41525.0 1252.67  18
  -1  -5  -1 41430.3 1210.26  28
   1   5   1 40370.0 1232.91  18
   1  -5   1 39731.9 1199.48  21
   1   5   1 39468.2 1254.55   6
  -1  -5  -1 39005.7 753.671   1
  -1  -5  -1 40565.0 1168.80  21
   1   5   1 39922.4 1209.37  29
  -1  -5  -1 40278.6 1043.94  20
   1  -5   1 40908.3 1284.35  16
  -1  -5  -1 41484.1 973.685  10
  -1   5  -1 40524.9 1251.77  19
   1   5   1 39925.6 1109.04  13
   1   5   1 41467.9 1218.38  19
  -1  -5  -1 42024.2 1172.90   3
  -1  -5  -1 41081.4 1212.70  12
  -1   5  -1 39920.7 1077.94  25
  -1  -5  -2 43452.3 1257.49  28
  -1  -5  -2 46139.0 1299.66   8
  -1  -5  -2 45763.0 1233.56  21
   1   5   2 44899.3 1311.79  25
  -1   5  -2 44318.2 1313.13   6
  -1   5  -2 45280.3 1362.50  29
  -1  -5  -2 45014.9 1100.06  20
   1   5   2 43732.3 1278.92  29
  -1   5  -2 45219.3 1141.79   2
  -1  -5  -2 45262.3 1222.97   3
   1   5   2 43153.0 1269.27  19
   1  -5   2 44736.0 1307.93  21
   1   5   2 43426.6 1341.72   6
  -1  -5  -2 41963.0 1203.53  24
  -1   5  -2 44790.3 1310.69  18
   1   5   2 45011.4 1174.99  13
   1   5   2 43252.8 1320.79  18
   1  -5   2 44267.0 1332.90   3
  -1  -5  -2 45655.9 1313.35  12
  -1  -5  -2 46260.1 975.631  10
   1  -5   2 44599.0 1358.19  16
  -1   5  -2 45010.2 1137.59  25
  -1   5  -3 41008.8 1264.87  15
   1   5   3 45031.2 1333.85  18
  -1   5  -3 42401.2 1263.04  18
  -1   5  -3 42737.4 915.431  17
   1  -5   3 43141.4 1324.64  16
   1   5   3 43199.8 1118.16  13
  -1   5  -3 42030.4 1272.18   6
  -1   5  -3 43215.1 1345.12  29
   1   5   3 42037.3 1289.50  25
   1   5   3 43939.6 1247.41  19
  -1  -5  -3 44440.9 1180.84   3
   1  -5   3 43261.8 1324.74   3
  -1   5  -3 42346.7 1157.63   2
  -1  -5  -3 42056.8 1054.84  20
  -1  -5  -3 43040.7 869.595  10
  -1  -5  -3 43947.3 1298.24  12
  -1   5  -3 42149.0 1079.02  25
   1   5   3 42315.1 1239.59  29
  -1  -5  -3 41130.7 1186.27  24
  -1  -5  -3 42619.9 1166.72  21
   1  -5   3 45753.2 1318.47  21
  -1  -5  -3 43450.5 1236.02  28
   1   5   3 43248.4 1324.77   6
  -1  -5  -3 39585.6 1222.39   8
  -1  -5  -3 45892.4 941.472  17
   1   5   4 55896.8 1570.44  25
   1  -5   4 56411.7 1593.65   3
  -1  -5  -4 54791.7 1443.85  24
   1   5   4 56486.0 1482.89  29
  -1   5  -4 55742.5 1545.93  15
   1   5   4 53758.3 1454.82  19
  -1   5  -4 55975.8 1523.45   6
   1  -5   4 56312.6 1582.10  16
  -1  -5  -4 55766.4 1399.76   4
  -1   5  -4 55925.2 1493.45  18
   1   5   4 56176.2 1085.79  14
   1   5   4 58020.9 1327.59  13
  -1   5  -4 55823.7 1293.83  25
  -1  -5  -4 55341.8 1367.75   3
  -1  -5  -4 55782.4 1385.33  21
  -1  -5  -4 56126.6 1554.10  12
   1   5   4 54644.5 1564.67  18
   1   5   4 54204.8 1564.98   6
  -1  -5  -4 55366.6 1497.60   8
  -1  -5  -4 53579.5 1278.96  20
  -1  -5  -4 59305.3 1233.66  17
  -1  -5  -4 56687.7 1477.64  28
  -1   5  -4 55711.5 1204.02  17
  -1   5  -4 56566.9 1617.05  29
   1  -5   4 56130.0 1561.53  21
  -1   5  -4 55054.8 1446.35   2
   1   5   5 21794.1 800.190  29
  -1   5  -5 19802.2 793.838   2
  -1  -5  -5 20952.1 787.111  24
   1   5   5 20373.0 782.034  19
   1   5   5 21841.1 568.979  14
  -1  -5  -5 20650.4 860.759  12
  -1   5  -5 20918.0 646.904  17
   1  -5   5 20761.3 633.592  22
  -1  -5  -5 21125.5 698.678   3
  -1   5  -5 21547.0 665.909  25
  -1  -5  -5 21594.6 666.662  17
   1  -5   5 21345.0 897.438   3
   1  -5   5 21039.1 874.873  16
   1  -5   5 21230.9 869.852  21
  -1  -5  -5 21119.3 677.065  20
   1   5   5 21027.6 661.074  13
   1   5   5 19887.4 856.178   6
  -1  -5  -5 22325.3 840.895   8
   1   5   5 19312.1 825.455   5
  -1   5  -5 20483.5 784.490  18
   1   5   5 20469.9 863.783  18
  -1  -5  -5 21049.8 776.535   4
  -1   5  -5 19788.1 836.103  15
  -1   5  -5 19561.7 802.838   6
  -1  -5  -6 1246.07 152.677  20
   1   5   6 1190.83 182.195  29
  -1  -5  -6 1123.33 151.340  17
  -1   5  -6 1076.26 171.806  18
   1  -5   6 1072.35 203.685   3
   1  -5   6 1151.63 227.202  21
  -1   5  -6 985.311 187.420   6
   1   5   6 968.704 175.795  19
   1   5   6 1329.36 134.732  14
   1   5   6 1282.12 218.581   5
  -1  -5  -6 830.499 161.169  24
  -1  -5  -6 1061.01 178.184   4
   1  -5   6 897.514 181.657  16
  -1  -5  -6 1113.71 191.965   8
   1   5   6 1270.11 214.577   6
   1  -5   6 1259.58 139.004  22
  -1  -5  -6 794.185 118.731   3
   1   5   6 1052.56 132.598  13
  -1   5  -6 874.498 126.286  25
   1   5   6 1122.23 203.231  18
  -1   5  -6 1010.32 142.477  17
  -1   5  -6 1200.75 220.544  15
  -1  -5  -6 1292.50 223.064  12
  -1   5  -6 983.895 189.808   2
   1   5   7 2179.76 283.937   6
   1  -5   7 1904.07 172.765  22
   1   5   7 1895.67 265.495   5
  -1  -5  -7 1729.61 193.090  20
   1   5   7 1517.73 202.857  19
  -1   5  -7 1793.15 261.952  27
  -1  -5  -7 1952.14 252.656   4
  -1   5  -7 2000.05 211.449  17
   1  -5   7 1550.83 251.342  21
   1   5   7 1757.50 215.218  29
   1   5   7 1878.98 167.093  13
   1   5   7 1516.54 255.171  18
  -1   5  -7 1961.38 265.333  15
   1  -5   7 1781.15 261.183   3
   1   5   7 2263.52 193.008  14
  -1  -5  -7 1608.67 257.779  12
  -1   5  -7 1710.79 209.887  18
  -1  -5  -7 1707.41 201.532  17
  -1  -5  -7 1755.75 160.324   3
  -1  -5  -7 1600.54 232.533   8
  -1  -5  -7 2011.04 244.765  24
  -1   5  -7 1557.61 243.312   2
   1  -5   7 1957.27 264.444  16
  -1   5  -7 1811.83 233.914   6
  -1   5  -7 2092.22 207.800  11
  -1   5  -7 1623.64 171.481  25
   1  -5   8 19932.0 906.411  21
  -1   5  -8 18951.1 747.118  17
   1   5   8 18866.2 755.630  19
   1   5   8 19477.2 881.000   6
   1  -5   8 19752.8 903.773   3
   1   5   8 18684.0 869.125  18
  -1  -5  -8 20009.6 728.031  20
  -1   5  -8 18976.1 878.116  15
   1  -5   8 20863.5 642.478  22
  -1  -5  -8 19517.5 894.301  12
  -1   5  -8 19770.5 892.832  27
   1  -5   8 19698.0 878.884  16
  -1  -5  -8 18675.7 753.514  17
  -1  -5  -8 18773.7 832.375   8
   1   5   8 20419.4 692.578  14
  -1  -5  -8 19516.5 811.690  24
   1   5   8 20886.0 597.004  13
  -1   5  -8 19401.8 736.277  18
   1   5   8 20333.9 769.352  29
   1   5   8 20908.2 884.361   5
  -1   5  -8 19430.2 895.322   2
  -1  -5  -8 19742.4 869.804   4
  -1   5  -8 21082.5 709.115  11
   1   5   9 41532.9 1384.64  18
  -1  -5  -9 41749.3 1188.00  20
  -1   5  -9 41161.4 1383.09  27
  -1  -5  -9 39788.8 1388.35  12
   1   5   9 42612.4 1200.40  29
   1   5   9 39505.6 1338.68   5
   1  -5   9 40674.2 1367.02  16
  -1  -5  -9 36977.7 1246.78  24
   1  -5   9 40100.2 1380.31   3
  -1  -5  -9 36512.8 1278.75   8
  -1  -5  -9 41481.5 1263.04  17
  -1   5  -9 40532.0 1418.45   2
  -1   5  -9 39058.9 1373.70  15
   1  -5   9 42347.9 1040.99  22
   1   5   9 37467.7 1332.51   6
  -1  -5  -9 38426.8 1358.18   4
  -1   5  -9 41494.5 1096.66  11
   1  -5   9 37993.7 1377.72  21
  -1   5  -9 40713.9 1238.77  17
   1   5   9 40005.5 1138.23  14
   1   5   9 41472.8 1215.37  19
  -1   5  -9 41760.6 1037.31   4
  -1  -5 -10 56645.2 1771.45  12
  -1   5 -10 56825.8 1759.97  15
  -1   5 -10 58576.1 1636.20  17
  -1  -5 -10 58608.3 1710.22   8
   1   5  10 56682.1 1732.67  18
  -1   5 -10 57359.7 1822.37   2
   1   5  10 56758.6 1507.93  14
  -1   5 -10 61997.4 1427.25  11
   1   5  10 59927.0 1520.92  29
   1   5  10 54572.0 1709.68   6
  -1  -5 -10 59602.4 1559.41  20
  -1  -5 -10 58808.4 1656.88  17
   1   5  10 57751.8 1542.30  19
   1  -5  10 57055.4 1745.06   3
   1   5  10 56025.4 1697.70   5
   1  -5  10 56514.2 1722.67  16
   1  -5  10 54061.1 1744.38  21
  -1   5 -10 57649.3 1733.88  27
  -1  -5 -10 58398.5 1796.58   4
  -1  -5 -10 56771.4 1650.76  24
   1   5  11 50339.8 1639.08   6
   1   5  11 55893.0 1431.64  29
  -1  -5 -11 50381.7 1569.91  24
  -1   5 -11 51958.9 1762.80   2
  -1  -5 -11 50046.2 1606.13   8
   1   5  11 50671.8 1645.26  18
  -1  -5 -11 51172.6 1722.91   4
  -1   5 -11 51104.8 1636.74  27
   1  -5  11 51770.1 1656.55   3
   1   5  11 52062.3 1464.47  14
  -1   5 -11 51099.9 1684.74  15
  -1   5 -11 52480.0 1581.34  17
  -1  -5 -11 49206.8 1673.35  12
   1  -5  11 50178.5 1691.98  21
  -1  -5 -11 53858.5 1501.35  20
   1  -5  11 52544.5 1654.57  16
  -1  -5 -11 50308.8 1580.35  17
   1   5  11 51770.2 1644.00   5
   1   5  11 52415.6 1452.84  19
   1   5  12 12534.4 758.824   6
  -1   5 -12 12773.6 785.007  15
   1   5  12 12610.2 665.735  14
  -1   5 -12 12733.6 751.094  27
  -1  -5 -12 12640.8 747.580   8
   1   5  12 11868.8 735.426   5
   1  -5  12 12967.1 754.799   3
   1  -5  12 12811.8 793.469  21
  -1  -5 -12 13195.5 758.706  17
  -1   5 -12 11684.3 802.863   2
  -1  -5 -12 12389.8 719.344  24
  -1  -5 -12 13137.3 683.124  20
  -1   5 -12 12480.4 724.553  17
   1   5  12 13313.1 781.327  18
  -1  -5 -12 12851.2 823.643   4
  -1  -5 -12 13248.2 813.120  12
   1  -5  12 12397.6 748.500  16
  -1  -5 -13 3084.06 418.302   4
   1   5  13 2757.62 366.850   5
  -1   5 -13 2816.52 363.026  17
   1  -5  13 2715.49 349.023   3
   1   5  13 3729.53 422.757   6
  -1   5 -13 3166.22 385.562  27
   1  -5  13 3383.14 398.610  16
  -1  -5 -13 2786.56 369.051   8
   1   5  13 2955.23 377.913  18
   1  -5  13 2871.34 385.934  21
  -1  -5 -13 2957.17 391.722  12
  -1   5 -13 2810.61 412.403   2
  -1  -5 -13 2814.67 372.503  17
  -1   5 -13 2432.58 358.564  15
  -1  -5 -13 2890.85 359.503  24
   1   5  13 3384.47 353.373  14
  -1  -5 -13 3451.25 363.180  20
   1   5  14 1344.26 272.942   6
  -1  -5 -14 1060.89 240.371  24
   1   5  14 1363.67 280.509   5
   1   5  14 1381.91 253.304  14
   1  -5  14 1085.87 272.248  14
   1  -5  14 1095.41 243.805   3
  -1   5 -14 1101.60 273.104  15
  -1  -5 -14 1114.17 266.201  17
   1   5  14 704.697 204.867  18
  -1   5 -14 1027.43 303.041   2
   1  -5  14 1162.41 274.441  21
  -1  -5 -14 867.955 253.279   4
  -1   5 -14 1323.87 269.925  17
   1  -5  14 1279.20 253.202  16
  -1  -5 -14 770.633 199.665   8
  -1  -5 -14 1408.30 274.710  12
  -1  -5 -14 1154.17 230.161  20
  -1   5 -14 1043.53 241.572  27
   1  -5  15 14787.6 885.337  16
  -1   5 -15 13485.1 864.612  17
   1  -5  15 13856.5 910.705  21
  -1   5 -15 14592.0 851.846  27
  -1   5 -15 12436.2 861.121  15
  -1  -5 -15 14693.5 912.519  17
  -1  -5 -15 14478.9 928.245  12
   1  -5  15 13903.6 964.748   1
   1   5  15 13591.8 853.354   5
   1  -5  15 14382.6 829.907   3
   1   5  15 12787.2 828.991  18
   1   5  15 13225.7 783.396  14
  -1  -5 -15 14112.6 843.400  24
   1  -5  15 13742.2 913.367  14
   1   5  15 14897.8 895.837   6
  -1  -5 -15 11810.9 799.536   8
  -1   5 -15 13865.1 960.592   2
  -1  -5 -15 12289.0 906.023   4
  -1  -5 -16 19362.9 1183.46   4
  -1   5 -16 19164.7 1178.99   2
   1   5  16 19729.1 1071.54   6
   1  -5  16 16404.5 1095.51   1
   1  -5  16 19068.0 1093.64  21
  -1  -5 -16 18281.4 1083.46  12
  -1  -5 -16 17653.0 991.781  24
   1   5  16 18940.8 1055.87   5
   1   5  16 19454.8 999.486  14
  -1  -5 -16 17058.3 1002.43   8
  -1   5 -16 16392.0 1023.70  15
   1   5  16 20381.1 1078.33  18
  -1   5 -16 19223.0 1080.11  17
  -1  -5 -16 20717.0 1142.00  17
  -1   5 -16 21662.3 1068.22  27
   1  -5  16 17248.8 1083.38  14
   1  -5  16 19279.9 1048.45  16
   1   5  17 7969.43 683.727  18
   1   5  17 8109.95 694.331   6
  -1   5 -17 8027.57 655.588  27
  -1   5 -17 7359.40 747.037   2
   1   5  17 7535.34 633.624  14
  -1   5 -17 6980.46 672.428  17
   1   5  17 8145.92 700.018   5
   1  -5  17 7387.98 690.221  21
   1  -5  17 8683.90 707.123  16
   1  -5  17 6614.01 705.809   1
  -1  -5 -17 8105.04 779.913   4
  -1  -5 -17 7027.73 646.143   8
  -1   5 -17 7537.40 705.073  15
   1  -5  17 6849.65 696.553  14
  -1  -5 -17 7146.11 690.796  12
  -1  -5 -17 6422.29 658.838  17
  -1  -5 -17 7795.83 662.726  24
   1   5  18 3566.65 459.753  14
   1  -5  18 2576.71 430.048  21
   1   5  18 3105.54 461.434  23
  -1  -5 -18 3308.99 530.918   4
   1  -5  18 2710.42 467.469   1
  -1  -5 -18 3384.07 500.016  17
  -1  -5 -18 3027.05 467.389  12
  -1  -5 -18 2660.03 409.904  24
   1  -5  18 3964.17 495.930  16
   1   5  18 3683.57 486.955  18
  -1   5 -18 2906.42 449.183  15
  -1   5 -18 3613.21 498.730  17
   1   5  18 3720.56 493.227   5
   1   5  18 2880.92 425.664   6
   1  -5  18 2999.81 497.963  14
  -1  -5 -19 3554.19 534.776  17
  -1  -5 -19 2517.14 416.871  24
   1  -5  19 2546.18 450.509  21
   1   5  19 2447.72 410.513  23
   1   5  19 2532.71 441.225   5
  -1  -5 -19 1460.77 351.668  12
  -1   5 -19 2046.66 398.616  15
   1   5  19 2627.50 424.257   6
   1  -5  19 1994.85 444.890   1
   1  -5  19 2337.77 448.482  14
  -1  -5 -19 2808.31 517.379   4
  -1   5 -19 2057.20 418.688  17
   1   5  20 159.884 164.116   5
  -1   5 -20 80.7295 186.360  17
  -1   5 -20 121.114 173.789  15
   1   5  20 5.67988 179.337  22
  -1  -5 -20 270.274 198.926   4
  -1  -5 -20 506.356 245.831  24
  -1  -5 -20 189.627 185.455  12
   1  -5  20 248.474 232.632   1
   1  -5  20 35.9571 167.817  21
  -1  -5 -20 125.337 189.177  17
   1  -5  20 101.178 218.237  14
  -1   5 -21 1871.55 412.527  17
  -1  -5 -21 1725.01 399.381  12
   1  -5  21 2375.67 501.166   1
  -1  -5 -21 1897.34 414.303  17
   1  -5  21 1664.63 386.521  21
  -1  -5 -21 1996.06 388.186  24
   1   5  21 1998.83 405.873   5
   1   5  21 1931.07 420.193  22
   1  -5  21 1502.62 435.625  14
  -1   5 -21 1976.53 394.065  15
   1   5  22 383.898 230.464   5
   1  -5  22 1147.97 380.899  14
  -1   5 -22 686.610 286.710  17
   1   5  22 1445.77 395.048  22
   1  -5  22 747.966 289.301  21
  -1  -5 -22 699.635 324.337  17
  -1  -5 -22 891.514 321.076  12
  -1  -7  22 3545.43 555.230  21
  -1  -7  21-489.765 266.987   1
  -1  -7  21-167.052 209.894  21
  -1   7  21-624.233 273.204  23
   1  -7 -21 5.82519 187.857  12
   1   7 -21 200.652 240.831  15
  -1   7  21-49.6122 154.247  22
   1  -7 -21-24.2948 174.185  24
  -1   7  21-436.360 262.665   5
  -1  -7  21 253.498 236.541  14
  -1   7  21 18.8742 206.386   6
  -1   7  20-205.762 195.694  23
   1  -7 -20 150.163 203.859   4
  -1  -7  20-111.727 206.358  21
  -1   7  20-11.3698 155.623   6
  -1  -7  20-219.914 207.540   1
  -1   7  20 4.19118 192.020   5
  -1  -7  20 66.2180 180.273  16
   1  -7 -20 126.683 177.393  12
  -1  -7  20 17.6750 159.096  14
   1   7 -20 167.712 213.248  27
   1   7 -20 76.9690 159.515  15
   1  -7 -20-114.331 159.751  24
   1  -7 -19 554.134 247.500   8
  -1  -7  19 240.177 204.740  16
  -1  -7  19 469.027 206.208  21
   1  -7 -19 270.459 207.806   4
   1   7 -19 120.215 182.937  15
  -1   7  19 729.709 287.508  18
   1   7 -19 520.103 254.101  27
  -1  -7  19 415.414 235.440  14
  -1   7  19 474.401 209.431   6
   1  -7 -19 677.062 301.667  12
  -1   7  19 456.836 263.933  23
  -1  -7  19 377.329 235.794   1
  -1   7  19 652.329 275.483   5
   1  -7 -19 449.399 223.422  24
  -1   7  18 12111.8 931.912  18
   1   7 -18 12185.1 977.713  15
  -1   7  18 13018.6 968.025   6
  -1   7  18 12211.3 954.698   5
   1   7 -18 14259.0 999.039  27
   1  -7 -18 11333.5 874.699   8
  -1  -7  18 11989.9 975.379   1
  -1  -7  18 12772.0 987.794  21
  -1  -7  18 14531.2 968.612   3
   1  -7 -18 13164.4 1029.06  12
   1  -7 -18 12470.5 925.031  24
   1  -7 -18 12231.8 966.810   4
  -1  -7  18 13970.6 1016.45  16
  -1  -7  18 12731.7 939.970  14
   1  -7 -17-60.3107 217.731   4
  -1  -7  17 289.553 214.130  16
   1  -7 -17 37.3366 176.329  12
   1   7 -17 118.606 173.293  27
  -1   7  17 39.0941 176.661   5
   1  -7 -17-88.1831 166.091  24
  -1   7  17 19.2261 162.576   6
  -1   7  17-70.5811 193.350  18
  -1  -7  17-67.1471 156.222   3
  -1  -7  17 309.306 196.736  21
  -1  -7  17-254.723 246.900   1
  -1  -7  17 34.6361 173.969  14
   1  -7 -17 76.2395 150.688   8
   1   7 -17 166.900 186.381  15
  -1  -7  16 11976.5 901.436  16
  -1  -7  16 9733.49 824.126   1
  -1   7  16 11260.5 860.901   6
   1  -7 -16 11663.8 929.276  12
   1   7 -16 13414.3 932.955  27
   1  -7 -16 9789.33 774.901   8
   1   7 -16 11680.6 917.689  15
  -1  -7  16 11861.7 869.911   3
  -1  -7  16 10704.8 863.057  21
   1  -7 -16 11517.8 873.485   4
  -1  -7  16 10257.2 787.501  14
   1  -7 -16 10096.7 797.467  24
  -1   7  16 11648.9 882.954  18
  -1   7  16 11262.4 875.074   5
  -1   7  15 889.760 285.502   5
  -1  -7  15 1083.36 269.099  14
  -1  -7  15 261.142 180.784   1
   1  -7 -15 708.329 226.483   8
  -1  -7  15 1078.63 293.990  21
  -1  -7  15 654.591 216.975   3
   1   7 -15 552.129 224.767  27
   1  -7 -15 802.356 247.633  24
  -1   7  15 577.702 214.620   6
  -1   7  15 707.769 288.308  18
   1   7 -15 666.898 278.212  15
   1  -7 -15 820.643 260.437  12
  -1  -7  15 472.876 216.187  16
   1  -7 -15 619.123 257.018   4
  -1   7  14 586.210 232.955  18
   1  -7 -14 64.3576 171.802   8
  -1  -7  14 3.12340 153.933   1
   1  -7 -14 177.773 150.242  24
  -1  -7  14 419.142 194.716  16
   1  -7 -14 384.108 169.603   4
  -1   7  14 19.2399 157.879   6
  -1  -7  14 45.3945 174.451  21
   1  -7 -14 269.514 207.145  12
  -1  -7  14 315.362 178.166  14
   1   7 -14 178.663 175.667  15
  -1   7  14 208.540 190.573   5
  -1  -7  14 7.14328 131.842   3
   1   7 -14 118.069 177.278  27
   1   7 -13 14.1405 182.484  15
  -1   7  13 5.85931 171.351  18
  -1   7  13 257.607 208.119   5
   1  -7 -13 323.660 191.387   4
  -1  -7  13 46.7442 115.661  14
   1  -7 -13-138.978 189.529   8
   1  -7 -13 159.590 170.473  24
  -1  -7  13 280.753 189.784   1
  -1   7  13 66.6372 147.286   6
  -1  -7  13 84.9099 134.630   3
  -1  -7  13 126.760 159.492  21
   1   7 -13-131.699 175.334  27
  -1  -7  13-79.1131 159.679  16
   1  -7 -13 122.379 150.743  12
   1  -7 -12 14662.6 847.625   4
   1  -7 -12 11812.4 772.601   8
  -1  -7  12 13178.4 757.399  14
  -1  -7  12 13136.1 874.644  16
  -1  -7  12 11559.1 791.589   1
   1   7 -12 13846.9 862.510   2
  -1   7  12 13497.2 765.668  19
   1  -7 -12 13509.2 921.872  12
   1   7 -12 11537.3 836.447  15
  -1  -7  12 13716.6 880.552   3
  -1   7  12 13773.6 898.104  18
   1  -7 -12 12897.8 819.080  24
  -1  -7  12 13488.6 892.946  21
  -1   7  12 13767.9 881.326   6
  -1   7  12 13917.4 889.556   5
   1   7 -12 13540.9 883.151  27
  -1  -7  11 2181.78 329.803   1
  -1  -7  11 2354.00 393.930  21
   1   7 -11 2291.24 361.286  15
   1   7 -11 2067.88 334.643   2
  -1  -7  11 2584.34 316.540  14
  -1   7  11 2515.74 391.005  18
   1  -7 -11 2530.64 362.439  24
   1  -7 -11 2283.73 391.159  12
   1   7 -11 2513.11 384.381  27
  -1  -7  11 2589.53 387.343  16
   1  -7 -11 2649.90 354.336   4
  -1   7  11 2517.72 395.724   5
  -1  -7  11 2264.48 363.159   3
  -1   7  11 1985.48 294.249  19
   1  -7 -11 2450.07 342.114   8
  -1   7  11 2430.70 380.606   6
   1  -7 -10 44355.1 1585.67  24
   1   7 -10 41353.0 1641.20  15
   1   7 -10 48262.9 1434.35  18
   1  -7 -10 43089.6 1530.59   8
  -1   7  10 48204.5 1702.77   6
  -1  -7  10 45602.1 1677.30   3
   1   7 -10 45648.5 1698.67  27
  -1  -7  10 48208.2 1458.12  14
   1  -7 -10 43604.9 1703.17  12
  -1   7  10 51760.4 1506.38  29
   1   7 -10 45944.1 1587.19   2
  -1   7  10 50036.4 1575.34  19
  -1  -7  10 45424.4 1573.26   1
  -1   7  10 47093.9 1710.37  18
  -1   7  10 46100.6 1670.00   5
  -1  -7  10 48928.5 1737.41  16
  -1  -7  10 44694.2 1672.59  21
   1  -7 -10 48688.5 1550.09   4
   1   7  -9 1418.20 298.706  15
  -1   7   9 1671.55 315.518  18
  -1  -7   9 1548.16 264.280   1
   1  -7  -9 1748.37 290.957  24
  -1  -7   9 1905.51 332.851   3
  -1  -7   9 1426.14 294.337  21
  -1   7   9 1314.42 247.925  19
   1  -7  -9 1534.86 266.036   8
   1   7  -9 1846.90 300.349   6
   1  -7  -9 1396.09 303.761  12
   1  -7  -9 1175.71 223.752   4
   1   7  -9 1616.72 289.861  27
   1   7  -9 1328.47 254.172   2
  -1  -7   9 1469.73 218.906  14
  -1  -7   9 1361.98 292.733  16
   1   7  -9 1793.31 229.936  11
   1   7  -9 1728.28 229.097  25
  -1   7   9 1292.41 233.713  29
  -1   7   9 1535.43 300.293   6
   1   7  -9 1808.84 255.869  18
   1   7  -8 3579.65 426.701  15
   1  -7  -8 4043.86 426.381  24
   1   7  -8 4562.34 459.082   6
   1  -7  -8 4728.26 497.814  12
   1   7  -8 4303.07 388.743  18
   1  -7  -8 4292.60 374.468   4
   1   7  -8 4685.13 369.583  25
  -1  -7   8 4456.11 468.408   3
  -1   7   8 4254.91 412.509  19
  -1   7   8 3759.84 449.174  18
  -1   7   8 4011.88 447.452   6
   1  -7  -8 3938.48 332.896   3
  -1  -7   8 3856.52 450.428  21
  -1  -7   8 4452.22 479.104  16
   1   7  -8 3722.71 441.394  27
  -1   7   8 5204.85 430.058  29
   1   7  -8 4425.89 412.736   2
  -1  -7   8 4202.75 402.337   1
   1   7  -8 4852.20 373.983   9
  -1   7   8 4146.97 446.549  25
   1  -7  -8 3132.93 359.894   8
  -1  -7   8 4606.29 353.932  14
   1  -7  -7 138.831 138.849   8
   1   7  -7 115.872 105.656   2
   1   7  -7 365.785 206.566  15
  -1  -7   7 167.726 136.915   3
   1   7  -7 42.2185 136.652  27
  -1   7   7-161.032 139.524  19
  -1  -7   7 12.3179 155.644  21
  -1  -7   7 153.669 121.866  16
   1   7  -7 161.503 124.993  29
   1  -7  -7-13.2959 155.072  12
  -1   7   7 153.285 117.272  29
   1  -7  -7 88.9310 139.813  24
   1   7  -7 10.0224 77.2322  25
   1  -7  -7 210.435 107.223   3
  -1   7   7 33.5359 131.770  18
   1   7  -7-47.2059 138.127   6
  -1  -7   7 59.5542 99.3052   1
  -1   7   7-98.6768 135.321   6
  -1   7   7 194.509 146.697  25
   1   7  -7 125.195 110.259  18
   1  -7  -7 38.5010 82.8537   4
   1   7  -6 2797.46 371.145  29
  -1   7   6 2252.79 305.263  19
   1   7  -6 2827.09 329.782  18
  -1  -7   6 3001.34 369.645   3
  -1   7   6 3129.69 394.215  18
   1  -7  -6 2433.45 269.169  21
   1   7  -6 2888.72 359.427   6
  -1  -7   6 3005.28 313.380   1
   1  -7  -6 2690.38 345.545  28
   1  -7  -6 2509.87 335.100  24
  -1  -7   6 2384.12 348.811  21
  -1  -7   6 3015.75 392.346  16
   1  -7  -6 2662.99 288.982   3
  -1   7   6 2758.03 345.188  25
   1   7  -6 2222.90 346.111  15
   1   7  -6 2948.63 294.084  25
   1  -7  -6 3101.68 347.404   8
  -1   7   6 2884.01 329.746  29
   1   7  -6 2502.11 283.137   2
   1  -7  -6 2429.12 350.540  12
  -1   7   6 2999.25 383.576   6
   1  -7  -6 2710.01 267.417   4
   1  -7  -5 257.923 146.857  28
   1  -7  -5 257.221 150.818  12
   1  -7  -5 498.923 172.348   8
  -1  -7   5 11.1469 162.712  21
   1  -7  -5 189.887 109.099   3
  -1  -7   5 115.822 86.4105   1
   1  -7  -5 113.775 100.093  21
  -1  -7   5 154.082 166.230   3
   1   7  -5 262.038 163.076   6
  -1   7   5 120.416 130.676  19
   1   7  -5 14.2322 152.067  29
  -1   7   5 262.400 145.950  25
   1  -7  -5 292.835 99.9877   4
   1   7  -5 95.4168 96.1822  25
  -1   7   5-10.8091 154.218  18
  -1  -7   5 295.473 166.989  16
   1   7  -5 211.110 128.326  18
  -1   7   5 254.234 156.830   6
   1  -7  -5 90.9744 129.771  24
   1   7  -5 24.3711 98.6104   2
  -1   7   5 38.3175 107.975  29
  -1  -7   4 132474. 3179.23   3
   1   7  -4 134293. 2914.41  25
  -1   7   4 136750. 3245.10  18
   1  -7  -4 131885. 3022.32   8
  -1   7   4 138473. 3101.15  25
   1  -7  -4 136551. 3167.66  28
   1   7  -4 134153. 2786.88   2
  -1  -7   4 137449. 3280.77  16
  -1   7   4 135078. 3084.73  29
   1  -7  -4 133708. 2938.33  21
   1   7  -4 139781. 3137.25  18
  -1  -7   4 131322. 3141.48  21
  -1   7   4 136856. 3223.51   6
   1   7  -4 133599. 3174.80   6
   1  -7  -4 127645. 3042.31  24
   1  -7  -4 131180. 3195.09  12
   1   7  -4 138412. 3253.00  29
  -1  -7   4 141655. 2825.82   1
  -1   7   4 132870. 3101.03  19
   1  -7  -4 135572. 3015.94   3
  -1  -7   3 3249.60 406.681  16
   1  -7  -3 2955.21 335.928   8
   1   7  -3 3579.24 399.070   6
   1  -7  -3 3599.50 355.530   3
  -1   7   3 3588.60 381.988  29
  -1   7   3 3172.34 392.226  18
   1   7  -3 3820.37 393.327  18
   1  -7  -3 3311.88 375.303  24
   1  -7  -3 3699.62 409.857  12
   1  -7  -3 3641.43 347.251  21
  -1  -7   3 3852.13 415.091  21
   1  -7  -3 3612.33 247.178  20
   1  -7  -3 3562.52 267.615  10
  -1   7   3 3519.35 379.149  19
   1  -7  -3 3559.50 392.585  28
  -1  -7   3 3736.96 399.488   3
   1   7  -3 3365.74 391.495  29
   1   7  -3 3465.99 329.349  25
  -1  -7   3 3929.99 290.556   1
  -1   7   3 4459.62 397.470  25
  -1   7   3 3939.64 417.290   6
   1  -7  -2 35491.1 1302.62  28
   1   7  -2 34881.6 1162.27  25
  -1  -7   2 34709.2 1245.84  21
   1  -7  -2 33934.8 1207.70   3
  -1   7   2 33695.7 1296.09   6
  -1   7   2 35006.7 1265.09  29
  -1   7   2 34423.5 1184.32  25
  -1  -7   2 34937.5 1353.89  16
   1  -7  -2 33417.6 1165.94  21
   1  -7  -2 33655.5 1195.37   8
  -1  -7   2 34867.8 1273.25   3
   1  -7  -2 34554.2 955.211  20
  -1  -7   2 34986.0 948.216   1
   1   7  -2 34092.5 1255.00  18
   1  -7  -2 38031.1 1051.84  10
   1  -7  -2 31822.8 1246.42  12
   1   7  -2 35250.3 1310.57  29
  -1   7   2 34240.5 1270.26  19
   1   7  -2 34616.2 1304.09   6
  -1   7   2 34846.0 1310.29  18
   1   7  -1 1479.31 267.443   6
   1  -7  -1 2093.14 316.337  16
  -1  -7   1 1230.33 243.110  16
  -1   7   1 1345.75 208.598  25
   1  -7  -1 1349.42 242.810   8
  -1   7   1 1173.93 244.996  19
   1  -7  -1 1420.74 267.784  12
  -1   7   1 1640.26 279.646   6
   1  -7  -1 1631.42 286.722  28
   1   7  -1 1317.78 242.492  18
  -1   7   1 1389.39 266.987  18
  -1  -7   1 1553.75 266.996  21
  -1  -7   1 1458.39 239.113   3
   1  -7  -1 1558.16 240.910   3
  -1  -7   1 1690.47 266.353  12
   1  -7  -1 1762.37 257.264  21
   1   7  -1 1337.62 251.759  29
   1  -7  -1 1656.88 207.055  10
   1   7  -1 1747.68 241.932  25
  -1   7   1 1526.70 256.801  29
   1   7   0 13824.5 777.075  18
  -1   7   0 15855.4 537.702   2
  -1   7   0 16891.5 740.512  25
  -1  -7   0 15643.7 797.966   8
  -1  -7   0 15826.9 811.829  28
   1  -7   0 16431.6 888.055  16
   1  -7   0 16141.8 808.752   3
  -1  -7   0 16336.6 891.961  16
   1   7   0 15880.9 828.479  29
  -1   7   0 15456.1 824.212  29
  -1  -7   0 14913.2 764.446  21
   1   7   0 16349.7 858.909   6
  -1   7   0 15259.4 822.632  19
  -1   7   0 14476.2 796.829  18
   1  -7   0 15213.9 763.863  21
  -1  -7   0 16293.7 640.187  10
  -1   7   0 14770.4 821.911   6
   1  -7   0 16264.2 699.962  10
  -1  -7   0 14865.0 774.596  12
  -1  -7   0 14672.1 758.469   3
   1   7   0 16987.6 789.497  25
   1  -7   1 5766.72 417.263  10
  -1  -7  -1 5673.13 370.548  20
  -1  -7  -1 6566.42 358.374  10
  -1  -7  -1 5402.95 442.472   3
   1   7   1 5849.90 508.139  18
  -1  -7  -1 5738.57 476.571  12
   1  -7   1 6026.32 489.143   3
   1  -7   1 5311.45 322.384   1
   1   7   1 5415.68 506.883   6
   1  -7   1 6147.54 479.584  21
   1  -7   1 5189.37 481.238  16
  -1  -7  -1 5237.49 456.596   8
  -1   7  -1 5706.95 484.785  18
  -1  -7  -1 5528.69 448.443  21
  -1  -7  -1 6138.31 487.885  28
  -1  -7  -1 5829.46 446.234  24
  -1   7  -1 6020.30 419.426  25
  -1   7  -1 5415.56 481.863  29
   1   7   1 4881.75 440.927  19
  -1   7  -1 5472.42 324.822   2
  -1   7  -1 6046.97 506.668   6
   1   7   1 5881.54 491.758  29
   1   7   1 5571.23 454.693  25
  -1  -7  -2 37701.1 1248.65   3
   1   7   2 35778.8 1279.67  19
  -1   7  -2 38117.6 1063.07   2
   1   7   2 39208.9 1340.93  29
   1   7   2 38097.4 1389.66   6
   1  -7   2 36502.5 1297.16  21
   1  -7   2 38212.7 1412.38  16
  -1   7  -2 36826.1 1328.65  18
   1   7   2 37253.8 1371.15  18
  -1  -7  -2 34843.9 1296.12  12
  -1   7  -2 36309.8 1335.56   6
   1   7   2 37173.5 1303.91  25
  -1   7  -2 36864.1 1366.87  29
  -1   7  -2 37745.4 1147.92  25
  -1  -7  -2 35028.3 1267.21   8
  -1  -7  -2 35095.4 1213.16  24
  -1  -7  -2 38901.2 1327.01  28
  -1  -7  -2 35076.3 1040.85  20
  -1  -7  -2 36384.6 1234.31  21
   1  -7   2 36645.0 1333.26   3
  -1   7  -3 1807.63 217.157   2
  -1  -7  -3 2139.24 289.194  28
  -1  -7  -3 1821.55 195.833  20
   1   7   3 1245.15 222.254  19
  -1  -7  -3 1650.38 239.296   3
  -1  -7  -3 1846.79 287.424  12
   1   7   3 1670.72 297.677   6
  -1   7  -3 1808.35 288.607  29
  -1   7  -3 2423.49 255.404  25
   1   7   3 2113.47 296.283  29
  -1  -7  -3 1719.85 273.889   8
   1  -7   3 1892.27 298.966   3
   1   7   3 1964.61 288.890  25
  -1  -7  -3 1550.22 234.673  21
   1  -7   3 2369.56 345.077  16
  -1  -7  -3 1578.88 247.038  24
   1  -7   3 1924.56 297.498  21
  -1   7  -3 1587.53 265.166  18
   1   7   3 1708.72 283.874  18
  -1   7  -3 1720.39 288.772   6
   1   7   4 81876.3 2274.74  18
  -1   7  -4 83319.7 2295.96  29
  -1  -7  -4 75080.5 2094.88   8
  -1   7  -4 79652.5 1940.67   2
  -1  -7  -4 80900.8 2222.57  12
   1  -7   4 80636.3 2242.11   3
   1   7   4 76523.0 2157.06  25
  -1   7  -4 82030.2 1893.32  25
  -1  -7  -4 76031.4 2046.78  24
  -1  -7  -4 80395.7 1803.79  20
  -1   7  -4 76302.2 2148.86  15
  -1   7  -4 81619.4 2167.19  18
  -1  -7  -4 84282.8 2164.62  28
   1  -7   4 78463.3 2254.31  16
   1   7   4 79344.6 2241.98   6
   1  -7   4 77628.9 2169.70  21
   1   7   4 78883.6 2126.08  29
   1   7   4 79796.0 2109.96  19
  -1  -7  -4 83330.9 2026.82   3
  -1   7  -4 79672.4 2186.88   6
  -1  -7  -4 78768.2 2005.36  21
  -1   7  -5 183.091 108.957   2
  -1   7  -5 187.478 125.834  15
  -1  -7  -5 226.429 88.5402  20
  -1  -7  -5 218.173 134.356  24
   1   7   5 143.451 112.607  29
  -1  -7  -5 23.5913 90.5945   3
   1   7   5 305.673 200.935  18
   1  -7   5 218.434 154.095   3
  -1   7  -5 806.505 204.403   6
   1  -7   5 244.432 162.663  16
   1   7   5 77.5118 101.785  19
  -1   7  -5 344.327 112.588  25
  -1  -7  -5-110.042 185.107  12
   1   7   5 170.321 166.650  25
   1  -7   5 317.303 164.809  21
   1   7   5 218.968 128.103   6
  -1   7  -5 149.298 109.996  18
  -1  -7  -5 7.88878 108.484  28
  -1  -7  -5-60.6596 143.026   8
  -1  -7  -6 624.384 140.353   3
   1   7   6 513.956 162.664  25
  -1   7  -6 525.824 188.981  15
  -1  -7  -6 659.264 245.426  12
   1   7   6 208.995 125.899  29
   1  -7   6 184.841 163.940  21
  -1   7  -6 556.966 181.643   6
  -1  -7  -6 570.124 203.122   8
  -1   7  -6 329.458 135.736   2
   1  -7   6 373.532 165.170  16
   1  -7   6 646.362 220.639   3
   1   7   6 333.099 139.025  19
  -1   7  -6 523.590 155.673  18
   1   7   6 425.450 206.227   6
   1   7   6 657.444 207.216  18
  -1  -7  -6 422.167 137.684  24
   1   7   7 146.514 195.687  18
  -1   7  -7 21.0147 134.088  27
  -1   7  -7 12.1743 126.761  15
  -1   7  -7 94.5326 108.817   2
  -1  -7  -7 96.8770 116.109  24
  -1   7  -7 164.071 116.627  18
  -1  -7  -7 131.142 130.241  12
  -1  -7  -7-36.2840 136.192   8
   1   7   7 98.9424 102.711  19
   1   7   7-104.821 166.454  25
   1  -7   7 267.062 159.744  21
   1  -7   7 12.5511 134.125   3
  -1   7  -7 22.9903 107.089   6
   1   7   7 189.371 119.178  29
   1   7   7 36.4410 150.511   6
   1  -7   7 205.109 104.366  14
   1  -7   7 58.2557 121.957  16
   1   7   8 24168.9 1143.94  25
   1  -7   8 23640.4 1125.48  16
  -1  -7  -8 23048.4 1132.56  12
   1   7   8 24340.3 1000.96  29
   1  -7   8 22888.2 1118.75  21
  -1   7  -8 21781.3 1001.05   2
  -1   7  -8 22440.8 1112.28  27
  -1  -7  -8 19699.2 982.435   8
   1  -7   8 24030.2 910.281  14
  -1   7  -8 22305.9 1032.52   6
  -1   7  -8 23611.1 986.799  18
   1   7   8 21937.3 1085.28   6
   1   7   8 23995.0 990.708  19
  -1   7  -8 24757.4 935.989  11
   1  -7   8 23829.3 1135.13   3
  -1   7  -8 21914.1 1077.94  15
   1   7   8 23984.1 1145.77  18
  -1  -7  -8 22843.3 1017.32  24
   1   7   9 2634.48 377.845   6
   1   7   9 2820.84 407.203  18
   1   7   9 2677.72 335.367  19
  -1   7  -9 2711.74 355.939   2
  -1   7  -9 3035.42 343.257  18
   1  -7   9 2283.05 278.153  14
  -1  -7  -9 3082.33 363.969   4
  -1   7  -9 2612.65 387.352  27
  -1  -7  -9 3360.73 438.000  12
  -1  -7  -9 2545.76 345.552  24
  -1   7  -9 3330.55 317.491  11
  -1   7  -9 2526.39 385.469  15
   1  -7   9 3691.23 443.411  16
   1  -7   9 1753.46 306.535   3
  -1  -7  -9 2899.54 370.949   8
   1  -7   9 2328.12 374.584  21
   1   7   9 2452.64 306.771  29
   1   7   9 2824.53 409.106  25
  -1  -7 -10 27593.9 1300.37  12
   1   7  10 28945.6 1100.20  29
  -1   7 -10 27398.1 1214.74   2
   1   7  10 26918.2 1266.49  18
  -1  -7 -10 27586.4 1170.26   4
   1   7  10 26757.1 1243.86   6
   1  -7  10 27196.1 1268.92  21
  -1  -7 -10 24742.2 1149.23   8
  -1  -7 -10 27071.1 1171.12  24
   1  -7  10 28936.0 1297.75  16
   1   7  10 28321.2 1107.19  19
  -1   7 -10 27148.2 1276.55  27
   1  -7  10 27561.6 1270.82   3
   1   7  10 27767.3 1268.48   5
   1  -7  10 28203.2 1099.92  14
   1   7  10 27707.7 1306.04  25
  -1   7 -10 27390.1 1270.41  15
   1   7  11 3123.44 428.513   6
  -1  -7 -11 2966.42 393.326  24
  -1   7 -11 2651.92 402.310  15
  -1  -7 -11 2796.53 382.358   8
   1  -7  11 2911.63 405.296   3
   1   7  11 2413.92 393.219  25
  -1   7 -11 3033.67 408.152   2
   1  -7  11 2854.44 347.730  14
  -1  -7 -11 2567.71 404.062  12
   1  -7  11 4120.16 467.776   1
   1  -7  11 2894.27 423.701  21
   1   7  11 3206.24 448.561   5
   1  -7  11 3028.65 432.671  16
  -1   7 -11 2632.95 399.328  27
   1   7  11 3149.15 437.189  18
  -1  -7 -11 2820.58 375.430   4
  -1  -7 -12 9351.94 709.790   8
  -1  -7 -12 9864.92 793.469  12
  -1  -7 -12 9608.53 706.764  24
   1  -7  12 11045.4 804.506  16
   1   7  12 9904.22 756.372   6
  -1   7 -12 11036.0 800.101   2
   1   7  12 10808.1 807.136  18
  -1  -7 -12 10463.5 748.219   4
   1   7  12 10578.3 791.487   5
   1  -7  12 9924.16 680.921  14
   1  -7  12 10411.8 784.319   3
  -1   7 -12 10854.8 799.140  27
   1  -7  12 10549.8 772.104   1
   1   7  12 9858.59 795.218  25
   1  -7  12 10541.6 805.869  21
  -1   7 -12 9163.53 756.126  15
  -1  -7 -13 217.620 166.762   4
   1   7  13 197.651 179.817   6
   1  -7  13 235.707 175.170   3
   1   7  13 238.694 191.620   5
   1  -7  13 13.2670 163.552   1
   1  -7  13 85.7195 153.767  16
  -1   7 -13 296.388 196.977   2
  -1  -7 -13 284.794 170.404   8
   1  -7  13-12.5100 146.811  14
   1  -7  13 19.0280 184.232  21
   1   7  13-83.1824 189.648  25
  -1  -7 -13 54.2537 126.056  24
  -1   7 -13 192.298 187.007  15
  -1  -7 -13 353.930 231.684  12
   1   7  13 123.560 148.719  18
  -1   7 -13 333.291 181.547  27
   1   7  14 4163.27 520.840   5
   1  -7  14 3573.83 477.080   3
  -1  -7 -14 3831.80 472.261  24
   1   7  14 4478.38 567.295  25
   1  -7  14 3277.86 469.614  21
   1  -7  14 3614.04 450.608  14
  -1   7 -14 3893.09 513.321   2
   1  -7  14 4369.97 543.018   1
  -1   7 -14 3923.08 528.794  15
  -1  -7 -14 4482.56 552.288  12
   1  -7  14 5406.10 588.372  16
   1   7  14 4027.05 526.946  18
  -1  -7 -14 2845.59 420.062   8
  -1   7 -14 4208.01 513.456  27
   1   7  14 3551.31 480.215   6
  -1  -7 -14 4763.76 543.973   4
  -1   7 -15 90.8966 181.271   2
   1  -7  15-53.8565 161.995   1
   1  -7  15 52.0106 169.930  21
   1  -7  15 635.583 240.643  16
  -1  -7 -15-7.59864 159.815  24
  -1  -7 -15 92.7230 172.232  12
   1   7  15-240.862 233.680  25
   1  -7  15-61.4424 149.483  14
  -1   7 -15 194.920 165.118  15
   1   7  15 298.110 209.346   6
   1  -7  15 451.166 218.805   3
   1   7  15-10.5773 162.898  18
   1   7  15 207.863 219.167   5
  -1  -7 -15 101.977 150.811   8
  -1   7 -15 136.437 152.355  27
   1   7  16 14871.9 1019.76   5
  -1  -7 -16 14130.5 1054.95  12
  -1   7 -16 13074.6 999.895  15
   1   7  16 14216.2 1005.98  18
   1   7  16 14171.9 1055.88  25
  -1  -7 -16 13315.2 928.638  24
   1  -7  16 14425.3 1039.03  21
  -1   7 -16 14590.6 995.898  27
   1   7  16 15681.4 1039.18   6
   1  -7  16 13698.2 1017.95   1
   1  -7  16 13519.0 942.846  14
   1  -7  16 17179.6 1052.28   3
  -1  -7 -16 12747.9 924.516   8
   1  -7  16 15002.2 1023.95  16
   1  -7  17 294.451 194.937  16
  -1  -7 -17 384.676 204.013   8
   1   7  17 556.336 246.323  18
  -1   7 -17 266.672 224.087  15
   1   7  17 671.878 257.490   5
   1   7  17 165.907 176.805  25
  -1   7 -17 571.166 247.795  27
   1  -7  17 113.295 169.733  14
   1  -7  17-63.2299 220.724   1
  -1  -7 -17 608.197 236.285  12
   1   7  17 600.134 217.900   6
  -1  -7 -17 483.775 231.557  24
  -1  -7 -18 1265.43 325.599   8
   1  -7  18 622.092 273.882  14
   1  -7  18 625.834 275.525   1
  -1   7 -18 1061.40 339.925  15
  -1  -7 -18 901.562 319.396  12
   1   7  18 1058.43 321.417  18
  -1  -7 -18 1132.58 309.436  24
   1   7  18 941.114 324.848  25
  -1   7 -18 1264.31 343.528  27
   1   7  18 572.892 252.187   6
   1  -7  18 1460.30 370.760  21
   1   7  18 1315.72 346.530   5
  -1   7 -19 533.014 252.448  15
   1  -7  19 373.239 273.743   1
   1   7  19 506.782 254.750   5
   1  -7  19 495.700 287.313  14
   1   7  19 148.317 183.201  23
   1   7  19 796.572 360.567  25
   1  -7  19 619.183 261.291  21
  -1  -7 -19 185.061 169.915   8
  -1  -7 -19 913.689 335.926  12
  -1  -7 -19 585.341 243.728  24
   1   7  19 450.582 230.271   6
   1   7  20 262.233 268.470  25
   1   7  20 48.8088 154.436  23
   1  -7  20 363.488 232.991   1
  -1  -7 -20 248.349 159.334  12
   1  -7  20 295.761 188.511  14
  -1  -7 -20 338.798 236.468  24
   1   7  20-113.418 191.366   5
   1  -7  20 355.618 207.366  21
  -1   7 -20-65.2294 187.269  15
   1  -9 -19 447.872 229.191  24
  -1  -9  19 43.6562 187.982  21
  -1  -9  19-5.37006 162.976   1
  -1   9  19 783.155 284.403   6
  -1  -9  19 682.199 273.285  16
   1  -9 -19 414.094 221.023   8
   1   9 -19 1219.71 360.693  27
  -1   9  19 1204.12 335.442  18
   1   9 -18 74.0285 174.518  15
  -1   9  18 0.98344 160.353  18
  -1  -9  18 349.911 263.830  16
   1  -9 -18 161.499 192.499  12
  -1  -9  18 80.3592 186.363   1
  -1  -9  18 130.918 226.705  21
  -1   9  18 117.507 210.966  25
   1   9 -18 164.501 195.307  27
   1  -9 -18 183.851 179.972  24
  -1  -9  18 302.634 244.582   3
   1  -9 -18 103.818 190.349   8
  -1   9  18 183.632 223.793   6
  -1   9  17 9047.69 897.833  25
   1  -9 -17 9851.03 872.084  24
  -1  -9  17 9919.33 886.338   3
  -1  -9  17 11085.7 981.593  16
  -1   9  17 10609.1 926.287  18
   1   9 -17 9650.88 905.087  27
  -1   9  17 9810.85 897.498   6
  -1  -9  17 8540.87 814.351   1
   1  -9 -17 9246.95 823.574   8
  -1  -9  17 10152.3 913.934  21
   1  -9 -17 10087.6 972.717  12
   1   9 -17 8228.62 869.207  15
   1  -9 -16 2322.20 416.340   8
   1  -9 -16 2569.34 451.144  24
  -1   9  16 2086.39 416.468   6
  -1   9  16 1969.33 426.143  18
   1   9 -16 2150.97 449.201  27
  -1  -9  16 1822.23 397.201   1
   1  -9 -16 1914.55 435.088  12
  -1  -9  16 2371.29 454.002  16
   1   9 -16 1357.98 389.917  15
  -1  -9  16 2102.64 419.703   3
  -1  -9  16 2006.07 428.488  21
  -1   9  16 2296.36 459.026  25
   1   9 -15 1753.30 408.663  27
  -1   9  15 885.136 290.514  18
   1  -9 -15 1128.71 301.588   8
  -1   9  15 1425.01 389.103  25
  -1  -9  15 1399.28 348.436   3
  -1   9  15 1078.46 306.918   6
  -1  -9  15 1314.97 355.626  16
   1  -9 -15 1163.32 299.434  24
   1   9 -15 1395.57 376.666  15
  -1  -9  15 863.506 290.138   1
   1  -9 -15 1259.37 390.742  12
  -1  -9  15 1230.44 330.750  21
   1   9 -14-176.445 209.907  27
  -1  -9  14 85.1451 143.843   1
   1  -9 -14 235.986 178.834   8
  -1   9  14-66.2518 167.983  25
  -1  -9  14-134.062 208.042  21
   1  -9 -14-94.7150 187.906  24
   1  -9 -14 18.8989 183.887  12
  -1   9  14-56.3693 203.425   6
   1   9 -14 108.922 186.648  15
  -1   9  14-215.883 176.760  18
  -1  -9  14 94.6690 147.349   3
  -1  -9  14 203.913 197.922  16
  -1  -9  13 208.915 176.765   3
  -1   9  13 354.673 208.710  18
   1  -9 -13-199.130 174.307   8
  -1  -9  13-64.4980 173.745  21
   1  -9 -13 13.9331 185.187  12
  -1  -9  13 341.497 218.939  16
  -1  -9  13-127.130 165.503   1
  -1   9  13-140.160 234.839  25
   1   9 -13-51.6460 207.514  27
   1  -9 -13-53.9920 144.360  24
   1   9 -13-246.616 230.501  15
  -1   9  13 1.25941 195.780   6
  -1  -9  12 181.999 205.512  16
  -1   9  12 139.896 163.767  18
   1  -9 -12-108.438 181.341   8
   1   9 -12 68.7843 177.752  27
  -1   9  12-86.9415 201.816   6
  -1   9  12-156.013 212.638  25
  -1  -9  12 123.744 213.639   3
  -1  -9  12 29.0041 207.423  21
  -1  -9  12-95.9292 173.276   1
   1   9 -12 56.9440 175.928  15
   1  -9 -12-191.282 250.310  12
   1  -9 -12 27.7645 142.936  24
  -1   9  11 11985.9 900.251  25
  -1   9  11 15023.7 893.080  19
  -1  -9  11 12266.4 928.119   3
  -1   9  11 11318.0 900.079  18
  -1   9  11 12186.2 917.696   6
   1  -9 -11 13188.8 995.764  12
  -1  -9  11 13009.5 835.839   1
   1   9 -11 14140.1 1002.29  27
  -1  -9  11 14118.4 1008.90  16
   1   9 -11 11905.7 910.157  15
  -1  -9  11 13947.9 975.016  21
   1  -9 -11 12457.6 874.545  24
   1  -9 -11 11364.9 812.843   8
   1  -9 -10 1103.08 295.446  24
   1  -9 -10 711.652 257.051  12
  -1  -9  10 1271.84 324.059  16
   1   9 -10 690.194 272.245  27
  -1  -9  10 1578.97 348.932  21
  -1   9  10 912.614 277.180   6
  -1  -9  10 770.188 234.406   3
   1   9 -10 839.329 273.016  15
  -1  -9  10 945.745 235.820   1
  -1   9  10 1445.77 339.939  18
   1  -9 -10 385.728 189.065   8
  -1   9  10 1031.66 288.924  25
  -1   9  10 1069.97 258.123  19
  -1   9   9 11119.2 729.219  29
   1   9  -9 8702.66 749.884  15
  -1   9   9 10573.5 743.041  19
  -1   9   9 11319.0 854.396   6
   1  -9  -9 10027.0 757.745  24
   1  -9  -9 9095.88 705.081   8
  -1  -9   9 9860.96 667.945   1
   1   9  -9 10968.4 858.128  27
  -1  -9   9 9651.61 790.175   3
  -1  -9   9 10332.9 809.240  21
   1   9  -9 9829.83 776.084   6
  -1   9   9 10857.8 857.463  18
   1  -9  -9 10137.7 832.583  12
  -1   9   9 9497.52 760.857  25
  -1  -9   9 11770.3 891.492  16
  -1  -9   8 7805.62 696.561   3
   1  -9  -8 7935.71 656.695  24
  -1   9   8 7648.32 626.438  19
   1  -9  -8 6565.90 668.411  12
  -1   9   8 7985.81 719.660  18
   1   9  -8 7374.21 671.222  15
   1   9  -8 7134.72 694.662  27
  -1  -9   8 7693.94 711.547  16
  -1   9   8 7156.93 681.774   6
   1  -9  -8 5878.77 553.140   8
  -1  -9   8 6509.49 634.545  21
  -1   9   8 6984.09 583.575  29
   1   9  -8 7754.38 681.298   6
  -1   9   8 6777.24 629.484  25
  -1  -9   8 7364.96 554.722   1
   1   9  -8 7541.95 602.760  18
   1   9  -7 61.5669 169.355   6
   1   9  -7 175.969 180.696  29
  -1  -9   7 127.910 154.810  21
  -1   9   7 144.135 188.785   6
   1  -9  -7 182.361 157.562   8
   1  -9  -7 238.477 197.515  12
   1   9  -7 373.780 219.981  27
  -1   9   7 56.0448 158.683  18
   1   9  -7-1.68013 115.989  18
  -1  -9   7 333.071 193.940  16
   1  -9  -7 213.983 156.890  24
  -1   9   7 156.555 146.924  29
   1   9  -7 52.1968 149.926  15
  -1  -9   7 205.089 177.657   3
  -1   9   7 150.292 155.096  25
  -1   9   7 168.620 116.458  19
  -1   9   6 216.249 164.432  19
  -1  -9   6 271.484 167.797  16
   1   9  -6 470.213 182.430  18
   1   9  -6 428.571 205.237  29
  -1  -9   6 230.396 182.138  21
   1  -9  -6 497.611 158.626  21
  -1   9   6 397.044 189.395  25
   1   9  -6 264.643 191.488  27
   1   9  -6 250.097 164.747   6
   1  -9  -6 669.857 189.131   3
  -1  -9   6 353.824 193.082   3
  -1   9   6 572.806 183.513  29
   1  -9  -6 352.930 183.265   8
   1  -9  -6 529.525 219.591  28
  -1   9   6 635.788 243.650   6
   1  -9  -6 561.015 235.854  12
   1   9  -6 420.162 187.363  15
  -1   9   6 483.752 214.367  18
   1  -9  -6 405.586 189.235  24
   1   9  -5 8618.93 706.922   6
   1  -9  -5 9507.18 684.486  24
   1   9  -5 11441.8 813.835  29
  -1   9   5 11721.9 837.352  18
  -1  -9   5 9440.89 774.530  16
   1  -9  -5 9451.57 745.688  12
  -1  -9   5 10146.8 760.645   3
   1  -9  -5 10014.8 633.080  21
  -1   9   5 9598.32 701.790  25
   1  -9  -5 9671.47 729.935  28
  -1   9   5 10566.1 744.993  19
   1   9  -5 8243.51 676.460  15
   1  -9  -5 9229.16 673.745   8
   1  -9  -5 11074.2 702.851   3
  -1  -9   5 9305.96 710.802  21
   1   9  -5 9804.73 614.280  25
  -1   9   5 9731.12 757.325   6
   1   9  -5 9374.91 683.689  18
  -1   9   5 10692.5 734.019  29
   1   9  -4 9641.34 610.729  25
  -1   9   4 8548.08 718.973   6
  -1  -9   4 10007.4 782.655  16
   1  -9  -4 7477.20 606.806  24
   1  -9  -4 8972.50 697.518  28
   1  -9  -4 9292.59 651.865   3
  -1  -9   4 8761.23 698.155   3
  -1   9   4 8579.99 663.366  29
   1   9  -4 8469.33 707.903  29
  -1   9   4 7970.82 647.527  19
  -1  -9   4 8422.46 667.484  21
  -1   9   4 9294.66 736.317  18
   1  -9  -4 8522.64 695.271  12
   1   9  -4 9064.50 716.816   6
   1  -9  -4 9558.83 629.541  21
  -1   9   4 7539.80 611.068  25
   1  -9  -4 7697.43 605.889   8
  -1  -9   4 8406.00 617.932  12
   1   9  -4 9130.50 675.336  18
  -1   9   3 26800.3 1283.62  18
   1  -9  -3 28439.9 1192.42   3
  -1   9   3 25569.3 1207.83  19
   1  -9  -3 27525.1 1249.98  28
   1  -9  -3 26735.0 1166.23  24
   1  -9  -3 27008.4 1249.06  12
   1  -9  -3 24420.7 1125.05   8
  -1  -9   3 29385.7 1113.85  10
   1  -9  -3 25952.8 1100.50  21
   1   9  -3 28748.9 1314.41  29
   1   9  -3 27117.6 1282.95   6
  -1   9   3 26547.7 1272.68   6
  -1  -9   3 25619.8 1219.90   3
  -1   9   3 27373.5 1157.77  25
  -1   9   3 27837.0 1239.49  29
   1   9  -3 28265.3 1238.13  18
   1   9  -3 25995.5 1072.66  25
  -1  -9   3 25860.6 1183.60  21
  -1  -9   3 26528.3 1145.29  12
  -1  -9   3 28204.3 1349.67  16
  -1   9   2 1762.81 318.815  29
   1  -9  -2 1066.60 238.068  24
  -1  -9   2 1125.56 305.108  16
   1  -9  -2 1227.28 273.004  28
  -1  -9   2 1228.18 279.307   8
   1  -9  -2 1366.67 303.780  12
  -1   9   2 925.573 265.699   6
   1  -9  -2 1027.28 220.263  21
   1   9  -2 1113.21 251.532  18
  -1   9   2 1249.14 275.338  19
  -1  -9   2 850.033 222.877  12
   1  -9  -2 835.971 233.321   8
  -1   9   2 1411.64 307.911  18
   1   9  -2 1139.44 233.467  25
  -1  -9   2 1481.54 292.608   3
  -1  -9   2 1048.68 244.479  21
   1   9  -2 1881.47 348.466  29
  -1   9   2 1581.99 271.997  25
   1  -9  -2 1267.57 250.638   3
   1   9  -2 1629.55 320.230   6
   1  -9  -1 2891.50 389.088  12
  -1  -9   1 2884.43 426.685  16
   1   9  -1 3635.38 455.673  29
  -1   9   1 3699.95 454.546  18
   1   9  -1 3047.11 435.314   6
   1   9  -1 3850.29 454.882  18
   1   9  -1 3406.60 383.182  25
   1  -9  -1 3103.83 421.581  28
  -1  -9   1 3025.01 386.657  21
  -1  -9   1 3608.27 438.970   3
  -1   9   1 3449.85 380.413  25
   1  -9  -1 3280.79 388.819  21
  -1   9   1 2724.75 395.904  29
  -1  -9   1 3765.70 444.981  28
   1  -9  -1 2862.64 377.497   8
  -1   9   1 3442.42 447.822   6
  -1  -9   1 3284.57 426.144   8
   1  -9  -1 3412.07 415.554   3
  -1  -9   1 3381.75 401.464  12
  -1  -9   0 289.233 168.328  24
   1  -9   0 607.580 215.854   3
   1  -9   0 455.896 206.981  12
   1   9   0 42.0984 157.356   6
   1   9   0 236.142 163.809  25
  -1  -9   0 70.1498 136.112  12
  -1  -9   0 269.239 164.930  21
  -1   9   0 293.413 192.678  29
   1  -9   0 544.664 203.482  21
  -1  -9   0 184.873 155.991   8
   1   9   0 126.383 158.795  18
   1  -9   0 269.656 173.046  28
  -1   9   0 259.291 131.135  25
   1   9   0 415.340 199.452  29
  -1   9   0-18.2896 190.051   6
  -1   9   0 397.972 192.742  18
  -1  -9   0 179.689 150.236   3
   1  -9   0 409.616 171.099   8
  -1  -9   0 264.263 143.942  28
   1   9   1 7177.64 648.432   6
   1  -9   1 7777.31 684.591  16
   1  -9   1 6265.48 559.222  12
   1  -9   1 7246.93 614.099   3
  -1   9  -1 7524.11 640.258  18
   1   9   1 7337.29 621.508  29
  -1  -9  -1 7786.09 606.767   3
  -1  -9  -1 7160.28 553.160  24
   1  -9   1 7475.24 529.930  10
   1   9   1 7493.29 644.811  18
  -1  -9  -1 7570.89 585.256  21
   1  -9   1 8210.16 622.542  21
  -1   9  -1 7678.60 540.905  25
   1  -9   1 6507.07 562.343   8
  -1   9  -1 7736.17 655.486   6
  -1  -9  -1 6677.55 583.338  12
  -1  -9  -1 6495.14 570.186   8
   1   9   1 7683.35 598.342  25
  -1   9  -1 7388.02 642.885  29
  -1  -9  -1 7093.01 592.811  28
  -1   9  -2 6833.61 625.895   6
   1   9   2 7876.01 618.632  25
  -1  -9  -2 7616.42 586.689  21
  -1   9  -2 7880.35 665.832  29
  -1   9  -2 7248.53 613.226  18
  -1  -9  -2 8517.14 628.117   3
   1  -9   2 7367.45 668.229  16
  -1  -9  -2 6362.46 563.925   8
  -1  -9  -2 7186.46 610.762  12
   1  -9   2 7174.64 592.767  21
  -1  -9  -2 8072.07 632.415  28
   1  -9   2 7287.11 622.897   3
  -1  -9  -2 7514.50 569.293  24
   1  -9   2 7061.61 536.921  10
   1   9   2 7083.18 618.388  29
   1   9   2 8306.04 695.853   6
  -1   9  -2 8028.75 537.840  25
   1   9   2 6857.14 630.543  18
   1   9   3 31010.6 1406.61  18
   1  -9   3 33772.1 1496.33  16
  -1  -9  -3 34030.1 1309.28   3
  -1   9  -3 33806.2 1443.77  29
   1   9   3 33082.7 1377.99  29
   1  -9   3 31136.0 1376.26   3
   1  -9   3 30214.8 1303.92  21
  -1  -9  -3 28678.9 1273.35   8
  -1  -9  -3 32367.6 1354.95  28
   1   9   3 32228.5 1441.98   6
  -1  -9  -3 31952.6 1264.23  24
   1  -9   3 33668.0 1278.15  10
  -1   9  -3 30700.4 1310.78  15
  -1  -9  -3 33286.3 1281.59  21
   1   9   3 32021.6 1336.12  25
  -1   9  -3 34962.7 1404.16  18
  -1   9  -3 33595.4 1425.94   6
  -1  -9  -3 31286.5 1364.38  12
  -1   9  -4 2847.92 392.235  15
   1   9   4 3614.98 432.294  25
  -1   9  -4 3026.33 386.106  18
  -1  -9  -4 2679.02 372.601  28
   1   9   4 2977.13 394.154  19
   1   9   4 3687.78 475.457   6
  -1  -9  -4 2509.74 383.667  12
   1  -9   4 2305.26 370.862  21
  -1  -9  -4 2607.41 388.030   8
   1  -9   4 3008.96 420.752   3
  -1  -9  -4 3733.44 400.385   3
  -1   9  -4 2817.76 400.855   6
  -1  -9  -4 2434.09 350.564  24
   1   9   4 3392.64 449.535  18
   1  -9   4 2923.07 419.243  16
   1  -9   4 3302.84 392.255  10
   1   9   4 3084.65 406.304  29
  -1  -9  -4 3169.49 371.604  21
   1   9   5 8958.29 738.505   6
  -1  -9  -5 9875.62 721.493  28
   1  -9   5 9295.41 722.133  21
   1  -9   5 10241.7 799.209  16
  -1  -9  -5 8158.31 656.717   8
   1   9   5 9863.04 779.827  18
  -1   9  -5 9584.29 702.873  18
   1   9   5 7820.51 627.711  19
   1   9   5 8919.44 702.275  25
  -1   9  -5 8490.27 678.600  15
  -1  -9  -5 9813.08 644.612   3
  -1  -9  -5 8326.57 636.795  24
  -1   9  -5 9365.09 728.611   6
  -1  -9  -5 9486.91 753.272  12
   1  -9   5 9613.95 749.056   3
   1   9   5 8555.06 663.140  29
   1  -9   6 2010.82 370.345  16
   1  -9   6 2257.13 375.917   3
   1   9   6 1526.75 276.720  19
   1  -9   6 1929.41 361.105  21
   1   9   6 1957.86 321.131  29
  -1  -9  -6 1459.14 287.786  24
  -1   9  -6 1498.43 303.577  15
  -1   9  -6 2191.48 370.498   6
   1   9   6 1880.45 360.164   6
  -1  -9  -6 1198.21 299.858   8
  -1   9  -6 1857.94 336.480  18
  -1  -9  -6 1592.27 350.113  12
   1   9   6 1762.20 340.404  25
   1   9   6 1584.05 337.877  18
   1   9   7 9.68835 153.484  18
  -1   9  -7 209.451 129.209   2
  -1  -9  -7 165.190 152.638   8
  -1  -9  -7-91.4685 197.906  12
   1   9   7 46.0454 99.9771  19
  -1  -9  -7-178.369 154.070  24
   1   9   7 137.384 176.919   6
  -1   9  -7 51.4207 141.771  15
   1  -9   7 206.549 188.074   3
   1  -9   7-18.2223 110.176   1
   1  -9   7 378.514 190.017  16
   1  -9   7-22.2455 158.666  21
   1   9   7 102.485 118.037  29
   1   9   7 444.420 193.871  25
  -1   9  -7 219.489 145.232  27
  -1   9  -7 234.794 166.254  18
  -1   9  -7-77.7528 161.830   6
  -1  -9  -8 134.209 146.472  24
   1   9   8 295.831 184.173  18
  -1   9  -8 220.077 153.396  18
   1  -9   8-234.823 205.814  21
   1   9   8 219.224 132.713  29
  -1   9  -8 440.381 184.115   6
   1   9   8 60.5135 158.387   6
   1  -9   8 313.821 218.233  16
  -1   9  -8 203.468 130.333   2
  -1   9  -8 263.151 200.891  15
   1  -9   8 116.790 109.018   1
   1   9   8 224.932 186.222  25
  -1  -9  -8 128.123 168.622  12
   1   9   8 294.094 167.223  19
   1  -9   8 220.029 195.658   3
  -1   9  -8 18.9107 160.944  27
  -1  -9  -8 145.386 151.734   8
  -1  -9  -9 12509.7 835.646  24
  -1   9  -9 13832.0 980.004  27
   1  -9   9 11892.6 777.365   1
  -1   9  -9 10386.8 830.874  15
   1  -9   9 14513.0 1000.37  16
   1   9   9 11519.9 871.851  25
  -1  -9  -9 11473.4 906.505  12
   1  -9   9 11815.7 881.059  21
  -1   9  -9 13955.7 831.152   2
   1   9   9 13373.8 817.543  29
   1   9   9 13546.9 953.972   6
  -1  -9  -9 10869.1 804.459   8
   1  -9   9 13409.4 942.219   3
   1   9   9 13701.8 977.470  18
   1  -9  10 7204.52 705.035  21
   1   9  10 7352.07 717.320  25
  -1  -9 -10 7598.35 664.002  24
  -1  -9 -10 8203.63 778.330  12
   1  -9  10 7338.76 627.422   1
  -1   9 -10 7035.52 714.843  27
  -1   9 -10 7060.23 617.267   2
   1   9  10 8020.77 740.573   6
   1  -9  10 8075.75 747.167   3
   1  -9  10 8256.87 759.266  16
  -1  -9 -10 7346.26 667.588   8
   1   9  10 8177.83 754.717  18
  -1   9 -10 5855.60 633.266  15
  -1   9 -11 10667.5 881.587  27
   1   9  11 9433.79 829.684  18
   1  -9  11 9806.47 739.529   1
  -1  -9 -11 7150.90 673.762   8
   1   9  11 8123.80 760.991   6
  -1  -9 -11 8821.37 825.732  12
   1  -9  11 8119.62 765.996  21
   1   9  11 8472.61 786.307  25
  -1  -9 -11 8761.95 731.883  24
   1  -9  11 10309.9 853.430   3
  -1   9 -11 8646.14 783.083  15
   1  -9  11 10168.3 859.562  16
   1  -9  12 26.4367 162.653   3
  -1  -9 -12-154.412 196.557   8
   1   9  12 272.797 197.502  18
  -1   9 -12 151.632 183.648  27
   1   9  12 32.8454 179.695  25
   1  -9  12 134.730 188.939  21
   1  -9  12 194.410 197.579  16
   1   9  12 10.0022 183.554   6
  -1   9 -12-47.1866 175.448  15
   1  -9  12 48.4234 174.127   1
  -1  -9 -12 69.6951 161.177  24
  -1  -9 -12 175.335 220.809  12
   1  -9  13 242.991 249.137  21
  -1   9 -13 177.940 181.187  27
   1  -9  13-3.88183 154.539   3
  -1   9 -13-13.7132 164.018  15
   1   9  13 45.3453 153.578  18
   1  -9  13 159.971 176.611   1
  -1  -9 -13-86.2291 161.695  24
   1   9  13-42.1101 183.118  25
   1  -9  13-63.9716 149.362  16
  -1  -9 -13 135.245 215.805   8
  -1  -9 -13 41.5391 170.857  12
   1   9  13 99.7914 188.992   6
   1   9  14 423.122 222.933  18
   1   9  14 678.129 283.585  25
   1   9  14 449.822 236.899   6
   1  -9  14 718.020 281.904  16
  -1   9 -14 745.736 286.294  15
  -1  -9 -14 896.773 315.846  12
   1  -9  14 452.818 221.759   3
  -1   9 -14 994.695 310.518  27
   1  -9  14 592.247 253.582  21
  -1  -9 -14 496.462 215.849   8
  -1  -9 -14 555.865 228.889  24
   1  -9  14 596.727 258.564   1
   1   9  15 765.143 327.744  25
   1  -9  15 600.682 227.618   3
   1   9  15 859.488 300.779  18
  -1   9 -15 656.865 273.196  27
  -1  -9 -15 776.072 310.431  12
   1   9  15 767.590 281.528   6
   1  -9  15 1149.33 328.598  21
  -1   9 -15 720.800 307.766  15
  -1  -9 -15 754.228 261.054  24
  -1  -9 -15 659.626 292.287   8
   1  -9  15 897.718 294.900  16
   1  -9  15 398.923 233.153   1
   1  -9  16 3932.69 570.306   3
   1  -9  16 3335.76 517.376   1
  -1  -9 -16 4387.46 653.336  12
  -1  -9 -16 2736.75 482.596   8
   1   9  16 5434.34 697.201  25
   1  -9  16 4747.33 629.251  16
  -1  -9 -16 3637.47 530.249  24
   1   9  16 4199.59 611.160  18
   1  -9  16 4472.62 617.602  21
   1   9  16 5116.02 645.086   6
  -1   9 -16 3633.98 570.069  15
  -1   9 -16 3826.26 587.427  27
  -1  -9 -17 2184.36 421.914  24
   1   9  17 2846.98 497.996   6
  -1   9 -17 2502.11 517.453  15
   1  -9  17 2066.42 416.076   1
   1   9  17 2325.21 465.263  18
  -1  -9 -17 2279.07 457.499   8
   1  -9  17 3230.39 553.763  21
   1   9  17 2414.40 496.944  25
   1  -9  17 2457.10 475.752  16
   1  -9  17 2527.11 469.717   3
  -1  -9 -17 1849.83 437.974  12
  -1   9 -17 2926.60 516.436  27
   1   9  18 366.425 236.389   6
  -1   9 -18 175.031 212.298  27
   1   9  18 160.213 185.569  18
  -1  -9 -18 237.362 209.212  24
  -1 -11  15 3532.31 580.836   3
  -1  11  15 2111.48 453.270  18
   1 -11 -15 2867.83 481.456   8
   1  11 -15 2714.64 535.684  27
  -1  11  15 2342.13 488.728  25
  -1 -11  15 2247.04 472.863  16
   1 -11 -15 2743.43 490.144  24
  -1  11  15 3344.37 576.921   6
  -1  11  14 292.818 202.680  25
   1  11 -14-79.4492 211.773  27
  -1 -11  14 360.099 267.413  21
   1 -11 -14 33.4227 187.628  24
   1 -11 -14-64.9722 158.279   8
   1 -11 -14 460.310 264.661  12
  -1  11  14 78.5660 176.676  18
  -1 -11  14-8.23436 170.642  16
  -1  11  14 125.495 181.364   6
   1  11 -14 219.079 217.155  15
  -1 -11  14-67.0613 155.366   3
   1  11 -13 575.691 304.457  15
  -1  11  13 584.995 298.679   6
   1  11 -13 30.6561 212.160  27
  -1  11  13 868.679 316.487  25
  -1 -11  13 290.803 234.743  16
  -1  11  13 729.268 306.065  18
   1 -11 -13 31.3293 276.183  12
  -1 -11  13 294.942 230.676  21
   1 -11 -13 246.262 187.280  24
  -1 -11  13 585.320 276.930   3
   1 -11 -13-136.483 200.553   8
  -1  11  12 1262.01 348.840  25
   1 -11 -12 1522.37 380.484  12
   1  11 -12 1026.49 322.615  15
  -1  11  12 1157.16 349.396   6
   1 -11 -12 752.715 230.650   8
   1 -11 -12 1311.41 322.019  24
   1  11 -12 2046.13 446.966  27
  -1 -11  12 1389.13 360.319  16
  -1  11  12 1589.59 397.731  18
  -1 -11  12 1139.71 335.110  21
  -1 -11  12 1246.50 333.478   3
   1 -11 -11 5583.31 625.182  24
   1 -11 -11 5289.49 692.645  12
  -1  11  11 5357.87 692.482  18
   1  11 -11 4787.54 609.399  15
  -1 -11  11 6548.53 753.126  16
   1 -11 -11 4717.48 563.429   8
   1  11 -11 6962.97 785.233  27
  -1 -11  11 5541.88 671.420   3
  -1  11  11 6437.87 725.703   6
  -1 -11  11 5349.12 639.979  21
  -1  11  11 5203.22 634.634  25
  -1 -11  10 784.942 289.870  21
  -1 -11  10 1148.00 343.239  16
   1  11 -10 746.456 300.068  27
  -1  11  10 1775.59 396.922  25
  -1 -11  10 1014.86 317.139   3
   1 -11 -10 1112.71 305.135   8
   1 -11 -10 748.383 310.403  12
  -1  11  10 223.761 222.776  18
  -1  11  10 578.363 302.829   6
   1 -11 -10 387.175 171.307  24
   1  11 -10 897.509 330.445  15
   1 -11  -9 5117.60 580.179  24
  -1  11   9 5994.89 690.746   6
   1  11  -9 4710.63 637.756  27
   1  11  -9 4801.64 592.564  15
   1 -11  -9 5193.60 572.294   8
  -1 -11   9 5742.51 667.105   3
   1 -11  -9 5259.74 661.276  12
  -1  11   9 4895.91 598.068  25
  -1 -11   9 4694.60 583.637  21
  -1  11   9 5102.50 571.961  19
  -1  11   9 6020.14 699.126  18
   1  11  -9 5653.63 659.391   6
  -1 -11   9 5928.62 707.535  16
  -1  11   8 1353.92 318.480  25
   1  11  -8 1081.56 289.087  15
   1  11  -8 1316.36 336.045   6
   1 -11  -8 1311.11 377.537  12
  -1  11   8 1129.12 287.391  19
   1 -11  -8 906.964 271.244   8
  -1  11   8 920.203 333.551  18
  -1 -11   8 641.062 237.197  21
   1  11  -8 1060.93 310.370  27
  -1  11   8 576.811 244.548   6
   1 -11  -8 709.713 242.712  24
  -1 -11   8 1325.58 338.532   3
  -1 -11   8 1398.80 322.780  10
  -1 -11   8 1110.35 347.745  16
  -1  11   8 848.792 232.479  29
  -1 -11   7 230.808 185.932   3
  -1 -11   7 1.87957 182.238  16
   1  11  -7-78.7417 218.543   6
  -1  11   7 28.4856 121.693  29
  -1 -11   7 99.6166 174.473  21
   1  11  -7-97.2628 166.368  27
  -1  11   7 95.2272 226.992  18
   1 -11  -7 223.191 176.956  24
   1 -11  -7-120.562 220.692  12
  -1  11   7 212.416 195.307   6
   1 -11  -7 258.601 188.398   8
  -1  11   7-10.8969 155.150  25
   1  11  -7 60.7645 133.826  15
  -1  11   6 346.057 175.216  25
   1 -11  -6 298.382 181.337   8
   1 -11  -6 325.424 177.371  24
  -1  11   6 423.562 225.121   6
  -1 -11   6 122.925 150.522  16
   1 -11  -6-105.864 223.260  12
  -1  11   6 266.677 156.458  29
   1  11  -6 307.298 185.666  27
  -1  11   6 425.723 222.833  18
   1  11  -6 565.839 235.551   6
   1  11  -6 457.704 201.706  15
   1  11  -6 536.903 226.855  18
  -1 -11   6 249.221 188.440   3
  -1 -11   6 43.4956 186.305  21
   1 -11  -5 4494.80 562.118  12
  -1  11   5 5030.72 619.610  18
  -1  11   5 5419.96 566.803  25
  -1  11   5 4940.33 559.364  29
   1 -11  -5 5055.43 543.167  24
   1  11  -5 4858.87 605.249   6
   1 -11  -5 5477.12 545.586   3
   1  11  -5 5002.14 624.891  27
  -1 -11   5 4388.70 530.087  21
   1 -11  -5 3286.80 448.979   8
   1 -11  -5 5699.85 611.166  28
  -1 -11   5 5411.30 608.318   3
  -1  11   5 5943.25 658.679   6
   1  11  -5 4281.02 527.006  15
   1  11  -5 4853.58 535.058  18
  -1 -11   5 5304.53 657.462  16
  -1 -11   4 5586.83 617.919   3
   1 -11  -4 5958.24 577.645  24
   1  11  -4 4823.86 603.734   6
  -1 -11   4 6088.32 695.161  16
  -1  11   4 5791.31 653.464  18
  -1 -11   4 3996.90 519.553   8
   1  11  -4 6047.62 657.343  29
   1  11  -4 5687.74 592.767  15
   1  11  -4 4730.33 532.457  18
   1 -11  -4 5067.59 549.427   8
  -1  11   4 5549.48 558.283  25
   1 -11  -4 5474.34 598.496  28
  -1 -11   4 5472.90 583.037  21
  -1  11   4 5921.97 619.186  29
   1 -11  -4 6247.17 646.252  12
  -1  11   4 5514.30 634.367   6
   1 -11  -4 6257.65 597.200   3
   1 -11  -3 5530.24 535.028  21
  -1  11   3 5557.39 600.030  29
  -1 -11   3 5853.89 678.114  16
   1 -11  -3 6012.17 629.199  28
  -1  11   3 6119.18 574.620  25
   1  11  -3 5862.90 604.107  18
  -1  11   3 6245.90 676.518   6
   1  11  -3 6073.20 650.901  29
  -1 -11   3 5905.45 568.625  12
  -1  11   3 6100.70 658.802  18
   1 -11  -3 4931.55 537.060   8
   1 -11  -3 5821.55 614.453  12
   1  11  -3 4470.93 576.240   6
  -1 -11   3 5415.48 603.154   3
  -1 -11   3 4839.43 565.344   8
  -1 -11   3 4891.73 542.036  21
   1 -11  -3 4725.83 510.146  24
  -1 -11   3 5415.70 597.614  28
   1 -11  -3 5910.88 589.248   3
   1 -11  -2 1480.11 292.350  21
   1 -11  -2 1249.68 295.498  28
   1 -11  -2 1603.37 345.486  12
   1  11  -2 1321.16 305.802  18
  -1  11   2 1580.37 356.826   6
   1  11  -2 1535.39 378.455   6
  -1  11   2 1720.33 355.583  29
  -1 -11   2 1115.55 277.017  21
  -1 -11   2 1326.85 318.899   8
   1 -11  -2 1206.89 285.343   8
  -1 -11   2 1571.22 338.061   3
   1 -11  -2 1525.24 316.186   3
  -1  11   2 1947.91 389.515  18
   1  11  -2 1694.30 352.477  29
   1 -11  -2 1695.03 308.431  24
  -1 -11   2 1445.88 323.499  28
  -1 -11   2 929.244 265.265  12
  -1 -11   2 1528.51 290.808  24
   1 -11  -1 4889.98 513.936  24
  -1 -11   1 5589.86 526.042  24
  -1  11   1 4281.13 548.517  18
   1 -11  -1 5832.93 557.821  21
   1 -11  -1 5353.98 583.371  12
   1 -11  -1 4394.59 496.314   8
  -1 -11   1 4921.13 551.663   8
  -1 -11   1 5450.75 584.950  28
  -1 -11   1 5626.03 566.254  21
   1 -11  -1 5729.15 596.933   3
  -1  11   1 5277.59 606.062   6
   1  11  -1 4980.25 599.205   6
  -1 -11   1 5037.22 568.502   3
   1  11  -1 5183.62 592.047  29
   1 -11  -1 5527.09 604.661  28
   1  11  -1 5575.26 602.517  18
  -1 -11   1 5043.31 549.769  12
  -1  11   1 5501.29 613.820  29
   1 -11   0 174.082 159.687  24
   1 -11   0-325.011 226.045   8
   1  11   0-144.087 147.628  29
   1  11   0 52.8315 153.430  25
   1 -11   0 267.983 201.001   3
  -1 -11   0-124.933 191.510  28
  -1  11   0-28.0210 162.088  18
   1 -11   0 9.12641 148.832  21
  -1 -11   0-66.7469 142.011  21
   1  11   0-33.4450 211.762   6
   1 -11   0-10.2903 158.407  12
  -1 -11   0 15.2930 173.453   8
  -1 -11   0-73.7499 155.286  24
  -1 -11   0 135.165 171.683   3
   1 -11   0 189.128 135.255  28
  -1  11   0 66.0075 164.214   6
   1  11   0-144.379 215.584  18
  -1  11   0-74.6594 181.928  29
  -1 -11   0-11.1565 149.060  12
  -1 -11  -1 3464.13 418.222  24
  -1 -11  -1 3317.46 432.129  21
  -1  11  -1 3786.83 515.801  29
   1 -11   1 3182.16 438.011   8
   1 -11   1 3710.20 467.371  12
  -1 -11  -1 3183.67 452.072  12
  -1 -11  -1 3546.93 464.335  28
   1  11   1 4638.79 551.929  29
  -1 -11  -1 2688.68 411.669   8
  -1 -11  -1 4403.35 511.198   3
  -1  11  -1 3770.92 492.207  18
   1  11   1 3253.56 426.977  25
   1 -11   1 4122.71 535.590  28
   1 -11   1 3669.74 493.971   3
   1  11   1 3251.80 484.362  18
  -1  11  -1 3140.71 482.516   6
   1 -11   1 3180.69 436.108  21
   1  11   1 3932.42 531.993   6
  -1  11  -1 3316.64 439.987  15
  -1 -11  -2 186.490 176.178   8
  -1 -11  -2 984.085 248.029  21
   1 -11   2 975.271 276.053   8
   1 -11   2 787.445 280.597  28
   1 -11   2 600.752 225.002  12
  -1  11  -2 813.743 277.307   6
   1  11   2 797.943 249.750  29
  -1 -11  -2 704.164 207.820  24
   1  11   2 493.162 233.823  18
  -1 -11  -2 605.927 232.667   3
  -1  11  -2 520.360 209.472  15
  -1 -11  -2 635.554 230.202  12
  -1 -11  -2 411.955 209.612  28
   1 -11   2 991.425 290.301   3
  -1  11  -2 391.907 208.848  18
   1 -11   2 989.325 271.516  21
   1  11   2 507.908 204.698   6
   1  11   2 1138.02 271.218  25
  -1 -11  -3 8717.09 682.909  24
   1  11   3 9448.77 746.873  25
   1  11   3 8836.13 795.337  18
   1 -11   3 9215.30 783.905   3
   1  11   3 9002.58 771.380  29
   1  11   3 8444.67 785.962   6
   1 -11   3 8768.53 712.404  12
  -1 -11  -3 9983.21 752.729   3
   1 -11   3 8350.09 715.119  21
  -1 -11  -3 8552.68 754.614  12
  -1 -11  -3 8231.94 711.641   8
  -1  11  -3 7664.01 681.901  15
   1 -11   3 7596.69 686.038   8
  -1 -11  -3 10404.0 794.714  28
  -1 -11  -3 9304.68 705.016  21
  -1  11  -3 9186.38 805.502   6
  -1  11  -3 10005.3 785.302  18
   1 -11   4 2655.01 465.616  16
   1  11   4 2057.65 382.334  29
  -1 -11  -4 2569.81 383.270  24
  -1  11  -4 1374.76 309.357  15
   1 -11   4 2601.66 401.377  12
  -1 -11  -4 2299.30 385.998  28
   1  11   4 2153.03 409.708   6
  -1 -11  -4 1882.97 327.778  21
  -1 -11  -4 1472.43 338.002  12
   1 -11   4 1382.78 320.468  21
   1 -11   4 1546.33 350.800   3
  -1 -11  -4 1553.91 346.565   8
   1  11   4 1936.87 407.996  18
   1  11   4 2073.76 365.241  25
  -1  11  -4 2016.42 408.433   6
  -1  11  -4 2159.76 379.991  18
  -1  11  -5 3417.27 469.172  18
   1 -11   5 3633.97 541.380  16
   1 -11   5 3232.49 461.033  21
   1  11   5 3093.75 464.952  25
  -1 -11  -5 3440.62 439.719  24
  -1 -11  -5 2364.55 433.525  12
  -1 -11  -5 2356.46 399.472   8
  -1  11  -5 3592.54 519.552   6
  -1  11  -5 3088.41 449.502  15
   1 -11   5 2961.62 470.798   3
   1  11   5 3349.24 503.683  18
   1  11   5 3173.19 458.312  29
  -1  11  -5 3047.22 499.811  27
   1  11   5 3321.61 513.452   6
   1 -11   6 575.060 246.470  21
  -1  11  -6 761.258 309.331  27
  -1 -11  -6 122.415 175.981  12
   1  11   6 960.428 317.150   6
  -1 -11  -6 413.483 221.996   8
   1 -11   6 1167.81 309.620   3
  -1  11  -6 534.848 223.694  15
   1  11   6 852.538 324.034  18
  -1  11  -6 789.605 286.628   6
   1 -11   6 863.731 259.533  10
  -1  11  -6 1194.20 313.488  18
   1 -11   6 884.646 311.461  16
  -1 -11  -6 497.578 211.805  24
   1  11   6 651.311 246.379  25
   1  11   6 1309.82 298.616  29
  -1 -11  -7 238.487 172.757   8
   1  11   7 124.536 135.527  29
   1 -11   7 129.213 132.810  10
   1 -11   7 85.2125 194.471  16
   1 -11   7 620.381 277.825  21
  -1  11  -7-205.891 261.841  27
  -1  11  -7 177.960 189.300   6
   1  11   7 122.931 219.753  18
  -1 -11  -7 360.406 245.089  24
  -1  11  -7 370.745 195.801  15
  -1 -11  -7 248.193 197.662  12
   1 -11   7 154.695 157.509   3
   1  11   7 295.419 245.168   6
   1  11   7 97.0483 190.355  25
  -1 -11  -8 1695.85 339.218  24
  -1  11  -8 1151.85 326.623  27
   1 -11   8 1010.86 297.341   3
   1 -11   8 1856.41 395.777  21
  -1 -11  -8 1559.08 339.309   8
  -1  11  -8 1261.43 353.835   6
   1 -11   8 869.785 272.566  10
   1  11   8 1317.92 352.013  18
  -1  11  -8 1067.25 301.083  15
   1  11   8 1361.93 356.677   6
   1 -11   8 1301.41 341.571  16
   1  11   8 1491.65 352.283  25
  -1 -11  -8 1184.58 357.795  12
   1 -11   9 7770.23 777.122   3
  -1 -11  -9 7206.85 771.858  12
   1  11   9 8387.41 813.389   6
   1  11   9 7306.54 784.440  18
  -1 -11  -9 5264.18 614.880   8
  -1  11  -9 7293.26 787.536  27
  -1  11  -9 5660.14 647.033  15
  -1 -11  -9 7459.16 695.712  24
   1 -11   9 6844.77 758.121  16
   1  11   9 6307.70 706.119  25
   1 -11   9 8228.20 776.105  21
   1 -11   9 6223.57 684.703  10
   1 -11  10 4518.90 617.227  16
  -1  11 -10 5277.24 692.453  27
   1  11  10 4920.25 647.518   6
  -1 -11 -10 3817.12 512.320  24
   1 -11  10 4821.40 620.785  10
  -1 -11 -10 4945.80 648.145  12
   1  11  10 5172.58 683.702  18
   1  11  10 4650.05 618.991  25
  -1  11 -10 4965.16 614.696  15
   1 -11  10 3912.98 570.980  21
  -1 -11 -10 4285.37 558.863   8
   1 -11  10 5038.66 645.292   3
   1  11  11 1502.76 391.624  18
  -1  11 -11 1352.91 346.750  15
  -1 -11 -11 1317.40 327.901  24
   1 -11  11 1503.10 371.327   3
  -1 -11 -11 1400.41 343.504   8
   1 -11  11 1793.90 398.088  10
   1  11  11 1385.00 364.446   6
  -1 -11 -11 1955.46 423.429  12
   1 -11  11 1584.00 385.301  21
  -1  11 -11 1309.57 383.089  27
   1 -11  11 949.199 321.040  16
   1  11  11 1145.57 346.030  25
   1  11  12 1588.28 409.684   6
   1 -11  12 1796.89 424.467   3
  -1  11 -12 1096.79 346.028  27
   1 -11  12 1134.49 329.276  21
   1 -11  12 1490.48 383.692  16
   1  11  12 904.155 304.668  18
   1  11  12 1387.78 371.139  25
  -1 -11 -12 1343.11 356.542   8
  -1  11 -12 932.445 298.590  15
   1 -11  12 763.307 273.659  10
  -1 -11 -12 1012.21 298.711  24
  -1 -11 -12 1343.89 389.860  12
   1 -11  13 95.8667 225.655  21
  -1  11 -13 394.610 248.874  15
   1  11  13 175.363 167.247  18
   1  11  13 213.466 222.647   6
  -1 -11 -13 277.664 237.988   8
  -1 -11 -13 314.155 227.669  12
  -1  11 -13-297.421 241.860  27
   1 -11  13 248.237 226.872  16
   1 -11  13 160.068 244.245   3
   1  11  13 488.659 304.229  25
  -1 -11 -13-164.693 187.968  24
   1 -11  13-71.8371 226.068  10
   1 -11  14 146.253 230.645  10
   1 -11  14 235.746 197.891   3
  -1 -11 -14 121.640 181.919  24
  -1 -11 -14 170.352 165.068   8
   1  11  14 9.26665 204.097   6
   1 -11  14 263.388 203.783  16
  -1  11 -14 523.543 304.413  27
  -1  13   9 528.622 279.038  25
   1 -13  -8 816.268 302.057  12
   1  13  -8 1057.67 355.290   6
   1  13  -8 1039.94 316.009  15
   1 -13  -8 736.048 262.983   8
  -1 -13   8 462.193 265.169  21
  -1 -13   8 1023.20 335.962   8
  -1 -13   7 744.930 300.405   3
   1  13  -7 526.208 283.496   6
   1  13  -7 180.241 174.022  15
  -1  13   7 425.691 241.772   6
   1 -13  -7 568.293 281.696  12
  -1 -13   7 182.621 151.055  21
   1 -13  -7 256.114 189.538   8
  -1 -13   7 374.499 263.541   8
   1  13  -7 104.765 194.393  27
  -1 -13   7 727.848 300.920  28
  -1  13   7 107.520 187.151  18
  -1 -13   6 3037.90 510.853  28
  -1 -13   6 3063.89 502.265   8
  -1 -13   6 3355.44 538.554   3
   1  13  -6 2870.26 467.917  15
  -1  13   6 3460.80 568.616  18
  -1 -13   6 2516.89 453.519  21
   1 -13  -6 2633.82 462.677  12
  -1  13   6 3061.16 524.483   6
   1 -13  -6 2008.60 379.417   8
   1  13  -6 3035.35 529.544  27
   1  13  -6 4168.05 611.278   6
   1 -13  -5 321.985 242.091  12
  -1 -13   5 360.645 205.721  21
  -1 -13   5 830.963 288.600   3
  -1  13   5 558.746 285.954  18
   1  13  -5 390.862 230.149  15
  -1 -13   5 465.259 272.218  28
  -1  13   5 797.372 314.332   6
   1 -13  -5 369.853 220.504   8
   1  13  -5 426.643 242.613   6
  -1 -13   5 416.246 240.781   8
   1  13  -5 595.844 319.005  27
   1  13  -4 4504.06 624.345   6
  -1 -13   4 4432.17 589.063   3
  -1 -13   4 3753.19 531.577  28
   1  13  -4 4244.23 614.061  27
  -1 -13   4 2818.37 468.615   8
  -1  13   4 3620.48 561.654   6
   1  13  -4 4114.24 541.959  18
   1 -13  -4 3394.69 486.460   8
  -1  13   4 4193.13 594.735  18
  -1 -13   4 3513.03 509.729  21
   1  13  -4 3284.38 490.822  15
   1 -13  -4 3279.22 521.437  12
  -1  13   3 900.139 318.956   6
  -1 -13   3 146.417 145.990   3
   1  13  -3 80.5059 159.885  18
   1 -13  -3 41.9894 188.639  12
  -1  13   3 56.6376 176.490  18
   1  13  -3 273.227 204.370   9
   1 -13  -3 135.447 141.498   8
   1 -13  -3-21.7884 161.619   3
   1  13  -3 305.608 212.222   6
   1  13  -3 34.5449 157.729  15
  -1 -13   3-25.8213 178.359  21
   1  13  -3 444.560 242.122  27
  -1 -13   3 36.7203 190.128   8
   1  13  -2 1716.99 396.970  27
   1  13  -2 994.705 281.366  15
   1 -13  -2 1153.67 323.757  12
  -1 -13   2 1242.74 325.776   3
   1  13  -2 1061.01 315.971  18
  -1  13   2 1144.79 354.589  18
   1 -13  -2 1399.56 334.924   8
  -1 -13   2 1225.33 313.110   8
   1  13  -2 1257.14 365.566   6
  -1  13   2 1086.40 357.571   6
   1 -13  -2 1296.26 317.775   3
  -1 -13   2 1626.10 342.915  21
  -1  13   1 341.775 229.142  18
  -1 -13   1 122.918 165.618  21
   1  13  -1 373.542 185.581  18
  -1 -13   1 302.609 204.023   3
  -1  13   1 664.212 285.410   6
   1 -13  -1 259.962 170.279   3
  -1 -13   1 98.3589 177.320   8
   1  13  -1 325.782 201.333   6
   1  13  -1 745.010 267.000  15
   1 -13  -1 226.960 188.906   8
   1 -13  -1 878.167 292.834  28
   1  13   0-220.047 204.173  29
  -1  13   0-98.0280 199.647  18
  -1 -13   0 221.415 188.553  21
  -1 -13   0-185.891 216.921   8
   1 -13   0-251.980 216.136   8
   1 -13   0-17.2449 153.946  21
  -1  13   0 76.7711 220.288   6
   1 -13   0 81.2348 156.060   3
  -1 -13   0-45.6397 133.826   3
   1  13   0-165.703 226.984  18
   1  13   0-87.6404 201.308   6
   1 -13   0-411.347 205.872  28
   1 -13   1 190.094 193.439   8
   1 -13   1 435.330 224.597  28
  -1 -13  -1 358.130 203.010   3
  -1  13  -1 39.9027 179.176   6
   1 -13   1 55.4853 138.864   3
   1  13   1 276.895 239.149  18
   1  13   1 139.004 139.693  29
  -1  13  -1 230.815 198.443  18
  -1 -13  -1 225.747 183.855   8
   1  13   1 308.402 226.671   6
   1 -13   1-50.4700 154.841  21
  -1  13  -2 10152.1 917.323   6
   1 -13   2 9987.81 874.933   3
   1  13   2 10332.7 918.929  18
   1  13   2 11074.7 967.499   6
   1 -13   2 9054.63 780.357  21
   1 -13   2 11235.7 937.139  28
   1  13   2 9429.84 856.809  29
  -1  13  -2 8694.94 802.337  18
   1 -13   2 7552.72 718.243   8
  -1 -13  -2 8262.52 757.285   8
   1 -13   3 150.483 178.222   8
   1  13   3 1031.08 355.724  18
  -1  13  -3 376.350 247.039  15
  -1 -13  -3 860.637 317.674   8
  -1  13  -3 647.470 254.982  18
   1 -13   3 53.0320 159.792  28
   1  13   3 397.555 252.676  29
   1  13   3 456.411 240.325   6
  -1  13  -3 644.820 314.102  27
  -1 -13  -3 317.853 219.825  12
  -1  13  -3 207.867 167.703   6
   1 -13   3 662.555 258.166  21
   1 -13   3 333.363 226.071   3
  -1  13  -4 6401.67 732.854   6
  -1  13  -4 7514.70 815.885  27
  -1 -13  -4 4498.08 593.232  12
   1  13   4 5588.17 703.776   6
   1  13   4 5408.22 687.523  18
   1 -13   4 4367.50 569.084   8
  -1 -13  -4 5201.15 609.842   8
   1 -13   4 5584.18 675.197   3
  -1  13  -4 5554.85 632.229  18
  -1  13  -4 4561.15 571.070  15
   1 -13   4 4567.95 622.460  28
   1 -13   4 5166.41 605.765  21
   1  13   4 5400.44 639.141  29
  -1 -13  -5 487.255 203.846   8
   1  13   5 1357.17 340.220  29
  -1  13  -5 864.492 282.247  15
   1  13   5 839.358 340.807   6
   1  13   5 832.930 294.507  25
  -1  13  -5 1292.63 352.726   6
   1 -13   5 566.155 255.228   8
  -1 -13  -5 1363.20 357.749  12
   1 -13   5 1515.71 387.852  28
   1 -13   5 1055.03 315.390   3
   1 -13   5 1645.37 358.875  21
   1  13   5 1165.36 346.278  18
  -1  13  -5 524.029 225.607  27
   1  13   6 109.501 216.192   6
  -1  13  -6 295.677 205.786   6
   1  13   6 172.057 204.145  18
   1  13   6 132.998 171.230  25
  -1 -13  -6 183.924 168.468   8
  -1  13  -6 271.660 260.759  27
   1 -13   6-109.170 203.424   3
  -1  13  -6-101.516 207.838  15
   1 -13   6-201.433 214.560  21
   1 -13   6 306.662 234.909  28
  -1 -13  -6 197.399 177.350  12
  -1 -13  -7 166.223 186.872  12
  -1  13  -7 912.857 301.731  15
   1  13   7-331.369 212.405  25
  -1  13  -7 400.815 281.509   6
   1 -13   7 680.917 279.179  21
  -1 -13  -7-64.9716 169.593   8
  -1 -13  -8 1547.45 388.054  12
  -1  13  -8 1490.04 343.834  15
   1  13   8 1733.12 387.170  25
  -1 -13  -8 878.238 292.661   8
  -2   0  25 362.326 274.810  14
  -2   0  25-127.362 203.193   1
   2   0 -25-184.070 228.844   4
   2   0 -25 224.955 239.533  17
  -2   0  24 45.0075 173.030   1
  -2   0  24 110.321 204.572  14
   2   0 -24-189.840 238.058  17
   2   0 -24-351.637 254.739   4
  -2   0  23 379.818 270.730  14
  -2   0  23 622.445 220.327  22
  -2   0  23-35.3750 167.182   1
  -2   0  23 115.255 133.997  16
   2   0 -23 193.013 220.093  17
   2   0 -23 343.776 186.026  15
   2   0 -23-131.249 267.727   4
  -2   0  22 12243.2 841.597  16
  -2   0  22 11240.0 865.862   1
  -2   0  22 10272.1 927.714  14
   2   0 -22 11178.3 981.222   4
   2   0 -22 10857.4 801.059  15
   2   0 -22 11998.9 1046.54  17
  -2   0  22 12242.4 827.582  22
  -2   0  21 344.600 173.537  22
  -2   0  21 331.233 218.302   1
  -2   0  21-3.11752 120.388  16
   2   0 -21 612.014 294.138  17
   2   0 -21-45.1098 213.608   4
  -2   0  21 69.7663 186.134  14
   2   0 -21 125.984 125.619  15
  -2   0  20 11457.2 752.150  22
   2   0 -20 10627.3 888.560   4
  -2   0  20 9734.17 847.628  14
   2   0 -20 12340.7 980.258  17
   2   0 -20 9809.30 711.541  15
  -2   0  20 10739.3 801.133   1
  -2   0  20 11706.4 767.999  16
  -2   0  19-166.464 182.251   1
  -2   0  19 41.8499 94.9175  19
  -2   0  19-63.6537 201.235  14
   2   0 -19-80.1364 223.029  17
  -2   0  19 110.285 119.423  22
   2   0 -19-35.4338 182.939   4
  -2   0  19 182.164 157.350  16
   2   0 -19 13.8436 135.774  15
  -2   0  18 445.673 170.079   1
  -2   0  18 598.192 177.459  16
  -2   0  18 935.249 274.685  14
   2   0 -18 460.941 143.910  27
  -2   0  18 585.554 180.290  19
   2   0 -18 572.025 176.632  15
   2   0 -18 671.863 216.800   4
   2   0 -18 645.180 251.968  17
  -2   0  18 373.769 146.628  22
  -2   0  17-186.279 191.477  14
  -2   0  17-56.8020 142.966   1
  -2   0  17 51.4492 101.008  22
  -2   0  17-81.0585 123.622  16
   2   0 -17-103.322 115.315  27
   2   0 -17-168.310 146.988  15
   2   0 -17-70.4654 113.205  12
   2   0 -17-59.5022 183.460  17
   2   0 -17 92.2617 197.638   4
  -2   0  17 144.371 100.728  21
  -2   0  17-91.5563 94.2040  23
   2   0 -16 11868.2 618.986  27
  -2   0  16 11025.7 703.433   1
   2   0 -16 10612.9 616.956  24
  -2   0  16 10611.9 635.035  22
   2   0 -16 11318.2 801.699  17
   2   0 -16 10429.4 603.740  12
   2   0 -16 10375.2 618.837  15
  -2   0  16 10468.0 748.977  14
  -2   0  16 11075.3 601.971  21
  -2   0  16 10391.0 555.348  23
   2   0 -16 10645.2 766.172   4
  -2   0  15 206.298 88.7751  18
   2   0 -15 166.861 112.800  12
  -2   0  15 72.8695 187.730  14
  -2   0  15 93.0420 114.904   1
   2   0 -15 157.011 181.804   4
   2   0 -15 200.751 157.501  24
  -2   0  15 157.379 123.562  22
  -2   0  15 657.358 152.286  23
   2   0 -15 231.338 173.116  17
   2   0 -15 254.308 141.306  27
   2   0 -15 255.727 138.366  15
  -2   0  15 58.7805 94.5804  21
  -2   0  14 97893.2 2579.41  14
  -2   0  14 112082. 2162.72  18
  -2   0  14 103075. 2242.87  23
  -2   0  14 98488.1 2357.31  22
   2   0 -14 104163. 2669.65   4
  -2   0  14 99119.0 2472.72   1
   2   0 -14 101840. 2679.79  17
   2   0 -14 96217.9 2319.45  15
   2   0 -14 97300.2 2292.97  12
   2   0 -14 105987. 2307.26  27
  -2   0  14 97969.4 2251.25  21
   2   0 -14 103271. 2338.16  24
   2   0 -13 415.633 143.115  24
  -2   0  13 24.9535 112.797   1
  -2   0  13 98.2137 91.1067  22
   2   0 -13-142.682 137.530   4
   2   0 -13 251.276 109.802  12
  -2   0  13 45.3487 65.3868  21
   2   0 -13 5.68080 82.6790  27
  -2   0  13 123.308 51.8556   3
  -2   0  13-71.0055 163.918  14
   2   0 -13 49.0607 100.826  15
   2   0 -13-24.0966 128.569  17
  -2   0  13 173.924 89.1622  23
   2   0 -12 48477.9 1280.31  27
  -2   0  12 47069.2 1325.84  22
  -2   0  12 49879.0 1508.48  14
   2   0 -12 50629.8 1566.64  17
  -2   0  12 50416.1 1055.85   3
   2   0 -12 50628.4 1321.44  24
  -2   0  12 50128.0 1262.77  21
  -2   0  12 49399.4 1258.37  23
   2   0 -12 47055.9 1285.57  12
   2   0 -12 49788.0 1537.56   4
   2   0 -12 48301.1 1305.94  15
  -2   0  12 50172.2 1439.29   1
   2   0 -11 8.36810 62.0562  27
   2   0 -11-62.1325 91.1206  15
  -2   0  11 177.294 67.0640  21
   2   0 -11-17.7623 100.161   4
   2   0 -11 234.102 67.9674  11
   2   0 -11 203.563 92.1133  24
   2   0 -11 305.418 128.396  17
  -2   0  11-129.783 120.249  14
  -2   0  11-34.5910 92.7083   1
   2   0 -11 19.8536 72.0212  12
  -2   0  11 20.4426 53.9373  23
  -2   0  11 87.9300 42.1622   3
  -2   0  11 79.6396 79.5250  22
  -2   0  10 1946.03 236.994  14
  -2   0  10 1947.44 177.012  21
  -2   0  10 1755.35 213.250   1
   2   0 -10 1875.00 243.152   4
   2   0 -10 1832.17 187.008  15
   2   0 -10 2324.73 207.152  24
   2   0 -10 2162.50 256.868  17
   2   0 -10 2108.95 194.538  12
  -2   0  10 2006.89 205.710  22
   2   0 -10 1753.94 180.131  27
  -2   0  10 1790.52 130.187   3
   2   0 -10 1897.30 160.949  11
  -2   0  10 1543.83 162.441  23
   2   0  -9 95.0992 93.4567  20
   2   0  -9-23.0361 49.4959  15
   2   0  -9 115.923 66.5920  24
  -2   0   9 223.265 68.3963  21
   2   0  -9 147.513 71.9186  27
  -2   0   9 48.9920 63.4774  22
   2   0  -9 15.0580 75.9826   4
   2   0  -9 31.3653 53.4450  12
   2   0  -9 31.1647 37.1908  11
  -2   0   9 31.5722 33.3669   3
  -2   0   9 54.5167 54.0055  23
   2   0  -9-15.5480 82.0077  17
  -2   0   9 67.3633 72.4843  14
  -2   0   9-24.4673 73.3695   1
   2   0  -8 272872. 4750.79  15
  -2   0   8 255918. 4846.07   1
   2   0  -8 273828. 4732.46  12
   2   0  -8 273738. 4755.06  27
   2   0  -8 277937. 4884.19  20
   2   0  -8 266309. 4626.20  11
  -2   0   8 269799. 4795.21  22
   2   0  -8 266484. 4962.03  17
   2   0  -8 264043. 4962.80   4
  -2   0   8 269320. 4927.57  14
  -2   0   8 271191. 4580.79   3
   2   0  -8 272843. 4743.20  24
  -2   0   8 266606. 4680.30  21
  -2   0   8 274176. 4727.28  23
   2   0  -7 13.6069 37.2052  12
   2   0  -7 509.816 70.9357  11
   2   0  -7 43.5418 47.3990  24
   2   0  -7 138.590 65.1632  27
  -2   0   7 147.224 40.4423   3
  -2   0   7 468.290 92.3190  22
  -2   0   7 230.066 58.6970  21
   2   0  -7 680.229 91.4075  15
  -2   0   7 60.6992 54.5611   1
  -2   0   7 245.731 68.5691  23
  -2   0   7 36.5506 65.2762  14
   2   0  -7 80.2214 66.3779  17
  -2   0   6 80844.2 1557.50  21
   2   0  -6 84633.6 1589.54  12
  -2   0   6 82606.5 1681.66   1
   2   0  -6 82350.2 1754.15   4
   2   0  -6 81776.2 1747.62  17
   2   0  -6 83293.2 1622.78  27
   2   0  -6 81918.3 1594.52  24
  -2   0   6 83060.2 1601.93  23
  -2   0   6 79234.5 1635.20  22
  -2   0   6 86352.7 1517.72   3
   2   0  -6 85124.2 1598.46  15
  -2   0   6 81966.8 1722.35  14
   2   0  -5 30.9743 33.9075  24
   2   0  -5 33.9966 28.8029  12
   2   0  -5 81.9832 35.9896  15
  -2   0   5 70.9937 38.1465  22
   2   0  -5 35.4984 44.2774   4
   2   0  -5 18.9721 33.4325  27
  -2   0   5 68.0572 31.4999  21
  -2   0   5 105.926 26.1569  18
   2   0  -5 4.64908 49.4599  17
  -2   0   5 28.4545 40.7004   1
  -2   0   5 87.5086 27.4320   3
   2   0  -5 177.166 37.2569   9
  -2   0   5 50.2501 40.2713  14
  -2   0   5 29.6846 27.4585  23
   2   0  -4 200008. 3467.24  27
  -2   0   4 207046. 3402.03   3
   2   0  -4 222111. 3430.62  15
   2   0  -4 198750. 3552.52   4
   2   0  -4 219731. 3420.21  12
  -2   0   4 202650. 3350.36  18
   2   0  -4 198854. 3423.84  13
   2   0  -4 201108. 3560.72  17
  -2   0   4 203525. 3541.44  14
   2   0  -4 191359. 3462.73  26
   2   0  -4 210733. 3432.64  24
  -2   0   4 211031. 3483.18  22
   2   0  -4 210501. 3405.34   9
  -2   0   4 203427. 3400.73  21
  -2   0   4 200896. 3500.44   1
  -2   0   4 207133. 3457.53  23
  -2   0   3 141.772 29.8168   3
   2   0  -3 332.526 41.3539  24
   2   0  -3 148.163 28.5861   9
   2   0  -3 227.618 55.8674   4
   2   0  -3 156.042 25.8736  12
  -2   0   3 336.736 44.2184  23
   2   0  -3 237.844 32.1705  15
  -2   0   3 232.687 45.6532   1
   2   0  -3 182.492 40.8487  26
  -2   0   3 198.984 32.2113  21
  -2   0   3 144.526 37.5575  22
  -2   0   3 318.813 61.5178  14
   2   0  -3 191.130 42.1921  27
   2   0  -3 203.727 57.4882  17
   2   0  -2 86385.4 543.454  26
  -2   0   2 88020.2 618.081   1
   2   0  -2 89271.6 465.599  24
   2   0  -2 88043.5 546.291   9
   2   0  -2 88373.9 571.555  25
  -2   0   2 86541.1 548.071   3
   2   0  -2 87265.9 572.984  27
  -2   0   1 153.461 20.7547  19
   2   0  -1 7.02996 10.5187  10
   2   0  -1 293.439 30.9439   9
  -2   0   1-0.58891 8.08571  23
   2   0  -1 133.620 19.0977  27
  -2   0   1 98.6159 20.4304  20
  -2   0   1 12.5691 11.5354  22
   2   0  -1 288.157 32.4245  26
   2   0  -1 271.324 28.3067  25
  -2   0   1 341.948 38.8541   1
  -2   0   1-0.28911 6.82734  11
   2   0   0 198913. 1246.16  25
  -2   0   0 213759. 1408.59   2
  -2   0   0 223294. 1352.35  20
  -2   0   0 202055. 1187.96   8
   2   0   0 218173. 1321.02   7
  -2   0   0 168610. 1237.04  22
   2   0   0 228722. 1322.21  26
  -2   0   0 223523. 1280.81  15
  -2   0   0 167155. 1178.65  23
   2   0   0 220005. 1238.80   9
   2   0   1 37.9806 17.6398   9
  -2   0  -1 106.764 29.6154   8
  -2   0  -1 671.075 67.6090  20
  -2   0  -1 229.163 46.8943   2
  -2   0  -1 199.137 35.5226  11
  -2   0  -1 887.214 70.6572  15
  -2   0  -1 1205.05 82.9615  12
  -2   0  -1 93.9694 40.4704  17
  -2   0  -2 84768.6 1603.05  20
  -2   0  -2 87618.1 1462.74  27
  -2   0  -2 83307.2 1551.91  24
  -2   0  -2 82479.9 1556.82  11
  -2   0  -2 81231.2 1641.75  17
  -2   0  -2 85028.8 1633.23   2
  -2   0  -2 84839.2 1579.30  15
  -2   0  -2 82327.2 1579.79  12
  -2   0  -2 83842.1 1633.19   4
   2   0   2 88440.8 1479.28   9
  -2   0  -2 86245.3 1559.53   8
  -2   0  -3 126.921 43.4275   8
   2   0   3 132.929 26.1784   9
  -2   0  -3 97.0493 28.1406  27
  -2   0  -3 71.0220 36.7251  11
  -2   0  -3 70.6513 39.6755  12
  -2   0  -3 176.909 51.9778  15
  -2   0  -3 90.7406 50.8776  17
   2   0   3 148.806 32.6402   3
  -2   0  -3 112.066 45.8670  20
  -2   0  -3 125.894 59.2860   2
  -2   0  -3 113.628 59.2549   4
  -2   0  -4 149492. 2835.15   2
  -2   0  -4 146574. 2712.35  11
  -2   0  -4 150713. 2771.93  12
  -2   0  -4 146232. 2866.15  17
   2   0   4 162635. 2579.53   9
  -2   0  -4 149703. 2736.01  24
  -2   0  -4 150573. 2760.37  15
  -2   0  -4 149380. 2803.08  20
  -2   0  -4 145420. 2848.52   4
  -2   0  -4 151554. 2745.86   8
   2   0   4 159825. 2634.91   3
  -2   0  -4 154364. 2619.95  27
  -2   0  -5 319.660 86.9198  20
  -2   0  -5 250.486 72.4434  15
  -2   0  -5 82.1547 56.0806   8
  -2   0  -5 16.8985 75.2960   2
  -2   0  -5 140.311 83.1877   4
   2   0   5 56.2670 25.7489   3
   2   0   5 99.0784 35.1299   9
  -2   0  -5 95.9749 59.0341  24
  -2   0  -5 57.6392 35.2171  27
  -2   0  -5 126.061 51.3884  11
  -2   0  -5 63.4040 67.4882  12
  -2   0  -6 303305. 5509.58   2
  -2   0  -6 313580. 5395.11   8
   2   0   6 329125. 5123.55   9
  -2   0  -6 307032. 5228.19  27
  -2   0  -6 297450. 5563.53  17
  -2   0  -6 302929. 5477.47  20
   2   0   6 317473. 5171.18   3
  -2   0  -6 320770. 5441.84  12
  -2   0  -6 307189. 5379.40  24
  -2   0  -6 303498. 5549.25   4
  -2   0  -6 303755. 5332.40  11
  -2   0  -6 304640. 5410.54  15
  -2   0  -7 39.6629 42.4416  27
  -2   0  -7 169.471 90.9812  17
  -2   0  -7 294.073 91.9112  12
   2   0   7 169.364 40.4941   9
  -2   0  -7 45.8004 51.3874  11
   2   0   7 113.041 35.7948   3
  -2   0  -7 10.8295 76.9024  20
  -2   0  -7 408.832 106.515  15
  -2   0  -7 84.9960 78.4875   4
  -2   0  -7 0.39619 69.2245   2
  -2   0  -7 116.863 76.0451  24
  -2   0  -8 104503. 2221.97  24
  -2   0  -8 108678. 2424.36   4
   2   0   8 110490. 1903.49   9
  -2   0  -8 104865. 2361.52   2
  -2   0  -8 103322. 2256.12  12
  -2   0  -8 104888. 2430.98  17
   2   0   8 109899. 1944.88   3
  -2   0  -8 105536. 2066.47  27
  -2   0  -8 106373. 2348.19  20
  -2   0  -8 106308. 2261.98  15
  -2   0  -8 103779. 2162.04  11
  -2   0  -9-11.6005 63.3648  11
   2   0   9 44.6897 21.6947   9
  -2   0  -9-5.41012 90.8018  17
  -2   0  -9 28.3951 77.7869  12
  -2   0  -9 52.7399 93.8690  20
   2   0   9 71.7389 32.0643   3
  -2   0  -9 17.9286 81.1882   2
  -2   0  -9 123.050 63.4166  27
  -2   0  -9 18.5787 90.3880   4
  -2   0  -9-62.7917 85.3901  15
  -2   0  -9 125.273 81.8185  24
  -2   0 -10 984.379 188.252  20
  -2   0 -10 1064.73 177.053  15
   2   0  10 1069.91 92.1100   3
  -2   0 -10 874.038 164.201  12
  -2   0 -10 1202.48 141.482  27
   2   0  10 1385.66 155.511  23
  -2   0 -10 1008.46 192.852   2
  -2   0 -10 1095.11 211.528  17
  -2   0 -10 1132.20 162.319  11
  -2   0 -10 958.818 201.498   4
  -2   0 -11-23.8757 53.9736  27
  -2   0 -11-11.9084 63.3885  11
  -2   0 -11-1.18541 95.0915  12
  -2   0 -11-11.6820 105.762  15
  -2   0 -11 179.483 121.264   2
   2   0  11-19.6385 57.7838  23
  -2   0 -11-19.9182 144.557  17
  -2   0 -11 217.498 142.517   4
  -2   0 -12 98924.3 2078.93  27
  -2   0 -12 91277.4 2287.98  15
   2   0  12 93433.0 2222.32  22
  -2   0 -12 95564.6 2436.80   2
  -2   0 -12 96776.9 2455.04  20
  -2   0 -12 98695.0 2193.80  11
  -2   0 -12 92324.2 2493.66   4
  -2   0 -12 96872.1 2581.84  17
   2   0  12 101944. 2089.57  23
  -2   0 -13 108.222 70.3408  27
  -2   0 -13-96.9544 140.081   2
  -2   0 -13-164.861 188.065   4
   2   0  13 90.4162 79.8082  23
  -2   0 -13-59.8866 177.503  17
  -2   0 -13 157.098 132.205  15
   2   0  13 53.4677 83.9080  21
  -2   0 -13 39.5547 75.6877  11
   2   0  13 64.4235 93.1149  22
   2   0  13 99.4903 105.039  16
  -2   0 -13 45.2411 134.640  20
  -2   0 -14 7998.16 497.726  11
  -2   0 -14 7668.78 651.772  17
  -2   0 -14 6173.83 575.640   4
  -2   0 -14 6750.91 523.050  15
  -2   0 -14 7321.51 578.695   2
   2   0  14 6782.64 470.920  16
   2   0  14 7036.75 502.903  21
   2   0  14 6942.99 485.579  22
  -2   0 -14 6527.29 568.739  20
  -2   0 -15-102.196 175.941  17
  -2   0 -15 100.217 139.500   4
  -2   0 -15 126.898 100.408  11
  -2   0 -15 7.35712 124.993  15
  -2   0 -15 82.7257 121.888   2
   2   0  15 70.1424 82.3297  16
   2   0  15-58.0585 94.9507  22
   2   0  15 112.311 89.2603  21
  -2   0 -15 246.259 157.295  20
   2   0  16 2160.33 296.349  22
  -2   0 -16 1542.98 336.690  17
  -2   0 -16 1238.21 275.513   2
  -2   0 -16 908.371 256.478  20
   2   0  16 1575.43 259.099  16
  -2   0 -16 1117.17 296.541   4
  -2   0 -16 1338.29 263.966  15
   2   0  16 1311.27 270.981   1
   2   0  16 1651.27 272.316  21
   2   0  17-129.776 205.846  14
   2   0  17-48.4154 182.596   1
   2   0  17 14.5659 100.174  22
  -2   0 -17 376.005 213.325  15
  -2   0 -17 163.278 165.573  17
   2   0  17 152.193 139.452  16
   2   0  17 234.005 134.080  21
  -2   0 -17-52.9338 175.106   4
  -2   0 -18 5435.03 626.252   4
   2   0  18 5240.32 621.282  14
  -2   0 -18 5380.24 663.556  17
  -2   0 -18 5603.62 550.273  15
   2   0  18 6259.65 531.193  22
   2   0  18 6154.24 551.713  21
   2   0  18 4995.81 559.783   1
   2   0  19-159.235 210.496   1
   2   0  19-153.630 179.101  14
  -2   0 -19-118.789 197.218  15
  -2   0 -19-118.577 187.751   4
  -2   0 -19 537.096 294.951  17
  -2   0 -20 25954.1 1478.14   4
   2   0  20 23826.7 1427.37  14
  -2   0 -20 23950.0 1501.35  17
   2   0  20 24137.5 1322.96   1
   2   0  21-206.612 264.325  14
   2   0  21 7.69703 179.191   1
  -2   0 -21 134.158 258.887  17
  -2   0 -22 450.292 274.259  17
   2   0  22 257.125 194.578   1
   2   0  23-54.9110 167.530   1
   2   0  23-111.081 228.254  14
  -2  -2  25 1510.42 402.468   1
  -2   2  25 829.037 297.441  22
  -2   2  25 758.697 313.440  14
  -2   2  25 1044.13 321.472   5
   2   2 -25 845.596 327.108   4
   2   2 -25 708.860 256.528  15
  -2  -2  24-12.4618 191.050   1
  -2   2  24-160.173 195.554   5
   2   2 -24 132.271 169.334   4
   2  -2 -24-78.9413 205.303  17
  -2   2  24-84.8963 153.070  22
  -2   2  24-105.808 236.672  14
   2   2 -24 38.0114 170.016  15
  -2  -2  24 639.387 319.667  14
   2  -2 -24 315.381 262.107   4
   2   2 -24-119.544 233.316  17
  -2  -2  23 294.329 211.519   1
  -2  -2  23 349.587 204.018  16
   2  -2 -23 290.415 225.268  17
   2   2 -23 557.831 237.398  15
   2   2 -23 599.800 261.461   4
  -2   2  23 490.701 212.451  22
  -2   2  23 405.880 236.732  14
  -2  -2  23 260.493 261.423  14
  -2   2  23 514.752 190.760  16
   2   2 -23 305.803 216.548  17
   2  -2 -23 184.137 162.762   4
   2   2 -22 696.817 274.651  17
  -2  -2  22 954.063 298.434   1
   2  -2 -22 862.113 303.379  17
   2   2 -22 554.092 247.127   4
  -2  -2  22 1035.08 285.168  16
   2   2 -22 988.374 287.377  15
  -2  -2  22 401.621 232.248  14
   2  -2 -22 239.285 186.151   4
  -2   2  22 621.353 269.908  14
   2  -2 -22 674.547 232.785  12
  -2   2  22 952.100 279.828  22
   2  -2 -21 11303.9 806.861  12
   2   2 -21 11705.8 908.174   4
   2  -2 -21 10749.0 955.592  17
  -2  -2  21 10240.8 917.362  14
  -2  -2  21 12190.0 833.173  16
   2  -2 -21 11684.8 810.208  24
   2   2 -21 11270.9 819.530  15
   2   2 -21 12558.8 1001.37  17
  -2   2  21 11402.8 912.070  14
  -2  -2  21 11350.0 913.372   1
  -2   2  21 11039.0 769.745   1
   2  -2 -21 11315.1 983.255   4
  -2   2  21 10756.8 820.372  22
   2  -2 -20 4715.90 508.248  24
   2   2 -20 3905.13 475.139  15
  -2  -2  20 4226.44 585.371  14
   2   2 -20 5421.12 649.263  17
  -2   2  20 4435.40 451.712  23
   2  -2 -20 3982.75 574.246   4
  -2  -2  20 4466.79 488.707  16
  -2   2  20 4865.52 495.288   1
  -2  -2  20 4520.26 567.538   1
   2   2 -20 3664.41 494.323   4
  -2   2  20 4600.34 516.126  22
   2  -2 -20 4539.43 495.449  12
   2  -2 -20 4314.59 583.427  17
  -2   2  20 3879.85 520.191  14
   2  -2 -19 2642.70 453.294   4
  -2   2  19 2836.07 392.493  22
   2   2 -19 2343.98 407.891  17
  -2  -2  19 2951.24 345.805  22
   2  -2 -19 2824.46 471.854  17
   2   2 -19 2682.95 413.930   4
  -2  -2  19 2809.53 437.580   1
   2  -2 -19 2731.40 376.901  24
  -2   2  19 2009.63 360.383  14
   2   2 -19 2931.13 387.540  15
  -2   2  19 2615.85 353.299   1
  -2   2  19 3216.64 380.184  23
  -2  -2  19 3310.72 415.431  16
  -2  -2  19 2401.14 349.417  21
   2   2 -19 2904.65 360.648  27
   2  -2 -19 2802.71 385.093  12
  -2  -2  19 2645.27 443.900  14
   2  -2 -18 703.023 258.618  17
  -2  -2  18 392.843 174.038  21
  -2   2  18 266.268 142.700  14
   2  -2 -18 121.126 191.969   4
  -2   2  18 494.338 151.787  23
   2   2 -18 431.177 152.582  27
  -2  -2  18 487.361 204.164  14
   2   2 -18 454.601 185.626  15
  -2   2  18 573.331 171.155   1
  -2  -2  18 409.942 160.564  22
  -2  -2  18 512.613 175.344  16
  -2   2  18 259.250 170.803  22
   2   2 -18 448.802 184.438   4
   2  -2 -18 613.876 203.553  24
  -2  -2  18 446.427 176.168   1
   2   2 -18 244.478 221.208  17
   2  -2 -18 434.694 172.217  12
  -2   2  17 174.154 131.526  22
   2  -2 -17 912.295 273.176  17
  -2  -2  17 73.1634 161.670  14
  -2   2  17 476.552 149.673  23
   2   2 -17 435.629 189.193   4
   2  -2 -17 309.126 171.575  24
  -2  -2  17 559.873 173.562  16
   2  -2 -17 283.822 130.147  27
   2  -2 -17 405.773 214.260   4
   2   2 -17 202.123 129.157  27
  -2   2  17 522.190 201.491  14
  -2   2  17 226.227 121.562   1
   2   2 -17 541.806 203.000  17
  -2  -2  17 335.237 140.398  22
   2   2 -17 166.907 128.524  15
   2  -2 -17 557.556 182.235  12
  -2   2  17 518.100 155.327  19
  -2  -2  17 283.533 183.733   1
  -2  -2  17 262.122 120.801  21
  -2  -2  16 3355.60 328.594  22
  -2  -2  16 3296.68 362.230  16
  -2   2  16 3396.90 332.769  18
  -2   2  16 3324.78 315.838  19
  -2  -2  16 2596.02 381.156   1
   2  -2 -16 2925.43 420.811  17
  -2  -2  16 2907.61 417.766  14
  -2  -2  16 3047.40 352.670  21
   2  -2 -16 2774.08 341.457  24
  -2   2  16 3569.26 361.642   1
   2  -2 -16 3066.58 438.439   4
  -2   2  16 2847.20 369.919  14
   2   2 -16 4062.77 442.053   4
   2   2 -16 2779.10 340.974  15
   2   2 -16 2975.50 403.989  17
  -2   2  16 2860.23 362.694  22
   2   2 -16 3043.69 332.864  27
  -2   2  16 3122.00 345.433  23
   2  -2 -16 3320.84 326.874  27
   2  -2 -16 2747.30 336.517  12
   2   2 -15 30509.3 1236.31   4
  -2   2  15 32205.5 1127.19   1
  -2  -2  15 30645.6 1155.40  21
  -2  -2  15 31166.8 1315.62  14
   2  -2 -15 31585.8 1369.60   4
  -2  -2  15 30487.4 1051.56  22
  -2   2  15 34422.1 1115.20  18
  -2  -2  15 30858.0 1283.41   1
  -2   2  15 30355.0 1195.80  22
   2  -2 -15 32059.2 1061.41  27
  -2   2  15 31205.0 1245.03  14
   2  -2 -15 32084.4 1344.99  17
   2  -2 -15 29958.1 1150.56  12
   2  -2 -15 33649.0 1240.04  20
   2   2 -15 31851.5 1119.92  27
  -2  -2  15 32016.8 1163.32  16
  -2  -2  15 34035.9 964.427  23
   2  -2 -15 32100.0 1151.08  24
   2   2 -15 32738.3 1335.85  17
  -2   2  15 31807.6 1142.70  23
  -2   2  15 31397.2 1034.01  19
   2   2 -15 29001.3 1133.18  15
  -2  -2  15 31833.4 969.405   3
   2  -2 -14 12754.5 801.906   4
  -2   2  14 12046.9 706.812  14
  -2   2  14 11977.9 568.608  19
  -2   2  14 12218.1 624.891   1
   2  -2 -14 12524.0 598.284  27
   2   2 -14 11659.2 622.822  27
   2   2 -14 11148.1 721.755  17
   2  -2 -14 11875.1 597.989  15
  -2  -2  14 13251.0 560.929   3
   2   2 -14 11246.5 638.045  15
  -2  -2  14 12234.8 746.071   1
   2  -2 -14 11687.9 649.141  12
   2  -2 -14 11930.7 639.792  24
   2   2 -14 13199.9 735.104   4
  -2   2  14 12479.1 524.756  21
  -2  -2  14 12370.3 665.793  21
  -2   2  14 11279.5 623.438  23
  -2  -2  14 12137.6 590.680  22
  -2   2  14 13846.6 637.522  18
  -2  -2  14 12498.2 659.715  16
   2  -2 -14 13563.9 712.797  20
  -2  -2  14 12828.2 524.223  23
  -2  -2  14 12865.5 777.141  14
   2  -2 -14 12879.8 783.350  17
   2  -2 -13 57796.8 1787.46  17
   2   2 -13 57062.5 1566.18  27
  -2   2  13 56378.8 1527.25   1
  -2  -2  13 59079.5 1782.47  14
   2   2 -13 57965.8 1757.72  17
   2  -2 -13 57269.9 1817.26   4
   2   2 -13 56123.5 1586.79  15
  -2   2  13 59876.0 1615.75  23
   2   2 -13 58224.8 1699.23   4
  -2   2  13 57507.7 1462.02  19
  -2   2  13 57855.5 1688.79  14
   2  -2 -13 59365.0 1498.97  27
  -2  -2  13 56358.8 1739.96   1
  -2  -2  13 60451.3 1619.86  16
   2   2 -13 58968.7 1766.49   2
  -2   2  13 61078.7 1549.05  18
   2  -2 -13 57566.9 1605.45  12
  -2  -2  13 57630.8 1612.78  21
  -2  -2  13 61003.7 1384.93  23
  -2  -2  13 59343.4 1442.00   3
  -2  -2  13 58755.7 1498.25  22
   2  -2 -13 62210.6 1665.67  20
   2  -2 -13 56917.8 1573.29  24
   2  -2 -13 56661.9 1497.84  15
  -2   2  12 7974.74 514.336  14
  -2  -2  12 7823.66 479.037  16
   2   2 -12 8228.58 475.724  27
   2  -2 -12 8231.51 566.858  17
   2  -2 -12 7907.58 431.361  27
  -2  -2  12 8161.96 419.957   3
  -2  -2  12 8011.15 546.015   1
  -2   2  12 8087.93 448.422  18
  -2  -2  12 8105.94 560.392  14
   2   2 -12 7841.82 512.196   4
   2   2 -12 7819.29 480.377  15
   2   2 -12 9090.24 580.334   2
  -2   2  12 7662.86 441.008   1
  -2   2  12 7807.13 420.914  19
   2  -2 -12 8370.69 494.062  20
   2  -2 -12 7527.67 473.738  12
  -2  -2  12 7877.16 488.714  21
   2  -2 -12 7498.37 424.692  15
   2  -2 -12 7886.49 471.310   8
  -2   2  12 8194.15 275.101  29
  -2  -2  12 8833.44 394.749  23
   2  -2 -12 8611.73 490.511  24
   2  -2 -12 8483.71 588.648   4
   2   2 -12 7836.22 539.156  17
   2   2 -12 8503.29 321.679  11
  -2  -2  12 7406.62 415.234  22
  -2  -2  11 12124.1 587.774  21
  -2  -2  11 11764.4 506.397  22
   2   2 -11 10620.0 543.586  15
  -2  -2  11 11935.6 636.556   1
   2   2 -11 11566.6 592.496   4
   2   2 -11 12248.0 376.557  11
  -2   2  11 12304.2 542.573  18
   2  -2 -11 11719.6 514.051  27
  -2  -2  11 11088.4 626.372  14
  -2   2  11 11035.5 581.707  14
  -2  -2  11 11580.6 563.986  16
  -2   2  11 11292.3 336.145  29
  -2   2  11 10960.3 507.224   1
   2   2 -11 11088.2 615.066  17
   2  -2 -11 11729.1 559.163  20
   2  -2 -11 11122.8 648.571   4
   2  -2 -11 10773.8 530.341   8
   2  -2 -11 11507.3 549.058  24
   2   2 -11 11417.2 550.184  27
  -2  -2  11 12020.4 506.317   3
  -2  -2  11 11642.3 446.994  23
   2  -2 -11 10875.7 493.806  15
   2  -2 -11 10896.0 621.801  17
   2   2 -11 12093.8 641.165   2
   2  -2 -11 11039.5 557.838  12
  -2   2  11 10842.6 484.438  19
   2  -2 -10 31.2421 53.3541  15
   2  -2 -10-23.7257 105.809   4
   2   2 -10 40.4214 75.5123  15
  -2   2  10 199.847 75.9922   1
   2  -2 -10 19.0076 54.5521  20
   2   2 -10 298.600 135.038   2
  -2   2  10 59.5348 22.2378  29
   2  -2 -10 231.942 110.114  17
   2  -2 -10 84.2912 84.4867  24
  -2  -2  10 169.762 79.3735  21
   2   2 -10-19.9066 86.6060  17
   2  -2 -10 93.8307 62.6977  27
   2   2 -10 128.283 37.8306  11
  -2   2  10 27.7459 63.4522  18
  -2  -2  10 30.6153 42.4794  23
   2   2 -10 111.576 79.4456   4
   2   2 -10 80.0100 74.3466  27
  -2  -2  10 79.8619 60.0696   3
   2  -2 -10 16.3270 71.2168  12
   2  -2 -10 24.1417 65.6352   8
  -2  -2  10 65.5649 96.7317  14
  -2  -2  10 160.526 91.1665   1
  -2  -2  10 38.5767 57.3277  22
  -2   2  10 38.4344 18.0215  13
  -2   2  10-35.4835 51.0651  19
  -2   2  10 52.4286 78.4378  14
  -2  -2  10 100.337 88.5850  16
  -2  -2   9 36658.4 1004.75   3
   2   2  -9 38218.8 1138.45  17
   2   2  -9 40148.9 763.757   9
  -2  -2   9 37201.8 1082.81  21
   2  -2  -9 39094.7 1045.25   8
   2   2  -9 38043.2 1065.46  27
   2  -2  -9 37202.0 1076.43  12
   2  -2  -9 38327.3 1192.02   4
  -2   2   9 37382.4 988.179  19
  -2   2   9 38037.6 1032.47  18
  -2  -2   9 38803.6 919.210  23
   2   2  -9 37314.6 1067.49  15
  -2  -2   9 38170.3 1072.05  16
  -2   2   9 38918.4 803.912  29
  -2  -2   9 37466.0 1151.18   1
   2   2  -9 39038.4 1171.43   2
   2  -2  -9 38206.5 1154.62  17
   2  -2  -9 38848.3 1053.30  24
  -2   2   9 38660.2 991.106   1
   2  -2  -9 38687.4 1010.33  27
  -2   2   9 37153.4 695.635  13
   2   2  -9 41054.3 800.984  11
  -2  -2   9 41030.1 1183.63  14
   2  -2  -9 40596.7 1039.02  20
  -2   2   9 40443.7 1117.32  14
  -2  -2   9 37544.3 976.938  22
   2   2  -9 40728.4 1120.16   4
  -2  -2   8 138202. 2611.92  22
  -2  -2   8 137098. 2719.45  16
   2   2  -8 137010. 2829.55   2
  -2   2   8 137208. 2424.42  29
   2  -2  -8 136771. 2862.70   4
   2  -2  -8 135563. 2738.36  12
   2  -2  -8 139402. 2679.84   8
   2   2  -8 143458. 2389.55   9
   2   2  -8 139146. 2795.98  17
   2   2  -8 146052. 2393.68  11
   2  -2  -8 142555. 2643.33  20
   2  -2  -8 136652. 2644.69  27
  -2  -2   8 133681. 2663.72   3
  -2  -2   8 138328. 2820.00  14
  -2  -2   8 136360. 2536.61  23
   2   2  -8 136710. 2731.57  15
  -2   2   8 130897. 2671.15  18
   2  -2  -8 137236. 2696.38  24
   2   2  -8 141544. 2755.07   4
   2  -2  -8 136879. 2813.83  17
  -2  -2   8 132243. 2749.16  21
  -2   2   8 132017. 2618.44  19
   2   2  -8 138119. 2729.89  27
  -2   2   8 132860. 2718.41  14
  -2   2   8 135675. 2593.65   1
   2   2  -7 158293. 3132.52   2
  -2   2   7 166412. 2915.84   1
   2  -2  -7 164605. 2935.40  20
   2   2  -7 160379. 3057.89  27
   2  -2  -7 158818. 3067.83  12
  -2  -2   7 157612. 3041.54  16
  -2  -2   7 161353. 3118.80  14
   2   2  -7 162890. 3070.60  15
  -2   2   7 161368. 2796.53  29
   2   2  -7 158887. 3088.01  17
   2   2  -7 169642. 2735.93  11
  -2   2   7 156439. 3031.45  18
   2   2  -7 157811. 2967.24  25
   2  -2  -7 161183. 2998.26   8
  -2  -2   7 157600. 3018.06   3
   2  -2  -7 155077. 3095.14  17
  -2  -2   7 156139. 3090.00  21
   2   2  -7 164856. 2768.63   9
   2   2  -7 157681. 3015.63  29
   2  -2  -7 158415. 3162.14   4
  -2  -2   7 160418. 2943.22  22
   2  -2  -7 158543. 3021.35  24
   2  -2  -7 159537. 2985.75  27
  -2   2   7 157115. 2964.16  19
  -2   2   7 159023. 3039.85  14
   2   2  -7 159588. 3045.45   4
  -2  -2   7 156529. 2879.16  23
   2   2  -6 61489.7 1132.49  18
   2  -2  -6 61819.8 1219.05  20
   2  -2  -6 58945.0 1321.94  24
   2   2  -6 61246.1 1326.93   4
   2   2  -6 63519.2 1095.53  11
  -2   2   6 58759.1 1344.44  18
   2   2  -6 59219.6 1391.11   2
   2   2  -6 59316.7 1361.12  15
  -2   2   6 61857.2 1209.58   1
  -2  -2   6 58587.1 1389.61   1
  -2   2   6 58938.1 1308.96  14
   2   2  -6 59052.5 1346.15  27
   2  -2  -6 57658.7 1351.14  17
   2   2  -6 56878.7 1345.84  29
   2  -2  -6 62605.5 1300.41   8
  -2   2   6 58183.2 1284.32  19
  -2   2   6 59581.6 1334.96   5
  -2   2   6 61725.6 1175.75  29
  -2  -2   6 60522.0 1223.79  23
  -2  -2   6 58787.1 1340.29  16
   2   2  -6 59445.1 1275.25  25
   2   2  -6 58838.7 1343.48  17
   2  -2  -6 58139.6 1359.41  12
   2   2  -6 62193.6 1151.09   9
   2  -2  -6 59916.9 1416.11   4
  -2  -2   6 59527.7 1261.50  22
  -2  -2   6 57246.1 1378.22  21
  -2  -2   6 58130.8 1368.61  14
  -2  -2   6 59470.2 1337.18   3
  -2   2   5 87444.6 1537.32   1
   2   2  -5 83377.0 1732.42  15
   2  -2  -5 81179.8 1675.23  17
   2   2  -5 84642.8 1520.21  18
  -2  -2   5 83459.8 1704.37  14
  -2   2   5 81371.2 1721.17  18
   2  -2  -5 82518.8 1680.56  24
  -2  -2   5 80527.5 1588.84  23
   2   2  -5 82709.6 1706.82  27
   2   2  -5 86568.9 1547.98   9
   2  -2  -5 81166.6 1734.32   4
  -2  -2   5 81761.3 1615.75  22
  -2  -2   5 81448.6 1696.34  16
  -2  -2   5 80316.1 1747.91  21
  -2  -2   5 82299.1 1731.48   1
  -2  -2   5 81526.1 1699.37   3
   2   2  -5 82006.4 1719.72   2
   2  -2  -5 82757.5 1731.12  12
  -2   2   5 83941.5 1563.71  29
   2   2  -5 84828.5 1650.15   4
   2  -2  -5 84087.1 1558.19  10
   2  -2  -5 88227.1 1530.31  20
   2  -2  -5 87314.9 1642.01   8
   2   2  -5 82636.6 1627.86  25
   2   2  -5 80532.3 1666.48  17
  -2   2   5 82138.0 1656.57  19
  -2   2   5 81595.9 1683.62   5
  -2   2   5 84229.1 1644.26  14
   2   2  -5 79065.9 1716.84  29
  -2   2   4 1102.21 121.879   5
   2   2  -4 1212.75 123.725   6
   2   2  -4 1321.51 117.296  25
   2   2  -4 1222.58 141.719  13
   2  -2  -4 1015.08 117.754  28
  -2  -2   4 1070.57 116.943  16
  -2   2   4 998.379 109.690  19
   2   2  -4 1142.98 97.7088   9
  -2  -2   4 1152.87 104.516  23
   2  -2  -4 1431.57 136.433   4
   2   2  -4 1258.59 111.251   4
  -2  -2   4 1472.03 133.236  14
  -2  -2   4 1339.70 114.996  22
   2   2  -4 1312.93 115.276  17
  -2  -2   4 1221.98 130.755   1
   2   2  -4 1030.92 126.625  29
  -2  -2   4 1883.24 172.326  21
  -2   2   4 1292.44 139.908  18
   2   2  -4 1109.82 122.631  27
   2   2  -4 1226.48 100.895  18
   2  -2  -4 1325.55 78.6527  21
   2  -2  -4 1105.53 125.441  24
  -2   2   4 1354.02 84.7977   1
  -2   2   4 1284.10 105.992  29
   2  -2  -4 1079.94 111.182  17
   2  -2  -4 1348.22 74.6164  20
   2  -2  -4 1349.85 116.174   8
   2  -2  -4 1306.42 139.582  12
   2   2  -4 1387.79 133.897   2
   2  -2  -4 1187.95 92.0341  10
  -2  -2   4 1147.20 125.563   3
   2   2  -3 84773.3 1700.59  27
  -2  -2   3 85210.2 1766.01  21
   2   2  -3 84205.0 1739.16  29
   2  -2  -3 87895.2 1592.74  10
   2   2  -3 89745.8 1618.49  17
  -2   2   3 84804.7 1704.31   6
  -2  -2   3 85163.1 1655.72  22
   2   2  -3 84886.8 1645.95  18
  -2  -2   3 82889.4 1643.68  23
  -2  -2   3 81730.9 1698.64  16
  -2   2   3 82422.9 1647.04  29
   2   2  -3 81116.6 1732.30  13
  -2   2   3 84948.3 1695.82  19
   2  -2  -3 95800.8 1639.61   8
  -2   2   3 91327.1 1529.69   1
  -2   2   3 83794.8 1697.67   5
   2  -2  -3 82558.9 1716.56  28
   2   2  -3 85311.3 1700.52   6
  -2  -2   3 84544.2 1707.08   3
  -2  -2   3 87846.8 1677.36   1
  -2  -2   3 94025.1 1650.83  14
   2  -2  -3 90389.8 1620.63  17
   2  -2  -3 88236.1 1666.61   4
  -2   2   3 85719.1 1765.67  18
   2   2  -3 84874.4 1660.49  25
   2  -2  -3 88485.4 1580.51  21
   2  -2  -2 119745. 2047.14   4
   2   2  -2 116114. 2140.43  25
   2  -2  -2 123207. 2075.02   8
  -2  -2   2 113833. 2136.93   3
   2  -2  -2 114092. 2167.06  26
   2   2  -2 111294. 2153.00   6
  -2   2   2 110582. 2203.24  18
  -2  -2   2 113619. 2127.05  22
  -2   2   2 113497. 2156.48   6
  -2  -2   2 114383. 2186.13  21
  -2   2   2 109013. 2115.98  29
  -2  -2   2 109980. 2154.02  16
   2  -2  -2 115306. 2074.61  10
  -2  -2   2 115024. 2065.61   1
   2   2  -2 113125. 2097.13  18
   2   2  -2 110959. 2152.96  13
  -2   2   2 114647. 2014.36   2
   2   2  -2 112044. 2162.36  29
   2  -2  -2 112619. 2193.09  28
   2  -2  -2 119197. 2077.01  21
  -2   2   2 114201. 2170.40  19
  -2  -2   1 249375. 4565.69  16
  -2   2   1 275175. 4458.73   2
  -2   2   1 249535. 4529.63  29
  -2  -2   1 267097. 4551.00  21
  -2   2   1 263781. 4591.92  18
   2   2  -1 259709. 4562.52  25
   2  -2  -1 262298. 4584.25  16
   2   2  -1 258032. 4498.00  18
   2  -2  -1 260715. 4545.21   3
  -2   2   1 268751. 4596.59  19
   2  -2  -1 269265. 4497.19  21
  -2   2   1 265927. 4562.08   6
  -2  -2   1 279042. 4468.91  12
   2  -2  -1 264469. 4519.27  10
   2   2  -1 264627. 4571.59   6
  -2  -2   1 267032. 4564.95  22
  -2  -2   1 259958. 4506.46   3
   2  -2  -1 298592. 4382.91   4
  -2  -2   1 279405. 4402.22   1
   2   2  -1 258025. 4510.68  13
   2   2  -1 259608. 4538.51  29
   2  -2  -1 256403. 4515.63  26
   2   2   0 311835. 5359.32  19
   2   2   0 307162. 5385.08  18
  -2   2   0 314041. 5427.15  18
  -2  -2   0 334733. 5392.92  20
  -2  -2   0 324130. 5339.16  28
  -2  -2   0 297611. 5439.74  16
   2  -2   0 309102. 5453.27   3
  -2   2   0 317720. 5419.91   6
   2  -2   0 324308. 5392.82  21
  -2  -2   0 336941. 5367.72  12
  -2   2   0 323991. 5383.60   2
   2   2   0 308097. 5444.79   6
  -2  -2   0 335364. 5225.45   1
   2   2   0 308867. 5461.71  25
   2  -2   0 329490. 5345.37  26
   2   2   0 309462. 5390.16  29
  -2   2   0 328581. 5262.06  25
  -2  -2   0 341313. 5484.15   8
   2  -2   0 309333. 5446.46  16
  -2  -2   0 325823. 5296.25  24
   2   2   0 321625. 5353.09  13
  -2   2   0 321529. 5482.44  19
  -2  -2   0 321915. 5383.34  21
  -2  -2   0 305544. 5336.36   3
   2   2   1 152358. 2702.75  13
   2   2   1 151615. 2787.97  18
  -2  -2  -1 146225. 2809.33  16
   2  -2   1 153007. 2815.09  16
  -2   2  -1 152726. 2780.33  18
  -2  -2  -1 155413. 2690.85  28
  -2  -2  -1 154172. 2688.42   3
   2   2   1 146324. 2862.49  25
  -2  -2  -1 144253. 2789.77  11
  -2   2  -1 154129. 2704.26  17
  -2   2  -1 154689. 2776.85   6
  -2  -2  -1 163343. 2835.93   8
   2   2   1 148580. 2824.57   6
  -2   2  -1 161240. 2773.39  15
  -2   2  -1 152772. 2853.60  19
  -2  -2  -1 150731. 2736.34  21
   2   2   1 148079. 2779.05   5
  -2  -2  -1 158266. 2757.09  20
   2   2   1 154634. 2762.30  29
   2  -2   1 150494. 2851.05   3
  -2  -2  -1 156311. 2704.77  24
  -2  -2  -1 156703. 2578.65   2
  -2  -2  -1 155468. 2715.27  17
  -2  -2  -1 159820. 2780.57  12
   2  -2   1 160602. 2683.83  26
  -2   2  -1 155512. 2811.19   2
   2  -2   1 151616. 2790.56  21
  -2   2  -1 152958. 2739.33  20
   2   2   1 159133. 2737.06  19
  -2   2  -1 161637. 2594.97  25
   2   2   2 6290.40 268.155  29
   2   2   2 6922.16 245.502  13
  -2  -2  -2 6779.01 300.159  12
  -2  -2  -2 7038.86 207.549   2
   2   2   2 6861.78 262.223  19
  -2  -2  -2 6869.29 224.338   3
  -2   2  -2 6657.58 282.200  18
  -2  -2  -2 7102.61 321.083   4
   2  -2   2 6039.07 293.122  21
  -2   2  -2 6551.85 278.062  17
   2   2   2 6532.03 285.687   5
  -2  -2  -2 6426.47 302.030  11
  -2   2  -2 6566.44 319.777   2
  -2   2  -2 6514.10 287.070  15
   2  -2   2 7008.12 179.983  22
   2  -2   2 6632.41 296.927  16
  -2  -2  -2 6703.18 283.925  17
  -2   2  -2 6526.93 272.078   6
   2   2   2 6333.24 303.466   6
  -2  -2  -2 6411.96 298.196   8
  -2  -2  -2 6705.86 279.955  20
   2  -2   2 6844.83 223.342  26
  -2  -2  -2 6954.98 271.549  24
  -2   2  -2 6731.55 293.045  20
   2  -2   2 6555.70 325.538   3
  -2   2  -2 6926.08 190.773  25
  -2  -2  -3 1706.92 157.623  17
   2  -2   3 1714.68 168.414   3
   2  -2   3 1967.88 108.523  26
  -2  -2  -3 1950.15 167.223   8
  -2  -2  -3 1970.29 118.140   2
  -2  -2  -3 1903.01 95.8600   3
   2   2   3 1777.81 117.986  13
   2   2   3 1812.38 125.311  19
  -2  -2  -3 1756.33 160.059  12
   2  -2   3 1950.73 126.654   7
  -2   2  -3 1800.50 159.035  17
  -2  -2  -3 1721.27 140.629  24
  -2   2  -3 1813.06 128.129   4
  -2   2  -3 1905.58 141.643   6
  -2   2  -3 1870.38 135.822  11
  -2  -2  -3 2024.04 157.204  20
   2  -2   3 1643.94 145.721  16
  -2  -2  -3 2366.84 197.272   4
  -2   2  -3 1539.87 135.139  18
  -2   2  -3 1781.53 162.534  20
   2   2   3 1819.40 160.580   6
   2  -2   3 2210.74 178.320  21
  -2  -2  -3 1392.10 145.963  11
   2   2   3 1854.91 139.459  29
   2   2   3 1585.24 143.989   5
   2  -2   3 2028.13 93.4649  22
  -2   2  -3 1651.09 172.952   2
  -2   2  -3 1842.35 159.471  15
  -2   2  -4 2381.80 191.661  15
  -2   2  -4 1528.72 161.725  17
  -2  -2  -4 1969.30 184.094  17
   2  -2   4 1697.63 126.457   7
  -2  -2  -4 1536.52 177.449   4
   2   2   4 1524.88 117.234  19
  -2   2  -4 1679.51 188.259   2
  -2  -2  -4 1666.46 149.249  24
   2   2   4 1386.63 144.347   5
  -2   2  -4 1727.38 161.951  27
  -2   2  -4 1478.65 126.843  11
   2  -2   4 1860.23 180.297   3
   2   2   4 1750.70 120.751  13
  -2  -2  -4 1740.26 75.4744   3
  -2  -2  -4 1792.34 157.334  20
  -2  -2  -4 1901.46 137.063   2
  -2  -2  -4 1493.22 159.449   8
   2   2   4 1826.21 161.827   6
   2  -2   4 1773.48 174.023  21
  -2  -2  -4 1741.46 174.510  12
  -2   2  -4 1784.45 178.751  20
   2   2   4 1507.36 130.944  29
   2  -2   4 1957.44 106.307  22
  -2  -2  -4 1396.06 153.638  11
  -2   2  -4 1685.36 141.135   4
   2  -2   4 1621.31 149.750  16
   2  -2   4 1689.69 102.689  26
  -2  -2  -5 140425. 2711.65  20
  -2   2  -5 142828. 2879.75   2
  -2  -2  -5 140608. 2866.25   4
   2  -2   5 146146. 2482.23  26
   2   2   5 136175. 2592.44  29
  -2   2  -5 138976. 2792.81  20
   2  -2   5 147186. 2500.74  22
   2  -2   5 144166. 2584.90   7
  -2  -2  -5 142271. 2621.26   2
   2  -2   5 138794. 2674.62  16
   2  -2   5 138427. 2754.33  21
  -2   2  -5 138459. 2594.44  11
  -2  -2  -5 137338. 2797.82  17
  -2   2  -5 140380. 2699.94  27
  -2  -2  -5 142382. 2690.99  24
   2  -2   5 139777. 2767.11   3
   2  -2   5 142814. 2378.37  23
  -2  -2  -5 146161. 2756.45   8
  -2   2  -5 142068. 2753.42  15
  -2   2  -5 145484. 2800.47  17
  -2  -2  -5 135537. 2740.82  11
   2   2   5 146081. 2542.74  19
  -2  -2  -5 140834. 2776.27  12
   2   2   5 142856. 2526.92  13
  -2   2  -5 140122. 2679.07   4
  -2  -2  -6 95014.2 2006.91   8
  -2  -2  -6 97312.9 2164.47   4
   2  -2   6 92912.2 2022.72  21
  -2  -2  -6 93648.9 2097.70  17
  -2   2  -6 97035.8 2090.52  20
  -2   2  -6 95877.0 1863.67  11
   2  -2   6 92015.0 1938.90  16
   2  -2   6 97180.3 1651.37  23
  -2   2  -6 95573.3 1963.92  27
  -2  -2  -6 95934.1 1914.35   2
   2  -2   6 97063.0 1747.67  26
  -2   2  -6 99900.5 2045.82  15
  -2   2  -6 94366.7 2148.83   2
   2  -2   6 94723.9 2008.66   3
   2   2   6 93407.0 1849.81  29
  -2   2  -6 95542.8 1982.35   4
   2   2   6 92885.5 1780.53  13
  -2  -2  -6 94573.8 2046.00  12
  -2   2  -6 94283.5 2079.51  17
  -2  -2  -6 90523.2 2003.22  11
   2   2   6 91168.5 1790.06  19
   2  -2   6 95557.0 1783.58  22
  -2  -2  -6 93297.6 1991.51  20
   2  -2   6 95813.9 1858.70   7
  -2  -2  -6 93852.6 1963.00  24
  -2  -2  -7 161510. 3107.04  24
   2  -2   7 164048. 2848.84  26
   2  -2   7 162929. 2748.25  23
  -2  -2  -7 160171. 3152.55  11
  -2   2  -7 162871. 2974.76  11
  -2  -2  -7 158678. 3054.10   2
  -2  -2  -7 162227. 3286.47  17
  -2   2  -7 158742. 3160.67  15
   2  -2   7 164945. 3087.79  16
   2  -2   7 156380. 2898.24  22
   2  -2   7 158803. 3112.82   3
   2   2   7 160650. 2879.07  13
  -2  -2  -7 161587. 3343.77   4
  -2   2  -7 163684. 3327.92   2
  -2  -2  -7 163784. 3211.08  12
   2  -2   7 159877. 2980.31   7
   2   2   7 159806. 2893.77  19
  -2   2  -7 159605. 3257.25  17
   2  -2   7 157569. 3165.18  21
  -2  -2  -7 162104. 3154.26  20
  -2  -2  -7 159196. 3141.63   8
   2   2   7 158922. 2947.61  29
  -2   2  -7 163734. 3155.45   4
  -2   2  -7 158130. 3237.45  20
  -2   2  -7 157070. 3069.72  27
  -2  -2  -8 17718.0 766.649  17
  -2  -2  -8 17909.1 696.452  20
  -2   2  -8 17784.0 696.578   4
  -2  -2  -8 17574.5 642.920   2
  -2   2  -8 17487.9 751.891  17
  -2   2  -8 17365.0 772.808   2
  -2   2  -8 17313.3 700.410  15
   2   2   8 17479.7 516.412  13
   2  -2   8 17638.5 436.352  23
  -2  -2  -8 16511.5 695.958  12
  -2   2  -8 16915.7 628.834  27
   2  -2   8 17366.1 500.972  26
   2  -2   8 18350.0 654.977  16
  -2  -2  -8 17569.2 690.265  11
   2  -2   8 17871.7 653.965   3
  -2  -2  -8 17407.5 792.339   4
  -2  -2  -8 17424.2 664.650  24
   2  -2   8 17574.1 550.451  22
   2  -2   8 16914.8 686.154  21
  -2   2  -8 18100.7 752.916  20
  -2  -2  -8 17273.7 684.439   8
   2   2   8 16536.8 525.042  19
  -2   2  -8 17693.9 579.392  11
   2   2   8 17883.8 556.648  29
   2  -2   9 6763.24 395.757  16
  -2   2  -9 6566.06 463.511  20
  -2   2  -9 6895.49 493.694   2
   2  -2   9 6832.57 335.242  22
  -2  -2  -9 6979.50 406.101   2
  -2   2  -9 7356.79 451.489   4
   2  -2   9 7287.91 447.768  21
  -2   2  -9 6930.09 483.949  17
  -2  -2  -9 6486.28 421.652   8
  -2   2  -9 7214.44 355.480  11
  -2  -2  -9 7324.74 441.038  11
  -2   2  -9 7080.13 447.105  15
  -2  -2  -9 7025.20 456.757  12
  -2  -2  -9 6360.08 424.673  20
  -2   2  -9 6446.94 379.622  27
   2   2   9 7226.43 333.341  29
   2  -2   9 6647.95 296.077  26
   2  -2   9 7107.79 399.287   3
  -2  -2  -9 8458.48 455.781  24
   2   2   9 6767.78 317.409  19
  -2  -2  -9 7082.45 514.646   4
   2  -2   9 6765.44 252.742  23
  -2  -2  -9 6812.50 488.233  17
   2  -2  10 6755.00 354.406  22
   2  -2  10 7013.83 459.762  21
  -2  -2 -10 5912.48 421.630   8
   2  -2  10 6747.02 390.640   3
   2  -2  10 6856.06 414.594  16
  -2   2 -10 6178.49 485.434  17
  -2   2 -10 6967.74 365.191  11
   2  -2  10 6551.90 263.224  23
  -2   2 -10 6861.74 501.280  20
  -2  -2 -10 6460.86 453.941  12
   2   2  10 6304.42 321.675  19
  -2  -2 -10 7382.59 550.864   4
  -2   2 -10 6168.42 438.855   4
  -2  -2 -10 6688.86 432.575  24
  -2   2 -10 6695.79 514.135   2
   2  -2  10 6935.92 309.308  26
  -2   2 -10 6187.37 383.105  27
   2   2  10 6417.04 328.814  29
  -2  -2 -10 6690.23 441.322  11
  -2  -2 -10 6832.19 516.666  17
  -2  -2 -10 6752.76 424.103   2
  -2   2 -10 6605.30 455.119  15
  -2  -2 -10 6657.75 457.445  20
  -2   2 -11 19626.9 870.884   4
   2  -2  11 21451.8 631.942  26
   2  -2  11 20523.5 739.579   3
  -2  -2 -11 20708.3 1002.82   4
   2   2  11 21417.4 672.748  19
  -2  -2 -11 20465.3 841.063  11
  -2   2 -11 19380.4 848.061  15
   2  -2  11 20682.5 709.140  22
  -2   2 -11 21443.8 971.911  17
  -2   2 -11 22718.5 736.903  11
   2  -2  11 22000.4 825.685  16
   2  -2  11 20020.7 856.283  21
   2   2  11 21627.3 672.958  29
  -2  -2 -11 19856.3 847.091   8
  -2  -2 -11 19613.4 821.541  24
  -2  -2 -11 21075.3 827.024   2
  -2  -2 -11 20537.9 887.117  20
  -2  -2 -11 21484.9 991.242  17
  -2   2 -11 21793.8 991.197   2
  -2   2 -11 21226.5 957.238  20
  -2   2 -11 21414.7 784.050  27
  -2  -2 -11 19591.2 868.518  12
  -2  -2 -12 44003.6 1590.07   4
  -2  -2 -12 42249.4 1368.80   8
  -2   2 -12 42981.1 1430.25   4
  -2  -2 -12 44807.4 1433.77  12
  -2   2 -12 43891.7 1546.16   2
   2  -2  12 43001.5 1188.59   3
   2   2  12 43790.9 1125.49  19
  -2  -2 -12 45353.1 1365.35   2
   2  -2  12 43702.8 1309.97  16
  -2   2 -12 40833.8 1373.94  15
  -2   2 -12 41538.8 1507.83  17
  -2  -2 -12 42543.9 1433.23  20
  -2  -2 -12 44428.1 1562.68  17
  -2  -2 -12 43915.7 1371.46  11
  -2  -2 -12 42436.4 1353.31  24
   2  -2  12 45994.3 1208.09  22
  -2   2 -12 43753.8 1263.86  27
   2   2  12 46345.5 1121.38  29
  -2   2 -12 45695.4 1203.97  11
  -2   2 -12 44780.1 1520.63  20
   2  -2  12 40464.5 1354.99  21
  -2   2 -13 24399.5 1042.02  15
  -2  -2 -13 27674.6 1133.66  20
  -2  -2 -13 27273.0 1037.14   2
  -2  -2 -13 24494.5 1051.78  12
  -2  -2 -13 25215.0 1012.78  11
  -2   2 -13 25339.2 1165.00   2
  -2   2 -13 26042.5 932.382  27
   2  -2  13 25648.1 977.363  16
   2  -2  13 25754.4 876.568  22
  -2   2 -13 25168.6 1085.10   4
   2   2  13 26945.4 999.202  18
  -2   2 -13 26384.0 1191.34  17
  -2   2 -13 27655.8 892.609  11
  -2  -2 -13 24389.6 1005.24  24
   2  -2  13 26000.7 1056.96  21
  -2  -2 -13 24939.8 1181.93  17
  -2  -2 -13 24995.1 1195.99   4
  -2   2 -14 13759.9 857.769   2
  -2   2 -14 12970.3 639.750  27
  -2   2 -14 10381.8 682.623  15
  -2  -2 -14 10453.4 656.895  24
  -2  -2 -14 11896.0 732.159  12
  -2  -2 -14 11886.6 753.606  20
   2   2  14 12353.0 670.806  18
   2  -2  14 10655.2 682.716  21
   2  -2  14 12333.5 671.173  16
   2   2  14 11309.6 665.106   1
   2  -2  14 12122.9 589.178  22
  -2  -2 -14 11392.3 814.581   4
  -2   2 -14 11740.4 743.708   4
  -2   2 -14 12395.2 829.356  17
  -2  -2 -14 11892.5 826.921  17
  -2  -2 -15 8456.95 642.322  12
   2  -2  15 10396.6 689.325  21
  -2   2 -15 9456.92 674.392  15
  -2  -2 -15 10308.7 731.760  20
  -2  -2 -15 9584.01 648.657  24
   2   2  15 11455.3 663.321  18
   2   2  15 9885.18 641.629   1
   2  -2  15 10564.7 591.894   7
  -2   2 -15 8767.06 669.024   4
  -2  -2 -15 10210.4 805.900   4
  -2   2 -15 9271.03 733.746   2
   2   2  15 9887.30 724.687  14
   2   2  15 10040.2 618.661  23
  -2   2 -15 8366.71 715.729  17
  -2  -2 -15 10343.4 796.635  17
   2  -2  15 10188.3 627.143  16
  -2   2 -16 1849.05 327.130   4
   2  -2  16 1079.79 236.782  21
   2   2  16 1671.16 315.168  14
  -2  -2 -16 1588.40 347.907   4
  -2   2 -16 2076.48 374.696   2
  -2  -2 -16 1764.38 368.725  17
   2   2  16 2223.84 296.208  23
   2   2  16 1687.52 277.878   1
   2  -2  16 2169.22 285.659   7
  -2   2 -16 1849.25 359.118  17
  -2  -2 -16 1144.87 243.902  24
  -2  -2 -16 1706.55 328.167  20
  -2  -2 -16 1119.16 257.290  12
   2   2  16 2168.83 297.433  18
  -2   2 -16 1641.66 302.303  15
   2  -2  16 1823.33 282.871  16
   2  -2  17 2822.28 358.736  16
   2  -2  17 1640.39 349.706   1
   2  -2  17 1916.76 376.006  14
  -2  -2 -17 2466.00 401.330  20
   2   2  17 2577.99 376.171  22
  -2   2 -17 2649.45 406.659   4
  -2   2 -17 2381.66 424.097  17
  -2  -2 -17 2085.79 416.674  17
  -2   2 -17 2671.08 444.357   2
  -2  -2 -17 2431.96 371.385  12
   2   2  17 2046.54 372.439  14
  -2   2 -17 2016.87 354.372  15
   2  -2  17 2659.55 388.636  21
   2   2  17 2353.23 330.971   1
  -2  -2 -17 1860.15 387.548   4
  -2   2 -18 5808.87 666.518  17
   2  -2  18 4504.86 572.553   1
   2   2  18 5612.62 545.949   1
  -2  -2 -18 5949.90 691.255  17
  -2  -2 -18 5635.61 614.124  20
   2  -2  18 6020.80 581.661  21
   2   2  18 6061.96 579.938  22
  -2   2 -18 5366.25 594.102   4
  -2  -2 -18 4631.02 609.116   4
  -2   2 -18 5698.78 633.729   2
  -2  -2 -18 5768.23 579.548  12
   2  -2  18 5030.58 621.086  14
   2   2  18 4687.05 566.405  14
  -2   2 -18 4535.96 527.977  15
  -2  -2 -19 14570.4 1108.07  17
  -2   2 -19 14405.4 995.701   4
   2   2  19 12163.9 950.439  14
   2   2  19 14091.6 918.689  22
  -2  -2 -19 13720.4 1081.12   4
   2  -2  19 13232.8 1051.90  14
  -2   2 -19 13130.3 916.330  15
   2  -2  19 13839.0 1026.16   1
  -2   2 -19 13911.5 1069.63  17
   2  -2  19 15305.9 971.395  21
   2   2  20 4167.41 572.935  14
   2  -2  20 4917.10 572.827  21
   2  -2  20 5002.42 631.795   1
  -2  -2 -20 3917.16 589.143   4
   2   2  20 5008.14 562.681  22
  -2  -2 -20 4826.67 660.127  17
  -2   2 -20 4406.80 629.176  17
   2  -2  20 5665.66 708.722  14
  -2   2 -20 3953.32 525.749  15
   2   2  21 4795.01 559.818  22
   2  -2  21 3590.60 560.425   1
  -2   2 -21 4775.10 674.003  17
  -2   2 -21 4542.01 576.802  15
  -2  -2 -21 4116.06 641.183  17
   2  -2  21 3794.22 610.621  14
   2   2  21 3285.25 541.172  14
   2   2  22 125.991 178.079   5
  -2  -2 -22 432.127 233.048  17
   2   2  22 603.778 293.624  14
  -2   2 -22 284.755 255.051  17
  -2   2 -22 0.43385 183.702  15
   2  -2  22 22.5801 216.941  14
   2  -2  22 192.991 227.863   1
   2  -2  23 90.2008 192.354   1
   2   2  23 174.450 202.043   5
   2   2  23-7.03634 165.916  14
  -2  -4  24 633.384 306.235   1
   2  -4 -24 1510.17 351.014  24
  -2   4  24 1205.34 354.444  22
  -2  -4  24 251.333 240.316  14
   2   4 -24 908.091 354.868  17
  -2   4  24 1167.11 346.424   5
   2   4 -24 1428.57 346.403  15
   2  -4 -24 1341.16 330.204  12
   2  -4 -24 838.177 329.900  17
  -2   4  24 410.368 231.665  14
   2  -4 -24 1005.21 352.623   4
  -2   4  23 2130.29 415.809   6
  -2   4  23 2137.79 416.152   5
   2   4 -23 1816.10 382.247  15
   2   4 -23 1738.60 406.122  17
   2  -4 -23 1391.87 343.177  12
  -2   4  23 2342.62 437.272  14
   2  -4 -23 1918.50 379.456  24
  -2  -4  23 1775.33 422.806  14
  -2  -4  23 2211.99 462.408   1
  -2   4  23 1394.46 353.511  22
   2  -4 -23 2122.80 479.582  17
   2  -4 -23 1796.05 443.417   4
   2  -4 -22 897.232 286.124  12
  -2   4  22 604.362 281.205   5
  -2   4  22 1402.67 365.978  14
   2  -4 -22 231.382 211.185  17
   2   4 -22 845.595 276.773  17
  -2  -4  22 772.145 306.606  14
   2  -4 -22 940.862 318.240   4
  -2  -4  22 810.415 342.974   1
  -2  -4  22 1015.97 296.657  16
   2  -4 -22 772.978 269.996  24
  -2   4  22 1068.97 314.899  22
   2   4 -22 905.947 290.624  15
  -2   4  22 1038.88 313.477   6
  -2   4  21 8795.64 770.935  14
  -2  -4  21 9034.94 877.979  14
  -2  -4  21 9700.96 901.892   1
  -2   4  21 9988.87 813.768   5
  -2   4  21 9159.41 815.910  22
   2  -4 -21 9603.97 911.239   4
   2   4 -21 8667.03 769.985  15
  -2   4  21 10965.6 833.317   6
  -2   4  21 9020.92 748.775  23
  -2  -4  21 9526.00 802.506  21
  -2  -4  21 9319.19 771.362  16
   2   4 -21 8808.65 826.713  17
   2  -4 -21 8761.59 834.473  17
   2  -4 -21 8950.29 739.641  24
   2  -4 -21 8634.51 758.456  12
  -2   4  20 1025.20 265.040  14
  -2  -4  20 1351.85 305.557  21
  -2  -4  20 983.756 275.896  16
   2  -4 -20 1165.31 292.073  12
   2  -4 -20 616.184 221.766  24
  -2   4  20 1218.41 315.184   5
   2   4 -20 1053.13 269.107  15
  -2   4  20 1152.43 303.029  22
   2   4 -20 677.934 254.669  17
  -2  -4  20 411.992 203.870  14
  -2   4  20 911.069 259.090  23
  -2  -4  20 803.244 301.296   1
   2  -4 -20 1076.25 331.867  17
   2   4 -20 1116.31 256.010  27
  -2   4  20 924.315 250.421   6
   2  -4 -20 617.834 272.785   4
  -2   4  19 5810.28 585.921   5
  -2  -4  19 6004.09 604.136  21
  -2  -4  19 5472.01 632.722   1
  -2   4  19 5973.85 614.707  22
  -2  -4  19 4989.62 611.951  14
  -2  -4  19 5868.67 576.647  16
   2  -4 -19 5610.22 553.337  24
   2   4 -19 4796.83 534.750  15
   2   4 -19 6286.04 579.447  27
   2   4 -19 5545.68 619.517  17
  -2   4  19 6109.41 590.435  23
   2  -4 -19 6031.23 684.767   4
   2  -4 -19 5530.11 570.267  12
  -2   4  19 5296.06 564.852  14
   2  -4 -19 5577.04 629.117  17
   2   4 -18 173.958 139.463  27
   2   4 -18 16.9298 158.603  15
  -2  -4  18 55.5142 134.485  21
   2   4 -18 208.664 178.483  17
   2  -4 -18 503.913 237.308   4
   2   4 -18 382.979 162.216   4
   2  -4 -18 354.078 177.236  24
  -2  -4  18 289.466 219.671  14
  -2   4  18-22.3173 125.470  18
  -2   4  18 293.486 171.821  14
  -2   4  18 187.420 162.223  23
  -2  -4  18 191.172 201.062   1
   2  -4 -18 86.5044 146.135  17
   2  -4 -18 334.363 164.292  12
  -2  -4  18 281.718 178.108  16
  -2   4  18 135.422 175.541   5
  -2  -4  17 717.263 208.321  16
   2   4 -17 89.3843 136.892   4
   2   4 -17 216.443 155.494  17
  -2   4  17 84.5203 149.503  23
   2  -4 -17 318.703 162.887  17
  -2  -4  17 475.466 201.995  21
  -2   4  17 90.2608 124.143  14
  -2  -4  17 154.280 161.085  14
  -2   4  17 232.655 153.041   5
  -2  -4  17 49.8688 167.115   1
   2  -4 -17 154.145 160.806  24
   2  -4 -17 526.499 232.348   4
   2   4 -17 52.0011 149.263  15
  -2   4  17 421.395 171.730  18
   2  -4 -17 56.0173 129.827  12
   2   4 -17 371.366 179.955  27
  -2   4  16 899.944 228.307  14
   2  -4 -16 1189.36 264.344  12
   2   4 -16 1061.77 252.131  15
  -2  -4  16 1082.03 296.607   1
   2  -4 -16 1309.45 238.230  20
   2  -4 -16 1040.66 292.927   4
  -2   4  16 1199.51 250.124  18
  -2   4  16 1326.39 219.165  19
  -2   4  16 1335.12 284.399   5
   2  -4 -16 763.117 193.406  24
  -2  -4  16 1089.39 253.137  21
   2   4 -16 1030.54 251.821  17
   2  -4 -16 1504.71 315.252  17
   2  -4 -16 1137.91 237.743   8
  -2  -4  16 1024.49 237.782  16
   2   4 -16 1243.14 249.654  27
   2   4 -16 951.666 205.696   4
  -2  -4  16 1011.37 276.149  14
  -2  -4  16 986.548 201.836   3
  -2  -4  15 49821.8 1790.54   1
   2  -4 -15 49263.0 1610.50   8
  -2  -4  15 53114.7 1449.98  22
  -2   4  15 52113.1 1665.01  18
  -2  -4  15 50294.5 1662.86  16
   2  -4 -15 44989.5 1625.44  12
  -2   4  15 49351.8 1644.31   5
  -2  -4  15 51293.0 1719.87  21
  -2  -4  15 51267.8 1799.02  14
   2   4 -15 45956.9 1631.22  15
   2  -4 -15 49831.3 1733.84  17
   2   4 -15 52697.5 1659.69  27
  -2   4  15 52669.7 1502.56  19
   2  -4 -15 57216.3 1613.85  20
   2   4 -15 55133.0 1618.41   4
  -2   4  15 49577.2 1612.37  14
   2  -4 -15 48515.2 1604.13  24
  -2  -4  15 50998.4 1556.52   3
   2  -4 -15 48593.4 1815.01   4
   2   4 -15 51448.2 1724.76  17
  -2   4  14 8545.71 576.336  14
  -2   4  14 8391.36 604.557   5
   2   4 -14 8584.08 619.012  17
  -2  -4  14 8931.38 496.226  22
  -2  -4  14 8959.24 674.854   1
   2   4 -14 8552.39 596.037  27
  -2  -4  14 8614.91 555.853   3
  -2   4  14 8867.58 527.838  19
  -2   4  14 8858.38 604.911  18
   2  -4 -14 9114.25 641.032  17
   2  -4 -14 8093.47 604.026  12
  -2  -4  14 8903.64 636.152  21
   2   4 -14 8895.93 619.863  15
   2  -4 -14 10016.1 575.789  20
   2   4 -14 9246.31 567.448   4
  -2  -4  14 9609.58 686.474  14
   2  -4 -14 9260.12 610.593  24
   2  -4 -14 8435.99 574.152   8
  -2  -4  14 8534.25 602.959  16
   2   4 -14 9424.32 696.546   2
   2  -4 -14 9252.24 695.751   4
  -2  -4  13 48893.0 1315.15  22
  -2   4  13 48240.8 1518.55  18
   2  -4 -13 45988.1 1537.40  12
  -2  -4  13 49158.4 1535.61  16
  -2  -4  13 46481.2 1616.20   1
  -2  -4  13 51147.8 1492.33   3
  -2   4  13 48607.5 1229.22   1
   2   4 -13 48474.1 1409.64   4
   2   4 -13 46959.0 1540.93  15
  -2  -4  13 44701.5 1537.89  21
   2  -4 -13 46907.3 1638.52   4
   2   4 -13 48430.8 1647.01   2
   2  -4 -13 43045.7 1416.39   8
  -2   4  13 49113.4 1533.38   5
  -2   4  13 46728.6 1361.46  19
  -2  -4  13 49022.8 1614.51  14
   2  -4 -13 45606.5 1459.90  24
   2  -4 -13 52178.3 1417.04  20
   2   4 -13 47745.1 1508.86  27
   2   4 -13 48653.0 1538.61  17
  -2   4  13 44593.6 1420.38  14
   2  -4 -13 49051.6 1570.70  17
   2   4 -12 119.763 113.449  27
  -2   4  12 352.613 103.606  19
   2   4 -12 320.341 147.283  15
  -2  -4  12 537.533 175.737   1
   2   4 -12 862.387 214.761   2
   2  -4 -12 86.9561 124.158  12
  -2   4  12 259.549 123.008  18
  -2  -4  12 552.633 105.424  23
  -2  -4  12 384.123 128.738   3
   2  -4 -12 400.066 136.003  24
  -2  -4  12 443.985 169.674  21
  -2   4  12 759.515 185.018   5
   2  -4 -12 387.026 181.187   4
  -2  -4  12 687.984 190.074  14
   2  -4 -12 517.595 146.211   8
  -2  -4  12 438.533 142.636  16
  -2  -4  12 381.679 111.788  22
   2  -4 -12 336.588 135.376  17
   2   4 -12 276.321 119.922  17
  -2   4  12 530.569 104.813   1
   2   4 -12 335.015 113.278   4
   2  -4 -12 632.082 145.894  20
  -2   4  12 590.697 161.768  14
  -2   4  11 3206.92 286.875  19
  -2  -4  11 3606.52 249.915  23
  -2   4  11 3389.79 334.483   5
  -2   4  11 3344.60 230.877   1
   2   4 -11 3362.06 287.221   4
  -2  -4  11 3234.98 363.582   1
   2  -4 -11 3553.52 370.246  12
   2  -4 -11 4170.39 303.358  20
   2  -4 -11 2914.06 347.840   4
  -2   4  11 3633.77 246.823  29
  -2  -4  11 3467.06 273.934  22
   2   4 -11 3228.48 324.008  17
   2  -4 -11 3674.33 336.005  24
  -2  -4  11 3512.86 335.321   3
   2  -4 -11 3414.54 338.498  17
   2   4 -11 4260.98 397.334  15
  -2  -4  11 2835.33 322.680  14
  -2   4  11 3360.50 303.639  14
  -2   4  11 3695.77 358.496  18
  -2  -4  11 3516.65 349.612  16
   2   4 -11 2844.73 340.364   2
   2  -4 -11 3157.68 318.898   8
  -2  -4  11 3282.66 355.986  21
   2   4 -11 3561.37 349.615  27
   2   4 -10 959.037 194.085   2
   2  -4 -10 617.835 140.110   8
   2   4 -10 497.245 127.977  17
  -2  -4  10 786.652 130.576  22
   2   4 -10 675.147 174.344  27
  -2   4  10 930.135 157.039  14
   2   4 -10 550.224 154.131  15
  -2  -4  10 523.765 143.492  16
  -2   4  10 624.470 162.729  18
  -2  -4  10 762.624 116.322  23
   2  -4 -10 818.837 188.977   4
  -2   4  10 617.176 129.871  19
   2   4 -10 628.636 84.7140  11
  -2   4  10 702.932 94.8095   1
  -2   4  10 866.249 126.434  29
  -2   4  10 733.530 170.899   6
  -2   4  10 718.590 174.018   5
   2  -4 -10 693.089 120.720  20
  -2  -4  10 654.478 184.008  21
   2  -4 -10 687.315 152.003  24
   2   4 -10 719.436 87.2908   9
  -2  -4  10 730.116 168.285  14
   2   4 -10 905.622 143.581   4
  -2  -4  10 656.644 170.622   1
   2  -4 -10 831.600 163.895  17
  -2  -4  10 572.734 146.818   3
   2  -4 -10 612.935 162.879  12
   2   4  -9 46602.4 1174.85   4
   2  -4  -9 49351.0 1155.53  20
   2   4  -9 47066.1 1409.53  15
   2   4  -9 46982.7 1410.20   2
  -2   4   9 48267.6 1233.68  14
  -2   4   9 47885.4 1167.15  29
   2  -4  -9 46798.2 1296.56   8
  -2   4   9 44618.9 1354.46   6
  -2   4   9 47395.0 1359.90   5
  -2  -4   9 46567.0 1138.80  23
   2  -4  -9 48947.9 1079.50   3
  -2  -4   9 45700.5 1364.58  16
   2   4  -9 48001.1 1099.97  18
   2   4  -9 46915.0 1378.01  27
   2  -4  -9 44015.2 1382.73  12
  -2  -4   9 46580.2 1344.64  14
   2  -4  -9 48119.8 1313.66  17
  -2  -4   9 47198.1 1185.78  22
  -2  -4   9 45491.1 1395.88   1
  -2   4   9 48101.8 1020.17   1
  -2   4   9 43750.8 1245.56  19
   2   4  -9 48783.1 1047.46   9
  -2  -4   9 45135.5 1413.01  21
   2   4  -9 49088.1 1039.15  11
   2  -4  -9 46153.0 1393.51   4
  -2   4   9 46708.1 1391.05  18
   2   4  -9 46238.0 1221.42  25
   2  -4  -9 47083.8 1329.97  24
  -2  -4   9 45110.5 1360.13   3
   2   4  -9 47102.0 1286.84  17
  -2   4   8 14894.7 550.888  29
   2   4  -8 14950.7 465.728  11
   2  -4  -8 13945.4 601.018   8
   2   4  -8 14656.0 672.149   2
  -2   4   8 14301.6 660.198   6
  -2   4   8 13941.7 599.192  19
  -2   4   8 14308.8 678.347  18
   2   4  -8 13827.3 657.514  27
  -2  -4   8 14391.2 669.673   1
   2  -4  -8 14294.9 635.030  24
   2   4  -8 13602.0 552.941  25
   2   4  -8 14363.0 511.353   4
   2  -4  -8 14964.2 505.462   3
   2  -4  -8 14538.7 687.682  12
   2  -4  -8 14734.8 664.552   4
  -2   4   8 14666.5 406.919   1
  -2   4   8 14290.3 546.510  14
   2  -4  -8 15145.7 610.255  17
   2   4  -8 13866.0 672.928  29
  -2  -4   8 14403.3 696.975  21
   2  -4  -8 14700.0 490.921  20
  -2  -4   8 14352.1 544.137  22
   2   4  -8 14714.8 588.447  17
  -2  -4   8 14397.3 665.320   3
  -2  -4   8 14646.8 673.974  16
  -2  -4   8 13620.6 609.733  14
   2   4  -8 14551.5 506.578  18
   2   4  -8 13798.9 670.119  15
  -2   4   8 14095.7 647.481   5
   2   4  -8 14894.2 486.069   9
   2  -4  -7 98841.0 2081.77  17
   2   4  -7 100957. 2024.85  18
   2   4  -7 98096.1 2289.77  15
   2   4  -7 98261.7 2056.70  17
  -2   4   7 95950.8 2276.55  18
   2  -4  -7 97966.6 2198.90   4
  -2   4   7 99192.2 2231.99   5
  -2  -4   7 97169.1 2303.58  21
  -2  -4   7 98339.8 2253.75   3
  -2  -4   7 101602. 2264.49  16
  -2  -4   7 100601. 2052.70  22
   2  -4  -7 101039. 2145.60   8
   2   4  -7 101643. 2239.54   2
   2  -4  -7 98118.1 2198.00  24
   2   4  -7 99475.9 1980.91   9
  -2   4   7 101329. 1775.74   1
  -2   4   7 94715.6 2143.01  19
   2   4  -7 99569.9 2208.68   6
   2   4  -7 101003. 1954.03   4
  -2  -4   7 100573. 2145.82  14
   2   4  -7 97492.9 2067.74  25
  -2  -4   7 101505. 2247.14   1
   2   4  -7 99320.1 2313.34  29
   2   4  -7 101030. 2270.77  27
   2  -4  -7 98702.1 2304.35  12
   2  -4  -7 99997.8 1904.78  20
   2  -4  -7 100573. 2018.76   3
  -2   4   7 102508. 2268.69   6
  -2   4   7 97918.0 2073.43  29
  -2   4   6 36874.4 713.503   1
   2  -4  -6 35497.2 957.224   3
  -2  -4   6 37698.7 1000.89  14
   2  -4  -6 36602.9 941.966  17
  -2   4   6 36578.3 1101.74   5
  -2   4   6 37429.3 1121.70   6
   2   4  -6 37054.5 1121.05  27
  -2   4   6 35766.4 994.781  29
   2   4  -6 36557.8 983.672  25
   2  -4  -6 36913.9 1021.75   8
   2   4  -6 36096.6 939.398   9
  -2   4   6 37026.5 1152.92  18
   2   4  -6 36141.0 1058.92   2
   2   4  -6 35794.2 1142.63  15
   2   4  -6 36791.4 1087.13   6
   2  -4  -6 37006.5 1040.63   4
  -2  -4   6 36019.4 1109.56   3
   2  -4  -6 36458.2 1082.24  24
   2  -4  -6 37670.6 812.485  20
  -2   4   6 34395.0 1037.79  19
   2   4  -6 37395.5 993.173  18
  -2  -4   6 36765.4 1119.31  16
   2   4  -6 37004.1 930.759  17
  -2  -4   6 37198.0 1077.82   1
   2   4  -6 35666.9 1145.20  29
   2  -4  -6 39153.3 849.064  10
  -2  -4   6 36454.1 970.734  22
   2  -4  -6 37558.5 1166.31  12
  -2  -4   6 34749.1 1135.95  21
   2   4  -6 39298.1 855.713   4
   2   4  -5 70950.3 1349.42   4
   2   4  -5 69049.0 1666.58   6
  -2   4   5 70624.4 1286.87   2
  -2  -4   5 70843.2 1510.05  14
   2  -4  -5 70256.4 1440.09  17
   2   4  -5 67160.1 1543.51  25
   2  -4  -5 71439.6 1467.66  21
   2  -4  -5 69994.1 1557.97   4
  -2   4   5 68022.9 1581.29  29
   2  -4  -5 71670.3 1398.65  10
  -2   4   5 68303.0 1640.34  19
   2  -4  -5 73576.4 1321.80  20
   2  -4  -5 69584.5 1681.67  28
  -2  -4   5 71204.5 1615.74   1
   2   4  -5 69413.0 1690.26  27
   2   4  -5 65641.6 1411.31  17
  -2  -4   5 69420.2 1700.64   3
   2  -4  -5 67984.9 1572.59   8
   2   4  -5 68909.3 1588.48   2
  -2  -4   5 69392.1 1701.93  16
  -2   4   5 68285.5 1685.56   5
  -2  -4   5 66063.9 1723.79  21
   2   4  -5 69283.2 1601.80  18
  -2   4   5 69081.8 1699.00   6
   2   4  -5 69214.2 1745.71  29
   2  -4  -5 70549.2 1755.34  12
  -2   4   5 66168.1 1712.51  18
  -2  -4   5 68622.8 1541.09  22
   2  -4  -5 68556.3 1548.91   3
   2  -4  -5 66836.4 1644.13  24
  -2   4   4 189.769 87.7195   6
  -2  -4   4 245.351 64.6181  14
   2   4  -4 144.718 73.0510   6
  -2   4   4 390.303 116.888  18
  -2   4   4 271.263 97.8136  29
   2  -4  -4 131.336 93.3947  24
   2  -4  -4 267.726 75.7007   3
   2  -4  -4 147.323 85.4230   8
   2  -4  -4 32.0677 100.514  12
   2   4  -4 200.842 93.0292  18
  -2  -4   4 121.511 63.9011   1
  -2  -4   4 96.1887 75.8395  16
  -2  -4   4 62.5057 60.7867   3
   2   4  -4 266.275 49.8854   4
  -2  -4   4 191.054 102.239  21
  -2  -4   4 153.173 69.5801  22
   2   4  -4 114.534 64.5317   2
   2  -4  -4 99.6975 65.2557   4
   2  -4  -4 133.490 36.5014  20
  -2   4   4 156.942 77.0184  19
   2   4  -4 125.716 38.6782  17
   2   4  -4 304.056 119.838  29
   2  -4  -4 426.165 74.9408  10
   2  -4  -4 21.5872 61.7588  28
   2  -4  -4 124.573 44.3605  21
   2   4  -4 324.444 93.7138  25
   2  -4  -4 156.303 42.2622  17
  -2   4   4 105.211 28.9276   2
   2   4  -3 31719.8 1031.96  29
   2  -4  -3 37075.4 749.995  20
   2  -4  -3 33937.3 943.556   8
  -2  -4   3 34267.4 1056.95  16
   2  -4  -3 34908.1 863.071  10
   2  -4  -3 35591.1 942.968  21
   2  -4  -3 36432.4 728.732  17
   2   4  -3 33990.9 1025.51  13
  -2   4   3 33136.3 1016.43  19
   2  -4  -3 35611.3 841.126   4
  -2   4   3 33485.0 1068.32  18
   2   4  -3 36409.2 1056.59   6
  -2   4   3 34409.5 999.466  29
  -2  -4   3 34032.9 1018.34   3
   2  -4  -3 33586.9 967.780   3
   2   4  -3 35882.1 725.505  17
  -2  -4   3 33256.8 1047.19  21
  -2   4   3 35465.4 743.350   2
  -2  -4   3 35234.5 898.450   1
   2   4  -3 33070.8 992.524  18
  -2  -4   3 34830.1 955.593  22
  -2   4   3 34137.9 1039.35   6
   2   4  -3 33743.6 958.627  25
   2  -4  -3 34821.6 1060.10  28
  -2  -4   2 11088.0 551.303  16
   2   4  -2 12305.3 287.601  17
  -2   4   2 12004.7 551.093  19
  -2  -4   2 13172.4 432.791   1
   2   4  -2 10894.8 532.700  29
   2  -4  -2 12304.4 462.508  10
  -2  -4   2 11774.5 523.783   3
  -2   4   2 12687.5 586.896  18
   2  -4  -2 12316.3 509.335   8
   2   4  -2 12278.3 560.366   6
  -2   4   2 11720.9 531.420  29
  -2  -4   2 11155.2 536.474  21
   2  -4  -2 12217.5 371.499   4
   2  -4  -2 11582.3 494.775  21
  -2   4   2 12267.1 558.732   6
   2   4  -2 11413.3 522.228  13
  -2   4   2 12326.9 496.521  25
   2   4  -2 11490.3 519.005  18
   2  -4  -2 11945.1 519.770   3
  -2   4   2 12351.9 374.556   2
   2   4  -2 11824.8 511.969  25
   2  -4  -2 12264.0 282.700  17
   2   4  -1 224537. 4266.04  18
   2   4  -1 220268. 4214.94  13
  -2   4   1 235305. 4364.50  19
  -2  -4   1 224111. 4226.85   3
   2   4  -1 225555. 4259.28  25
   2  -4  -1 225925. 4269.92   3
  -2  -4   1 237130. 4230.02  12
  -2   4   1 230102. 4147.45  25
  -2  -4   1 228167. 4282.25  21
   2   4  -1 228241. 4306.13  29
   2   4  -1 223021. 4323.38   6
   2  -4  -1 233023. 4237.21  21
  -2   4   1 227622. 4324.81   6
   2  -4  -1 229607. 4167.84  10
   2  -4  -1 243787. 3852.46   4
  -2   4   1 233465. 4004.68   2
  -2  -4   1 237467. 3958.67   1
  -2   4   1 229435. 4359.38  18
  -2  -4   1 223768. 4355.94  16
   2  -4  -1 226802. 4368.10  16
  -2   4   1 220863. 4295.47  29
   2  -4   0 66297.8 1641.86  16
  -2  -4   0 66098.1 1551.66  21
  -2  -4   0 68596.5 1550.17  12
   2   4   0 62863.6 1540.32  19
  -2   4   0 68549.1 1437.09  25
   2   4   0 66044.8 1631.62   6
   2   4   0 66107.8 1579.81  18
   2   4   0 63852.7 1565.52  29
   2   4   0 66324.0 1594.12  25
  -2   4   0 64420.5 1617.63  18
   2  -4   0 64567.3 1547.43  21
  -2   4   0 65137.2 1616.05  29
  -2  -4   0 67471.7 1631.15   8
   2   4   0 64879.0 1493.95  13
  -2   4   0 65624.8 1629.35  19
  -2  -4   0 66262.7 1650.91  16
  -2  -4   0 64503.3 1508.44   3
  -2   4   0 65008.0 1396.18   2
  -2   4   0 64532.5 1592.44   6
  -2  -4   0 69313.6 1236.06   1
   2  -4   0 63275.6 1577.80   3
  -2  -4  -1 88903.4 1897.79  12
  -2  -4  -1 88277.3 1794.72  20
  -2  -4  -1 86332.4 1946.30   8
   2   4   1 84729.8 1898.10  29
  -2   4  -1 84149.3 1781.55   2
  -2   4  -1 85520.8 1928.55   6
  -2  -4  -1 81069.5 1965.18  16
  -2   4  -1 84821.5 1966.37  29
  -2  -4  -1 85030.5 1854.12  28
  -2  -4  -1 83241.8 1793.51  24
  -2   4  -1 83588.0 1970.95  19
   2  -4   1 85525.3 1974.76  16
  -2  -4  -1 86766.2 1865.26  21
   2   4   1 88895.0 1979.60  25
   2   4   1 86280.7 1990.69   6
  -2   4  -1 88462.6 1962.92  18
  -2  -4  -1 84812.1 1818.28   3
   2  -4   1 85393.0 1957.90   3
   2   4   1 85475.9 1798.52  13
  -2   4  -1 88067.6 1723.45  25
   2   4   1 80853.8 1861.70  19
   2  -4   1 87899.8 1925.31  21
   2   4   1 84067.3 1914.64  18
  -2  -4  -2 14901.7 447.117  17
  -2   4  -2 14151.4 428.094  17
   2   4   2 13516.2 562.339  19
  -2   4  -2 14885.3 464.171  25
   2  -4   2 14357.4 633.495   3
   2  -4   2 14417.5 631.266  16
   2   4   2 15721.2 626.058  18
  -2  -4  -2 15280.3 619.745   8
   2   4   2 14429.5 578.397  29
   2  -4   2 13927.8 596.135  21
  -2  -4  -2 14969.8 560.795  28
  -2   4  -2 14185.9 629.719  19
  -2  -4  -2 14807.2 595.038  12
  -2   4  -2 14325.3 596.816   6
   2   4   2 14306.3 514.242  13
  -2   4  -2 14951.9 609.415  18
   2   4   2 14243.7 634.174   6
   2  -4   2 14515.5 482.264  26
  -2  -4  -2 14091.8 517.708   3
  -2   4  -2 15687.4 611.334  15
  -2  -4  -2 14209.1 545.085  21
  -2   4  -2 14321.5 558.363   2
   2   4   2 15128.5 651.582  25
  -2   4  -2 13883.1 625.539  29
  -2  -4  -2 14363.1 535.480  24
  -2  -4  -2 14507.1 513.996  20
  -2   4  -3 2818.82 190.009  17
  -2   4  -3 2627.27 243.508   2
   2   4   3 2633.73 263.824   6
   2   4   3 2849.76 263.454  18
   2  -4   3 2771.65 274.124   3
   2  -4   3 2864.30 265.649  21
  -2  -4  -3 2977.74 244.048   4
   2   4   3 3250.96 259.124  29
   2   4   3 2674.33 274.370  25
  -2  -4  -3 2877.38 204.811   3
  -2   4  -3 2774.90 174.862  25
  -2  -4  -3 2881.88 226.696  24
  -2   4  -3 3088.57 266.054  15
   2   4   3 3060.36 213.698  13
  -2   4  -3 2574.14 241.178   6
   2  -4   3 2766.84 182.897  26
   2   4   3 2800.15 262.743   5
  -2  -4  -3 2925.33 262.713  12
  -2  -4  -3 3227.21 208.323  17
  -2  -4  -3 2968.13 219.548  20
  -2  -4  -3 3017.78 267.225   8
  -2  -4  -3 2940.67 231.811  28
  -2   4  -3 2700.58 244.159  18
   2  -4   3 3304.38 287.608  16
   2   4   3 2923.34 242.553  19
  -2  -4  -4 7383.89 364.022  20
  -2   4  -4 7198.30 421.254  15
   2  -4   4 7156.29 287.464  26
   2   4   4 7119.16 379.593  19
  -2   4  -4 7598.40 297.036  25
  -2   4  -4 6779.24 392.670   6
   2   4   4 6549.49 370.694  29
  -2  -4  -4 7061.23 410.287   4
   2   4   4 7172.39 326.700  13
  -2  -4  -4 7188.23 351.428  17
  -2  -4  -4 7106.40 420.021   8
   2   4   4 7233.84 432.641  18
   2  -4   4 6110.76 406.816  21
   2  -4   4 6913.82 273.518  22
  -2  -4  -4 6757.62 414.611  12
  -2   4  -4 7255.97 430.208   2
   2   4   4 7154.75 423.547   5
  -2   4  -4 6968.40 391.085  18
  -2  -4  -4 6766.75 367.837  24
   2  -4   4 6622.85 418.352  16
   2   4   4 6494.18 422.015   6
  -2  -4  -4 7171.32 320.261   3
   2  -4   4 7121.28 449.288   3
  -2   4  -4 7052.96 340.213  17
  -2   4  -5 144379. 2527.53  25
  -2  -4  -5 136150. 2869.66   4
  -2  -4  -5 135282. 2716.82  17
   2   4   5 140350. 2739.52  29
   2  -4   5 141437. 2463.41  26
  -2   4  -5 138103. 2775.24   6
  -2  -4  -5 135341. 2522.87   3
  -2  -4  -5 137155. 2695.98  20
  -2   4  -5 136022. 2739.61  18
   2   4   5 134015. 2829.57   5
   2  -4   5 137220. 2477.82  22
   2   4   5 131432. 2856.89  18
   2  -4   5 135668. 2894.94  21
   2   4   5 132544. 2693.61  19
  -2   4  -5 138862. 2918.58   2
  -2   4  -5 137042. 2694.84  17
  -2  -4  -5 133516. 2873.83  12
  -2  -4  -5 141624. 2867.62   8
   2  -4   5 134829. 2858.88  16
   2   4   5 134719. 2351.95   1
  -2  -4  -5 135388. 2739.41  24
   2   4   5 132001. 2871.48   6
   2   4   5 141096. 2571.33  13
  -2   4  -5 138310. 2870.29  15
  -2   4  -5 138872. 2693.08  11
   2  -4   5 137819. 2947.97   3
   2  -4   6 11735.8 349.279  26
  -2  -4  -6 11281.6 592.148   4
  -2   4  -6 11509.8 521.071  17
   2   4   6 11287.3 489.354  19
  -2  -4  -6 11746.3 598.662  12
  -2  -4  -6 12027.0 367.645   3
  -2  -4  -6 11411.9 528.109  24
   2  -4   6 11841.0 616.941   3
  -2   4  -6 11957.7 624.145   2
   2  -4   6 11947.5 388.973  22
  -2   4  -6 12113.6 594.304  15
   2  -4   6 11624.9 597.806  21
  -2   4  -6 12131.6 517.038  18
   2   4   6 11347.3 563.694   5
   2   4   6 11283.0 580.068  18
   2   4   6 11525.9 506.581  29
  -2  -4  -6 11620.6 534.498  17
  -2  -4  -6 11716.4 511.142  20
   2   4   6 12766.3 430.401  13
   2  -4   6 11595.7 576.977  16
   2   4   6 11766.7 347.937   1
  -2   4  -6 11288.5 581.795  27
  -2   4  -6 11507.4 475.720  11
  -2  -4  -6 11506.6 568.999   8
   2   4   6 10636.3 568.122   6
  -2   4  -7 119146. 2283.44   4
   2   4   7 112592. 2582.91   6
   2   4   7 113359. 2573.98  18
  -2  -4  -7 111758. 2462.42  24
   2  -4   7 114254. 2554.47  16
  -2  -4  -7 116404. 2517.02  17
  -2   4  -7 113249. 2484.06  17
   2   4   7 116351. 2397.06  29
   2  -4   7 121529. 2183.41  22
  -2   4  -7 115912. 2683.33   2
  -2  -4  -7 117876. 2672.63   4
   2   4   7 120027. 2206.81  13
   2   4   7 118900. 2152.35   1
   2  -4   7 112193. 2613.98  21
  -2  -4  -7 118254. 2446.89  20
   2   4   7 113063. 2362.83  19
  -2  -4  -7 114561. 2613.80  12
   2   4   7 111761. 2529.92   5
  -2   4  -7 114644. 2595.71  15
   2  -4   7 116328. 2063.49  26
  -2   4  -7 117091. 2333.56  11
   2  -4   7 113422. 2624.78   3
  -2  -4  -7 113698. 2554.26   8
  -2   4  -7 113269. 2573.85  27
  -2  -4  -7 114549. 2030.04   3
   2   4   8 7866.10 409.714  19
  -2  -4  -8 7572.83 484.607   8
  -2  -4  -8 6833.76 461.357  17
   2   4   8 7554.99 321.988  13
  -2  -4  -8 7131.49 445.224  24
   2   4   8 7155.76 469.715   5
  -2   4  -8 7045.57 485.011  15
   2   4   8 7726.23 498.139  18
  -2   4  -8 7225.92 462.450  17
   2   4   8 7038.20 393.462  29
  -2   4  -8 7627.48 386.239   4
  -2   4  -8 7295.12 481.121  27
   2   4   8 7746.27 331.207   1
  -2   4  -8 7664.09 540.155   2
   2  -4   8 7003.41 458.816  16
  -2  -4  -8 7047.98 427.938  20
  -2  -4  -8 7245.04 501.522  12
  -2  -4  -8 7902.65 539.024   4
   2  -4   8 7249.45 492.370   3
   2  -4   8 7943.03 328.288  22
   2   4   8 6873.85 473.347   6
   2  -4   8 7341.10 502.235  21
  -2   4  -8 7295.12 376.205  11
   2  -4   9 2300.97 284.819   3
  -2   4  -9 2394.76 215.953  11
   2   4   9 2375.12 193.681   1
  -2  -4  -9 3270.49 369.364   4
  -2   4  -9 2699.35 294.805  17
  -2   4  -9 2143.74 263.773  27
   2   4   9 2210.21 218.867  19
  -2   4  -9 2282.67 225.054   4
   2   4   9 2517.76 177.557  13
   2   4   9 2431.77 229.624  29
  -2  -4  -9 2756.76 322.522  12
   2   4   9 2610.39 296.955   5
  -2   4  -9 2481.39 301.330  15
   2  -4   9 2503.77 189.605  22
   2  -4   9 2189.57 265.272  16
  -2  -4  -9 2169.82 259.046  24
   2  -4   9 2552.10 310.941  21
  -2  -4  -9 3069.35 295.653  20
  -2   4  -9 2519.07 329.581   2
  -2  -4  -9 2542.49 291.374  17
   2   4   9 2552.25 294.637   6
  -2  -4  -9 2269.32 282.271   8
   2   4   9 2488.02 295.394  18
   2   4  10 21.8667 80.2537  19
  -2   4 -10-0.58485 58.7404  11
   2  -4  10-15.5490 105.638  21
   2   4  10 71.2029 99.7974  18
  -2  -4 -10 64.0161 142.478  12
  -2  -4 -10-99.7991 102.570  24
  -2   4 -10-96.7056 122.457  15
   2  -4  10-50.6599 115.006  16
  -2   4 -10 87.8508 106.494  17
  -2  -4 -10-43.5710 124.832  17
   2   4  10 74.8523 67.7034  29
  -2  -4 -10 40.4658 104.238  20
   2   4  10-24.6650 54.2716   1
   2  -4  10 32.1697 56.7214   7
   2   4  10 72.6552 94.3025   6
   2   4  10 47.6684 117.437   5
  -2   4 -10 72.1885 78.9565   4
  -2  -4 -10 88.9413 134.640   8
  -2   4 -10 64.0012 104.297  27
  -2   4 -10 132.846 135.782   2
   2  -4  10-69.5289 85.1407   3
  -2  -4 -10 118.250 124.801   4
  -2   4 -11 6223.03 560.498   2
  -2   4 -11 6362.95 473.042  27
  -2  -4 -11 5989.72 508.824  12
  -2  -4 -11 5880.51 474.365   8
  -2  -4 -11 6152.96 463.918  24
  -2  -4 -11 6592.44 566.188   4
   2  -4  11 5078.77 468.514  21
  -2   4 -11 6221.93 369.064  11
   2   4  11 6602.27 497.127   6
  -2  -4 -11 6826.81 485.463  20
  -2   4 -11 6132.37 421.371   4
   2   4  11 6297.72 385.782  29
   2  -4  11 6638.28 356.940   7
  -2   4 -11 5594.79 474.985  17
   2  -4  11 6812.58 498.558   3
   2  -4  11 6084.69 465.161  16
  -2  -4 -11 5264.56 474.163  17
   2   4  11 6117.31 473.787   5
   2   4  11 6907.13 506.082  18
  -2   4 -11 5640.44 480.540  15
   2   4  12 4330.89 404.634  14
  -2   4 -12 4651.24 456.504  17
  -2   4 -12 5347.15 442.647  27
  -2   4 -12 4268.29 437.111  15
  -2  -4 -12 5204.74 494.482  12
   2  -4  12 5317.52 448.760  16
  -2   4 -12 4767.45 392.341   4
  -2   4 -12 5338.91 533.616   2
  -2  -4 -12 4444.10 490.699   4
   2  -4  12 4592.01 458.520  21
  -2  -4 -12 4811.14 427.297  20
  -2  -4 -12 4363.91 412.464  24
  -2  -4 -12 4566.96 438.167   8
   2  -4  12 5700.26 462.019   3
  -2  -4 -12 4840.47 477.330  17
   2   4  12 4978.48 447.756  18
   2   4  12 4910.89 449.591   5
   2   4  12 4903.45 445.460   6
   2  -4  13 48401.5 1511.58   3
  -2  -4 -13 44842.8 1505.71  24
   2   4  13 46228.7 1543.47  18
  -2  -4 -13 46337.8 1629.00  12
  -2  -4 -13 43642.2 1536.81   8
  -2   4 -13 45809.4 1732.57   2
   2   4  13 47361.5 1559.11   6
  -2  -4 -13 43287.0 1699.07   4
  -2   4 -13 46207.1 1630.23  17
  -2   4 -13 43429.8 1567.46  15
  -2  -4 -13 48363.7 1553.70  20
   2  -4  13 42908.3 1577.49  21
   2  -4  13 47735.5 1551.38  16
   2   4  13 43349.4 1483.79  14
   2   4  13 45196.0 1532.12   5
  -2  -4 -13 46218.1 1659.23  17
  -2   4 -13 46794.1 1451.28   4
  -2   4 -13 46623.5 1501.98  27
  -2  -4 -14 2558.48 346.442  20
  -2  -4 -14 2416.31 355.620   8
   2  -4  14 2951.65 359.112  16
  -2  -4 -14 2918.29 413.635  17
   2   4  14 2791.62 366.739   5
  -2   4 -14 2978.68 444.191   2
   2  -4  14 2699.24 328.921   3
  -2  -4 -14 2562.79 371.485  12
  -2   4 -14 2601.58 381.044  15
  -2  -4 -14 3336.33 389.356  24
  -2   4 -14 2899.52 352.325  27
   2   4  14 2989.76 366.922  18
   2  -4  14 2430.26 358.292  21
   2   4  14 2612.54 349.521  14
  -2   4 -14 2898.33 394.932  17
  -2   4 -14 3019.41 349.011   4
   2   4  14 3031.72 371.504   6
  -2  -4 -14 3805.95 503.490   4
   2   4  15 11172.7 746.203  14
  -2   4 -15 12666.1 737.118  27
  -2  -4 -15 11554.5 843.212  17
  -2  -4 -15 11013.3 788.089  12
  -2   4 -15 11918.0 805.239  15
   2   4  15 11733.9 759.880   6
  -2  -4 -15 11753.9 889.856   4
  -2  -4 -15 9874.01 718.043   8
   2   4  15 12031.2 782.493   5
   2  -4  15 10716.4 774.213  21
   2   4  15 11495.5 747.472  18
  -2  -4 -15 12361.6 782.147  20
  -2  -4 -15 10987.2 728.454  24
   2  -4  15 11655.8 746.553  16
  -2   4 -15 12343.8 737.190   4
  -2   4 -15 11754.1 881.119   2
  -2   4 -15 10625.3 788.611  17
  -2   4 -16 156.016 138.843  15
  -2  -4 -16-32.7903 173.552  12
   2  -4  16 46.5494 161.415   1
  -2  -4 -16 132.363 133.736  20
  -2   4 -16 30.7168 105.425  27
  -2  -4 -16-12.1721 188.581   8
  -2  -4 -16-29.3364 159.172   4
   2  -4  16 88.7223 144.222  16
   2   4  16 71.5787 153.188   5
  -2  -4 -16 111.024 141.792  24
  -2  -4 -16 129.222 167.723  17
  -2   4 -16-55.3844 189.016  17
   2   4  16 163.126 125.458  18
   2  -4  16-46.2552 174.684  14
   2  -4  16-9.07388 170.824  21
   2   4  16 163.184 158.912  14
   2   4  16 119.374 140.592   6
  -2   4 -16-266.145 234.982   2
   2  -4  17 2345.03 413.289  14
  -2  -4 -17 3551.56 528.648   4
  -2  -4 -17 3021.20 433.709  20
  -2  -4 -17 3054.58 416.213  24
  -2  -4 -17 3900.58 532.226  17
   2   4  17 3823.74 455.870  18
   2  -4  17 2756.89 474.209   1
  -2   4 -17 3644.67 487.203  15
  -2   4 -17 3073.45 462.932  17
   2   4  17 3347.03 422.002   6
  -2  -4 -17 3387.44 461.896  12
   2   4  17 3180.97 433.940  14
   2  -4  17 3673.96 481.609  21
   2  -4  17 3774.46 456.932  16
  -2   4 -17 3509.26 538.837   2
   2   4  17 3295.50 447.223   5
  -2  -4 -18 1394.03 383.947   4
  -2  -4 -18 761.405 266.006  17
  -2  -4 -18 1272.42 320.424  12
   2  -4  18 1635.63 389.121  14
  -2  -4 -18 1260.72 298.736  24
   2   4  18 1294.41 311.154  14
  -2   4 -18 1298.09 321.174  15
  -2   4 -18 895.442 310.880  17
   2   4  18 1055.71 265.735   5
   2  -4  18 1489.27 376.277   1
   2   4  18 1636.44 313.308  23
   2  -4  18 1423.53 318.002  21
  -2  -4 -18 1316.79 307.030  20
  -2   4 -18 1139.46 314.697   2
   2  -4  19 6870.97 764.654   1
  -2  -4 -19 5715.14 633.113  12
   2   4  19 5819.41 627.551  14
  -2   4 -19 6143.60 667.021  15
  -2  -4 -19 7082.57 757.890  17
   2   4  19 6286.86 638.216   5
  -2  -4 -19 6464.89 748.795   4
  -2   4 -19 5503.46 659.910  17
   2  -4  19 5990.68 656.039  21
   2   4  19 5075.76 614.410  22
  -2  -4 -19 6844.30 651.962  24
   2  -4  19 6581.06 751.853  14
  -2   4 -20 3679.19 539.345  15
   2  -4  20 2933.99 530.771   1
   2   4  20 3114.52 488.526  22
   2   4  20 2771.03 469.892  14
  -2  -4 -20 3548.25 546.774  17
   2  -4  20 3465.02 560.242  14
  -2  -4 -20 3421.37 518.283  12
   2   4  20 4073.96 542.184   5
  -2   4 -20 3788.21 578.848  17
   2  -4  20 3288.65 510.438  21
   2  -4  21 8283.13 894.430  14
   2  -4  21 7221.29 828.388   1
  -2  -4 -21 8324.01 876.727  17
  -2   4 -21 7567.84 815.927  17
   2   4  21 6677.97 715.331  14
   2   4  21 7330.10 766.877  22
  -2   4 -21 7752.13 779.799  15
   2   4  21 7993.10 763.751   5
  -2  -4 -21 7113.71 742.741  12
   2  -4  21 8508.54 812.364  21
  -2  -4 -22 414.089 233.748  17
   2   4  22-0.47903 155.277  22
  -2   4 -22 319.611 227.336  17
   2   4  22-32.8419 160.011   5
   2  -4  22 93.8993 159.608   1
   2   4  22 659.919 254.328  14
  -2   6  23-217.663 182.106  23
  -2  -6  23-37.9181 208.228  21
  -2   6  23-66.7377 200.187   6
  -2  -6  22 1617.87 391.918  21
   2   6 -22 1039.61 295.281  17
  -2   6  22 1543.73 363.280   6
  -2  -6  22 1987.80 408.702  16
   2  -6 -22 1418.57 363.066  24
   2  -6 -22 1413.62 374.163  12
  -2   6  22 1314.25 367.640  22
  -2  -6  22 1255.85 401.498  14
   2  -6 -22 1967.05 457.463   4
  -2  -6  22 1242.97 401.496   1
   2   6 -22 1318.79 369.642  15
  -2   6  22 1671.90 384.453  23
  -2   6  22 1939.51 421.751   5
   2  -6 -21 430.324 263.265   4
  -2  -6  21 68.4508 211.998   1
   2   6 -21 301.029 190.393  27
  -2  -6  21 85.7827 181.214  21
   2   6 -21 576.646 253.090  15
  -2  -6  21 429.494 220.205  16
  -2   6  21 456.356 254.208  22
  -2   6  21 358.883 217.084  23
  -2   6  21 558.499 261.340   5
  -2  -6  21 259.824 226.885  14
  -2   6  21 145.365 182.565   6
   2  -6 -21-38.7935 218.777  17
   2  -6 -21 575.428 268.632  24
   2   6 -21 804.483 288.253  17
   2  -6 -21 389.171 218.663  12
  -2  -6  20 9612.88 833.795  16
   2   6 -20 9934.97 811.040  27
   2   6 -20 10178.4 829.406  17
   2   6 -20 8547.65 812.410  15
   2  -6 -20 9532.91 805.114  24
  -2   6  20 8844.53 799.294   6
   2  -6 -20 8295.67 836.390   4
   2  -6 -20 8326.69 811.653  12
  -2   6  20 9277.17 827.257   5
   2  -6 -20 9773.38 816.972  17
  -2  -6  20 9207.49 883.957   1
  -2  -6  20 8664.91 834.399  14
  -2   6  20 8961.38 829.209  23
  -2  -6  20 8687.48 816.494  21
  -2   6  20 8971.89 854.602  22
  -2   6  19 3974.93 527.475   5
  -2   6  19 3795.55 527.908  23
   2  -6 -19 3554.16 482.629  24
  -2  -6  19 3167.80 492.325  14
   2  -6 -19 3780.49 529.485  12
  -2  -6  19 4460.96 557.862  16
   2   6 -19 3653.29 495.797  27
   2   6 -19 3686.99 488.118  17
   2  -6 -19 4212.48 579.821   4
   2   6 -19 3279.56 512.456  15
  -2   6  19 4416.63 536.165  18
  -2   6  19 4328.67 545.744   6
   2  -6 -19 4174.53 519.496  17
  -2  -6  19 3395.73 540.165   1
  -2  -6  19 3345.61 504.697  21
  -2  -6  18 1505.25 343.175  14
   2   6 -18 1331.90 327.541  15
   2   6 -18 1942.16 348.953  17
  -2   6  18 1627.98 323.609   6
  -2  -6  18 1580.97 347.748  21
   2  -6 -18 1422.22 348.403  12
  -2  -6  18 1594.41 334.355  16
  -2  -6  18 1726.56 378.658   1
   2  -6 -18 1364.44 300.725  17
  -2   6  18 2250.99 400.452   5
   2   6 -18 1615.70 346.152  27
   2  -6 -18 1451.55 327.197   8
   2  -6 -18 1273.78 290.378  24
  -2  -6  18 1912.28 336.611   3
   2  -6 -18 1624.46 351.968   4
  -2   6  18 2075.31 384.540  18
   2  -6 -17 621.828 203.364  17
  -2   6  17 310.505 205.187   6
   2   6 -17 606.615 238.315  27
   2   6 -17 481.232 185.363  17
   2   6 -17 727.503 244.901  15
  -2  -6  17 589.701 267.253   1
   2  -6 -17 882.287 280.713   4
   2  -6 -17 808.376 262.177   8
   2  -6 -17 592.219 237.860  24
  -2  -6  17 250.132 191.537  21
  -2   6  17 671.419 230.314  18
  -2  -6  17 678.987 250.998  14
  -2   6  17 360.729 196.840   5
  -2  -6  17 459.114 201.935  16
  -2  -6  17 478.882 183.208   3
   2  -6 -17 955.095 311.578  12
  -2  -6  16 16503.0 950.603   3
  -2  -6  16 17636.8 1080.22   1
   2  -6 -16 17870.8 971.522  17
  -2  -6  16 16378.1 977.339  14
  -2   6  16 17120.7 1015.62   6
  -2   6  16 16389.7 991.390  18
   2  -6 -16 17067.5 1054.58  12
   2  -6 -16 15789.0 1012.79   4
   2   6 -16 18339.1 1038.40  27
  -2  -6  16 16852.4 1010.34  16
   2   6 -16 16158.2 1017.21  15
  -2   6  16 16209.3 983.705   5
   2  -6 -16 17188.2 969.285   8
  -2  -6  16 17273.7 1045.58  21
   2   6 -16 16202.1 914.480  17
   2  -6 -16 15901.3 945.245  24
   2  -6 -15 1414.82 279.388  17
   2  -6 -15 1469.07 289.937   8
   2  -6 -15 1609.30 331.926   4
  -2  -6  15 1533.24 317.150  14
  -2  -6  15 1955.90 362.672  21
  -2   6  15 1326.21 291.233  18
   2   6 -15 945.624 255.462  27
   2   6 -15 1186.88 252.626  17
  -2   6  15 1614.86 325.638   5
  -2  -6  15 1534.20 297.662   3
  -2  -6  15 1086.46 272.865   1
   2   6 -15 1775.00 342.243  15
  -2  -6  15 1835.66 340.777  16
   2  -6 -15 1703.45 317.883  24
   2  -6 -15 1476.73 342.575  12
  -2   6  15 1684.72 334.549   6
   2   6 -14 29453.4 1352.29  15
  -2   6  14 31073.5 1335.05   5
   2  -6 -14 31973.7 1373.32   4
  -2   6  14 31995.5 1208.96  19
   2   6 -14 33803.8 1390.26  27
  -2  -6  14 31873.5 1308.08  14
   2   6 -14 32165.4 1229.85  17
  -2  -6  14 31880.5 1371.53  16
  -2  -6  14 30492.9 1379.51   1
  -2   6  14 31974.2 1370.66   6
  -2  -6  14 32160.7 1403.07  21
  -2  -6  14 31066.0 1311.09   3
   2  -6 -14 29811.8 1272.69  24
  -2   6  14 31230.3 1354.51  18
   2  -6 -14 30991.4 1393.20  12
   2  -6 -14 33560.1 1264.39  17
   2  -6 -14 29116.3 1236.11   8
  -2  -6  13 3090.15 410.997  16
  -2  -6  13 2816.32 401.771  21
  -2   6  13 2486.26 355.475   6
   2  -6 -13 2552.67 342.875   8
   2  -6 -13 2722.09 320.759  17
   2   6 -13 2671.26 317.988  17
  -2   6  13 2488.14 376.737   5
   2   6 -13 2409.82 368.313  15
  -2  -6  13 2397.64 367.496   1
   2  -6 -13 3096.49 388.242  24
   2  -6 -13 2642.82 364.905   4
   2  -6 -13 2765.52 399.716  12
  -2  -6  13 2703.69 356.002  14
  -2   6  13 2515.90 314.660  19
  -2   6  13 3241.47 420.607  18
   2   6 -13 2944.97 395.330  27
  -2  -6  13 2166.94 335.815   3
  -2  -6  12 23094.7 1094.72  16
  -2  -6  12 20672.1 1062.93  21
  -2   6  12 21830.1 944.335  19
   2   6 -12 23253.4 1090.13  27
  -2  -6  12 20852.3 1042.27   1
  -2   6  12 21857.0 1050.46   5
   2   6 -12 22999.4 920.998  17
   2  -6 -12 21933.1 1024.50  24
  -2  -6  12 20759.3 958.935  14
   2   6 -12 19299.3 1029.42  15
   2  -6 -12 20508.5 1069.09  12
  -2  -6  12 21415.4 1037.68   3
  -2   6  12 21495.3 1067.43  18
   2  -6 -12 21108.7 973.486   8
   2  -6 -12 22126.7 1033.27   4
  -2   6  12 21783.5 1053.40   6
   2  -6 -12 22629.1 922.188  17
  -2  -6  11 192.832 125.352   1
   2  -6 -11 251.411 132.780   4
  -2  -6  11 178.287 101.317  22
  -2   6  11 282.664 173.531   6
  -2  -6  11 405.626 185.224  16
  -2   6  11 316.119 116.161  29
  -2  -6  11 76.0044 124.999  14
  -2  -6  11 249.334 117.562   3
   2   6 -11 364.038 118.294  17
   2  -6 -11 117.920 113.821   8
  -2   6  11 71.1783 100.866  19
  -2   6  11 34.1113 137.564   5
   2   6 -11 69.0771 76.5574  25
   2   6 -11 162.665 131.526  27
   2   6 -11 225.138 171.603  15
   2  -6 -11 99.8642 89.9680  17
   2  -6 -11-109.527 183.210  12
   2   6 -11 99.0521 149.296   2
   2  -6 -11-1.43859 145.758  24
  -2   6  11 283.391 164.037  18
  -2  -6  11 168.690 180.761  21
   2  -6 -10 1180.55 192.320  17
  -2  -6  10 1033.50 235.936  16
   2  -6 -10 1061.06 217.171   8
  -2   6  10 1060.18 168.797  29
   2  -6 -10 1228.97 265.132  12
   2   6 -10 929.874 180.838  25
  -2  -6  10 1033.34 200.117  14
  -2   6  10 1108.10 226.995   5
  -2  -6  10 894.247 237.063  21
   2   6 -10 1135.32 180.835  17
   2   6 -10 1381.81 187.905  18
  -2  -6  10 683.789 191.475   3
  -2   6  10 1042.01 247.027  18
   2   6 -10 1448.07 275.556  27
   2  -6 -10 835.775 194.019   4
   2   6 -10 883.819 237.124  15
   2  -6 -10 805.507 204.787  24
  -2   6  10 966.460 216.721   6
  -2  -6  10 1240.22 184.232  22
  -2  -6  10 990.008 214.602   1
  -2   6  10 1493.93 245.898  19
   2   6 -10 1125.76 216.548   2
  -2  -6   9 2304.08 305.676   1
  -2   6   9 2632.78 273.555  29
  -2   6   9 2319.83 289.374  19
   2   6  -9 2424.98 265.698  25
   2  -6  -9 2643.33 244.940   3
  -2  -6   9 2343.71 265.823  14
  -2   6   9 2141.81 316.044   6
   2   6  -9 2561.78 244.400  17
  -2  -6   9 1861.85 293.070   3
   2   6  -9 2180.13 327.014  29
   2   6  -9 2687.88 246.653   9
  -2   6   9 2289.09 330.182  18
  -2   6   9 2219.65 333.151   5
   2   6  -9 1965.28 305.070  27
   2  -6  -9 2051.65 278.217   8
   2  -6  -9 1793.34 309.257  12
   2   6  -9 1947.24 312.709  15
   2   6  -9 1758.43 273.272   2
  -2  -6   9 2224.26 318.443  16
  -2  -6   9 2374.26 343.543  21
   2  -6  -9 2404.59 314.926  24
   2  -6  -9 2069.72 270.557   4
  -2  -6   9 2394.82 254.926  22
   2   6  -9 2710.24 269.236  18
   2  -6  -9 2318.74 233.906  17
   2   6  -8 76536.1 1677.67  17
  -2  -6   8 73857.1 1951.60   1
  -2   6   8 73744.2 2067.00   6
  -2   6   8 74549.3 1958.77  19
  -2  -6   8 76859.0 1797.48  22
   2  -6  -8 70096.8 1889.60   8
  -2  -6   8 76333.4 2112.67  16
   2   6  -8 71223.9 1925.96   2
  -2   6   8 72337.0 1858.76  29
   2   6  -8 78336.5 1785.44   9
   2  -6  -8 78465.6 1800.89   3
   2   6  -8 69148.2 2059.63  15
  -2  -6   8 73770.5 1795.04  14
  -2  -6   8 72845.7 2091.14  21
   2   6  -8 74326.5 1820.89  25
   2   6  -8 75926.1 1851.28  18
  -2   6   8 71634.9 2040.12   5
   2  -6  -8 71535.9 1981.13  24
   2  -6  -8 71870.9 1857.54   4
   2   6  -8 75287.9 2094.44  27
   2   6  -8 78501.6 2156.80  29
   2   6  -8 71473.8 1996.33   6
  -2  -6   8 72101.6 2047.91   3
   2  -6  -8 71840.2 2106.49  12
   2  -6  -8 77467.9 1687.79  17
  -2   6   8 75507.8 2119.48  18
   2   6  -7 3353.97 384.785  29
   2   6  -7 3459.90 297.197   9
  -2  -6   7 3440.41 331.726   1
   2  -6  -7 3472.13 302.077   4
   2   6  -7 3227.40 296.712  25
   2   6  -7 2959.58 364.933  15
   2  -6  -7 3322.50 294.149   3
   2   6  -7 3024.74 306.149   2
  -2  -6   7 3161.90 370.400  21
  -2  -6   7 4631.91 429.675   3
   2   6  -7 3263.25 371.494  27
  -2  -6   7 3147.08 370.769  16
   2  -6  -7 3404.41 351.635  24
  -2   6   7 3359.40 319.628  29
  -2  -6   7 3533.39 296.615  22
  -2   6   7 3059.46 329.492  19
  -2  -6   7 3308.64 273.447  14
   2   6  -7 3181.04 225.756  17
   2   6  -7 3453.76 361.753   6
   2   6  -7 3028.78 302.382  18
  -2   6   7 4148.27 408.672   6
   2  -6  -7 3354.94 386.884  12
   2  -6  -7 3063.13 317.712   8
  -2   6   7 3221.65 374.551  18
   2  -6  -7 3553.96 239.393  17
   2   6  -6 17453.1 724.350   2
  -2   6   6 16590.6 848.946  18
   2  -6  -6 16920.2 668.695   4
  -2  -6   6 17552.6 735.531   1
   2  -6  -6 16644.8 739.207   8
   2   6  -6 17343.9 863.676  29
  -2  -6   6 17376.5 842.513   3
   2  -6  -6 18526.2 562.340  10
   2  -6  -6 17072.7 664.026  21
   2   6  -6 17073.4 846.467  27
   2   6  -6 18367.4 853.554   6
   2  -6  -6 16881.9 861.319  12
   2  -6  -6 18180.4 539.393  17
   2  -6  -6 16673.4 798.774  24
   2   6  -6 17466.9 718.474  25
   2  -6  -6 19699.0 875.296  28
  -2  -6   6 17997.6 711.366  22
  -2   6   6 16925.9 835.167   6
  -2  -6   6 17119.2 852.517  21
  -2   6   6 18012.9 814.796  19
   2  -6  -6 17648.1 728.574   3
   2   6  -6 17117.3 765.650  18
   2   6  -6 17642.8 530.256  17
  -2  -6   6 18130.9 876.800  16
  -2  -6   6 18771.8 642.614  14
  -2   6   6 18538.8 788.346  29
   2   6  -5 37610.1 1298.15   6
   2  -6  -5 39091.1 1318.10  28
  -2   6   5 41512.5 1387.28  18
   2  -6  -5 35411.4 1240.58  24
   2  -6  -5 38719.4 1188.80   3
   2  -6  -5 37399.5 1184.62   8
   2   6  -5 39746.9 1261.11  18
  -2  -6   5 39461.6 1366.12  16
   2   6  -5 37671.4 1159.86  25
   2  -6  -5 40354.1 888.351  20
   2   6  -5 38080.5 834.974  17
  -2   6   5 36748.2 1217.80  29
  -2   6   5 36983.1 1258.32  19
   2   6  -5 39049.5 1350.79  29
  -2   6   5 37546.3 1237.65  25
   2  -6  -5 39270.4 840.468  17
   2  -6  -5 42576.2 998.509  10
  -2  -6   5 40731.9 990.165  14
   2  -6  -5 38340.0 1355.25  12
  -2   6   5 37353.5 1305.24   6
  -2  -6   5 37608.1 1320.55  21
  -2  -6   5 39305.1 1321.71   3
   2  -6  -5 37451.4 1113.96  21
   2  -6  -5 38880.8 1053.01   4
  -2  -6   5 39956.4 1144.90   1
   2   6  -4 6006.17 444.203  18
   2  -6  -4 5933.00 327.446  10
   2  -6  -4 6354.14 326.547   4
  -2  -6   4 5555.99 477.178  16
   2   6  -4 5470.57 394.590  25
   2  -6  -4 5641.99 453.428  28
  -2   6   4 5604.11 419.686  25
  -2  -6   4 6095.38 366.673   1
  -2   6   4 5420.25 464.078  18
  -2  -6   4 6214.83 472.362   3
  -2   6   4 5912.15 435.778  29
   2  -6  -4 6070.84 422.913   3
   2  -6  -4 5929.10 484.688  12
   2  -6  -4 5425.18 397.692   8
  -2   6   4 5970.11 455.203  19
   2  -6  -4 6448.59 468.329  24
   2  -6  -4 5350.92 378.935  21
  -2   6   4 5933.65 469.556   6
   2   6  -4 6267.63 483.060   6
  -2  -6   4 5038.70 439.604  21
   2   6  -4 5852.53 473.344  29
   2  -6  -4 5827.36 265.242  20
   2  -6  -3 3194.00 299.354  21
   2  -6  -3 2941.05 198.210  20
   2  -6  -3 3965.22 277.744  10
   2  -6  -3 3168.58 307.026   3
  -2   6   3 2951.94 335.915   6
  -2  -6   3 3429.25 351.900  21
   2  -6  -3 3387.53 356.328  28
   2  -6  -3 3956.90 402.492  12
  -2   6   3 2971.89 294.634  25
   2   6  -3 3362.94 354.125   6
  -2   6   3 3269.91 361.340  18
  -2  -6   3 3347.73 337.715   3
  -2  -6   3 3167.06 351.600  16
   2   6  -3 3317.84 332.678  18
  -2   6   3 3033.85 322.472  29
   2   6  -3 3340.53 354.661  29
  -2   6   3 2956.86 325.845  19
   2   6  -3 3285.54 307.984  25
  -2  -6   3 3283.36 247.382   1
   2  -6  -3 2953.28 293.090   8
  -2   6   3 3155.56 164.925   2
   2  -6  -3 3190.74 203.200   4
   2   6  -2 56330.5 1583.89  18
   2  -6  -2 53297.4 1527.12   3
  -2   6   2 55243.8 1586.75  29
  -2  -6   2 55989.9 1579.75   3
   2  -6  -2 54231.3 1501.45   8
  -2  -6   2 53425.9 1500.35  12
  -2   6   2 54348.7 1635.96  18
   2  -6  -2 55789.9 1500.43  21
  -2   6   2 54129.5 1465.36  25
   2  -6  -2 53624.6 1377.14  10
  -2  -6   2 52106.9 1644.53  16
  -2  -6   2 55582.5 1590.05  21
  -2   6   2 57038.4 1645.16   6
   2  -6  -2 54252.6 1643.33  28
   2   6  -2 53996.5 1615.44   6
   2   6  -2 54720.5 1509.18  25
  -2  -6   2 54989.7 1255.28   1
  -2   6   2 52153.4 1587.99  19
  -2   6   2 55392.1 1161.14   2
   2   6  -2 56988.7 1647.40  29
  -2   6   1 14728.3 755.903  18
  -2   6   1 15704.5 776.210   6
   2   6  -1 15545.1 775.500   6
   2   6  -1 15625.7 769.958  29
   2   6  -1 15957.4 712.119  13
  -2   6   1 15628.5 519.713   2
   2  -6  -1 15460.9 649.418  10
  -2  -6   1 15901.1 487.973   1
  -2  -6   1 15727.0 714.813  12
   2  -6  -1 17044.2 835.319  16
   2  -6  -1 14990.5 694.134  21
  -2   6   1 15870.4 666.019  25
  -2  -6   1 16071.0 737.444   3
   2  -6  -1 15190.9 727.097   3
   2   6  -1 16067.2 726.127  25
   2   6  -1 15991.5 757.078  18
  -2  -6   1 14757.3 718.324  21
  -2   6   1 15046.9 762.831  19
  -2   6   1 14895.2 744.942  29
  -2  -6   1 15836.9 802.955  16
  -2  -6   0 149888. 3171.41   3
   2   6   0 149316. 3269.87  29
  -2   6   0 148832. 3277.53   6
   2   6   0 146063. 3252.72  18
  -2  -6   0 151750. 3196.94  12
   2  -6   0 147419. 3180.96  21
   2   6   0 150646. 3122.06  13
   2  -6   0 155045. 3377.85  16
   2   6   0 148612. 3316.97   6
   2  -6   0 152995. 3097.94  10
  -2  -6   0 142301. 3063.98  24
  -2   6   0 149972. 3319.09  19
   2   6   0 150287. 3220.90  25
  -2  -6   0 149601. 3266.53   8
  -2   6   0 150197. 2866.51   2
  -2   6   0 154354. 3032.80  25
  -2  -6   0 149268. 3209.23  28
   2  -6   0 149135. 3241.42   3
  -2  -6   0 151780. 3383.54  16
  -2  -6   0 142498. 3168.63  21
  -2   6   0 147623. 3279.29  29
  -2  -6   0 150875. 2624.91   1
  -2   6   0 152261. 3323.79  18
   2   6   1 12597.4 653.544  19
   2  -6   1 13064.4 719.879  16
  -2   6  -1 13483.5 718.981  29
  -2  -6  -1 12226.4 718.585  16
  -2  -6  -1 13164.5 631.369   3
  -2  -6  -1 14038.3 470.722  10
  -2   6  -1 12920.0 707.002  19
   2   6   1 12953.9 604.986  13
   2   6   1 13693.6 699.284  25
  -2   6  -1 12522.6 550.932  25
   2  -6   1 13155.5 695.926   3
  -2  -6  -1 12794.8 679.316   8
   2   6   1 13327.7 704.407  18
   2   6   1 12185.0 661.190  29
  -2   6  -1 12433.8 678.933   6
  -2   6  -1 12722.6 529.885   2
   2   6   1 13668.1 731.627   6
  -2  -6  -1 12752.8 646.289  28
  -2   6  -1 12863.5 690.671  18
  -2  -6  -1 12224.6 550.897  20
  -2  -6  -1 12969.7 663.707  12
   2  -6   1 13185.4 670.709  21
  -2  -6  -1 12744.7 643.507  21
  -2  -6  -1 13000.2 614.351  24
  -2   6  -2 2451.45 297.170   6
   2   6   2 2870.69 319.320  25
   2   6   2 3309.45 328.879  29
  -2   6  -2 2671.54 309.224  18
   2  -6   2 2739.55 327.009  16
  -2  -6  -2 2704.31 279.483  24
  -2   6  -2 2604.15 320.822  29
  -2   6  -2 2424.20 238.879   2
  -2  -6  -2 3137.73 296.282   3
  -2  -6  -2 2761.06 312.694  12
   2   6   2 3114.08 279.444  13
   2   6   2 3398.01 335.229  19
  -2  -6  -2 3085.59 299.273  21
  -2   6  -2 2524.05 291.600  15
  -2  -6  -2 2974.68 171.426  10
   2   6   2 2995.31 338.525  18
   2  -6   2 2555.73 308.106   3
   2  -6   2 2695.18 306.722  21
  -2   6  -2 3293.79 260.544  25
  -2  -6  -2 2652.13 244.250  20
   2   6   2 2662.24 324.202   6
  -2  -6  -2 3282.88 317.892  28
  -2  -6  -2 2219.35 280.512   8
  -2   6  -3 36.0441 85.8696  18
  -2  -6  -3-75.3182 144.016   8
  -2   6  -3-40.5318 88.9968  15
  -2  -6  -3-14.8669 80.9179  24
  -2  -6  -3 12.9317 57.8115  20
   2  -6   3-64.8741 111.568   3
  -2  -6  -3 44.0758 89.1029  28
  -2   6  -3 199.673 78.0103  25
   2   6   3 97.7761 105.752  18
  -2   6  -3-35.1705 111.661  29
  -2   6  -3 221.871 117.841   6
   2  -6   3 109.026 127.272  21
   2   6   3-3.83988 104.305  25
  -2  -6  -3 27.6854 75.0549   3
   2   6   3 16.9773 83.4956  19
  -2  -6  -3-29.0933 109.833  12
   2   6   3-118.528 91.2164  29
  -2   6  -3 18.3635 79.0568   2
   2   6   3-41.8685 68.4793  13
  -2  -6  -3-50.0468 103.311  21
   2  -6   3-49.5343 109.456  16
   2   6   3-69.1989 134.600   6
  -2  -6  -4 19997.2 899.763  12
   2  -6   4 19277.6 904.540  16
   2   6   4 20514.3 863.281  29
   2   6   4 20680.7 927.819  18
   2   6   4 19331.7 911.619  25
  -2  -6  -4 20493.8 721.180  20
  -2  -6  -4 18821.2 793.684  24
   2   6   4 18720.7 803.569  19
  -2   6  -4 20142.9 874.708  18
  -2  -6  -4 25536.7 968.732   8
  -2  -6  -4 20137.8 758.133   3
   2   6   4 21080.3 746.326  13
  -2   6  -4 19833.3 803.319   2
  -2  -6  -4 20394.9 833.027  28
  -2   6  -4 22731.1 708.128  25
   2   6   4 19476.7 917.662   6
   2  -6   4 20697.5 909.073  21
  -2   6  -4 18339.1 848.104  15
   2  -6   4 19298.0 911.907   3
  -2   6  -4 21728.7 905.017   6
  -2  -6  -5 9320.61 467.917  20
   2   6   5 8434.10 596.900  25
   2   6   5 8955.22 528.738  19
  -2   6  -5 8647.58 577.367  15
   2  -6   5 7537.59 570.658   3
  -2  -6  -5 8434.18 582.542  12
   2   6   5 9039.60 608.390   6
  -2   6  -5 8023.96 516.944   2
   2   6   5 9349.84 457.296  13
  -2  -6  -5 8818.20 572.242   8
  -2  -6  -5 8799.67 524.215  24
   2  -6   5 8739.72 593.141  21
   2  -6   5 8597.71 589.797  16
  -2  -6  -5 9773.85 424.489  17
  -2   6  -5 9169.64 404.488  17
   2   6   5 9082.74 550.842  29
  -2   6  -5 10047.4 436.782  25
  -2   6  -5 9322.46 565.473  18
  -2   6  -5 9305.71 581.506   6
  -2  -6  -5 9239.48 468.704   3
   2   6   5 8941.93 603.996  18
  -2   6  -6 97621.8 2064.23  17
  -2   6  -6 90188.3 2396.55  15
  -2  -6  -6 104204. 2104.47   3
  -2  -6  -6 96575.7 2132.96  20
   2  -6   6 94264.7 2461.34  21
  -2  -6  -6 90882.0 2363.75   8
   2   6   6 93797.0 2491.72  25
  -2   6  -6 92678.4 2340.96   2
   2  -6   6 92547.2 2452.83  16
  -2   6  -6 99891.4 2347.76  18
  -2   6  -6 96193.2 2369.83   6
  -2  -6  -6 100056. 2095.40  17
  -2  -6  -6 91154.4 2268.62  24
   2   6   6 94019.2 2261.43  19
   2   6   6 101322. 2080.21  13
   2   6   6 96431.1 2487.08  18
   2   6   6 96407.2 2313.01  29
   2   6   6 95464.8 2466.81   6
   2  -6   6 95093.2 2505.27   3
  -2  -6  -6 96944.1 2470.53  12
  -2   6  -6 101596. 2035.85  25
  -2  -6  -7 728.455 178.848  24
  -2  -6  -7 1182.71 215.096   8
   2   6   7 1011.58 240.123  25
  -2   6  -7 738.057 200.686  15
  -2   6  -7 728.134 177.893   2
   2   6   7 895.127 211.799   6
   2  -6   7 609.159 212.950  21
   2  -6   7 831.137 212.826   3
  -2   6  -7 771.633 192.452   6
  -2  -6  -7 878.021 228.972  12
   2   6   7 1129.94 207.207  29
   2   6   7 1202.12 258.235  18
  -2   6  -7 1108.12 161.985  17
   2   6   7 1058.77 191.099  19
  -2   6  -7 752.998 214.770  27
  -2   6  -7 933.601 171.825  11
  -2  -6  -7 1229.56 180.014  17
   2   6   7 796.387 211.286   5
  -2  -6  -7 1129.88 225.469   4
  -2  -6  -7 932.689 167.326  20
  -2   6  -7 877.781 184.773  18
   2  -6   7 720.718 191.634  16
  -2   6  -8 27120.0 1151.76  15
  -2   6  -8 28321.6 1022.10  18
   2  -6   8 28621.5 1204.21   3
   2   6   8 27346.2 1202.82  25
  -2  -6  -8 28212.6 1109.87   4
   2   6   8 28258.6 1161.60   5
   2  -6   8 28382.3 1170.40  16
  -2  -6  -8 27899.6 1065.96  24
  -2  -6  -8 30913.3 1003.89  17
  -2   6  -8 27771.4 1142.25   2
   2   6   8 26320.3 1143.88  18
   2   6   8 29171.5 1043.26  29
  -2   6  -8 27655.8 1176.36  27
   2   6   8 27826.0 1008.03  19
  -2  -6  -8 28149.5 1187.51  12
   2   6   8 26357.2 1133.86   6
   2  -6   8 25966.9 1150.03  21
  -2   6  -8 28915.5 969.740  17
  -2  -6  -8 29306.3 971.667  20
  -2  -6  -8 27092.3 1118.32   8
  -2   6  -8 26956.5 945.111  11
  -2  -6  -9 866.109 209.215   4
  -2  -6  -9 883.519 240.242  12
  -2   6  -9 1061.30 239.094  15
  -2   6  -9 921.227 240.635  27
   2  -6   9 1462.43 286.521  21
   2   6   9 1150.87 241.786   6
   2   6   9 1424.06 277.525   5
   2   6   9 1046.89 269.175  25
  -2  -6  -9 977.364 190.032  17
  -2   6  -9 1552.95 223.764  17
   2   6   9 1223.62 254.744  18
  -2  -6  -9 1118.38 192.006  20
   2  -6   9 1157.29 250.637   3
  -2   6  -9 963.723 165.942  11
  -2  -6  -9 1546.40 275.059   8
  -2  -6  -9 1356.08 242.377  24
  -2   6  -9 1612.12 277.682   2
   2   6   9 1713.77 241.760  29
   2  -6   9 1236.31 243.631  16
   2   6   9 757.566 158.909  19
   2   6  10 115.960 124.280   6
  -2  -6 -10 208.123 96.2737  20
  -2   6 -10 427.051 151.659  17
   2  -6  10 38.5545 159.264  21
  -2   6 -10 257.111 162.927  15
  -2   6 -10 344.049 176.760   2
   2   6  10 155.628 146.968  18
  -2   6 -10 377.556 195.721  27
  -2  -6 -10 32.3825 115.877  24
  -2  -6 -10 187.930 104.860  17
   2  -6  10 44.6818 115.685  16
   2  -6  10 134.320 139.032   3
   2   6  10 31.0453 138.649   5
  -2  -6 -10 306.570 169.984   8
   2   6  10 161.190 98.3677  29
  -2  -6 -10 125.185 141.375   4
  -2  -6 -10 129.390 155.662  12
  -2   6 -11 2647.17 317.740  17
  -2  -6 -11 2329.56 353.991   4
  -2  -6 -11 2155.62 332.957   8
  -2   6 -11 2214.51 355.266  15
  -2   6 -11 2744.30 400.676   2
   2  -6  11 2690.67 366.034   3
  -2   6 -11 2804.42 370.241  27
   2  -6  11 2482.18 359.369  16
  -2  -6 -11 1850.25 335.503  12
  -2  -6 -11 2655.95 328.804  17
   2   6  11 2599.91 374.405   6
   2   6  11 2173.64 341.275   5
  -2  -6 -11 2191.37 320.375  24
   2   6  11 2614.78 363.255  18
   2  -6  11 2799.23 397.923  21
  -2   6 -12 14708.0 941.566   2
  -2  -6 -12 13996.9 894.002   4
  -2  -6 -12 14858.1 882.341   8
  -2   6 -12 13927.7 896.154  15
   2  -6  12 17046.3 942.626  16
   2   6  12 15051.9 902.063   6
   2   6  12 15985.6 931.568  18
   2   6  12 16000.9 912.102   5
  -2  -6 -12 15201.4 847.364  24
  -2   6 -12 16545.4 935.146  27
   2  -6  12 15578.7 916.877   3
  -2  -6 -12 15366.9 948.778  12
  -2  -6 -12 16882.7 872.437  17
   2  -6  12 16149.2 959.884  21
  -2   6 -12 16350.5 846.081  17
   2  -6  13 6734.53 601.070   3
   2  -6  13 7339.53 625.788  16
  -2  -6 -13 6535.56 623.035  12
  -2  -6 -13 6423.47 585.373   8
   2  -6  13 5826.02 556.203  14
   2   6  13 6278.47 584.172   5
  -2   6 -13 6861.99 604.335  27
   2   6  13 5947.44 571.519   6
  -2  -6 -13 6873.06 576.409  17
  -2  -6 -13 6118.39 546.632  24
   2   6  13 5863.88 574.632  18
  -2  -6 -13 6642.83 638.656   4
  -2   6 -13 6045.49 624.595   2
  -2   6 -13 6314.72 541.850  17
  -2   6 -13 5399.38 576.970  15
   2  -6  13 5728.71 584.710  21
  -2   6 -14 14868.3 1015.36   2
   2  -6  14 15365.7 929.612   3
   2  -6  14 15550.7 957.628  14
   2   6  14 15374.0 951.765   6
   2   6  14 15290.4 962.249  18
  -2   6 -14 14700.7 884.803  17
   2  -6  14 14587.8 975.557  21
   2   6  14 15596.4 952.320   5
  -2  -6 -14 16384.4 1025.62  12
  -2  -6 -14 16998.6 1053.29   4
  -2  -6 -14 17545.2 969.786  17
  -2  -6 -14 15185.3 905.127  24
  -2   6 -14 14934.3 973.526  15
  -2   6 -14 16434.6 959.497  27
   2  -6  14 18118.5 1017.68  16
  -2  -6 -14 14138.0 910.192   8
  -2   6 -15 1836.63 378.757  15
   2  -6  15 2086.88 355.902  16
  -2  -6 -15 1254.05 299.509   8
   2   6  15 2081.15 379.642   5
  -2  -6 -15 1304.57 328.471   4
  -2   6 -15 1920.59 338.291  17
  -2  -6 -15 2103.57 390.030  12
  -2   6 -15 1498.07 342.647   2
  -2  -6 -15 1792.26 334.001  17
   2   6  15 1561.95 323.318   6
   2  -6  15 1619.81 373.924   1
   2  -6  15 1705.07 338.619  14
  -2  -6 -15 1915.09 348.923  24
   2  -6  15 2008.97 343.279   3
   2  -6  15 1219.95 304.586  21
  -2   6 -15 1955.89 345.657  27
   2   6  15 1995.89 370.181  18
  -2   6 -16 747.923 230.518  17
   2   6  16 1023.26 272.048   6
  -2   6 -16 696.518 252.910  27
   2  -6  16 763.657 248.129  14
  -2  -6 -16 644.120 272.179  12
  -2  -6 -16 507.781 203.199  17
  -2  -6 -16 217.878 170.258   8
   2  -6  16 777.021 274.870  21
  -2   6 -16 510.687 260.068   2
  -2  -6 -16 906.523 280.681  24
   2   6  16 686.842 249.842  18
   2   6  16 579.904 232.987   5
   2  -6  16 420.810 247.016   1
  -2   6 -16 622.594 241.903  15
   2  -6  16 548.324 214.146  16
   2   6  17 1717.52 350.511   6
  -2  -6 -17 1065.63 282.651  17
  -2   6 -17 1357.80 291.829  17
   2   6  17 1772.46 356.604  18
  -2  -6 -17 1124.52 288.585  24
  -2   6 -17 1291.21 352.400   2
  -2   6 -17 708.133 264.090  15
   2  -6  17 1617.30 369.982  21
  -2  -6 -17 936.091 283.743   8
   2  -6  17 1588.18 387.211   1
   2  -6  17 1311.47 342.575  14
  -2  -6 -17 1552.16 363.691  12
   2   6  17 1232.83 316.412   5
   2   6  18 4032.33 597.974  25
  -2  -6 -18 3497.23 508.878   8
   2  -6  18 4965.81 619.702  21
  -2   6 -18 4711.40 574.531  17
  -2   6 -18 3937.53 555.575  15
   2   6  18 3328.66 490.115   5
  -2  -6 -18 4439.51 599.850  12
   2   6  18 5445.93 614.626  18
   2  -6  18 3841.94 588.998   1
  -2  -6 -18 4385.77 551.358  24
  -2  -6 -18 4089.12 547.631  17
   2  -6  18 4066.66 573.680  14
   2  -6  19 117.122 233.927   1
   2   6  19 580.534 257.770  23
   2   6  19 193.844 189.126   5
  -2   6 -19 597.105 271.837  15
  -2   6 -19 130.482 182.164  17
  -2  -6 -19 378.216 215.660  24
   2  -6  19 55.0879 197.344  14
   2   6  19-124.427 185.364  25
  -2  -6 -19 221.976 207.272  17
   2  -6  19 19.1656 198.596  21
  -2  -6 -19 557.041 274.529  12
  -2  -6 -20 7589.68 801.543  12
  -2  -6 -20 9157.62 817.426  24
   2  -6  20 7038.22 791.953  14
  -2   6 -20 6513.13 752.954  15
   2  -6  20 7778.83 857.067   1
   2   6  20 7837.43 855.010  25
   2   6  20 9117.99 838.526   5
   2  -6  20 8136.12 831.812  21
   2  -6  21-8.62317 173.105  21
  -2   8  21 382.692 223.273   6
  -2  -8  21 956.059 319.317  16
   2   8 -21 907.108 325.044  27
  -2  -8  21 435.381 297.138  21
  -2  -8  20 4808.52 650.334   1
   2   8 -20 7141.27 776.133  27
   2   8 -20 4860.31 679.388  15
   2  -8 -20 6065.03 699.969  24
  -2   8  20 6063.44 737.134  25
   2  -8 -20 4822.32 686.884  12
  -2  -8  20 5458.01 690.334  21
  -2  -8  20 6274.39 728.953  16
  -2   8  20 7057.49 789.417   5
   2  -8 -20 5076.35 630.222   8
  -2   8  20 7002.11 756.207   6
  -2   8  20 6727.66 775.112  23
  -2   8  19 31.9542 183.578  18
   2  -8 -19 119.772 177.001   4
  -2   8  19 28.9806 172.237   6
  -2  -8  19 25.4871 170.626   1
   2   8 -19-42.8803 178.614  27
  -2  -8  19 230.348 195.938  21
  -2   8  19 163.765 217.838  23
  -2  -8  19 45.1195 132.284   3
  -2   8  19 412.370 291.787  25
  -2  -8  19-22.5302 194.391  16
  -2   8  19 146.118 223.017   5
   2  -8 -19 483.760 253.521  24
   2  -8 -19 101.826 181.590   8
   2  -8 -19 17.5377 196.485  12
   2   8 -19-47.4754 210.989  15
  -2  -8  18 1457.15 344.703   3
   2  -8 -18 1289.11 321.454   8
  -2   8  18 1080.69 328.474   6
  -2  -8  18 966.618 331.017  21
   2   8 -18 498.622 277.578  15
  -2  -8  18 1351.16 362.887  16
  -2   8  18 1691.83 374.869  18
  -2  -8  18 1067.29 313.067   1
   2  -8 -18 1182.49 311.095   4
   2  -8 -18 1190.92 319.529  24
   2   8 -18 823.094 304.201  27
   2  -8 -18 1678.64 419.667  12
  -2   8  18 2162.06 428.692   5
  -2  -8  17 244.710 230.168  16
   2  -8 -17 254.358 173.179   4
   2  -8 -17 173.266 203.234  12
  -2   8  17 36.7775 204.538   5
  -2   8  17 194.828 212.792  18
  -2  -8  17-157.255 229.371   1
  -2   8  17 306.935 232.609   6
   2  -8 -17 37.9440 160.271   8
  -2  -8  17 266.188 217.612  21
  -2  -8  17 119.022 152.490   3
   2   8 -17 88.3746 173.441  27
   2  -8 -17 120.229 173.167  24
   2   8 -17 307.564 231.526  15
   2  -8 -16 2013.49 429.106  12
   2  -8 -16 1921.31 374.431   8
  -2   8  16 1696.07 382.460   5
   2  -8 -16 1529.18 334.701   4
  -2  -8  16 1653.82 360.102   3
  -2   8  16 1634.26 343.012  18
   2  -8 -16 1722.18 367.936  24
   2   8 -16 1393.53 347.687  27
  -2   8  16 1609.06 356.842   6
  -2  -8  16 1608.83 358.480  16
  -2  -8  16 1593.26 363.930   1
  -2  -8  16 1291.55 349.176  21
   2   8 -16 1415.94 359.701  15
  -2   8  15 5807.01 638.720   5
   2  -8 -15 3660.74 473.802   8
  -2  -8  15 5220.28 616.802  16
  -2  -8  15 3832.14 506.470   1
   2  -8 -15 4849.24 625.196  12
   2  -8 -15 4482.20 544.951  24
   2  -8 -15 4427.70 518.662   4
   2   8 -15 5164.08 620.936  27
   2   8 -15 3770.11 538.273  15
  -2   8  15 4522.50 566.856   6
  -2  -8  15 4497.01 558.605   3
  -2   8  15 5030.16 609.288  18
  -2  -8  15 3922.64 538.876  21
  -2   8  14 9769.34 815.682   5
   2  -8 -14 8792.32 712.505   8
  -2  -8  14 10563.4 832.292   3
   2   8 -14 10345.5 848.687  27
  -2   8  14 9119.78 796.779  18
  -2  -8  14 9720.41 818.516  16
  -2  -8  14 9591.45 822.212  21
   2  -8 -14 8344.47 725.110  24
   2  -8 -14 8794.46 818.446  12
  -2  -8  14 8002.82 704.423   1
   2  -8 -14 9053.27 712.242   4
   2   8 -14 8971.94 803.674  15
  -2   8  14 9529.03 800.962   6
  -2  -8  13 4694.39 519.030   1
  -2   8  13 5592.63 607.259  18
   2  -8 -13 4330.35 483.666   8
  -2  -8  13 6433.30 663.811  16
   2  -8 -13 5121.57 511.688   4
   2  -8 -13 4793.04 598.883  12
   2  -8 -13 4915.97 548.083  24
  -2   8  13 5380.71 591.339   6
   2   8 -13 4847.73 581.293  27
   2   8 -13 4245.98 549.744  15
  -2   8  13 5673.64 610.661  25
  -2   8  13 5439.73 521.472  19
  -2  -8  13 4709.89 566.680  21
  -2  -8  13 5180.18 575.762   3
  -2   8  12 2127.71 327.601  19
   2  -8 -12 2148.56 374.851  24
  -2   8  12 1899.89 366.006  18
   2  -8 -12 1426.20 288.213   8
   2  -8 -12 1822.65 388.411  12
  -2  -8  12 1483.56 294.699   1
  -2   8  12 1441.47 317.778  25
   2   8 -12 1665.04 350.855  15
  -2   8  12 1674.67 347.616   6
   2  -8 -12 1815.27 297.955   4
  -2  -8  12 1578.14 336.081  16
  -2  -8  12 1747.12 337.006   3
  -2  -8  12 1033.36 282.386  21
   2   8 -12 2100.39 395.869  27
  -2  -8  11-90.9385 174.600  21
   2  -8 -11 84.0974 176.504  12
  -2   8  11 39.1124 148.038  25
   2  -8 -11-49.4033 159.381   8
   2   8 -11 64.1461 147.663  27
   2  -8 -11-66.5677 147.939  24
   2   8 -11 47.7925 157.368  15
  -2  -8  11 191.905 173.099   3
   2  -8 -11 71.3497 105.885   4
  -2  -8  11 34.7805 124.274   1
  -2   8  11 90.2600 121.242  19
  -2   8  11-539.364 230.331  18
  -2   8  11 82.2929 151.811   6
  -2  -8  11 124.900 164.583  16
   2   8 -10 1209.64 322.200  27
   2   8 -10 1453.77 326.307  15
   2  -8 -10 1608.31 254.930   4
  -2  -8  10 1468.19 313.219   3
   2  -8 -10 1361.89 268.706   8
  -2  -8  10 2252.73 332.008   1
  -2   8  10 1561.18 314.895  25
  -2   8  10 1617.84 353.640  18
   2  -8 -10 1387.07 284.225  24
  -2   8  10 2035.21 293.135  29
   2  -8 -10 1761.34 351.029  12
  -2  -8  10 1724.42 340.012  21
  -2   8  10 1469.09 310.155   6
  -2  -8  10 1421.84 318.825  16
  -2   8  10 1718.29 299.853  19
  -2   8   9 2808.63 397.637  25
   2  -8  -9 2903.78 370.871   8
   2   8  -9 3331.38 432.407  29
  -2   8   9 3054.12 436.261  18
   2   8  -9 3912.53 396.439  18
   2   8  -9 3861.28 502.332  27
  -2  -8   9 3489.38 384.923   1
   2  -8  -9 2704.89 423.903  12
   2  -8  -9 3078.72 400.085  24
  -2   8   9 3078.16 427.861   6
   2   8  -9 3007.09 416.576  15
   2   8  -9 3708.46 457.699   6
  -2   8   9 3710.89 390.165  29
  -2  -8   9 3521.05 450.215  21
   2  -8  -9 3458.39 341.950   4
  -2   8   9 3285.29 401.229  19
  -2  -8   9 2844.55 415.598   3
  -2  -8   9 3799.65 475.460  16
   2   8  -8 21646.6 1127.38  29
  -2  -8   8 20434.6 1092.97   3
   2   8  -8 19893.7 1077.79  15
   2   8  -8 21899.7 926.225  25
  -2   8   8 22218.0 1151.95  18
  -2   8   8 22357.6 999.189  29
   2  -8  -8 23875.7 958.498   3
  -2  -8   8 23099.4 1179.71  16
  -2   8   8 22390.1 1054.67  19
   2   8  -8 24720.2 982.786   9
  -2  -8   8 20333.5 1076.09  21
  -2   8   8 20987.1 1049.78  25
   2   8  -8 22254.0 1108.87   6
  -2  -8   8 22550.9 967.523   1
   2   8  -8 20078.1 1100.64  27
   2  -8  -8 19719.9 1022.41  24
   2  -8  -8 20785.6 984.863   8
   2  -8  -8 20229.7 1122.95  12
   2   8  -8 23545.9 1020.09  18
  -2   8   8 22095.8 1128.37   6
   2   8  -7 13070.6 850.490  29
   2   8  -7 12821.8 832.511  15
   2   8  -7 14566.7 730.900  25
   2  -8  -7 11689.4 722.265   8
  -2  -8   7 12987.9 830.784  21
   2  -8  -7 14422.1 743.522   3
   2  -8  -7 13795.4 848.798  28
  -2   8   7 14024.4 820.237  19
   2  -8  -7 13733.6 678.322  21
   2   8  -7 13825.3 887.893  27
  -2   8   7 13598.3 809.500  25
   2   8  -7 14751.7 757.781   9
  -2   8   7 13896.0 886.065  18
  -2  -8   7 14251.8 910.980  16
  -2   8   7 12968.8 752.025  29
   2  -8  -7 14194.6 901.795  12
   2   8  -7 13537.0 845.871   6
   2   8  -7 13618.3 768.911  18
  -2  -8   7 13653.3 706.221   1
  -2   8   7 13384.3 861.514   6
   2  -8  -7 12911.8 794.189  24
  -2  -8   7 13318.4 851.729   3
   2  -8  -6 28520.7 1203.97  24
  -2   8   6 28004.7 1183.99  25
   2  -8  -6 29669.5 1272.74  28
   2   8  -6 27714.8 1243.82   6
  -2   8   6 28178.3 1203.22  19
   2   8  -6 28765.4 1172.13  18
  -2   8   6 29149.5 1178.38  29
  -2  -8   6 29816.3 1045.18   1
  -2  -8   6 29444.5 1331.54  16
   2  -8  -6 26559.1 1109.09   8
  -2  -8   6 26798.8 1242.01   3
   2  -8  -6 30709.5 1147.10   3
  -2   8   6 29382.2 1310.42  18
   2   8  -6 28151.3 1280.36  27
  -2  -8   6 28219.7 1235.29  21
   2   8  -6 29169.9 1087.69  25
   2  -8  -6 28349.7 1289.87  12
   2  -8  -6 28694.9 1050.88  21
   2   8  -6 28657.2 1287.41  29
  -2   8   6 28472.7 1271.38   6
  -2   8   5 6997.82 614.587   6
   2  -8  -5 5818.26 450.610  21
  -2  -8   5 6379.29 565.516   3
   2  -8  -5 6064.28 526.332  24
  -2  -8   5 6383.89 587.455  16
   2   8  -5 6958.52 601.987  29
   2   8  -5 6748.11 583.980   6
  -2   8   5 6265.82 521.081  29
   2  -8  -5 5873.73 561.770  12
  -2   8   5 7026.28 615.685  18
   2  -8  -5 5933.04 493.141   8
  -2  -8   5 6518.94 427.124   1
   2   8  -5 6863.57 550.385  18
  -2   8   5 5235.29 495.397  19
   2   8  -5 6757.45 494.706  25
   2  -8  -5 7250.98 530.146   3
   2  -8  -5 6467.61 567.787  28
  -2  -8   5 5974.28 550.670  21
  -2   8   5 6475.11 518.728  25
  -2   8   4 2759.12 339.754  25
  -2  -8   4 2995.78 419.108  16
  -2   8   4 2695.14 365.416  19
   2  -8  -4 2542.71 359.734  28
  -2   8   4 2840.92 392.227  18
   2   8  -4 3044.51 376.532  18
   2  -8  -4 2650.57 351.736  24
  -2  -8   4 2454.72 352.828  21
   2  -8  -4 2765.12 319.539  21
  -2   8   4 3074.24 369.442  29
  -2  -8   4 2765.12 362.550   3
   2   8  -4 2809.38 387.733  29
   2   8  -4 2948.75 328.450  25
   2  -8  -4 2240.91 306.578   8
   2   8  -4 2901.37 386.280   6
  -2   8   4 3100.31 407.706   6
   2  -8  -4 1984.66 288.936   3
  -2  -8   4 2898.89 339.291  12
   2  -8  -4 3278.60 411.338  12
  -2   8   3 6948.79 591.540   6
  -2  -8   3 6688.79 548.355  21
   2   8  -3 7418.12 574.201  18
   2  -8  -3 7450.41 607.761  28
   2  -8  -3 7010.76 553.772  24
   2   8  -3 7249.76 525.690  25
  -2  -8   3 7862.84 652.975  16
  -2  -8   3 7181.15 535.865  12
   2  -8  -3 6530.91 525.031   3
   2  -8  -3 6421.60 505.863   8
  -2  -8   3 6806.73 559.357   3
  -2   8   3 7332.83 537.421  25
   2  -8  -3 6882.99 582.480  12
   2  -8  -3 6731.78 500.451  21
  -2   8   3 6891.34 561.422  29
   2   8  -3 6574.33 579.941   6
   2   8  -3 8189.33 639.391  29
  -2   8   3 7355.66 612.310  18
  -2   8   3 6295.07 553.208  19
   2  -8  -2 16895.3 920.484  12
   2   8  -2 18280.0 969.099  29
   2  -8  -2 19898.4 1011.84  28
   2  -8  -2 17987.8 905.043   3
  -2   8   2 18888.8 994.347   6
   2   8  -2 18956.8 882.249  25
   2   8  -2 19727.8 970.867  18
  -2  -8   2 19711.3 957.752   3
  -2   8   2 19084.0 963.654  29
   2  -8  -2 17618.9 846.994  21
   2  -8  -2 19900.0 786.858  10
  -2   8   2 17697.3 946.656  19
  -2   8   2 19562.3 868.142  25
  -2  -8   2 19911.7 959.326  21
  -2  -8   2 19354.1 1033.21  16
   2   8  -2 18161.6 981.325   6
   2  -8  -2 16735.8 848.984   8
  -2  -8   2 18078.5 878.079  12
  -2   8   2 18426.3 973.608  18
  -2  -8   1 34276.4 1272.53  12
   2  -8  -1 32709.3 1288.49   3
  -2   8   1 35370.7 1358.10  29
  -2  -8   1 31922.5 1259.07  21
  -2   8   1 34963.7 1375.29  18
  -2   8   1 31437.6 1318.21  19
  -2   8   1 34385.8 1183.75  25
  -2  -8   1 32046.1 1291.89   8
   2   8  -1 34253.4 1264.26  25
   2  -8  -1 31722.3 1215.64   8
   2  -8  -1 32312.9 1218.34  21
   2   8  -1 32309.4 1357.58   6
   2   8  -1 34727.3 1350.75  18
  -2  -8   1 32731.3 1282.92   3
   2   8  -1 34439.8 1359.95  29
  -2  -8   1 34356.7 1429.82  16
  -2   8   1 32912.8 1349.66   6
   2  -8  -1 36669.8 1169.93  10
   2  -8  -1 34698.6 1390.35  28
  -2  -8   1 36171.5 1082.08  10
  -2  -8   1 34685.9 1319.13  28
   2   8   0 64503.6 1991.43  29
  -2  -8   0 63869.7 1893.00  21
   2  -8   0 62337.1 1864.44  21
  -2   8   0 62972.8 1978.63  18
  -2   8   0 62249.9 1969.50  29
  -2  -8   0 63406.4 1893.55   3
   2   8   0 63181.2 1979.67  18
  -2  -8   0 61996.7 1657.92  20
  -2   8   0 66501.4 1763.96  25
  -2  -8   0 64503.4 1925.12  28
  -2   8   0 63956.1 2015.77   6
  -2  -8   0 65348.3 1912.78  12
  -2  -8   0 62909.6 1781.62  24
  -2  -8   0 62770.2 1932.32   8
   2  -8   0 66702.3 1972.92   3
   2  -8   0 69858.8 1818.31  10
   2  -8   0 67218.6 2103.00  16
   2   8   0 65319.0 2053.73   6
   2   8   0 64655.5 1907.55  25
  -2  -8   0 68464.6 2136.95  16
   2   8   1 4027.32 425.975  25
  -2  -8  -1 4179.72 419.033   3
   2   8   1 4457.84 471.830  29
  -2  -8  -1 4164.05 433.294  12
   2  -8   1 4453.21 403.011  10
  -2   8  -1 4470.62 469.842   6
   2  -8   1 4872.80 521.826  16
  -2   8  -1 3643.73 414.403  18
   2  -8   1 4427.33 460.322   3
   2   8   1 4209.03 465.812  18
  -2  -8  -1 3153.35 389.172   8
  -2   8  -1 4204.50 357.059  25
  -2  -8  -1 4278.68 428.880  21
  -2   8  -1 4590.82 475.548  29
  -2  -8  -1 4494.48 438.308  28
  -2  -8  -1 3931.45 334.144  20
  -2  -8  -1 3822.26 385.269  24
   2   8   1 5320.17 524.334   6
   2  -8   1 3908.06 414.315  21
  -2   8  -2 2349.88 259.784  25
   2   8   2 1969.07 309.858  25
   2   8   2 1934.97 315.442  29
  -2  -8  -2 2408.51 344.570  12
  -2  -8  -2 2338.42 318.472  28
  -2  -8  -2 2099.55 236.228  20
  -2   8  -2 2711.00 368.636  29
   2  -8   2 2619.16 316.394  10
   2   8   2 2631.84 386.708   6
  -2   8  -2 2271.68 333.272   6
   2  -8   2 2505.49 345.777  21
   2  -8   2 2171.11 351.951  16
  -2  -8  -2 2509.91 347.016   8
  -2   8  -2 2577.48 335.358  15
  -2  -8  -2 2613.81 330.849   3
   2   8   2 2807.85 388.423  18
  -2   8  -2 2806.66 366.863  18
  -2  -8  -2 1872.77 276.924  24
   2  -8   2 2605.39 364.034   3
  -2   8  -2 2493.96 255.111   2
  -2  -8  -2 2144.37 302.430  21
   2   8   3 256.611 146.826  29
  -2   8  -3 214.038 149.543   6
  -2  -8  -3 224.410 121.342  21
   2  -8   3 125.064 138.721  16
   2  -8   3 746.321 234.397  21
   2   8   3 142.772 109.147  19
  -2   8  -3 329.091 143.880  15
  -2  -8  -3 353.378 141.683   3
   2   8   3 140.723 152.904   6
  -2  -8  -3 525.671 166.088  28
   2  -8   3 607.274 208.006   3
  -2  -8  -3 556.361 176.996   8
  -2  -8  -3 223.000 130.239  24
   2   8   3 243.263 161.915  18
  -2  -8  -3 179.376 154.439  12
   2  -8   3 163.812 112.216  10
   2   8   3 472.668 173.353  25
  -2   8  -3 260.729 141.974  18
  -2   8  -3 231.461 104.783   2
   2  -8   4 9361.74 714.645  16
  -2  -8  -4 7769.81 632.184  12
  -2   8  -4 9624.84 676.734  18
   2  -8   4 9306.85 676.728  21
   2   8   4 9411.43 718.460  18
  -2  -8  -4 9730.59 599.124   3
  -2  -8  -4 10407.4 676.920  28
   2   8   4 9937.97 703.383  25
   2   8   4 8765.05 638.084  29
  -2   8  -4 9140.75 673.408   6
  -2  -8  -4 8794.48 594.797  21
  -2   8  -4 9785.79 567.468   2
  -2   8  -4 9151.62 655.893  15
   2  -8   4 9209.48 691.794   3
  -2  -8  -4 8174.73 626.414   8
   2   8   4 8223.78 592.875  19
  -2  -8  -4 8800.62 597.049  24
   2   8   4 9256.66 702.762   6
   2   8   5 20340.0 996.433  29
  -2   8  -5 22069.9 1051.93  18
   2   8   5 21119.3 973.645  19
   2  -8   5 21505.2 1062.74  21
   2  -8   5 21274.8 1085.97   3
  -2  -8  -5 18542.5 977.669   8
  -2  -8  -5 20149.4 952.290  24
  -2   8  -5 21860.0 922.342   2
  -2   8  -5 19957.3 1029.51   6
  -2  -8  -5 20465.2 1067.02  12
  -2  -8  -5 23097.0 927.722   3
   2   8   5 22304.9 1118.70   6
  -2   8  -5 18095.3 975.480  15
   2  -8   5 21039.9 1095.51  16
   2   8   5 20736.4 1064.69  25
   2   8   5 22384.6 1128.50  18
   2  -8   6 15976.1 931.546  21
  -2   8  -6 14832.8 782.959   2
   2   8   6 14058.5 890.938  25
  -2  -8  -6 13956.0 848.535   8
   2  -8   6 14820.1 918.368   3
  -2  -8  -6 14042.2 897.594  12
   2   8   6 15759.8 828.396  19
  -2   8  -6 14868.3 882.595  15
  -2   8  -6 16119.1 880.847  18
   2   8   6 15640.0 937.013   6
   2   8   6 15611.6 947.779  18
  -2   8  -6 17012.3 929.265   6
   2  -8   6 15013.9 935.397  16
  -2  -8  -6 14195.9 800.669  24
   2   8   6 17758.7 907.985  29
   2  -8   7 9210.36 714.179  21
   2  -8   7 9140.74 727.475  16
  -2   8  -7 10229.6 719.142   6
  -2   8  -7 8399.51 675.394  15
  -2   8  -7 8626.55 593.357  11
  -2  -8  -7 8747.52 630.890  24
   2   8   7 9157.59 721.835   6
   2   8   7 8506.96 704.474  18
  -2   8  -7 8424.57 703.014  27
   2   8   7 9068.59 716.521  25
  -2  -8  -7 8402.47 694.394  12
   2  -8   7 8646.07 703.578   3
   2   8   7 9331.72 627.213  19
   2   8   7 9705.63 663.057  29
  -2   8  -7 9315.14 660.299  18
  -2   8  -7 8899.53 615.732   2
  -2  -8  -7 7574.67 622.780   8
   2  -8   8 3977.50 483.257  16
  -2   8  -8 3840.09 423.303   2
  -2   8  -8 3581.46 468.369  27
  -2   8  -8 3082.41 349.516  11
  -2  -8  -8 3337.79 444.751  12
  -2   8  -8 3958.99 430.563  18
  -2  -8  -8 2715.64 383.563   8
   2  -8   8 3485.52 473.209   3
   2  -8   8 3578.09 475.396  21
   2   8   8 3306.46 453.995  25
  -2   8  -8 4325.01 469.333   6
   2   8   8 3614.20 459.470   6
   2   8   8 3659.09 407.120  29
   2   8   8 4640.76 432.056  19
  -2   8  -8 2956.24 413.093  15
   2   8   8 4375.59 519.227  18
  -2  -8  -8 3457.60 408.054  24
   2   8   9 518.427 201.420  25
  -2   8  -9 961.914 213.262  18
  -2  -8  -9 580.264 197.364  24
   2  -8   9 636.925 223.169  16
  -2   8  -9 595.622 196.499   2
  -2  -8  -9 944.685 285.549  12
   2  -8   9 474.059 209.346  21
   2   8   9 1142.41 241.774  29
  -2   8  -9 736.961 252.762  15
  -2   8  -9 1251.67 317.122  27
   2   8   9 619.573 223.961   6
   2   8   9 364.680 205.527  18
   2  -8   9 822.515 251.848   3
  -2  -8  -9 789.460 234.117   8
  -2  -8 -10 147.117 163.613  24
  -2   8 -10 92.5820 127.986   2
   2  -8  10-88.4623 171.675   3
   2  -8  10 229.541 178.928  21
   2   8  10 142.606 158.761  25
  -2  -8 -10 189.738 163.452  12
  -2   8 -10-65.8600 177.311  15
   2   8  10 383.483 208.635  18
  -2  -8 -10 336.485 186.388   8
   2  -8  10 19.1531 156.730   1
  -2   8 -10 153.137 202.920  27
   2  -8  10 84.3157 119.109  16
   2   8  10 137.551 165.163   6
   2  -8  11 1203.02 315.439  21
   2  -8  11 921.490 274.386   1
   2   8  11 995.597 277.253   6
  -2   8 -11 1057.36 261.049   2
   2   8  11 851.675 283.207  18
   2  -8  11 772.279 254.591   3
   2  -8  11 1514.70 322.453  16
  -2   8 -11 1459.19 333.593  27
  -2  -8 -11 970.566 274.353   8
  -2   8 -11 546.422 231.851  15
  -2  -8 -11 636.524 246.589  12
  -2  -8 -11 1263.59 287.835  24
   2   8  11 823.909 291.376  25
   2  -8  12 18328.2 1124.65  16
  -2  -8 -12 16446.3 1030.06   8
   2  -8  12 17843.4 1108.46   3
   2   8  12 19285.1 1168.06  18
   2  -8  12 17260.6 1047.38   1
   2  -8  12 18796.6 1146.96  21
   2   8  12 20202.9 1159.10   6
  -2   8 -12 19649.6 1113.15   2
  -2   8 -12 20366.1 1190.57  27
   2   8  12 18046.8 1152.07  25
  -2   8 -12 16116.2 1064.29  15
  -2  -8 -12 19574.4 1210.36  12
  -2  -8 -12 19233.6 1064.95  24
   2  -8  13 15185.9 1046.35  21
   2   8  13 16684.9 1071.40   6
  -2   8 -13 14234.2 1013.99  15
   2  -8  13 15648.8 1045.88   3
  -2  -8 -13 13369.2 943.226   8
  -2  -8 -13 13128.1 906.183  24
   2   8  13 15407.6 1053.77  18
   2  -8  13 15547.4 1045.10  16
   2  -8  13 13704.2 955.399   1
   2   8  13 14397.8 1055.73  25
  -2  -8 -13 15188.9 1085.42  12
  -2   8 -13 14078.8 979.935   2
  -2   8 -13 15318.2 1041.44  27
   2   8  14 7521.33 740.584   5
   2  -8  14 7980.98 749.070   3
  -2   8 -14 7531.88 738.131  27
   2   8  14 7158.98 762.319  25
  -2  -8 -14 7339.53 767.176  12
  -2   8 -14 6940.76 736.555  15
  -2  -8 -14 7775.47 701.756  24
   2  -8  14 6819.14 716.036  21
  -2   8 -14 7841.84 750.486   2
   2  -8  14 6475.25 678.902   1
   2   8  14 7888.69 743.645   6
   2   8  14 7988.08 773.846  18
  -2  -8 -14 6627.39 676.248   8
   2  -8  14 7274.52 726.517  16
  -2   8 -15 492.224 265.331  15
   2  -8  15 111.015 147.856   3
  -2  -8 -15-26.0188 178.245   8
   2  -8  15 312.237 228.565  16
   2   8  15 103.236 145.168   6
   2   8  15-8.90941 171.607  18
  -2   8 -15 207.463 170.082  27
   2   8  15 67.5935 204.306  25
   2   8  15-52.9993 209.275   5
   2  -8  15 205.491 190.908   1
  -2  -8 -15 12.6441 218.987  12
   2  -8  15 112.443 176.948  21
  -2  -8 -15-16.6972 169.464  24
  -2   8 -15 11.4186 227.033   2
   2   8  16-137.099 189.540  18
   2  -8  16 361.663 248.792  21
   2   8  16-273.671 194.638   6
  -2  -8 -16-105.618 141.359  24
   2   8  16-91.5917 213.758  25
   2  -8  16 106.464 154.635   1
  -2  -8 -16-137.602 192.109   8
  -2   8 -16 71.8164 177.404  27
  -2  -8 -16 137.195 234.534  12
   2   8  16-17.6686 223.933   5
  -2   8 -16-246.850 258.966  15
   2  -8  16-301.258 207.122  16
   2  -8  16-2.11770 130.571   3
   2  -8  17 1094.48 316.424  21
  -2  -8 -17 704.964 258.220  24
  -2   8 -17 848.134 298.651  15
   2   8  17 725.764 268.281  18
   2   8  17 892.925 275.611   6
   2   8  17 1222.46 368.938  25
   2   8  17 653.292 282.548   5
  -2   8 -17 1280.93 351.607  27
   2  -8  17 736.246 296.076   1
  -2  -8 -17 1550.11 407.768  12
  -2  -8 -17 497.484 243.206   8
   2  -8  18 3344.61 545.663   1
  -2   8 -18 2864.68 524.289  15
  -2  -8 -18 1910.06 404.041   8
  -2  -8 -18 3603.93 595.667  12
   2   8  18 3468.56 556.839   5
   2   8  18 3285.46 522.437  18
   2   8  18 3411.70 584.889  25
   2  -8  18 3291.78 541.972  21
  -2  -8 -18 3131.01 507.685  24
  -2 -10  18-108.053 197.041  16
   2 -10 -18 110.034 205.396   8
  -2  10  18 497.743 273.005   6
  -2 -10  18-268.155 251.884   3
  -2  10  18-320.508 233.522  18
  -2 -10  18 76.4779 194.515   1
  -2 -10  17 18.9924 160.210   1
   2  10 -17-47.3984 217.973  27
  -2 -10  17-177.019 222.367   3
   2 -10 -17-470.042 254.876  24
  -2  10  17-69.9285 202.360   6
   2  10 -17 116.517 242.724  15
  -2 -10  17 162.211 258.104  21
  -2 -10  17 131.282 153.456  16
   2 -10 -17 179.730 263.214  12
   2 -10 -17-76.2606 168.182   8
  -2  10  17 47.8832 204.583  25
  -2  10  17 226.198 209.123  18
  -2 -10  16 471.019 230.091  21
   2 -10 -16 262.168 189.389  24
  -2  10  16 649.331 286.455  18
   2  10 -16 862.123 330.289  15
   2 -10 -16 609.002 329.370  12
  -2 -10  16 497.586 225.157   1
   2  10 -16 589.950 322.175  27
  -2  10  16 953.488 323.386  25
  -2  10  16 585.854 288.703   6
  -2 -10  16 749.021 300.901  16
  -2 -10  16 511.734 253.427   3
   2 -10 -16 760.924 277.081   8
   2  10 -15 4585.56 629.991  15
   2  10 -15 6068.25 731.575  27
  -2 -10  15 6656.36 771.425  16
   2 -10 -15 4748.68 663.736  12
  -2  10  15 6952.28 758.336  25
  -2  10  15 5595.89 693.140  18
  -2  10  15 7893.23 804.665   6
  -2 -10  15 6621.12 729.985   3
  -2 -10  15 5197.52 660.115  21
   2 -10 -15 6905.27 725.774  24
  -2 -10  15 5527.91 609.981   1
   2 -10 -15 4961.88 593.794   8
  -2 -10  14 248.291 212.533  16
  -2 -10  14-15.3638 190.043   3
  -2 -10  14 232.236 201.009  21
  -2  10  14 54.5553 178.361  25
   2  10 -14 48.3461 182.021  15
   2 -10 -14 245.921 205.716   8
   2 -10 -14-68.1892 163.628  24
   2 -10 -14 290.980 245.914  12
  -2 -10  14 285.112 190.478   1
   2  10 -14 64.6801 212.167  27
  -2  10  14-163.884 230.952   6
  -2  10  14 136.617 194.385  18
   2 -10 -13 7165.56 794.714  12
  -2  10  13 7123.64 765.565  18
  -2 -10  13 7357.03 763.990   3
   2 -10 -13 6432.37 653.226   8
  -2 -10  13 8471.77 841.363  16
  -2  10  13 7038.80 725.641  25
  -2  10  13 7580.52 778.263   6
   2  10 -13 6434.28 718.556  15
   2 -10 -13 6993.46 707.683  24
  -2 -10  13 6171.59 695.025  21
   2  10 -13 8577.78 839.650  27
  -2 -10  12-11.0625 174.105   3
  -2  10  12 9.47121 223.538  18
  -2  10  12 300.222 216.118  25
   2  10 -12 1.30712 180.582  15
  -2  10  12 572.613 247.297   6
  -2 -10  12 94.1903 231.943  21
  -2 -10  12 126.058 187.792  16
   2 -10 -12 249.689 186.638   8
   2  10 -12 279.834 252.362  27
   2 -10 -12 269.017 226.873  12
   2 -10 -12 153.641 164.589  24
  -2  10  11-150.272 226.742  18
   2 -10 -11 54.0256 131.211  24
  -2  10  11 152.562 176.712  25
  -2  10  11 7.37613 149.742   6
   2 -10 -11-100.289 155.765   8
   2 -10 -11-9.66697 195.260  12
  -2  10  11-74.1057 167.102  19
  -2 -10  11 140.855 190.848   3
  -2 -10  11-116.153 199.172  21
   2  10 -11 261.183 195.230  15
   2  10 -11 282.770 217.086  27
  -2 -10  11 61.9487 167.082  16
  -2 -10  10 218.185 190.419   3
   2  10 -10 289.958 216.216  27
   2  10 -10 183.805 200.171  15
   2 -10 -10-84.3349 172.848  12
  -2  10  10 38.3876 152.801  19
  -2 -10  10-57.6794 192.244  21
   2 -10 -10-35.0580 142.350  24
  -2  10  10 99.1896 168.749  25
  -2 -10  10 377.552 206.943  16
  -2  10  10 375.568 199.474   6
   2 -10 -10 234.934 174.966   8
  -2  10  10 138.518 211.766  18
  -2 -10   9 7170.90 698.513  21
   2  10  -9 7435.75 711.837  15
   2  10  -9 7423.38 751.483  27
   2  10  -9 7759.19 731.144   6
  -2  10   9 8709.16 802.193  18
  -2 -10   9 7624.67 736.041   3
   2 -10  -9 6637.57 617.508   8
  -2  10   9 8222.16 656.647  29
  -2 -10   9 9082.36 826.333  16
   2 -10  -9 7583.40 753.826  12
  -2  10   9 7951.73 685.200  19
  -2  10   9 8045.73 757.739   6
   2 -10  -9 7043.51 659.448  24
  -2  10   9 7732.08 700.687  25
   2  10  -8 557.031 284.077  27
  -2  10   8 266.421 211.812  18
  -2  10   8 292.069 196.702  25
   2  10  -8 261.933 223.277  15
   2 -10  -8 152.055 146.708   8
   2 -10  -8-247.400 225.350  24
  -2 -10   8 444.246 229.057   3
   2  10  -8 53.4515 164.888   6
  -2 -10   8 1.28679 160.805  16
  -2  10   8 234.920 128.307  29
  -2  10   8 134.927 183.327   6
  -2 -10   8 396.394 222.577  21
   2 -10  -8 201.824 227.104  12
  -2  10   8 55.9357 132.208  19
  -2  10   7 16161.1 944.520  29
   2  10  -7 13449.2 969.159   6
  -2 -10   7 15769.2 1072.14  16
   2 -10  -7 13845.5 979.584  12
  -2 -10   7 14009.2 969.811   3
  -2  10   7 14680.7 1016.39  18
   2  10  -7 16545.2 921.833   9
  -2  10   7 14997.9 938.032  25
   2 -10  -7 13390.0 864.879   8
   2 -10  -7 13346.2 891.648  24
  -2  10   7 15848.5 977.897  19
   2  10  -7 16574.1 1055.57  29
   2  10  -7 15366.6 914.475  18
   2  10  -7 13718.4 996.939  27
  -2 -10   7 14538.9 951.043  21
   2  10  -7 12628.1 900.150  15
  -2  10   7 14134.0 989.107   6
  -2  10   6 47.2178 133.251  19
   2  10  -6 48.0902 154.210   9
   2  10  -6 313.797 153.893  15
   2 -10  -6 185.889 143.488  28
  -2  10   6 398.955 216.458   6
  -2 -10   6 276.081 191.885  21
  -2  10   6 308.760 166.207  25
  -2  10   6 162.727 177.711  18
   2  10  -6 194.849 199.960  27
   2 -10  -6 317.805 218.156  12
  -2 -10   6 208.344 164.749   3
   2  10  -6 495.440 234.268   6
  -2  10   6 405.597 193.867  29
   2 -10  -6 418.011 217.470  24
  -2 -10   6 318.433 234.575  16
   2  10  -6 244.639 120.830  18
   2 -10  -6 454.462 191.594   8
   2  10  -6 166.971 163.794  29
   2 -10  -6 611.546 189.861   3
  -2  10   5 1700.84 321.469  19
   2 -10  -5 1198.46 276.945  28
   2 -10  -5 1036.46 291.232  12
   2  10  -5 1431.91 319.079   6
  -2  10   5 1552.70 334.964  18
  -2  10   5 1687.12 329.114  29
   2  10  -5 1051.78 243.870  18
   2 -10  -5 1342.83 291.543  24
   2 -10  -5 946.731 236.768   8
  -2 -10   5 1914.26 364.134   3
  -2 -10   5 1643.06 326.051  21
  -2 -10   5 2482.45 428.312  16
   2  10  -5 1461.20 330.795  29
   2 -10  -5 1768.95 288.228  21
  -2  10   5 1362.42 288.381  25
   2 -10  -5 1470.98 281.423   3
  -2  10   5 1486.91 334.379   6
   2  10  -5 1876.49 365.620  27
  -2  10   4 1170.60 311.263   6
  -2 -10   4 901.558 240.604  12
   2  10  -4 930.197 281.533   6
   2 -10  -4 742.182 205.092   8
  -2  10   4 996.150 268.447  29
   2  10  -4 1238.08 274.708  18
   2 -10  -4 1110.93 261.857   3
   2 -10  -4 1096.93 229.309  21
   2 -10  -4 997.656 259.672  28
  -2 -10   4 1077.15 315.787  16
  -2  10   4 1416.87 316.259  18
   2 -10  -4 790.943 240.899  24
   2  10  -4 1069.33 235.272  25
  -2 -10   4 693.740 242.990  21
  -2  10   4 913.059 235.968  25
   2  10  -4 1015.11 298.361  29
  -2  10   4 968.927 263.415  19
  -2 -10   4 1266.75 299.088   3
   2 -10  -4 1086.47 306.692  12
  -2  10   3 3819.07 505.271   6
   2 -10  -3 4431.88 460.140  21
   2 -10  -3 4534.47 498.644   3
  -2 -10   3 4892.26 542.214   3
  -2 -10   3 5091.86 601.128  16
   2 -10  -3 4691.34 532.814  12
   2  10  -3 5174.28 539.541  18
  -2 -10   3 5134.90 543.734  21
   2 -10  -3 4161.79 466.353  24
  -2 -10   3 4177.98 496.328   8
   2 -10  -3 3924.47 447.982   8
   2  10  -3 4329.47 452.713  25
  -2 -10   3 5112.11 501.821  12
   2  10  -3 5331.23 579.062   6
  -2  10   3 5145.09 490.931  25
  -2  10   3 4819.78 532.074  29
   2 -10  -3 5080.78 557.866  28
  -2  10   3 5582.81 596.279  18
   2  10  -3 4648.98 544.770  29
   2  10  -2 1852.95 394.537   6
  -2 -10   2 1853.27 331.303  21
   2 -10  -2 1629.58 305.729  24
   2 -10  -2 1661.36 338.292  12
  -2  10   2 1270.11 309.018   6
  -2 -10   2 2189.74 326.502  24
  -2  10   2 1621.97 282.663  25
  -2 -10   2 1694.01 314.884  12
  -2 -10   2 2031.35 357.363   3
   2  10  -2 1918.61 306.428  25
   2 -10  -2 2055.95 334.087   8
  -2 -10   2 1704.01 339.278   8
  -2 -10   2 2433.13 430.551  16
  -2 -10   2 1744.27 323.639  28
   2 -10  -2 1936.30 314.402  21
  -2  10   2 1848.70 351.218  29
   2  10  -2 1872.97 350.846  18
   2 -10  -2 1718.59 339.678  28
  -2  10   2 1469.40 315.087  18
   2 -10  -2 1614.57 306.719   3
   2  10  -2 2117.58 381.447  29
   2 -10  -1 18591.9 1075.43  28
  -2 -10   1 16850.8 990.483   3
   2 -10  -1 18622.2 1033.70   3
  -2  10   1 16051.4 1003.32  18
  -2  10   1 18953.9 1099.10   6
  -2 -10   1 18070.1 906.913  24
   2 -10  -1 17880.7 948.368  21
  -2 -10   1 14812.5 928.573   8
   2  10  -1 17945.5 1068.01  29
   2  10  -1 18256.9 1090.17   6
  -2 -10   1 19116.3 1033.83  28
  -2  10   1 19144.9 1074.78  29
   2 -10  -1 15816.7 963.758  12
  -2 -10   1 16965.4 955.210  12
   2 -10  -1 15016.1 887.724   8
  -2 -10   1 15466.9 927.544  21
   2  10  -1 18064.0 961.151  25
   2  10  -1 16645.8 1010.37  18
  -2  10   0 220.119 200.315  29
   2 -10   0 27.2829 148.243  21
  -2 -10   0-67.8665 135.863  28
   2 -10   0-66.7673 181.104   8
  -2 -10   0 117.050 145.055  12
   2  10   0-311.469 193.724  18
  -2 -10   0-142.334 146.276  24
   2 -10   0-32.1533 172.932   3
  -2 -10   0-92.2100 171.055   3
   2  10   0-46.3200 186.709   6
   2  10   0 121.243 140.304  25
   2  10   0-231.781 215.107  29
  -2  10   0 240.934 192.897   6
   2 -10   0 35.6716 151.516  12
   2 -10   0-69.4175 178.442  28
  -2  10   0-21.9758 194.507  18
  -2 -10   0 31.1329 136.370  21
  -2 -10   0 203.893 199.233   8
  -2 -10  -1 5251.86 544.049  12
  -2  10  -1 6411.63 630.718   6
  -2 -10  -1 6917.04 599.183   3
   2  10   1 6056.78 628.562   6
  -2 -10  -1 5471.73 562.324   8
  -2 -10  -1 6587.29 598.143  28
  -2  10  -1 6011.36 596.917  18
   2 -10   1 5903.76 626.025  28
   2  10   1 5390.52 542.249  25
   2 -10   1 5431.94 552.770  12
  -2 -10  -1 5785.32 514.809  24
  -2 -10  -1 5748.36 547.337  21
   2 -10   1 4779.64 499.700  21
   2  10   1 5800.18 599.478  29
   2 -10   1 5529.08 572.310   3
   2 -10   1 4849.50 510.735   8
  -2  10  -1 5622.09 535.051  15
   2  10   1 6155.03 627.904  18
  -2 -10  -2 157.514 114.824   3
  -2 -10  -2 37.3061 133.185  28
   2 -10   2 37.5010 99.0208  10
  -2 -10  -2-71.4239 190.552   8
   2  10   2 8.44330 164.330  18
   2  10   2 119.392 152.664  25
   2 -10   2-81.3274 173.217   3
  -2  10  -2-185.798 176.882  18
  -2 -10  -2-29.0655 131.863  24
   2 -10   2-170.460 248.983  16
  -2 -10  -2 101.926 146.879  21
  -2 -10  -2-1.64105 161.708  12
  -2  10  -2 114.683 131.704  15
  -2  10  -2-378.284 237.200   6
   2  10   2 49.7343 163.289   6
   2  10   2-250.139 191.203  29
   2 -10   2 2.47054 156.494  21
  -2  10  -3 222.454 131.609  18
   2 -10   3-473.893 229.136  16
   2  10   3-4.13443 136.899  29
  -2  10  -3 163.537 189.230   6
  -2  10  -3 90.1778 158.867  15
   2 -10   3-21.2169 132.232  10
  -2 -10  -3 131.900 145.407  12
   2  10   3 150.917 176.330  18
   2 -10   3-0.35655 135.167   3
  -2 -10  -3 187.829 135.624   3
  -2 -10  -3 164.600 149.734   8
  -2 -10  -3 333.681 179.185  28
   2  10   3-70.9735 196.659   6
  -2 -10  -3-9.04170 150.091  21
   2  10   3-70.6846 161.885  25
   2 -10   3 288.758 191.536  21
  -2 -10  -3 146.159 122.959  24
  -2 -10  -4 639.499 248.811  12
  -2 -10  -4 338.952 201.558   8
  -2 -10  -4 496.048 194.724  24
  -2  10  -4 863.607 258.313  15
  -2 -10  -4 462.374 181.862   3
  -2  10  -4 296.440 218.895   6
   2  10   4 749.518 250.741  25
   2 -10   4 496.617 179.686  10
   2  10   4 181.018 180.172   6
  -2 -10  -4 510.522 183.770  28
   2 -10   4 503.793 225.617  16
   2 -10   4 741.022 264.963   3
   2 -10   4 404.629 208.270  21
   2  10   4 316.511 179.650  18
  -2  10  -4 452.094 187.008  18
   2  10   4 604.933 221.763  29
  -2  10  -5 11498.5 820.846  15
   2  10   5 12224.6 853.645  29
  -2 -10  -5 12464.0 805.444  24
   2 -10   5 12290.0 933.362  16
  -2 -10  -5 10809.6 844.422  12
   2  10   5 11781.5 866.487  25
   2 -10   5 11325.5 866.081   3
   2 -10   5 13006.9 858.075  10
  -2 -10  -5 9961.55 784.300   8
   2  10   5 13027.8 944.289   6
  -2  10  -5 12584.7 864.461  18
   2 -10   5 11628.0 849.803  21
  -2  10  -5 11405.9 852.493   6
   2  10   5 12324.6 938.176  18
   2 -10   6-71.7280 178.772  16
   2  10   6 85.7217 141.501  29
   2 -10   6 165.818 183.926  10
  -2  10  -6 144.491 221.682  27
  -2 -10  -6 112.303 168.126  12
  -2 -10  -6 134.410 117.633  24
   2  10   6 7.10933 167.719  25
  -2 -10  -6 4.92092 181.565   8
  -2  10  -6 99.0205 158.590   6
   2 -10   6 149.292 174.301   3
  -2  10  -6 174.037 185.250  18
   2  10   6 154.487 174.023   6
  -2  10  -6 28.6257 156.856  15
   2 -10   6-46.0525 228.267  21
   2  10   6 5.76651 173.447  18
  -2  10  -7 14967.5 988.131  15
   2 -10   7 18151.5 1164.84  16
   2 -10   7 15582.7 1029.65  21
   2  10   7 14356.1 1002.15  25
   2 -10   7 16542.9 1080.32   3
  -2 -10  -7 13717.4 946.180   8
   2  10   7 16970.4 999.552  29
   2  10   7 16116.7 1070.32   6
  -2 -10  -7 16268.7 958.207  24
   2 -10   7 16777.1 1035.37  10
   2  10   7 16174.4 1100.73  18
  -2  10  -7 18601.9 1052.39  18
  -2 -10  -7 14648.3 1029.40  12
  -2  10  -7 16125.2 1034.18   6
  -2  10  -7 15311.8 1072.04  27
   2  10   8-97.7224 199.773   6
  -2 -10  -8 38.6791 180.553   8
   2  10   8 526.644 192.132  29
  -2  10  -8 313.244 206.324  15
   2 -10   8-45.4784 195.080  10
   2 -10   8-173.650 201.503   3
   2 -10   8 69.6841 165.378  16
  -2  10  -8 85.7564 178.821   6
  -2 -10  -8-29.3153 195.296  12
  -2 -10  -8-114.858 158.859  24
  -2  10  -8 77.1792 170.008  27
   2  10   8 186.887 219.839  25
   2  10   8 111.933 175.051  18
   2 -10   8 93.7220 197.704  21
  -2 -10  -9-32.9447 185.624   8
   2 -10   9 421.767 187.010   3
   2 -10   9-263.644 246.408  10
  -2  10  -9 363.873 231.467  27
   2  10   9 75.3477 191.039  18
   2  10   9-59.6805 177.521   6
  -2 -10  -9-112.383 227.956  12
  -2  10  -9-104.214 169.599  15
  -2 -10  -9 50.7559 158.254  24
   2 -10   9-54.9816 205.517  16
   2 -10   9-105.805 217.116  21
   2  10   9-74.1221 171.825  25
  -2  10 -10 351.230 199.421  27
  -2 -10 -10 165.593 174.128   8
   2  10  10 177.658 183.674   6
  -2 -10 -10 435.827 237.095  12
   2  10  10 122.862 185.862  18
  -2 -10 -10 67.3419 136.727  24
  -2  10 -10 37.0129 170.652  15
   2 -10  10 96.0103 171.335  16
   2 -10  10 203.056 180.143   3
   2 -10  10 282.885 213.210  21
   2  10  10 67.5678 194.032  25
  -2  10 -11 3793.48 560.741  27
   2 -10  11 3659.39 472.349   1
   2 -10  11 3865.49 570.098  16
   2 -10  11 2975.97 500.338  21
  -2 -10 -11 3478.41 556.439  12
   2 -10  11 3279.63 512.939   3
   2  10  11 3776.41 550.899   6
  -2 -10 -11 3374.80 468.330  24
  -2  10 -11 2728.02 468.718  15
  -2 -10 -11 3169.10 482.151   8
   2  10  11 3787.99 577.954  18
   2  10  11 3907.24 563.477  25
  -2 -10 -12 94.4908 154.788   8
   2  10  12 202.210 195.733   6
   2  10  12 61.4224 205.924  25
  -2 -10 -12 27.8569 180.708  12
  -2  10 -12 135.304 194.108  27
   2  10  12 608.632 290.413  18
   2 -10  12-33.0775 161.372   1
  -2 -10 -12 43.7002 165.729  24
  -2  10 -12-271.016 253.076  15
   2 -10  12 399.902 251.746  21
   2 -10  12-66.1952 188.713  16
   2 -10  12-28.0488 206.145   3
  -2 -10 -13 7157.88 818.450  12
  -2 -10 -13 6661.71 688.240  24
   2  10  13 7673.35 817.575  25
  -2 -10 -13 5364.76 640.698   8
  -2  10 -13 7694.62 806.625  27
   2 -10  13 6528.18 675.473   1
   2 -10  13 6486.24 734.119  16
   2  10  13 7115.97 773.394   6
   2 -10  13 7512.55 787.533   3
  -2  10 -13 6596.30 737.902  15
   2  10  13 7750.28 816.793  18
   2 -10  13 6432.35 733.391  21
  -2 -10 -14 114.672 164.572  24
   2 -10  14 562.323 282.439   3
   2 -10  14 380.928 227.875   1
   2  10  14 269.523 230.407  25
   2 -10  14 396.902 216.540  16
   2  10  14 246.321 203.749  18
  -2  10 -14 720.127 278.782  15
  -2  10 -14 590.901 325.101  27
  -2 -10 -14 129.284 226.806  12
  -2 -10 -14 729.727 275.708   8
   2 -10  14 5.45018 216.455  21
   2  10  14 63.6729 182.022   6
  -2  10 -15 1938.56 418.365  15
   2 -10  15 1203.85 352.745   3
  -2  10 -15 2325.79 487.916  27
  -2 -10 -15 1243.14 334.643   8
   2 -10  15 2637.77 510.930  21
   2  10  15 2069.51 455.639  18
  -2 -10 -15 1419.50 348.597  24
   2 -10  15 1832.93 392.829  16
   2 -10  15 1772.84 433.697  10
   2  10  15 1772.33 401.805   6
   2 -10  15 1315.15 326.895   1
   2  10  15 1557.22 408.498  25
  -2 -10 -15 1170.40 357.012  12
   2 -10  16-135.971 179.138   3
   2  10  16-11.1697 146.919   6
  -2 -10 -16-150.141 173.592  24
   2 -12 -13 505.147 249.441  24
  -2 -12  13 18.3823 136.849  10
  -2  12  13 693.744 297.584  25
   2 -12 -13 253.515 168.644   8
   2 -12 -12 1033.69 339.935  12
   2 -12 -12 647.677 261.178  24
   2 -12 -12 376.187 215.540   8
  -2 -12  12 1053.12 321.001   3
   2  12 -12 1043.05 313.751  15
  -2  12  12 508.393 264.547  25
  -2  12  12 1093.11 347.116   6
  -2 -12  12 382.220 217.817  21
   2  12 -12 1019.46 330.929  27
  -2 -12  12 1158.66 350.771  16
  -2  12  12 1035.41 319.718  18
   2 -12 -11 370.338 205.242   8
   2 -12 -11 889.781 315.115  12
  -2  12  11 339.205 226.737  18
  -2 -12  11 351.309 201.898   3
  -2 -12  11 433.962 239.810  21
   2  12 -11 466.568 255.718  15
  -2 -12  11 829.069 310.376  16
  -2  12  11 160.578 178.180   6
  -2  12  11 612.027 266.688  25
   2 -12 -11 184.093 202.338  24
   2  12 -11 101.444 209.251  27
   2 -12 -10 56.2409 180.601  12
  -2  12  10 180.480 215.409  18
   2 -12 -10-141.625 199.961   8
  -2 -12  10-6.28999 198.931  21
   2  12 -10 258.604 247.943  27
   2 -12 -10-62.9423 159.308  24
  -2  12  10-10.1015 192.858  25
  -2 -12  10-143.347 188.428  16
  -2  12  10-26.1056 172.167   6
  -2 -12  10 263.786 202.199   3
   2  12 -10 47.8464 159.787  15
  -2  12   9 2035.37 404.213  25
   2 -12  -9 1772.17 364.056  24
  -2  12   9 2140.81 454.398  18
  -2  12   9 2496.51 465.815   6
  -2 -12   9 2031.88 409.789  21
   2 -12  -9 1537.85 394.987  12
  -2 -12   9 2186.71 431.916   3
   2 -12  -9 1495.40 345.166   8
  -2 -12   9 1507.90 391.503  16
[truncated: 2,697,264 more chars]
