# Supplementary material for: Practical synthetic strategies towards lipophilic 6-iodotetrahydroquinolines and -dihydroquinolines
Source: Beilstein J Org Chem. 2016 Aug 16;12:1851–62. doi: 10.3762/bjoc.12.174 (PMC5082455; doi:10.3762/bjoc.12.174)
Supplement: File 2 — Crystallographic Information Files of compounds 13, 14, 15b, 19, 29, and 30. [file Beilstein_J_Org_Chem-12-1851-s002.zip › 29_ 1433622.cif]

data_mo_dc350_0m
_audit_creation_date              2015-11-16
_audit_creation_method
;
Olex2 1.2
(compiled 2015.09.30 svn.r3233 for OlexSys, GUI svn.r5103)
;
_shelxl_version_number            2014-3
_publ_contact_author_address      Chemistry Department, Durham University, South Road, Durham, DH1 3LE, UK
_publ_contact_author_email        andy.whiting@durham.ac.uk
_publ_contact_author_name         Andrew Whiting
_publ_contact_author_phone        ?
_publ_requested_journal           Beilstein J. Org. Chem.
_publ_section_references
;
Dolomanov, O.V., Bourhis, L.J., Gildea, R.J, Howard, J.A.K. & Puschmann, H.
 (2009), J. Appl. Cryst. 42, 339-341.

Sheldrick, G.M. (2015). Acta Cryst. A71, 3-8.

Sheldrick, G.M. (2015). Acta Cryst. C71, 3-8.
;
_chemical_name_common             ?
_chemical_name_systematic
4,4-Dimethyl-1-(propan-2-yl)-6-(tetramethyl-1,3,2-dioxaborolan-2-yl)-1,2,3,4-tetrahydroquinoline
_chemical_formula_moiety          'C20 H32 B N O2'
_chemical_formula_sum             'C20 H32 B N O2'
_chemical_formula_weight          329.27
_chemical_melting_point           ?
loop_
  _atom_type_symbol
  _atom_type_description
  _atom_type_scat_dispersion_real
  _atom_type_scat_dispersion_imag
  _atom_type_scat_source
 'C' 'C' 0.0033 0.0016 'International Tables Vol C Tables 4.2.6.8 and 6.1.1.4'
 'H' 'H' 0.0000 0.0000 'International Tables Vol C Tables 4.2.6.8 and 6.1.1.4'
 'B' 'B' 0.0013 0.0007 'International Tables Vol C Tables 4.2.6.8 and 6.1.1.4'
 'N' 'N' 0.0061 0.0033 'International Tables Vol C Tables 4.2.6.8 and 6.1.1.4'
 'O' 'O' 0.0106 0.0060 'International Tables Vol C Tables 4.2.6.8 and 6.1.1.4'

_shelx_space_group_comment
;
The symmetry employed for this shelxl refinement is uniquely defined
by the following loop, which should always be used as a source of
symmetry information in preference to the above space-group names.
They are only intended as comments.
;
_space_group_crystal_system       'monoclinic'
_space_group_IT_number            14
_space_group_name_H-M_alt         'P 1 21/c 1'
_space_group_name_Hall            '-P 2ybc'
loop_
  _space_group_symop_operation_xyz
 'x, y, z'
 '-x, y+1/2, -z+1/2'
 '-x, -y, -z'
 'x, -y-1/2, z-1/2'

_cell_length_a                    12.0435(6)
_cell_length_b                    11.5154(6)
_cell_length_c                    28.6939(14)
_cell_angle_alpha                 90
_cell_angle_beta                  96.039(2)
_cell_angle_gamma                 90
_cell_volume                      3957.4(3)
_cell_formula_units_Z             8
_cell_measurement_reflns_used     9808
_cell_measurement_temperature     120
_cell_measurement_theta_max       30.14
_cell_measurement_theta_min       2.27
_shelx_estimated_absorpt_T_max    0.986
_shelx_estimated_absorpt_T_min    0.979
_exptl_absorpt_coefficient_mu     0.069
_exptl_absorpt_correction_T_max   1.0000
_exptl_absorpt_correction_T_min   0.9287
_exptl_absorpt_correction_type    multi-scan
_exptl_absorpt_process_details
;
SADABS-2014/4 (Bruker,2014) was used for absorption correction.
wR2(int) was 0.0795 before and 0.0616 after correction.
The Ratio of minimum to maximum transmission is 0.9287.
The \l/2 correction factor is Not present.
;
_exptl_crystal_colour             'clear colourless'
_exptl_crystal_colour_lustre      clear
_exptl_crystal_colour_modifier    .
_exptl_crystal_colour_primary     colourless
_exptl_crystal_density_diffrn     1.105
_exptl_crystal_density_meas       ?
_exptl_crystal_density_method     ?
_exptl_crystal_description        block
_exptl_crystal_F_000              1440
_exptl_crystal_preparation        'Miyaura borylation'
_exptl_crystal_recrystallization_method
'Recrystallised from hexane by solvent evaporation'
_exptl_crystal_size_max           0.312
_exptl_crystal_size_mid           0.309
_exptl_crystal_size_min           0.204
_exptl_special_details
;
 ?
;
_exptl_transmission_factor_max    ?
_exptl_transmission_factor_min    ?
_diffrn_reflns_av_R_equivalents   0.0652
_diffrn_reflns_av_unetI/netI      0.0454
_diffrn_reflns_Laue_measured_fraction_full 1.000
_diffrn_reflns_Laue_measured_fraction_max 1.000
_diffrn_reflns_limit_h_max        15
_diffrn_reflns_limit_h_min        -15
_diffrn_reflns_limit_k_max        14
_diffrn_reflns_limit_k_min        -14
_diffrn_reflns_limit_l_max        37
_diffrn_reflns_limit_l_min        -37
_diffrn_reflns_number             70443
_diffrn_reflns_point_group_measured_fraction_full 1.000
_diffrn_reflns_point_group_measured_fraction_max 1.000
_diffrn_reflns_theta_full         26.000
_diffrn_reflns_theta_max          27.499
_diffrn_reflns_theta_min          1.907
_diffrn_ambient_temperature       120
_diffrn_detector                  'Bruker APEX2 area detector'
_diffrn_detector_area_resol_mean  7.9
_diffrn_detector_type             'CCD area detector'
_diffrn_measured_fraction_theta_full 1.000
_diffrn_measured_fraction_theta_max 1.000
_diffrn_measurement_device        'three-circle diffractometer'
_diffrn_measurement_device_type   'Bruker APEX-II CCD'
_diffrn_measurement_method        '\f and \w scans'
_diffrn_radiation_monochromator   'mirror optics'
_diffrn_radiation_probe           x-ray
_diffrn_radiation_type            MoK\a
_diffrn_radiation_wavelength      0.71073
_diffrn_source                    'microfocus sealed X-ray tube'
_diffrn_source_type               'Incoatec I\ms'
_diffrn_special_details           ?
_diffrn_standards_number          0
_reflns_Friedel_coverage          0.000
_reflns_Friedel_fraction_full     .
_reflns_Friedel_fraction_max      .
_reflns_number_gt                 6489
_reflns_number_total              9094
_reflns_special_details
;
 Reflections were merged by SHELXL according to the crystal
 class for the calculation of statistics and refinement.
 
 _reflns_Friedel_fraction is defined as the number of unique
 Friedel pairs measured divided by the number that would be
 possible theoretically, ignoring centric projections and
 systematic absences.
;
_reflns_threshold_expression      'I > 2\s(I)'
_computing_cell_refinement        'SAINT v8.34A (Bruker, 2013)'
_computing_data_collection        ?
_computing_data_reduction         'SAINT v8.34A (Bruker, 2013)'
_computing_molecular_graphics     'Olex2 (Dolomanov et al., 2009)'
_computing_publication_material   'Olex2 (Dolomanov et al., 2009)'
_computing_structure_refinement   'ShelXL (Sheldrick, 2015)'
_computing_structure_solution     'ShelXT (Sheldrick, 2015)'
_refine_diff_density_max          0.514
_refine_diff_density_min          -0.258
_refine_diff_density_rms          0.052
_refine_ls_extinction_coef        .
_refine_ls_extinction_method      none
_refine_ls_goodness_of_fit_ref    1.039
_refine_ls_hydrogen_treatment     constr
_refine_ls_matrix_type            full
_refine_ls_number_parameters      449
_refine_ls_number_reflns          9094
_refine_ls_number_restraints      0
_refine_ls_R_factor_all           0.0919
_refine_ls_R_factor_gt            0.0600
_refine_ls_restrained_S_all       1.039
_refine_ls_shift/su_max           0.001
_refine_ls_shift/su_mean          0.000
_refine_ls_structure_factor_coef  Fsqd
_refine_ls_weighting_details
'w=1/[\s^2^(Fo^2^)+(0.0574P)^2^+2.7605P] where P=(Fo^2^+2Fc^2^)/3'
_refine_ls_weighting_scheme       calc
_refine_ls_wR_factor_gt           0.1337
_refine_ls_wR_factor_ref          0.1484
_refine_special_details
;
 ?
;
_olex2_refinement_description
;
1. Fixed Uiso
 At 1.2 times of:
  All C(H) groups, All C(H,H) groups
 At 1.5 times of:
  All C(H,H,H) groups
2.a Ternary CH refined with riding coordinates:
 C8(H8), C32(H32)
2.b Secondary CH2 refined with riding coordinates:
 C11(H11A,H11B), C12(H12A,H12B), C35(H35A,H35B), C36(H36A,H36B)
2.c Aromatic/amide H refined with riding coordinates:
 C3(H3), C5(H5), C6(H6), C27(H27), C29(H29), C30(H30)
2.d Idealised Me refined as rotating group:
 C9(H9A,H9B,H9C), C10(H10A,H10B,H10C), C14(H14A,H14B,H14C), C15(H15A,H15B,
 H15C), C20(H20A,H20B,H20C), C21(H21A,H21B,H21C), C23(H23A,H23B,H23C), C24(H24A,
 H24B,H24C), C33(H33A,H33B,H33C), C34(H34A,H34B,H34C), C38(H38A,H38B,H38C),
 C39(H39A,H39B,H39C), C44(H44A,H44B,H44C), C45(H45A,H45B,H45C), C47(H47A,H47B,
 H47C), C48(H48A,H48B,H48C)
;
_atom_sites_solution_hydrogens    geom
_atom_sites_solution_primary      ?
_atom_sites_solution_secondary    ?
loop_
  _atom_site_label
  _atom_site_type_symbol
  _atom_site_fract_x
  _atom_site_fract_y
  _atom_site_fract_z
  _atom_site_U_iso_or_equiv
  _atom_site_adp_type
  _atom_site_occupancy
  _atom_site_site_symmetry_order
  _atom_site_calc_flag
  _atom_site_refinement_flags_posn
  _atom_site_refinement_flags_adp
  _atom_site_refinement_flags_occupancy
  _atom_site_disorder_assembly
  _atom_site_disorder_group
 O17 O 0.53574(11) 0.17992(11) 0.34420(5) 0.0242(3) Uani 1 1 d . . . A 1
 O18 O 0.49763(11) 0.28151(11) 0.40897(5) 0.0244(3) Uani 1 1 d . . . A 1
 N7 N 0.85135(12) 0.63611(12) 0.31540(5) 0.0178(3) Uani 1 1 d . . . A 1
 C1 C 0.78201(14) 0.55066(14) 0.32934(6) 0.0149(4) Uani 1 1 d . . . A 1
 C2 C 0.73598(14) 0.55832(15) 0.37288(6) 0.0163(4) Uani 1 1 d . . . A 1
 C3 C 0.66705(14) 0.47004(15) 0.38549(6) 0.0167(4) Uani 1 1 d . . . A 1
 H3 H 0.6386 0.4750 0.4151 0.020 Uiso 1 1 calc R . . A 1
 C4 C 0.63683(14) 0.37368(14) 0.35703(6) 0.0161(4) Uani 1 1 d . . . A 1
 C5 C 0.68045(15) 0.36988(15) 0.31433(6) 0.0187(4) Uani 1 1 d . . . A 1
 H5 H 0.6606 0.3069 0.2937 0.022 Uiso 1 1 calc R . . A 1
 C6 C 0.75184(15) 0.45431(15) 0.30057(6) 0.0185(4) Uani 1 1 d . . . A 1
 H6 H 0.7810 0.4472 0.2712 0.022 Uiso 1 1 calc R . . A 1
 C8 C 0.89875(15) 0.62790(15) 0.27046(6) 0.0178(4) Uani 1 1 d . . . A 1
 H8 H 0.8422 0.5881 0.2479 0.021 Uiso 1 1 calc R . . A 1
 C9 C 0.91963(17) 0.74724(17) 0.25018(7) 0.0270(4) Uani 1 1 d . . . A 1
 H9A H 0.8527 0.7953 0.2508 0.041 Uiso 1 1 calc GR . . A 1
 H9B H 0.9371 0.7388 0.2178 0.041 Uiso 1 1 calc GR . . A 1
 H9C H 0.9826 0.7844 0.2689 0.041 Uiso 1 1 calc GR . . A 1
 C10 C 1.00429(16) 0.55373(17) 0.27428(7) 0.0264(4) Uani 1 1 d . . . A 1
 H10A H 1.0629 0.5920 0.2951 0.040 Uiso 1 1 calc GR . . A 1
 H10B H 1.0296 0.5442 0.2431 0.040 Uiso 1 1 calc GR . . A 1
 H10C H 0.9882 0.4774 0.2871 0.040 Uiso 1 1 calc GR . . A 1
 C11 C 0.90529(16) 0.71949(17) 0.34869(7) 0.0247(4) Uani 1 1 d . . . . .
 H11A H 0.8779 0.7984 0.3399 0.030 Uiso 1 1 calc R . . A .
 H11B H 0.9868 0.7181 0.3465 0.030 Uiso 1 1 calc R . . A .
 C12 C 0.88450(17) 0.69600(19) 0.39836(7) 0.0307(5) Uani 1 1 d . . . B 1
 H12A H 0.9052 0.7657 0.4175 0.037 Uiso 1 1 calc R . . B 1
 H12B H 0.9332 0.6313 0.4107 0.037 Uiso 1 1 calc R . . B 1
 C13 C 0.76284(16) 0.66475(16) 0.40347(7) 0.0230(4) Uani 1 1 d . . . . .
 C14 C 0.7491(2) 0.6455(2) 0.45437(8) 0.0428(6) Uani 1 1 d . . . C 1
 H14A H 0.6708 0.6274 0.4578 0.064 Uiso 1 1 calc GR . . C 1
 H14B H 0.7710 0.7159 0.4722 0.064 Uiso 1 1 calc GR . . C 1
 H14C H 0.7964 0.5806 0.4663 0.064 Uiso 1 1 calc GR . . C 1
 C15 C 0.68564(19) 0.76587(18) 0.38477(9) 0.0388(6) Uani 1 1 d . . . D 1
 H15A H 0.6916 0.7769 0.3513 0.058 Uiso 1 1 calc GR . . D 1
 H15B H 0.7083 0.8373 0.4017 0.058 Uiso 1 1 calc GR . . D 1
 H15C H 0.6082 0.7473 0.3895 0.058 Uiso 1 1 calc GR . . D 1
 C19 C 0.43988(15) 0.12203(15) 0.36106(7) 0.0216(4) Uani 1 1 d . . . A 1
 C20 C 0.45476(18) -0.00754(17) 0.35655(9) 0.0380(6) Uani 1 1 d . . . A 1
 H20A H 0.4489 -0.0288 0.3233 0.057 Uiso 1 1 calc GR . . A 1
 H20B H 0.3967 -0.0479 0.3718 0.057 Uiso 1 1 calc GR . . A 1
 H20C H 0.5284 -0.0300 0.3716 0.057 Uiso 1 1 calc GR . . A 1
 C21 C 0.33781(17) 0.16188(18) 0.32989(8) 0.0319(5) Uani 1 1 d . . . A 1
 H21A H 0.3293 0.2461 0.3330 0.048 Uiso 1 1 calc GR . . A 1
 H21B H 0.2714 0.1228 0.3393 0.048 Uiso 1 1 calc GR . . A 1
 H21C H 0.3466 0.1426 0.2972 0.048 Uiso 1 1 calc GR . . A 1
 C22 C 0.44342(16) 0.16865(16) 0.41206(7) 0.0247(4) Uani 1 1 d . . . A 1
 C23 C 0.32983(19) 0.1868(2) 0.42908(8) 0.0406(6) Uani 1 1 d . . . A 1
 H23A H 0.3392 0.2163 0.4613 0.061 Uiso 1 1 calc GR . . A 1
 H23B H 0.2895 0.1127 0.4282 0.061 Uiso 1 1 calc GR . . A 1
 H23C H 0.2872 0.2431 0.4088 0.061 Uiso 1 1 calc GR . . A 1
 C24 C 0.5171(2) 0.0970(2) 0.44699(9) 0.0509(7) Uani 1 1 d . . . A 1
 H24A H 0.5899 0.0853 0.4354 0.076 Uiso 1 1 calc GR . . A 1
 H24B H 0.4819 0.0215 0.4511 0.076 Uiso 1 1 calc GR . . A 1
 H24C H 0.5273 0.1378 0.4771 0.076 Uiso 1 1 calc GR . . A 1
 B16 B 0.55660(16) 0.27797(17) 0.37093(7) 0.0171(4) Uani 1 1 d . . . A 1
 O41 O 0.00551(10) 0.99371(10) 0.43027(4) 0.0199(3) Uani 1 1 d . . . . .
 O42 O 0.03558(10) 1.09240(10) 0.36360(4) 0.0194(3) Uani 1 1 d . . . . .
 N31 N 0.31947(13) 0.61217(13) 0.33157(5) 0.0197(3) Uani 1 1 d . . . . .
 C25 C 0.26293(14) 0.70641(14) 0.34690(6) 0.0148(3) Uani 1 1 d . . . . .
 C26 C 0.23362(14) 0.71213(14) 0.39369(6) 0.0158(4) Uani 1 1 d . . . . .
 C27 C 0.17227(14) 0.80604(15) 0.40686(6) 0.0164(4) Uani 1 1 d . . . . .
 H27 H 0.1536 0.8089 0.4382 0.020 Uiso 1 1 calc R . . . .
 C28 C 0.13616(14) 0.89722(14) 0.37657(6) 0.0147(3) Uani 1 1 d . . . . .
 C29 C 0.16680(14) 0.89000(14) 0.33126(6) 0.0158(4) Uani 1 1 d . . . . .
 H29 H 0.1442 0.9500 0.3096 0.019 Uiso 1 1 calc R . . . .
 C30 C 0.22871(14) 0.79903(15) 0.31668(6) 0.0167(4) Uani 1 1 d . . . . .
 H30 H 0.2488 0.7987 0.2855 0.020 Uiso 1 1 calc R . . . .
 C32 C 0.35370(16) 0.60768(16) 0.28391(6) 0.0211(4) Uani 1 1 d . . . . .
 H32 H 0.2963 0.6510 0.2630 0.025 Uiso 1 1 calc R . . . .
 C33 C 0.46503(16) 0.66833(18) 0.28119(7) 0.0286(5) Uani 1 1 d . . . . .
 H33A H 0.4608 0.7479 0.2930 0.043 Uiso 1 1 calc GR . . . .
 H33B H 0.4820 0.6702 0.2485 0.043 Uiso 1 1 calc GR . . . .
 H33C H 0.5240 0.6259 0.3003 0.043 Uiso 1 1 calc GR . . . .
 C34 C 0.3560(2) 0.48373(18) 0.26557(8) 0.0351(5) Uani 1 1 d . . . . .
 H34A H 0.4173 0.4411 0.2830 0.053 Uiso 1 1 calc GR . . . .
 H34B H 0.3671 0.4849 0.2322 0.053 Uiso 1 1 calc GR . . . .
 H34C H 0.2850 0.4454 0.2696 0.053 Uiso 1 1 calc GR . . . .
 C35 C 0.37335(18) 0.52807(18) 0.36450(7) 0.0305(5) Uani 1 1 d . . . . .
 H35A H 0.4496 0.5124 0.3562 0.037 Uiso 1 1 calc R . . . .
 H35B H 0.3311 0.4542 0.3616 0.037 Uiso 1 1 calc R . . . .
 C36 C 0.38053(17) 0.56856(18) 0.41449(7) 0.0288(5) Uani 1 1 d . . . . .
 H36A H 0.4370 0.6311 0.4193 0.035 Uiso 1 1 calc R . . . .
 H36B H 0.4054 0.5033 0.4355 0.035 Uiso 1 1 calc R . . . .
 C37 C 0.26851(16) 0.61377(15) 0.42745(6) 0.0206(4) Uani 1 1 d . . . . .
 C38 C 0.18033(18) 0.51692(17) 0.42203(8) 0.0313(5) Uani 1 1 d . . . . .
 H38A H 0.1114 0.5443 0.4337 0.047 Uiso 1 1 calc GR . . . .
 H38B H 0.2082 0.4487 0.4400 0.047 Uiso 1 1 calc GR . . . .
 H38C H 0.1651 0.4960 0.3889 0.047 Uiso 1 1 calc GR . . . .
 C39 C 0.2833(2) 0.65364(19) 0.47855(7) 0.0366(5) Uani 1 1 d . . . . .
 H39A H 0.3339 0.7205 0.4817 0.055 Uiso 1 1 calc GR . . . .
 H39B H 0.3148 0.5901 0.4985 0.055 Uiso 1 1 calc GR . . . .
 H39C H 0.2106 0.6760 0.4882 0.055 Uiso 1 1 calc GR . . . .
 C43 C -0.05076(15) 1.10552(15) 0.43311(6) 0.0194(4) Uani 1 1 d . . . . .
 C44 C -0.16152(16) 1.08525(18) 0.45245(7) 0.0287(5) Uani 1 1 d . . . . .
 H44A H -0.2034 1.0251 0.4340 0.043 Uiso 1 1 calc GR . . . .
 H44B H -0.2047 1.1576 0.4507 0.043 Uiso 1 1 calc GR . . . .
 H44C H -0.1481 1.0600 0.4852 0.043 Uiso 1 1 calc GR . . . .
 C45 C 0.02404(17) 1.18092(17) 0.46677(7) 0.0274(4) Uani 1 1 d . . . . .
 H45A H 0.0378 1.1416 0.4971 0.041 Uiso 1 1 calc GR . . . .
 H45B H -0.0127 1.2556 0.4709 0.041 Uiso 1 1 calc GR . . . .
 H45C H 0.0952 1.1942 0.4539 0.041 Uiso 1 1 calc GR . . . .
 C46 C -0.06029(15) 1.14844(15) 0.38134(6) 0.0192(4) Uani 1 1 d . . . . .
 C47 C -0.16309(16) 1.10249(18) 0.35183(7) 0.0278(4) Uani 1 1 d . . . . .
 H47A H -0.2300 1.1392 0.3619 0.042 Uiso 1 1 calc GR . . . .
 H47B H -0.1678 1.0182 0.3558 0.042 Uiso 1 1 calc GR . . . .
 H47C H -0.1577 1.1204 0.3188 0.042 Uiso 1 1 calc GR . . . .
 C48 C -0.05020(17) 1.27873(16) 0.37581(8) 0.0278(4) Uani 1 1 d . . . . .
 H48A H 0.0221 1.3048 0.3911 0.042 Uiso 1 1 calc GR . . . .
 H48B H -0.1104 1.3173 0.3903 0.042 Uiso 1 1 calc GR . . . .
 H48C H -0.0558 1.2984 0.3424 0.042 Uiso 1 1 calc GR . . . .
 B40 B 0.05980(16) 0.99563(17) 0.39065(7) 0.0155(4) Uani 1 1 d . . . . .

loop_
  _atom_site_aniso_label
  _atom_site_aniso_U_11
  _atom_site_aniso_U_22
  _atom_site_aniso_U_33
  _atom_site_aniso_U_23
  _atom_site_aniso_U_13
  _atom_site_aniso_U_12
 O17 0.0235(7) 0.0171(6) 0.0341(8) -0.0054(6) 0.0125(6) -0.0084(5)
 O18 0.0291(7) 0.0206(7) 0.0250(7) -0.0027(5) 0.0093(6) -0.0110(6)
 N7 0.0220(8) 0.0141(7) 0.0175(8) -0.0028(6) 0.0034(6) -0.0063(6)
 C1 0.0147(8) 0.0120(8) 0.0174(9) 0.0000(7) -0.0012(7) -0.0010(7)
 C2 0.0151(8) 0.0153(8) 0.0179(9) -0.0022(7) -0.0006(7) 0.0000(7)
 C3 0.0170(9) 0.0169(8) 0.0160(9) -0.0004(7) 0.0012(7) 0.0011(7)
 C4 0.0145(8) 0.0129(8) 0.0206(9) 0.0013(7) 0.0007(7) 0.0006(7)
 C5 0.0198(9) 0.0127(8) 0.0232(10) -0.0050(7) 0.0009(7) -0.0035(7)
 C6 0.0220(9) 0.0171(9) 0.0168(9) -0.0034(7) 0.0038(7) -0.0043(7)
 C8 0.0219(9) 0.0161(8) 0.0157(9) -0.0002(7) 0.0028(7) -0.0061(7)
 C9 0.0345(11) 0.0213(10) 0.0252(10) 0.0053(8) 0.0030(8) -0.0078(8)
 C10 0.0278(10) 0.0220(10) 0.0304(11) -0.0026(8) 0.0066(8) -0.0028(8)
 C11 0.0268(10) 0.0217(10) 0.0258(10) -0.0083(8) 0.0041(8) -0.0115(8)
 C12 0.0324(11) 0.0320(11) 0.0279(11) -0.0098(9) 0.0035(9) -0.0134(9)
 C13 0.0253(10) 0.0219(9) 0.0224(10) -0.0084(8) 0.0057(8) -0.0085(8)
 C14 0.0536(15) 0.0467(14) 0.0299(12) -0.0155(11) 0.0127(11) -0.0246(12)
 C15 0.0377(13) 0.0228(11) 0.0559(15) -0.0124(10) 0.0054(11) -0.0004(9)
 C19 0.0173(9) 0.0161(9) 0.0322(11) 0.0013(8) 0.0070(8) -0.0044(7)
 C20 0.0292(12) 0.0179(10) 0.0692(17) -0.0047(10) 0.0158(11) -0.0058(9)
 C21 0.0288(11) 0.0292(11) 0.0364(12) 0.0045(9) -0.0031(9) -0.0118(9)
 C22 0.0259(10) 0.0220(10) 0.0266(10) 0.0029(8) 0.0048(8) -0.0106(8)
 C23 0.0388(13) 0.0433(14) 0.0437(14) -0.0116(11) 0.0229(11) -0.0179(11)
 C24 0.0481(15) 0.0525(15) 0.0481(15) 0.0295(13) -0.0138(12) -0.0240(12)
 B16 0.0147(9) 0.0136(9) 0.0222(11) 0.0018(8) -0.0011(8) 0.0012(8)
 O41 0.0238(7) 0.0155(6) 0.0210(7) 0.0003(5) 0.0054(5) 0.0045(5)
 O42 0.0203(6) 0.0156(6) 0.0231(7) 0.0015(5) 0.0061(5) 0.0063(5)
 N31 0.0237(8) 0.0159(7) 0.0200(8) 0.0023(6) 0.0046(6) 0.0074(6)
 C25 0.0129(8) 0.0129(8) 0.0185(9) 0.0000(7) 0.0001(7) -0.0001(6)
 C26 0.0154(8) 0.0130(8) 0.0184(9) 0.0006(7) -0.0013(7) -0.0007(7)
 C27 0.0176(9) 0.0159(8) 0.0156(9) -0.0013(7) 0.0012(7) -0.0016(7)
 C28 0.0133(8) 0.0113(8) 0.0191(9) -0.0008(7) 0.0000(7) -0.0012(6)
 C29 0.0145(8) 0.0123(8) 0.0202(9) 0.0033(7) -0.0006(7) 0.0004(7)
 C30 0.0192(9) 0.0151(8) 0.0159(9) 0.0014(7) 0.0027(7) 0.0003(7)
 C32 0.0245(10) 0.0186(9) 0.0202(9) -0.0012(7) 0.0023(7) 0.0069(8)
 C33 0.0272(11) 0.0329(11) 0.0265(11) 0.0004(9) 0.0066(8) 0.0034(9)
 C34 0.0441(13) 0.0255(11) 0.0360(12) -0.0090(9) 0.0055(10) 0.0070(10)
 C35 0.0367(12) 0.0240(10) 0.0323(11) 0.0091(9) 0.0103(9) 0.0179(9)
 C36 0.0278(11) 0.0294(11) 0.0283(11) 0.0108(9) -0.0010(8) 0.0116(9)
 C37 0.0271(10) 0.0163(9) 0.0178(9) 0.0025(7) 0.0004(8) 0.0048(8)
 C38 0.0370(12) 0.0190(10) 0.0382(12) 0.0088(9) 0.0053(10) 0.0010(9)
 C39 0.0580(15) 0.0284(11) 0.0216(11) 0.0034(9) -0.0041(10) 0.0122(10)
 C43 0.0197(9) 0.0153(8) 0.0237(10) -0.0032(7) 0.0038(7) 0.0022(7)
 C44 0.0267(11) 0.0257(10) 0.0357(12) -0.0047(9) 0.0127(9) 0.0004(8)
 C45 0.0286(11) 0.0266(10) 0.0266(11) -0.0079(8) 0.0005(8) 0.0026(8)
 C46 0.0189(9) 0.0155(8) 0.0237(10) -0.0024(7) 0.0040(7) 0.0054(7)
 C47 0.0238(10) 0.0282(10) 0.0299(11) -0.0050(9) -0.0040(8) 0.0103(8)
 C48 0.0312(11) 0.0170(9) 0.0361(12) 0.0021(8) 0.0074(9) 0.0071(8)
 B40 0.0140(9) 0.0135(9) 0.0186(10) -0.0016(8) -0.0003(8) -0.0016(7)

_geom_special_details
;
 All esds (except the esd in the dihedral angle between two l.s. planes)
 are estimated using the full covariance matrix.  The cell esds are taken
 into account individually in the estimation of esds in distances, angles
 and torsion angles; correlations between esds in cell parameters are only
 used when they are defined by crystal symmetry.  An approximate (isotropic)
 treatment of cell esds is used for estimating esds involving l.s. planes.
;
loop_
  _geom_bond_atom_site_label_1
  _geom_bond_atom_site_label_2
  _geom_bond_distance
  _geom_bond_site_symmetry_2
  _geom_bond_publ_flag
 O17 C19 1.459(2) . ?
 O17 B16 1.373(2) . ?
 O18 C22 1.461(2) . ?
 O18 B16 1.364(2) . ?
 N7 C1 1.377(2) . ?
 N7 C8 1.467(2) . ?
 N7 C11 1.458(2) . ?
 C1 C2 1.422(2) . ?
 C1 C6 1.408(2) . ?
 C2 C3 1.384(2) . ?
 C2 C13 1.522(2) . ?
 C3 H3 0.9500 . ?
 C3 C4 1.403(2) . ?
 C4 C5 1.384(3) . ?
 C4 B16 1.546(3) . ?
 C5 H5 0.9500 . ?
 C5 C6 1.383(2) . ?
 C6 H6 0.9500 . ?
 C8 H8 1.0000 . ?
 C8 C9 1.524(2) . ?
 C8 C10 1.526(3) . ?
 C9 H9A 0.9800 . ?
 C9 H9B 0.9800 . ?
 C9 H9C 0.9800 . ?
 C10 H10A 0.9800 . ?
 C10 H10B 0.9800 . ?
 C10 H10C 0.9800 . ?
 C11 H11A 0.9900 . ?
 C11 H11B 0.9900 . ?
 C11 C12 1.497(3) . ?
 C12 H12A 0.9900 . ?
 C12 H12B 0.9900 . ?
 C12 C13 1.531(3) . ?
 C13 C14 1.504(3) . ?
 C13 C15 1.550(3) . ?
 C14 H14A 0.9800 . ?
 C14 H14B 0.9800 . ?
 C14 H14C 0.9800 . ?
 C15 H15A 0.9800 . ?
 C15 H15B 0.9800 . ?
 C15 H15C 0.9800 . ?
 C19 C20 1.510(3) . ?
 C19 C21 1.513(3) . ?
 C19 C22 1.555(3) . ?
 C20 H20A 0.9800 . ?
 C20 H20B 0.9800 . ?
 C20 H20C 0.9800 . ?
 C21 H21A 0.9800 . ?
 C21 H21B 0.9800 . ?
 C21 H21C 0.9800 . ?
 C22 C23 1.515(3) . ?
 C22 C24 1.512(3) . ?
 C23 H23A 0.9800 . ?
 C23 H23B 0.9800 . ?
 C23 H23C 0.9800 . ?
 C24 H24A 0.9800 . ?
 C24 H24B 0.9800 . ?
 C24 H24C 0.9800 . ?
 O41 C43 1.461(2) . ?
 O41 B40 1.370(2) . ?
 O42 C46 1.460(2) . ?
 O42 B40 1.372(2) . ?
 N31 C25 1.378(2) . ?
 N31 C32 1.470(2) . ?
 N31 C35 1.457(2) . ?
 C25 C26 1.425(2) . ?
 C25 C30 1.409(2) . ?
 C26 C27 1.385(2) . ?
 C26 C37 1.521(2) . ?
 C27 H27 0.9500 . ?
 C27 C28 1.403(2) . ?
 C28 C29 1.391(2) . ?
 C28 B40 1.540(3) . ?
 C29 H29 0.9500 . ?
 C29 C30 1.376(2) . ?
 C30 H30 0.9500 . ?
 C32 H32 1.0000 . ?
 C32 C33 1.521(3) . ?
 C32 C34 1.522(3) . ?
 C33 H33A 0.9800 . ?
 C33 H33B 0.9800 . ?
 C33 H33C 0.9800 . ?
 C34 H34A 0.9800 . ?
 C34 H34B 0.9800 . ?
 C34 H34C 0.9800 . ?
 C35 H35A 0.9900 . ?
 C35 H35B 0.9900 . ?
 C35 C36 1.502(3) . ?
 C36 H36A 0.9900 . ?
 C36 H36B 0.9900 . ?
 C36 C37 1.528(3) . ?
 C37 C38 1.537(3) . ?
 C37 C39 1.529(3) . ?
 C38 H38A 0.9800 . ?
 C38 H38B 0.9800 . ?
 C38 H38C 0.9800 . ?
 C39 H39A 0.9800 . ?
 C39 H39B 0.9800 . ?
 C39 H39C 0.9800 . ?
 C43 C44 1.516(3) . ?
 C43 C45 1.522(3) . ?
 C43 C46 1.558(3) . ?
 C44 H44A 0.9800 . ?
 C44 H44B 0.9800 . ?
 C44 H44C 0.9800 . ?
 C45 H45A 0.9800 . ?
 C45 H45B 0.9800 . ?
 C45 H45C 0.9800 . ?
 C46 C47 1.520(3) . ?
 C46 C48 1.515(2) . ?
 C47 H47A 0.9800 . ?
 C47 H47B 0.9800 . ?
 C47 H47C 0.9800 . ?
 C48 H48A 0.9800 . ?
 C48 H48B 0.9800 . ?
 C48 H48C 0.9800 . ?

loop_
  _geom_angle_atom_site_label_1
  _geom_angle_atom_site_label_2
  _geom_angle_atom_site_label_3
  _geom_angle
  _geom_angle_site_symmetry_1
  _geom_angle_site_symmetry_3
  _geom_angle_publ_flag
 B16 O17 C19 107.16(14) . . ?
 B16 O18 C22 107.19(14) . . ?
 C1 N7 C8 120.88(14) . . ?
 C1 N7 C11 121.49(14) . . ?
 C11 N7 C8 115.50(14) . . ?
 N7 C1 C2 121.03(15) . . ?
 N7 C1 C6 121.33(15) . . ?
 C6 C1 C2 117.62(15) . . ?
 C1 C2 C13 118.53(15) . . ?
 C3 C2 C1 118.95(15) . . ?
 C3 C2 C13 122.51(16) . . ?
 C2 C3 H3 118.2 . . ?
 C2 C3 C4 123.68(16) . . ?
 C4 C3 H3 118.2 . . ?
 C3 C4 B16 123.01(16) . . ?
 C5 C4 C3 116.17(15) . . ?
 C5 C4 B16 120.79(16) . . ?
 C4 C5 H5 118.8 . . ?
 C6 C5 C4 122.41(16) . . ?
 C6 C5 H5 118.8 . . ?
 C1 C6 H6 119.4 . . ?
 C5 C6 C1 121.11(16) . . ?
 C5 C6 H6 119.4 . . ?
 N7 C8 H8 107.2 . . ?
 N7 C8 C9 111.88(15) . . ?
 N7 C8 C10 111.80(15) . . ?
 C9 C8 H8 107.2 . . ?
 C9 C8 C10 111.26(15) . . ?
 C10 C8 H8 107.2 . . ?
 C8 C9 H9A 109.5 . . ?
 C8 C9 H9B 109.5 . . ?
 C8 C9 H9C 109.5 . . ?
 H9A C9 H9B 109.5 . . ?
 H9A C9 H9C 109.5 . . ?
 H9B C9 H9C 109.5 . . ?
 C8 C10 H10A 109.5 . . ?
 C8 C10 H10B 109.5 . . ?
 C8 C10 H10C 109.5 . . ?
 H10A C10 H10B 109.5 . . ?
 H10A C10 H10C 109.5 . . ?
 H10B C10 H10C 109.5 . . ?
 N7 C11 H11A 108.9 . . ?
 N7 C11 H11B 108.9 . . ?
 N7 C11 C12 113.39(15) . . ?
 H11A C11 H11B 107.7 . . ?
 C12 C11 H11A 108.9 . . ?
 C12 C11 H11B 108.9 . . ?
 C11 C12 H12A 109.0 . . ?
 C11 C12 H12B 109.0 . . ?
 C11 C12 C13 113.03(17) . . ?
 H12A C12 H12B 107.8 . . ?
 C13 C12 H12A 109.0 . . ?
 C13 C12 H12B 109.0 . . ?
 C2 C13 C12 106.35(15) . . ?
 C2 C13 C15 108.77(15) . . ?
 C12 C13 C15 109.61(17) . . ?
 C14 C13 C2 113.76(16) . . ?
 C14 C13 C12 109.40(17) . . ?
 C14 C13 C15 108.88(18) . . ?
 C13 C14 H14A 109.5 . . ?
 C13 C14 H14B 109.5 . . ?
 C13 C14 H14C 109.5 . . ?
 H14A C14 H14B 109.5 . . ?
 H14A C14 H14C 109.5 . . ?
 H14B C14 H14C 109.5 . . ?
 C13 C15 H15A 109.5 . . ?
 C13 C15 H15B 109.5 . . ?
 C13 C15 H15C 109.5 . . ?
 H15A C15 H15B 109.5 . . ?
 H15A C15 H15C 109.5 . . ?
 H15B C15 H15C 109.5 . . ?
 O17 C19 C20 108.53(15) . . ?
 O17 C19 C21 106.70(15) . . ?
 O17 C19 C22 102.12(14) . . ?
 C20 C19 C21 110.20(17) . . ?
 C20 C19 C22 115.48(17) . . ?
 C21 C19 C22 113.05(16) . . ?
 C19 C20 H20A 109.5 . . ?
 C19 C20 H20B 109.5 . . ?
 C19 C20 H20C 109.5 . . ?
 H20A C20 H20B 109.5 . . ?
 H20A C20 H20C 109.5 . . ?
 H20B C20 H20C 109.5 . . ?
 C19 C21 H21A 109.5 . . ?
 C19 C21 H21B 109.5 . . ?
 C19 C21 H21C 109.5 . . ?
 H21A C21 H21B 109.5 . . ?
 H21A C21 H21C 109.5 . . ?
 H21B C21 H21C 109.5 . . ?
 O18 C22 C19 102.60(14) . . ?
 O18 C22 C23 108.75(16) . . ?
 O18 C22 C24 106.90(16) . . ?
 C23 C22 C19 114.51(17) . . ?
 C24 C22 C19 113.05(19) . . ?
 C24 C22 C23 110.39(19) . . ?
 C22 C23 H23A 109.5 . . ?
 C22 C23 H23B 109.5 . . ?
 C22 C23 H23C 109.5 . . ?
 H23A C23 H23B 109.5 . . ?
 H23A C23 H23C 109.5 . . ?
 H23B C23 H23C 109.5 . . ?
 C22 C24 H24A 109.5 . . ?
 C22 C24 H24B 109.5 . . ?
 C22 C24 H24C 109.5 . . ?
 H24A C24 H24B 109.5 . . ?
 H24A C24 H24C 109.5 . . ?
 H24B C24 H24C 109.5 . . ?
 O17 B16 C4 121.65(16) . . ?
 O18 B16 O17 113.05(16) . . ?
 O18 B16 C4 125.28(16) . . ?
 B40 O41 C43 107.26(13) . . ?
 B40 O42 C46 106.90(13) . . ?
 C25 N31 C32 121.40(14) . . ?
 C25 N31 C35 121.20(15) . . ?
 C35 N31 C32 115.50(14) . . ?
 N31 C25 C26 121.12(15) . . ?
 N31 C25 C30 121.49(15) . . ?
 C30 C25 C26 117.36(15) . . ?
 C25 C26 C37 119.11(15) . . ?
 C27 C26 C25 119.04(15) . . ?
 C27 C26 C37 121.84(16) . . ?
 C26 C27 H27 118.1 . . ?
 C26 C27 C28 123.72(16) . . ?
 C28 C27 H27 118.1 . . ?
 C27 C28 B40 122.90(16) . . ?
 C29 C28 C27 116.04(15) . . ?
 C29 C28 B40 120.91(15) . . ?
 C28 C29 H29 118.8 . . ?
 C30 C29 C28 122.36(16) . . ?
 C30 C29 H29 118.8 . . ?
 C25 C30 H30 119.3 . . ?
 C29 C30 C25 121.46(16) . . ?
 C29 C30 H30 119.3 . . ?
 N31 C32 H32 107.3 . . ?
 N31 C32 C33 111.50(15) . . ?
 N31 C32 C34 111.81(16) . . ?
 C33 C32 H32 107.3 . . ?
 C33 C32 C34 111.38(16) . . ?
 C34 C32 H32 107.3 . . ?
 C32 C33 H33A 109.5 . . ?
 C32 C33 H33B 109.5 . . ?
 C32 C33 H33C 109.5 . . ?
 H33A C33 H33B 109.5 . . ?
 H33A C33 H33C 109.5 . . ?
 H33B C33 H33C 109.5 . . ?
 C32 C34 H34A 109.5 . . ?
 C32 C34 H34B 109.5 . . ?
 C32 C34 H34C 109.5 . . ?
 H34A C34 H34B 109.5 . . ?
 H34A C34 H34C 109.5 . . ?
 H34B C34 H34C 109.5 . . ?
 N31 C35 H35A 109.0 . . ?
 N31 C35 H35B 109.0 . . ?
 N31 C35 C36 112.95(16) . . ?
 H35A C35 H35B 107.8 . . ?
 C36 C35 H35A 109.0 . . ?
 C36 C35 H35B 109.0 . . ?
 C35 C36 H36A 109.2 . . ?
 C35 C36 H36B 109.2 . . ?
 C35 C36 C37 111.99(16) . . ?
 H36A C36 H36B 107.9 . . ?
 C37 C36 H36A 109.2 . . ?
 C37 C36 H36B 109.2 . . ?
 C26 C37 C36 106.90(15) . . ?
 C26 C37 C38 109.54(15) . . ?
 C26 C37 C39 112.56(15) . . ?
 C36 C37 C38 110.28(16) . . ?
 C36 C37 C39 108.61(16) . . ?
 C39 C37 C38 108.92(17) . . ?
 C37 C38 H38A 109.5 . . ?
 C37 C38 H38B 109.5 . . ?
 C37 C38 H38C 109.5 . . ?
 H38A C38 H38B 109.5 . . ?
 H38A C38 H38C 109.5 . . ?
 H38B C38 H38C 109.5 . . ?
 C37 C39 H39A 109.5 . . ?
 C37 C39 H39B 109.5 . . ?
 C37 C39 H39C 109.5 . . ?
 H39A C39 H39B 109.5 . . ?
 H39A C39 H39C 109.5 . . ?
 H39B C39 H39C 109.5 . . ?
 O41 C43 C44 108.42(15) . . ?
 O41 C43 C45 106.92(14) . . ?
 O41 C43 C46 102.38(13) . . ?
 C44 C43 C45 109.90(16) . . ?
 C44 C43 C46 114.75(16) . . ?
 C45 C43 C46 113.79(15) . . ?
 C43 C44 H44A 109.5 . . ?
 C43 C44 H44B 109.5 . . ?
 C43 C44 H44C 109.5 . . ?
 H44A C44 H44B 109.5 . . ?
 H44A C44 H44C 109.5 . . ?
 H44B C44 H44C 109.5 . . ?
 C43 C45 H45A 109.5 . . ?
 C43 C45 H45B 109.5 . . ?
 C43 C45 H45C 109.5 . . ?
 H45A C45 H45B 109.5 . . ?
 H45A C45 H45C 109.5 . . ?
 H45B C45 H45C 109.5 . . ?
 O42 C46 C43 102.15(13) . . ?
 O42 C46 C47 106.24(14) . . ?
 O42 C46 C48 109.04(15) . . ?
 C47 C46 C43 113.25(16) . . ?
 C48 C46 C43 114.54(16) . . ?
 C48 C46 C47 110.86(16) . . ?
 C46 C47 H47A 109.5 . . ?
 C46 C47 H47B 109.5 . . ?
 C46 C47 H47C 109.5 . . ?
 H47A C47 H47B 109.5 . . ?
 H47A C47 H47C 109.5 . . ?
 H47B C47 H47C 109.5 . . ?
 C46 C48 H48A 109.5 . . ?
 C46 C48 H48B 109.5 . . ?
 C46 C48 H48C 109.5 . . ?
 H48A C48 H48B 109.5 . . ?
 H48A C48 H48C 109.5 . . ?
 H48B C48 H48C 109.5 . . ?
 O41 B40 O42 113.02(15) . . ?
 O41 B40 C28 123.79(16) . . ?
 O42 B40 C28 123.14(16) . . ?

loop_
  _geom_torsion_atom_site_label_1
  _geom_torsion_atom_site_label_2
  _geom_torsion_atom_site_label_3
  _geom_torsion_atom_site_label_4
  _geom_torsion
  _geom_torsion_site_symmetry_1
  _geom_torsion_site_symmetry_2
  _geom_torsion_site_symmetry_3
  _geom_torsion_site_symmetry_4
  _geom_torsion_publ_flag
 O17 C19 C22 O18 27.49(17) . . . . ?
 O17 C19 C22 C23 145.13(17) . . . . ?
 O17 C19 C22 C24 -87.27(18) . . . . ?
 N7 C1 C2 C3 -179.74(16) . . . . ?
 N7 C1 C2 C13 1.4(2) . . . . ?
 N7 C1 C6 C5 -178.73(16) . . . . ?
 N7 C11 C12 C13 -43.5(2) . . . . ?
 C1 N7 C8 C9 150.59(16) . . . . ?
 C1 N7 C8 C10 -83.86(19) . . . . ?
 C1 N7 C11 C12 4.5(3) . . . . ?
 C1 C2 C3 C4 -1.9(3) . . . . ?
 C1 C2 C13 C12 -37.4(2) . . . . ?
 C1 C2 C13 C14 -157.88(18) . . . . ?
 C1 C2 C13 C15 80.6(2) . . . . ?
 C2 C1 C6 C5 -0.3(3) . . . . ?
 C2 C3 C4 C5 0.2(3) . . . . ?
 C2 C3 C4 B16 -177.88(16) . . . . ?
 C3 C2 C13 C12 143.76(17) . . . . ?
 C3 C2 C13 C14 23.3(3) . . . . ?
 C3 C2 C13 C15 -98.3(2) . . . . ?
 C3 C4 C5 C6 1.4(3) . . . . ?
 C3 C4 B16 O17 -174.55(16) . . . . ?
 C3 C4 B16 O18 7.3(3) . . . . ?
 C4 C5 C6 C1 -1.4(3) . . . . ?
 C5 C4 B16 O17 7.4(3) . . . . ?
 C5 C4 B16 O18 -170.68(17) . . . . ?
 C6 C1 C2 C3 1.9(2) . . . . ?
 C6 C1 C2 C13 -177.01(16) . . . . ?
 C8 N7 C1 C2 179.97(15) . . . . ?
 C8 N7 C1 C6 -1.7(2) . . . . ?
 C8 N7 C11 C12 -159.02(16) . . . . ?
 C11 N7_a C1_a C6_a -164.37(17) . . . . ?
 C11 N7 C1 C2 17.3(2) . . . . ?
 C11 N7 C8 C9 -45.8(2) . . . . ?
 C11 N7 C8 C10 79.79(19) . . . . ?
 C11 C12 C13 C2 58.1(2) . . . . ?
 C11 C12 C13 C14 -178.65(18) . . . . ?
 C11 C12 C13 C15 -59.3(2) . . . . ?
 C13 C2 C3 C4 176.98(17) . . . . ?
 C19 O17 B16 O18 10.7(2) . . . . ?
 C19 O17 B16 C4 -167.66(16) . . . . ?
 C20 C19 C22 O18 145.03(16) . . . . ?
 C20 C19 C22 C23 -97.3(2) . . . . ?
 C20 C19 C22 C24 30.3(2) . . . . ?
 C21 C19 C22 O18 -86.77(18) . . . . ?
 C21 C19 C22 C23 30.9(2) . . . . ?
 C21 C19 C22 C24 158.47(17) . . . . ?
 C22 O18 B16 O17 8.4(2) . . . . ?
 C22 O18 B16 C4 -173.36(17) . . . . ?
 B16 O17 C19 C20 -145.90(18) . . . . ?
 B16 O17 C19 C21 95.36(17) . . . . ?
 B16 O17 C19 C22 -23.49(18) . . . . ?
 B16 O18 C22 C19 -22.28(18) . . . . ?
 B16 O18 C22 C23 -143.93(17) . . . . ?
 B16 O18 C22 C24 96.9(2) . . . . ?
 B16 C4 C5 C6 179.56(16) . . . . ?
 O41 C43 C46 O42 -28.10(16) . . . . ?
 O41 C43 C46 C47 85.72(17) . . . . ?
 O41 C43 C46 C48 -145.81(15) . . . . ?
 N31 C25 C26 C27 -177.02(16) . . . . ?
 N31 C25 C26 C37 1.7(2) . . . . ?
 N31 C25 C30 C29 176.30(16) . . . . ?
 N31 C35 C36 C37 49.1(2) . . . . ?
 C25 N31 C32 C33 85.1(2) . . . . ?
 C25 N31 C32 C34 -149.51(17) . . . . ?
 C25 N31 C35 C36 -12.0(3) . . . . ?
 C25 C26 C27 C28 0.2(3) . . . . ?
 C25 C26 C37 C36 33.3(2) . . . . ?
 C25 C26 C37 C38 -86.2(2) . . . . ?
 C25 C26 C37 C39 152.45(17) . . . . ?
 C26 C25 C30 C29 -1.7(2) . . . . ?
 C26 C27 C28 C29 -0.8(2) . . . . ?
 C26 C27 C28 B40 174.75(16) . . . . ?
 C27 C26 C37 C36 -148.00(17) . . . . ?
 C27 C26 C37 C38 92.5(2) . . . . ?
 C27 C26 C37 C39 -28.8(2) . . . . ?
 C27 C28 C29 C30 0.1(2) . . . . ?
 C27 C28 B40 O41 -11.3(3) . . . . ?
 C27 C28 B40 O42 171.53(16) . . . . ?
 C28 C29 C30 C25 1.2(3) . . . . ?
 C29 C28 B40 O41 164.11(16) . . . . ?
 C29 C28 B40 O42 -13.1(3) . . . . ?
 C30 C25 C26 C27 1.0(2) . . . . ?
 C30 C25 C26 C37 179.78(15) . . . . ?
 C32 N31 C25 C26 -177.65(16) . . . . ?
 C32 N31 C25 C30 4.4(3) . . . . ?
 C32 N31 C35 C36 152.57(17) . . . . ?
 C35 N31 C25 C26 -14.0(3) . . . . ?
 C35 N31 C25 C30 167.99(17) . . . . ?
 C35 N31 C32 C33 -79.4(2) . . . . ?
 C35 N31 C32 C34 46.0(2) . . . . ?
 C35 C36 C37 C26 -58.0(2) . . . . ?
 C35 C36 C37 C38 61.0(2) . . . . ?
 C35 C36 C37 C39 -179.69(17) . . . . ?
 C37 C26 C27 C28 -178.47(16) . . . . ?
 C43 O41 B40 O42 -6.94(19) . . . . ?
 C43 O41 B40 C28 175.60(16) . . . . ?
 C44 C43 C46 O42 -145.32(15) . . . . ?
 C44 C43 C46 C47 -31.5(2) . . . . ?
 C44 C43 C46 C48 96.97(19) . . . . ?
 C45 C43 C46 O42 86.89(17) . . . . ?
 C45 C43 C46 C47 -159.29(15) . . . . ?
 C45 C43 C46 C48 -30.8(2) . . . . ?
 C46 O42 B40 O41 -12.53(19) . . . . ?
 C46 O42 B40 C28 164.95(16) . . . . ?
 B40 O41 C43 C44 143.45(16) . . . . ?
 B40 O41 C43 C45 -98.10(17) . . . . ?
 B40 O41 C43 C46 21.80(17) . . . . ?
 B40 O42 C46 C43 24.93(17) . . . . ?
 B40 O42 C46 C47 -93.96(17) . . . . ?
 B40 O42 C46 C48 146.51(16) . . . . ?
 B40 C28 C29 C30 -175.57(16) . . . . ?

_shelx_res_file
;
TITL mo_dc350_0m_a.res in P2(1)/c
REM Old TITL mo_DC350_0m in P21/c #14
REM SHELXT solution in P2(1)/c
REM R1 0.181, Rweak 0.011, Alpha 0.039, Orientation as input
REM Formula found by SHELXT: C42 N2 O4
CELL 0.71073 12.0435 11.5154 28.6939 90 96.039 90
ZERR 8 0.0006 0.0006 0.0014 0 0.002 0
LATT 1
SYMM -X,0.5+Y,0.5-Z
SFAC C H B N O
UNIT 160 256 8 8 16

L.S. 5
PLAN  15
SIZE 0.204 0.309 0.312
TEMP -153.15
BOND $H
LIST 6
MORE -1
CONF
fmap 2
acta 52
OMIT -3 55
REM <olex2.extras>
REM <HklSrc "%./mo_DC350_0m.hkl">
REM </olex2.extras>

WGHT    0.057400    2.760500
FVAR       0.27730
PART 1
O17   5    0.535739    0.179920    0.344203    11.00000    0.02354    0.01708 =
         0.03406   -0.00536    0.01247   -0.00837
O18   5    0.497627    0.281512    0.408968    11.00000    0.02909    0.02055 =
         0.02501   -0.00273    0.00926   -0.01100
N7    4    0.851354    0.636107    0.315397    11.00000    0.02198    0.01411 =
         0.01753   -0.00282    0.00336   -0.00625
C1    1    0.782014    0.550663    0.329338    11.00000    0.01469    0.01204 =
         0.01744    0.00004   -0.00122   -0.00097
C2    1    0.735975    0.558317    0.372879    11.00000    0.01508    0.01532 =
         0.01792   -0.00219   -0.00059   -0.00001
C3    1    0.667048    0.470041    0.385489    11.00000    0.01697    0.01693 =
         0.01598   -0.00042    0.00121    0.00109
AFIX  43
H3    2    0.638616    0.474993    0.415078    11.00000   -1.20000
AFIX   0
C4    1    0.636828    0.373681    0.357027    11.00000    0.01449    0.01292 =
         0.02061    0.00134    0.00073    0.00064
C5    1    0.680449    0.369878    0.314325    11.00000    0.01985    0.01275 =
         0.02325   -0.00499    0.00090   -0.00351
AFIX  43
H5    2    0.660621    0.306947    0.293706    11.00000   -1.20000
AFIX   0
C6    1    0.751835    0.454307    0.300565    11.00000    0.02198    0.01710 =
         0.01683   -0.00341    0.00383   -0.00434
AFIX  43
H6    2    0.781009    0.447173    0.271200    11.00000   -1.20000
AFIX   0
C8    1    0.898751    0.627896    0.270463    11.00000    0.02187    0.01608 =
         0.01574   -0.00019    0.00281   -0.00608
AFIX  13
H8    2    0.842150    0.588057    0.247944    11.00000   -1.20000
AFIX   0
C9    1    0.919627    0.747241    0.250184    11.00000    0.03451    0.02129 =
         0.02523    0.00525    0.00297   -0.00781
AFIX 137
H9A   2    0.852676    0.795336    0.250834    11.00000   -1.50000
H9B   2    0.937075    0.738775    0.217759    11.00000   -1.50000
H9C   2    0.982556    0.784377    0.268913    11.00000   -1.50000
AFIX   0
C10   1    1.004290    0.553730    0.274278    11.00000    0.02776    0.02196 =
         0.03038   -0.00262    0.00665   -0.00280
AFIX 137
H10A  2    1.062898    0.591979    0.295098    11.00000   -1.50000
H10B  2    1.029551    0.544221    0.243133    11.00000   -1.50000
H10C  2    0.988212    0.477350    0.287053    11.00000   -1.50000
AFIX   0
PART 0
C11   1    0.905291    0.719492    0.348686    11.00000    0.02682    0.02168 =
         0.02580   -0.00831    0.00412   -0.01154
AFIX  23
H11A  2    0.877911    0.798378    0.339891    11.00000   -1.20000
H11B  2    0.986766    0.718094    0.346488    11.00000   -1.20000
AFIX   0
PART 1
C12   1    0.884500    0.696003    0.398358    11.00000    0.03245    0.03199 =
         0.02788   -0.00978    0.00349   -0.01343
AFIX  23
H12A  2    0.905226    0.765677    0.417540    11.00000   -1.20000
H12B  2    0.933150    0.631332    0.410726    11.00000   -1.20000
AFIX   0
PART 0
C13   1    0.762844    0.664750    0.403470    11.00000    0.02530    0.02187 =
         0.02236   -0.00844    0.00568   -0.00854
PART 1
C14   1    0.749084    0.645499    0.454369    11.00000    0.05358    0.04665 =
         0.02986   -0.01548    0.01273   -0.02457
AFIX 137
H14A  2    0.670829    0.627414    0.457764    11.00000   -1.50000
H14B  2    0.771020    0.715932    0.472180    11.00000   -1.50000
H14C  2    0.796433    0.580603    0.466339    11.00000   -1.50000
AFIX   0
C15   1    0.685642    0.765869    0.384773    11.00000    0.03769    0.02285 =
         0.05589   -0.01243    0.00542   -0.00039
AFIX 137
H15A  2    0.691643    0.776890    0.351265    11.00000   -1.50000
H15B  2    0.708277    0.837320    0.401741    11.00000   -1.50000
H15C  2    0.608201    0.747322    0.389494    11.00000   -1.50000
AFIX   0
C19   1    0.439881    0.122030    0.361064    11.00000    0.01733    0.01614 =
         0.03219    0.00125    0.00700   -0.00439
C20   1    0.454758   -0.007536    0.356551    11.00000    0.02919    0.01788 =
         0.06920   -0.00465    0.01578   -0.00578
AFIX 137
H20A  2    0.448871   -0.028804    0.323312    11.00000   -1.50000
H20B  2    0.396657   -0.047867    0.371772    11.00000   -1.50000
H20C  2    0.528403   -0.030029    0.371639    11.00000   -1.50000
AFIX   0
C21   1    0.337812    0.161876    0.329894    11.00000    0.02881    0.02918 =
         0.03637    0.00450   -0.00307   -0.01177
AFIX 137
H21A  2    0.329275    0.246079    0.332957    11.00000   -1.50000
H21B  2    0.271421    0.122790    0.339312    11.00000   -1.50000
H21C  2    0.346643    0.142561    0.297226    11.00000   -1.50000
AFIX   0
C22   1    0.443420    0.168654    0.412059    11.00000    0.02587    0.02201 =
         0.02662    0.00289    0.00482   -0.01065
C23   1    0.329830    0.186781    0.429083    11.00000    0.03875    0.04329 =
         0.04373   -0.01161    0.02294   -0.01788
AFIX 137
H23A  2    0.339226    0.216263    0.461295    11.00000   -1.50000
H23B  2    0.289544    0.112740    0.428206    11.00000   -1.50000
H23C  2    0.287228    0.243066    0.408762    11.00000   -1.50000
AFIX   0
C24   1    0.517112    0.097007    0.446991    11.00000    0.04809    0.05250 =
         0.04813    0.02950   -0.01379   -0.02401
AFIX 137
H24A  2    0.589930    0.085271    0.435357    11.00000   -1.50000
H24B  2    0.481898    0.021516    0.451146    11.00000   -1.50000
H24C  2    0.527275    0.137793    0.477114    11.00000   -1.50000
AFIX   0
B16   3    0.556600    0.277967    0.370932    11.00000    0.01471    0.01365 =
         0.02220    0.00182   -0.00114    0.00122

PART 0
O41   5    0.005514    0.993708    0.430270    11.00000    0.02379    0.01553 =
         0.02104    0.00030    0.00541    0.00446
O42   5    0.035578    1.092397    0.363601    11.00000    0.02031    0.01561 =
         0.02309    0.00155    0.00608    0.00633
N31   4    0.319468    0.612173    0.331574    11.00000    0.02366    0.01593 =
         0.01996    0.00230    0.00460    0.00736
C25   1    0.262925    0.706410    0.346898    11.00000    0.01288    0.01286 =
         0.01846   -0.00003    0.00014   -0.00014
C26   1    0.233616    0.712127    0.393689    11.00000    0.01535    0.01302 =
         0.01838    0.00059   -0.00126   -0.00074
C27   1    0.172272    0.806044    0.406862    11.00000    0.01757    0.01590 =
         0.01556   -0.00128    0.00125   -0.00159
AFIX  43
H27   2    0.153581    0.808888    0.438192    11.00000   -1.20000
AFIX   0
C28   1    0.136162    0.897220    0.376575    11.00000    0.01334    0.01130 =
         0.01909   -0.00076    0.00004   -0.00120
C29   1    0.166804    0.889998    0.331260    11.00000    0.01446    0.01231 =
         0.02016    0.00333   -0.00056    0.00041
AFIX  43
H29   2    0.144183    0.950014    0.309599    11.00000   -1.20000
AFIX   0
C30   1    0.228713    0.799034    0.316678    11.00000    0.01918    0.01515 =
         0.01586    0.00137    0.00268    0.00031
AFIX  43
H30   2    0.248822    0.798700    0.285540    11.00000   -1.20000
AFIX   0
C32   1    0.353698    0.607682    0.283910    11.00000    0.02445    0.01860 =
         0.02018   -0.00122    0.00230    0.00688
AFIX  13
H32   2    0.296315    0.651041    0.262988    11.00000   -1.20000
AFIX   0
C33   1    0.465034    0.668330    0.281187    11.00000    0.02721    0.03291 =
         0.02647    0.00043    0.00657    0.00336
AFIX 137
H33A  2    0.460816    0.747883    0.293005    11.00000   -1.50000
H33B  2    0.482028    0.670249    0.248537    11.00000   -1.50000
H33C  2    0.523989    0.625930    0.300265    11.00000   -1.50000
AFIX   0
C34   1    0.355998    0.483734    0.265575    11.00000    0.04408    0.02548 =
         0.03599   -0.00897    0.00550    0.00695
AFIX 137
H34A  2    0.417333    0.441072    0.283045    11.00000   -1.50000
H34B  2    0.367129    0.484945    0.232234    11.00000   -1.50000
H34C  2    0.285011    0.445398    0.269642    11.00000   -1.50000
AFIX   0
C35   1    0.373346    0.528071    0.364500    11.00000    0.03672    0.02400 =
         0.03231    0.00914    0.01031    0.01786
AFIX  23
H35A  2    0.449638    0.512445    0.356163    11.00000   -1.20000
H35B  2    0.331065    0.454245    0.361555    11.00000   -1.20000
AFIX   0
C36   1    0.380531    0.568556    0.414488    11.00000    0.02781    0.02940 =
         0.02831    0.01084   -0.00104    0.01165
AFIX  23
H36A  2    0.436984    0.631085    0.419315    11.00000   -1.20000
H36B  2    0.405425    0.503286    0.435494    11.00000   -1.20000
AFIX   0
C37   1    0.268507    0.613767    0.427446    11.00000    0.02715    0.01628 =
         0.01783    0.00246    0.00039    0.00482
C38   1    0.180325    0.516916    0.422033    11.00000    0.03702    0.01903 =
         0.03817    0.00884    0.00526    0.00098
AFIX 137
H38A  2    0.111377    0.544302    0.433736    11.00000   -1.50000
H38B  2    0.208241    0.448705    0.440039    11.00000   -1.50000
H38C  2    0.165118    0.495973    0.388873    11.00000   -1.50000
AFIX   0
C39   1    0.283266    0.653641    0.478552    11.00000    0.05796    0.02839 =
         0.02160    0.00343   -0.00409    0.01224
AFIX 137
H39A  2    0.333899    0.720454    0.481728    11.00000   -1.50000
H39B  2    0.314767    0.590067    0.498454    11.00000   -1.50000
H39C  2    0.210591    0.675960    0.488230    11.00000   -1.50000
AFIX   0
C43   1   -0.050762    1.105516    0.433105    11.00000    0.01970    0.01528 =
         0.02365   -0.00320    0.00384    0.00218
C44   1   -0.161521    1.085255    0.452455    11.00000    0.02669    0.02570 =
         0.03568   -0.00471    0.01274    0.00041
AFIX 137
H44A  2   -0.203434    1.025084    0.433952    11.00000   -1.50000
H44B  2   -0.204675    1.157559    0.450743    11.00000   -1.50000
H44C  2   -0.148060    1.060023    0.485180    11.00000   -1.50000
AFIX   0
C45   1    0.024040    1.180920    0.466766    11.00000    0.02857    0.02656 =
         0.02657   -0.00790    0.00047    0.00261
AFIX 137
H45A  2    0.037762    1.141571    0.497109    11.00000   -1.50000
H45B  2   -0.012698    1.255582    0.470934    11.00000   -1.50000
H45C  2    0.095233    1.194170    0.453935    11.00000   -1.50000
AFIX   0
C46   1   -0.060287    1.148440    0.381335    11.00000    0.01887    0.01548 =
         0.02371   -0.00237    0.00399    0.00541
C47   1   -0.163089    1.102494    0.351826    11.00000    0.02378    0.02817 =
         0.02994   -0.00501   -0.00403    0.01025
AFIX 137
H47A  2   -0.230029    1.139223    0.361852    11.00000   -1.50000
H47B  2   -0.167810    1.018187    0.355842    11.00000   -1.50000
H47C  2   -0.157727    1.120440    0.318752    11.00000   -1.50000
AFIX   0
C48   1   -0.050202    1.278731    0.375807    11.00000    0.03118    0.01702 =
         0.03614    0.00212    0.00741    0.00710
AFIX 137
H48A  2    0.022121    1.304759    0.391087    11.00000   -1.50000
H48B  2   -0.110390    1.317308    0.390345    11.00000   -1.50000
H48C  2   -0.055815    1.298409    0.342414    11.00000   -1.50000
AFIX   0
B40   3    0.059801    0.995629    0.390655    11.00000    0.01402    0.01348 =
         0.01858   -0.00164   -0.00026   -0.00163
HKLF 4

REM  mo_dc350_0m_a.res in P2(1)/c
REM R1 =  0.0600 for    6489 Fo > 4sig(Fo)  and  0.0919 for all    9094 data
REM    449 parameters refined using      0 restraints

END

WGHT      0.0574      2.7605

REM Highest difference peak  0.514,  deepest hole -0.258,  1-sigma level  0.052
Q1    1   0.8136  0.7600  0.3838  11.00000  0.05    0.51
Q2    1   0.8659  0.6011  0.4440  11.00000  0.05    0.46
Q3    1   0.6710  0.6945  0.4328  11.00000  0.05    0.44
Q4    1   0.0951  0.9433  0.3827  11.00000  0.05    0.37
Q5    1   0.7633  0.6045  0.3903  11.00000  0.05    0.32
Q6    1   0.2572  0.6738  0.4134  11.00000  0.05    0.31
Q7    1  -0.0587  1.1361  0.4088  11.00000  0.05    0.30
Q8    1   0.6088  0.3237  0.3653  11.00000  0.05    0.29
Q9    1   0.2970  0.6641  0.3403  11.00000  0.05    0.28
Q10   1   0.2664  0.7170  0.3730  11.00000  0.05    0.28
Q11   1   0.7570  0.5585  0.3509  11.00000  0.05    0.28
Q12   1   0.2254  0.7358  0.3280  11.00000  0.05    0.28
Q13   1   0.2205  0.5758  0.4236  11.00000  0.05    0.28
Q14   1   0.3413  0.6044  0.3082  11.00000  0.05    0.27
Q15   1  -0.0171  1.1431  0.4493  11.00000  0.05    0.27
;
_shelx_res_checksum               58259
_shelx_hkl_file
;
   2   0   0   19.80    1.10
   2   0   0   21.30    1.00
   2   0   0   20.20    1.30
   2   0   0   21.00    1.40
  -2   0   0   20.90    1.10
  -2   0   0   21.20    1.30
  -3   0   0  115.09    5.00
  -3   0   0  124.09    5.20
   3   0   0  127.09    5.20
   3   0   0  124.29    5.00
   3   0   0  131.29    4.80
   3   0   0  120.69    5.10
   4   0   0  442.86   15.80
   4   0   0  432.06   16.10
   4   0   0  421.86   15.80
   4   0   0  435.56   16.30
  -4   0   0  424.56   16.30
  -4   0   0  413.86   16.10
   4   0   0  425.66   16.20
  -5   0   0   89.19    4.50
   5   0   0   91.99    3.80
   5   0   0   89.29    4.10
   5   0   0   87.99    3.70
   5   0   0   89.39    4.30
   5   0   0   92.89    4.50
  -5   0   0   89.59    4.20
   6   0   0  430.56   16.80
   6   0   0  440.56   17.10
   6   0   0  430.26   16.30
  -6   0   0  426.66   16.90
   6   0   0  460.45   16.40
  -6   0   0  446.06   17.30
   7   0   0   13.10    1.50
   7   0   0   12.80    2.00
  -7   0   0    8.80    1.80
  -7   0   0   13.80    2.00
   7   0   0   15.20    1.40
   7   0   0   15.60    2.10
   7   0   0    8.20    1.80
   8   0   0    9.40    2.10
  -8   0   0    9.20    1.90
   8   0   0    9.60    1.20
   8   0   0   12.80    1.50
  -8   0   0    6.10    1.60
   8   0   0   10.20    2.70
   8   0   0   10.00    2.20
   9   0   0   27.10    2.10
   9   0   0   29.30    3.50
   9   0   0   30.60    3.10
  -9   0   0   27.90    3.60
  -9   0   0   32.40    3.10
   9   0   0   25.10    2.40
  10   0   0  383.06   15.10
  10   0   0  394.46   15.00
 -10   0   0  415.96   16.10
 -10   0   0  396.06   16.80
  10   0   0  369.56   16.40
 -11   0   0   11.80    3.40
 -11   0   0    9.70    2.90
  11   0   0   15.70    3.50
  11   0   0   11.80    2.00
  11   0   0   11.60    2.00
 -12   0   0   45.80    4.80
  12   0   0   30.80    3.30
  12   0   0   35.00    5.00
 -12   0   0   28.90    4.20
  13   0   0   23.50    3.20
  13   0   0   24.00    5.00
 -13   0   0   25.20    4.40
 -14   0   0   24.20    5.00
  14   0   0   17.80    5.20
  14   0   0   17.00    3.20
  15   0   0    3.00    5.70
 -15   0   0    5.50    5.50
  16   0   0   -7.90    6.60
 -16   0   0    0.60    6.80
  17   0   0    9.90    7.90
  -1  -1   0  354.56   13.20
   1  -1   0  332.57   13.20
  -1  -1   0  353.96   13.30
   1  -1   0  354.56   13.20
   1  -1   0  377.06   13.30
   1   1   0  358.26   13.20
   1   1   0  361.96   13.40
   1   1   0  347.77   13.10
  -1   1   0  376.06   13.20
  -1   1   0  367.36   13.30
  -2  -1   0  121.69    4.70
   2  -1   0  109.69    4.50
   2  -1   0  104.19    4.40
   2  -1   0  113.09    4.70
   2  -1   0  111.89    4.70
  -2  -1   0  127.09    4.60
   2   1   0  126.19    4.60
   2   1   0  126.59    4.80
   2   1   0  125.79    4.40
  -2   1   0  102.79    4.40
   2   1   0  122.49    4.70
  -2   1   0  109.69    4.50
  -2   1   0  112.29    4.70
  -3  -1   0  171.48    6.50
  -3  -1   0  168.78    7.00
   3  -1   0  178.78    6.70
   3  -1   0  184.98    7.00
   3  -1   0  176.38    6.70
   3  -1   0  179.08    7.10
  -3  -1   0  171.38    6.90
  -3   1   0  189.18    6.80
   3   1   0  170.48    6.90
  -3   1   0  173.78    6.70
   3   1   0  174.38    6.50
  -3   1   0  180.48    7.00
   3   1   0  169.68    7.00
   3   1   0  172.28    7.00
  -4  -1   0  477.65   17.50
   4  -1   0  479.25   18.10
  -4  -1   0  463.55   18.00
   4  -1   0  482.85   17.70
  -4  -1   0  476.85   17.90
   4  -1   0  463.55   17.60
   4  -1   0  492.55   18.10
  -4  -1   0  480.85   18.10
   4   1   0  469.85   17.90
   4   1   0  473.35   18.00
  -4   1   0  479.25   18.10
  -4   1   0  456.35   17.70
   4   1   0  489.85   18.10
   4   1   0  483.75   17.50
   5  -1   0   28.60    2.50
  -5  -1   0   26.80    2.20
   5  -1   0   31.10    2.50
  -5  -1   0   27.70    2.50
   5  -1   0   31.20    1.80
   5  -1   0   25.10    1.90
   5  -1   0   30.10    2.50
  -5   1   0   29.60    2.60
   5   1   0   30.70    2.20
   5   1   0   29.80    1.60
  -5   1   0   24.40    1.90
   5   1   0   29.90    2.20
   5   1   0   28.30    2.50
  -6  -1   0    9.30    1.80
   6  -1   0    9.40    1.90
   6  -1   0   11.30    1.40
   6  -1   0    7.80    1.60
   6  -1   0   12.00    1.60
   6  -1   0   14.60    2.30
  -6  -1   0   12.50    2.10
  -6   1   0   13.90    2.10
   6   1   0   13.00    1.90
   6   1   0   13.80    2.10
   6   1   0   12.50    2.10
   6   1   0   12.10    1.20
  -6   1   0   10.20    1.50
   7  -1   0  117.19    5.10
  -7  -1   0  106.69    5.50
  -7  -1   0  102.69    5.70
   7  -1   0  111.79    5.80
   7  -1   0  115.39    6.00
   7  -1   0  121.69    4.90
   7  -1   0  110.99    5.70
   7  -1   0  110.09    4.80
   7   1   0  112.59    6.20
  -7   1   0  112.29    5.80
   7   1   0  113.39    4.70
   7   1   0  120.89    5.60
   7   1   0  109.69    4.60
  -7   1   0  111.09    5.20
   7   1   0  115.69    5.50
  -8  -1   0   17.00    2.50
   8  -1   0   13.60    1.70
   8  -1   0   14.40    2.10
   8  -1   0   14.10    3.20
   8  -1   0   14.00    2.50
  -8  -1   0   13.40    2.20
   8   1   0   20.80    2.80
  -8   1   0   11.20    2.30
   8   1   0   17.70    2.50
   8   1   0   13.50    1.60
   8   1   0   14.90    1.50
   9  -1   0   64.19    3.80
   9  -1   0   68.79    4.70
   9  -1   0   64.99    3.60
  -9  -1   0   76.49    4.60
   9  -1   0   65.59    4.10
   9   1   0   68.19    3.40
   9   1   0   71.59    4.60
  -9   1   0   60.19    4.90
   9   1   0   65.49    3.20
   9   1   0   64.99    4.60
  -9   1   0   70.39    4.30
  10  -1   0  146.19    7.50
  10  -1   0  123.49    6.20
  10  -1   0  125.79    6.60
 -10  -1   0  147.09    7.20
  10   1   0  139.19    5.70
  10   1   0  131.19    5.80
  10   1   0  134.39    7.30
 -10   1   0  121.49    7.50
 -10   1   0  145.89    6.90
  11  -1   0   14.90    2.40
 -11  -1   0   20.60    3.30
  11  -1   0   16.00    3.70
  11  -1   0   17.00    2.30
  11   1   0   14.30    1.80
 -11   1   0   19.50    3.10
 -11   1   0   19.40    3.60
  11   1   0   15.10    1.80
  11   1   0   18.20    3.60
  12  -1   0   31.10    3.20
  12  -1   0   38.00    3.50
 -12  -1   0   37.00    5.00
  12  -1   0   36.10    4.90
 -12   1   0   40.00    4.60
  12   1   0   30.20    3.00
  12   1   0   32.60    3.10
  12   1   0   40.00    5.20
 -12   1   0   32.70    4.50
  13  -1   0   12.00    2.70
 -13  -1   0   13.60    3.90
  13  -1   0   14.00    4.20
 -13   1   0   10.60    3.80
  13   1   0   10.00    2.60
  13   1   0   14.60    4.20
 -13   1   0   11.30    4.20
  14  -1   0   -3.20    4.50
 -14  -1   0    4.90    4.40
  14  -1   0    0.70    2.90
 -14   1   0   -1.50    4.10
  14   1   0   -2.10    4.40
 -14   1   0    7.20    5.20
 -15  -1   0   18.00    5.80
  15  -1   0    2.60    5.50
 -15   1   0    2.80    5.20
  15   1   0   -5.90    5.20
  16  -1   0   -7.70    6.30
  16   1   0    0.20    5.90
 -16   1   0   -4.50    6.20
   0  -2   0   98.79    3.90
   0  -2   0   95.19    3.80
   0  -2   0   96.59    3.90
   0  -2   0   98.99    4.00
   0   2   0   95.09    3.80
   0   2   0   97.49    3.90
   0   2   0  100.09    4.00
   0   2   0  100.59    3.90
  -1  -2   0    7.30    0.90
   1  -2   0    8.10    0.90
   1  -2   0    5.30    0.50
  -1  -2   0    8.40    0.90
  -1  -2   0    7.50    0.70
  -1  -2   0    5.20    0.70
   1  -2   0    7.40    0.90
   1  -2   0    6.40    0.80
   1   2   0    5.20    0.70
  -1   2   0    6.50    0.90
  -1   2   0    9.30    1.00
  -1   2   0    5.40    0.50
  -1   2   0    6.70    0.80
   1   2   0    7.70    0.70
   1   2   0    6.90    0.80
   1   2   0    8.20    0.90
  -2  -2   0    5.60    1.00
   2  -2   0    4.50    0.70
   2  -2   0    4.80    1.20
  -2  -2   0    8.50    0.70
  -2  -2   0    7.60    0.90
  -2  -2   0    6.70    1.00
   2   2   0    4.50    0.80
  -2   2   0    5.80    1.00
   2   2   0    6.30    0.70
   2   2   0    6.50    1.00
   3  -2   0  268.77   10.10
  -3  -2   0  258.47    9.90
  -3  -2   0  256.37    9.60
   3  -2   0  262.07   10.20
  -3  -2   0  252.17   10.10
   3  -2   0  258.57    9.80
   3  -2   0  242.48    9.50
  -3   2   0  264.97   10.10
   3   2   0  261.77   10.10
   3   2   0  259.47    9.60
  -3   2   0  270.97    9.90
   3   2   0  256.37    9.80
   3   2   0  250.67   10.10
  -3   2   0  256.37   10.20
  -3   2   0  255.17    9.50
  -4  -2   0   83.99    4.30
  -4  -2   0   85.89    4.00
   4  -2   0   99.59    4.50
   4  -2   0   94.79    4.00
   4  -2   0   95.59    3.70
   4  -2   0   93.99    4.30
  -4  -2   0   88.79    3.60
  -4   2   0   93.09    3.70
   4   2   0   89.59    3.60
  -4   2   0  101.49    4.00
   4   2   0   86.69    4.00
   4   2   0   90.49    4.40
  -4   2   0   99.89    4.40
   4   2   0   88.89    4.30
   5  -2   0  932.91   35.30
   5  -2   0  972.90   35.90
   5  -2   0  997.30   35.80
   5  -2   0  938.41   35.10
  -5  -2   0  945.61   35.00
  -5  -2   0  922.11   35.70
  -5  -2   0  988.40   35.50
  -5   2   0  944.31   35.20
   5   2   0  944.41   34.90
  -5   2   0  997.40   35.30
  -5   2   0  935.71   35.70
   5   2   0  937.11   35.50
   5   2   0  982.80   35.70
   5   2   0  981.80   35.80
  -6  -2   0  172.88    6.70
  -6  -2   0  171.58    7.60
  -6  -2   0  175.88    7.50
   6  -2   0  167.88    7.60
   6  -2   0  173.78    6.90
   6  -2   0  162.38    7.00
   6  -2   0  182.08    7.90
  -6   2   0  170.58    7.70
   6   2   0  174.38    6.60
  -6   2   0  169.58    7.00
   6   2   0  165.78    7.40
   6   2   0  177.78    7.60
   6   2   0  177.28    7.70
   7  -2   0   23.90    2.10
   7  -2   0   23.50    2.80
   7  -2   0   24.90    2.00
  -7  -2   0   26.20    2.80
   7  -2   0   20.30    2.90
   7  -2   0   22.40    3.30
   7   2   0   24.30    2.50
  -7   2   0   23.50    2.90
  -7   2   0   25.30    2.20
   7   2   0   23.30    3.10
   7   2   0   26.00    2.10
   7   2   0   28.80    2.90
  -8  -2   0   27.90    3.10
   8  -2   0   26.80    3.10
   8  -2   0   34.40    2.60
  -8   2   0   30.00    3.30
   8   2   0   28.50    1.90
   8   2   0   38.10    3.40
  -8   2   0   28.90    2.70
   8   2   0   28.20    2.90
   9  -2   0    9.30    1.90
   9  -2   0    3.90    2.30
   9  -2   0    8.70    1.70
   9  -2   0   11.10    2.00
  -9  -2   0    8.40    2.40
   9   2   0    9.00    1.10
   9   2   0   11.30    1.30
  -9   2   0    3.90    2.10
   9   2   0   10.80    2.50
  10  -2   0    1.90    2.00
 -10  -2   0    0.00    2.30
  10  -2   0    4.20    2.30
  10  -2   0   -0.30    1.50
  10  -2   0    5.20    2.60
 -10   2   0   -2.20    2.20
  10   2   0    2.50    1.10
 -10   2   0    4.30    2.20
  10   2   0    3.00    1.20
  10   2   0    7.40    2.70
  11  -2   0   31.10    3.30
  11  -2   0   31.80    3.90
 -11  -2   0   32.50    4.50
  11  -2   0   31.10    4.20
  11  -2   0   28.60    3.70
 -11   2   0   22.10    3.60
  11   2   0   26.70    2.40
  11   2   0   20.90    2.20
  11   2   0   28.00    3.90
 -11   2   0   31.50    4.00
  12  -2   0    4.20    2.70
  12  -2   0    4.80    3.50
 -12  -2   0    9.30    3.50
  12  -2   0    4.80    2.30
  12   2   0    2.70    1.50
  12   2   0    1.80    1.60
 -12   2   0    0.60    3.00
 -12   2   0    2.10    3.30
  12   2   0    1.10    3.20
 -13  -2   0    1.00    3.70
  13  -2   0   -1.60    4.00
  13  -2   0   -0.10    2.70
 -13   2   0   -2.50    3.40
  13   2   0    1.90    3.60
 -13   2   0   -1.90    3.30
  13   2   0    2.70    1.70
 -14  -2   0   11.40    4.80
  14  -2   0   10.50    3.60
 -14   2   0   10.00    4.70
  14   2   0   -0.20    4.50
 -14   2   0   17.60    6.60
 -15  -2   0   14.70    6.30
  15  -2   0   24.60    6.80
 -15   2   0   17.20    5.70
 -15   2   0   13.30    5.40
  15   2   0   10.00    7.20
  16  -2   0    1.40    6.30
 -16  -2   0    6.70    6.50
  16   2   0    4.70    5.90
   0  -3   0   -0.10    0.50
   0  -3   0    0.70    0.50
   0  -3   0   -0.40    0.50
   0  -3   0   -0.80    0.50
   0   3   0    0.30    0.50
   0   3   0   -0.70    0.50
   0   3   0    1.50    0.60
   0   3   0   -0.60    0.60
  -1  -3   0  869.31   33.10
   1  -3   0  917.11   33.30
  -1  -3   0  880.21   33.20
   1  -3   0  894.01   32.90
  -1  -3   0  907.61   33.10
   1  -3   0  906.01   33.20
  -1  -3   0  939.81   33.30
   1   3   0  909.61   33.10
  -1   3   0  916.21   32.90
  -1   3   0  935.41   33.20
  -1   3   0  906.71   33.30
   1   3   0  852.91   33.40
   1   3   0  907.31   33.30
  -1   3   0  913.81   33.30
   2  -3   0   15.00    1.50
   2  -3   0   18.80    1.40
   2  -3   0   14.20    0.70
  -2  -3   0   13.70    1.60
  -2  -3   0   15.10    1.20
   2  -3   0   15.20    1.60
  -2  -3   0   12.50    1.40
  -2  -3   0   16.20    1.10
  -2   3   0   14.60    0.70
  -2   3   0   17.10    1.50
   2   3   0   16.30    1.10
  -2   3   0   14.40    1.50
   2   3   0   11.30    1.50
   2   3   0   13.00    1.20
  -2   3   0   14.80    1.40
   2   3   0   14.00    1.50
  -3  -3   0  331.07   12.10
   3  -3   0  328.37   12.60
   3  -3   0  332.57   12.70
   3  -3   0  306.07   12.30
  -3  -3   0  325.27   12.70
  -3   3   0  312.87   12.50
   3   3   0  322.17   12.30
   3   3   0  324.77   12.60
  -3   3   0  315.77   12.70
   3   3   0  327.57   12.60
   3   3   0  333.57   12.10
  -3   3   0  332.87   12.40
   4  -3   0  293.47   11.70
   4  -3   0  291.27   11.50
  -4  -3   0  279.67   11.60
   4  -3   0  273.67   10.60
   4  -3   0  284.77   11.20
  -4  -3   0  296.17   11.20
  -4  -3   0  298.97   10.90
   4   3   0  290.17   11.20
  -4   3   0  292.97   11.50
  -4   3   0  281.87   11.60
   4   3   0  282.97   11.50
  -4   3   0  294.27   11.20
   4   3   0  292.67   11.50
   4   3   0  301.27   10.80
   5  -3   0  957.70   35.40
  -5  -3   0  947.61   35.40
  -5  -3   0  928.21   36.40
   5  -3   0  945.51   35.80
   5  -3   0  988.70   36.40
   5  -3   0  993.20   36.20
  -5  -3   0  979.20   35.90
   5   3   0  992.10   36.30
  -5   3   0 1011.70   35.90
   5   3   0  970.50   36.30
   5   3   0  962.60   35.90
   5   3   0  945.91   36.30
   5   3   0  983.40   35.40
   6  -3   0   14.40    2.10
   6  -3   0   17.80    2.10
   6  -3   0   15.80    1.50
  -6  -3   0   16.30    1.30
   6  -3   0   15.60    2.50
  -6  -3   0   14.00    2.20
  -6  -3   0   18.10    2.10
  -6   3   0   18.80    2.30
   6   3   0   13.00    1.30
   6   3   0   15.50    2.10
   6   3   0   14.70    2.20
   6   3   0   15.20    2.20
  -6   3   0   18.30    2.10
   6   3   0   15.50    2.20
  -6   3   0   14.70    1.50
  -7  -3   0   21.80    2.80
  -7  -3   0   23.90    1.70
   7  -3   0   28.00    2.00
   7  -3   0   30.10    2.40
   7  -3   0   24.60    3.40
   7  -3   0   25.00    3.50
  -7  -3   0   27.10    3.00
  -7   3   0   25.90    2.90
  -7   3   0   25.70    2.10
   7   3   0   28.40    2.60
   7   3   0   30.80    3.20
   7   3   0   26.50    3.30
  -8  -3   0   -1.20    1.60
   8  -3   0    2.10    1.30
   8  -3   0    1.10    2.00
   8  -3   0    2.00    1.40
  -8   3   0    4.30    1.80
  -8   3   0    1.50    1.30
   8   3   0    1.30    1.40
   8   3   0    1.60    1.70
  -9  -3   0   11.30    2.70
   9  -3   0   13.20    2.80
   9  -3   0   11.60    1.90
   9  -3   0   13.30    1.90
   9   3   0    9.80    1.40
   9   3   0   11.90    2.40
  -9   3   0   12.90    2.10
  -9   3   0    6.80    2.30
  10  -3   0   31.40    3.20
  10  -3   0   39.70    4.40
  10  -3   0   39.30    4.00
 -10  -3   0   32.60    4.30
  10  -3   0   36.90    3.30
  10   3   0   38.20    2.20
  10   3   0   34.00    3.90
  10   3   0   28.90    2.30
 -10   3   0   33.90    4.40
  11  -3   0    5.90    2.60
  11  -3   0    3.90    2.90
 -11  -3   0   -1.30    2.80
  11  -3   0    2.00    1.90
  11   3   0    1.60    1.20
 -11   3   0   -2.80    2.70
 -11   3   0    1.70    2.70
  11   3   0    5.60    2.80
 -12  -3   0   13.40    3.80
  12  -3   0   15.00    3.80
  12  -3   0   18.80    2.90
  12  -3   0   25.60    4.80
 -12   3   0   20.40    3.80
 -12   3   0   18.30    4.10
  12   3   0   15.40    1.80
  12   3   0   17.90    3.90
 -13  -3   0   30.10    5.10
  13  -3   0   20.00    3.80
  13  -3   0   14.70    4.70
 -13   3   0   22.00    4.90
  13   3   0   16.70    4.40
 -13   3   0   27.40    4.30
  14  -3   0   -5.10    4.90
  14  -3   0   -1.30    3.40
 -14  -3   0    0.50    5.00
  14   3   0    4.20    4.40
  14   3   0   -1.00    4.10
 -14   3   0    5.50    4.40
 -15  -3   0   -2.70    5.70
  15  -3   0   -2.60    4.70
  15  -3   0    1.60    5.70
  15   3   0   -2.10    4.40
 -15   3   0    5.00    5.10
 -16  -3   0   15.30    7.40
  16  -3   0   -2.90    7.00
 -16   3   0    4.50    6.80
  16   3   0    2.60    5.50
  16   3   0   -4.80    5.80
   0  -4   0  221.78    8.70
   0  -4   0  222.18    8.90
   0  -4   0  231.28    8.80
   0  -4   0  217.48    8.60
   0   4   0  223.18    8.70
   0   4   0  220.28    8.90
   0   4   0  225.28    8.80
   1  -4   0    8.90    1.30
  -1  -4   0    5.90    1.10
   1  -4   0    6.80    1.10
   1  -4   0    6.00    0.80
   1  -4   0    6.90    1.00
  -1  -4   0    6.00    0.90
  -1  -4   0    5.50    1.10
  -1   4   0    8.30    1.10
   1   4   0    7.50    0.90
  -1   4   0    8.20    1.20
  -1   4   0    7.70    1.30
   1   4   0    6.20    1.10
   1   4   0    5.70    1.10
  -1   4   0    7.30    0.80
   1   4   0    5.90    1.00
   2  -4   0  223.38    9.30
   2  -4   0  231.28    8.90
  -2  -4   0  236.88    9.40
   2  -4   0  232.88    9.50
   2  -4   0  235.28    9.60
  -2  -4   0  245.58    9.20
  -2  -4   0  249.58    9.70
  -2  -4   0  236.68    9.50
  -2   4   0  239.68    9.70
  -2   4   0  243.08    9.40
   2   4   0  243.28    9.60
  -2   4   0  231.68    9.50
   2   4   0  246.18    9.20
   2   4   0  246.88    9.30
   2   4   0  250.07    9.60
  -2   4   0  236.78    8.90
  -3  -4   0   32.80    2.00
   3  -4   0   31.70    2.40
   3  -4   0   33.20    2.60
  -3  -4   0   28.80    2.40
  -3  -4   0   31.40    2.60
   3  -4   0   30.60    2.20
  -3  -4   0   33.10    1.90
   3   4   0   30.60    2.50
  -3   4   0   32.40    2.50
  -3   4   0   31.90    2.50
  -3   4   0   31.00    2.20
   3   4   0   32.40    2.50
   3   4   0   34.80    1.90
   3   4   0   28.00    2.00
  -4  -4   0  162.88    6.50
   4  -4   0  162.58    7.00
   4  -4   0  168.58    7.30
   4  -4   0  163.58    7.40
  -4  -4   0  167.58    6.80
  -4   4   0  169.78    7.00
   4   4   0  165.48    7.20
   4   4   0  167.18    6.50
   4   4   0  161.88    6.80
  -4   4   0  165.98    7.30
  -5  -4   0   67.79    3.50
   5  -4   0   69.79    4.10
  -5  -4   0   67.49    3.10
   5  -4   0   66.49    3.70
   5  -4   0   69.59    4.30
  -5  -4   0   66.89    4.00
   5   4   0   68.39    3.00
   5   4   0   67.59    4.10
   5   4   0   67.69    3.50
  -5   4   0   68.89    4.10
   5   4   0   64.99    4.00
  -5   4   0   72.49    3.80
   6  -4   0   19.10    2.20
  -6  -4   0   15.70    2.20
   6  -4   0   16.90    1.20
   6  -4   0   14.20    2.40
   6  -4   0   16.50    1.20
   6  -4   0   13.70    2.70
  -6  -4   0   16.80    2.40
  -6  -4   0   18.90    1.50
   6   4   0   17.50    2.60
  -6   4   0   17.30    2.00
   6   4   0   18.60    1.40
   6   4   0   16.60    2.20
  -6   4   0   18.10    2.60
   6   4   0   23.30    3.00
   6   4   0   18.40    2.20
   7  -4   0   76.99    4.00
   7  -4   0   67.39    3.10
   7  -4   0   55.99    4.60
  -7  -4   0   70.19    4.10
  -7  -4   0   71.79    4.60
  -7  -4   0   78.59    3.30
   7   4   0   73.09    4.10
  -7   4   0   63.49    4.10
   7   4   0   68.39    4.60
   7   4   0   73.19    3.20
  -7   4   0   67.09    4.50
  -8  -4   0   11.90    1.30
   8  -4   0   12.10    1.90
   8  -4   0   14.20    1.90
  -8  -4   0   12.70    2.40
  -8  -4   0   12.20    2.70
   8   4   0   10.70    2.40
   8   4   0   10.60    2.30
  -8   4   0   10.70    2.30
   8   4   0   12.00    1.30
   9  -4   0   35.00    4.30
   9  -4   0   38.70    3.20
   9  -4   0   35.20    2.70
  -9  -4   0   41.90    4.20
   9   4   0   35.40    4.00
   9   4   0   30.80    2.20
   9   4   0   32.70    3.60
  -9   4   0   30.40    4.20
  10  -4   0  110.09    5.70
  10  -4   0  107.99    6.90
  10  -4   0  104.49    5.00
 -10  -4   0   95.29    6.30
  10   4   0  102.79    6.70
 -10   4   0   91.29    6.70
  10   4   0   98.99    6.10
  11  -4   0   15.30    2.70
  11  -4   0   15.50    2.60
 -11  -4   0   12.80    3.70
  11  -4   0   14.10    3.80
 -11   4   0   13.70    3.70
  11   4   0   14.60    3.30
  11   4   0    8.40    3.20
  11   4   0   13.80    1.70
  12  -4   0    1.30    3.60
 -12  -4   0    8.10    3.80
  12  -4   0    0.60    2.50
  12   4   0   12.10    3.80
  12   4   0   11.20    3.70
 -12   4   0    6.20    3.50
  13  -4   0    0.70    3.10
 -13  -4   0   13.40    4.60
  13  -4   0    3.10    4.40
  13   4   0   19.10    4.60
 -13   4   0    0.40    3.80
  13   4   0    8.70    4.20
  14  -4   0    8.10    4.90
  14  -4   0   11.10    5.70
  14   4   0    0.70    4.20
 -14   4   0   -2.20    4.50
  14   4   0   -5.30    4.40
  15  -4   0    7.00    4.50
  15  -4   0    4.30    6.50
 -15  -4   0    5.90    6.00
 -15   4   0   -3.50    5.10
  15   4   0   12.00    5.50
 -16  -4   0   11.00    7.70
  16  -4   0   12.10    8.30
  16   4   0   15.10    6.60
  16   4   0    2.20    5.90
 -16   4   0    6.40    6.90
   0  -5   0    1.00    1.00
   0  -5   0   -1.10    1.10
   0  -5   0    0.50    1.00
   0   5   0   -0.20    1.00
   0   5   0   -0.60    0.90
   0   5   0    1.90    1.00
   0   5   0    0.20    0.90
  -1  -5   0    2.50    1.00
   1  -5   0    1.20    1.10
  -1  -5   0    1.30    1.10
  -1  -5   0    4.90    1.40
   1  -5   0    2.30    0.80
   1  -5   0    2.70    1.10
   1  -5   0    1.90    1.20
  -1  -5   0    1.70    1.10
   1   5   0    3.40    1.20
  -1   5   0    1.20    0.90
  -1   5   0    3.30    1.30
   1   5   0    1.40    1.20
  -1   5   0    2.30    1.00
   1   5   0    2.10    1.10
   1   5   0    2.50    1.00
  -1   5   0    1.10    1.20
  -2  -5   0   -0.40    1.20
   2  -5   0    0.20    0.60
  -2  -5   0   -1.40    1.00
   2  -5   0   -0.10    1.10
   2  -5   0    0.80    1.30
  -2  -5   0    2.10    0.90
  -2  -5   0    0.80    1.10
  -2   5   0    1.80    1.30
   2   5   0   -0.20    1.10
  -2   5   0    0.00    0.60
   2   5   0   -0.30    1.30
   2   5   0    1.90    0.90
  -2   5   0    1.40    1.20
   2   5   0    1.80    1.00
  -2   5   0    0.10    1.20
   3  -5   0   25.60    2.80
   3  -5   0   27.60    2.50
  -3  -5   0   24.20    2.80
   3  -5   0   30.80    2.30
  -3  -5   0   25.30    1.90
  -3  -5   0   24.00    2.00
   3   5   0   23.80    2.90
  -3   5   0   27.50    2.40
  -3   5   0   28.90    3.10
   3   5   0   23.00    2.00
   3   5   0   21.10    2.50
   3   5   0   22.40    1.80
   4  -5   0  156.38    7.00
   4  -5   0  158.18    7.30
  -4  -5   0  166.78    6.80
  -4  -5   0  169.68    6.60
   4  -5   0  166.98    7.60
  -4  -5   0  167.58    7.50
  -4  -5   0  161.38    7.30
   4   5   0  170.78    6.60
   4   5   0  162.68    7.40
  -4   5   0  160.78    7.50
  -4   5   0  162.28    7.40
  -4   5   0  159.38    7.10
   4   5   0  166.88    7.30
   4   5   0  161.78    6.80
   5  -5   0    3.10    1.80
  -5  -5   0    3.90    1.90
   5  -5   0    6.10    1.50
   5  -5   0    6.00    2.40
  -5  -5   0    6.00    1.50
  -5  -5   0    7.00    1.10
   5   5   0    3.80    2.10
  -5   5   0    6.00    1.70
   5   5   0    8.70    1.60
  -5   5   0    4.70    1.70
   5   5   0    6.30    1.80
   5   5   0    6.00    1.10
  -5   5   0    5.00    1.80
  -6  -5   0   10.20    2.40
   6  -5   0   13.40    1.90
  -6  -5   0   15.60    2.00
   6  -5   0   10.00    2.30
  -6  -5   0   13.70    1.60
   6   5   0   15.10    2.00
   6   5   0    9.40    1.80
  -6   5   0   13.10    2.10
  -6   5   0   10.20    2.00
   6   5   0   11.10    1.30
  -7  -5   0   17.90    2.70
   7  -5   0   23.20    2.60
  -7  -5   0   22.10    1.90
  -7  -5   0   16.30    2.70
  -7   5   0   13.50    2.30
   7   5   0   23.80    2.70
   7   5   0   20.80    2.80
  -7   5   0   20.40    2.90
   7   5   0   18.10    1.80
  -8  -5   0   -0.10    2.10
  -8  -5   0    2.70    1.20
   8  -5   0    0.20    1.60
  -8  -5   0    2.80    2.10
   8   5   0    2.60    1.10
   8   5   0    2.30    2.10
  -8   5   0   -1.20    1.90
   8   5   0    5.10    2.10
   9  -5   0   44.10    2.50
   9  -5   0   44.50    2.50
  -9  -5   0   49.99    2.80
   9  -5   0   62.29    3.90
  -9  -5   0   54.39    4.90
   9   5   0   45.30    2.70
   9   5   0   45.00    4.10
  -9   5   0   49.00    4.80
   9   5   0   50.79    4.70
  10  -5   0   34.80    3.50
 -10  -5   0   32.60    4.30
  10  -5   0   31.60    4.50
  10  -5   0   27.20    2.30
  10   5   0   40.30    4.30
 -10   5   0   25.20    3.80
  10   5   0   31.80    4.20
  10   5   0   24.90    2.30
  11  -5   0   21.30    3.40
  11  -5   0   19.50    2.80
 -11  -5   0   29.00    4.20
  11  -5   0   22.60    2.70
  11  -5   0   25.80    4.40
  11   5   0   17.40    3.60
  11   5   0   23.00    3.90
 -11   5   0   19.00    3.70
  12  -5   0    5.60    2.20
  12  -5   0    4.50    3.90
 -12  -5   0    6.10    4.10
  12  -5   0    3.80    2.90
 -12   5   0    7.60    3.90
  12   5   0    2.90    3.20
  12   5   0    5.20    3.50
  13  -5   0    9.20    5.30
 -13  -5   0    8.70    4.80
  13  -5   0    9.80    3.60
  13   5   0    8.40    4.60
  13   5   0    3.60    4.30
 -13   5   0    5.70    4.30
  14  -5   0   11.20    6.00
  14  -5   0   14.90    4.80
 -14  -5   0   12.90    5.60
 -14   5   0    6.90    5.10
  14   5   0   10.10    4.50
  14   5   0   11.30    5.10
 -15  -5   0   14.30    7.10
  15  -5   0   11.40    6.60
  15  -5   0   15.80    5.70
  15   5   0   12.00    5.90
 -15   5   0    7.80    6.30
 -16  -5   0   -3.80    7.70
  16  -5   0   -8.70    7.80
  16   5   0    1.70    6.00
  16   5   0   -8.10    6.40
 -16   5   0    2.70    6.90
   0  -6   0   93.09    4.50
   0  -6   0   87.79    4.40
   0  -6   0   87.49    4.20
   0  -6   0   92.29    4.60
   0   6   0   92.79    4.40
   0   6   0   89.89    4.50
   0   6   0   90.89    4.20
  -1  -6   0  130.79    6.00
   1  -6   0  126.89    5.30
  -1  -6   0  119.09    5.60
   1  -6   0  124.39    5.60
   1  -6   0  131.19    5.80
  -1  -6   0  122.69    5.50
   1  -6   0  128.19    5.80
   1   6   0  128.49    5.60
   1   6   0  123.29    5.50
   1   6   0  126.49    5.60
  -1   6   0  125.89    5.70
  -1   6   0  125.59    5.30
   1   6   0  118.89    6.00
  -1   6   0  121.19    5.80
  -2  -6   0   18.50    2.30
   2  -6   0   13.30    1.90
   2  -6   0   12.00    2.00
   2  -6   0   13.70    1.80
  -2  -6   0   12.90    1.60
   2  -6   0   11.00    1.30
  -2  -6   0   15.00    1.90
   2   6   0   11.40    1.80
   2   6   0   16.80    2.20
   2   6   0   15.60    1.80
  -2   6   0   13.60    1.30
  -2   6   0   13.40    1.80
  -2   6   0   16.10    2.20
   2   6   0   13.30    1.80
  -3  -6   0    6.90    1.90
  -3  -6   0    5.40    1.80
   3  -6   0    9.90    2.20
  -3  -6   0    8.20    1.40
   3  -6   0    6.50    0.80
   3  -6   0    5.80    1.40
   3  -6   0    5.60    1.60
  -3  -6   0    8.10    1.50
  -3   6   0    7.80    1.70
   3   6   0    6.00    1.80
  -3   6   0    6.10    1.70
   3   6   0    5.90    1.30
  -3   6   0    2.90    1.80
  -3   6   0    7.40    0.90
   3   6   0    5.80    2.10
   3   6   0    6.80    1.50
  -4  -6   0   41.50    3.40
  -4  -6   0   44.50    2.70
   4  -6   0   46.50    4.00
  -4  -6   0   44.10    2.90
   4  -6   0   43.40    3.60
  -4  -6   0   47.90    3.90
   4  -6   0   46.50    3.10
  -4   6   0   41.90    3.50
  -4   6   0   46.30    3.60
  -4   6   0   43.20    3.30
   4   6   0   42.60    3.40
   4   6   0   40.60    2.70
   4   6   0   48.20    3.70
   4   6   0   43.50    2.60
  -5  -6   0   14.00    1.80
  -5  -6   0   16.50    2.60
   5  -6   0   11.40    2.20
   5  -6   0   19.00    3.30
   5  -6   0   14.00    2.00
  -5  -6   0   17.70    2.10
   5   6   0   14.70    1.90
   5   6   0   18.20    2.20
  -5   6   0   21.20    2.80
   5   6   0   15.50    2.30
  -5   6   0   20.50    2.90
  -5   6   0   16.20    2.40
  -6  -6   0    3.30    2.00
  -6  -6   0    4.70    1.20
   6  -6   0    3.50    1.60
  -6  -6   0    2.90    1.70
  -6   6   0   -0.30    1.70
   6   6   0    2.30    1.20
   6   6   0    3.50    1.90
  -7  -6   0   -1.20    1.10
   7  -6   0   -0.70    1.60
  -7  -6   0    1.80    1.80
  -7  -6   0   -0.80    2.20
   7   6   0   -0.10    1.30
   7   6   0    0.50    1.80
   7   6   0    1.60    2.00
  -7   6   0   -1.20    1.90
  -8  -6   0    0.70    1.20
   8  -6   0    6.00    2.20
  -8  -6   0    3.40    2.20
  -8  -6   0    1.40    2.50
  -8   6   0   -1.40    2.20
   8   6   0    1.60    1.30
   8   6   0   -2.00    2.10
   8   6   0   -0.70    1.90
   9  -6   0   94.69    5.40
  -9  -6   0   89.39    6.50
  -9  -6   0   97.19    4.50
   9   6   0   98.09    6.60
  -9   6   0   84.39    6.30
   9   6   0  101.19    5.70
   9   6   0   92.39    4.40
  10  -6   0   17.10    3.00
 -10  -6   0   12.40    3.70
 -10  -6   0   16.10    1.80
  10  -6   0   12.40    3.90
  10   6   0   13.10    1.80
  10   6   0   17.40    3.20
 -10   6   0    9.80    3.30
  10   6   0   13.90    3.60
  11  -6   0   35.70    4.40
  11  -6   0   44.00    5.90
 -11  -6   0   28.30    5.10
  11   6   0   24.40    3.90
  11   6   0   32.50    4.60
 -11   6   0   32.30    4.60
  12  -6   0    5.00    3.40
 -12  -6   0    0.60    4.40
  12  -6   0    3.20    4.50
  12   6   0   -1.00    3.40
  12   6   0   -2.80    3.30
 -12   6   0   -2.00    3.80
 -13  -6   0   -2.70    5.00
  13  -6   0    2.90    3.70
  13  -6   0    5.00    4.80
  13   6   0    2.40    4.10
  13   6   0    3.20    4.10
  14  -6   0    2.30    4.40
 -14  -6   0    9.00    6.10
  14  -6   0    9.40    6.60
 -14   6   0   12.10    5.90
  14   6   0   -0.70    4.50
  14   6   0   -6.60    4.70
  15  -6   0    8.70    6.60
  15  -6   0   26.70    9.20
 -15  -6   0   20.80    7.40
  15   6   0    8.10    6.90
 -15   6   0   18.70    7.20
  15   6   0    5.60    6.50
   0  -7   0   -0.50    1.50
   0  -7   0   -0.10    1.20
   0  -7   0    0.10    1.20
   0  -7   0   -2.00    1.40
   0   7   0    1.00    1.30
   0   7   0    1.40    1.30
   0   7   0    1.10    1.30
   0   7   0   -0.30    1.40
   1  -7   0   42.00    3.20
   1  -7   0   46.30    3.50
   1  -7   0   43.10    3.00
   1  -7   0   42.20    2.60
  -1  -7   0   41.30    2.90
  -1  -7   0   34.40    3.40
  -1  -7   0   43.30    3.00
   1   7   0   40.60    3.00
   1   7   0   41.40    3.10
  -1   7   0   48.10    3.20
  -1   7   0   49.60    2.70
  -1   7   0   47.10    3.50
   1   7   0   45.60    3.50
   1   7   0   44.70    3.10
   2  -7   0   10.50    1.80
  -2  -7   0    7.10    1.80
  -2  -7   0    7.50    1.90
  -2  -7   0    8.60    1.70
  -2  -7   0    9.80    1.60
   2  -7   0   13.40    2.20
   2  -7   0   10.10    1.30
   2  -7   0    8.90    1.70
   2   7   0    7.90    1.90
  -2   7   0   11.10    1.50
   2   7   0    9.10    1.80
  -2   7   0    7.90    1.90
  -2   7   0    9.90    2.10
  -2   7   0   13.90    2.20
   2   7   0    9.00    1.80
   2   7   0    9.40    1.70
  -3  -7   0   26.10    3.30
   3  -7   0   17.70    2.30
   3  -7   0   24.30    3.00
  -3  -7   0   23.40    2.30
  -3  -7   0   23.60    2.40
   3  -7   0   20.60    1.40
   3  -7   0   23.00    2.60
  -3  -7   0   21.70    2.70
  -3   7   0   22.90    3.00
   3   7   0   18.60    2.30
   3   7   0   19.80    2.90
   3   7   0   21.20    2.70
  -3   7   0   23.00    1.50
  -3   7   0   21.60    2.90
   3   7   0   20.50    2.30
  -4  -7   0   21.40    2.70
   4  -7   0   23.00    2.70
   4  -7   0   22.70    3.20
   4  -7   0   17.70    2.90
  -4  -7   0   22.10    2.20
  -4  -7   0   19.10    2.40
   4   7   0   19.20    2.60
   4   7   0   18.30    2.30
   4   7   0   19.90    2.40
  -4   7   0   15.30    2.40
  -4   7   0   21.20    3.10
  -5  -7   0  105.39    5.10
  -5  -7   0  102.39    5.80
   5  -7   0  109.79    5.50
  -5  -7   0  100.39    5.50
   5   7   0  108.49    4.90
  -5   7   0  106.89    6.00
   5   7   0  101.89    5.90
   5   7   0  101.19    5.20
  -5   7   0  100.99    6.10
  -6  -7   0    3.20    1.90
   6  -7   0    4.10    2.00
   6   7   0    0.60    1.30
   6   7   0    1.90    2.10
  -6   7   0    4.10    2.60
  -6   7   0    0.70    1.90
   6   7   0    0.50    1.80
   7  -7   0    4.00    2.10
  -7  -7   0    2.30    2.10
  -7  -7   0    4.00    2.70
  -7  -7   0    4.40    1.70
   7   7   0    3.40    2.40
   7   7   0    4.40    2.10
   7   7   0    5.20    1.50
  -7   7   0    2.80    2.20
   8  -7   0   14.40    2.70
  -8  -7   0    8.20    1.80
  -8  -7   0   11.60    3.20
  -8  -7   0   10.60    2.50
   8   7   0   14.40    3.20
   8   7   0   14.00    2.60
  -8   7   0    3.70    2.60
   8   7   0    8.30    1.80
  -9  -7   0    5.70    3.10
   9  -7   0    8.30    2.70
  -9  -7   0    5.90    1.80
   9   7   0   13.70    2.90
   9   7   0   11.50    3.20
  -9   7   0    6.80    2.80
   9   7   0    7.50    1.80
 -10  -7   0   17.70    4.30
  10  -7   0   19.60    3.60
 -10  -7   0   16.30    2.10
  10   7   0   19.80    4.20
 -10   7   0   16.60    3.80
  10   7   0   17.60    3.50
  10   7   0   15.70    2.20
  11  -7   0   17.50    5.00
  11  -7   0   22.30    4.10
 -11  -7   0   26.70    5.20
  11   7   0   21.60    4.50
 -11   7   0   15.80    4.00
  11   7   0   24.20    4.00
  12  -7   0    0.40    4.50
 -12  -7   0   -3.10    4.70
  12  -7   0   -4.40    3.70
  12   7   0    0.00    4.00
  12   7   0   -2.40    3.50
 -12   7   0    1.20    3.80
  13  -7   0    5.80    4.10
 -13  -7   0    6.70    5.70
  13  -7   0    9.20    6.10
  13   7   0   -0.60    4.10
 -13   7   0   -8.60    4.70
  13   7   0    4.30    4.50
 -14  -7   0   15.40    7.30
  14  -7   0    9.20    6.10
  14  -7   0   26.30    7.90
  14   7   0    6.60    5.30
  14   7   0    6.10    4.90
 -14   7   0    3.20    5.70
  15  -7   0    4.70    8.10
 -15  -7   0    7.90    8.10
  15  -7   0   13.00    6.30
 -15   7   0    4.10    7.40
  15   7   0    9.50    6.70
   0  -8   0   88.89    4.60
   0  -8   0   93.49    5.50
   0  -8   0   90.79    4.80
   0  -8   0   78.39    5.80
   0   8   0   92.49    5.30
   0   8   0   86.69    4.90
   0   8   0   88.29    4.60
   1  -8   0    9.10    2.00
  -1  -8   0    9.40    2.00
   1  -8   0    9.30    2.00
  -1  -8   0   13.70    2.20
  -1  -8   0   12.60    1.90
   1  -8   0    6.60    2.10
   1  -8   0   11.20    1.60
   1   8   0   13.10    2.10
  -1   8   0    9.90    2.10
  -1   8   0   11.80    1.70
  -1   8   0    7.60    2.10
   1   8   0   12.90    2.20
   1   8   0   12.10    2.20
   2  -8   0   26.20    3.30
  -2  -8   0   26.70    2.90
   2  -8   0   32.40    2.90
  -2  -8   0   25.80    2.80
  -2  -8   0   27.60    2.60
   2  -8   0   31.50    2.20
   2   8   0   26.70    3.40
  -2   8   0   25.20    3.30
  -2   8   0   29.50    2.10
   2   8   0   29.30    2.90
   2   8   0   32.10    3.20
  -2   8   0   30.50    3.30
  -3  -8   0   56.09    3.40
   3  -8   0   54.39    3.70
  -3  -8   0   51.09    4.00
   3  -8   0   50.19    2.60
   3  -8   0   47.90    4.20
  -3  -8   0   55.99    3.50
   3   8   0   49.99    3.50
  -3   8   0   49.60    2.80
  -3   8   0   51.59    4.20
  -3   8   0   50.99    4.20
   3   8   0   48.30    5.00
   3   8   0   56.19    4.30
   4  -8   0  143.09    6.90
  -4  -8   0  148.09    6.50
  -4  -8   0  140.19    7.20
  -4  -8   0  145.39    6.60
  -4   8   0  148.19    7.50
  -4   8   0  146.99    7.50
   4   8   0  139.49    6.50
   4   8   0  134.89    7.50
  -5  -8   0   45.30    3.50
  -5  -8   0   53.19    4.40
   5  -8   0   52.69    4.00
  -5  -8   0   45.90    3.20
  -5   8   0   36.70    4.30
   5   8   0   49.90    3.80
   5   8   0   40.10    3.40
  -5   8   0   38.20    4.30
   5   8   0   42.60    4.40
   6  -8   0   28.00    3.40
  -6  -8   0   22.70    3.30
  -6  -8   0   29.10    2.70
  -6  -8   0   30.00    4.10
  -6   8   0   30.60    4.10
   6   8   0   33.80    3.30
  -6   8   0   28.80    4.10
   6   8   0   28.60    3.60
   6   8   0   26.80    3.00
  -7  -8   0   -1.80    2.40
  -7  -8   0    1.80    2.30
  -7  -8   0    0.70    1.60
   7  -8   0    0.50    2.20
   7   8   0   -0.90    1.80
  -7   8   0    0.00    2.60
   7   8   0   -1.20    2.50
   7   8   0    1.10    2.10
  -8  -8   0   48.00    5.50
  -8  -8   0   55.69    3.60
  -8  -8   0   52.29    4.50
   8  -8   0   52.09    5.00
   8   8   0   61.39    4.50
   8   8   0   56.39    5.70
  -8   8   0   54.09    5.40
   8   8   0   49.10    3.80
   9  -8   0    5.80    2.90
  -9  -8   0    8.50    3.70
   9   8   0   10.50    2.90
   9   8   0    7.30    2.20
   9   8   0    2.50    3.30
  -9   8   0    8.00    3.50
  10  -8   0    3.90    3.20
 -10  -8   0    6.40    2.30
 -10  -8   0   13.10    4.50
  10   8   0    7.10    3.70
 -10   8   0    7.30    3.40
  10   8   0    6.60    3.00
  11  -8   0   -3.60    3.30
 -11  -8   0    7.40    7.90
  11   8   0    0.70    3.20
 -11   8   0    6.40    3.90
  12  -8   0   -1.20    3.70
 -12  -8   0    5.60    4.80
  12  -8   0    1.60    5.10
  12   8   0    5.40    3.60
  12   8   0   -1.30    4.70
 -12   8   0   -1.50    5.30
 -13  -8   0   -2.50    6.00
  13  -8   0    7.70    6.90
  13   8   0    1.80    4.20
  13   8   0   -8.10    4.80
 -13   8   0   -2.10    5.30
  14  -8   0   25.50    7.90
  14  -8   0   57.19   10.50
 -14  -8   0   35.50    8.80
 -14   8   0   26.40    6.80
  14   8   0   14.80    6.20
  14   8   0   31.40    5.80
   0  -9   0   -1.60    1.60
   0  -9   0    1.00    1.60
   0  -9   0    0.00    2.00
   0   9   0    2.00    1.80
   0   9   0    1.30    1.90
   0   9   0   -1.50    1.80
  -1  -9   0   24.00    2.90
   1  -9   0   27.00    2.70
   1  -9   0   30.20    3.50
   1  -9   0   31.50    3.10
  -1  -9   0   27.70    3.00
  -1  -9   0   29.70    3.20
   1   9   0   31.10    3.60
   1   9   0   26.70    3.20
   1   9   0   31.70    3.40
  -1   9   0   27.10    2.70
  -1   9   0   18.30    2.80
  -1   9   0   25.60    3.50
  -2  -9   0   44.30    3.40
   2  -9   0   46.60    3.70
  -2  -9   0   42.30    3.90
  -2  -9   0   45.10    3.60
   2  -9   0   48.40    2.90
   2   9   0   44.30    4.40
   2   9   0   45.00    3.70
  -2   9   0   38.50    4.20
  -2   9   0   47.30    4.40
  -2   9   0   50.89    2.90
  -3  -9   0   14.80    2.70
  -3  -9   0   11.40    2.00
  -3  -9   0    6.80    2.20
   3  -9   0    9.80    1.40
  -3   9   0   10.60    2.50
   3   9   0    8.90    2.50
   3   9   0    7.90    2.20
  -3   9   0   14.10    3.00
  -3   9   0   10.20    1.50
   4  -9   0  131.69    6.50
  -4  -9   0  120.49    5.90
  -4  -9   0  114.29    6.70
  -4  -9   0  120.09    6.00
   4   9   0  110.99    6.90
   4   9   0  116.89    6.20
  -4   9   0  119.09    7.00
  -4   9   0  117.19    7.10
   5  -9   0   -0.90    2.20
  -5  -9   0   -0.70    1.50
  -5  -9   0    0.10    2.20
  -5  -9   0    4.70    2.80
   5   9   0   -0.50    2.00
  -5   9   0   -1.90    2.50
   5   9   0    2.70    3.00
  -5   9   0    1.60    2.30
   5   9   0   -0.70    2.20
  -6  -9   0   22.30    3.90
  -6  -9   0   22.60    2.50
  -6  -9   0   16.30    3.00
   6  -9   0   13.40    3.00
  -6   9   0   16.80    3.10
   6   9   0   23.00    3.30
   6   9   0   23.30    3.80
  -6   9   0   19.80    3.90
   6   9   0   17.00    2.50
  -7  -9   0   15.60    3.90
  -7  -9   0    7.20    2.80
   7  -9   0   12.80    3.00
  -7  -9   0   11.20    2.10
  -7   9   0   14.10    3.60
   7   9   0   10.00    2.50
   7   9   0   16.30    3.00
   7   9   0   10.50    3.60
  -8  -9   0    0.80    3.30
  -8  -9   0    4.60    2.00
   8  -9   0   -2.50    2.70
   8   9   0    5.00    2.70
  -8   9   0   -0.50    3.10
   8   9   0   -0.90    3.00
   8   9   0    0.50    2.40
  -9  -9   0    0.60    2.10
   9  -9   0    3.80    3.50
  -9  -9   0    0.20    3.70
  -9   9   0   -1.70    3.30
   9   9   0    2.40    2.80
   9   9   0   -4.60    3.40
 -10  -9   0   12.20    2.40
  10  -9   0    6.10    3.60
  10   9   0   11.70    5.20
 -10   9   0    3.40    3.70
  10   9   0   15.30    3.60
  11  -9   0   19.70    4.10
  11  -9   0    5.90    5.80
 -11  -9   0   13.10    5.00
  11   9   0    5.70    4.90
 -11   9   0    9.60    5.80
  11   9   0   19.70    3.90
  12  -9   0   14.30    6.80
 -12  -9   0   12.60    6.30
  12  -9   0   12.50    5.10
 -12   9   0   13.20    5.30
  12   9   0   12.80    4.40
  12   9   0    7.40    5.30
  13  -9   0   14.90    7.90
 -13  -9   0   15.90    7.10
  13  -9   0   -7.60    6.60
 -13   9   0    3.90    6.20
  13   9   0    5.70    4.50
  13   9   0    2.50    5.70
  14  -9   0   21.40    6.60
 -14  -9   0   17.20    9.30
  14  -9   0   13.40    9.70
  14   9   0   19.10    6.60
 -14   9   0   18.80    8.00
   0 -10   0  157.28    7.30
   0 -10   0  150.08    7.00
   0 -10   0  131.79    7.30
   0  10   0  145.39    7.10
   0  10   0  147.59    8.00
   0  10   0  145.59    7.50
   1 -10   0   33.40    3.20
  -1 -10   0   35.00    3.60
   1 -10   0   34.80    3.60
  -1 -10   0   36.90    3.70
  -1 -10   0   29.70    3.60
   1  10   0   37.10    4.30
   1  10   0   38.20    4.50
  -1  10   0   30.00    4.10
  -1  10   0   32.90    3.20
   1  10   0   27.60    3.70
  -1  10   0   27.80    3.80
  -2 -10   0   33.10    3.50
   2 -10   0   42.70    3.90
   2 -10   0   34.40    2.90
  -2 -10   0   34.80    3.80
  -2 -10   0   35.40    3.80
   2  10   0   37.70    3.80
  -2  10   0   34.40    3.20
  -2  10   0   31.00    4.40
  -2  10   0   38.00    4.30
   2  10   0   33.90    4.60
  -3 -10   0   19.20    3.30
  -3 -10   0   23.20    2.70
   3 -10   0   28.80    3.70
  -3 -10   0   23.70    3.10
   3 -10   0   19.70    2.10
  -3  10   0   18.90    2.50
  -3  10   0   18.30    3.20
   3  10   0   26.10    3.30
  -3  10   0   22.70    3.70
   3  10   0   23.80    3.50
  -4 -10   0   -0.40    1.70
   4 -10   0    3.40    2.40
  -4 -10   0    1.60    2.40
  -4 -10   0   -1.10    2.50
  -4  10   0   -0.60    2.40
   4  10   0   -4.90    2.40
  -4  10   0    1.50    2.90
   4  10   0    1.50    2.20
  -5 -10   0    4.90    1.90
   5 -10   0    5.70    2.60
  -5 -10   0    1.40    2.90
  -5 -10   0    0.10    2.60
   5  10   0    3.70    2.80
   5  10   0    5.60    2.40
  -5  10   0    1.20    2.70
  -5  10   0    2.60    3.20
   6 -10   0   70.39    5.40
  -6 -10   0   65.89    4.40
  -6 -10   0   62.19    4.90
  -6 -10   0   69.19    6.10
   6  10   0   72.59    5.00
  -6  10   0   73.39    6.20
   6  10   0   64.09    6.40
  -6  10   0   58.39    6.20
  -7 -10   0    4.00    3.30
   7 -10   0    4.30    3.00
  -7 -10   0    2.20    1.90
   7  10   0    3.10    2.60
  -7  10   0    0.00    3.00
   7  10   0    3.40    3.20
   8 -10   0   -0.40    3.40
  -8 -10   0    2.40    2.10
  -8 -10   0   -1.50    3.60
  -8  10   0    1.10    3.40
   8  10   0    8.40    2.90
   8  10   0   -0.30    3.50
  -9 -10   0    7.80    2.50
   9 -10   0    6.80    3.70
  -9  10   0   10.70    4.30
   9  10   0    9.80    3.50
   9  10   0   20.80    5.60
 -10 -10   0   17.60    3.10
 -10 -10   0   21.70    5.60
  10  10   0   17.90    4.80
 -10  10   0   13.10    5.10
  10  10   0   21.70    4.10
  11 -10   0    5.00    6.20
  11 -10   0    7.40    4.80
 -11 -10   0    9.00    5.90
 -11  10   0   -6.00    4.30
  11  10   0    7.90    3.90
  11  10   0    4.00    5.10
 -12 -10   0   12.10    7.00
  12 -10   0   -0.90    6.30
  12 -10   0   -0.40    5.20
  12  10   0   -4.20    5.70
  12  10   0    7.20    4.50
 -12  10   0   -4.90    5.20
  13 -10   0   -5.30    8.20
 -13 -10   0   12.50    8.70
  13 -10   0    2.70    7.60
  13  10   0   -1.10    6.20
 -13  10   0    2.70    5.80
   0 -11   0    7.70    2.30
   0  11   0    9.50    2.90
   0  11   0    7.70    2.80
   0  11   0    7.20    2.80
  -1 -11   0  300.57   12.40
   1 -11   0  258.77   12.40
   1 -11   0  280.57   11.80
  -1 -11   0  291.07   12.40
  -1  11   0  282.97   13.20
  -1  11   0  275.77   12.90
  -1  11   0  283.87   12.00
   1  11   0  294.47   13.30
   1  11   0  280.37   12.60
  -2 -11   0   -0.60    2.00
   2 -11   0    2.00    2.40
  -2 -11   0    0.50    2.30
   2  11   0    3.50    2.60
  -2  11   0    1.60    2.80
  -2  11   0    1.70    2.30
   2  11   0   -1.40    2.70
  -2  11   0    2.50    3.00
  -3 -11   0   57.39    5.00
   3 -11   0   54.69    3.30
   3 -11   0   50.59    5.00
  -3 -11   0   50.59    4.20
  -3 -11   0   53.29    4.60
  -3  11   0   53.49    5.80
   3  11   0   60.99    6.00
  -3  11   0   46.90    3.50
   3  11   0   54.59    4.80
  -3  11   0   54.39    5.50
  -4 -11   0   -1.00    2.70
  -4 -11   0    0.90    1.90
   4 -11   0    2.00    2.80
  -4 -11   0    2.80    3.00
  -4  11   0    6.60    3.10
   4  11   0   -0.20    2.50
   4  11   0   -2.80    2.90
  -4  11   0    0.40    3.20
  -5 -11   0    2.10    3.40
  -5 -11   0    2.00    2.10
   5 -11   0    1.20    2.90
   5  11   0   -0.90    2.80
   5  11   0    2.30    3.20
  -5  11   0    0.50    3.00
  -5  11   0   -0.80    3.50
  -6 -11   0   19.70    4.20
  -6 -11   0   16.20    2.80
   6 -11   0   12.00    3.60
   6  11   0   10.80    3.80
  -6  11   0   16.90    4.60
   6  11   0   18.60    3.50
  -6  11   0   11.70    3.60
  -7 -11   0    6.90    2.40
   7 -11   0    6.50    3.70
  -7 -11   0   11.40    4.40
   7  11   0    4.60    3.80
   7  11   0    7.20    3.10
  -7  11   0    1.00    3.50
  -8 -11   0   -3.00    2.30
  -8 -11   0    3.50    6.70
  -8  11   0   -2.30    3.80
   8  11   0    1.70    3.10
  -9 -11   0   30.60    6.20
  -9 -11   0   16.70    3.20
   9 -11   0   21.40    5.80
   9  11   0   27.90    4.40
   9  11   0   33.90    6.00
  10 -11   0    3.40    5.00
 -10 -11   0    7.80    5.90
 -10  11   0   -0.10    4.80
  10  11   0    2.10    4.60
  10  11   0    9.30    4.20
  11 -11   0   44.30    7.80
 -11 -11   0   82.59    9.80
  11 -11   0   65.39    9.60
 -11  11   0   43.80    7.40
  11  11   0   61.09    8.20
 -12 -11   0   -4.90    6.90
  12 -11   0   -1.70    6.60
  12 -11   0    9.80    8.80
 -12  11   0    1.10    5.80
  12  11   0   -9.10    6.10
   0 -12   0   43.60    4.80
   0 -12   0   50.39    4.60
   0  12   0   40.90    5.80
   0  12   0   53.49    5.60
   1 -12   0    4.20    2.80
  -1 -12   0    1.60    2.90
  -1 -12   0    2.70    2.60
   1 -12   0    2.20    2.30
   1  12   0    5.50    3.00
  -1  12   0    6.70    3.50
  -1  12   0   -1.20    3.20
   1  12   0    1.00    3.20
   2 -12   0   88.49    6.90
  -2 -12   0   93.89    6.30
  -2 -12   0  110.29    6.80
   2 -12   0  102.69    5.70
  -2  12   0   99.79    7.60
  -2  12   0   94.19    7.40
   2  12   0  113.79    7.00
   2  12   0  109.29    7.70
   3 -12   0   -2.20    2.90
  -3 -12   0   -0.10    2.40
   3 -12   0    2.30    1.70
  -3 -12   0    0.90    3.20
  -3  12   0    0.50    3.50
   3  12   0    3.60    2.90
   3  12   0    0.40    3.30
  -3  12   0    4.90    3.40
  -4 -12   0    1.70    3.40
   4 -12   0    0.30    3.00
  -4 -12   0   -3.70    2.30
   4  12   0    5.10    2.90
   4  12   0    4.10    3.70
  -4  12   0    0.10    3.50
  -4  12   0    8.10    4.40
   5 -12   0    7.00    3.60
  -5 -12   0    3.90    3.70
  -5 -12   0    4.10    2.60
  -5  12   0    5.60    3.70
   5  12   0    8.00    3.30
   5  12   0   10.20    4.10
  -5  12   0    2.60    4.10
  -6 -12   0    5.00    4.10
   6 -12   0    8.90    6.20
  -6 -12   0    8.20    2.80
  -6  12   0   10.80    4.10
   6  12   0   13.30    3.70
   6  12   0    9.30    4.40
   7 -12   0    6.80    4.30
  -7 -12   0    4.80    2.70
   7  12   0    7.90    4.40
  -7  12   0    4.70    4.20
   7  12   0    9.20    3.60
   8 -12   0   35.50    5.50
  -8 -12   0   51.09    7.10
  -8 -12   0   33.30    3.80
   8  12   0   22.90    5.90
   8  12   0   44.00    5.10
  -8  12   0   24.90    7.40
  -9 -12   0    1.70    5.70
  -9 -12   0    0.40    3.20
   9 -12   0    5.50    5.00
   9  12   0    5.50    5.70
  -9  12   0    4.60    5.30
 -10 -12   0   -3.20    6.60
  10 -12   0    7.80    5.70
  10  12   0   -2.30    6.10
 -10  12   0   -2.10    5.60
  11 -12   0   10.70    6.50
 -11 -12   0    6.30    8.10
  11 -12   0   29.70    9.70
  11  12   0  -12.70    6.90
 -11  12   0    9.40    6.50
   0 -13   0   -0.60    2.80
   0 -13   0    2.10    3.00
   0  13   0   -4.00    3.60
   0  13   0    2.50    3.60
   1 -13   0    3.10    2.80
   1 -13   0    4.10    3.30
  -1 -13   0   11.50    3.40
  -1 -13   0    0.80    2.70
  -1  13   0    1.80    3.90
  -1  13   0   -1.90    3.50
   1  13   0    8.80    3.90
   1  13   0    1.50    3.50
  -2 -13   0   39.00    4.40
  -2 -13   0   33.90    4.60
   2 -13   0   34.60    4.90
   2 -13   0   32.10    3.90
  -2  13   0   35.80    5.60
   2  13   0   33.00    5.30
  -2  13   0   22.20    4.80
   2  13   0   40.70    5.30
  -3 -13   0    5.30    2.90
  -3 -13   0    3.60    3.70
   3  13   0    3.60    3.40
   3  13   0    5.80    4.20
  -3  13   0    0.80    3.90
  -3  13   0   16.40    4.90
  -4 -13   0   53.39    6.10
  -4 -13   0   49.99    5.50
   4 -13   0   53.69    6.60
   4  13   0   48.30    5.60
  -4  13   0   58.99    7.40
   4  13   0   47.70    6.30
  -4  13   0   50.09    7.10
   5 -13   0   21.70    5.10
  -5 -13   0   28.50    5.30
  -5 -13   0   26.80    3.90
  -5  13   0   33.20    6.30
   5  13   0   37.90    6.20
   5  13   0   34.80    4.80
  -5  13   0   25.30    5.00
  -6 -13   0   43.20    5.20
   6 -13   0   43.50    6.70
   6  13   0   59.29    7.10
   6  13   0   61.19    6.10
  -7 -13   0    2.60    3.10
  -7 -13   0    2.10    5.40
   7 -13   0    3.60    5.00
   7  13   0    6.90    5.50
   7  13   0   14.30    5.00
  -7  13   0    3.30    5.10
   8 -13   0   -5.60    4.90
  -8 -13   0   -1.80    3.20
  -8 -13   0   10.60   10.00
  -8  13   0  -11.10    4.70
   8  13   0   -6.60    5.20
  -9 -13   0    1.20    6.70
   9 -13   0   -6.40    5.70
  -9  13   0    6.30    5.80
   9  13   0    0.80    6.00
  10 -13   0   15.50    7.60
 -10 -13   0   26.30    8.40
  10  13   0   18.30    7.50
 -10  13   0   15.30    6.80
   0 -14   0    1.90    3.60
   0 -14   0    1.30    3.40
   0  14   0   -0.10    4.50
  -1 -14   0    4.00    3.90
   1 -14   0   -2.20    3.70
   1 -14   0    3.50    3.30
  -1  14   0   -4.80    4.50
   1  14   0    6.50    5.90
   1  14   0    8.00    4.60
   2 -14   0    2.30    4.00
  -2 -14   0    5.30    4.10
  -2 -14   0    4.40    4.40
   2  14   0   -4.80    4.20
  -2  14   0    7.70    4.80
   2  14   0    4.90    4.40
  -3 -14   0   -2.20    3.10
  -3 -14   0    3.10    4.70
   3 -14   0    3.20    4.10
  -3  14   0   -0.30    4.90
  -3  14   0   -1.00    4.60
   3  14   0    1.70    4.40
   3  14   0    0.30    4.40
   4 -14   0    2.80    4.60
  -4 -14   0   12.40    5.70
  -4 -14   0   15.80    3.80
  -4  14   0   22.40    5.50
   4  14   0   10.50    4.90
   4  14   0   13.80    4.70
  -4  14   0   12.60    5.50
   5 -14   0    0.50    4.20
  -5 -14   0    0.10    5.60
  -5 -14   0   -1.70    3.20
   5  14   0    0.30    4.20
  -5  14   0   -1.90    4.70
   5  14   0    4.50    4.80
  -6 -14   0   18.30    4.00
  -6 -14   0   33.20    7.00
   6 -14   0   20.20    6.00
   6  14   0   32.10    6.30
  -6  14   0   22.00    5.70
  -7 -14   0    1.20    3.70
  -7 -14   0    8.70    6.30
   7 -14   0   -4.30    5.50
  -7  14   0    0.30    5.40
   7  14   0   -2.50    5.70
   8 -14   0    4.20    6.40
  -8 -14   0    5.70    7.10
   8  14   0    2.90    6.50
  -8  14   0    2.50    6.00
   0 -15   0   -3.20    3.80
   0 -15   0   -1.60    4.00
   0  15   0   -0.20    4.90
   0  15   0   -3.20    5.10
   1 -15   0   -4.20    4.40
  -1 -15   0    2.00    3.90
  -1 -15   0    0.50    4.30
  -1  15   0    0.50    5.20
  -1  15   0    0.40    5.60
   1  15   0   -0.10    5.00
   1  15   0   -0.30    5.20
  -2 -15   0    1.20    3.60
   2 -15   0    1.50    4.20
  -2 -15   0    2.20    4.80
  -2  15   0    3.90    5.60
   2  15   0    3.10    5.70
  -2  15   0   -4.00    4.90
   2  15   0   -6.70    4.70
  -3 -15   0    0.10    5.30
  -3 -15   0   -5.30    3.70
   3 -15   0   -5.40    5.20
   3  15   0    1.00    5.50
  -3  15   0   -6.70    5.10
  -3  15   0    2.80    5.70
  -4 -15   0   -3.40    5.50
  -4 -15   0   -6.00    3.80
   4 -15   0   -1.40    5.40
  -4  15   0   -0.10    6.60
  -4  15   0    0.30    5.30
   4  15   0   -2.60    5.10
  -5 -15   0   38.70    5.70
  -5 -15   0   50.49    7.90
   5 -15   0   40.90    7.30
   5  15   0   41.40    7.10
  -5  15   0   40.00    7.40
  -6 -15   0   -6.40    6.00
   6 -15   0    0.00    6.30
  -6 -15   0    1.60    4.10
   6  15   0   -0.90    6.20
  -6  15   0    2.10    6.10
   0 -16   0   -7.30    4.50
   0  16   0   -1.40    6.30
  -1 -16   0    1.30    4.80
   1 -16   0    2.90    4.70
   1  16   0  -11.00    5.70
  -1  16   0    7.60    7.00
  -2 -16   0   -9.10    4.30
   2 -16   0   -2.30    5.20
  -2 -16   0    5.60    5.90
  -2  16   0   -4.40    6.10
   2  16   0   -7.90    6.10
   3 -16   0    1.50    6.10
  -3 -16   0   -1.20    4.60
  -3 -16   0   -1.80    6.00
   3  16   0    3.50    6.40
  -3  16   0   -2.80    7.40
  -3  16   0  -15.70    5.90
  17   0  -1  -17.30    6.70
 -16   0   1   -4.70    6.00
  16   0  -1    0.10    6.70
 -15   0   1   -1.00    5.10
  15   0  -1    5.40    5.30
  14   0  -1    1.10    2.90
 -14   0   1   -0.60    4.10
  14   0  -1    0.10    4.40
  13   0  -1    2.80    3.80
  13   0  -1    0.00    2.30
 -13   0   1    1.70    3.50
  12   0  -1    5.00    3.40
 -12   0   1    0.30    2.90
  12   0  -1    1.70    2.00
  12   0  -1    1.30    2.10
  11   0  -1    2.50    2.70
 -11   0   1    0.80    2.40
  11   0  -1    2.20    1.80
 -11   0   1   -0.10    2.30
  10   0  -1    3.00    1.60
 -10   0   1    3.20    2.50
  10   0  -1    0.40    1.30
  10   0  -1    7.10    2.50
 -10   0   1    2.10    2.20
   9   0  -1    0.90    1.50
   9   0  -1    1.00    2.20
  -9   0   1    2.00    1.80
   9   0  -1    1.50    2.00
   9   0  -1    2.70    1.10
  -9   0   1    2.30    1.90
   8   0  -1    2.50    2.40
   8   0  -1    1.10    1.70
  -8   0   1   -1.50    1.40
   8   0  -1    1.30    1.60
  -8   0   1    0.90    1.50
   8   0  -1    0.40    2.30
   8   0  -1    0.90    1.20
   8   0  -1    1.10    1.00
  -7   0   1   -0.90    1.30
   7   0  -1   -0.10    1.70
   7   0  -1    0.20    1.50
   7   0  -1   -0.60    1.40
   7   0  -1   -0.90    1.40
   7   0  -1   -1.40    0.90
   7   0  -1    0.20    0.80
  -7   0   1    0.80    1.40
   6   0  -1    3.00    1.50
   6   0  -1   -1.30    1.20
   6   0  -1    0.20    0.90
   6   0  -1   -0.40    1.30
  -6   0   1   -0.50    1.20
   6   0  -1   -0.10    0.70
  -6   0   1   -0.60    1.10
   6   0  -1    1.20    1.40
   5   0  -1   -0.80    1.00
  -5   0   1   -0.60    1.00
   5   0  -1    2.00    1.20
   5   0  -1   -0.80    0.70
  -5   0   1   -0.40    0.90
   5   0  -1    0.60    1.10
   4   0  -1    0.30    0.90
   4   0  -1    0.30    0.90
   4   0  -1    0.80    0.80
  -4   0   1    0.10    0.90
  -4   0   1   -1.00    0.70
   4   0  -1   -0.20    0.50
   3   0  -1   -0.20    0.70
   3   0  -1   -0.20    0.40
  -3   0   1   -0.80    0.60
   3   0  -1    0.50    0.60
  -3   0   1   -0.60    0.60
   2   0  -1   -0.60    0.30
   2   0  -1   -0.10    0.40
  -2   0   1   -0.50    0.30
  -2   0   1   -0.60    0.40
   2   0  -1   -0.90    0.40
   2   0  -1   -0.60    0.50
  -2   0   1    0.00    0.40
   1   0   1    0.40    2.80
   2   0   1   -0.40    0.50
   2   0   1   -1.10    0.40
   2   0   1    0.20    0.50
  -2   0  -1   -0.50    0.50
  -2   0  -1   -0.20    0.50
  -2   0  -1   -0.60    0.60
   2   0   1    0.20    0.20
  -3   0  -1   -1.10    0.70
   3   0   1    0.10    0.30
  -3   0  -1   -0.70    0.60
   3   0   1   -0.30    0.70
   3   0   1    0.30    0.70
  -3   0  -1   -0.60    0.60
   3   0   1   -0.10    0.60
   4   0   1    0.20    0.80
  -4   0  -1   -0.50    0.70
   4   0   1   -0.10    0.40
   4   0   1    1.90    0.90
   5   0   1    0.10    1.10
   5   0   1   -1.30    1.10
   5   0   1   -0.60    1.00
  -5   0  -1   -0.10    0.90
  -5   0  -1    0.30    1.10
   5   0   1   -0.80    0.60
   5   0   1    0.70    0.60
  -6   0  -1   -1.00    1.10
   6   0   1    1.30    1.30
  -6   0  -1   -0.30    1.30
   6   0   1    0.90    1.20
   7   0   1    0.60    1.50
  -7   0  -1   -1.00    1.50
   7   0   1    0.80    1.80
   7   0   1    0.90    1.50
   7   0   1   -0.80    0.70
  -7   0  -1    0.80    1.40
   7   0   1    0.20    0.90
  -8   0  -1   -0.70    1.40
  -8   0  -1   -1.00    1.50
   8   0   1   -0.80    0.80
   8   0   1   -1.30    1.70
   8   0   1    0.40    1.80
   8   0   1    0.70    1.00
  -9   0  -1   -1.50    1.80
   9   0   1    4.10    2.00
   9   0   1   -0.70    1.90
   9   0   1   -0.50    1.30
   9   0   1    0.50    1.00
  -9   0  -1    2.30    1.70
 -10   0  -1    5.10    2.60
  10   0   1    4.90    1.50
  10   0   1    2.30    1.20
  10   0   1   10.60    2.70
  11   0   1    0.80    1.60
  11   0   1   -0.80    2.60
  11   0   1    0.90    1.60
 -11   0  -1   -1.50    2.70
 -11   0  -1    0.00    2.40
  12   0   1    4.10    2.00
  12   0   1   -1.10    1.90
 -12   0  -1   -1.20    2.90
  12   0   1   -3.80    3.20
 -12   0  -1    2.30    3.20
  13   0   1    2.70    3.70
 -13   0  -1    3.50    3.40
  14   0   1    1.40    4.50
 -14   0  -1    1.70    4.30
  15   0   1   -8.50    5.40
 -15   0  -1    0.20    5.10
 -16   0  -1   -2.60    7.10
  16   0   1    1.20    6.30
  17  -1  -1    6.50    7.90
  17   1  -1   -3.10    7.00
  16  -1  -1    8.10    6.50
  16   1  -1   -6.50    5.80
 -16   1   1   -2.50    6.20
  15  -1  -1   -1.20    5.30
 -15  -1   1    1.90    5.20
 -15   1   1    3.40    5.10
  15   1  -1   -0.80    7.00
  14  -1  -1   -2.10    4.40
  14  -1  -1   -0.50    3.50
 -14  -1   1    0.00    4.40
 -14   1   1    2.60    4.30
  14   1  -1  -10.00    4.10
 -13  -1   1   -1.80    3.50
  13  -1  -1    4.80    4.50
  13  -1  -1   -1.80    2.70
  13   1  -1    2.40    3.70
 -13   1   1    3.90    3.60
 -13   1   1    1.40    3.30
  12  -1  -1    3.80    2.60
  12  -1  -1    1.90    2.00
  12  -1  -1    3.30    3.50
 -12  -1   1    4.80    3.10
  12   1  -1    1.20    1.80
  12   1  -1    4.80    3.40
  12   1  -1    0.20    1.90
 -12   1   1    2.80    2.90
 -12   1   1    1.30    3.20
  11  -1  -1    4.70    1.90
  11  -1  -1    6.80    2.90
 -11  -1   1    6.30    2.70
  11  -1  -1    2.60    2.20
  11   1  -1    4.60    1.60
 -11   1   1    1.40    2.40
  11   1  -1    6.90    1.70
  11   1  -1    4.50    2.80
 -11   1   1    3.70    2.90
  10  -1  -1  145.89    7.00
 -10  -1   1  158.18    7.90
  10  -1  -1  169.78    8.20
  10  -1  -1  164.08    7.50
  10  -1  -1  162.08    6.90
  10   1  -1  150.38    6.50
  10   1  -1  150.88    6.60
  10   1  -1  155.58    8.00
 -10   1   1  163.78    7.70
 -10   1   1  137.99    8.20
   9  -1  -1   10.70    2.30
   9  -1  -1   10.80    2.40
   9  -1  -1   11.50    1.80
  -9  -1   1    9.60    2.30
   9   1  -1   10.70    1.60
   9   1  -1   16.70    2.70
   9   1  -1   10.00    1.30
   9   1  -1   17.20    2.80
  -9   1   1    9.00    2.20
  -9   1   1   12.00    2.30
   8  -1  -1   66.79    4.90
   8  -1  -1   70.39    4.50
   8  -1  -1   73.49    3.80
  -8  -1   1   74.09    4.40
   8  -1  -1   65.59    3.60
   8  -1  -1   72.49    4.10
   8  -1  -1   68.99    5.30
   8   1  -1   73.29    3.40
  -8   1   1   71.39    4.70
   8   1  -1   75.19    3.40
   8   1  -1   74.99    4.40
   8   1  -1   75.79    4.50
   7  -1  -1  132.69    5.30
   7  -1  -1  127.29    5.50
  -7  -1   1  121.19    5.90
  -7  -1   1  117.99    6.10
   7  -1  -1  121.99    6.20
   7  -1  -1  124.49    5.20
   7  -1  -1  126.89    6.10
   7  -1  -1  123.99    6.00
   7   1  -1  111.79    5.70
  -7   1   1  126.29    5.60
   7   1  -1  106.29    6.00
  -7   1   1  125.69    6.20
   7   1  -1  122.59    5.00
   7   1  -1  119.49    5.80
   6  -1  -1  257.87    9.50
  -6  -1   1  251.67   10.20
   6  -1  -1  251.07   10.10
   6  -1  -1  241.58   10.20
   6  -1  -1  241.78    9.40
   6  -1  -1  241.38    9.60
   6  -1  -1  222.28   10.50
  -6  -1   1  230.98    9.90
   6   1  -1  253.57   10.20
   6   1  -1  257.47    9.90
  -6   1   1  233.08    9.60
   6   1  -1  246.98    9.90
  -6   1   1  205.38   10.50
   6   1  -1  253.97    9.30
   5  -1  -1   34.50    2.60
   5  -1  -1   30.90    2.00
  -5  -1   1   29.20    2.30
   5  -1  -1   32.90    2.60
  -5  -1   1   31.70    1.70
  -5  -1   1   28.00    2.50
   5  -1  -1   30.80    1.90
  -5   1   1   30.50    2.50
   5   1  -1   33.40    2.20
   5   1  -1   32.70    1.70
   5   1  -1   29.20    2.50
  -5   1   1   30.60    2.00
   5   1  -1   30.00    2.30
   4  -1  -1   57.89    2.80
   4  -1  -1   59.59    2.90
   4  -1  -1   59.89    3.20
   4  -1  -1   58.29    3.30
  -4  -1   1   70.09    2.70
  -4  -1   1   71.69    3.30
  -4   1   1   59.99    3.20
  -4   1   1   56.79    2.90
   4   1  -1   73.29    3.30
   4   1  -1   72.19    3.10
   4   1  -1   69.59    3.40
  -3  -1   1  113.39    4.40
  -3  -1   1  114.99    4.80
   3  -1  -1  110.49    4.50
   3  -1  -1  113.19    4.80
  -3  -1   1  116.79    4.60
   3  -1  -1  109.89    4.50
   3  -1  -1  114.09    4.80
   3   1  -1  117.59    4.40
  -3   1   1  106.09    4.50
   3   1  -1  115.89    4.60
   3   1  -1  120.19    4.80
   3   1  -1  112.69    4.80
  -3   1   1  112.59    4.80
  -2  -1   1  951.10   34.80
   2  -1  -1  931.31   34.80
   2  -1  -1  947.81   34.90
  -2  -1   1  965.10   34.90
  -2  -1   1  951.30   35.10
   2  -1  -1  971.30   35.10
   2  -1  -1  971.30   35.00
  -2   1   1  968.10   34.90
   2   1  -1  980.10   35.10
   2   1  -1  967.80   34.90
  -2   1   1  932.71   34.80
   2   1  -1  961.50   34.80
  -2   1   1  951.30   35.10
  -2   1   1  960.50   35.00
   1  -1  -1   59.19    2.10
   1  -1  -1   59.89    2.40
   1  -1  -1   57.19    2.20
   1  -1  -1   59.19    2.30
  -1  -1   1   51.49    2.30
  -1  -1   1   52.29    2.30
   1   1  -1   49.40    2.10
  -1   1   1   59.49    2.20
   1   1  -1   51.29    2.10
   1   1  -1   52.99    2.30
   1   1  -1   51.69    2.30
  -1   1   1   58.59    2.40
   0  -1  -1   -0.10    0.20
   1  -1   1 1435.16   58.19
   1  -1   1 1476.05   58.29
  -1  -1  -1 1499.75   58.29
   1  -1   1 1786.92   59.19
   1   1   1 1710.83   58.79
   1   1   1 1819.22   58.39
  -1   1  -1 1466.85   58.19
   1   1   1 1514.15   58.29
  -1   1  -1 1500.85   58.29
   1   1   1 1840.52   59.59
  -2  -1  -1 6020.60  210.28
  -2  -1  -1 5562.84  210.28
   2  -1   1 5887.01  210.58
   2  -1   1 5711.33  208.98
   2  -1   1 5551.04  209.38
  -2  -1  -1 5880.71  208.68
   2   1   1 5584.94  209.98
  -2   1  -1 5979.70  210.68
   2   1   1 5911.81  208.68
   2   1   1 5544.55  209.88
  -2   1  -1 5957.60  209.48
  -2   1  -1 5564.84  209.08
   2   1   1 5715.03  210.28
  -3  -1  -1  313.17   12.60
   3  -1   1  322.77   12.20
  -3  -1  -1  321.47   12.50
   3  -1   1  311.27   12.20
  -3  -1  -1  332.97   12.00
   3  -1   1  326.07   12.50
  -3  -1  -1  339.27   12.60
  -3   1  -1  328.37   12.50
   3   1   1  327.77   12.00
   3   1   1  331.37   12.40
   3   1   1  330.77   12.50
   3   1   1  347.57   12.60
  -3   1  -1  335.17   12.20
  -3   1  -1  321.27   12.20
  -4  -1  -1   40.20    2.40
   4  -1   1   40.90    2.60
   4  -1   1   42.70    2.60
  -4  -1  -1   43.20    2.40
  -4  -1  -1   43.20    2.60
   4  -1   1   40.70    2.10
   4  -1   1   42.30    2.00
   4   1   1   45.90    1.80
  -4   1  -1   39.40    2.20
   4   1   1   40.40    2.40
   4   1   1   43.50    2.60
   4   1   1   41.80    2.40
  -4   1  -1   41.20    2.10
  -4   1  -1   44.10    2.60
   5  -1   1  239.08    9.90
   5  -1   1  254.27   10.00
  -5  -1  -1  250.87    9.80
   5  -1   1  238.68    9.30
  -5  -1  -1  243.88   10.00
  -5  -1  -1  231.98    9.80
   5  -1   1  245.18    9.50
   5   1   1  243.88    9.80
   5   1   1  241.88    9.90
  -5   1  -1  234.08    9.50
   5   1   1  250.97    9.10
  -5   1  -1  239.38    9.90
   5   1   1  251.97    9.80
  -6  -1  -1   49.50    3.30
  -6  -1  -1   47.60    3.60
   6  -1   1   59.29    3.70
   6  -1   1   59.59    3.00
   6  -1   1   61.39    2.80
   6  -1   1   62.79    3.80
   6  -1   1   60.09    3.60
  -6   1  -1   58.39    3.70
   6   1   1   54.19    2.50
   6   1   1   52.49    2.40
   6   1   1   54.39    3.30
  -6   1  -1   57.09    3.10
   6   1   1   54.69    3.70
   6   1   1   48.10    4.00
   7  -1   1   39.20    2.60
   7  -1   1   38.90    2.40
   7  -1   1   39.80    2.30
  -7  -1  -1   38.30    3.10
  -7  -1  -1   39.10    3.40
   7  -1   1   39.30    3.40
   7  -1   1   36.50    3.10
   7  -1   1   40.40    3.60
  -7   1  -1   40.20    3.30
   7   1   1   40.30    3.10
   7   1   1   44.60    3.10
   7   1   1   38.80    3.50
   7   1   1   39.80    2.20
   7   1   1   40.40    2.00
  -7   1  -1   37.90    2.70
   8  -1   1   83.99    3.90
  -8  -1  -1   89.89    5.20
   8  -1   1   83.19    4.90
   8  -1   1   84.29    4.10
  -8  -1  -1   83.19    4.70
   8  -1   1   84.89    4.40
   8   1   1   81.59    3.70
  -8   1  -1   74.39    5.00
   8   1   1   83.59    3.60
   8   1   1   86.59    4.80
   8   1   1   81.59    4.70
   9  -1   1    0.50    1.20
   9  -1   1    2.50    1.90
   9  -1   1    1.20    2.00
  -9  -1  -1    1.30    1.80
   9  -1   1    0.40    1.40
  -9  -1  -1    1.30    1.90
   9   1   1    4.60    2.30
  -9   1  -1    2.30    1.80
   9   1   1    0.50    2.00
   9   1   1    0.70    0.90
  -9   1  -1    1.20    2.00
   9   1   1    0.80    1.00
  10  -1   1   30.40    4.00
  10  -1   1   36.50    3.70
 -10  -1  -1   43.00    3.90
  10  -1   1   29.70    2.90
 -10   1  -1   22.90    3.50
  10   1   1   29.60    2.30
  10   1   1   38.50    4.00
  10   1   1   30.80    2.20
 -10   1  -1   35.30    3.60
  11  -1   1   28.70    3.10
  11  -1   1   32.90    4.40
  11  -1   1   32.10    3.00
 -11  -1  -1   32.00    4.00
 -11   1  -1   26.70    4.00
  11   1   1   28.40    2.40
  11   1   1   24.40    2.40
 -11   1  -1   32.20    3.90
  11   1   1   29.50    4.30
  12  -1   1    1.90    2.20
  12  -1   1    6.20    3.60
  12  -1   1   -3.50    2.20
 -12  -1  -1    1.70    3.00
 -12   1  -1    3.50    2.80
  12   1   1   -1.40    1.50
  12   1   1   -1.30    3.10
  12   1   1    1.80    1.60
 -12   1  -1    2.90    2.90
  13  -1   1    6.80    4.50
  13  -1   1    4.00    2.60
 -13  -1  -1   11.30    3.90
 -13   1  -1   10.00    4.10
  13   1   1    8.70    4.20
 -13   1  -1    5.90    3.70
  13   1   1    7.50    2.00
  14  -1   1    2.40    5.40
  14  -1   1    7.40    3.20
 -14  -1  -1    5.00    4.30
 -14   1  -1    8.20    4.40
 -14   1  -1   11.60    5.20
  14   1   1    0.60    4.60
  15  -1   1   -0.40    5.50
 -15  -1  -1   11.80    5.80
 -15   1  -1    0.40    5.20
  15   1   1   -2.50    5.20
  16  -1   1   -2.10    6.70
  16   1   1   -6.60    6.00
 -16   1  -1    5.10    6.20
 -16  -2   1   -2.30    6.60
  16   2  -1   -5.10    5.60
  15  -2  -1    4.80    5.50
 -15  -2   1   14.30    5.60
 -15   2   1    1.10    4.90
  14  -2  -1   -2.70    3.40
 -14  -2   1   -2.80    4.50
  14   2  -1   -2.50    4.40
 -14   2   1   -3.70    3.90
 -13  -2   1    5.90    3.70
  13  -2  -1    3.50    4.20
  13  -2  -1    9.80    3.30
 -13   2   1    3.10    3.70
  13   2  -1    3.30    3.90
 -13   2   1    4.30    3.50
  13   2  -1    0.00    1.80
  12  -2  -1   47.30    4.00
  12  -2  -1   34.20    4.60
 -12  -2   1   50.99    5.40
  12  -2  -1   41.20    5.10
  12   2  -1   42.80    5.10
 -12   2   1   46.40    5.50
  12   2  -1   43.30    3.10
 -12   2   1   41.50    5.00
  12   2  -1   30.90    3.00
  11  -2  -1   42.60    4.90
 -11  -2   1   44.20    4.60
  11  -2  -1   43.70    3.40
  11  -2  -1   35.30    4.30
  11  -2  -1   50.99    4.30
  11   2  -1   49.00    4.60
 -11   2   1   39.00    5.10
  11   2  -1   36.30    2.70
 -11   2   1   34.60    4.30
  11   2  -1   33.20    2.70
  10  -2  -1    1.60    1.60
  10  -2  -1    2.00    2.20
  10  -2  -1    3.70    2.10
  10  -2  -1   -2.10    2.50
 -10  -2   1    2.40    2.30
  10   2  -1    2.30    1.30
  10   2  -1   -0.90    1.10
 -10   2   1   -2.30    2.10
 -10   2   1    1.50    2.10
  10   2  -1    1.00    2.30
   9  -2  -1    2.50    1.70
   9  -2  -1    1.00    2.00
   9  -2  -1    5.10    1.90
   9  -2  -1    0.50    1.40
  -9  -2   1   -2.80    1.70
  -9   2   1    1.00    2.00
   9   2  -1   -0.10    1.10
   9   2  -1    2.40    2.00
  -8  -2   1    2.30    1.70
   8  -2  -1    5.40    2.10
   8  -2  -1    4.20    1.60
   8  -2  -1    1.50    1.50
   8  -2  -1    4.80    1.60
   8   2  -1    3.20    1.80
   8   2  -1    1.70    1.00
   8   2  -1    1.60    2.10
  -8   2   1    5.20    1.70
  -8   2   1    2.20    1.60
  -7  -2   1   15.10    2.20
   7  -2  -1    9.20    1.80
   7  -2  -1   14.40    1.80
   7  -2  -1   16.00    2.80
   7  -2  -1   13.10    1.60
   7   2  -1   16.00    2.20
  -7   2   1   13.40    2.10
   7   2  -1   11.10    1.30
   7   2  -1   10.80    2.00
  -7   2   1   14.50    1.90
   7   2  -1   12.50    2.30
   6  -2  -1    3.20    2.00
  -6  -2   1    2.80    1.60
   6  -2  -1    2.40    1.00
   6  -2  -1    3.10    1.10
   6  -2  -1    3.00    1.50
  -6  -2   1    1.50    0.80
   6   2  -1   -0.50    1.40
  -6   2   1    3.00    1.10
  -6   2   1    5.10    1.70
   6   2  -1    2.70    1.40
   6   2  -1    0.80    1.60
   5  -2  -1   12.70    1.50
   5  -2  -1   14.50    2.10
   5  -2  -1   14.20    2.10
  -5  -2   1   10.30    1.60
  -5  -2   1    8.30    1.00
   5  -2  -1    9.00    1.30
  -5  -2   1    9.20    1.70
   5   2  -1    9.60    1.10
   5   2  -1   11.70    1.60
  -5   2   1   14.40    1.80
  -5   2   1   13.20    1.40
   5   2  -1    9.60    1.80
   5   2  -1    9.20    1.70
  -4  -2   1  927.41   35.70
   4  -2  -1 1005.40   35.70
   4  -2  -1  964.30   35.40
  -4  -2   1  903.81   35.10
   4  -2  -1  983.70   35.20
  -4  -2   1  956.80   35.50
   4  -2  -1  992.00   35.90
  -4   2   1  954.20   35.20
   4   2  -1  933.71   35.10
   4   2  -1  989.70   35.80
  -4   2   1 1014.20   35.50
   4   2  -1  959.90   35.80
   4   2  -1  921.01   35.40
  -4   2   1  966.60   35.70
  -4   2   1  985.70   35.90
   3  -2  -1    4.60    0.80
  -3  -2   1    1.70    0.90
  -3  -2   1    2.70    0.70
   3  -2  -1    6.00    1.30
  -3  -2   1    7.30    0.80
   3  -2  -1    4.50    0.60
   3   2  -1    3.70    0.60
   3   2  -1    3.50    1.10
   3   2  -1    2.90    0.80
   3   2  -1    4.90    0.80
  -3   2   1    4.90    1.10
  -3   2   1    5.20    0.90
  -2  -2   1 1269.47   45.90
  -2  -2   1 1274.47   45.90
   2  -2  -1 1213.48   46.00
  -2  -2   1 1272.27   46.20
   2  -2  -1 1207.18   45.70
  -2  -2   1 1326.07   46.20
   2  -2  -1 1255.47   46.30
   2  -2  -1 1272.27   46.10
  -2   2   1 1250.57   46.10
   2   2  -1 1262.87   46.20
  -2   2   1 1252.77   46.20
   2   2  -1 1252.07   45.90
   2   2  -1 1270.87   46.20
   2   2  -1 1276.77   45.90
   1  -2  -1    5.00    0.70
  -1  -2   1    6.30    0.80
   1  -2  -1    6.50    0.90
  -1  -2   1    6.00    0.80
   1  -2  -1    5.10    0.50
   1  -2  -1    8.10    1.00
  -1  -2   1    5.20    0.60
  -1   2   1    7.00    0.90
   1   2  -1    4.40    0.60
   1   2  -1    7.20    0.90
  -1   2   1    5.60    0.70
  -1   2   1    5.90    0.60
   1   2  -1    7.00    0.90
  -1   2   1    5.30    0.80
   0  -2   1 4387.86  168.28
   0  -2   1 4801.22  168.58
   0  -2  -1 4640.44  168.28
   0  -2  -1 4809.12  168.88
   0  -2  -1 4613.04  168.38
   0  -2   1 4833.82  169.18
   0  -2  -1 4685.73  168.58
   0  -2   1 4408.96  168.28
   0   2   1 4626.24  168.28
   0   2  -1 4512.15  168.08
   0   2   1 4649.13  168.48
   0   2   1 4466.35  168.38
   0   2   1 4529.55  168.18
   0   2  -1 4651.73  168.48
   0   2  -1 4716.23  169.28
   0   2  -1 4486.05  168.08
   1  -2   1    1.40    0.70
  -1  -2  -1    1.20    0.60
   1  -2   1    1.50    0.30
   1  -2   1    2.60    0.60
  -1  -2  -1    1.40    0.40
  -1  -2  -1   -0.50    0.50
   1  -2   1    1.10    0.60
  -1  -2  -1    0.50    0.60
  -1   2  -1    1.30    0.50
  -1   2  -1    0.90    0.30
   1   2   1    0.00    0.50
   1   2   1    1.60    0.40
  -1   2  -1    0.70    0.60
   1   2   1    0.50    0.50
   1   2   1    0.30    0.60
  -1   2  -1    2.10    0.60
  -2  -2  -1 4047.40  155.58
  -2  -2  -1 4486.55  154.78
  -2  -2  -1 4505.55  155.58
   2  -2   1 4511.35  157.68
   2  -2   1 3911.11  154.88
   2   2   1 4482.65  155.98
  -2   2  -1 4291.87  156.08
  -2   2  -1 4300.07  155.98
   2   2   1 3688.53  154.28
   2   2   1 4372.36  156.68
   2   2   1 4207.18  154.58
  -3  -2  -1    1.30    0.80
  -3  -2  -1    0.60    0.40
   3  -2   1    3.20    1.10
   3  -2   1    2.50    0.80
  -3  -2  -1   -0.10    0.80
   3  -2   1    3.20    0.70
   3  -2   1    1.40    0.40
   3   2   1    0.70    0.40
  -3   2  -1    3.50    0.90
  -3   2  -1    1.60    0.40
   3   2   1    0.80    0.90
   3   2   1    1.60    0.80
  -3   2  -1    2.00    0.70
   4  -2   1  253.47    9.90
   4  -2   1  238.48    9.20
   4  -2   1  233.28    9.50
   4  -2   1  246.18   10.00
  -4  -2  -1  248.68    9.70
  -4  -2  -1  245.88    9.90
  -4  -2  -1  248.08    9.10
   4   2   1  256.37    9.10
  -4   2  -1  251.07    9.50
  -4   2  -1  235.98    9.30
   4   2   1  255.97    9.90
  -4   2  -1  248.58    9.90
   4   2   1  244.28    9.60
   4   2   1  250.37    9.90
  -5  -2  -1   70.09    3.50
   5  -2   1   59.59    3.00
  -5  -2  -1   64.39    3.70
   5  -2   1   64.29    3.20
   5  -2   1   71.79    4.00
   5  -2   1   67.09    3.80
  -5  -2  -1   65.29    2.70
   5   2   1   72.09    3.50
  -5   2  -1   69.19    3.90
   5   2   1   69.69    3.80
   5   2   1   69.29    2.70
  -5   2  -1   63.19    3.10
   5   2   1   66.99    3.70
  -5   2  -1   65.09    3.20
  -6  -2  -1   21.50    2.50
   6  -2   1   24.10    2.70
   6  -2   1   28.00    2.80
   6  -2   1   26.70    1.90
   6  -2   1   24.60    1.80
  -6  -2  -1   21.80    2.50
   6  -2   1   26.40    2.90
   6   2   1   23.40    2.60
   6   2   1   23.90    2.80
   6   2   1   23.70    2.40
  -6   2  -1   25.50    1.90
  -6   2  -1   23.70    2.70
   6   2   1   24.90    1.40
   7  -2   1    2.00    1.50
   7  -2   1    2.70    1.80
  -7  -2  -1    3.60    1.60
   7  -2   1    2.20    1.10
   7  -2   1    3.00    2.10
  -7  -2  -1    4.00    1.70
   7  -2   1    4.40    1.20
   7   2   1    4.20    1.80
   7   2   1    3.00    0.70
  -7   2  -1    4.10    1.60
  -7   2  -1    2.20    1.20
   7   2   1    3.60    1.90
   7   2   1    2.70    1.60
   8  -2   1    0.40    1.20
  -8  -2  -1   -1.10    1.60
   8  -2   1   -0.20    1.80
   8  -2   1    1.50    1.40
   8   2   1   -0.80    0.70
  -8   2  -1    0.00    1.40
   8   2   1    0.50    1.80
   8   2   1    2.80    2.00
  -8   2  -1    0.00    1.50
   8   2   1   -0.30    0.70
   9  -2   1   27.40    2.80
   9  -2   1   19.40    2.70
  -9  -2  -1   27.90    3.50
   9  -2   1   20.40    2.50
   9  -2   1   18.80    3.10
   9   2   1   25.90    3.30
   9   2   1   27.60    1.70
  -9   2  -1   20.20    3.00
  10  -2   1  103.59    5.60
  10  -2   1  102.39    5.60
 -10  -2  -1  105.99    6.30
  10  -2   1  110.49    5.20
  10  -2   1  120.39    6.70
 -10   2  -1  118.29    5.80
 -10   2  -1   85.19    6.60
  10   2   1  102.59    6.30
  10   2   1  107.29    4.50
  11  -2   1    2.70    3.00
  11  -2   1    2.40    1.80
 -11  -2  -1    9.20    2.90
  11  -2   1    9.50    2.80
  11  -2   1    3.90    2.30
  11   2   1    0.70    1.10
 -11   2  -1    2.00    2.50
  11   2   1   -1.10    2.80
 -11   2  -1   -0.50    2.60
  12  -2   1   62.29    5.20
 -12  -2  -1   83.59    6.30
  12  -2   1   79.59    5.00
  12  -2   1   67.99    6.50
 -12   2  -1   63.99    6.80
 -12   2  -1   84.89    5.80
  12   2   1   76.29    3.80
  12   2   1   76.79    6.10
  13  -2   1    6.70    4.30
 -13  -2  -1    4.30    4.00
  13  -2   1    2.20    2.70
 -13   2  -1    6.30    4.00
 -13   2  -1    1.40    3.60
  13   2   1    1.20    3.80
  14  -2   1    7.10    3.70
  14  -2   1   11.70    6.70
 -14  -2  -1   19.30    5.00
  14   2   1    8.70    4.90
 -14   2  -1    7.00    4.30
 -14   2  -1    3.60    4.50
  15  -2   1    0.30    5.80
 -15  -2  -1   12.80    5.70
  15   2   1    8.70    5.70
 -15   2  -1    5.10    5.30
 -15   2  -1   12.90    5.70
 -16  -2  -1   44.20    8.90
  16  -2   1   21.80    7.60
  16   2   1   36.40    7.20
  16  -3  -1    1.40    7.00
 -16  -3   1    6.90    6.70
  16   3  -1   -6.20    5.10
  16   3  -1   -5.40    6.10
 -16   3   1   -2.00    6.10
  15  -3  -1   -4.70    4.70
  15  -3  -1   11.30    6.40
 -15  -3   1    6.70    6.20
 -15   3   1   -5.00    5.60
  15   3  -1    6.30    5.30
  15   3  -1   -2.60    4.70
 -14  -3   1   54.49    7.10
  14  -3  -1   49.00    7.30
  14  -3  -1   63.69    6.70
  14   3  -1   54.99    7.30
 -14   3   1   40.80    6.60
  14   3  -1   47.30    6.80
  13  -3  -1   -5.70    3.90
 -13  -3   1    4.50    4.10
  13  -3  -1    4.20    2.80
  13   3  -1    5.10    4.00
  13   3  -1    2.90    1.70
  13   3  -1    3.40    3.70
 -13   3   1   -1.90    3.20
  12  -3  -1   29.20    3.80
  12  -3  -1   26.50    4.60
 -12  -3   1   35.80    4.70
  12  -3  -1   36.40    4.60
 -12   3   1   30.10    4.70
  12   3  -1   28.10    2.60
  12   3  -1   34.20    4.70
  12   3  -1   21.80    2.50
 -11  -3   1    0.80    2.90
  11  -3  -1    2.10    2.00
  11  -3  -1    6.80    2.60
  11  -3  -1    4.90    3.00
 -11   3   1    6.00    3.10
  11   3  -1    3.00    1.40
  11   3  -1    2.80    1.30
 -11   3   1    4.10    2.60
  11   3  -1    4.90    2.90
  10  -3  -1   63.39    4.70
  10  -3  -1   67.69    4.10
 -10  -3   1   69.39    5.20
  10  -3  -1   68.69    5.30
  10  -3  -1   63.49    4.00
 -10   3   1   63.89    5.40
  10   3  -1   61.59    4.80
  10   3  -1   57.19    3.20
  -9  -3   1   -0.10    2.10
   9  -3  -1    3.40    1.70
   9  -3  -1    2.00    1.50
   9  -3  -1    0.10    2.30
  -9   3   1    0.80    1.90
  -9   3   1    1.90    1.70
   9   3  -1    2.50    2.10
   9   3  -1    1.50    1.10
  -8  -3   1  152.38    7.60
   8  -3  -1  162.88    6.60
  -8  -3   1  155.68    6.30
   8  -3  -1  160.88    6.90
   8   3  -1  156.98    7.20
  -8   3   1  146.39    7.60
  -8   3   1  157.68    6.70
   8   3  -1  154.48    6.20
   7  -3  -1    1.30    1.90
  -7  -3   1    0.50    1.60
   7  -3  -1    1.20    1.20
  -7  -3   1    1.50    0.90
   7  -3  -1    0.20    2.20
   7  -3  -1    2.20    1.10
  -7   3   1   -0.10    1.40
   7   3  -1   -3.20    1.80
  -7   3   1    1.60    1.20
   7   3  -1   -0.20    1.60
   7   3  -1    1.90    0.90
   7   3  -1    2.80    2.00
   6  -3  -1    6.80    1.80
   6  -3  -1    4.00    1.00
  -6  -3   1    5.40    1.00
  -6  -3   1    5.20    1.70
  -6  -3   1    6.00    1.60
   6  -3  -1    5.50    2.00
   6   3  -1    5.00    0.90
   6   3  -1    4.90    1.60
   6   3  -1    5.40    1.40
  -6   3   1    7.30    1.70
   6   3  -1    5.30    1.50
   6   3  -1    6.20    2.00
   5  -3  -1  943.21   34.90
   5  -3  -1 1019.80   35.70
  -5  -3   1  831.42   36.10
  -5  -3   1  958.70   35.30
   5  -3  -1  941.21   35.30
  -5  -3   1  938.91   35.00
   5  -3  -1  990.20   36.00
   5   3  -1  943.31   35.30
   5   3  -1  925.61   35.80
  -5   3   1 1023.10   35.40
   5   3  -1  955.90   35.80
   5   3  -1  971.10   35.80
  -5   3   1  977.00   35.70
   4  -3  -1  306.77   11.30
   4  -3  -1  291.57   11.00
  -4  -3   1  272.17   10.90
  -4  -3   1  260.27   11.30
  -4  -3   1  280.87   10.70
   4  -3  -1  293.57   10.50
   4  -3  -1  297.17   11.60
   4  -3  -1  284.37   10.50
  -4   3   1  285.47   11.50
   4   3  -1  265.97   10.90
   4   3  -1  263.57   11.30
  -4   3   1  296.47   11.30
  -4   3   1  303.17   11.10
   4   3  -1  277.17   11.30
  -3  -3   1  217.28    8.30
   3  -3  -1  222.08    8.70
   3  -3  -1  215.58    8.00
  -3  -3   1  212.08    8.80
   3  -3  -1  210.78    8.50
   3  -3  -1  223.38    8.90
  -3  -3   1  229.08    8.80
  -3  -3   1  219.88    8.30
   3  -3  -1  217.48    8.00
  -3   3   1  230.58    8.60
  -3   3   1  213.18    8.80
   3   3  -1  197.28    8.40
   3   3  -1  219.28    8.80
  -3   3   1  221.28    8.70
   3   3  -1  211.58    8.70
   3   3  -1  211.88    8.30
   2  -3  -1    8.70    0.70
   2  -3  -1   10.90    1.40
  -2  -3   1   11.40    1.00
  -2  -3   1   10.70    1.00
  -2  -3   1   10.60    1.30
   2  -3  -1    9.90    1.20
   2  -3  -1   13.30    1.60
  -2  -3   1   12.70    1.50
   2   3  -1   12.90    1.50
  -2   3   1    9.80    1.40
  -2   3   1    9.70    1.30
   2   3  -1   10.60    1.00
  -2   3   1   11.00    0.70
   2   3  -1   11.50    1.40
  -2   3   1    9.10    1.20
   1  -3  -1  523.45   18.90
  -1  -3   1  489.35   18.60
   1  -3  -1  501.15   18.50
   1  -3  -1  495.05   18.70
  -1  -3   1  503.55   18.60
  -1  -3   1  526.15   18.90
  -1   3   1  510.35   18.50
   1   3  -1  507.05   18.90
  -1   3   1  496.55   18.80
   1   3  -1  473.05   18.80
  -1   3   1  509.75   18.70
   1   3  -1  502.35   18.60
  -1   3   1  516.65   18.90
   0  -3  -1    8.80    0.90
   0  -3   1    8.50    1.20
   0  -3  -1   10.10    1.00
   0  -3   1    9.00    1.00
   0  -3  -1    8.30    1.10
   0  -3   1    8.50    0.90
   0  -3   1    8.00    1.00
   0   3   1    9.90    1.00
   0   3  -1    7.50    1.00
   0   3  -1    8.40    0.90
   0   3  -1    8.00    1.20
   0   3   1    7.90    1.10
   0   3  -1    9.10    1.00
   0   3   1    9.50    1.00
   0   3   1    8.90    1.20
  -1  -3  -1  130.99    5.20
  -1  -3  -1  128.09    5.00
  -1  -3  -1  123.79    4.90
   1  -3   1  117.29    5.00
   1  -3   1  122.89    5.20
   1  -3   1  120.49    4.70
  -1  -3  -1  121.89    5.10
   1   3   1  131.89    5.20
   1   3   1  129.39    4.90
   1   3   1  125.09    5.00
  -1   3  -1  122.89    5.10
  -1   3  -1  120.89    5.00
  -1   3  -1  120.19    4.70
  -1   3  -1  120.19    5.20
   1   3   1  124.09    5.10
  -2  -3  -1   51.09    2.40
   2  -3   1   57.19    2.90
  -2  -3  -1   49.20    2.70
   2  -3   1   60.99    2.90
  -2  -3  -1   52.19    2.80
   2  -3   1   56.49    2.60
  -2  -3  -1   53.59    2.80
   2   3   1   52.49    2.50
   2   3   1   50.29    2.80
   2   3   1   53.29    2.40
   2   3   1   51.79    2.70
  -2   3  -1   57.19    2.80
  -2   3  -1   56.29    2.80
  -2   3  -1   58.49    2.60
   3  -3   1   77.59    4.00
  -3  -3  -1   84.69    3.30
  -3  -3  -1   82.59    3.90
   3  -3   1   78.49    3.90
  -3  -3  -1   91.09    3.60
   3  -3   1   69.39    3.50
  -3   3  -1   70.89    3.90
   3   3   1   85.39    3.90
   3   3   1   81.69    3.90
   3   3   1   85.29    3.60
  -3   3  -1   75.19    3.60
   3   3   1   86.59    3.30
  -3   3  -1   72.39    3.80
   4  -3   1  189.18    7.70
   4  -3   1  193.68    8.30
  -4  -3  -1  201.88    7.40
  -4  -3  -1  197.28    7.80
  -4  -3  -1  186.18    8.10
   4  -3   1  200.08    8.20
   4  -3   1  183.08    7.20
   4   3   1  194.48    8.10
   4   3   1  197.98    7.80
   4   3   1  194.68    8.20
   4   3   1  197.28    7.30
  -4   3  -1  191.78    8.20
  -4   3  -1  197.18    7.80
  -5  -3  -1  225.18    9.10
   5  -3   1  220.98    8.50
   5  -3   1  221.98    9.60
  -5  -3  -1  216.98    9.60
   5  -3   1  228.68    9.50
  -5  -3  -1  232.18    8.50
   5  -3   1  221.78    9.00
   5   3   1  231.68    9.60
   5   3   1  235.88    8.50
   5   3   1  231.38    9.20
   5   3   1  230.48    9.60
  -5   3  -1  224.48    9.00
   5   3   1  230.68    9.50
  -5   3  -1  220.98    8.60
   6  -3   1  258.37    9.60
  -6  -3  -1  237.48   10.60
   6  -3   1  258.37   10.70
  -6  -3  -1  243.18   10.20
   6  -3   1  263.77   10.90
   6  -3   1  258.37   10.10
  -6  -3  -1  251.07    9.50
  -6   3  -1  262.07   10.70
   6   3   1  249.18    9.50
   6   3   1  237.38   10.60
   6   3   1  250.57   10.60
   6   3   1  245.78   10.30
  -6   3  -1  252.57    9.70
  -6   3  -1  271.37   10.10
   7  -3   1   41.40    3.90
   7  -3   1   53.79    4.30
  -7  -3  -1   49.20    3.70
   7  -3   1   47.00    3.10
  -7  -3  -1   47.00    2.30
   7  -3   1   42.60    3.70
   7  -3   1   47.60    2.60
  -7  -3  -1   47.30    3.50
   7   3   1   48.80    2.20
   7   3   1   49.10    4.10
  -7   3  -1   43.80    3.60
   7   3   1   52.69    3.60
   7   3   1   50.89    3.30
  -7   3  -1   45.00    2.70
  -8  -3  -1   96.39    5.50
  -8  -3  -1   91.49    5.30
   8  -3   1   99.49    5.70
   8  -3   1   90.69    4.40
   8  -3   1   97.09    4.60
   8   3   1   94.09    5.10
  -8   3  -1   83.49    5.50
   8   3   1   95.39    3.80
  -8   3  -1   94.69    4.50
   9  -3   1   11.90    2.90
   9  -3   1   12.50    1.90
  -9  -3  -1    6.30    2.50
   9  -3   1   11.30    1.80
  -9   3  -1    8.50    2.00
  -9   3  -1    5.70    2.30
   9   3   1    6.60    1.00
   9   3   1    8.60    1.00
   9   3   1   11.30    2.50
  10  -3   1    1.10    1.80
  10  -3   1    3.50    2.00
  10  -3   1    0.20    2.40
 -10  -3  -1    1.00    2.50
 -10   3  -1    1.50    2.50
  10   3   1    2.50    2.40
  10   3   1   -1.20    0.80
  10   3   1   -1.50    0.90
  11  -3   1    8.40    3.50
 -11  -3  -1    7.70    3.20
  11  -3   1    3.70    2.10
  11  -3   1    9.20    2.70
  11  -3   1    5.80    3.10
 -11   3  -1    2.80    2.70
  11   3   1    5.10    2.90
 -11   3  -1    2.90    2.80
  12  -3   1   12.20    2.70
  12  -3   1   17.30    3.70
 -12  -3  -1   18.20    4.00
  12  -3   1   15.70    4.20
 -12   3  -1    8.10    3.50
 -12   3  -1   15.80    3.60
  12   3   1   16.00    3.80
  13  -3   1    2.60    2.90
  13  -3   1   11.10    4.80
 -13  -3  -1    6.00    4.10
 -13   3  -1    0.00    3.80
  13   3   1    5.50    3.90
 -13   3  -1    7.70    3.80
  14  -3   1    5.00    5.30
 -14  -3  -1   12.30    5.10
  14  -3   1   13.20    4.20
 -14   3  -1   13.40    4.60
 -14   3  -1    8.60    5.00
  14   3   1    1.10    4.70
  15  -3   1    5.20    6.00
 -15  -3  -1    1.20    6.60
  15   3   1    2.70    4.90
 -15   3  -1   -3.90    4.90
  15   3   1   -0.30    6.70
 -16  -3  -1   11.60    6.90
  16  -3   1    2.40    7.40
  16   3   1   12.10    6.50
 -16   3  -1   20.30    6.80
  16   3   1    0.00    6.10
  16  -4  -1    1.00    7.50
 -16  -4   1    7.20    7.10
  16   4  -1   -6.00    5.80
 -16   4   1   -2.10    6.80
  16   4  -1    0.70    6.10
  15  -4  -1   33.10    6.00
  15  -4  -1   30.50    7.30
 -15  -4   1   29.30    7.40
  15   4  -1   21.50    5.80
  15   4  -1   29.70    6.20
 -15   4   1   29.50    6.80
  14  -4  -1   13.80    4.30
  14  -4  -1    3.90    5.60
  14   4  -1   19.60    5.20
  14   4  -1    3.90    4.80
 -14   4   1   17.50    5.30
  13  -4  -1    2.40    3.20
 -13  -4   1    6.50    4.40
  13  -4  -1    6.70    4.50
  13   4  -1   -2.50    3.70
 -13   4   1    0.00    3.90
  13   4  -1    4.30    4.00
  12  -4  -1    2.10    4.00
 -12  -4   1    3.20    3.60
  12  -4  -1    7.70    2.90
  12   4  -1    4.90    3.40
 -12   4   1    8.30    3.80
  12   4  -1    3.40    1.50
  12   4  -1    4.30    3.50
  11  -4  -1    1.40    2.00
  11  -4  -1    1.30    3.40
  11  -4  -1    4.50    2.40
 -11  -4   1   -2.30    3.00
 -11   4   1    2.20    3.00
  11   4  -1    3.00    2.70
  11   4  -1    1.40    1.40
  11   4  -1    1.30    2.80
  10  -4  -1    7.90    3.50
  10  -4  -1    5.90    2.00
  10  -4  -1    8.10    2.00
 -10  -4   1   11.60    3.00
 -10   4   1    1.90    2.30
  10   4  -1    7.70    2.70
  10   4  -1    7.80    1.40
  10   4  -1    8.70    2.70
  -9  -4   1   28.30    3.70
   9  -4  -1   28.00    2.40
   9  -4  -1   27.20    3.00
  -9  -4   1   28.10    2.30
   9   4  -1   32.10    3.50
   9   4  -1   32.40    4.00
   9   4  -1   30.20    2.30
  -9   4   1   23.20    3.20
  -8  -4   1   16.00    1.70
  -8  -4   1   14.60    2.90
   8  -4  -1   15.50    1.70
   8  -4  -1   19.30    2.30
   8   4  -1   12.60    1.70
  -8   4   1   10.80    2.40
   8   4  -1   12.90    2.50
   8   4  -1   15.10    2.40
  -7  -4   1   34.80    3.00
   7  -4  -1   32.60    1.90
   7  -4  -1   27.00    3.50
   7  -4  -1   30.10    2.70
  -7  -4   1   38.80    3.50
  -7  -4   1   36.40    2.20
  -7   4   1   31.10    3.30
   7   4  -1   29.30    3.20
   7   4  -1   38.50    2.10
   6  -4  -1  111.89    4.50
  -6  -4   1  118.29    5.20
   6  -4  -1  103.79    5.80
   6  -4  -1  108.59    6.00
  -6  -4   1  108.69    5.70
   6  -4  -1  108.59    4.40
  -6  -4   1  118.99    4.70
   6  -4  -1  111.59    5.20
   6   4  -1  109.59    5.20
  -6   4   1  113.89    5.30
   6   4  -1  110.89    5.80
   6   4  -1  114.89    5.90
  -6   4   1  113.39    5.80
   6   4  -1  109.59    5.80
   6   4  -1  119.59    4.70
   5  -4  -1   99.79    4.70
   5  -4  -1  103.79    5.40
  -5  -4   1  104.79    4.30
   5  -4  -1   97.99    5.10
  -5  -4   1   98.49    5.20
  -5  -4   1  106.49    4.60
   5  -4  -1   99.69    3.80
   5  -4  -1   90.39    3.80
  -5   4   1   97.19    5.30
  -5   4   1   98.29    5.50
   5   4  -1  100.99    5.20
   5   4  -1  103.39    4.60
  -5   4   1   99.69    4.80
   5   4  -1  107.09    4.20
   5   4  -1  101.99    5.20
  -4  -4   1    2.20    0.90
   4  -4  -1    0.80    1.20
   4  -4  -1    2.00    1.20
  -4  -4   1    2.10    1.10
   4  -4  -1    0.70    1.60
  -4   4   1    1.50    1.30
   4   4  -1    0.40    1.60
   4   4  -1    1.00    1.00
  -4   4   1    2.70    1.20
   4   4  -1    1.40    0.80
   3  -4  -1   92.19    4.40
  -3  -4   1   89.99    4.50
   3  -4  -1   95.99    4.70
  -3  -4   1   98.19    4.70
   3  -4  -1   93.29    4.30
  -3  -4   1   98.19    4.00
   3  -4  -1   83.99    3.50
   3   4  -1   97.09    4.00
   3   4  -1   95.39    4.50
  -3   4   1   87.59    4.60
   3   4  -1   92.89    4.00
  -3   4   1   92.79    4.50
  -3   4   1   94.09    4.30
   3   4  -1   93.79    4.60
   2  -4  -1   11.10    1.60
   2  -4  -1    7.40    0.80
   2  -4  -1   15.10    1.90
  -2  -4   1    9.30    1.40
  -2  -4   1    9.10    1.20
   2  -4  -1    9.60    1.20
  -2  -4   1   10.60    1.30
  -2  -4   1   13.40    1.60
  -2   4   1   13.40    1.70
   2   4  -1   12.80    1.60
  -2   4   1   10.20    1.60
  -2   4   1   10.20    0.90
   2   4  -1   11.80    1.50
   2   4  -1   10.10    1.20
  -2   4   1   11.60    1.40
   2   4  -1    9.40    1.10
   1  -4  -1   55.59    2.90
   1  -4  -1   61.49    3.10
   1  -4  -1   61.59    3.00
  -1  -4   1   58.89    2.80
   1  -4  -1   57.99    2.60
  -1  -4   1   57.29    3.00
  -1  -4   1   62.39    3.20
  -1  -4   1   60.49    2.80
   1   4  -1   58.49    3.00
   1   4  -1   58.79    2.80
  -1   4   1   60.19    2.60
  -1   4   1   59.29    3.10
   1   4  -1   60.59    2.80
  -1   4   1   60.69    3.10
  -1   4   1   64.29    3.00
   1   4  -1   62.89    3.20
   0  -4   1    9.80    1.50
   0  -4  -1    6.20    1.00
   0  -4  -1    6.70    1.00
   0  -4   1    7.80    1.00
   0  -4  -1   10.30    1.20
   0  -4   1    6.40    1.00
   0  -4  -1   11.10    1.40
   0  -4   1    8.20    1.00
   0   4   1    5.40    1.10
   0   4  -1    8.60    1.10
   0   4  -1    8.00    1.20
   0   4  -1    8.60    1.10
   0   4   1    9.00    1.10
   0   4   1    9.20    1.30
   0   4   1    7.50    1.20
   1  -4   1  447.56   16.20
   1  -4   1  413.86   15.80
  -1  -4  -1  416.56   16.10
  -1  -4  -1  433.06   16.20
   1  -4   1  409.96   16.00
  -1  -4  -1  432.26   16.00
   1  -4   1  435.36   16.20
  -1  -4  -1  406.96   15.90
   1   4   1  430.06   15.90
   1   4   1  425.96   16.00
  -1   4  -1  427.16   16.00
  -1   4  -1  412.06   16.20
   1   4   1  431.66   16.10
   1   4   1  423.56   16.20
  -1   4  -1  425.36   15.70
  -1   4  -1  432.56   16.20
   2  -4   1    0.20    0.90
   2  -4   1    0.60    0.80
  -2  -4  -1   -1.00    0.90
  -2  -4  -1   -0.10    0.90
  -2  -4  -1    0.60    0.90
   2  -4   1    0.00    0.40
  -2  -4  -1    0.80    0.70
   2  -4   1    1.90    1.20
   2   4   1   -0.50    0.90
   2   4   1    0.60    0.90
  -2   4  -1   -1.00    1.00
   2   4   1   -0.10    1.00
  -2   4  -1    0.40    0.90
  -2   4  -1   -0.90    0.80
   2   4   1    0.20    0.60
   3  -4   1   17.70    2.20
  -3  -4  -1   10.20    1.70
   3  -4   1   15.20    1.70
   3  -4   1   14.70    2.10
  -3  -4  -1   15.80    1.90
  -3  -4  -1   13.30    1.60
  -3  -4  -1   14.50    1.30
   3   4   1   15.20    1.80
  -3   4  -1   14.30    1.70
   3   4   1   10.50    1.60
   3   4   1   12.90    1.20
   3   4   1   15.40    2.00
  -3   4  -1   13.50    1.60
  -3   4  -1   12.90    1.90
   4  -4   1   16.10    1.90
   4  -4   1   22.50    2.60
  -4  -4  -1   20.80    2.00
  -4  -4  -1   23.30    1.50
   4  -4   1   16.30    2.40
  -4  -4  -1   19.60    2.60
   4   4   1   21.60    1.40
   4   4   1   19.20    2.30
  -4   4  -1   15.90    2.00
   4   4   1   20.20    1.90
  -4   4  -1   14.90    2.20
  -5  -4  -1  264.77    9.60
   5  -4   1  241.28   10.50
   5  -4   1  244.98   10.70
  -5  -4  -1  248.58   10.60
  -5  -4  -1  265.87   10.20
   5  -4   1  240.98   10.40
  -5   4  -1  260.27   10.20
   5   4   1  259.47   10.60
   5   4   1  252.67   10.60
   5   4   1  251.07   10.10
  -5   4  -1  251.97   10.60
  -6  -4  -1    2.70    1.70
   6  -4   1    4.10    2.30
  -6  -4  -1    4.20    0.90
  -6  -4  -1    2.00    1.50
   6  -4   1    4.30    1.40
   6  -4   1    3.80    1.70
   6  -4   1    1.90    0.70
  -6   4  -1    4.80    1.70
   6   4   1    5.10    2.00
   6   4   1    4.70    1.80
  -6   4  -1    1.20    1.30
   6   4   1    6.40    2.00
   6   4   1    2.30    1.40
  -7  -4  -1   18.10    2.60
   7  -4   1   18.80    2.30
  -7  -4  -1   22.10    1.60
   7  -4   1   20.50    1.60
  -7  -4  -1   21.30    2.80
   7   4   1   19.10    2.10
  -7   4  -1   20.40    2.40
   7   4   1   24.30    2.90
   7   4   1   20.50    2.60
  -7   4  -1   23.40    3.10
  -8  -4  -1   11.10    1.20
   8  -4   1    4.80    2.60
  -8  -4  -1    9.20    2.30
  -8  -4  -1   10.20    2.50
   8  -4   1   11.50    1.90
  -8   4  -1    7.40    2.20
   8   4   1   11.30    2.20
   8   4   1    9.40    2.30
   8   4   1   10.70    1.20
   9  -4   1   41.00    4.50
  -9  -4  -1   37.60    4.20
   9  -4   1   45.10    3.30
   9  -4   1   35.10    2.70
   9   4   1   44.30    4.30
  -9   4  -1   33.70    4.20
   9   4   1   38.50    2.10
   9   4   1   39.20    3.80
 -10  -4  -1   77.69    5.60
  10  -4   1   68.29    4.00
  10  -4   1   75.89    4.50
  10  -4   1   81.69    5.90
  10   4   1   64.99    5.50
  10   4   1   62.89    3.00
  10   4   1   71.39    5.10
  10   4   1   66.19    3.00
 -10   4  -1   65.39    5.80
  11  -4   1   19.10    3.90
  11  -4   1   19.40    2.90
 -11  -4  -1   23.70    4.10
  11  -4   1   26.10    3.10
 -11   4  -1   16.60    3.40
  11   4   1   22.40    3.90
  11   4   1   24.30    3.90
  12  -4   1   -3.10    4.00
 -12  -4  -1   -3.20    3.30
  12  -4   1    1.20    2.60
  12   4   1    1.50    3.20
  12   4   1    3.50    3.40
 -12   4  -1   -0.50    3.30
 -13  -4  -1    3.40    4.60
  13  -4   1    4.50    3.20
  13  -4   1    6.80    5.10
 -13   4  -1    7.50    4.50
  13   4   1    3.20    3.70
  14  -4   1   11.80    5.50
  14  -4   1   13.10    4.60
 -14   4  -1   12.00    5.30
  14   4   1   13.00    4.60
  14   4   1    6.30    4.80
  15  -4   1   -6.90    6.00
 -15  -4  -1   -2.20    7.00
 -15   4  -1   -0.90    5.80
  15   4   1    9.20    5.10
  16  -4   1    9.60    8.00
 -16  -4  -1   15.80    7.40
  16   4   1   13.00    6.80
 -16   4  -1    8.30    6.80
  16   4   1    2.00    6.10
  16  -5  -1   -1.60    8.40
 -16  -5   1    9.60    7.60
  16   5  -1   -5.20    6.00
  16   5  -1    3.00    6.30
 -16   5   1    3.20    7.00
  15  -5  -1   19.00    6.10
 -15  -5   1   26.90    7.20
  15  -5  -1   25.80    7.70
  15   5  -1   17.40    5.70
  15   5  -1   18.90    6.00
 -15   5   1   16.20    6.00
  14  -5  -1    6.40    5.30
 -14  -5   1    2.40    5.30
  14  -5  -1    0.20    4.60
  14   5  -1   -5.10    4.30
  14   5  -1   -2.80    4.40
 -14   5   1   -3.20    4.70
  13  -5  -1   12.30    3.30
  13  -5  -1    2.10    5.40
 -13  -5   1   14.60    4.80
  13  -5  -1   12.20    3.70
  13   5  -1   17.50    4.60
 -13   5   1   19.90    5.10
  13   5  -1    8.60    4.20
 -12  -5   1   -0.80    3.80
  12  -5  -1    4.30    4.20
  12  -5  -1    2.30    3.00
  12  -5  -1    6.00    2.20
  12   5  -1    4.50    3.30
 -12   5   1    1.70    3.40
  12   5  -1    5.20    3.30
  11  -5  -1   69.39    6.60
  11  -5  -1   74.59    4.90
 -11  -5   1   77.49    6.30
  11  -5  -1   58.19    3.70
  11  -5  -1   53.29    4.00
  11   5  -1   57.89    3.60
 -11   5   1   63.49    6.20
  11   5  -1   55.59    6.10
  11   5  -1   69.79    5.40
 -10  -5   1    0.80    1.40
  10  -5  -1    0.50    1.90
  10  -5  -1   -0.40    3.10
 -10  -5   1    1.80    2.80
  10  -5  -1   -1.90    1.30
 -10   5   1    1.00    2.50
  10   5  -1    0.00    2.50
  10   5  -1    2.20    1.40
  10   5  -1   -1.00    2.40
   9  -5  -1  156.98    6.30
   9  -5  -1  152.98    6.30
  -9  -5   1  155.88    6.50
  -9  -5   1  155.18    8.20
   9  -5  -1  173.98    7.50
   9   5  -1  153.48    8.30
  -9   5   1  158.18    8.30
   9   5  -1  152.98    7.60
   9   5  -1  151.78    6.50
   8  -5  -1   -1.60    0.80
  -8  -5   1    3.70    2.10
  -8  -5   1   -1.80    2.20
  -8  -5   1    1.00    1.20
   8  -5  -1   -0.50    0.90
   8  -5  -1    4.30    1.80
  -8   5   1    1.40    2.00
   8   5  -1    1.10    2.00
   8   5  -1    2.70    2.00
   8   5  -1    0.00    1.20
   7  -5  -1    5.00    1.70
  -7  -5   1    8.20    2.30
  -7  -5   1    6.80    1.80
  -7  -5   1    7.40    1.30
   7   5  -1    4.50    2.00
   7   5  -1    8.30    1.30
  -7   5   1    3.30    1.90
  -6  -5   1    3.40    1.40
  -6  -5   1    0.10    1.70
  -6  -5   1    1.10    1.10
   6  -5  -1    1.30    1.90
   6  -5  -1    2.10    1.40
  -6   5   1    0.00    1.60
   6   5  -1    1.00    1.60
   6   5  -1    0.30    1.40
  -6   5   1    3.30    2.00
   6   5  -1    1.40    1.00
  -6   5   1   -0.20    1.60
   5  -5  -1    2.00    1.70
  -5  -5   1    0.20    1.50
  -5  -5   1    3.40    1.10
   5  -5  -1    2.50    1.40
   5  -5  -1    3.00    2.20
  -5  -5   1    4.30    1.40
  -5   5   1    2.00    1.50
   5   5  -1    4.60    1.30
  -5   5   1    3.60    1.70
   5   5  -1    6.10    1.90
   5   5  -1    1.70    1.40
  -5   5   1    6.10    1.60
   5   5  -1    3.00    0.90
  -4  -5   1   19.20    2.80
   4  -5  -1   26.50    2.30
  -4  -5   1   20.00    1.90
  -4  -5   1   20.30    2.50
  -4  -5   1   22.00    1.80
   4  -5  -1   23.30    2.60
   4  -5  -1   26.30    3.00
   4   5  -1   21.40    1.70
  -4   5   1   21.60    2.30
   4   5  -1   17.00    1.80
   4   5  -1   19.00    2.60
   4   5  -1   16.10    2.10
  -4   5   1   17.60    2.60
  -4   5   1   24.30    2.70
   3  -5  -1  349.96   13.70
  -3  -5   1  342.57   13.30
  -3  -5   1  341.67   13.30
   3  -5  -1  339.97   12.80
   3  -5  -1  346.47   13.60
  -3  -5   1  365.66   14.00
   3  -5  -1  365.36   14.00
   3   5  -1  339.47   13.30
  -3   5   1  359.26   13.60
   3   5  -1  335.07   13.90
  -3   5   1  348.77   13.80
  -3   5   1  351.36   12.80
   3   5  -1  353.56   13.30
   3   5  -1  345.67   13.80
   2  -5  -1    7.20    1.30
  -2  -5   1   12.10    1.50
   2  -5  -1    9.20    1.80
  -2  -5   1    9.60    1.60
  -2  -5   1    7.70    1.50
  -2  -5   1   11.40    1.40
   2  -5  -1    7.00    0.90
  -2   5   1    8.50    1.50
   2   5  -1   10.70    1.40
   2   5  -1    8.90    1.80
   2   5  -1    7.10    1.60
   2   5  -1    8.30    1.20
  -2   5   1    8.00    1.00
  -2   5   1    3.60    1.40
  -2   5   1    8.00    1.50
  -1  -5   1   48.60    2.90
  -1  -5   1   52.49    3.20
   1  -5  -1   51.99    3.00
  -1  -5   1   48.50    2.70
   1  -5  -1   48.10    2.90
   1  -5  -1   45.60    2.50
  -1  -5   1   49.70    2.60
   1  -5  -1   50.29    3.00
   1   5  -1   49.30    3.20
   1   5  -1   51.79    2.80
  -1   5   1   49.50    2.90
   1   5  -1   50.49    2.90
   1   5  -1   50.69    2.70
  -1   5   1   50.39    3.00
  -1   5   1   54.09    3.10
   0  -5  -1   66.09    3.30
   0  -5   1   77.99    3.50
   0  -5   1   70.59    3.50
   0  -5  -1   63.89    3.40
   0  -5   1   76.19    3.80
   0  -5  -1   65.29    3.60
   0  -5   1   73.09    3.40
   0  -5  -1   63.69    3.50
   0   5  -1   73.99    3.80
   0   5   1   64.69    3.40
   0   5   1   66.39    3.60
   0   5  -1   73.19    3.50
   0   5   1   67.39    3.70
   0   5  -1   79.79    3.50
   0   5  -1   72.09    3.40
   0   5   1   65.89    3.30
   1  -5   1   22.70    1.60
   1  -5   1   22.40    2.10
  -1  -5  -1   27.70    1.90
  -1  -5  -1   21.30    2.00
  -1  -5  -1   30.00    2.30
   1  -5   1   22.90    2.10
  -1  -5  -1   24.30    2.00
   1  -5   1   21.50    2.10
   1   5   1   25.40    2.10
   1   5   1   27.40    1.80
   1   5   1   24.50    2.00
  -1   5  -1   21.40    2.00
  -1   5  -1   22.00    2.40
  -1   5  -1   22.80    2.10
  -1   5  -1   20.60    1.60
   1   5   1   27.00    2.30
  -2  -5  -1   11.80    1.70
  -2  -5  -1    7.00    1.50
  -2  -5  -1   10.90    1.60
   2  -5   1   15.90    2.10
   2  -5   1   11.50    1.00
   2  -5   1   14.90    2.00
  -2  -5  -1   13.00    1.40
   2   5   1    9.00    1.60
   2   5   1   13.40    1.70
   2   5   1   11.50    1.30
  -2   5  -1    9.90    1.00
  -2   5  -1   10.60    1.50
  -2   5  -1   15.80    2.00
  -2   5  -1   15.00    2.00
   2   5   1   11.30    1.80
  -3  -5  -1  360.66   14.00
   3  -5   1  342.37   13.90
  -3  -5  -1  368.06   13.50
   3  -5   1  361.26   14.10
   3  -5   1  346.57   13.60
  -3  -5  -1  353.46   13.30
   3   5   1  357.86   13.90
  -3   5  -1  317.27   14.40
  -3   5  -1  340.17   13.60
   3   5   1  354.86   13.30
   3   5   1  352.56   13.60
   4  -5   1   97.59    4.60
   4  -5   1   92.59    5.00
   4  -5   1   93.19    5.20
  -4  -5  -1   95.39    4.10
  -4  -5  -1   95.69    4.50
  -4  -5  -1   89.69    4.90
   4   5   1   93.39    5.00
   4   5   1   97.59    5.00
   4   5   1   97.29    4.10
   4   5   1   93.89    4.50
  -4   5  -1   95.39    5.10
  -4   5  -1   92.39    5.00
  -4   5  -1   96.59    4.70
   5  -5   1   30.30    3.30
   5  -5   1   26.10    2.40
  -5  -5  -1   26.80    2.50
  -5  -5  -1   25.70    1.80
  -5  -5  -1   24.50    2.80
   5  -5   1   19.40    2.50
  -5   5  -1   25.40    2.80
   5   5   1   26.20    1.80
   5   5   1   29.90    3.10
   5   5   1   25.70    2.40
  -5   5  -1   27.90    2.70
   5   5   1   24.90    2.90
  -6  -5  -1   35.10    3.40
  -6  -5  -1   36.30    3.00
   6  -5   1   30.60    3.50
  -6  -5  -1   34.20    2.10
   6  -5   1   34.10    2.70
   6   5   1   35.40    2.10
   6   5   1   34.00    3.30
  -6   5  -1   31.10    3.30
  -6   5  -1   34.40    3.10
  -7  -5  -1   23.30    2.90
   7  -5   1   21.30    2.40
  -7  -5  -1   27.40    3.40
  -7  -5  -1   23.20    1.80
   7   5   1   20.50    2.80
   7   5   1   24.40    1.80
  -7   5  -1   20.90    2.60
  -7   5  -1   23.80    3.20
   7   5   1   23.90    2.80
   8  -5   1   22.30    2.80
  -8  -5  -1   17.70    1.80
  -8  -5  -1   13.80    2.70
  -8  -5  -1   19.10    3.40
   8   5   1   20.10    1.70
   8   5   1   21.40    2.90
   8   5   1   24.20    3.10
  -8   5  -1   20.40    3.20
   9  -5   1    0.70    1.10
   9  -5   1   -1.00    1.00
   9  -5   1    0.80    2.60
  -9  -5  -1    0.50    1.10
  -9  -5  -1    1.10    2.60
   9  -5   1    1.30    1.80
   9   5   1    0.40    2.10
  -9   5  -1    2.20    2.40
   9   5   1    0.30    2.20
  10  -5   1   36.90    3.60
  10  -5   1   36.20    5.20
 -10  -5  -1   39.30    4.80
  10   5   1   39.50    4.40
  10   5   1   32.80    2.10
 -10   5  -1   32.70    4.70
  10   5   1   32.70    4.80
  11  -5   1    2.40    2.60
  11  -5   1   -0.30    3.50
 -11  -5  -1    1.30    3.20
  11  -5   1    2.00    1.80
  11   5   1   -0.60    3.00
 -11   5  -1   -0.70    3.00
  11   5   1    3.30    2.90
  12  -5   1    7.00    4.50
  12  -5   1    0.20    2.60
 -12  -5  -1    1.80    4.00
  12   5   1    0.60    3.50
  12   5   1    2.70    3.40
 -12   5  -1    3.30    3.40
  13  -5   1   16.90    4.10
 -13  -5  -1   22.60    5.70
  13  -5   1   10.90    5.20
  13   5   1   18.10    4.80
  13   5   1   10.40    4.50
 -14  -5  -1    4.50    5.60
  14  -5   1   -1.10    4.30
  14  -5   1    4.60    6.00
  14   5   1   -4.30    4.20
  14   5   1    1.70    4.60
 -14   5  -1    1.00    5.30
 -15  -5  -1   16.50    7.10
  15  -5   1    7.60    7.00
  15   5   1    8.00    5.50
 -15   5  -1    5.00    6.40
  16  -5   1  -18.20    8.00
 -16  -5  -1   -6.90    8.90
  16   5   1    1.00    6.20
  16   5   1   -2.00    5.90
 -16   5  -1    7.50    7.90
 -15  -6   1    3.70    7.00
  15  -6  -1    3.90    6.00
  15  -6  -1   -6.10    6.50
 -15   6   1   -4.50    6.10
  15   6  -1   -2.80    6.10
  15   6  -1    8.90    5.40
  14  -6  -1   -0.40    6.30
 -14  -6   1   -0.90    5.90
  14  -6  -1   -1.20    5.50
 -14   6   1    2.40    5.10
  14   6  -1   -0.80    4.60
  14   6  -1    3.50    5.40
  13  -6  -1   12.80    5.70
  13  -6  -1   -4.60    3.80
 -13  -6   1   11.90    5.20
  13   6  -1    4.20    4.90
  13   6  -1    0.00    4.00
  12  -6  -1   42.30    4.90
 -12  -6   1   44.80    6.30
  12  -6  -1   41.10    6.30
 -12   6   1   27.50    5.10
  12   6  -1   37.20    4.80
  12   6  -1   39.30    5.90
 -11  -6   1   -0.80    3.30
  11  -6  -1    1.70    3.90
  11  -6  -1    3.20    2.80
  11   6  -1    4.70    3.20
 -11   6   1    7.40    3.60
  11   6  -1   -1.00    2.80
 -10  -6   1   63.09    5.60
  10  -6  -1   70.99    4.90
 -10  -6   1   65.09    3.70
  10   6  -1   64.49    5.00
  10   6  -1   54.89    3.70
 -10   6   1   58.99    5.80
  10   6  -1   66.29    6.00
  -9  -6   1    7.60    2.70
   9  -6  -1    8.20    2.30
  -9  -6   1    8.50    1.60
  -9  -6   1   11.70    3.30
   9   6  -1    8.60    2.90
  -9   6   1    4.60    2.60
   9   6  -1    8.30    2.50
   9   6  -1    6.60    1.60
  -8  -6   1   54.29    4.20
   8  -6  -1   65.79    4.30
  -8  -6   1   59.79    3.30
  -8  -6   1   56.29    5.00
  -8   6   1   57.89    5.00
   8   6  -1   60.69    4.20
   8   6  -1   58.49    5.10
   8   6  -1   56.69    3.30
  -7  -6   1   11.90    2.20
  -7  -6   1   10.30    2.60
   7  -6  -1   10.10    2.10
  -7  -6   1   10.30    1.60
   7   6  -1   14.60    2.40
  -7   6   1   12.30    2.60
   7   6  -1    9.90    2.50
   7   6  -1    8.20    1.60
  -6  -6   1   19.10    2.10
   6  -6  -1   18.70    3.40
  -6  -6   1   15.50    2.60
   6  -6  -1   20.40    2.60
  -6  -6   1   19.40    2.30
   6   6  -1   24.10    2.90
  -6   6   1   19.10    2.70
  -6   6   1   13.50    2.70
   6   6  -1   16.70    1.80
   6   6  -1   16.80    2.30
   5  -6  -1   14.30    2.30
  -5  -6   1   13.90    2.00
   5  -6  -1   12.00    2.00
  -5  -6   1   16.80    2.60
  -5  -6   1   16.20    1.70
   5  -6  -1   14.90    3.10
  -5   6   1   15.90    2.30
   5   6  -1   13.80    1.90
  -5   6   1   13.30    2.60
  -5   6   1   15.80    2.90
   5   6  -1   15.60    1.70
   5   6  -1   12.50    2.20
  -4  -6   1   11.50    1.60
  -4  -6   1    9.00    2.00
   4  -6  -1    8.20    2.50
   4  -6  -1    3.50    1.70
   4  -6  -1    7.10    1.60
  -4  -6   1    9.90    2.40
  -4  -6   1    8.50    1.40
   4   6  -1    9.80    1.40
   4   6  -1    9.80    1.60
  -4   6   1    7.90    1.80
  -4   6   1   11.80    2.50
  -4   6   1    8.80    1.80
   4   6  -1    9.40    1.80
   4   6  -1   11.90    2.20
  -3  -6   1   19.90    2.50
   3  -6  -1   23.20    1.40
   3  -6  -1   26.60    2.40
   3  -6  -1   19.60    2.60
  -3  -6   1   22.60    2.00
  -3  -6   1   23.70    2.00
  -3  -6   1   21.70    2.90
   3  -6  -1   22.70    2.90
  -3   6   1   24.90    1.40
   3   6  -1   24.30    2.70
   3   6  -1   22.70    2.80
  -3   6   1   23.50    2.80
  -3   6   1   25.60    2.50
   3   6  -1   23.20    2.10
   3   6  -1   24.90    2.00
  -3   6   1   21.90    2.80
   2  -6  -1    1.60    1.40
   2  -6  -1    2.00    1.20
  -2  -6   1    4.40    1.60
  -2  -6   1    3.20    1.30
   2  -6  -1    2.30    1.50
   2  -6  -1    2.30    0.90
  -2   6   1    2.00    1.30
  -2   6   1    2.50    1.00
   2   6  -1    2.80    1.40
   2   6  -1    0.60    1.10
   2   6  -1    3.10    1.60
   2   6  -1    2.60    1.20
  -1  -6   1   29.20    2.70
   1  -6  -1   32.60    2.60
   1  -6  -1   27.60    2.00
  -1  -6   1   28.60    2.40
  -1  -6   1   31.50    2.20
   1  -6  -1   28.70    2.70
   1  -6  -1   29.80    2.40
  -1   6   1   30.20    2.10
  -1   6   1   26.50    2.50
   1   6  -1   27.20    2.20
   1   6  -1   30.00    2.40
   1   6  -1   30.00    2.30
  -1   6   1   25.10    2.40
   1   6  -1   31.60    2.90
   0  -6   1  253.77   10.40
   0  -6   1  266.97   10.90
   0  -6   1  255.17   10.50
   0  -6  -1  260.27   10.60
   0  -6   1  268.27   10.60
   0  -6  -1  278.27   10.70
   0  -6  -1  276.77   10.90
   0  -6  -1  264.97   10.50
   0   6   1  276.37   10.60
   0   6  -1  253.07   10.60
   0   6   1  265.77   10.40
   0   6  -1  259.57   11.00
   0   6  -1  263.67   10.60
   0   6  -1  262.87   10.40
   0   6   1  268.67   10.80
  -1  -6  -1    0.40    1.30
   1  -6   1    4.50    1.30
  -1  -6  -1    2.30    1.30
  -1  -6  -1    3.30    1.40
   1  -6   1    1.10    1.20
   1  -6   1    0.70    0.90
   1  -6   1    1.10    1.20
   1   6   1    0.00    1.10
  -1   6  -1    3.50    1.40
  -1   6  -1    3.50    1.20
  -1   6  -1    1.30    1.40
   1   6   1    1.00    1.20
   1   6   1    2.50    2.00
  -1   6  -1    1.60    1.00
   1   6   1    2.20    1.40
   2  -6   1   63.09    3.60
   2  -6   1   58.89    3.70
   2  -6   1   56.89    3.30
  -2  -6  -1   53.69    3.10
  -2  -6  -1   59.29    3.20
   2  -6   1   55.39    2.60
  -2  -6  -1   55.39    3.80
   2   6   1   53.59    3.40
   2   6   1   56.99    3.10
  -2   6  -1   55.69    2.60
   2   6   1   58.29    3.70
   2   6   1   52.79    3.20
  -2   6  -1   57.69    3.30
  -2   6  -1   60.29    3.80
  -2   6  -1   51.99    3.70
   3  -6   1    4.70    1.70
  -3  -6  -1    8.70    1.80
  -3  -6  -1    9.40    1.40
  -3  -6  -1    9.50    2.10
   3  -6   1    9.60    1.60
  -3  -6  -1   10.50    1.70
   3  -6   1    9.00    2.00
  -3   6  -1    7.40    0.80
  -3   6  -1   11.50    2.20
   3   6   1    8.60    1.60
  -3   6  -1    7.30    1.70
   3   6   1   10.00    2.00
  -3   6  -1    5.10    1.70
   3   6   1    8.10    1.90
   3   6   1    8.80    1.40
  -4  -6  -1    4.90    1.10
   4  -6   1    3.30    1.80
   4  -6   1    3.00    2.20
  -4  -6  -1    2.30    1.60
  -4  -6  -1    2.20    1.70
  -4  -6  -1    3.70    1.60
   4  -6   1    1.40    1.40
   4   6   1    4.10    2.10
   4   6   1    4.00    1.50
   4   6   1    3.10    1.70
  -4   6  -1    3.30    1.60
  -4   6  -1    3.20    1.70
   4   6   1    4.10    1.10
  -4   6  -1    4.80    2.00
   5  -6   1   38.60    3.00
   5  -6   1   34.00    3.60
   5  -6   1   36.40    3.80
  -5  -6  -1   38.30    2.30
  -5  -6  -1   35.60    3.40
  -5  -6  -1   35.40    3.00
  -5   6  -1   39.30    3.50
  -5   6  -1   37.20    3.50
   5   6   1   36.50    3.50
   5   6   1   36.80    2.40
   5   6   1   34.30    2.80
  -5   6  -1   45.50    3.80
  -6  -6  -1   40.80    3.90
   6  -6   1   52.09    3.50
  -6  -6  -1   47.40    3.40
  -6  -6  -1   49.50    2.70
   6   6   1   45.30    4.10
  -6   6  -1   47.20    4.00
   6   6   1   48.40    3.50
   6   6   1   45.40    2.70
  -7  -6  -1    2.30    2.30
  -7  -6  -1    2.30    1.90
  -7  -6  -1    1.10    1.20
   7  -6   1    0.00    1.60
   7   6   1    2.30    1.90
   7   6   1    2.20    2.10
   7   6   1    1.30    1.20
  -7   6  -1   -2.00    1.90
  -8  -6  -1    7.70    2.80
   8  -6   1    8.90    2.20
  -8  -6  -1    7.80    1.40
  -8  -6  -1    6.20    2.40
  -8   6  -1    7.50    2.50
   8   6   1    4.80    2.50
   8   6   1    5.80    1.30
   8   6   1   12.50    2.50
  -9  -6  -1   10.60    3.10
  -9  -6  -1    7.20    1.50
   9   6   1   10.00    2.70
  -9   6  -1    3.30    2.70
   9   6   1    5.70    2.70
   9   6   1    7.10    1.30
  10  -6   1   18.90    3.00
 -10  -6  -1   16.50    4.00
  10  -6   1   18.80    4.10
  10   6   1   12.70    3.10
 -10   6  -1    9.90    3.20
  10   6   1   18.70    3.20
  11  -6   1   47.70    6.40
 -11  -6  -1   51.39    6.20
  11  -6   1   54.29    4.80
  11   6   1   59.19    5.40
 -11   6  -1   45.60    6.30
  11   6   1   51.09    6.00
  12  -6   1    9.50    5.50
  12  -6   1    7.30    3.30
 -12  -6  -1   11.70    4.80
 -12   6  -1    3.70    3.80
  12   6   1    1.80    3.70
  12   6   1    5.40    3.60
  13  -6   1   13.30    5.70
  13  -6   1    2.20    4.40
 -13  -6  -1  -10.50    4.70
 -13   6  -1    1.80    4.70
  13   6   1   -0.40    4.00
  13   6   1    0.50    3.90
 -14  -6  -1    8.00    6.10
  14  -6   1   -4.50    4.50
  14  -6   1    3.10    6.30
  14   6   1   -2.70    4.70
  14   6   1   -1.60    4.60
 -14   6  -1    4.50    5.10
  15  -6   1   13.70    8.30
 -15  -6  -1   16.40    7.90
  15  -6   1    5.60    5.20
  15   6   1    4.40    7.30
 -15   6  -1   22.10    6.90
  15   6   1   11.50    6.00
 -15  -7   1    1.00    7.90
  15  -7  -1    7.00    6.00
  15  -7  -1    3.30    7.60
  15   7  -1    2.80    5.40
  15   7  -1    8.10    6.20
 -15   7   1    6.40    6.90
 -14  -7   1    9.90    6.50
  14  -7  -1    9.30    5.90
  14  -7  -1    7.80    6.60
  14   7  -1   -4.00    4.60
 -14   7   1   -0.20    5.70
  14   7  -1   10.30    5.80
  13  -7  -1    4.60    4.80
  13  -7  -1    6.30    6.10
 -13  -7   1   10.80    5.20
  13   7  -1   11.60    5.20
  13   7  -1    9.10    4.30
 -13   7   1    4.20    5.10
 -12  -7   1   -0.50    5.60
  12  -7  -1   -2.90    3.20
  12  -7  -1   -1.10    5.00
  12   7  -1    4.90    4.00
  12   7  -1   -2.70    3.30
 -12   7   1    4.30    4.20
 -11  -7   1    1.80    3.90
  11  -7  -1    4.10    3.30
 -11  -7   1    3.90    1.90
  11  -7  -1    4.00    4.60
 -11   7   1    8.40    3.70
  11   7  -1    5.20    3.90
  11   7  -1    7.50    3.10
 -10  -7   1    3.30    3.40
 -10  -7   1    1.10    1.80
  10  -7  -1    0.30    2.60
 -10   7   1    1.20    3.10
  10   7  -1   -4.40    2.90
  10   7  -1    2.20    1.80
  10   7  -1   -3.00    2.60
  -9  -7   1    2.10    2.80
  -9  -7   1    1.60    1.80
  -9  -7   1    5.40    2.70
   9   7  -1    1.50    3.00
  -9   7   1    2.60    2.70
   9   7  -1    3.10    2.50
   9   7  -1    4.40    1.80
   8  -7  -1    7.70    2.30
  -8  -7   1    7.00    3.10
  -8  -7   1    4.60    2.30
   8   7  -1    2.20    1.60
   8   7  -1    5.20    2.30
   8   7  -1    6.60    3.00
  -8   7   1    9.10    2.70
  -7  -7   1   17.10    2.40
   7  -7  -1   19.80    2.70
  -7  -7   1   17.80    3.20
  -7   7   1   15.60    3.00
   7   7  -1   13.70    3.00
   7   7  -1   15.60    2.00
   7   7  -1   21.60    2.70
  -6  -7   1    1.30    1.40
   6  -7  -1    0.60    1.70
  -6  -7   1   -0.60    2.10
  -6  -7   1    0.20    1.80
  -6   7   1   -1.20    2.00
   6   7  -1    0.30    2.00
   6   7  -1   -0.10    1.40
  -6   7   1    0.60    2.30
   6   7  -1    1.60    2.80
  -5  -7   1   27.70    2.50
   5  -7  -1   33.60    3.10
  -5  -7   1   29.10    3.30
  -5  -7   1   26.20    2.60
  -5   7   1   36.60    3.70
   5   7  -1   26.70    3.50
   5   7  -1   25.60    2.50
  -5   7   1   25.40    3.40
   5   7  -1   28.20    2.60
  -4  -7   1  106.39    4.80
  -4  -7   1   99.39    4.70
   4  -7  -1   99.79    5.10
  -4  -7   1   97.29    5.40
   4  -7  -1   95.59    5.50
   4   7  -1   99.09    4.70
   4   7  -1   98.29    4.80
  -4   7   1   99.99    5.60
   4   7  -1   94.29    5.60
  -4   7   1   96.79    5.70
   3  -7  -1    2.60    1.60
   3  -7  -1    0.10    1.40
  -3  -7   1    2.60    1.80
  -3  -7   1    1.10    1.30
   3  -7  -1    1.40    0.80
  -3  -7   1   -0.40    1.50
   3  -7  -1    3.10    1.80
  -3  -7   1   -1.80    1.10
  -3   7   1    0.50    1.80
   3   7  -1    0.70    1.30
  -3   7   1    2.60    0.90
   3   7  -1    4.60    1.90
   3   7  -1    0.10    1.60
   3   7  -1    1.60    1.20
  -3   7   1    1.80    1.50
   2  -7  -1  426.56   18.00
   2  -7  -1  462.75   17.90
   2  -7  -1  450.55   17.40
   2  -7  -1  459.15   18.20
  -2  -7   1  469.35   17.60
  -2  -7   1  464.25   17.70
  -2  -7   1  474.45   18.40
  -2  -7   1  467.85   18.10
   2   7  -1  468.35   18.40
   2   7  -1  476.75   18.10
  -2   7   1  463.95   18.30
  -2   7   1  448.96   17.90
   2   7  -1  466.65   17.80
  -2   7   1  455.25   18.40
  -2   7   1  472.65   17.30
   2   7  -1  466.85   17.80
  -1  -7   1    3.00    1.70
   1  -7  -1    2.90    1.20
   1  -7  -1    5.40    1.50
  -1  -7   1    1.90    1.20
   1  -7  -1    0.90    1.30
  -1  -7   1    0.70    1.30
   1  -7  -1    0.00    1.50
  -1   7   1    3.70    1.60
  -1   7   1    4.90    1.20
  -1   7   1    1.20    1.60
   1   7  -1    0.40    1.40
   1   7  -1    0.10    1.50
   1   7  -1    1.10    1.50
   1   7  -1    0.50    1.20
   0  -7   1   54.59    3.20
   0  -7   1   55.99    3.40
   0  -7   1   52.99    3.70
   0  -7   1   48.70    3.00
   0  -7  -1   51.49    3.40
   0  -7  -1   49.40    3.60
   0  -7  -1   46.30    3.20
   0  -7  -1   48.40    3.10
   0   7   1   50.49    3.10
   0   7  -1   53.59    3.70
   0   7  -1   51.99    3.30
   0   7  -1   53.09    3.10
   0   7   1   48.70    3.50
   0   7  -1   52.39    3.40
   0   7   1   48.60    3.40
   1  -7   1    2.10    1.30
  -1  -7  -1    2.30    1.30
   1  -7   1    3.00    1.60
  -1  -7  -1    3.50    1.60
  -1  -7  -1    4.60    1.70
   1  -7   1    3.70    1.10
   1  -7   1    2.40    1.60
  -1   7  -1    2.70    1.20
   1   7   1    4.00    1.60
  -1   7  -1    2.80    1.50
   1   7   1    0.80    1.40
   1   7   1    4.20    1.60
   1   7   1    2.40    1.60
  -1   7  -1    2.40    1.60
  -2  -7  -1  115.49    5.60
   2  -7   1  113.29    5.60
   2  -7   1  110.09    5.40
   2  -7   1  110.69    4.70
  -2  -7  -1  114.09    6.00
  -2  -7  -1  114.49    5.30
  -2  -7  -1  115.79    5.20
   2  -7   1  103.59    5.70
   2   7   1  113.69    5.30
  -2   7  -1  117.99    5.80
   2   7   1  112.49    5.50
  -2   7  -1  105.79    5.50
   2   7   1  117.99    5.80
  -2   7  -1  105.19    5.80
  -2   7  -1  111.49    4.70
   2   7   1  116.89    5.50
   3  -7   1    4.10    0.80
  -3  -7  -1    5.80    1.90
  -3  -7  -1    2.60    1.60
   3  -7   1    5.30    1.60
  -3  -7  -1    3.70    1.70
  -3  -7  -1    3.30    1.40
   3  -7   1    4.00    1.60
   3  -7   1    2.80    1.90
   3   7   1    2.20    1.40
  -3   7  -1    4.60    0.80
   3   7   1    4.80    1.80
  -3   7  -1    5.00    1.90
   3   7   1    6.30    2.10
  -3   7  -1    3.70    1.60
   3   7   1    2.90    1.60
  -4  -7  -1   44.60    3.60
   4  -7   1   49.80    4.20
  -4  -7  -1   51.09    3.30
  -4  -7  -1   51.79    3.30
   4  -7   1   46.90    3.50
   4  -7   1   45.50    4.40
   4   7   1   46.30    3.30
  -4   7  -1   47.90    3.90
   4   7   1   46.60    3.90
  -4   7  -1   50.69    4.00
   4   7   1   48.50    3.10
  -5  -7  -1   24.00    2.80
   5  -7   1   36.50    3.10
  -5  -7  -1   23.30    3.40
   5   7   1   21.00    2.40
   5   7   1   30.00    3.50
  -5   7  -1   28.40    3.60
  -5   7  -1   31.40    3.60
  -6  -7  -1  147.59    6.40
  -6  -7  -1  146.79    7.70
  -6  -7  -1  150.68    6.90
   6  -7   1  148.29    7.10
   6   7   1  147.49    6.40
  -6   7  -1  144.89    7.70
   6   7   1  145.69    7.70
   6   7   1  151.78    7.00
   7  -7   1    3.90    2.10
  -7  -7  -1    6.40    2.30
  -7  -7  -1    6.20    2.90
  -7  -7  -1    4.80    1.50
   7   7   1    5.50    2.20
   7   7   1    2.80    2.30
   7   7   1    4.20    1.50
  -7   7  -1    7.00    2.70
  -8  -7  -1    6.30    2.80
  -8  -7  -1    8.80    2.60
  -8  -7  -1   11.60    1.80
   8  -7   1    7.80    2.40
  -8   7  -1    9.90    2.90
   8   7   1   10.00    1.70
   8   7   1   12.80    2.60
   8   7   1   12.00    3.20
   9  -7   1   17.20    2.90
  -9  -7  -1    8.90    3.40
  -9  -7  -1   11.90    1.80
   9   7   1   12.80    1.90
  -9   7  -1   10.20    3.40
   9   7   1    9.20    3.00
   9   7   1   22.20    3.20
 -10  -7  -1    2.70    3.60
 -10  -7  -1    1.40    1.60
  10  -7   1    0.90    3.60
  10  -7   1    0.80    2.60
  10   7   1    0.40    3.00
 -10   7  -1   -1.50    2.80
  10   7   1    0.00    2.80
  10   7   1    0.80    1.60
  11  -7   1    3.10    3.00
  11  -7   1   -0.70    4.20
 -11  -7  -1    1.00    4.10
  11   7   1   -1.20    3.10
  11   7   1    0.30    3.30
 -11   7  -1    1.80    3.40
  12  -7   1    3.40    3.40
  12  -7   1   10.80    5.50
 -12  -7  -1    7.60    5.10
 -12   7  -1   11.20    4.60
  12   7   1    1.70    3.70
  12   7   1    8.00    4.90
  13  -7   1   -2.50    5.20
 -13  -7  -1    7.70    5.70
  13  -7   1    1.60    4.20
  13   7   1    2.90    5.30
  13   7   1    5.40    4.20
 -13   7  -1   -0.40    4.70
  14  -7   1   11.60    5.10
 -14  -7  -1   23.90    7.70
  14  -7   1   12.70    7.20
  14   7   1   15.40    5.10
 -14   7  -1   15.20    6.20
  14   7   1   16.80    6.70
  15  -7   1    9.90    8.90
 -15  -7  -1   24.70    8.60
  15   7   1    3.50    6.10
  15   7   1   11.40    6.80
 -15   7  -1   23.20    7.60
  14  -8  -1    0.60    7.50
  14  -8  -1    5.90    7.50
 -14  -8   1    9.20    7.60
 -14   8   1    2.60    6.30
  14   8  -1    2.20    6.40
  14   8  -1    9.20    4.80
  13  -8  -1   31.90    7.40
 -13  -8   1   26.70    7.10
  13   8  -1   24.60    6.00
 -13   8   1   15.50    5.60
  13   8  -1   23.70    4.80
 -12  -8   1    7.20    5.30
  12  -8  -1   -2.40    5.50
  12  -8  -1    1.20    3.60
  12   8  -1    0.30    4.30
  12   8  -1    4.00    3.40
 -11  -8   1    0.90    3.00
  11  -8  -1    0.90    3.60
  11   8  -1   -4.80    2.80
 -11   8   1   -0.10    3.60
  10  -8  -1    9.00    3.40
 -10  -8   1   13.20    4.30
 -10   8   1    7.30    3.60
  10   8  -1   12.80    3.20
  10   8  -1   10.60    3.80
  -9  -8   1    5.80    3.50
  -9  -8   1    1.60    1.80
   9  -8  -1   -3.30    2.70
   9   8  -1   -2.80    2.00
   9   8  -1   -2.20    2.50
  -9   8   1   -0.10    2.80
   9   8  -1   -3.40    2.90
  -8  -8   1    0.00    1.70
  -8  -8   1    0.90    2.40
   8  -8  -1   -0.70    2.30
  -8  -8   1   -0.40    3.00
   8   8  -1    2.60    2.00
  -8   8   1    2.90    2.60
   8   8  -1    1.00    2.80
   8   8  -1    2.90    2.20
  -7  -8   1   15.70    2.70
  -7  -8   1   19.60    2.30
  -7  -8   1   15.00    3.30
   7  -8  -1   19.70    3.20
  -7   8   1   16.80    3.10
   7   8  -1   20.60    2.80
   7   8  -1   18.40    3.50
   7   8  -1   19.50    2.40
  -6  -8   1    5.10    2.10
   6  -8  -1    5.80    2.30
  -6  -8   1    4.30    1.60
  -6  -8   1    1.70    2.30
  -6   8   1    2.60    2.80
   6   8  -1    3.70    2.50
   6   8  -1    3.80    1.90
   6   8  -1    2.80    2.30
  -6   8   1    1.40    2.30
  -5  -8   1   83.29    5.50
  -5  -8   1   85.79    4.50
   5  -8  -1   84.29    5.10
  -5  -8   1   88.39    4.60
   5   8  -1   89.69    5.40
   5   8  -1   90.49    4.80
  -5   8   1   84.09    5.80
   5   8  -1   84.19    5.70
  -5   8   1   77.29    5.40
  -4  -8   1   13.90    2.20
  -4  -8   1   13.50    2.60
  -4  -8   1   12.60    1.80
   4   8  -1    9.90    2.00
   4   8  -1   14.60    2.20
   4   8  -1    9.80    2.50
  -4   8   1   18.30    2.80
  -3  -8   1   20.50    2.40
   3  -8  -1   21.70    2.80
   3  -8  -1   24.40    1.80
  -3  -8   1   23.60    2.60
  -3  -8   1   24.40    3.10
  -3   8   1   23.20    3.30
  -3   8   1   20.80    2.70
   3   8  -1   31.60    5.00
   3   8  -1   22.90    2.50
   3   8  -1   19.60    2.70
   3   8  -1   23.10    2.50
  -2  -8   1   36.50    3.30
  -2  -8   1   36.80    2.90
   2  -8  -1   36.10    3.60
   2  -8  -1   38.50    3.10
   2  -8  -1   32.60    3.50
  -2  -8   1   34.70    2.90
   2  -8  -1   37.90    2.50
   2   8  -1   37.30    3.50
  -2   8   1   37.70    3.60
  -2   8   1   37.20    3.60
  -2   8   1   36.80    2.50
   2   8  -1   35.80    3.70
   2   8  -1   34.60    2.90
   2   8  -1   37.30    3.20
  -1  -8   1    6.50    1.60
   1  -8  -1    2.70    1.70
   1  -8  -1    8.30    2.10
  -1  -8   1    3.80    1.70
   1  -8  -1    4.90    1.80
   1  -8  -1    1.30    1.20
  -1  -8   1    6.10    1.70
   1   8  -1    5.60    2.00
  -1   8   1    5.10    1.90
  -1   8   1    5.70    1.50
  -1   8   1    4.70    2.00
   1   8  -1    4.60    1.90
   1   8  -1    7.20    2.00
   1   8  -1    1.50    1.90
   0  -8   1    4.30    1.80
   0  -8  -1    5.10    1.70
   0  -8  -1    6.10    1.90
   0  -8   1    5.70    1.60
   0  -8  -1   10.00    2.20
   0  -8   1    8.80    2.00
   0   8  -1    5.80    2.20
   0   8   1   11.30    1.90
   0   8  -1    7.00    2.00
   0   8   1   11.20    2.20
   0   8   1    5.10    1.80
   0   8  -1    7.60    1.90
   1  -8   1   16.40    1.90
  -1  -8  -1   18.00    2.40
   1  -8   1   20.70    2.50
   1  -8   1   17.80    2.50
  -1  -8  -1   20.20    2.60
  -1  -8  -1   18.20    2.90
  -1  -8  -1   20.00    2.40
  -1   8  -1   19.10    2.20
  -1   8  -1   17.40    2.50
  -1   8  -1   20.00    2.70
   1   8   1   13.00    2.10
   1   8   1   22.20    2.60
   1   8   1   16.90    2.30
   1   8   1   20.50    2.50
  -2  -8  -1    3.40    1.70
   2  -8   1    1.00    1.10
  -2  -8  -1    0.70    1.60
   2  -8   1    3.90    1.90
  -2  -8  -1    2.90    1.30
   2  -8   1    2.30    1.50
   2   8   1   -1.60    1.70
   2   8   1    4.30    2.10
  -2   8  -1    0.20    1.90
  -2   8  -1    1.40    1.00
   2   8   1    1.60    1.80
   2   8   1    4.60    1.70
  -2   8  -1    1.50    1.70
   3  -8   1  181.08    9.40
   3  -8   1  213.68    8.20
  -3  -8  -1  229.08    9.00
   3  -8   1  208.38    9.20
  -3  -8  -1  216.98    9.50
  -3  -8  -1  214.58    9.00
  -3   8  -1  205.48    9.60
   3   8   1  213.18    9.70
  -3   8  -1  215.68    8.10
  -3   8  -1  215.78    9.80
   3   8   1  205.88    9.50
   3   8   1  211.78    8.90
  -4  -8  -1   32.60    3.50
  -4  -8  -1   29.60    3.00
   4  -8   1   33.10    3.30
  -4  -8  -1   34.40    2.70
  -4   8  -1   33.50    3.90
   4   8   1   28.60    2.90
   4   8   1   35.90    3.20
   4   8   1   25.10    3.20
  -4   8  -1   31.80    3.70
  -5  -8  -1  188.68    8.00
  -5  -8  -1  176.98    8.30
   5  -8   1  195.08    8.70
  -5  -8  -1  183.88    9.10
  -5   8  -1  186.38    9.20
   5   8   1  186.68    8.10
  -5   8  -1  209.98    9.50
   5   8   1  190.88    8.50
   5   8   1  186.28    9.20
   6  -8   1   28.70    3.50
  -6  -8  -1   24.90    2.60
  -6  -8  -1   27.40    3.90
  -6  -8  -1   29.20    3.20
  -6   8  -1   32.70    4.40
   6   8   1   25.90    3.50
   6   8   1   25.40    3.20
   6   8   1   21.60    2.90
  -7  -8  -1    5.20    1.70
   7  -8   1    1.20    2.30
  -7  -8  -1    4.20    2.90
  -7  -8  -1    7.40    2.60
   7   8   1    5.90    1.90
  -7   8  -1    2.60    2.70
   7   8   1    6.50    2.40
   7   8   1    4.00    2.60
  -8  -8  -1    2.80    3.20
   8  -8   1    4.50    2.50
   8   8   1    2.30    2.50
   8   8   1    3.80    1.80
   8   8   1   -0.40    3.00
  -8   8  -1    5.20    2.80
  -9  -8  -1    0.00    3.10
   9  -8   1    6.10    2.90
  -9  -8  -1    0.30    1.80
   9   8   1   -3.70    3.00
   9   8   1    2.20    1.90
   9   8   1   -3.30    2.40
  -9   8  -1   -0.90    2.90
 -10  -8  -1   10.90    4.50
  10  -8   1    8.20    3.10
 -10  -8  -1    8.30    1.90
 -10   8  -1    4.80    3.60
  10   8   1   10.50    4.00
  10   8   1   15.40    3.40
  11  -8   1   -1.10    3.40
 -11  -8  -1    0.30    6.20
  11   8   1    5.00    3.30
 -11   8  -1    4.10    3.80
 -12  -8  -1   21.70    6.10
  12  -8   1   21.70    6.50
  12  -8   1   15.10    4.20
 -12   8  -1    6.70    4.40
  12   8   1   16.40    5.00
  12   8   1   14.60    4.10
  13  -8   1   -5.40    5.90
 -13  -8  -1    6.30    6.40
 -13   8  -1    5.80    5.20
  13   8   1    9.80    5.70
  13   8   1   -0.80    4.40
  14  -8   1   16.50    8.70
  14  -8   1    7.00    7.20
 -14  -8  -1   18.90    8.20
 -14   8  -1   10.70    6.90
  14   8   1   20.40    7.20
  14   8   1   10.90    5.00
  14  -9  -1    0.90    8.10
 -14  -9   1   10.20    8.70
  14  -9  -1    8.70    9.00
  14   9  -1    4.50    7.30
 -14   9   1   14.80    7.20
  13  -9  -1   50.29    9.50
 -13  -9   1   47.20    7.60
  13  -9  -1   43.30    6.50
  13   9  -1   35.30    7.20
 -13   9   1   49.40    7.50
  13   9  -1   58.39    6.60
 -12  -9   1    5.90    6.00
  12  -9  -1    5.80    4.80
  12  -9  -1    6.20    6.90
 -12   9   1   -4.00    4.40
  12   9  -1   -0.90    5.10
  12   9  -1   -0.10    3.80
  11  -9  -1   25.00    5.00
 -11  -9   1   46.20    6.80
 -11   9   1   23.10    5.20
  11   9  -1   38.50    4.80
  11   9  -1   22.60    5.30
 -10  -9   1    6.90    2.30
  10  -9  -1   12.60    4.10
  10   9  -1    9.60    5.10
 -10   9   1    4.10    3.80
  10   9  -1   11.60    3.20
  -9  -9   1    3.70    2.20
   9  -9  -1    6.00    3.40
  -9  -9   1    1.90    3.90
   9   9  -1    3.60    2.80
  -9   9   1    2.90    3.30
   9   9  -1    0.70    3.40
  -8  -9   1   -1.70    2.80
  -8  -9   1   -5.80    3.00
  -8  -9   1   -3.50    1.70
   8  -9  -1    3.10    2.90
  -8   9   1   -0.50    2.80
   8   9  -1    2.60    3.10
   8   9  -1    5.70    2.50
   8   9  -1    2.90    2.60
  -7  -9   1    2.70    3.20
  -7  -9   1    2.00    1.90
  -7  -9   1    3.10    2.50
   7  -9  -1    5.50    2.70
   7   9  -1    5.60    2.50
   7   9  -1    1.10    3.10
   7   9  -1   -0.70    2.20
  -7   9   1    2.70    2.60
  -6  -9   1   13.30    3.40
  -6  -9   1   12.90    3.50
  -6  -9   1   12.40    2.20
   6  -9  -1   10.20    2.90
  -6   9   1   15.70    3.80
   6   9  -1   14.20    2.70
  -6   9   1   12.00    3.00
   6   9  -1   12.20    3.20
   5  -9  -1    1.30    2.20
  -5  -9   1    2.10    1.70
  -5  -9   1   -1.50    2.00
  -5  -9   1   -0.70    2.30
   5   9  -1    1.90    2.10
  -5   9   1    3.20    3.00
   5   9  -1    2.90    2.50
  -5   9   1    2.10    2.40
   4  -9  -1   31.80    3.50
  -4  -9   1   27.10    2.90
  -4  -9   1   28.60    3.90
  -4  -9   1   33.20    3.20
  -4   9   1   27.70    4.10
   4   9  -1   28.20    3.80
  -4   9   1   29.00    4.10
   4   9  -1   34.80    4.30
  -3  -9   1  220.88   10.10
   3  -9  -1  228.28    8.80
   3  -9  -1  213.38    9.90
  -3  -9   1  225.58    9.50
  -3  -9   1  228.88    9.40
  -3   9   1  210.38   10.50
   3   9  -1  220.18   10.30
   3   9  -1  222.48   10.60
  -3   9   1  223.48   10.40
  -3   9   1  228.08    8.80
   2  -9  -1   50.89    4.10
  -2  -9   1   55.99    3.80
  -2  -9   1   61.39    4.30
   2  -9  -1   54.89    3.30
  -2  -9   1   58.19    3.80
  -2   9   1   57.69    4.60
  -2   9   1   58.79    3.40
   2   9  -1   61.79    4.90
  -2   9   1   59.49    4.70
   2   9  -1   54.69    4.00
   2   9  -1   59.49    4.90
   1  -9  -1  152.48    8.30
   1  -9  -1  176.28    8.10
   1  -9  -1  165.28    8.10
  -1  -9   1  184.68    8.10
  -1  -9   1  185.08    8.00
  -1  -9   1  180.18    7.90
   1   9  -1  184.98    8.80
   1   9  -1  185.68    8.10
  -1   9   1  187.38    7.80
   1   9  -1  179.58    8.20
  -1   9   1  169.58    8.50
  -1   9   1  172.98    8.60
   0  -9  -1    8.80    2.30
   0  -9  -1    3.50    1.80
   0  -9   1    2.50    2.00
   0  -9  -1    2.00    1.80
   0  -9   1    1.70    1.60
   0  -9   1    2.10    1.70
   0   9  -1    5.60    2.10
   0   9   1    4.50    1.90
   0   9  -1    1.50    2.00
   0   9   1    3.60    2.10
   0   9   1    1.20    2.00
   0   9  -1    3.00    1.80
  -1  -9  -1    3.70    2.00
   1  -9   1    0.50    1.40
  -1  -9  -1    2.80    1.90
   1  -9   1    3.90    2.30
  -1  -9  -1    3.10    1.60
   1  -9   1    4.50    1.80
  -1   9  -1    3.10    2.10
  -1   9  -1    4.20    1.70
   1   9   1   -0.30    1.80
  -1   9  -1    1.10    2.00
   1   9   1    2.30    1.90
   1   9   1    2.90    2.10
   2  -9   1   20.10    2.60
   2  -9   1   14.40    2.90
  -2  -9  -1   21.30    2.70
   2  -9   1   19.20    2.00
  -2  -9  -1   20.00    2.50
  -2  -9  -1   19.50    2.90
  -2   9  -1   20.80    2.20
   2   9   1   20.80    3.00
   2   9   1   20.00    2.80
  -2   9  -1   16.40    2.90
  -2   9  -1   14.50    2.80
  -3  -9  -1  287.37   11.90
   3  -9   1  292.87   12.20
   3  -9   1  286.67   11.00
  -3  -9  -1  280.17   11.70
  -3  -9  -1  283.07   12.40
  -3   9  -1  300.07   12.70
   3   9   1  287.77   12.10
  -3   9  -1  278.07   12.70
   3   9   1  279.47   12.70
  -4  -9  -1    0.60    2.40
   4  -9   1    6.90    2.10
  -4  -9  -1    3.50    2.10
  -4  -9  -1    0.50    1.60
  -4   9  -1    1.80    2.60
   4   9   1    2.50    2.20
   4   9   1    1.80    2.40
  -4   9  -1   -0.40    2.30
  -5  -9  -1   72.99    4.20
  -5  -9  -1   71.19    4.70
  -5  -9  -1   65.59    5.30
   5  -9   1   76.19    5.00
  -5   9  -1   64.29    5.50
   5   9   1   63.79    4.40
   5   9   1   73.29    4.70
   5   9   1   71.79    5.70
  -5   9  -1   71.19    5.50
  -6  -9  -1   17.30    3.00
  -6  -9  -1   19.50    3.60
  -6  -9  -1   21.40    2.40
   6  -9   1   19.30    3.20
   6   9   1   16.00    2.60
   6   9   1   20.50    3.70
  -6   9  -1   22.30    3.70
   6   9   1   28.70    3.40
  -7  -9  -1   61.99    3.90
  -7  -9  -1   64.99    5.90
   7  -9   1   64.79    5.00
  -7  -9  -1   52.09    4.70
   7   9   1   58.69    5.80
   7   9   1   53.49    4.20
  -7   9  -1   61.49    5.90
   7   9   1   65.79    4.80
  -8  -9  -1    5.80    2.00
   8  -9   1    5.40    2.80
  -8  -9  -1   11.50    3.80
  -8   9  -1    4.20    3.30
   8   9   1    9.80    2.90
   8   9   1    6.10    3.40
   8   9   1    7.00    2.40
  -9  -9  -1    5.90    2.20
  -9  -9  -1    6.90    4.20
   9  -9   1    6.90    4.00
   9   9   1    9.60    4.00
   9   9   1    8.60    3.30
  -9   9  -1   -0.20    3.40
  10  -9   1    6.10    3.60
  10   9   1    6.60    4.10
 -10   9  -1    3.20    3.90
  10   9   1    8.40    3.50
 -11  -9  -1    6.70    5.20
  11  -9   1    8.60    3.80
  11  -9   1    1.90    5.40
  11   9   1    9.90    3.60
  11   9   1    3.40    4.40
  12  -9   1   -3.00    5.90
  12  -9   1   -4.30    4.50
 -12  -9  -1    0.60    5.80
  12   9   1    7.60    4.20
 -12   9  -1    6.00    4.90
  12   9   1    0.70    4.80
  13  -9   1  -10.20    6.50
  13  -9   1    2.70    7.90
 -13  -9  -1    7.00    6.80
  13   9   1  -10.60    5.80
  13   9   1    5.50    4.70
 -13   9  -1    4.00    5.70
  14  -9   1   14.90    8.70
 -14  -9  -1   23.80    8.90
  14  -9   1   -9.10    6.30
 -14   9  -1   12.40    7.50
  14   9   1    7.10    7.50
  13 -10  -1   -7.90    5.90
 -13 -10   1    4.00    8.30
  13 -10  -1   -3.40    8.60
 -13  10   1   -2.40    6.60
  13  10  -1   -3.10    6.70
 -12 -10   1   -0.50    6.60
  12 -10  -1    4.80    7.00
  12 -10  -1   12.80    7.60
 -12  10   1   -1.20    5.30
  12  10  -1   -2.20    6.00
 -11 -10   1   14.40    6.30
  11 -10  -1    4.60    5.30
  11  10  -1   12.00    5.50
  11  10  -1   16.20    4.00
 -11  10   1    9.90    5.30
 -10 -10   1   11.50    5.20
  10  10  -1    8.30    3.60
  10  10  -1    9.60    4.90
 -10  10   1    0.60    4.10
  -9 -10   1    8.00    5.70
  -9 -10   1    0.20    2.30
   9 -10  -1    0.70    3.70
   9  10  -1    5.90    3.00
  -9  10   1    5.30    4.00
   9  10  -1   -1.50    4.30
   8 -10  -1    0.80    3.30
  -8 -10   1    0.40    2.10
  -8 -10   1   -1.20    3.60
   8  10  -1   -0.50    3.60
   8  10  -1    5.00    2.70
  -8  10   1    0.50    3.40
  -7 -10   1    6.70    2.20
  -7 -10   1    4.90    3.20
   7 -10  -1    0.90    2.90
   7  10  -1    0.30    3.50
  -7  10   1   12.00    3.70
   7  10  -1    8.90    2.80
  -6 -10   1   57.19    4.30
  -6 -10   1   75.39    6.10
   6 -10  -1   69.49    5.50
  -6 -10   1   59.39    4.70
  -6  10   1   47.20    6.30
   6  10  -1   69.29    4.80
   6  10  -1   78.69    6.30
  -6  10   1   63.39    5.90
   5 -10  -1    0.80    2.50
  -5 -10   1    2.60    2.80
  -5 -10   1   -1.70    2.40
  -5 -10   1   -1.50    1.70
  -5  10   1    0.20    2.60
  -5  10   1   -2.80    3.00
   5  10  -1    0.70    2.70
   5  10  -1    2.90    2.30
  -4 -10   1   48.80    3.70
   4 -10  -1   42.50    4.40
  -4 -10   1   50.39    4.70
  -4 -10   1   48.00    6.00
   4  10  -1   36.80    5.10
  -4  10   1   40.20    4.90
  -4  10   1   40.40    2.40
  -4  10   1   42.30    5.00
   4  10  -1   43.40    4.00
  -3 -10   1   56.69    4.80
  -3 -10   1   56.09    4.20
   3 -10  -1   58.19    3.30
  -3 -10   1   58.29    4.30
   3 -10  -1   63.39    4.70
  -3  10   1   54.79    3.50
   3  10  -1   62.09    4.40
  -3  10   1   64.39    5.50
   3  10  -1   58.29    5.30
  -3  10   1   63.09    5.40
  -2 -10   1   75.59    4.90
  -2 -10   1   71.39    4.60
   2 -10  -1   80.09    5.10
   2 -10  -1   72.79    4.20
  -2 -10   1   67.69    4.60
  -2  10   1   77.09    5.60
   2  10  -1   77.69    5.60
  -2  10   1   71.19    5.60
   2  10  -1   72.59    4.90
  -2  10   1   77.89    4.30
  -1 -10   1  195.78    9.20
   1 -10  -1  212.28    9.00
  -1 -10   1  206.48    9.40
  -1 -10   1  204.38    9.30
   1 -10  -1  209.78    9.40
   1  10  -1  193.88    9.30
  -1  10   1  228.48    9.10
   1  10  -1  208.48    9.50
   1  10  -1  206.68   10.20
  -1  10   1  216.38   10.00
  -1  10   1  201.08   10.10
   0 -10  -1   77.29    4.80
   0 -10   1   61.99    4.70
   0 -10  -1   74.89    4.70
   0 -10   1   76.29    4.70
   0 -10   1   70.69    4.40
   0  10   1   71.49    5.10
   0  10  -1   66.99    4.90
   0  10  -1   72.39    4.70
   0  10   1   72.19    4.50
   0  10   1   69.19    5.50
   0  10  -1   73.79    5.60
  -1 -10  -1    3.20    2.20
   1 -10   1    5.80    2.00
   1 -10   1    2.40    1.80
  -1 -10  -1    4.90    2.40
  -1 -10  -1    6.10    2.00
   1  10   1    3.00    2.40
  -1  10  -1    6.40    2.10
  -1  10  -1    2.30    2.50
  -1  10  -1    1.40    2.40
   1  10   1    3.00    2.40
   2 -10   1    1.30    1.50
  -2 -10  -1   -0.10    1.80
  -2 -10  -1    3.70    2.40
  -2 -10  -1    0.50    2.20
   2 -10   1   -1.00    2.00
  -2  10  -1    1.10    2.50
   2  10   1    1.40    2.20
  -2  10  -1    1.80    1.70
   2  10   1    0.00    2.10
  -2  10  -1    3.60    2.40
   3 -10   1    0.50    1.20
  -3 -10  -1   -0.20    2.40
  -3 -10  -1    2.10    1.80
   3 -10   1   -0.20    2.10
  -3 -10  -1   -0.10    2.40
  -3  10  -1    2.70    1.60
  -3  10  -1   -2.70    2.50
   3  10   1   -2.00    2.30
  -3  10  -1   -2.10    2.40
   3  10   1    2.10    2.40
  -4 -10  -1   17.60    2.50
  -4 -10  -1   18.10    3.50
  -4 -10  -1   11.00    2.90
   4 -10   1   14.10    2.80
  -4  10  -1   13.60    3.10
   4  10   1   17.40    3.50
  -4  10  -1   12.60    3.30
   4  10   1   14.60    2.80
   5 -10   1   -2.60    2.30
  -5 -10  -1    3.10    2.80
  -5 -10  -1    4.10    2.80
  -5 -10  -1   -0.60    1.70
   5  10   1   -2.20    2.30
  -5  10  -1    2.40    2.60
  -5  10  -1    0.50    3.00
   5  10   1   -3.20    2.90
  -6 -10  -1   16.30    2.50
  -6 -10  -1   13.10    3.90
   6 -10   1   33.50    4.20
  -6 -10  -1   22.00    4.10
  -6  10  -1   23.20    4.00
   6  10   1   17.90    3.70
   6  10   1   25.90    3.50
  -7 -10  -1   -3.10    3.20
  -7 -10  -1   -2.50    1.80
   7 -10   1    0.50    2.90
   7  10   1    0.30    3.30
   7  10   1    3.60    2.80
  -7  10  -1   -1.50    3.00
  -8 -10  -1    9.80    4.20
   8 -10   1   10.80    3.70
  -8 -10  -1   12.90    2.40
  -8  10  -1    3.00    3.40
   8  10   1   21.50    3.50
   8  10   1   16.50    4.20
  -9 -10  -1    6.30    2.30
   9 -10   1   13.00    4.20
  -9  10  -1    4.80    4.00
   9  10   1    3.20    4.40
   9  10   1   10.80    3.50
 -10 -10  -1   35.30    6.80
  10  10   1   45.00    5.80
  10  10   1   35.50    6.00
 -11 -10  -1   28.10    6.90
  11 -10   1   12.50    7.00
  11 -10   1   16.50    4.90
 -11  10  -1   14.20    5.30
  11  10   1   27.90    4.70
  11  10   1   14.50    5.10
  12 -10   1    6.40    8.30
 -12 -10  -1   13.50    7.30
  12  10   1    6.40    5.70
 -12  10  -1   -4.90    5.20
  12  10   1   12.00    4.80
  13 -10   1    2.70    6.30
 -13 -10  -1    2.80    8.10
  13 -10   1   -2.50    8.10
  13  10   1    4.60    6.80
 -13  10  -1    2.50    6.60
 -12 -11   1   -8.90    7.40
  12 -11  -1    7.40    8.50
  12 -11  -1    6.80    6.50
 -12  11   1   -4.20    5.50
  12  11  -1   -6.30    6.30
  11 -11  -1   -6.30    5.20
 -11 -11   1   19.70    7.30
 -11  11   1   -2.50    4.90
  11  11  -1    3.40    6.00
  10 -11  -1   42.60    6.20
 -10 -11   1   51.19    7.60
  10  11  -1   46.80    5.80
  10  11  -1   50.09    7.30
 -10  11   1   32.50    6.40
  -9 -11   1   10.70    5.40
   9 -11  -1    0.40    4.30
  -9 -11   1   -2.20    2.60
   9  11  -1    1.30    3.20
   9  11  -1    5.20    4.90
  -9  11   1    2.20    4.20
  -8 -11   1   12.10    2.70
  -8 -11   1   15.90    7.30
   8  11  -1   10.70    3.30
  -8  11   1   10.80    4.40
  -7 -11   1   -0.10    2.30
  -7 -11   1    3.40    4.00
   7 -11  -1    0.60    3.40
   7  11  -1    1.80    4.00
  -7  11   1    1.20    3.60
   7  11  -1    1.40    2.90
  -6 -11   1    0.20    2.00
  -6 -11   1    3.10    3.40
   6 -11  -1   -0.70    3.20
   6  11  -1    0.70    3.50
  -6  11   1    2.20    4.10
   6  11  -1    1.90    2.70
  -6  11   1   -3.90    3.00
  -5 -11   1    0.00    2.10
   5 -11  -1    0.80    2.90
  -5 -11   1    1.20    3.20
  -5  11   1   -1.30    3.50
  -5  11   1   -2.10    2.90
   5  11  -1    1.60    2.50
   5  11  -1   -0.90    3.20
  -4 -11   1    2.30    2.60
  -4 -11   1    2.60    2.20
   4 -11  -1    6.50    2.90
  -4 -11   1    7.10    3.10
   4  11  -1    5.80    2.60
  -4  11   1    6.40    3.70
  -4  11   1   -0.10    2.80
   4  11  -1    7.80    3.30
  -4  11   1    6.00    1.40
  -3 -11   1   -0.50    2.60
  -3 -11   1   -2.40    2.40
   3 -11  -1    1.80    1.50
  -3 -11   1   -0.80    1.90
   3 -11  -1    2.10    2.60
   3  11  -1   -1.80    3.00
  -3  11   1    0.50    2.70
  -3  11   1    1.70    3.10
   3  11  -1   -2.10    2.40
  -2 -11   1   11.00    2.40
  -2 -11   1   10.60    2.80
  -2 -11   1   15.00    2.80
   2 -11  -1    9.10    2.70
  -2  11   1    8.30    3.10
   2  11  -1   15.50    3.40
   2  11  -1   16.50    3.10
  -2  11   1   12.20    2.60
  -2  11   1   12.40    3.50
   1 -11  -1   71.39    4.70
  -1 -11   1   76.49    5.20
   1 -11  -1   77.89    5.30
  -1 -11   1   77.09    5.10
   1  11  -1   72.89    5.30
  -1  11   1   74.89    5.90
   1  11  -1   76.89    6.30
  -1  11   1   71.69    4.90
  -1  11   1   69.89    6.00
   0 -11  -1  357.66   14.90
   0 -11  -1  344.47   15.30
   0 -11   1  367.26   14.90
   0 -11   1  379.86   15.20
   0  11  -1  354.36   14.80
   0  11  -1  373.96   15.70
   0  11   1  369.56   15.70
   0  11  -1  359.86   16.10
   0  11   1  369.76   16.00
   0  11   1  358.06   15.60
  -1 -11  -1   12.70    2.60
   1 -11   1    8.00    2.30
   1 -11   1   14.10    2.80
  -1 -11  -1   14.70    2.90
  -1  11  -1   11.50    3.10
   1  11   1   14.90    3.30
  -1  11  -1   13.40    3.30
  -1  11  -1   13.90    2.70
   1  11   1   11.70    3.00
  -2 -11  -1   31.60    4.10
  -2 -11  -1   36.90    3.80
   2 -11   1   31.80    4.10
   2 -11   1   34.30    4.20
  -2  11  -1   36.70    5.10
   2  11   1   39.40    4.30
   2  11   1   39.40    4.50
  -2  11  -1   36.00    4.60
  -2  11  -1   39.10    3.70
  -3 -11  -1    3.90    2.20
   3 -11   1   -0.60    2.40
  -3 -11  -1    3.20    2.70
   3  11   1    1.50    3.00
  -3  11  -1   -2.20    2.80
   3  11   1    1.20    2.60
  -3  11  -1    3.70    3.20
  -3  11  -1    3.50    2.00
   4 -11   1   62.09    5.30
  -4 -11  -1   52.39    4.30
  -4 -11  -1   61.79    5.80
  -4  11  -1   53.09    6.10
   4  11   1   59.09    5.10
   4  11   1   59.09    6.10
  -4  11  -1   41.60    5.90
  -5 -11  -1    4.00    2.20
   5 -11   1    6.40    3.20
  -5 -11  -1    9.60    3.80
  -5  11  -1    4.00    3.70
   5  11   1    6.80    3.50
  -5  11  -1    2.10    3.40
   5  11   1    4.40    2.80
  -6 -11  -1   47.00    5.90
  -6 -11  -1   44.10    4.10
   6 -11   1   51.99    5.40
  -6  11  -1   42.90    6.00
   6  11   1   45.30    6.40
   6  11   1   49.99    5.00
   7 -11   1    3.10    3.40
  -7 -11  -1    4.50    2.30
  -7 -11  -1    2.60    4.10
   7  11   1    4.20    3.10
  -7  11  -1   -2.30    3.30
   7  11   1    4.40    4.00
  -8 -11  -1   36.90    4.10
   8  11   1   41.20    4.70
  -8  11  -1   25.40    4.90
   8  11   1   33.20    8.60
  -9 -11  -1   -6.00    4.80
  -9 -11  -1    2.80    2.60
   9 -11   1   -1.10    4.20
   9  11   1    6.30    3.60
   9  11   1    0.60    4.40
  10 -11   1    6.60    5.40
 -10 -11  -1   13.60    6.20
  10  11   1   12.30    5.70
 -10  11  -1    2.10    4.90
  10  11   1   21.00    4.40
 -11 -11  -1    8.40    5.90
  11 -11   1    8.60    7.80
  11 -11   1   11.80    5.20
 -11  11  -1   -4.30    5.40
  11  11   1    0.50    5.80
  11  11   1   13.30    5.80
  12 -11   1    5.40    6.30
 -12 -11  -1    2.10    7.90
  12 -11   1   -3.20    8.10
 -12  11  -1    2.80    5.90
  12  11   1  -13.50    5.90
 -11 -12   1   11.40    8.00
  11 -12  -1    2.60    6.50
 -11  12   1    4.10    6.10
  11  12  -1    7.40    7.00
  10 -12  -1    0.40    5.20
 -10 -12   1    5.40    6.50
  10  12  -1   10.70    6.60
 -10  12   1    0.00    5.40
  -9 -12   1    0.10    3.00
   9 -12  -1   -4.30    4.80
  -9 -12   1   -1.10    5.50
   9  12  -1    7.80    5.60
  -9  12   1    1.50    5.10
   8 -12  -1   20.60    5.20
  -8 -12   1   20.50    3.50
  -8 -12   1   16.90    5.90
   8  12  -1   28.80    5.80
   8  12  -1   24.50    4.10
   7 -12  -1   13.50    4.70
  -7 -12   1   11.10    3.00
   7  12  -1   11.00    3.30
  -7  12   1    1.70    4.20
   7  12  -1   17.70    5.00
  -6 -12   1   17.20    3.10
  -6 -12   1   12.50    4.30
   6  12  -1   13.00    4.60
  -6  12   1    9.70    4.30
   6  12  -1   19.30    3.70
  -6  12   1   11.50    5.10
   5 -12  -1    9.80    3.90
  -5 -12   1    8.00    4.00
  -5 -12   1    4.70    2.70
   5  12  -1    6.20    3.10
  -5  12   1    6.70    4.30
  -5  12   1    4.20    3.60
   5  12  -1    4.50    4.00
   4 -12  -1   30.40    4.50
  -4 -12   1   25.20    3.40
  -4 -12   1   25.30    4.60
   4  12  -1   26.10    4.50
  -4  12   1   22.30    4.50
  -4  12   1   19.50    5.00
   4  12  -1   32.20    4.10
  -3 -12   1   -0.70    2.40
  -3 -12   1    0.90    3.00
   3 -12  -1   -1.30    1.80
   3 -12  -1   -0.40    3.00
  -3  12   1    0.40    3.20
   3  12  -1    4.90    2.80
   3  12  -1   -4.10    3.10
  -3  12   1    2.40    3.80
  -2 -12   1   -2.90    2.30
  -2 -12   1    4.70    2.80
   2 -12  -1    3.90    2.80
   2 -12  -1    0.40    2.30
   2  12  -1    5.30    3.00
   2  12  -1    1.10    3.00
  -2  12   1    4.20    3.10
  -2  12   1    4.60    3.60
  -1 -12   1   35.10    4.50
  -1 -12   1   19.80    3.30
   1 -12  -1   37.30    3.90
   1 -12  -1   32.80    4.20
   1  12  -1   36.80    4.40
   1  12  -1   28.60    4.40
  -1  12   1   31.70    4.50
  -1  12   1   26.60    4.40
   0 -12   1   -0.50    2.50
   0 -12  -1   -0.10    2.40
   0 -12   1    1.10    2.50
   0 -12  -1    6.50    2.70
   0  12   1    0.70    2.90
   0  12  -1   -0.80    3.00
   0  12   1    2.60    3.20
   0  12  -1   -3.00    3.00
  -1 -12  -1   27.80    3.80
   1 -12   1   25.80    3.80
   1 -12   1   31.50    3.90
  -1 -12  -1   38.50    4.30
  -1  12  -1   25.50    4.30
  -1  12  -1   18.70    4.10
   1  12   1   29.80    4.20
   1  12   1   36.20    4.70
  -2 -12  -1   18.60    3.80
  -2 -12  -1   18.50    3.20
   2 -12   1   25.90    3.80
   2 -12   1   19.60    3.00
   2  12   1   19.10    3.80
  -2  12  -1   17.00    3.80
   2  12   1   22.50    4.00
  -2  12  -1   30.60    4.60
  -3 -12  -1   45.50    5.30
   3 -12   1   31.40    4.50
  -3 -12  -1   27.30    3.70
   3  12   1   36.70    4.80
  -3  12  -1   36.10    4.60
  -3  12  -1   35.00    5.20
   3  12   1   35.90    4.80
  -4 -12  -1    6.30    3.60
   4 -12   1    5.40    3.30
  -4 -12  -1    3.40    2.50
  -4  12  -1    8.40    3.80
  -4  12  -1    2.80    4.00
   4  12   1    2.40    2.90
   4  12   1    5.90    3.70
  -5 -12  -1   17.30    3.10
   5 -12   1    9.20    3.70
  -5 -12  -1   16.70    4.30
   5  12   1   20.40    4.60
  -5  12  -1   16.40    4.40
  -5  12  -1   16.50    4.70
   5  12   1   21.30    3.80
  -6 -12  -1    4.90    4.10
  -6 -12  -1    0.00    2.50
   6  12   1    2.70    3.90
   6  12   1    6.60    3.30
  -6  12  -1    0.20    4.00
   7 -12   1    6.40    4.30
  -7 -12  -1    1.90    2.50
   7  12   1    6.40    3.50
  -7  12  -1   -6.10    4.10
   7  12   1   -5.50    4.50
  -8 -12  -1   17.10    3.20
  -8 -12  -1   12.40    5.60
   8 -12   1    8.10    4.90
   8  12   1   10.00    4.10
  -8  12  -1    5.00    4.90
   8  12   1   12.90    5.30
  -9 -12  -1  -10.70    5.00
   9 -12   1   -1.30    4.80
   9  12   1   -1.50    4.20
   9  12   1    1.30    5.50
  -9  12  -1    2.50    4.90
 -10 -12  -1    8.20    6.50
  10 -12   1    0.80    5.20
 -10  12  -1    0.60    5.50
  10  12   1    8.30    6.40
  11 -12   1   12.90    8.90
 -11 -12  -1   13.30    8.40
  11 -12   1   -5.00    6.40
  11  12   1   -2.50    6.30
 -11  12  -1    5.00    6.50
  10 -13  -1   -1.70    6.60
 -10 -13   1    5.20    7.80
 -10  13   1    2.10    6.60
  10  13  -1    0.70    7.10
   9 -13  -1    2.50    5.10
  -9 -13   1   -1.50    6.80
  -9  13   1   -5.80    5.50
   9  13  -1    5.00    6.20
  -8 -13   1    2.60    3.20
  -8 -13   1    5.60   10.10
   8 -13  -1   -1.80    5.50
  -8  13   1   -8.50    5.30
   8  13  -1   -1.00    5.20
  -7 -13   1    8.10    5.60
   7 -13  -1    2.80    4.40
  -7 -13   1    3.30    3.20
  -7  13   1   -0.40    4.90
   7  13  -1   11.80    5.40
   6 -13  -1   11.90    4.90
  -6 -13   1    0.10    2.90
   6  13  -1    6.10    3.60
  -6  13   1   13.40    6.90
   6  13  -1    5.20    4.80
  -5 -13   1   15.30    3.30
  -5 -13   1   21.50    5.00
   5 -13  -1    2.70    4.10
  -5  13   1    8.70    4.30
   5  13  -1   20.50    5.20
  -5  13   1   20.10    5.70
   5  13  -1   17.70    3.90
   4 -13  -1    8.80    3.90
  -4 -13   1    8.60    3.10
  -4 -13   1   17.90    4.50
  -4  13   1   11.40    4.30
  -4  13   1   15.30    5.00
   4  13  -1    9.40    3.40
   4  13  -1    8.90    5.70
   3 -13  -1   14.40    2.80
  -3 -13   1   14.30    3.30
  -3 -13   1   14.30    4.70
  -3  13   1   14.30    4.30
   3  13  -1    7.10    4.10
   3  13  -1   20.70    4.20
  -3  13   1   15.60    4.80
  -2 -13   1    1.50    3.30
  -2 -13   1    1.60    2.90
   2 -13  -1    6.90    3.50
   2 -13  -1    5.00    2.80
  -2  13   1    8.10    4.20
   2  13  -1    2.80    3.70
   2  13  -1    8.40    3.60
  -2  13   1   -0.30    3.60
  -1 -13   1    6.90    3.20
   1 -13  -1    6.00    3.00
   1 -13  -1    7.40    3.50
  -1 -13   1   13.00    3.60
  -1  13   1   10.60    3.90
   1  13  -1   12.60    3.80
  -1  13   1   15.10    4.30
   1  13  -1   13.30    4.00
   0 -13  -1    3.70    2.80
   0 -13  -1    1.00    3.00
   0 -13   1   -2.10    2.80
   0 -13   1   -0.20    3.00
   0  13  -1    0.80    3.60
   0  13   1    3.50    3.80
   0  13   1   -4.50    3.40
   0  13  -1   -4.40    3.60
  -1 -13  -1    9.90    3.30
   1 -13   1   -0.50    2.60
  -1 -13  -1    2.60    2.90
   1 -13   1    3.90    3.30
  -1  13  -1    5.00    3.90
   1  13   1    4.00    3.70
  -1  13  -1    4.20    3.70
   1  13   1   -1.00    3.50
  -2 -13  -1    6.80    3.10
  -2 -13  -1    2.30    3.50
   2 -13   1    7.50    3.50
   2 -13   1    9.00    2.70
   2  13   1    7.60    3.60
  -2  13  -1   12.10    4.20
   2  13   1    8.80    3.70
  -2  13  -1    1.80    3.70
  -3 -13  -1   66.49    6.40
  -3 -13  -1   60.79    5.30
  -3  13  -1   63.19    7.20
  -3  13  -1   52.59    7.30
   3  13   1   65.29    6.20
   3  13   1   60.29    7.20
  -4 -13  -1    4.80    4.00
   4 -13   1    4.40    3.60
  -4 -13  -1    2.30    2.70
  -4  13  -1    2.00    4.00
   4  13   1    4.80    4.00
  -4  13  -1    6.60    4.70
   4  13   1    5.50    3.80
  -5 -13  -1   -1.90    2.80
   5 -13   1    3.50    3.80
  -5 -13  -1    1.30    4.30
   5  13   1    7.00    6.40
  -5  13  -1    0.40    4.50
   5  13   1    2.50    3.60
  -6 -13  -1   -2.60    2.80
  -6 -13  -1    1.00    6.40
   6 -13   1    6.10    4.80
   6  13   1   -8.80    4.50
  -6  13  -1   -0.50    4.70
   6  13   1    0.20    3.90
   7 -13   1    1.60    4.30
  -7 -13  -1    3.80    3.10
  -7 -13  -1   -3.00    4.90
   7  13   1   -4.20    5.00
  -7  13  -1   -4.10    4.60
   7  13   1    9.30    4.20
  -8 -13  -1    5.70    6.90
   8 -13   1   -0.50    5.40
  -8 -13  -1   -4.40    3.20
   8  13   1    4.10    5.20
  -8  13  -1   -5.50    5.20
  -9 -13  -1   14.80    7.40
   9 -13   1   10.20    6.30
  -9  13  -1   23.30    6.50
   9  13   1   11.70    6.50
 -10 -13  -1    4.40    7.90
  10 -13   1    1.00    6.50
  10  13   1  -10.10    6.80
 -10  13  -1   -5.50    6.50
  -8 -14   1    0.10    6.70
  -8 -14   1    8.70    5.20
   8 -14  -1    1.50    6.10
   8  14  -1   10.30    7.00
  -8  14   1  -12.60    6.00
  -7 -14   1   -5.10    6.10
  -7 -14   1   -2.90    3.50
   7 -14  -1    0.70    6.20
  -7  14   1  -10.40    5.30
   7  14  -1   -2.40    5.80
  -6 -14   1    5.20    5.60
  -6 -14   1   -2.80    3.30
   6 -14  -1    2.10    4.90
  -6  14   1   -0.40    5.40
   6  14  -1    2.10    5.50
   5 -14  -1   -1.80    4.90
  -5 -14   1   -1.80    3.20
  -5 -14   1    6.30    6.00
  -5  14   1   -9.40    4.50
   5  14  -1   -5.10    4.70
  -4 -14   1    8.00    3.60
  -4 -14   1    1.00    5.10
   4 -14  -1   -3.80    4.50
   4  14  -1    3.40    3.90
   4  14  -1   -5.30    4.60
  -4  14   1    4.80    5.30
  -4  14   1    1.90    4.70
  -3 -14   1   -1.10    3.10
  -3 -14   1    3.30    4.30
   3 -14  -1   -0.80    4.00
  -3  14   1    0.50    5.00
   3  14  -1   -3.20    4.20
   3  14  -1    1.70    4.40
   2 -14  -1    1.50    3.90
  -2 -14   1    0.70    4.60
  -2  14   1   -7.70    5.40
   2  14  -1   -5.80    4.20
   2  14  -1   -2.30    4.00
  -2  14   1   11.10    5.10
   1 -14  -1   -3.50    3.60
   1 -14  -1   -0.60    3.00
  -1 -14   1    1.10    3.70
  -1 -14   1    1.30    4.20
   1  14  -1    4.40    4.60
   1  14  -1   -3.70    4.00
  -1  14   1   -1.90    4.60
  -1  14   1    0.90    4.50
   0 -14  -1    4.90    3.50
   0 -14   1    2.30    3.40
   0 -14   1    2.40    3.40
   0 -14  -1    4.90    4.20
   0  14   1   -4.80    5.30
   0  14   1    5.80    4.80
   0  14  -1    0.40    5.00
   0  14  -1    1.90    4.30
  -1 -14  -1    7.20    4.00
   1 -14   1    1.30    3.00
   1 -14   1   -2.90    3.50
  -1  14  -1    0.00    7.20
   1  14   1   -3.00    4.10
  -1  14  -1    8.40    4.80
   2 -14   1    0.60    3.70
  -2 -14  -1   20.00    4.80
  -2 -14  -1    6.80    3.80
   2  14   1   16.50    4.90
  -2  14  -1    6.80    5.50
   2  14   1    7.10    5.00
  -2  14  -1   13.70    5.30
   3 -14   1   -6.40    4.30
  -3 -14  -1    3.10    4.50
  -3 -14  -1   -1.70    3.10
   3  14   1    2.50    3.90
   3  14   1    3.00    4.20
  -3  14  -1   -3.40    4.20
  -3  14  -1   -0.30    4.80
   4 -14   1   -0.70    4.10
  -4 -14  -1    0.70    3.30
  -4 -14  -1    0.30    5.20
  -4  14  -1    3.20    4.60
   4  14   1    4.40    4.20
  -4  14  -1    2.20    5.60
   4  14   1    0.90    4.80
  -5 -14  -1   18.20    6.10
  -5 -14  -1    4.50    3.50
   5 -14   1   17.60    5.30
   5  14   1   10.70    5.40
   5  14   1   10.20    4.60
  -5  14  -1    3.90    5.20
   6 -14   1    1.30    5.40
  -6 -14  -1    5.80    5.80
  -6 -14  -1   -4.30    3.20
  -6  14  -1   -2.90    5.00
   6  14   1    6.60    5.80
  -7 -14  -1   22.40    4.40
  -7 -14  -1   38.90    7.70
   7 -14   1   26.00    6.30
  -7  14  -1   21.20    6.50
   7  14   1   22.50    6.50
   8 -14   1    7.70    6.10
  -8 -14  -1   -0.90    6.10
   8  14   1   -3.00    6.50
  -8  14  -1   -1.50    6.20
   6 -15  -1    4.70    6.60
  -6 -15   1   -4.30    7.10
  -6 -15   1    2.10    4.10
  -6  15   1   -4.70    6.00
   6  15  -1    6.20    6.40
  -5 -15   1   10.20    6.40
  -5 -15   1    4.10    4.40
   5 -15  -1    1.80    5.10
   5  15  -1    3.00    6.00
  -5  15   1    4.20    5.80
   4 -15  -1   11.20    4.80
  -4 -15   1   -1.60    5.70
  -4 -15   1   -6.90    3.90
  -4  15   1    0.80    5.30
  -4  15   1   -0.20    6.40
   4  15  -1    1.30    5.70
  -3 -15   1   -2.80    3.80
   3 -15  -1   -0.40    5.20
  -3 -15   1    2.50    5.00
   3  15  -1   -9.80    4.90
  -3  15   1   -3.10    4.80
  -2 -15   1   12.10    4.90
  -2 -15   1    3.30    3.90
   2 -15  -1    1.20    4.80
   2  15  -1    4.20    5.10
   2  15  -1    0.10    4.90
  -2  15   1   -0.40    4.90
  -2  15   1    6.90    6.00
   1 -15  -1   18.10    5.40
  -1 -15   1   19.80    4.90
  -1 -15   1   19.00    4.90
   1  15  -1   11.40    5.70
  -1  15   1   10.70    5.30
   1  15  -1    8.70    5.30
  -1  15   1   14.90    7.30
   0 -15  -1    2.30    4.00
   0 -15   1    4.70    4.00
   0 -15  -1   -2.10    3.90
   0 -15   1   -3.30    3.80
   0  15  -1    2.30    5.10
   0  15  -1   -1.20    5.20
   0  15   1    0.50    4.80
   0  15   1    1.10    5.20
  -1 -15  -1   15.30    4.90
   1 -15   1    2.10    3.80
  -1 -15  -1    0.40    3.70
  -1  15  -1   10.60    6.00
   1  15   1   13.60    5.50
   1  15   1    1.60    5.30
  -1  15  -1    8.90    5.30
  -2 -15  -1   -1.90    3.60
   2 -15   1   -1.20    4.50
  -2 -15  -1   -2.70    4.70
  -2  15  -1   -3.30    5.90
   2  15   1   -6.60    4.60
   2  15   1   -0.90    5.00
  -2  15  -1   -5.50    5.10
  -3 -15  -1    8.20    5.40
  -3 -15  -1   -0.50    3.80
   3 -15   1    4.80    5.10
  -3  15  -1    5.80    6.40
   3  15   1   -4.90    5.10
   3  15   1    4.10    5.70
  -3  15  -1   -4.60    5.30
  -4 -15  -1    0.70    6.20
  -4 -15  -1   -4.90    3.70
   4 -15   1    0.40    5.70
  -4  15  -1    3.70    5.50
   4  15   1   -0.90    5.30
   5 -15   1    0.60    5.70
  -5 -15  -1   11.30    6.40
  -5 -15  -1   -7.80    4.00
   5  15   1   -1.60    5.70
  -6 -15  -1   -1.50    3.90
  -6 -15  -1    5.90    7.00
   6 -15   1   -1.10    5.30
  -6  15  -1    6.40    6.40
   6  15   1   -6.10    6.10
  -3 -16   1   29.40    7.00
   3 -16  -1   16.40    6.70
  -3 -16   1   13.90    5.10
  -3  16   1    5.40    6.50
   3  16  -1   19.30    7.10
  -3  16   1   12.10    7.70
   2 -16  -1    2.20    5.20
  -2 -16   1    0.70    5.50
  -2 -16   1    0.30    4.50
   2  16  -1   -9.80    5.80
  -2  16   1    4.60    7.50
   1 -16  -1    1.60    5.10
  -1 -16   1   -0.90    5.10
   1  16  -1   22.00    7.00
  -1  16   1    8.60    8.10
  -1  16   1    2.70    6.10
   0 -16  -1    5.90    4.90
   0 -16   1    4.00    5.00
   0  16  -1    2.20    6.10
   0  16   1   17.10    6.80
   0  16   1    1.20    6.10
   1 -16   1    2.60    5.00
  -1 -16  -1    9.80    5.10
   1  16   1    9.00    6.20
  -1  16  -1   19.40    7.20
  -1  16  -1    0.80    6.00
  -2 -16  -1    5.60    5.60
   2 -16   1   12.00    6.00
  -2 -16  -1    2.20    4.90
  -2  16  -1   -2.20    6.20
   2  16   1    7.90    6.50
   3 -16   1   -6.40    4.50
  -3 -16  -1   -1.20    4.60
  -3 -16  -1   10.50    6.50
   3  16   1   14.10    6.50
  -3  16  -1   -3.20    6.30
 -17   0   2   -4.00    8.00
  17   0  -2   -1.80    7.20
  16   0  -2   -4.80    6.20
 -16   0   2   12.10    6.50
  15   0  -2    1.90    5.00
 -15   0   2   -4.10    4.90
 -14   0   2    7.90    4.40
  14   0  -2    3.80    4.40
  14   0  -2    6.10    3.30
 -13   0   2   21.90    4.30
  13   0  -2    9.20    3.90
  13   0  -2   16.70    2.80
 -12   0   2   37.40    4.50
  12   0  -2   33.10    3.70
  12   0  -2   31.50    3.60
  12   0  -2   34.60    4.90
  11   0  -2   16.80    2.20
  11   0  -2   20.60    3.70
 -11   0   2   14.30    3.20
 -11   0   2   15.80    3.10
  11   0  -2   12.00    2.20
 -10   0   2   12.70    2.80
  10   0  -2   12.20    2.90
 -10   0   2    7.00    2.70
  10   0  -2   10.20    1.80
  -9   0   2  159.98    8.50
   9   0  -2  174.18    7.30
  -9   0   2  180.68    8.20
   9   0  -2  190.08    8.10
   9   0  -2  179.68    8.40
   9   0  -2  179.28    7.50
   8   0  -2   78.99    3.80
   8   0  -2   79.79    4.70
   8   0  -2   84.29    4.00
   8   0  -2   80.49    5.00
   8   0  -2   78.69    5.00
  -8   0   2   76.79    4.90
  -8   0   2   84.79    4.60
   8   0  -2   84.69    4.60
  -7   0   2    0.60    1.60
   7   0  -2   -2.10    1.50
   7   0  -2    4.10    1.70
  -7   0   2   -0.60    1.30
   7   0  -2    0.60    1.60
   7   0  -2    0.10    0.90
   7   0  -2    0.60    0.80
   7   0  -2    0.60    1.60
   6   0  -2   19.80    2.40
   6   0  -2   19.10    2.20
   6   0  -2   18.20    2.20
   6   0  -2   14.30    2.10
  -6   0   2   18.90    2.00
   6   0  -2   17.10    1.70
   5   0  -2   72.99    3.90
  -5   0   2   70.19    3.90
   5   0  -2   72.89    3.80
   5   0  -2   80.69    3.90
   5   0  -2   78.69    3.30
  -5   0   2   69.89    3.60
   5   0  -2   76.89    3.70
   4   0  -2  888.71   32.30
  -4   0   2  862.31   32.20
  -4   0   2  870.61   32.30
   4   0  -2  881.81   32.30
   4   0  -2  835.92   32.10
   4   0  -2  887.71   32.20
  -3   0   2   15.60    1.40
   3   0  -2   17.20    1.10
   3   0  -2   15.30    1.20
   3   0  -2   15.70    1.30
  -3   0   2   15.20    1.20
  -3   0   2   14.80    1.10
  -2   0   2  805.02   30.10
   2   0  -2  819.92   30.10
  -2   0   2  812.52   29.90
   2   0  -2  825.02   30.10
  -2   0   2  827.52   30.10
  -2   0   2  808.62   30.10
   2   0  -2  847.12   30.00
   2   0  -2  826.02   30.10
   1   0  -2   -0.10    0.20
   1   0  -2    0.20    0.20
   1   0  -2    0.00    0.20
   1   0  -2    0.20    0.20
  -1   0  -2   95.29    3.50
   1   0   2   81.39    3.30
   1   0   2   93.09    3.70
  -1   0  -2   87.59    3.50
   2   0   2  677.43   25.10
  -2   0  -2  694.43   25.10
  -2   0  -2  671.33   25.00
  -2   0  -2  670.43   24.80
  -2   0  -2  689.43   25.10
   2   0   2  678.93   25.00
   2   0   2  706.93   25.10
   2   0   2  665.93   24.80
  -3   0  -2   14.10    1.20
   3   0   2   12.80    1.20
   3   0   2   13.90    1.40
  -3   0  -2   15.90    0.90
   3   0   2   15.40    1.50
   3   0   2   14.70    0.80
  -3   0  -2   16.00    1.50
  -3   0  -2   16.40    1.40
   4   0   2   44.40    2.30
  -4   0  -2   44.40    2.60
   4   0   2   41.50    1.90
  -4   0  -2   45.70    2.70
  -4   0  -2   43.50    2.40
   4   0   2   46.90    2.70
   4   0   2   43.60    2.50
   5   0   2   18.00    1.20
  -5   0  -2   17.90    1.80
   5   0   2   20.40    2.10
   5   0   2   17.50    1.70
   5   0   2   20.90    2.30
  -5   0  -2   20.10    2.40
   6   0   2   38.60    3.00
   6   0   2   42.50    2.60
   6   0   2   41.70    2.00
   6   0   2   43.80    2.10
   6   0   2   42.00    3.30
  -6   0  -2   39.40    2.70
  -6   0  -2   38.30    3.20
  -7   0  -2  138.39    7.20
  -7   0  -2  157.88    7.30
   7   0   2  154.48    6.10
   7   0   2  164.08    6.10
   7   0   2  156.68    6.70
   7   0   2  143.69    7.20
   7   0   2  159.48    7.10
   8   0   2   86.79    4.70
  -8   0  -2   93.29    4.90
   8   0   2   86.69    3.90
  -8   0  -2   93.29    5.40
   8   0   2   92.09    5.20
   8   0   2   90.69    4.00
   9   0   2   52.49    3.00
   9   0   2   55.29    4.30
   9   0   2   52.59    2.80
  -9   0  -2   50.09    4.40
   9   0   2   56.99    4.10
  -9   0  -2   57.19    4.00
  10   0   2   25.90    2.50
  10   0   2   27.20    2.30
 -10   0  -2   24.50    3.50
  10   0   2   32.80    4.00
 -10   0  -2   28.20    3.60
  11   0   2    3.60    1.40
  11   0   2    4.90    1.60
 -11   0  -2    5.00    2.70
 -11   0  -2    3.70    2.90
  11   0   2   -0.30    2.70
  12   0   2   18.30    2.20
  12   0   2   20.20    2.40
 -12   0  -2   23.70    3.80
  12   0   2   21.40    4.20
 -12   0  -2   19.80    4.10
  13   0   2   16.40    2.60
 -13   0  -2   15.20    4.40
  13   0   2   33.00    7.60
 -13   0  -2   18.80    4.20
  14   0   2    4.00    4.90
 -14   0  -2   11.20    4.70
  15   0   2   -1.90    5.70
 -15   0  -2    3.60    5.10
  16   0   2   13.10    7.00
 -16   0  -2   26.90    7.10
  17  -1  -2    1.30    7.00
  17   1  -2   -4.00    6.70
  16  -1  -2    1.50    6.10
  16   1  -2    4.90    6.10
 -15  -1   2    3.60    5.00
  15  -1  -2    2.10    5.60
 -15   1   2   11.40    5.50
  14  -1  -2    8.40    3.20
  14  -1  -2    5.60    4.70
 -14  -1   2   13.70    4.90
  14   1  -2   12.80    4.80
 -14   1   2   18.30    4.80
  13  -1  -2    6.40    2.70
  13  -1  -2    4.40    3.90
 -13  -1   2    7.20    3.80
 -13   1   2    3.70    3.70
  13   1  -2    5.10    2.30
 -13   1   2    6.70    3.90
  13   1  -2    5.30    3.70
  12  -1  -2   14.40    2.90
  12  -1  -2   22.50    4.20
 -12  -1   2   25.20    3.90
  12  -1  -2   27.40    3.30
 -12   1   2   27.80    4.50
  12   1  -2   25.30    4.20
 -12   1   2   25.40    3.90
  12   1  -2   16.30    2.40
  12   1  -2   20.30    3.20
  11  -1  -2    3.10    2.30
  11  -1  -2    1.00    2.60
 -11  -1   2    1.60    2.60
  11  -1  -2   -3.10    1.60
 -11   1   2   -0.70    2.70
  11   1  -2    1.80    1.80
 -11   1   2   -0.50    2.40
  11   1  -2    3.40    2.80
  10  -1  -2    3.70    1.60
 -10  -1   2    3.90    2.50
  10  -1  -2    4.80    2.50
  10  -1  -2    3.90    1.80
  10  -1  -2    6.40    2.60
  10   1  -2    5.50    2.60
  10   1  -2    2.90    1.40
  10   1  -2    4.20    1.70
 -10   1   2    6.60    2.20
 -10   1   2    4.50    2.40
   9  -1  -2   15.40    2.20
   9  -1  -2   18.20    2.10
   9  -1  -2   18.30    2.80
  -9  -1   2   18.50    2.70
   9  -1  -2   16.80    2.50
   9   1  -2   17.20    1.80
   9   1  -2   20.80    2.80
  -9   1   2   13.60    2.30
   9   1  -2   20.50    2.90
   9   1  -2   15.70    1.80
  -9   1   2   19.10    2.60
   8  -1  -2  351.76   15.30
   8  -1  -2  385.46   14.50
   8  -1  -2  376.56   14.40
  -8  -1   2  375.96   15.10
   8  -1  -2  380.26   14.70
   8  -1  -2  382.16   15.30
   8  -1  -2  360.16   15.30
   8   1  -2  390.86   14.20
  -8   1   2  354.86   15.30
   8   1  -2  381.56   15.10
   8   1  -2  377.16   15.10
   8   1  -2  367.76   15.20
  -7  -1   2    7.80    1.70
   7  -1  -2   11.40    2.20
   7  -1  -2    8.40    1.30
   7  -1  -2    9.60    1.80
   7  -1  -2    7.10    1.30
   7  -1  -2    6.70    2.20
   7  -1  -2    7.80    1.60
   7   1  -2   10.50    2.10
   7   1  -2    4.40    1.80
  -7   1   2    7.20    1.60
  -7   1   2    7.00    1.90
   7   1  -2    6.60    1.80
   7   1  -2    7.10    1.10
  -6  -1   2  167.08    7.40
   6  -1  -2  181.88    7.60
   6  -1  -2  176.38    7.00
   6  -1  -2  165.88    7.10
   6  -1  -2  161.68    6.90
   6  -1  -2  169.88    7.60
   6   1  -2  178.88    6.80
   6   1  -2  168.28    7.60
   6   1  -2  181.28    7.50
  -6   1   2  164.28    7.10
   6   1  -2  173.18    7.40
   5  -1  -2   40.70    2.20
   5  -1  -2   42.80    2.70
   5  -1  -2   35.30    2.70
  -5  -1   2   28.50    2.30
   5  -1  -2   36.40    2.20
  -5  -1   2   30.60    1.90
   5  -1  -2   36.50    2.10
  -5   1   2   36.20    2.60
  -5   1   2   36.80    2.20
   5   1  -2   37.30    2.70
   5   1  -2   33.70    2.40
   5   1  -2   34.10    2.10
   5   1  -2   33.60    2.40
  -4  -1   2   11.80    1.40
   4  -1  -2   10.80    1.10
   4  -1  -2   10.80    1.20
   4  -1  -2   11.30    1.50
   4  -1  -2   12.90    1.60
  -4  -1   2   10.80    1.00
   4   1  -2   10.20    1.20
   4   1  -2   11.50    1.00
   4   1  -2   10.60    1.40
   4   1  -2   13.40    1.40
  -4   1   2   11.00    1.20
  -4   1   2   10.40    1.50
   3  -1  -2    4.70    0.70
  -3  -1   2    4.30    0.60
   3  -1  -2    4.80    1.00
  -3  -1   2    4.30    0.90
   3  -1  -2    3.00    0.60
   3   1  -2    5.90    0.80
  -3   1   2    3.80    0.60
   3   1  -2    3.40    0.90
  -3   1   2    3.90    0.80
   3   1  -2    4.30    0.70
   3   1  -2    3.60    0.80
  -3   1   2    4.10    1.00
  -2  -1   2 1381.96   52.49
   2  -1  -2 1440.36   52.59
   2  -1  -2 1477.75   52.79
  -2  -1   2 1366.46   52.79
   2  -1  -2 1433.56   52.59
   2  -1  -2 1460.05   52.69
   2   1  -2 1620.84   53.19
  -2   1   2 1431.36   52.79
   2   1  -2 1397.76   52.49
   2   1  -2 1419.56   52.79
  -2   1   2 1464.75   52.69
   2   1  -2 1472.85   52.79
  -1  -1   2  424.16   15.60
   1  -1  -2  410.96   15.50
   1  -1  -2  405.86   15.50
  -1  -1   2  429.66   15.50
   1  -1  -2  413.86   15.50
  -1  -1   2  443.86   15.60
  -1   1   2  418.86   15.50
   1   1  -2  433.76   15.60
   1   1  -2  439.36   15.60
  -1   1   2  413.96   15.50
  -1   1   2  417.86   15.70
   1   1  -2  422.96   15.50
   0  -1  -2   15.30    0.90
   0  -1  -2   15.60    0.80
   0   1  -2   13.60    0.80
   0   1   2   14.60    1.20
   0   1  -2   14.50    0.90
   1  -1   2  767.32   28.30
  -1  -1  -2  792.42   28.30
   1  -1   2  733.03   28.20
   1  -1   2  756.82   28.30
  -1  -1  -2  800.12   28.10
   1  -1   2  746.73   28.10
  -1  -1  -2  782.12   28.30
   1   1   2  883.51   28.30
   1   1   2  760.02   28.30
  -1   1  -2  749.42   28.20
  -1   1  -2  751.82   28.10
   1   1   2  785.12   28.30
  -1   1  -2  747.43   28.30
   2  -1   2 8495.55  291.17
  -2  -1  -2 8015.50  290.77
  -2  -1  -2 8300.87  290.47
  -2  -1  -2 8183.48  290.97
   2  -1   2 7534.95  290.37
   2  -1   2 7760.82  289.37
   2  -1   2 7956.80  289.17
   2   1   2 7743.23  290.47
  -2   1  -2 7694.43  289.17
  -2   1  -2 7664.33  289.27
  -2   1  -2 8113.19  290.87
   2   1   2 8108.89  290.47
   2   1   2 8010.90  290.57
   3  -1   2  533.25   19.40
   3  -1   2  520.25   19.80
  -3  -1  -2  532.15   19.70
   3  -1   2  547.75   19.80
  -3  -1  -2  512.05   19.70
  -3  -1  -2  537.65   19.80
   3  -1   2  521.65   19.40
  -3   1  -2  511.55   19.40
  -3   1  -2  543.05   19.40
   3   1   2  526.55   19.70
   3   1   2  525.95   19.70
   3   1   2  528.25   19.80
  -3   1  -2  524.45   19.80
   4  -1   2  106.89    4.60
  -4  -1  -2  101.89    4.60
   4  -1   2  102.69    4.60
   4  -1   2  102.09    4.20
  -4  -1  -2   98.49    4.50
  -4  -1  -2   96.79    4.50
   4  -1   2  103.39    4.10
   4   1   2  100.19    4.50
  -4   1  -2   97.69    4.20
   4   1   2   97.09    3.80
  -4   1  -2  103.49    4.60
   4   1   2   97.99    4.40
  -4   1  -2  102.39    4.10
   4   1   2   94.89    4.60
   4   1   2  102.99    3.80
   5  -1   2   53.29    2.80
  -5  -1  -2   52.79    3.20
  -5  -1  -2   51.09    3.10
   5  -1   2   57.29    3.40
   5  -1   2   54.49    2.50
   5  -1   2   54.69    3.30
  -5  -1  -2   53.89    3.40
  -5   1  -2   60.19    2.60
   5   1   2   51.29    2.20
   5   1   2   54.69    3.10
  -5   1  -2   51.89    3.40
  -5   1  -2   55.29    2.80
   5   1   2   54.09    3.10
   5   1   2   53.79    2.30
   5   1   2   57.89    3.40
  -6  -1  -2  166.88    7.30
   6  -1   2  166.88    7.40
   6  -1   2  165.48    6.60
   6  -1   2  172.28    6.80
  -6  -1  -2  170.38    7.50
   6  -1   2  171.08    7.50
  -6  -1  -2  153.18    7.20
   6   1   2  164.18    7.50
   6   1   2  168.98    6.30
  -6   1  -2  164.98    7.50
  -6   1  -2  166.68    6.90
   6   1   2  159.18    6.30
   6   1   2  165.78    7.10
   7  -1   2  156.58    7.60
  -7  -1  -2  165.28    7.40
  -7  -1  -2  164.78    7.70
   7  -1   2  165.78    6.90
   7  -1   2  164.48    6.60
   7  -1   2  163.98    7.50
   7   1   2  169.68    7.40
   7   1   2  159.38    7.60
   7   1   2  170.28    6.30
  -7   1  -2  165.98    7.10
   7   1   2  165.98    6.30
   7   1   2  162.58    7.20
  -7   1  -2  157.88    7.60
   8  -1   2   89.99    5.10
   8  -1   2   87.69    4.10
   8  -1   2   85.49    3.90
  -8  -1  -2   82.29    5.20
  -8  -1  -2   85.79    4.80
   8  -1   2   89.99    4.50
   8   1   2   86.89    4.90
  -8   1  -2   77.19    5.10
   8   1   2   92.59    4.90
   8   1   2   80.39    3.70
   8   1   2   81.29    3.60
   9  -1   2   64.79    4.10
  -9  -1  -2   61.69    4.90
   9  -1   2   59.39    3.30
   9  -1   2   61.49    4.60
  -9  -1  -2   62.49    4.50
   9  -1   2   67.69    3.60
  -9   1  -2   59.79    4.10
   9   1   2   68.89    2.90
   9   1   2   69.79    4.90
  -9   1  -2   54.39    4.80
   9   1   2   72.99    4.60
   9   1   2   60.59    3.50
  10  -1   2   99.69    6.40
 -10  -1  -2  111.79    6.20
  10  -1   2  101.09    4.80
  10  -1   2   94.89    5.00
 -10  -1  -2  101.99    6.60
  10  -1   2  101.09    5.70
  10   1   2   99.09    4.40
 -10   1  -2   96.89    6.50
  10   1   2  108.79    4.40
 -10   1  -2  110.19    5.80
  10   1   2  101.99    6.20
  11  -1   2    1.50    2.80
  11  -1   2    2.70    1.80
 -11  -1  -2    2.90    2.60
  11   1   2    1.80    1.30
 -11   1  -2    2.80    2.40
  11   1   2    4.70    1.20
  11   1   2    4.00    2.90
 -11   1  -2    1.80    2.50
  12  -1   2   13.70    3.80
  12  -1   2   10.80    2.50
  12  -1   2    8.70    2.30
 -12  -1  -2   16.60    3.60
 -12   1  -2   13.30    3.30
 -12   1  -2   10.60    3.50
  12   1   2   12.60    1.90
  12   1   2    9.10    3.70
  12   1   2    7.50    1.60
  13  -1   2   21.50    5.00
  13  -1   2   33.00    3.70
 -13  -1  -2   34.80    4.90
  13   1   2   41.80    5.60
  13   1   2   31.30    2.90
 -13   1  -2   44.10    5.30
  14  -1   2   -1.40    2.90
 -14  -1  -2    5.70    4.50
  14   1   2   -1.70    4.40
 -14   1  -2    0.70    4.10
 -14   1  -2    2.50    4.10
 -15  -1  -2    5.50    5.10
  15  -1   2    7.20    5.70
 -15   1  -2    2.00    5.10
  15   1   2    2.20    5.60
  16  -1   2   -0.90    6.80
 -16  -1  -2    6.90    7.80
 -16   1  -2    0.40    6.20
  16   1   2   -5.40    6.00
 -16  -2   2   -1.40    6.30
  16  -2  -2   -8.40    6.30
  16   2  -2   -5.70    5.40
  16   2  -2   -9.80    5.40
  15  -2  -2   41.10    5.10
 -15  -2   2   52.39    7.10
  15  -2  -2   32.90    7.10
 -15   2   2   43.40    7.30
  15   2  -2   40.90    7.30
 -14  -2   2    5.80    4.70
  14  -2  -2   18.20    5.90
  14  -2  -2   10.70    3.50
  14   2  -2    7.30    4.50
  13  -2  -2   54.39    6.50
  13  -2  -2   55.59    5.00
 -13  -2   2   71.59    6.30
 -13   2   2   64.19    5.80
  13   2  -2   47.20    6.40
 -13   2   2   51.89    7.00
  12  -2  -2   -0.20    3.30
 -12  -2   2    5.40    3.30
  12  -2  -2    5.10    2.40
 -12   2   2    0.00    3.00
  12   2  -2   -1.90    3.00
  12   2  -2   -0.80    1.80
 -12   2   2    2.80    2.90
  12   2  -2    0.30    1.80
  11  -2  -2   18.60    2.40
  11  -2  -2   17.30    3.30
  11  -2  -2   16.30    3.70
  11  -2  -2   14.20    2.80
 -11  -2   2   17.70    3.40
  11   2  -2   13.20    3.10
  11   2  -2   12.10    1.80
 -11   2   2   14.10    3.10
  11   2  -2   10.50    1.80
 -11   2   2   11.50    3.20
 -10  -2   2   17.80    3.10
  10  -2  -2   18.40    2.60
  10  -2  -2   20.10    2.60
  10  -2  -2   20.90    3.50
  10  -2  -2   23.40    3.30
 -10   2   2   17.40    3.10
  10   2  -2   17.20    2.00
  10   2  -2   12.70    1.70
  10   2  -2   27.80    3.40
  -9  -2   2   -2.30    1.90
   9  -2  -2    2.20    1.90
   9  -2  -2    0.50    1.80
   9  -2  -2    1.30    2.30
   9  -2  -2   -0.40    1.30
   9   2  -2    0.30    1.90
   9   2  -2    0.10    1.20
  -9   2   2    1.70    2.00
   8  -2  -2   30.90    2.70
  -8  -2   2   25.30    2.90
   8  -2  -2   28.40    3.90
   8  -2  -2   33.80    2.60
   8  -2  -2   35.00    3.40
   8  -2  -2   28.80    2.70
   8   2  -2   29.10    2.10
   8   2  -2   32.90    3.00
  -8   2   2   25.40    2.70
  -8   2   2   31.20    3.30
   8   2  -2   29.70    3.30
   7  -2  -2   41.50    2.90
   7  -2  -2   40.20    3.50
   7  -2  -2   46.70    3.80
   7  -2  -2   45.00    2.90
   7  -2  -2   41.10    2.60
  -7  -2   2   42.70    2.40
  -7  -2   2   46.80    3.30
   7   2  -2   46.30    2.30
  -7   2   2   40.10    3.40
   7   2  -2   34.10    3.40
  -7   2   2   43.40    2.80
   7   2  -2   44.40    3.60
   6  -2  -2    0.20    1.90
   6  -2  -2    5.00    1.40
  -6  -2   2    5.50    1.00
   6  -2  -2    1.40    1.00
  -6  -2   2    3.30    1.60
   6   2  -2    5.50    0.90
  -6   2   2    2.60    2.20
   6   2  -2    9.30    1.60
   6   2  -2    5.50    1.60
   6   2  -2    5.40    1.70
   5  -2  -2   36.60    2.40
   5  -2  -2   41.40    3.10
  -5  -2   2   45.20    2.90
   5  -2  -2   42.60    2.90
  -5  -2   2   43.20    2.20
   5   2  -2   42.30    2.30
  -5   2   2   39.50    2.30
  -5   2   2   38.20    2.90
   5   2  -2   46.90    2.60
   5   2  -2   45.30    3.10
   5   2  -2   45.30    3.00
   4  -2  -2  107.79    4.50
  -4  -2   2  102.59    4.30
   4  -2  -2  115.79    4.80
   4  -2  -2  112.89    4.40
  -4  -2   2  101.19    4.80
   4  -2  -2  114.49    5.00
  -4  -2   2  104.79    4.50
   4   2  -2   99.79    4.90
   4   2  -2  101.39    4.30
   4   2  -2   99.69    4.80
  -4   2   2  113.49    5.00
  -4   2   2  112.29    4.80
   4   2  -2  103.19    4.50
   3  -2  -2 2913.61  112.19
  -3  -2   2 2806.12  112.09
   3  -2  -2 3369.16  112.49
   3  -2  -2 2839.22  111.89
   3  -2  -2 3100.69  111.99
   3  -2  -2 2939.01  111.99
  -3  -2   2 3368.66  112.99
  -3  -2   2 3431.66  113.09
   3   2  -2 3344.17  112.59
  -3   2   2 2848.52  112.19
   3   2  -2 2821.52  112.09
  -3   2   2 3309.07  113.39
  -3   2   2 2898.31  111.89
   3   2  -2 3267.37  112.59
   3   2  -2 2969.60  112.09
   2  -2  -2   18.00    1.40
  -2  -2   2   17.00    1.50
   2  -2  -2   19.60    1.60
   2  -2  -2   24.80    1.50
  -2  -2   2   20.40    1.20
  -2  -2   2   21.50    1.60
  -2  -2   2   22.70    1.10
   2   2  -2   22.10    1.20
  -2   2   2   23.50    1.50
  -2   2   2   18.50    1.10
   2   2  -2   21.40    1.10
  -2   2   2   18.20    1.60
  -2   2   2   19.40    1.40
   2   2  -2   20.00    1.60
   2   2  -2   19.60    1.60
  -1  -2   2   62.99    2.80
  -1  -2   2   61.79    2.60
   1  -2  -2   63.89    2.70
   1  -2  -2   63.69    2.50
  -1  -2   2   59.89    2.70
   1  -2  -2   62.29    2.80
  -1  -2   2   58.39    2.40
   1  -2  -2   63.49    2.70
  -1   2   2   65.09    2.70
  -1   2   2   65.89    2.70
  -1   2   2   66.79    2.50
  -1   2   2   61.69    2.90
   1   2  -2   61.39    2.80
   1   2  -2   60.29    2.80
   1   2  -2   62.09    2.60
   1   2  -2   58.29    2.40
   0  -2   2   24.80    1.50
   0  -2  -2   26.70    1.40
   0  -2  -2   26.60    1.50
   0  -2  -2   29.30    1.50
   0  -2   2   26.60    1.40
   0  -2  -2   27.70    1.40
   0  -2   2   24.30    1.30
   0  -2   2   27.00    1.30
   0   2  -2   25.90    1.40
   0   2   2   25.40    1.50
   0   2  -2   26.00    1.40
   0   2   2   27.80    1.40
   0   2  -2   26.40    1.30
   0   2   2   28.10    1.40
   0   2  -2   26.90    1.60
   0   2   2   26.80    1.40
   1  -2   2   47.50    2.10
   1  -2   2   45.10    2.00
  -1  -2  -2   41.30    2.10
  -1  -2  -2   37.30    2.10
  -1  -2  -2   41.70    2.10
  -1  -2  -2   40.30    1.80
   1  -2   2   46.50    2.20
   1   2   2   41.40    2.10
  -1   2  -2   47.00    1.80
  -1   2  -2   45.50    2.00
   1   2   2   42.40    1.80
   1   2   2   39.20    2.00
   1   2   2   42.70    2.10
  -1   2  -2   46.70    2.20
  -1   2  -2   45.20    2.10
   2  -2   2  181.88    7.00
  -2  -2  -2  193.98    7.10
   2  -2   2  193.28    7.60
  -2  -2  -2  196.48    7.40
   2  -2   2  177.58    7.30
  -2  -2  -2  188.18    7.50
   2  -2   2  181.68    7.60
   2   2   2  201.28    7.40
   2   2   2  195.28    7.10
  -2   2  -2  202.78    7.60
   2   2   2  197.48    7.50
   2   2   2  199.08    7.50
  -2   2  -2  175.48    7.00
   3  -2   2  950.90   36.10
   3  -2   2 1002.90   36.50
  -3  -2  -2  988.20   36.50
   3  -2   2 1018.20   36.50
   3  -2   2  969.90   35.90
  -3  -2  -2 1009.00   36.30
  -3  -2  -2  994.80   35.80
  -3   2  -2  968.70   36.50
   3   2   2  978.70   35.80
   3   2   2 1023.40   36.50
   3   2   2  964.30   36.30
  -3   2  -2  936.11   35.90
   3   2   2 1029.30   36.40
  -3   2  -2  986.00   36.20
  -4  -2  -2    4.90    1.20
   4  -2   2    6.30    0.90
   4  -2   2    6.80    1.50
  -4  -2  -2    5.30    0.60
   4  -2   2    7.20    1.30
  -4  -2  -2    5.10    1.30
   4   2   2    4.40    1.10
   4   2   2    7.20    1.20
  -4   2  -2    7.80    1.10
   4   2   2    5.70    0.50
   4   2   2    5.70    1.30
  -4   2  -2    6.50    0.90
   5  -2   2   -0.20    0.80
   5  -2   2    1.60    0.80
  -5  -2  -2    2.00    1.30
   5  -2   2    1.00    1.10
  -5  -2  -2   -0.50    1.30
   5  -2   2    1.30    1.50
   5   2   2    2.40    1.20
  -5   2  -2    2.20    1.70
  -5   2  -2    1.60    1.00
  -5   2  -2    1.00    0.90
   5   2   2   -1.60    1.30
   5   2   2    1.80    1.20
   5   2   2    1.70    0.50
   6  -2   2   22.00    2.90
   6  -2   2   22.70    2.50
   6  -2   2   20.30    1.70
   6  -2   2   21.90    1.80
   6  -2   2   19.90    2.50
  -6  -2  -2   17.40    2.40
  -6  -2  -2   15.90    2.30
  -6   2  -2   18.50    2.60
   6   2   2   20.40    2.70
   6   2   2   18.40    2.50
   6   2   2   20.50    1.10
  -6   2  -2   18.80    1.80
  -6   2  -2   25.40    2.00
  -7  -2  -2   27.10    2.80
   7  -2   2   26.80    3.50
  -7  -2  -2   21.70    2.70
   7  -2   2   30.50    2.20
   7  -2   2   21.30    3.00
   7  -2   2   31.40    3.00
   7  -2   2   30.20    2.20
   7   2   2   28.90    1.50
   7   2   2   28.90    1.50
  -7   2  -2   29.40    3.10
  -7   2  -2   33.50    2.30
   7   2   2   32.00    3.10
   7   2   2   25.80    2.80
   7   2   2   29.90    3.30
   8  -2   2    4.80    1.30
  -8  -2  -2    4.00    1.90
   8  -2   2    7.60    1.60
   8  -2   2    4.40    2.10
   8   2   2    5.60    0.70
   8   2   2    5.80    0.80
   8   2   2    7.80    2.20
  -8   2  -2    7.30    1.70
   8   2   2    5.90    2.10
  -8   2  -2    3.30    1.70
   9  -2   2   13.70    2.00
  -9  -2  -2    5.90    2.40
   9  -2   2   11.00    2.50
   9   2   2    9.00    1.00
  -9   2  -2   13.00    2.60
   9   2   2   12.70    2.70
   9   2   2    9.70    1.00
  10  -2   2    3.50    1.70
 -10  -2  -2    4.30    2.70
  10  -2   2    5.90    2.40
  10  -2   2    4.80    2.00
  10  -2   2    6.40    2.80
 -10   2  -2    8.40    2.40
  10   2   2    4.00    2.60
  10   2   2    4.00    0.90
  10   2   2    3.10    1.00
 -10   2  -2    4.50    2.70
  11  -2   2   52.99    4.60
  11  -2   2   50.09    3.90
  11  -2   2   53.29    5.50
  11  -2   2   49.99    4.40
 -11  -2  -2   67.69    5.10
  11   2   2   59.39    2.60
 -11   2  -2   55.09    4.70
  11   2   2   49.00    5.10
 -11   2  -2   48.40    5.60
  12  -2   2    3.10    2.20
  12  -2   2    0.60    3.50
 -12  -2  -2    4.10    3.20
  12  -2   2    4.70    2.80
  12   2   2    3.60    3.40
 -12   2  -2    4.20    2.90
 -12   2  -2    5.90    3.10
  13  -2   2    5.10    4.50
 -13  -2  -2    8.60    4.30
  13  -2   2    9.60    2.90
  13   2   2    6.30    4.20
 -13   2  -2    2.80    3.70
 -13   2  -2    5.30    3.70
 -14  -2  -2    1.80    4.70
  14  -2   2    5.10    5.10
  14  -2   2    6.20    4.00
 -14   2  -2    4.50    4.50
 -14   2  -2   -0.30    4.30
  14   2   2   -2.80    4.30
  15  -2   2    1.20    5.50
 -15  -2  -2    6.50    5.70
  15   2   2    2.20    5.40
 -15   2  -2   10.10    5.40
 -15   2  -2    6.80    5.20
  16  -2   2    8.30    6.90
 -16  -2  -2   -1.20    6.40
  16   2   2    5.30    6.10
 -16   2  -2   13.00    6.50
  16  -3  -2   -5.20    6.60
 -16  -3   2    7.00    7.20
  16   3  -2   -6.20    5.70
 -16   3   2   10.70    6.50
  16   3  -2   -0.40    6.20
  15  -3  -2   23.10    5.40
  15  -3  -2   18.10    6.80
 -15  -3   2   27.20    6.30
 -15   3   2   16.60    6.00
  15   3  -2   26.90    5.70
  15   3  -2   18.30    5.50
  14  -3  -2    8.10    3.80
  14  -3  -2    5.80    5.30
 -14  -3   2   11.10    4.90
  14   3  -2    2.40    4.20
  14   3  -2    5.00    4.20
  13  -3  -2    3.60    2.90
 -13  -3   2    7.50    4.20
  13  -3  -2   -1.80    3.90
 -13   3   2    0.00    3.40
  13   3  -2    6.00    2.00
  13   3  -2   -3.80    3.40
  13   3  -2   -0.20    3.60
  12  -3  -2    3.80    2.50
  12  -3  -2   12.50    4.00
 -12  -3   2    9.10    3.60
 -12   3   2    1.90    3.30
  12   3  -2    5.80    3.30
  12   3  -2    4.80    1.70
  12   3  -2    2.60    1.80
  12   3  -2    8.20    3.20
  11  -3  -2   20.40    4.10
  11  -3  -2   19.40    2.70
  11  -3  -2   25.50    3.60
 -11  -3   2   13.80    3.50
  11   3  -2   16.20    1.90
  11   3  -2   14.00    3.30
 -11   3   2   19.10    3.80
  11   3  -2   14.90    1.90
  11   3  -2   11.60    3.30
  10  -3  -2    7.50    2.20
  10  -3  -2    7.80    3.10
 -10  -3   2    2.70    2.70
  10  -3  -2    6.00    1.90
  10  -3  -2    5.20    3.00
  10   3  -2    5.30    2.60
 -10   3   2    4.90    2.60
  10   3  -2    4.10    1.40
  -9  -3   2   -2.70    2.10
   9  -3  -2   -0.80    1.50
   9  -3  -2   -1.80    2.30
   9  -3  -2    3.20    1.70
   9  -3  -2    2.20    2.00
   9   3  -2    0.00    2.10
   9   3  -2    0.10    1.20
  -9   3   2    2.10    1.90
   9   3  -2   -1.70    2.00
   8  -3  -2   75.69    3.80
  -8  -3   2   68.99    4.60
  -8  -3   2   72.49    3.50
   8  -3  -2   78.49    4.10
   8   3  -2   72.59    3.50
  -8   3   2   74.79    4.80
   8   3  -2   69.49    4.90
   8   3  -2   72.39    4.40
   7  -3  -2    4.70    1.20
   7  -3  -2    5.50    1.40
  -7  -3   2    4.20    1.10
   7  -3  -2   11.20    2.70
   7  -3  -2    3.80    2.00
  -7  -3   2    4.00    1.80
   7   3  -2    5.80    1.00
   7   3  -2    1.60    1.40
  -7   3   2    3.50    1.60
   7   3  -2   -0.40    1.80
   7   3  -2    2.50    1.90
  -6  -3   2   -2.20    1.30
   6  -3  -2    2.90    1.90
  -6  -3   2    1.30    0.80
   6  -3  -2   -0.60    1.50
   6   3  -2    0.90    1.50
   6   3  -2    0.50    0.80
   6   3  -2    0.80    1.20
   6   3  -2    1.40    1.20
   6   3  -2   -0.60    1.70
  -6   3   2    0.60    1.30
   5  -3  -2    1.10    1.60
  -5  -3   2    3.40    1.20
   5  -3  -2    1.80    1.10
  -5  -3   2    3.00    1.60
   5  -3  -2    3.70    1.30
  -5  -3   2    6.20    1.00
  -5   3   2    4.30    1.40
   5   3  -2    5.30    1.20
   5   3  -2    4.20    0.90
   5   3  -2   -0.20    1.70
   5   3  -2    4.80    1.50
  -5   3   2    2.70    1.70
   4  -3  -2   45.40    3.20
   4  -3  -2   45.20    2.20
   4  -3  -2   45.40    2.20
  -4  -3   2   49.70    3.00
   4  -3  -2   50.39    3.00
  -4  -3   2   51.09    2.70
  -4  -3   2   56.19    2.50
   4  -3  -2   45.40    2.70
   4   3  -2   49.99    3.10
   4   3  -2   55.39    2.60
  -4   3   2   45.60    2.70
   4   3  -2   55.79    2.40
  -4   3   2   46.20    3.00
   4   3  -2   49.70    3.10
  -4   3   2   43.60    3.10
   3  -3  -2   11.40    0.90
   3  -3  -2   10.90    1.40
   3  -3  -2   12.70    1.80
  -3  -3   2   12.10    1.10
  -3  -3   2   11.70    1.60
   3  -3  -2   16.10    1.60
  -3  -3   2   13.50    1.20
   3   3  -2   13.00    1.70
  -3   3   2   11.80    1.60
  -3   3   2   12.70    1.50
   3   3  -2   13.10    1.10
   3   3  -2   13.90    1.10
  -3   3   2   12.30    1.70
  -2  -3   2   26.30    2.00
   2  -3  -2   24.80    1.30
  -2  -3   2   23.60    1.80
   2  -3  -2   26.60    2.00
  -2  -3   2   25.50    1.30
   2  -3  -2   28.00    1.70
   2  -3  -2   25.90    1.70
  -2  -3   2   25.50    1.50
  -2   3   2   28.00    1.80
  -2   3   2   26.80    1.30
   2   3  -2   25.90    1.90
   2   3  -2   25.00    1.90
   2   3  -2   24.20    1.50
   2   3  -2   24.20    1.30
  -2   3   2   25.80    1.70
  -2   3   2   24.70    1.90
  -1  -3   2   77.09    3.40
   1  -3  -2   73.29    3.30
   1  -3  -2   73.19    3.10
   1  -3  -2   77.29    3.50
   1  -3  -2   71.19    3.50
  -1  -3   2   78.89    3.10
  -1  -3   2   77.59    3.30
  -1  -3   2   83.49    3.60
   1   3  -2   81.99    3.30
  -1   3   2   73.49    3.50
   1   3  -2   80.39    3.60
  -1   3   2   76.59    3.40
   1   3  -2   78.89    3.10
   1   3  -2   75.49    3.70
  -1   3   2   76.19    3.10
  -1   3   2   76.99    3.40
   0  -3   2   11.00    1.20
   0  -3  -2    7.90    1.00
   0  -3   2   10.00    1.00
   0  -3  -2    9.40    1.00
   0  -3   2    7.10    0.90
   0  -3   2    9.30    0.90
   0  -3  -2    7.20    0.90
   0   3   2    7.40    1.10
   0   3  -2    8.80    1.00
   0   3   2    7.80    1.10
   0   3  -2   10.10    1.20
   0   3  -2    8.80    0.90
   0   3  -2    9.70    1.00
   0   3   2    6.70    0.90
   0   3   2    9.60    1.00
   1  -3   2  268.17   11.20
  -1  -3  -2  295.07   11.10
   1  -3   2  290.37   10.70
   1  -3   2  297.77   11.10
  -1  -3  -2  285.27   11.00
   1  -3   2  281.37   10.90
  -1  -3  -2  289.07   10.80
   1   3   2  294.17   10.80
   1   3   2  282.47   11.00
  -1   3  -2  292.97   10.70
   1   3   2  298.37   11.00
  -1   3  -2  285.87   11.10
   1   3   2  286.07   11.00
  -1   3  -2  292.27   11.00
  -1   3  -2  290.37   11.00
  -2  -3  -2   13.80    1.00
   2  -3   2   17.60    1.70
  -2  -3  -2   15.60    1.40
   2  -3   2   15.90    1.60
   2  -3   2   14.00    1.30
  -2  -3  -2   17.30    1.60
  -2  -3  -2   14.00    1.40
  -2   3  -2   15.50    0.70
  -2   3  -2   17.50    1.40
   2   3   2   14.90    1.00
   2   3   2   14.80    1.50
  -2   3  -2   16.70    1.60
  -2   3  -2   17.20    1.60
  -2   3  -2   16.20    0.80
   2   3   2   13.80    1.50
   2   3   2   13.90    1.30
  -3  -3  -2   73.59    3.50
   3  -3   2   69.89    3.60
   3  -3   2   68.39    3.20
  -3  -3  -2   67.29    2.80
   3  -3   2   60.99    3.50
  -3  -3  -2   70.99    3.30
   3   3   2   67.99    2.80
   3   3   2   67.39    3.40
  -3   3  -2   66.49    3.50
   3   3   2   65.59    3.20
   3   3   2   73.39    3.50
  -3   3  -2   67.39    3.20
  -4  -3  -2   49.10    2.10
  -4  -3  -2   50.29    2.80
   4  -3   2   43.40    2.50
   4  -3   2   43.80    1.90
  -4  -3  -2   42.40    3.00
   4  -3   2   41.40    3.10
   4  -3   2   46.30    3.10
   4   3   2   46.20    3.20
  -4   3  -2   39.40    1.90
   4   3   2   51.59    2.80
   4   3   2   49.10    3.00
   4   3   2   48.10    2.00
  -4   3  -2   48.20    3.20
   4   3   2   46.70    3.00
  -4   3  -2   45.90    2.60
   5  -3   2   47.90    3.60
  -5  -3  -2   43.80    3.20
   5  -3   2   47.50    2.20
   5  -3   2   50.69    2.80
  -5  -3  -2   47.80    3.00
   5  -3   2   55.39    3.60
  -5  -3  -2   46.60    2.10
   5   3   2   46.40    3.50
  -5   3  -2   46.30    2.20
  -5   3  -2   49.70    2.90
  -5   3  -2   50.29    3.40
   5   3   2   51.49    3.10
   5   3   2   50.29    2.10
   5   3   2   46.40    3.20
   6  -3   2   33.90    3.10
  -6  -3  -2   33.50    2.80
  -6  -3  -2   30.90    3.00
   6  -3   2   33.60    3.40
  -6  -3  -2   31.60    1.60
   6  -3   2   33.70    2.00
   6  -3   2   37.70    3.30
   6  -3   2   30.20    2.40
  -6   3  -2   39.10    3.20
  -6   3  -2   33.20    2.50
   6   3   2   36.60    3.30
   6   3   2   35.10    1.60
  -6   3  -2   35.50    2.00
   6   3   2   29.00    3.10
  -7  -3  -2    7.70    2.00
   7  -3   2    8.50    2.40
   7  -3   2    9.30    1.30
  -7  -3  -2    7.40    1.90
   7  -3   2    7.40    2.10
  -7   3  -2    7.60    1.60
   7   3   2    8.40    1.80
  -7   3  -2    8.10    1.90
   7   3   2    7.40    0.80
   7   3   2    5.50    2.30
   7   3   2    6.50    2.20
  -7   3  -2    7.50    1.30
   8  -3   2    6.20    2.20
   8  -3   2    9.10    1.60
  -8  -3  -2    9.50    2.30
   8  -3   2   10.50    1.60
  -8  -3  -2   10.10    2.40
  -8   3  -2    6.00    1.50
   8   3   2    7.80    0.90
  -8   3  -2    6.40    2.10
   8   3   2    9.90    2.20
  -9  -3  -2   31.40    3.80
   9  -3   2   33.10    3.90
   9  -3   2   36.30    2.90
   9  -3   2   38.90    2.90
  -9   3  -2   30.60    2.90
  -9   3  -2   30.00    4.10
   9   3   2   35.40    3.70
 -10  -3  -2   11.20    2.90
  10  -3   2   12.90    2.20
  10  -3   2   13.70    2.30
  10  -3   2   10.40    3.00
 -10   3  -2    7.60    3.80
 -10   3  -2   10.30    2.80
  10   3   2    7.80    2.60
  11  -3   2    7.40    3.30
 -11  -3  -2    4.10    3.10
  11  -3   2    2.60    2.70
  11  -3   2    4.30    2.10
  11  -3   2    3.40    2.70
  11   3   2    6.30    3.00
 -11   3  -2    2.50    2.80
 -11   3  -2    5.40    2.70
  12  -3   2    2.20    2.50
 -12  -3  -2    9.30    3.50
  12  -3   2    3.10    3.80
 -12   3  -2   -0.70    3.10
  12   3   2   -0.60    3.20
 -12   3  -2    2.00    2.90
 -13  -3  -2   10.50    4.70
  13  -3   2    9.80    3.00
  13  -3   2    2.50    4.10
 -13   3  -2    4.10    3.90
  13   3   2    2.10    4.00
 -13   3  -2    6.50    3.80
 -14  -3  -2   49.30    7.00
  14  -3   2   31.20    4.80
  14  -3   2   28.20    6.50
 -14   3  -2   37.60    5.50
  14   3   2   26.90    5.60
 -14   3  -2   22.20    5.10
  15  -3   2   14.90    6.50
 -15  -3  -2   23.40    6.40
 -15   3  -2   20.60    6.30
  15   3   2    4.10    5.10
  15   3   2   15.40    6.10
 -16  -3  -2   15.60    7.50
  16  -3   2  -15.20    6.80
 -16   3  -2   -1.40    6.50
  16   3   2   -1.80    5.70
  16   3   2  -10.40    6.00
 -16  -4   2   22.90    9.00
  16  -4  -2   15.70    7.50
  16   4  -2    7.60    5.80
  16   4  -2   13.90    6.20
 -16   4   2   15.10    6.90
 -15  -4   2    2.40    5.90
  15  -4  -2   -1.20    5.10
  15  -4  -2   -0.60    6.10
  15   4  -2   -2.20    5.10
 -15   4   2   -6.00    5.10
  15   4  -2   -0.20    4.60
  14  -4  -2   10.20    5.80
  14  -4  -2    7.60    4.20
 -14   4   2   16.30    5.50
  14   4  -2    6.00    4.70
  14   4  -2    7.00    4.70
  13  -4  -2    2.30    4.20
 -13  -4   2    1.20    4.30
  13  -4  -2   11.20    3.50
  13   4  -2    6.00    3.90
  13   4  -2    2.80    3.90
 -13   4   2    4.20    4.20
  13   4  -2    2.20    2.10
  12  -4  -2   36.40    5.40
 -12  -4   2   45.80    5.60
  12  -4  -2   41.60    4.70
  12   4  -2   47.70    6.00
 -12   4   2   52.69    6.20
  12   4  -2   43.90    5.20
  12   4  -2   43.20    3.20
  11  -4  -2    0.70    2.30
  11  -4  -2    3.20    2.50
  11  -4  -2    0.70    3.10
 -11  -4   2   -1.40    3.10
  11   4  -2   -0.30    2.60
  11   4  -2    1.80    2.80
 -11   4   2    1.70    2.80
  10  -4  -2  108.99    5.30
 -10  -4   2  115.79    6.90
  10  -4  -2  108.49    7.10
  10  -4  -2  111.39    6.00
  10   4  -2  107.69    5.00
  10   4  -2  113.39    7.00
 -10   4   2   99.59    6.90
  10   4  -2  106.09    6.30
   9  -4  -2    2.40    1.60
  -9  -4   2    2.70    2.40
   9  -4  -2    6.30    1.80
  -9  -4   2    2.80    1.30
   9   4  -2    0.60    1.90
   9   4  -2    5.90    2.10
  -9   4   2    4.90    2.30
   9   4  -2   -0.40    1.30
  -8  -4   2    2.00    1.90
   8  -4  -2    1.20    1.50
  -8  -4   2    1.80    1.10
   8  -4  -2    1.50    1.20
   8   4  -2    0.40    1.70
   8   4  -2    0.80    1.10
   8   4  -2    2.50    1.80
  -8   4   2    0.30    1.80
  -7  -4   2   33.80    3.00
  -7  -4   2   38.50    2.30
   7  -4  -2   31.50    3.60
   7  -4  -2   36.70    2.20
   7  -4  -2   41.30    2.90
  -7  -4   2   33.10    3.40
   7  -4  -2   37.90    2.20
  -7   4   2   38.00    3.40
   7   4  -2   36.30    2.90
   7   4  -2   37.30    2.30
   7   4  -2   36.90    3.40
  -6  -4   2   39.40    2.20
  -6  -4   2   34.50    3.10
  -6  -4   2   36.90    2.60
   6  -4  -2   32.80    1.90
   6  -4  -2   32.30    3.50
   6  -4  -2   29.90    2.60
   6  -4  -2   32.10    1.80
   6  -4  -2   32.30    3.30
  -6   4   2   36.20    2.80
   6   4  -2   38.70    3.10
  -6   4   2   38.20    3.30
  -6   4   2   33.70    3.10
   6   4  -2   37.10    3.20
   6   4  -2   39.50    2.50
   6   4  -2   37.50    2.20
   5  -4  -2    0.30    1.10
  -5  -4   2    0.70    0.90
   5  -4  -2    0.90    1.30
   5  -4  -2   -0.30    0.60
   5  -4  -2    1.30    0.60
  -5  -4   2   -0.20    1.00
  -5  -4   2   -0.40    1.30
   5  -4  -2   -0.50    1.70
   5   4  -2    1.10    0.80
   5   4  -2    1.90    1.10
  -5   4   2   -0.10    1.50
   5   4  -2   -0.10    1.60
   5   4  -2    0.80    1.20
  -5   4   2   -2.00    1.20
  -4  -4   2   11.30    1.80
  -4  -4   2   10.40    1.30
   4  -4  -2    9.70    0.80
   4  -4  -2    9.10    2.20
   4  -4  -2    9.40    0.80
  -4  -4   2    9.50    1.20
   4  -4  -2    8.20    1.50
   4   4  -2    9.30    1.30
   4   4  -2    7.50    1.90
  -4   4   2    9.80    1.60
   4   4  -2   10.60    1.20
  -4   4   2   11.20    1.60
   3  -4  -2    0.40    0.50
  -3  -4   2    0.60    1.20
   3  -4  -2    1.20    1.30
   3  -4  -2    1.70    1.10
  -3  -4   2    0.90    1.10
  -3  -4   2    0.40    0.80
   3  -4  -2    0.90    1.00
  -3  -4   2    0.00    0.80
   3   4  -2    1.50    0.80
  -3   4   2    4.00    1.20
   3   4  -2   -0.20    0.80
  -3   4   2    1.70    1.10
   3   4  -2    0.40    1.30
  -3   4   2    0.90    0.60
  -3   4   2    0.50    1.20
   3   4  -2    1.30    1.10
  -2  -4   2   61.69    3.20
  -2  -4   2   61.29    2.90
  -2  -4   2   64.09    3.50
   2  -4  -2   59.79    2.60
  -2  -4   2   63.99    2.80
   2  -4  -2   63.79    3.20
   2  -4  -2   65.69    3.40
   2  -4  -2   61.69    3.10
  -2   4   2   62.39    3.10
  -2   4   2   61.19    3.40
   2   4  -2   63.19    3.40
   2   4  -2   62.49    2.80
  -2   4   2   62.49    2.60
  -2   4   2   62.89    3.20
   2   4  -2   61.79    2.90
   2   4  -2   61.39    3.30
  -1  -4   2    6.80    1.00
   1  -4  -2    4.10    0.90
   1  -4  -2    3.60    1.10
   1  -4  -2    4.90    0.80
  -1  -4   2    5.50    1.00
  -1  -4   2    6.20    0.90
   1  -4  -2    5.50    1.00
  -1  -4   2    5.30    1.10
  -1   4   2    5.20    1.00
   1   4  -2    5.20    0.90
  -1   4   2    4.90    0.80
  -1   4   2    5.00    1.20
  -1   4   2    4.20    1.00
   1   4  -2    4.80    1.00
   1   4  -2    5.60    0.80
   1   4  -2    5.30    1.10
   0  -4  -2    5.40    1.10
   0  -4   2    3.30    0.80
   0  -4  -2    4.40    0.90
   0  -4   2    2.60    0.80
   0  -4   2    3.60    1.00
   0  -4  -2    4.90    0.90
   0  -4  -2    5.60    0.90
   0  -4   2    2.90    1.00
   0   4   2    4.30    0.90
   0   4   2    3.30    1.10
   0   4  -2    2.90    0.90
   0   4   2    4.40    0.90
   0   4   2    4.40    0.90
   0   4  -2    2.00    0.80
   0   4  -2    2.50    0.90
  -1  -4  -2    6.90    1.10
  -1  -4  -2    4.30    1.00
   1  -4   2    6.30    1.20
  -1  -4  -2    7.10    0.90
   1  -4   2    5.70    0.90
   1  -4   2    4.20    1.00
   1  -4   2    5.30    0.80
  -1  -4  -2    6.70    1.10
   1   4   2    6.10    1.10
  -1   4  -2    5.00    1.00
  -1   4  -2    3.80    1.00
  -1   4  -2    4.90    1.10
   1   4   2    5.90    0.80
   1   4   2    6.80    1.20
   1   4   2    4.30    1.00
  -1   4  -2    4.30    0.80
  -2  -4  -2  160.68    6.50
   2  -4   2  150.98    6.50
  -2  -4  -2  160.48    6.30
   2  -4   2  150.48    6.50
   2  -4   2  143.39    6.20
  -2  -4  -2  149.59    6.50
  -2  -4  -2  156.08    6.00
  -2   4  -2  144.89    6.50
   2   4   2  156.58    6.30
  -2   4  -2  145.19    5.70
  -2   4  -2  148.19    6.60
   2   4   2  160.48    6.10
   2   4   2  155.68    6.40
   2   4   2  153.68    6.50
  -2   4  -2  152.38    6.30
   3  -4   2   13.20    2.00
  -3  -4  -2    9.00    1.80
  -3  -4  -2   10.40    1.60
   3  -4   2   12.60    1.80
   3  -4   2    8.00    1.30
  -3  -4  -2   10.60    1.20
  -3   4  -2    8.40    1.50
   3   4   2    9.50    1.10
   3   4   2    9.20    1.50
   3   4   2    9.80    1.50
  -3   4  -2    8.20    1.40
   3   4   2    8.70    1.60
  -3   4  -2   10.00    1.60
  -4  -4  -2  372.96   13.60
   4  -4   2  385.86   14.60
   4  -4   2  344.27   14.10
   4  -4   2  362.86   14.50
  -4  -4  -2  348.07   14.50
  -4  -4  -2  375.56   14.10
  -4   4  -2  369.96   14.10
   4   4   2  363.06   14.40
   4   4   2  365.06   14.10
  -5  -4  -2    0.50    1.40
   5  -4   2    1.80    1.90
   5  -4   2    1.50    1.40
   5  -4   2    0.50    1.60
  -5  -4  -2    1.90    1.30
  -5  -4  -2    3.10    0.80
   5   4   2    2.90    1.40
  -5   4  -2    1.20    1.30
   5   4   2    2.10    1.60
  -5   4  -2    3.70    1.50
   5   4   2    2.00    0.70
   5   4   2    2.10    1.50
   5   4   2    3.90    1.40
  -6  -4  -2  609.34   22.50
  -6  -4  -2  611.04   23.80
   6  -4   2  624.04   23.20
   6  -4   2  610.84   23.80
   6  -4   2  617.34   22.40
  -6  -4  -2  624.24   23.40
   6  -4   2  590.74   23.90
   6   4   2  604.94   23.70
  -6   4  -2  614.74   23.80
  -6   4  -2  643.44   23.20
   6   4   2  623.34   22.60
   6   4   2  590.14   23.70
   6   4   2  616.24   23.80
  -7  -4  -2   -2.80    1.50
   7  -4   2    1.40    1.30
   7  -4   2    0.80    0.90
  -7  -4  -2    0.40    0.70
  -7  -4  -2    0.60    1.60
   7   4   2   -0.70    1.70
  -7   4  -2   -0.20    1.70
  -7   4  -2    0.80    1.50
   7   4   2    0.60    1.70
   7   4   2   -0.40    0.70
  -7   4  -2   -0.60    0.90
  -8  -4  -2    4.80    2.30
  -8  -4  -2    4.80    2.30
   8  -4   2    6.50    2.60
   8  -4   2    7.70    1.70
   8   4   2    7.30    2.20
  -8   4  -2    7.70    1.50
   8   4   2    7.50    2.10
  -8   4  -2    9.80    2.10
  -8   4  -2    8.40    2.30
   8   4   2    6.60    0.90
  -9  -4  -2   68.49    5.10
   9  -4   2   57.19    3.40
   9  -4   2   64.49    4.10
   9  -4   2   71.29    5.20
  -9   4  -2   62.99    3.70
  -9   4  -2   61.29    5.10
   9   4   2   69.09    4.70
   9   4   2   66.39    5.00
 -10  -4  -2   32.00    4.40
  10  -4   2   23.40    2.80
  10  -4   2   28.80    3.40
  10  -4   2   31.20    4.50
  10   4   2   35.70    3.90
 -10   4  -2   29.90    3.10
 -10   4  -2   33.60    4.60
  10   4   2   27.60    3.90
  11  -4   2    6.80    2.30
  11  -4   2    2.10    2.30
  11  -4   2    1.70    3.40
 -11  -4  -2    7.20    3.30
 -11   4  -2    4.80    2.70
 -11   4  -2   -0.90    2.80
  11   4   2    4.40    3.00
  11   4   2    2.70    2.80
  12  -4   2   11.20    3.00
 -12  -4  -2   12.00    3.90
  12  -4   2   10.50    4.10
 -12   4  -2    8.50    3.80
  12   4   2    8.20    3.30
  12   4   2   10.30    3.70
  13  -4   2   -0.80    3.20
 -13  -4  -2    1.90    4.30
 -13   4  -2   -0.50    4.00
  13   4   2    0.40    3.90
  14  -4   2    0.30    4.70
  14  -4   2   -2.00    4.20
  14   4   2   -5.90    4.30
 -14   4  -2   -3.90    4.50
  14   4   2    0.80    4.50
  15  -4   2   -8.80    6.50
 -15  -4  -2   -4.10    5.80
  15  -4   2   -0.50    4.20
 -15   4  -2    8.80    5.90
  15   4   2   -0.60    5.20
  15   4   2    7.00    5.50
 -16  -4  -2   19.50    7.80
  16  -4   2   -3.60    7.90
  16   4   2   -0.40    6.40
  16   4   2   21.20    6.70
 -16   4  -2   19.00    7.90
  16  -5  -2   -3.40    7.40
 -16  -5   2    7.50    7.70
  16   5  -2    4.60    6.10
 -16   5   2  -10.30    7.20
  16   5  -2    4.10    6.00
  15  -5  -2  -10.80    6.30
 -15  -5   2   12.40    7.40
  15  -5  -2   -3.90    5.20
  15   5  -2    4.00    4.80
 -15   5   2   17.60    6.90
  15   5  -2    2.00    5.30
  14  -5  -2   11.20    4.30
  14  -5  -2   11.60    6.10
 -14  -5   2   10.40    5.70
 -14   5   2   21.70    5.90
  14   5  -2    6.40    4.80
  14   5  -2    8.90    5.00
  13  -5  -2   15.50    6.00
 -13  -5   2    7.30    4.80
  13  -5  -2   11.60    3.70
  13   5  -2   -0.60    3.90
  13   5  -2    8.00    4.00
 -13   5   2   14.00    4.60
  12  -5  -2   30.10    5.10
  12  -5  -2   32.20    3.30
 -12  -5   2   38.40    5.40
  12  -5  -2   37.80    4.10
  12   5  -2   34.30    4.90
 -12   5   2   28.50    4.70
  12   5  -2   22.30    4.10
  11  -5  -2   21.70    3.00
  11  -5  -2   15.60    2.20
  11  -5  -2   23.60    3.00
 -11  -5   2   24.60    4.40
  11  -5  -2   21.80    4.70
 -11   5   2   15.60    3.90
  11   5  -2   21.00    3.60
  11   5  -2   15.70    3.40
  11   5  -2   15.80    2.10
 -10  -5   2    1.00    1.50
  10  -5  -2    0.10    1.70
  10  -5  -2    5.30    2.10
  10  -5  -2   -0.50    1.40
 -10  -5   2   -2.40    2.70
  10   5  -2    0.40    1.50
  10   5  -2    0.00    2.40
  10   5  -2   -0.10    2.50
 -10   5   2    3.00    2.60
   9  -5  -2   12.30    1.80
  -9  -5   2   18.20    3.40
  -9  -5   2   14.20    1.90
   9  -5  -2   15.80    2.50
   9   5  -2   16.80    2.80
   9   5  -2   14.70    1.70
   9   5  -2   13.60    3.00
  -9   5   2   16.40    3.00
   8  -5  -2   53.19    2.50
   8  -5  -2   56.39    3.90
  -8  -5   2   52.89    3.00
  -8  -5   2   50.39    4.50
   8  -5  -2   51.69    2.60
   8   5  -2   52.59    4.40
   8   5  -2   54.29    3.10
  -8   5   2   51.79    4.40
   8   5  -2   54.19    3.90
   7  -5  -2    3.70    1.60
  -7  -5   2    4.20    1.70
  -7  -5   2    1.40    1.20
   7  -5  -2    2.10    0.70
  -7  -5   2    0.90    2.00
   7  -5  -2    3.10    0.70
   7   5  -2    3.60    1.90
   7   5  -2    0.50    1.60
  -7   5   2    4.90    2.00
   7   5  -2    1.00    1.20
   6  -5  -2    0.70    1.90
  -6  -5   2   -0.30    1.60
  -6  -5   2    0.40    1.20
  -6  -5   2    0.10    1.00
   6  -5  -2    2.00    1.40
   6   5  -2    0.80    1.30
   6   5  -2   -1.40    0.90
   6   5  -2   -1.00    1.50
  -6   5   2   -0.30    1.70
  -6   5   2    2.80    1.90
  -6   5   2    0.30    1.50
   5  -5  -2   23.90    3.20
  -5  -5   2   29.90    2.00
   5  -5  -2   26.80    2.90
   5  -5  -2   27.90    2.50
  -5  -5   2   28.20    2.10
  -5  -5   2   24.40    2.70
  -5   5   2   23.40    2.90
   5   5  -2   24.70    3.10
  -5   5   2   26.00    2.90
   5   5  -2   23.90    1.90
  -5   5   2   21.50    2.60
   5   5  -2   25.90    2.10
   5   5  -2   22.60    2.80
  -4  -5   2   20.40    1.80
  -4  -5   2   20.70    2.90
   4  -5  -2   18.70    2.50
   4  -5  -2   22.80    2.30
  -4  -5   2   22.10    2.60
   4  -5  -2   19.80    2.90
  -4  -5   2   21.60    1.80
   4  -5  -2   21.70    1.00
  -4   5   2   25.30    2.30
   4   5  -2   19.00    1.70
   4   5  -2   18.80    2.60
   4   5  -2   17.60    1.80
  -4   5   2   20.30    2.70
   4   5  -2   21.40    2.70
   3  -5  -2  246.28    9.40
  -3  -5   2  248.88    9.70
   3  -5  -2  263.17   10.60
  -3  -5   2  250.37   10.50
  -3  -5   2  254.57    9.90
   3  -5  -2  255.27   10.20
   3  -5  -2  250.97   10.10
   3   5  -2  242.78    9.70
   3   5  -2  243.58   10.30
  -3   5   2  254.27   10.10
   3   5  -2  255.67    9.80
  -3   5   2  259.87    9.40
   3   5  -2  241.38   10.40
  -3   5   2  257.97   10.30
   2  -5  -2    1.30    1.00
   2  -5  -2    1.40    1.30
   2  -5  -2    0.20    0.70
  -2  -5   2    0.10    1.20
  -2  -5   2   -0.20    1.20
  -2  -5   2    1.70    1.00
   2   5  -2   -1.10    0.80
  -2   5   2    0.80    0.80
   2   5  -2    0.10    1.00
  -2   5   2    2.10    1.40
   2   5  -2   -1.50    1.30
  -2   5   2    1.50    1.20
  -2   5   2    0.20    1.10
  -1  -5   2    2.10    1.00
  -1  -5   2   -0.50    1.00
  -1  -5   2    1.90    1.00
  -1  -5   2    1.00    1.20
   1  -5  -2   -0.30    1.20
   1  -5  -2    1.60    1.00
   1  -5  -2   -0.80    0.80
   1  -5  -2    0.40    1.00
  -1   5   2    1.30    1.10
   1   5  -2    1.00    0.90
   1   5  -2   -0.60    1.10
   1   5  -2    0.60    1.10
  -1   5   2    1.00    0.90
   1   5  -2    0.70    0.90
  -1   5   2   -0.20    1.00
  -1   5   2    2.30    1.10
   0  -5  -2  234.48    9.50
   0  -5   2  242.98    9.30
   0  -5  -2  238.38    9.50
   0  -5   2  239.68    9.70
   0  -5   2  250.17    9.30
   0  -5  -2  228.68    9.30
   0  -5   2  233.68    9.40
   0  -5  -2  225.48    9.30
   0   5  -2  238.18    9.30
   0   5   2  230.58    9.50
   0   5   2  224.08    9.50
   0   5  -2  248.08    9.30
   0   5  -2  243.88    9.40
   0   5  -2  236.58    9.70
   0   5   2  230.08    9.30
   0   5   2  232.48    9.30
  -1  -5  -2  167.38    7.00
  -1  -5  -2  161.58    6.80
  -1  -5  -2  159.28    6.60
   1  -5   2  171.38    6.90
  -1  -5  -2  152.98    6.80
   1  -5   2  156.28    6.70
   1  -5   2  161.18    7.00
   1  -5   2  162.28    6.40
  -1   5  -2  161.18    6.90
   1   5   2  163.28    7.00
  -1   5  -2  163.88    6.80
   1   5   2  165.08    6.80
  -1   5  -2  170.28    7.20
   1   5   2  156.68    6.80
   1   5   2  159.68    6.60
  -1   5  -2  160.88    6.40
   2  -5   2  108.59    5.00
   2  -5   2  101.09    4.00
   2  -5   2  100.69    4.90
  -2  -5  -2  104.29    4.90
  -2  -5  -2   92.99    4.80
  -2  -5  -2  101.29    4.60
  -2  -5  -2   96.49    4.30
  -2   5  -2   95.99    4.00
   2   5   2   95.99    4.60
  -2   5  -2   97.69    5.20
   2   5   2   96.69    4.90
   2   5   2   99.59    4.80
   2   5   2   99.59    4.30
  -2   5  -2  100.39    4.80
  -2   5  -2  106.49    4.70
  -3  -5  -2   13.10    1.80
  -3  -5  -2   13.20    1.90
  -3  -5  -2   12.80    1.50
   3  -5   2    8.80    2.10
   3  -5   2    9.00    1.50
   3  -5   2    8.10    1.60
  -3  -5  -2   10.80    2.00
   3   5   2   12.10    2.00
  -3   5  -2    8.50    1.80
   3   5   2   11.80    1.40
   3   5   2   12.40    1.70
  -3   5  -2    8.50    1.50
  -3   5  -2   10.90    2.10
   4  -5   2   21.70    2.20
   4  -5   2   22.90    2.80
   4  -5   2   21.60    2.70
  -4  -5  -2   18.90    2.30
  -4  -5  -2   17.60    2.40
  -4  -5  -2   21.50    1.70
  -4   5  -2   20.40    2.50
   4   5   2   22.70    2.50
   4   5   2   17.70    2.00
   4   5   2   24.00    2.70
  -4   5  -2   22.10    2.70
   4   5   2   17.40    1.60
  -4   5  -2   22.30    2.40
   5  -5   2   12.50    2.60
   5  -5   2    7.10    2.00
  -5  -5  -2   17.50    2.30
  -5  -5  -2   14.20    2.30
  -5  -5  -2   15.60    1.40
   5  -5   2   13.40    1.80
   5   5   2   15.00    2.30
  -5   5  -2   12.10    1.90
   5   5   2   14.10    1.40
  -5   5  -2   11.80    2.10
   5   5   2   13.20    2.00
   5   5   2   15.40    2.20
  -6  -5  -2   45.90    3.40
  -6  -5  -2   52.49    3.90
   6  -5   2   42.30    4.40
  -6  -5  -2   52.19    2.50
   6  -5   2   44.60    3.20
   6   5   2   46.40    3.30
  -6   5  -2   39.80    3.30
  -6   5  -2   46.00    3.90
   6   5   2   48.00    3.70
   6   5   2   51.29    2.40
   7  -5   2   61.79    3.80
  -7  -5  -2   57.99    4.00
  -7  -5  -2   59.29    2.80
  -7  -5  -2   62.79    4.30
   7   5   2   53.29    3.30
  -7   5  -2   55.19    4.00
   7   5   2   63.19    4.00
   7   5   2   58.59    4.50
  -7   5  -2   55.79    4.40
   8  -5   2   18.00    3.20
  -8  -5  -2    5.30    2.30
  -8  -5  -2   12.40    1.30
   8  -5   2   19.10    2.40
  -8  -5  -2   11.10    2.80
   8   5   2   12.70    1.60
   8   5   2   18.30    2.90
  -8   5  -2    8.20    2.40
   8   5   2   14.60    2.70
  -9  -5  -2   12.40    3.20
   9  -5   2    9.50    3.20
   9  -5   2    8.90    1.30
   9  -5   2    9.70    2.10
   9   5   2   13.60    2.90
   9   5   2    7.40    2.60
   9   5   2    7.40    1.00
  -9   5  -2   10.30    2.90
  10  -5   2    1.60    2.90
  10  -5   2    6.50    2.40
 -10  -5  -2    0.60    2.90
 -10   5  -2    5.30    2.70
  10   5   2    3.00    2.80
  10   5   2   -0.60    2.40
 -11  -5  -2   15.90    4.00
  11  -5   2   16.10    4.60
  11  -5   2   19.10    2.90
 -11   5  -2   14.10    3.60
  11   5   2   17.50    3.90
  11   5   2   15.80    3.60
  12  -5   2    1.40    2.90
  12  -5   2    8.50    4.20
 -12  -5  -2    4.90    4.20
  12   5   2    7.50    3.60
  12   5   2    7.90    3.70
 -12   5  -2    8.20    3.90
 -13  -5  -2   -1.80    5.30
  13  -5   2    1.60    3.60
  13  -5   2    3.60    5.40
  13   5   2    1.80    4.00
  13   5   2   -1.10    3.80
 -14  -5  -2    1.70    5.40
  14  -5   2   -3.70    5.60
  14  -5   2    0.10    5.10
  14   5   2    6.20    4.80
 -14   5  -2    1.10    4.80
  14   5   2    2.50    4.70
  15  -5   2   -9.50    6.80
 -15  -5  -2    6.40    7.40
  15   5   2    4.20    5.50
 -15   5  -2   -4.20    5.60
  15   5   2   -2.50    5.40
 -16  -5  -2   -6.70    7.70
  16  -5   2    0.30    7.10
 -16   5  -2   -0.30    6.70
  16   5   2    3.90    6.60
  16   5   2    7.70    6.20
  15  -6  -2    9.60    5.30
  15  -6  -2    7.40    6.30
 -15  -6   2   -2.30    7.00
 -15   6   2    0.20    6.00
  15   6  -2    2.10    5.90
  15   6  -2    0.90    5.40
  14  -6  -2   -3.80    4.60
 -14  -6   2   -5.30    5.60
  14  -6  -2   -9.10    5.60
  14   6  -2   -1.40    5.50
  14   6  -2   -0.70    4.30
 -14   6   2    1.80    5.00
 -13  -6   2    4.30    5.10
  13  -6  -2   -3.90    3.90
  13  -6  -2    1.50    5.20
  13   6  -2   -0.20    3.80
  13   6  -2    1.30    4.40
 -13   6   2    3.00    6.10
  12  -6  -2    3.90    4.60
  12  -6  -2    0.20    2.90
 -12  -6   2   -0.30    4.50
  12   6  -2    2.70    3.30
  12   6  -2    7.00    4.20
 -11  -6   2   39.20    5.20
  11  -6  -2   25.80    5.10
  11  -6  -2   36.60    4.50
 -11  -6   2   29.40    3.10
 -11   6   2   23.20    4.20
  11   6  -2   29.90    4.60
  11   6  -2   32.50    4.10
 -10  -6   2   39.50    4.80
  10  -6  -2   35.30    4.10
 -10  -6   2   37.70    3.20
  10   6  -2   41.80    5.30
 -10   6   2   31.40    4.20
  10   6  -2   39.40    4.10
  10   6  -2   33.30    3.00
  -9  -6   2   36.90    4.60
   9  -6  -2   36.20    3.60
  -9  -6   2   33.00    3.00
  -9   6   2   29.40    4.30
   9   6  -2   26.80    2.80
   9   6  -2   36.00    3.60
   9   6  -2   39.30    4.80
  -8  -6   2    2.00    1.50
  -8  -6   2    1.50    2.00
   8  -6  -2    3.10    2.00
  -8  -6   2   -0.40    2.20
  -8   6   2    0.50    2.10
   8   6  -2    1.40    2.00
   8   6  -2   -2.40    1.40
   8   6  -2    3.60    2.30
  -7  -6   2   15.00    1.90
  -7  -6   2   13.90    2.20
   7  -6  -2   15.60    2.30
  -7  -6   2   14.30    2.80
   7   6  -2   13.20    1.80
   7   6  -2   14.20    2.80
  -7   6   2   12.50    2.80
  -7   6   2   14.00    2.60
  -6  -6   2    1.00    1.40
  -6  -6   2    0.40    1.30
   6  -6  -2    3.60    1.60
   6  -6  -2   -1.30    1.80
  -6  -6   2    0.80    1.90
   6   6  -2    0.40    1.40
  -6   6   2    2.50    1.90
  -6   6   2    1.60    2.20
   6   6  -2    0.90    1.90
   6   6  -2    1.90    1.40
   5  -6  -2   15.80    2.10
   5  -6  -2   10.40    2.20
  -5  -6   2   14.40    2.00
  -5  -6   2   15.00    1.90
  -5  -6   2   13.30    2.30
   5   6  -2   19.10    2.50
   5   6  -2   17.30    1.80
   5   6  -2   16.50    1.90
  -5   6   2   12.40    2.50
  -5   6   2   16.70    2.30
  -4  -6   2   87.39    5.10
   4  -6  -2   90.59    5.30
  -4  -6   2   91.79    4.10
   4  -6  -2   85.09    4.80
  -4  -6   2   86.29    4.20
  -4  -6   2   86.49    4.80
   4  -6  -2   86.99    4.50
   4   6  -2   80.19    5.00
   4   6  -2   83.59    4.90
  -4   6   2   96.89    5.00
  -4   6   2   84.69    4.60
   4   6  -2   89.79    4.20
  -4   6   2   87.49    5.10
   4   6  -2   87.89    4.10
   3  -6  -2   26.20    1.60
   3  -6  -2   27.00    2.40
   3  -6  -2   29.50    2.70
  -3  -6   2   28.10    3.20
   3  -6  -2   25.50    3.00
  -3  -6   2   26.20    2.60
  -3  -6   2   30.10    2.10
   3   6  -2   28.20    2.10
  -3   6   2   25.80    2.60
  -3   6   2   24.80    2.90
   3   6  -2   35.50    2.30
   3   6  -2   29.00    3.00
  -3   6   2   27.20    1.70
   3   6  -2   27.20    2.90
  -3   6   2   32.50    2.90
   2  -6  -2    3.60    1.00
  -2  -6   2    3.60    1.10
  -2  -6   2    2.60    1.60
   2  -6  -2    3.40    1.60
   2  -6  -2    2.00    1.20
   2  -6  -2    3.50    1.20
   2   6  -2    2.50    1.50
  -2   6   2    3.70    1.70
  -2   6   2    2.90    1.40
  -2   6   2    6.10    1.60
   2   6  -2    2.10    1.20
   2   6  -2    3.30    1.20
   2   6  -2    5.00    1.80
   1  -6  -2  150.28    6.70
  -1  -6   2  155.48    6.50
  -1  -6   2  148.99    6.50
   1  -6  -2  136.69    6.10
  -1  -6   2  153.38    6.20
   1  -6  -2  148.19    6.60
  -1  -6   2  162.08    6.90
   1  -6  -2  145.39    6.50
   1   6  -2  154.28    6.30
   1   6  -2  157.58    7.00
   1   6  -2  157.78    6.50
  -1   6   2  139.59    6.80
   1   6  -2  155.98    6.50
  -1   6   2  130.79    7.10
  -1   6   2  145.79    6.10
  -1   6   2  146.39    6.50
   0  -6  -2   41.20    3.20
   0  -6   2   40.50    3.10
   0  -6  -2   42.80    2.70
   0  -6   2   43.10    2.70
   0  -6  -2   46.10    3.00
   0  -6   2   40.80    2.80
   0  -6  -2   46.90    2.90
   0  -6   2   38.50    2.50
   0   6   2   45.80    2.80
   0   6   2   43.50    3.40
   0   6  -2   41.80    2.70
   0   6  -2   44.30    3.20
   0   6  -2   39.60    2.80
   0   6   2   49.99    2.80
   0   6  -2   39.10    2.70
   0   6   2   43.10    3.00
  -1  -6  -2  310.37   14.10
  -1  -6  -2  375.16   14.30
   1  -6   2  355.26   14.30
   1  -6   2  361.86   13.70
   1  -6   2  377.96   14.20
  -1  -6  -2  370.46   14.10
   1  -6   2  361.36   14.00
  -1  -6  -2  343.17   14.10
   1   6   2  362.76   14.00
  -1   6  -2  362.96   14.40
  -1   6  -2  363.36   14.10
   1   6   2  364.86   13.90
  -1   6  -2  369.36   13.70
  -1   6  -2  364.26   14.20
   1   6   2  363.76   14.20
  -2  -6  -2   19.10    1.90
   2  -6   2   15.40    1.30
  -2  -6  -2   18.40    2.70
  -2  -6  -2   20.10    2.50
   2  -6   2   15.40    1.90
   2  -6   2   14.80    1.80
  -2  -6  -2   17.30    2.10
   2  -6   2   16.50    2.20
   2   6   2   16.40    2.30
   2   6   2   16.70    2.40
  -2   6  -2   17.40    2.30
  -2   6  -2   14.20    1.30
   2   6   2   16.90    1.80
   2   6   2   12.80    1.90
  -2   6  -2   12.00    1.90
  -2   6  -2   17.30    2.00
  -3  -6  -2  129.09    6.40
   3  -6   2  131.99    6.40
  -3  -6  -2  125.29    6.20
   3  -6   2  128.89    6.30
  -3  -6  -2  134.09    5.90
   3  -6   2  137.59    6.00
  -3  -6  -2  128.49    5.60
  -3   6  -2  134.89    4.90
   3   6   2  121.99    6.10
   3   6   2  122.79    6.30
   3   6   2  128.29    5.90
  -3   6  -2  137.69    6.40
   3   6   2  128.59    5.60
  -3   6  -2  136.29    6.00
  -3   6  -2  129.89    6.40
  -4  -6  -2    1.40    1.50
  -4  -6  -2    1.60    0.90
  -4  -6  -2    2.40    1.60
   4  -6   2    2.10    1.70
   4  -6   2    1.20    2.10
   4  -6   2   -0.40    1.20
   4   6   2    0.70    1.50
  -4   6  -2    2.70    1.70
  -4   6  -2    2.00    1.60
   4   6   2    2.10    1.00
   4   6   2    1.80    1.40
   4   6   2    0.50    1.70
  -4   6  -2   -2.70    1.40
   5  -6   2   27.40    2.70
  -5  -6  -2   24.00    2.80
   5  -6   2   26.30    3.40
   5  -6   2   28.90    3.60
  -5  -6  -2   25.10    2.00
  -5  -6  -2   25.70    2.70
  -5   6  -2   29.40    3.20
  -5   6  -2   28.30    3.20
   5   6   2   30.50    2.10
   5   6   2   26.00    3.20
  -6  -6  -2   10.30    1.40
  -6  -6  -2    8.00    2.20
  -6  -6  -2   12.00    2.30
   6  -6   2   11.50    2.00
   6   6   2    8.50    2.10
   6   6   2   12.80    2.30
  -6   6  -2    8.80    2.10
   6   6   2    9.60    1.40
  -7  -6  -2   87.09    5.20
  -7  -6  -2   93.89    5.70
  -7  -6  -2   87.59    4.10
   7  -6   2   86.49    5.00
   7   6   2   99.69    5.20
   7   6   2   97.39    4.10
  -7   6  -2   81.59    5.80
   7   6   2   91.69    5.90
  -8  -6  -2    6.50    1.30
  -8  -6  -2    6.70    2.60
  -8  -6  -2    7.00    2.80
   8  -6   2    7.50    2.20
   8   6   2    6.30    2.50
  -8   6  -2    2.40    2.40
   8   6   2   10.20    2.50
   8   6   2    5.90    1.20
  -9  -6  -2    3.10    1.20
   9  -6   2    3.70    2.10
   9  -6   2    3.50    2.90
  -9  -6  -2    1.20    2.70
  -9   6  -2    2.40    2.50
   9   6   2    0.10    2.30
   9   6   2    2.30    2.30
  10  -6   2    1.60    2.30
 -10  -6  -2   -0.10    3.20
  10  -6   2    0.30    3.00
  10   6   2    1.50    2.50
  10   6   2    2.40    2.70
 -10   6  -2   -1.30    2.80
  11  -6   2    3.90    3.80
 -11  -6  -2    1.70    3.90
  11  -6   2    5.20    2.70
  11   6   2    3.10    3.20
 -11   6  -2    9.80    3.80
  11   6   2    4.50    3.10
  12  -6   2   38.50    4.80
 -12  -6  -2   44.60    6.00
  12  -6   2   42.70    8.10
  12   6   2   36.90    6.10
  12   6   2   43.60    5.90
 -12   6  -2   40.90    5.90
 -13  -6  -2    1.80    5.20
  13  -6   2   -2.60    4.30
  13  -6   2    5.90    5.30
 -13   6  -2   -3.40    4.30
  13   6   2    1.00    4.20
  13   6   2    0.40    4.00
  14  -6   2    3.70    6.50
 -14  -6  -2   10.10    6.40
  14  -6   2    3.10    4.50
  14   6   2    4.80    4.90
  14   6   2   -0.30    4.60
 -14   6  -2    1.40    5.40
 -15  -6  -2   20.00    7.90
  15  -6   2    0.00    6.80
  15   6   2   -1.90    5.50
 -15   6  -2   11.90    7.10
  15   6   2   -5.70    5.50
 -15  -7   2   32.00    9.10
  15  -7  -2   29.10    9.20
  15  -7  -2   24.70    6.50
  15   7  -2   25.60    6.00
 -15   7   2   21.10    7.50
  15   7  -2   27.60    7.50
 -14  -7   2    6.60    6.80
  14  -7  -2    9.30    6.80
 -14   7   2   -1.50    6.00
  14   7  -2    0.20    5.90
  14   7  -2   -1.50    4.50
 -13  -7   2    4.00    5.50
  13  -7  -2    2.80    5.30
  13  -7  -2    0.00    4.20
  13   7  -2    1.10    3.90
  13   7  -2    9.70    5.30
 -13   7   2    5.50    4.90
 -12  -7   2    8.70    6.10
  12  -7  -2    6.90    3.70
  12  -7  -2    4.90    4.80
 -12   7   2    3.60    4.20
  12   7  -2    7.10    3.70
  12   7  -2    9.60    4.70
 -11  -7   2   -1.30    2.30
 -11  -7   2    2.10    3.60
  11  -7  -2    2.90    3.00
  11   7  -2    1.50    3.60
 -11   7   2   -3.40    3.20
  11   7  -2   -3.10    2.80
 -10  -7   2    1.30    3.40
  10  -7  -2    3.90    2.60
  10   7  -2    0.40    2.00
  10   7  -2    0.80    2.60
 -10   7   2    3.40    2.90
  10   7  -2    5.20    3.40
  -9  -7   2  117.99    6.60
  -9  -7   2  130.99    7.60
   9  -7  -2  126.89    6.70
  -9  -7   2  117.79    6.60
   9   7  -2  124.39    6.40
  -9   7   2  126.99    7.70
   9   7  -2  109.89    5.70
   9   7  -2  117.89    7.70
  -8  -7   2   14.20    3.40
  -8  -7   2   11.60    2.00
   8  -7  -2   11.10    2.60
  -8  -7   2   11.80    2.50
   8   7  -2    8.40    2.00
  -8   7   2    8.50    2.90
   8   7  -2   13.40    2.50
   8   7  -2   11.40    3.10
  -7  -7   2    1.50    1.50
   7  -7  -2    1.40    1.90
  -7  -7   2   -0.40    2.50
  -7  -7   2    1.20    1.70
   7   7  -2   -0.20    1.60
  -7   7   2    1.50    2.60
  -7   7   2    2.90    2.20
   7   7  -2   -0.10    2.10
  -6  -7   2    0.80    2.20
   6  -7  -2    3.90    1.90
  -6  -7   2    2.50    1.70
  -6  -7   2    4.10    1.60
   6   7  -2    2.60    2.00
   6   7  -2    3.20    1.60
   6   7  -2    4.70    1.70
  -6   7   2    4.60    2.10
  -6   7   2    3.70    2.50
  -5  -7   2   33.80    3.60
  -5  -7   2   38.30    2.70
   5  -7  -2   33.00    3.10
   5  -7  -2   30.70    3.70
  -5  -7   2   40.30    2.80
  -5   7   2   38.10    3.70
   5   7  -2   37.40    3.70
   5   7  -2   38.60    2.70
   5   7  -2   41.10    2.90
  -5   7   2   33.10    3.80
   4  -7  -2   36.90    3.60
  -4  -7   2   48.70    2.90
   4  -7  -2   43.80    1.90
   4  -7  -2   43.90    3.30
  -4  -7   2   43.80    2.90
  -4  -7   2   44.30    3.60
   4   7  -2   46.30    2.80
   4   7  -2   44.90    3.10
  -4   7   2   41.80    3.90
   4   7  -2   43.30    3.70
  -4   7   2   42.50    2.00
  -4   7   2   41.80    3.60
   3  -7  -2  140.19    5.60
  -3  -7   2  131.99    6.20
   3  -7  -2  140.09    6.90
  -3  -7   2  140.09    6.00
   3  -7  -2  144.09    6.50
  -3  -7   2  157.88    7.90
   3  -7  -2  131.59    6.60
  -3  -7   2  141.39    6.70
   3   7  -2  137.39    6.90
  -3   7   2  137.89    7.00
   3   7  -2  135.69    6.20
  -3   7   2  144.89    5.70
  -3   7   2  133.19    6.70
   3   7  -2  140.29    6.70
   3   7  -2  142.69    6.10
  -2  -7   2    7.40    1.90
   2  -7  -2    8.00    1.30
  -2  -7   2    8.30    1.60
   2  -7  -2    7.50    1.70
   2  -7  -2    6.30    1.70
  -2  -7   2   12.10    1.70
   2  -7  -2   11.10    2.20
  -2  -7   2    8.50    1.80
  -2   7   2    8.90    1.80
   2   7  -2    8.40    1.90
   2   7  -2   13.10    2.20
   2   7  -2   11.50    1.70
  -2   7   2    7.50    1.80
  -2   7   2    6.10    1.30
   2   7  -2    7.80    1.60
  -2   7   2    8.50    2.10
   1  -7  -2   43.20    3.10
   1  -7  -2   40.20    2.70
  -1  -7   2   46.20    3.70
  -1  -7   2   46.40    2.90
  -1  -7   2   48.70    3.00
   1  -7  -2   44.90    3.30
   1  -7  -2   42.10    3.30
  -1   7   2   43.30    3.50
   1   7  -2   46.50    3.10
  -1   7   2   45.10    3.40
   1   7  -2   47.50    3.20
  -1   7   2   39.20    3.10
   1   7  -2   46.00    2.90
  -1   7   2   46.30    2.80
   1   7  -2   43.40    3.60
   0  -7  -2   28.00    2.90
   0  -7   2   32.40    2.60
   0  -7  -2   22.30    2.50
   0  -7   2   24.20    2.20
   0  -7   2   29.90    3.10
   0  -7   2   26.40    2.50
   0  -7  -2   25.60    2.50
   0  -7  -2   25.70    2.70
   0   7  -2   28.60    2.90
   0   7   2   27.80    3.20
   0   7   2   29.80    2.40
   0   7  -2   25.80    2.50
   0   7  -2   29.30    2.70
   0   7   2   25.80    2.60
   0   7  -2   27.20    2.40
   0   7   2   29.80    2.90
  -1  -7  -2   46.60    3.80
   1  -7   2   53.19    3.30
   1  -7   2   56.39    3.90
   1  -7   2   62.69    3.70
  -1  -7  -2   51.89    3.20
  -1  -7  -2   57.89    3.50
   1  -7   2   53.59    2.90
  -1  -7  -2   60.09    3.90
   1   7   2   56.79    3.40
   1   7   2   56.59    3.50
  -1   7  -2   50.59    3.60
  -1   7  -2   51.49    3.80
  -1   7  -2   49.40    3.40
  -1   7  -2   56.39    3.00
   1   7   2   53.79    3.80
  -2  -7  -2  109.89    5.20
  -2  -7  -2   98.49    5.80
   2  -7   2  106.89    5.30
  -2  -7  -2  105.49    5.00
  -2  -7  -2  106.49    5.50
   2  -7   2  108.49    4.60
   2  -7   2  111.19    5.50
   2  -7   2  101.19    5.60
   2   7   2  101.99    5.80
  -2   7  -2  118.19    5.60
   2   7   2  106.49    5.60
  -2   7  -2  110.49    5.70
  -2   7  -2  110.49    5.40
   2   7   2  108.59    5.10
  -2   7  -2  107.59    4.70
   2   7   2  106.39    5.40
  -3  -7  -2    2.40    1.30
  -3  -7  -2    1.70    1.60
   3  -7   2    6.00    2.10
  -3  -7  -2    3.00    1.80
   3  -7   2    4.30    1.60
  -3  -7  -2    4.20    2.00
   3  -7   2    2.10    1.60
  -3   7  -2    2.00    0.70
  -3   7  -2    2.10    1.70
  -3   7  -2    5.80    1.90
   3   7   2    2.40    1.70
   3   7   2    1.50    1.30
   3   7   2    3.20    1.90
   4  -7   2   41.10    3.30
  -4  -7  -2   43.90    3.30
  -4  -7  -2   41.60    3.60
   4  -7   2   48.70    4.20
  -4   7  -2   48.00    3.90
   4   7   2   44.70    3.80
  -4   7  -2   43.20    3.90
   4   7   2   51.29    3.00
   5  -7   2  641.04   24.40
  -5  -7  -2  634.74   23.90
  -5  -7  -2  636.74   25.00
  -5  -7  -2  641.94   24.30
   5   7   2  630.54   24.90
   5   7   2  641.34   23.90
  -5   7  -2  620.74   24.90
   5   7   2  644.54   24.40
  -6  -7  -2   79.69    4.90
  -6  -7  -2   79.49    4.10
  -6  -7  -2   88.79    5.70
   6  -7   2   94.19    5.00
  -6   7  -2   84.39    5.70
   6   7   2   86.19    4.30
   6   7   2   86.39    5.60
   6   7   2   87.59    5.00
  -7  -7  -2   34.60    2.50
  -7  -7  -2   25.80    3.70
   7  -7   2   30.20    3.40
  -7  -7  -2   30.60    4.20
   7   7   2   27.40    3.50
   7   7   2   30.40    2.50
   7   7   2   33.20    3.50
  -7   7  -2   24.70    3.30
   8  -7   2   13.60    2.60
  -8  -7  -2    9.60    3.10
  -8  -7  -2   10.40    1.70
  -8   7  -2    9.20    2.70
   8   7   2   11.90    2.70
   8   7   2    7.80    3.00
   8   7   2    7.70    1.50
   9  -7   2    7.90    2.50
  -9  -7  -2    7.50    1.50
  -9  -7  -2    0.80    2.90
   9   7   2    5.00    1.50
   9   7   2    3.30    3.00
   9   7   2    5.00    2.60
  -9   7  -2    3.30    2.90
 -10  -7  -2   -0.40    3.30
  10  -7   2    0.90    2.70
  10  -7   2   -4.70    3.50
 -10  -7  -2    0.70    1.40
 -10   7  -2   -1.60    3.00
  10   7   2   -0.90    3.00
  10   7   2    3.70    2.90
  11  -7   2   23.60    5.20
  11  -7   2   18.30    3.70
 -11  -7  -2   15.80    5.00
 -11   7  -2   13.30    4.00
  11   7   2   21.20    4.70
  11   7   2   14.70    3.60
  12  -7   2    9.10    3.90
 -12  -7  -2   11.10    5.40
  12  -7   2    8.80    4.90
  12   7   2   12.90    4.50
  12   7   2    8.00    4.10
  13  -7   2   -0.80    4.30
  13  -7   2    8.20    6.00
 -13  -7  -2   -1.30    5.60
  13   7   2    0.40    4.90
  13   7   2    3.60    4.30
 -13   7  -2   -2.60    4.90
 -14  -7  -2    3.60    7.00
  14  -7   2   10.30    7.20
  14   7   2    3.60    5.40
 -14   7  -2    1.80    5.50
  14   7   2    3.90    4.90
 -15  -7  -2   39.30   10.40
  15  -7   2   31.60   10.70
 -15   7  -2   27.70    8.10
  15   7   2   46.10    8.60
  15   7   2   41.40    6.90
  14  -8  -2    3.90    6.70
  14  -8  -2   11.90    7.50
 -14  -8   2   20.90    7.80
  14   8  -2   13.50    4.80
 -14   8   2   13.10    6.50
  14   8  -2   16.20    6.80
  13  -8  -2    1.00    5.70
 -13  -8   2   10.60    6.60
  13   8  -2    4.10    4.20
  13   8  -2    4.30    5.60
 -13   8   2    5.40    5.30
  12  -8  -2   11.30    4.30
  12  -8  -2    9.80    5.80
 -12  -8   2   13.40    5.70
 -12   8   2   12.30    5.30
  12   8  -2   10.20    4.70
  12   8  -2    8.70    3.60
 -11  -8   2    2.00    2.90
  11  -8  -2   -0.50    3.70
 -11   8   2    4.60    3.80
  11   8  -2    5.50    3.10
  10  -8  -2    8.70    3.40
 -10  -8   2    8.30    3.90
 -10  -8   2    9.30    2.30
  10   8  -2    6.70    3.70
  10   8  -2    6.90    2.90
 -10   8   2   10.70    3.70
  -9  -8   2    3.40    3.60
  -9  -8   2    3.10    1.90
  -9  -8   2   -0.30    2.80
   9  -8  -2    2.30    2.70
   9   8  -2    3.90    2.60
   9   8  -2    2.10    2.30
  -9   8   2    3.50    3.00
   9   8  -2    1.30    3.20
  -8  -8   2   26.30    2.70
  -8  -8   2   21.30    3.10
  -8  -8   2   34.40    4.50
   8  -8  -2   22.90    3.60
   8   8  -2   24.90    3.30
  -8   8   2   20.30    3.50
   8   8  -2   20.90    3.80
   8   8  -2   23.10    3.40
  -7  -8   2    3.90    1.70
   7  -8  -2    0.50    2.20
  -7  -8   2    0.70    2.70
  -7  -8   2    5.30    2.10
  -7   8   2    2.90    2.50
   7   8  -2    6.20    2.70
   7   8  -2    1.70    1.80
   7   8  -2    3.70    2.20
  -7   8   2   -1.70    2.80
  -6  -8   2   10.20    1.90
   6  -8  -2   10.00    2.40
  -6  -8   2    8.80    3.00
  -6  -8   2   13.70    2.30
   6   8  -2   10.90    2.20
  -6   8   2   10.40    2.80
  -6   8   2   12.20    3.40
   6   8  -2   10.50    2.40
   6   8  -2    8.60    2.90
   5  -8  -2   17.20    2.70
  -5  -8   2   15.00    2.80
  -5  -8   2   15.90    2.10
  -5  -8   2   17.50    2.30
  -5   8   2   18.80    3.30
   5   8  -2   18.60    2.30
  -5   8   2   11.50    2.50
   5   8  -2   14.30    2.90
   5   8  -2   20.00    2.40
   4  -8  -2  446.26   16.90
  -4  -8   2  464.85   18.60
  -4  -8   2  461.45   17.60
  -4  -8   2  476.35   17.90
   4  -8  -2  455.25   18.20
   4   8  -2  471.75   17.80
   4   8  -2  441.86   17.80
  -4   8   2  456.05   18.50
   4   8  -2  465.25   18.80
  -4   8   2  453.15   17.00
  -4   8   2  462.55   18.90
  -3  -8   2    1.50    1.80
  -3  -8   2    0.20    1.40
   3  -8  -2   -0.50    1.80
   3  -8  -2    0.20    1.00
   3  -8  -2    1.50    1.60
  -3  -8   2    1.00    1.30
   3   8  -2    1.00    1.60
   3   8  -2   -0.60    1.40
  -3   8   2    3.20    2.20
  -3   8   2    1.20    1.10
   3   8  -2    0.30    1.80
   3   8  -2    2.20    2.60
  -3   8   2    0.60    1.70
   2  -8  -2    0.90    1.20
   2  -8  -2   -0.20    1.60
  -2  -8   2    0.10    1.40
   2  -8  -2    2.00    1.60
   2  -8  -2    1.30    1.90
  -2  -8   2    2.10    1.70
  -2  -8   2   -0.60    1.40
   2   8  -2    1.60    1.80
  -2   8   2    2.60    1.40
   2   8  -2    1.50    1.40
  -2   8   2    0.40    1.60
  -2   8   2   -0.30    1.80
   2   8  -2    2.00    2.00
   2   8  -2    1.80    1.80
  -1  -8   2    1.70    1.60
   1  -8  -2    2.00    1.70
  -1  -8   2    1.50    1.40
  -1  -8   2   -0.40    1.40
   1  -8  -2    0.90    1.30
   1  -8  -2    2.80    1.80
   1  -8  -2    1.90    2.00
   1   8  -2    0.60    1.80
   1   8  -2    0.60    1.80
  -1   8   2    0.20    1.60
   1   8  -2    0.20    1.50
  -1   8   2    1.90    1.70
  -1   8   2    3.70    1.50
   0  -8  -2   19.40    2.50
   0  -8  -2   19.40    2.50
   0  -8   2   17.10    2.30
   0  -8   2   22.70    2.50
   0  -8   2   21.30    2.70
   0  -8  -2   21.70    2.80
   0   8   2   25.70    2.60
   0   8   2   18.30    2.70
   0   8  -2   23.00    2.90
   0   8   2   25.30    3.00
   0   8  -2   21.20    2.40
  -1  -8  -2    2.00    1.40
  -1  -8  -2    2.50    1.70
  -1  -8  -2    4.00    1.80
   1  -8   2    2.60    1.20
   1  -8   2    1.80    1.50
   1  -8   2    0.80    1.70
  -1  -8  -2    2.50    1.70
  -1   8  -2   -0.40    1.60
   1   8   2    1.00    1.60
  -1   8  -2   -0.80    1.70
   1   8   2    2.90    1.80
   1   8   2    1.40    1.60
  -1   8  -2    2.30    1.40
   1   8   2   -1.10    1.50
  -2  -8  -2   11.20    2.20
  -2  -8  -2    8.70    2.20
  -2  -8  -2   10.90    1.80
   2  -8   2   10.10    1.40
   2  -8   2   11.90    2.40
   2  -8   2    7.90    1.90
   2   8   2   12.60    1.90
  -2   8  -2   10.00    2.40
  -2   8  -2    9.80    1.30
   2   8   2   10.00    2.20
   2   8   2    7.40    2.20
   2   8   2   11.90    2.30
  -2   8  -2    5.30    2.00
   3  -8   2    4.50    2.30
  -3  -8  -2    3.80    1.90
  -3  -8  -2    4.30    2.00
   3  -8   2    4.90    1.80
  -3  -8  -2   -0.40    1.30
  -3   8  -2    2.00    1.00
  -3   8  -2    4.20    2.00
   3   8   2    3.00    1.90
   3   8   2    3.30    1.60
   3   8   2    3.20    1.90
  -3   8  -2   -0.50    1.80
  -4  -8  -2  130.69    6.50
  -4  -8  -2  137.69    7.10
   4  -8   2  144.09    6.70
  -4  -8  -2  138.99    6.20
   4   8   2  135.19    6.60
   4   8   2  136.89    7.30
  -4   8  -2  130.29    7.20
   4   8   2  131.39    6.20
  -4   8  -2  138.09    7.30
  -5  -8  -2  170.88    7.40
  -5  -8  -2  172.68    8.60
  -5  -8  -2  170.48    7.90
   5  -8   2  184.98    8.10
   5   8   2  173.08    8.00
   5   8   2  165.08    8.60
   5   8   2  169.18    7.50
  -5   8  -2  168.58    8.70
  -6  -8  -2   84.79    5.10
  -6  -8  -2   82.79    5.80
   6  -8   2   83.99    5.30
  -6  -8  -2   87.79    4.40
   6   8   2   77.59    4.40
   6   8   2   85.79    5.10
   6   8   2   83.59    6.00
  -6   8  -2   85.29    6.00
  -7  -8  -2   -0.80    2.80
  -7  -8  -2   -2.20    2.50
   7  -8   2    1.90    2.20
   7   8   2    0.70    2.30
   7   8   2    5.00    2.70
   7   8   2   -1.50    1.70
  -7   8  -2    0.20    2.80
  -8  -8  -2    6.00    2.00
  -8  -8  -2    6.80    3.50
   8  -8   2    6.80    2.60
   8   8   2    6.00    3.10
   8   8   2    6.90    2.70
   8   8   2    4.70    1.80
  -8   8  -2    5.80    3.10
  -9  -8  -2    0.70    1.60
  -9  -8  -2    5.50    3.60
   9  -8   2    0.40    2.80
  -9   8  -2    2.90    3.20
   9   8   2   -1.20    3.00
   9   8   2    2.50    1.90
   9   8   2    1.20    2.70
  10  -8   2   -0.50    4.10
 -10  -8  -2    3.30    1.80
  10  -8   2    3.20    2.80
 -10  -8  -2    0.80    3.70
  10   8   2    3.70    3.10
  10   8   2   -1.70    3.40
 -10   8  -2    0.70    3.30
  11  -8   2   -1.30    3.40
 -11  -8  -2   -3.90    4.80
 -11   8  -2    3.80    4.00
  11   8   2    7.60    3.50
  12  -8   2    7.60    5.30
 -12  -8  -2    1.00    4.80
  12  -8   2    5.40    4.20
  12   8   2    9.60    5.10
  12   8   2    5.10    4.00
 -12   8  -2    5.00    4.80
  13  -8   2    2.20    6.60
 -13  -8  -2   -1.60    5.90
 -13   8  -2    6.80    5.60
  13   8   2    8.20    5.20
  13   8   2   -1.60    4.30
 -14  -8  -2   15.40    7.80
  14  -8   2   -2.30    6.80
  14  -8   2    7.30    7.70
 -14   8  -2    2.60    6.20
  14   8   2   -0.90    5.00
  14   8   2    3.20    5.90
 -14  -9   2    7.80    8.30
  14  -9  -2   -0.10    7.70
  14  -9  -2    4.60    7.80
  14   9  -2    7.30    6.50
 -14   9   2   -0.80    7.10
 -13  -9   2   23.30    7.50
  13  -9  -2    2.00    7.50
  13  -9  -2    5.00    5.80
 -13   9   2   -1.50    5.50
  13   9  -2    7.40    6.40
  12  -9  -2   -1.60    6.40
  12  -9  -2    5.60    6.20
 -12  -9   2    4.40    5.70
  12   9  -2    0.40    3.70
  12   9  -2    3.80    4.60
 -12   9   2    5.50    4.60
  11  -9  -2    0.90    4.10
 -11  -9   2    8.70    5.30
 -11  -9   2    2.50    3.20
  11   9  -2    0.00    4.20
  11   9  -2    4.10    3.30
 -11   9   2    3.10    4.10
  10  -9  -2   -1.20    3.90
 -10  -9   2    4.30    2.30
 -10  -9   2   13.20    6.80
 -10   9   2    2.10    3.80
  10   9  -2    7.10    4.40
  10   9  -2    9.20    3.20
  -9  -9   2   13.00    4.40
  -9  -9   2   13.00    2.50
   9  -9  -2    6.00    3.50
  -9   9   2    4.80    3.50
   9   9  -2   15.70    3.20
   9   9  -2    8.60    3.90
  -8  -9   2   20.40    3.90
  -8  -9   2   20.50    2.60
   8  -9  -2   22.10    4.10
  -8  -9   2   22.90    4.40
   8   9  -2   26.30    3.70
   8   9  -2   19.40    4.20
  -8   9   2   18.30    3.80
  -7  -9   2    3.60    2.40
  -7  -9   2    2.20    1.80
   7  -9  -2    5.30    2.70
  -7  -9   2    4.10    3.10
   7   9  -2    3.70    2.30
   7   9  -2    0.30    2.80
  -7   9   2   -0.90    2.60
  -7   9   2    7.00    3.60
  -6  -9   2   25.00    2.80
  -6  -9   2   21.60    2.80
   6  -9  -2   20.80    3.30
  -6  -9   2   24.50    3.90
   6   9  -2   23.00    3.80
  -6   9   2   25.80    4.60
  -6   9   2   22.40    3.50
   6   9  -2   24.80    4.50
  -5  -9   2    4.30    1.80
  -5  -9   2    7.00    2.70
   5  -9  -2    5.50    2.40
  -5  -9   2    2.70    2.10
  -5   9   2    4.30    2.50
  -5   9   2    3.90    3.10
   5   9  -2    1.80    2.50
  -4  -9   2   42.80    4.10
  -4  -9   2   39.10    3.20
   4  -9  -2   37.30    2.10
  -4  -9   2   40.10    3.20
   4  -9  -2   44.50    3.90
   4   9  -2   37.50    4.50
  -4   9   2   33.30    4.30
  -4   9   2   37.70    4.50
  -4   9   2   35.60    2.30
   4   9  -2   39.00    3.60
  -3  -9   2    2.60    1.60
  -3  -9   2    2.70    2.10
   3  -9  -2    2.20    1.20
  -3  -9   2   -3.50    1.80
   3  -9  -2    1.10    1.90
   3   9  -2    0.40    2.20
  -3   9   2    1.00    2.40
  -3   9   2    0.00    1.40
  -3   9   2    2.30    2.10
   3   9  -2   -0.90    2.00
   2  -9  -2  125.09    5.50
  -2  -9   2  122.69    5.80
   2  -9  -2  115.99    6.20
  -2  -9   2  118.99    5.90
  -2  -9   2  113.89    6.10
   2   9  -2  123.09    6.90
   2   9  -2  117.39    6.90
  -2   9   2  116.49    6.80
  -2   9   2  124.99    5.50
  -2   9   2  111.69    6.60
  -1  -9   2   22.60    2.90
  -1  -9   2   22.10    3.00
   1  -9  -2   28.50    4.00
   1  -9  -2   23.40    3.00
  -1  -9   2   24.30    2.90
   1   9  -2   18.10    2.70
   1   9  -2   32.30    3.40
   1   9  -2   21.70    3.00
  -1   9   2   29.00    2.80
  -1   9   2   24.80    3.40
  -1   9   2   24.60    3.60
   0  -9  -2   -0.50    1.50
   0  -9   2    2.50    1.90
   0  -9   2   -1.40    1.50
   0  -9  -2    4.30    2.20
   0  -9   2    1.20    1.70
   0  -9  -2   -2.00    1.70
   0   9  -2   -0.30    2.00
   0   9  -2   -0.50    1.90
   0   9   2   -0.80    1.80
   0   9  -2    3.00    1.90
   0   9   2    2.60    2.10
   0   9   2    5.00    2.00
   1  -9   2    9.60    2.00
  -1  -9  -2    6.30    2.10
  -1  -9  -2    9.70    2.40
   1  -9   2    7.30    1.70
   1  -9   2    6.60    2.30
  -1  -9  -2    5.10    1.80
  -1   9  -2    5.10    2.30
  -1   9  -2    5.20    2.20
   1   9   2    5.90    2.30
  -1   9  -2    8.50    1.90
   1   9   2    9.00    2.30
   1   9   2   10.10    2.40
   2  -9   2   42.70    4.00
  -2  -9  -2   42.40    3.80
  -2  -9  -2   39.80    3.80
   2  -9   2   41.20    2.60
   2  -9   2   48.40    3.70
  -2  -9  -2   40.70    3.40
   2   9   2   38.80    3.80
  -2   9  -2   39.00    4.30
  -2   9  -2   46.60    2.80
   2   9   2   37.90    4.30
  -2   9  -2   39.60    4.00
  -3  -9  -2   30.10    3.50
  -3  -9  -2   29.40    3.80
   3  -9   2   41.40    3.60
  -3  -9  -2   33.60    3.10
   3   9   2   26.20    3.40
  -3   9  -2   38.50    4.00
   3   9   2   29.60    3.60
  -3   9  -2   38.40    4.40
  -4  -9  -2    1.90    2.30
   4  -9   2    0.10    1.90
  -4  -9  -2    0.30    2.40
  -4  -9  -2    0.10    1.50
  -4   9  -2    2.10    2.50
   4   9   2    1.30    2.20
   4   9   2   -0.70    1.90
  -4   9  -2   -0.90    2.30
   4   9   2   -1.60    2.30
  -5  -9  -2    5.10    2.80
  -5  -9  -2    2.70    1.70
  -5  -9  -2    4.10    2.60
   5  -9   2    8.30    2.40
   5   9   2   11.60    2.60
   5   9   2   -2.00    2.00
  -5   9  -2    7.20    2.90
   5   9   2    1.10    2.50
  -5   9  -2    3.20    2.60
  -6  -9  -2   38.20    4.50
  -6  -9  -2   31.00    4.20
  -6  -9  -2   39.30    3.20
   6  -9   2   46.90    4.20
   6   9   2   39.20    3.70
  -6   9  -2   40.60    4.90
   6   9   2   42.30    4.10
   6   9   2   38.70    5.10
  -7  -9  -2   18.10    4.00
  -7  -9  -2   14.50    2.20
   7  -9   2   16.80    3.10
   7   9   2   18.60    3.30
  -7   9  -2   11.10    3.20
   7   9   2   12.80    2.50
   7   9   2    9.90    3.20
   8  -9   2    2.10    2.90
  -8  -9  -2    1.20    1.80
  -8  -9  -2    5.60    3.60
   8   9   2   -0.40    2.30
  -8   9  -2    3.00    3.10
   8   9   2    6.80    2.80
   8   9   2    1.60    3.40
   9  -9   2    3.60    3.40
  -9  -9  -2    8.50    4.30
   9   9   2    8.30    3.30
  -9   9  -2    8.50    3.70
   9   9   2    7.10    3.70
 -10  -9  -2    3.30    7.90
  10  -9   2    2.00    3.40
 -10  -9  -2    2.40    2.70
  10  -9   2    5.50    4.80
 -10   9  -2   -3.50    3.70
  10   9   2    3.60    5.30
  10   9   2    6.80    3.40
  11  -9   2    7.70    6.00
 -11  -9  -2    4.50    4.70
  11  -9   2    3.30    4.10
  11   9   2    4.30    3.70
 -11   9  -2   -2.30    4.50
  11   9   2   -3.40    4.30
 -12  -9  -2   33.10    7.20
  12  -9   2   16.30    6.90
  12  -9   2   25.20    5.90
  12   9   2   26.70    5.00
  12   9   2   24.60    6.40
 -12   9  -2   30.50    6.30
  13  -9   2   15.50    7.80
 -13  -9  -2   13.90    7.40
 -13   9  -2   22.70    6.90
  13   9   2   12.80    5.10
  13   9   2    4.50    5.50
 -14  -9  -2   10.00    8.40
  14  -9   2    6.10    9.70
  14  -9   2   -2.20    6.50
 -14   9  -2   -8.80    6.50
  14   9   2   17.80    5.80
  14   9   2    1.40    6.50
  13 -10  -2    5.00    8.40
 -13 -10   2    7.40    8.00
  13 -10  -2   -6.80    5.70
  13  10  -2   -2.40    6.50
 -13  10   2   -4.10    6.20
 -12 -10   2   49.40    8.60
  12 -10  -2   15.30    5.90
  12 -10  -2   31.40    8.10
 -12  10   2   22.80    6.00
  12  10  -2   24.00    5.90
  11 -10  -2   22.90    5.70
 -11 -10   2   19.00    6.40
 -11  10   2   11.10    4.90
  11  10  -2   11.10    5.10
  11  10  -2   22.30    4.10
 -10 -10   2   -0.60    2.50
 -10 -10   2    4.30    4.70
  10 -10  -2    9.20    6.20
  10  10  -2   -1.40    4.40
 -10  10   2    1.90    4.20
  10  10  -2    4.50    3.20
  -9 -10   2    7.60    2.60
  -9 -10   2   15.50    5.20
   9 -10  -2    8.60    4.30
   9  10  -2   16.20    3.40
   9  10  -2    4.20    5.80
  -9  10   2    4.40    3.90
   8 -10  -2   -1.50    3.40
  -8 -10   2    2.00    2.10
  -8 -10   2    0.50    3.60
   8  10  -2    5.70    2.60
  -8  10   2    5.00    3.60
   8  10  -2    3.40    3.60
   7 -10  -2    1.60    3.10
  -7 -10   2    2.60    3.00
  -7 -10   2    0.70    1.90
  -7  10   2    1.50    4.20
   7  10  -2   -1.60    2.30
  -7  10   2    0.70    3.20
   7  10  -2   -5.20    3.20
  -6 -10   2    2.90    1.90
   6 -10  -2    3.90    2.90
  -6 -10   2    0.40    2.40
  -6 -10   2    1.20    3.20
  -6  10   2    4.40    2.90
   6  10  -2    1.70    2.30
   6  10  -2   -1.30    2.80
  -6  10   2   -2.20    3.40
   5 -10  -2   29.90    4.00
  -5 -10   2   30.10    3.60
  -5 -10   2   30.80    3.40
  -5 -10   2   35.50    4.40
  -5  10   2   33.70    4.20
   5  10  -2   34.70    4.90
  -5  10   2   33.40    4.90
   5  10  -2   31.50    3.70
  -4 -10   2    0.00    1.70
  -4 -10   2   -1.50    2.10
   4 -10  -2    0.60    1.10
   4 -10  -2   -1.20    2.40
  -4 -10   2    5.00    2.50
  -4  10   2   -0.30    2.90
   4  10  -2   -0.10    2.70
  -4  10   2    0.10    1.80
   4  10  -2    1.10    2.10
  -4  10   2    4.10    2.60
   3 -10  -2   37.50    4.00
  -3 -10   2   37.90    3.50
  -3 -10   2   37.30    3.50
  -3 -10   2   32.90    4.00
   3 -10  -2   39.20    2.80
   3  10  -2   45.80    5.00
  -3  10   2   33.00    4.40
  -3  10   2   35.00    3.00
  -3  10   2   39.00    4.80
   3  10  -2   39.30    3.70
  -2 -10   2    6.70    2.20
  -2 -10   2    8.30    2.40
  -2 -10   2    5.40    2.20
   2 -10  -2    9.10    2.00
   2 -10  -2    4.60    2.30
   2  10  -2    4.00    2.20
  -2  10   2    7.40    2.90
  -2  10   2    5.40    2.10
  -2  10   2    0.80    2.40
   2  10  -2    5.20    2.50
   1 -10  -2   76.09    5.10
  -1 -10   2   70.29    4.80
   1 -10  -2   81.29    4.70
  -1 -10   2   66.79    4.60
  -1 -10   2   68.59    4.80
   1  10  -2   62.49    4.90
  -1  10   2   83.29    5.50
   1  10  -2   71.79    4.80
   1  10  -2   74.89    5.50
  -1  10   2   89.19    4.70
  -1  10   2   74.19    5.60
   0 -10  -2   33.10    3.50
   0 -10   2   28.80    3.50
   0 -10   2   32.60    3.70
   0 -10   2   32.00    3.20
   0 -10  -2   37.10    3.60
   0  10  -2   30.50    3.80
   0  10   2   34.80    3.70
   0  10  -2   36.00    4.50
   0  10   2   28.50    4.10
   0  10  -2   35.80    3.70
   0  10   2   32.70    3.90
   1 -10   2  446.86   17.80
  -1 -10  -2  419.66   17.60
  -1 -10  -2  443.26   17.80
   1 -10   2  425.36   17.70
   1 -10   2  433.36   18.40
   1  10   2  440.86   18.30
  -1  10  -2  444.56   18.50
  -1  10  -2  460.65   17.20
  -1  10  -2  432.16   17.90
   1  10   2  454.35   18.10
  -2 -10  -2   88.69    5.80
   2 -10   2   82.19    5.10
  -2 -10  -2   80.39    5.30
   2 -10   2   74.49    4.10
  -2 -10  -2   79.79    4.90
  -2  10  -2   67.59    5.30
  -2  10  -2   80.99    4.30
   2  10   2   73.89    5.20
  -2  10  -2   75.49    6.00
   2  10   2   80.59    5.90
  -3 -10  -2   70.99    4.40
  -3 -10  -2   66.39    5.20
   3 -10   2   61.69    4.70
  -3 -10  -2   62.79    4.70
   3  10   2   65.59    5.50
  -3  10  -2   66.99    3.50
   3  10   2   69.39    5.00
  -3  10  -2   54.19    5.50
  -3  10  -2   64.99    5.30
  -4 -10  -2   16.90    3.40
   4 -10   2   14.20    2.70
  -4 -10  -2   17.00    2.50
  -4 -10  -2   13.30    3.10
   4  10   2   20.40    3.20
   4  10   2   19.50    3.30
  -4  10  -2   13.40    3.60
  -4  10  -2   11.90    3.10
   5 -10   2   61.59    5.30
  -5 -10  -2   51.79    3.90
  -5 -10  -2   42.80    5.00
   5  10   2   49.50    5.70
   5  10   2   58.39    4.80
  -5  10  -2   55.59    5.70
  -6 -10  -2   20.50    3.90
   6 -10   2   20.20    3.40
  -6 -10  -2   20.20    2.60
   6  10   2   22.10    4.20
  -6  10  -2   18.30    3.80
   6  10   2   25.40    3.60
   7 -10   2    7.20    3.10
  -7 -10  -2    7.70    3.70
  -7 -10  -2    8.00    2.20
  -7  10  -2    6.90    3.60
   7  10   2    9.10    3.10
   7  10   2    7.70    3.90
   8 -10   2    3.50    3.70
  -8 -10  -2    7.30    4.30
  -8 -10  -2    1.90    2.10
   8  10   2   10.50    3.20
  -8  10  -2   10.20    4.00
   8  10   2    4.80    3.80
   9 -10   2   15.80    4.50
  -9 -10  -2   19.50    2.70
  -9  10  -2   20.80    4.50
   9  10   2   22.20    5.00
   9  10   2   25.00    4.30
 -10 -10  -2   32.70    6.60
  10 -10   2   41.70    7.00
  10  10   2   31.00    5.60
 -10  10  -2   26.50    6.90
  10  10   2   39.60    5.40
  11 -10   2   26.80    7.40
  11 -10   2   19.10    5.70
 -11 -10  -2   36.60    7.10
  11  10   2   43.00    6.80
  11  10   2   43.20    6.20
 -11  10  -2   21.60    5.70
 -12 -10  -2    9.00    6.20
  12 -10   2    6.10    8.00
  12 -10   2   -2.90    5.10
 -12  10  -2   -3.10    5.10
  12  10   2    0.20    5.90
  12  10   2   13.40    4.90
  13 -10   2   -5.40    5.20
  13 -10   2   12.50    9.50
 -13 -10  -2    5.50    8.20
 -13  10  -2   -0.90    5.90
  13  10   2    7.30    6.30
  12 -11  -2    3.60    6.40
 -12 -11   2   13.60    8.10
  12 -11  -2   23.40    8.70
 -12  11   2    9.20    5.90
  12  11  -2    7.70    6.50
 -11 -11   2   20.30    7.00
  11 -11  -2    0.20    6.80
 -11  11   2    6.00    5.10
  11  11  -2   11.70    5.90
  10 -11  -2   -0.90    4.40
 -10 -11   2    3.10    5.40
 -10 -11   2    8.90    4.10
  10  11  -2    1.60    5.10
 -10  11   2    5.10    5.10
  -9 -11   2    6.40    5.10
   9 -11  -2    2.70    4.40
  -9 -11   2    1.60    2.70
   9  11  -2    8.50    3.30
   9  11  -2    9.60    4.90
  -9  11   2    0.70    4.30
  -8 -11   2   -1.10    5.10
  -8 -11   2    3.20    2.40
  -8  11   2   -6.50    3.70
   8  11  -2    2.90    3.10
  -7 -11   2    2.00    4.00
   7 -11  -2    3.80    3.70
  -7 -11   2    4.10    2.30
   7  11  -2    9.70    4.00
   7  11  -2    5.50    2.90
  -7  11   2    4.50    4.70
  -7  11   2    2.00    3.40
  -6 -11   2   -3.50    3.10
   6 -11  -2   -3.80    3.10
  -6 -11   2   -4.60    2.00
  -6  11   2    1.50    3.20
   6  11  -2    2.90    2.60
  -6  11   2    0.40    4.10
   6  11  -2    2.20    3.40
  -5 -11   2    9.60    2.50
   5 -11  -2   13.30    3.50
  -5 -11   2   19.60    4.00
  -5  11   2   14.40    4.20
   5  11  -2   22.90    4.30
  -5  11   2   16.30    3.70
   5  11  -2   19.10    3.20
   4 -11  -2   16.30    3.30
  -4 -11   2   11.20    2.50
  -4 -11   2   18.10    3.00
  -4 -11   2   11.50    3.30
   4 -11  -2   13.70    1.80
  -4  11   2   16.30    3.60
   4  11  -2   18.70    3.20
  -4  11   2   20.70    4.40
   4  11  -2   13.90    3.60
  -3 -11   2    4.80    2.60
  -3 -11   2    7.70    2.40
   3 -11  -2    6.80    2.90
   3 -11  -2    5.90    1.80
  -3 -11   2    6.50    2.90
  -3  11   2    5.60    3.40
   3  11  -2    5.90    3.00
  -3  11   2    4.90    3.00
  -3  11   2    3.80    2.10
   3  11  -2    5.40    2.50
   2 -11  -2    5.10    2.40
   2 -11  -2    3.20    2.70
  -2 -11   2    4.20    2.30
  -2 -11   2    3.90    2.40
  -2 -11   2    5.30    2.60
  -2  11   2    4.00    3.10
   2  11  -2    7.70    2.60
   2  11  -2    3.20    2.60
  -2  11   2    6.40    2.90
  -2  11   2    3.50    2.40
  -1 -11   2    3.40    2.30
  -1 -11   2    6.30    2.60
   1 -11  -2    2.90    2.20
   1 -11  -2    5.40    2.50
  -1 -11   2    5.50    2.40
   1  11  -2    0.60    2.70
  -1  11   2    2.90    2.90
  -1  11   2    3.80    2.70
  -1  11   2    2.70    2.80
   1  11  -2    5.20    2.60
   0 -11   2   35.80    4.20
   0 -11  -2   31.30    4.00
   0 -11  -2   27.20    3.50
   0 -11   2   35.60    3.70
   0  11   2   38.70    4.80
   0  11  -2   35.90    5.20
   0  11  -2   41.20    4.40
   0  11  -2   40.50    4.20
   0  11   2   35.60    4.50
  -1 -11  -2   57.39    4.80
   1 -11   2   57.29    4.80
  -1 -11  -2   53.19    4.60
   1 -11   2   57.59    4.10
   1  11   2   67.39    5.70
  -1  11  -2   57.09    4.40
  -1  11  -2   64.09    5.80
  -1  11  -2   53.89    5.20
   1  11   2   59.49    5.10
   2 -11   2   31.70    4.00
   2 -11   2   27.10    3.20
  -2 -11  -2   29.50    3.70
  -2 -11  -2   35.50    4.20
  -2  11  -2   24.20    3.90
  -2  11  -2   29.30    4.30
   2  11   2   26.20    3.80
  -2  11  -2   32.80    3.30
   2  11   2   23.80    3.80
  -3 -11  -2   20.10    2.90
  -3 -11  -2   30.30    4.20
   3 -11   2   24.40    3.50
  -3  11  -2   25.60    4.30
   3  11   2   29.30    3.90
  -3  11  -2   27.50    4.30
  -3  11  -2   20.50    2.70
   3  11   2   26.20    4.00
  -4 -11  -2    0.10    1.90
   4 -11   2    1.40    2.60
  -4 -11  -2    2.30    3.20
   4  11   2    4.30    2.70
  -4  11  -2    6.30    3.20
  -4  11  -2    1.10    3.20
   4  11   2    2.50    3.10
  -5 -11  -2   13.60    2.50
  -5 -11  -2   13.10    4.00
   5 -11   2   11.50    3.30
   5  11   2   17.10    3.40
  -5  11  -2   10.80    3.80
   5  11   2   13.30    3.60
   6 -11   2    4.30    3.20
  -6 -11  -2    4.10    3.70
  -6 -11  -2   -2.80    2.00
  -6  11  -2    0.10    3.40
   6  11   2   -0.10    3.50
   6  11   2    0.10    3.00
   7 -11   2    0.10    3.50
  -7 -11  -2    7.00    2.40
  -7 -11  -2    1.40    4.10
   7  11   2   -0.30    3.80
   7  11   2    7.70    3.50
  -7  11  -2    3.10    3.80
  -8 -11  -2    2.50    2.50
  -8  11  -2    0.70    4.00
   8  11   2   -1.30    3.20
  -9 -11  -2   -8.90    4.80
  -9 -11  -2   -1.10    2.50
   9 -11   2   -2.60    4.40
   9  11   2    5.10    3.80
   9  11   2   -4.90    4.70
  -9  11  -2   -0.40    4.80
  10 -11   2    5.50    6.40
  10 -11   2    7.60    4.60
 -10 -11  -2   -3.90    5.70
 -10  11  -2   -3.10    5.00
  10  11   2   12.70    4.50
  10  11   2    0.70    4.80
  11 -11   2   -0.90    7.30
 -11 -11  -2   10.40    7.30
  11 -11   2   -1.50    5.60
  11  11   2    5.20    6.00
  11  11   2   17.30    5.00
 -11  11  -2    3.10    5.50
  12 -11   2    8.90    6.40
 -12 -11  -2    6.80    7.90
  12 -11   2    7.20    9.30
  12  11   2    5.40    6.80
 -12  11  -2    1.80    6.00
 -11 -12   2    7.60    7.80
  11 -12  -2   -7.00    5.80
 -11  12   2    0.70    6.10
  11  12  -2    6.00    7.10
  10 -12  -2    1.20    5.70
 -10 -12   2   -1.10    6.30
 -10  12   2   15.70    6.20
  10  12  -2    7.90    6.10
  -9 -12   2    3.20    3.20
   9 -12  -2    3.00    5.10
  -9 -12   2    3.10    5.70
   9  12  -2    1.30    5.50
  -9  12   2    6.50    5.10
   8 -12  -2   16.50    5.40
  -8 -12   2   10.40    6.00
  -8 -12   2   12.70    3.20
  -8  12   2    5.10    5.00
   8  12  -2   14.60    5.40
   7 -12  -2    0.10    4.00
  -7 -12   2    0.90    2.60
   7  12  -2    7.00    3.20
   7  12  -2   -1.30    4.00
  -7  12   2   -1.30    4.20
  -6 -12   2    3.60    4.30
  -6 -12   2   -2.60    2.30
   6 -12  -2    3.80    5.50
  -6  12   2    0.90    4.70
  -6  12   2   -2.20    3.80
   6  12  -2   -0.80    4.10
   6  12  -2    8.70    3.10
  -5 -12   2   18.10    3.10
   5 -12  -2   15.60    4.00
  -5 -12   2   19.80    4.80
   5  12  -2   20.80    3.50
  -5  12   2   13.50    3.90
   5  12  -2   14.90    4.30
  -5  12   2   18.70    5.10
  -4 -12   2   20.90    3.20
  -4 -12   2   24.60    4.30
   4 -12  -2   19.60    4.10
  -4  12   2   24.70    4.20
  -4  12   2   19.10    4.90
   4  12  -2   20.10    3.40
   4  12  -2   24.50    4.90
   3 -12  -2   33.70    3.40
  -3 -12   2   38.90    5.00
  -3 -12   2   39.20    4.30
   3 -12  -2   47.50    5.30
  -3  12   2   34.40    4.60
   3  12  -2   37.40    4.70
  -3  12   2   37.60    5.60
   3  12  -2   37.10    4.90
   2 -12  -2   19.50    2.80
  -2 -12   2   13.30    2.90
  -2 -12   2   20.10    3.60
   2 -12  -2    9.80    3.20
  -2  12   2   20.20    4.30
  -2  12   2   17.50    3.90
   2  12  -2   18.60    4.10
   2  12  -2   15.60    3.60
   1 -12  -2    9.10    2.90
   1 -12  -2   12.20    3.00
  -1 -12   2    8.70    2.80
  -1 -12   2   12.30    3.00
   1  12  -2   10.70    3.50
   1  12  -2    6.70    3.20
  -1  12   2   13.70    3.70
  -1  12   2   12.00    3.50
   0 -12   2   39.90    5.20
   0 -12   2   57.29    4.60
   0 -12  -2   53.39    4.80
   0 -12  -2   53.59    4.90
   0  12   2   52.09    5.70
   0  12  -2   59.69    5.30
   0  12  -2   60.69    6.30
   0  12   2   51.59    5.90
   1 -12   2   14.30    2.70
  -1 -12  -2   16.00    3.20
   1 -12   2   23.70    3.80
  -1 -12  -2   16.30    3.50
  -1  12  -2   13.80    3.60
   1  12   2   13.50    3.70
   1  12   2   16.80    3.60
  -1  12  -2   12.90    3.60
   2 -12   2    5.40    2.80
   2 -12   2    7.70    3.20
  -2 -12  -2    9.20    3.50
  -2 -12  -2    9.30    2.80
  -2  12  -2    7.70    3.50
  -2  12  -2    5.50    3.30
   2  12   2    4.90    3.20
   2  12   2    7.70    3.40
  -3 -12  -2   94.19    6.70
  -3 -12  -2   88.59    5.80
   3 -12   2   82.19    6.50
  -3  12  -2   85.69    6.80
   3  12   2   93.39    7.20
  -3  12  -2   79.79    7.40
   3  12   2   98.29    6.60
  -4 -12  -2   51.09    5.80
   4 -12   2   45.90    5.50
  -4 -12  -2   40.10    4.40
  -4  12  -2   37.80    5.40
   4  12   2   49.00    5.90
  -4  12  -2   39.30    5.50
   4  12   2   40.40    5.20
   5 -12   2    3.40    3.50
  -5 -12  -2    2.20    3.90
  -5 -12  -2    0.50    2.40
  -5  12  -2   -3.80    3.70
   5  12   2   -2.20    3.70
   5  12   2    1.50    3.40
  -6 -12  -2   12.70    4.80
  -6 -12  -2    7.80    2.70
   6 -12   2   10.50    5.20
  -6  12  -2    1.30    4.00
   6  12   2   14.10    3.70
   6  12   2    3.20    4.10
  -7 -12  -2   35.50    3.80
  -7 -12  -2   36.80   10.20
   7 -12   2   37.40    5.40
   7  12   2   45.70    5.80
   7  12   2   33.90    6.80
  -8 -12  -2    4.50    2.90
  -8 -12  -2    8.60    5.30
   8 -12   2   -3.00    4.30
   8  12   2    2.10    3.80
  -8  12  -2    7.00    4.70
   8  12   2   -4.80    4.80
  -9 -12  -2   10.70    6.10
   9 -12   2   -0.60    4.60
  -9  12  -2    1.20    5.30
   9  12   2    6.70    5.80
   9  12   2    8.60    4.30
  10 -12   2   -2.10    5.60
 -10 -12  -2   18.60    7.30
  10 -12   2   12.50    8.30
  10  12   2   -2.70    5.90
 -10  12  -2    3.70    5.70
 -11 -12  -2    2.10    7.30
  11 -12   2    3.20    8.70
  11 -12   2   -5.40    6.20
  11  12   2   -7.80    6.70
 -11  12  -2    9.00    6.70
 -10 -13   2   -1.40    7.30
  10 -13  -2    5.50    5.90
  10  13  -2   -3.80    6.60
 -10  13   2   -1.60    6.40
   9 -13  -2   -0.20    6.10
  -9 -13   2    9.20    6.80
   9  13  -2   -0.60    5.90
  -9  13   2   -2.20    5.90
   8 -13  -2    1.30    5.70
  -8 -13   2    2.50    8.40
  -8 -13   2    2.60    3.20
  -8  13   2   -1.40    5.10
   8  13  -2   -8.30    5.20
  -7 -13   2    5.40    5.10
   7 -13  -2    6.90    5.10
  -7 -13   2   -1.60    3.10
   7  13  -2    4.50    5.20
  -7  13   2   -1.30    4.70
   6 -13  -2   34.90    5.60
  -6 -13   2   31.90    4.10
  -6  13   2   32.60    5.80
   6  13  -2   33.30    6.00
   6  13  -2   36.60    5.60
   5 -13  -2    4.30    4.30
  -5 -13   2    2.60    4.00
  -5 -13   2   -0.10    2.90
   5  13  -2    4.90    4.40
   5  13  -2   -0.70    3.20
  -5  13   2    1.00    4.20
  -5  13   2    9.60    5.20
  -4 -13   2   -0.80    3.70
   4 -13  -2   -1.10    3.80
  -4 -13   2    1.90    2.80
  -4  13   2    3.60    4.60
   4  13  -2    4.30    3.40
  -4  13   2    2.70    4.00
  -3 -13   2    8.00    3.70
  -3 -13   2   -0.40    2.70
  -3  13   2    6.30    4.40
  -3  13   2    0.50    3.70
   3  13  -2    5.60    3.60
   3  13  -2    2.20    3.80
  -2 -13   2   11.10    3.60
   2 -13  -2   13.00    2.90
   2 -13  -2    8.20    3.70
  -2 -13   2    8.00    3.10
  -2  13   2   11.20    4.60
  -2  13   2    7.60    3.80
   2  13  -2    2.60    3.90
   2  13  -2    7.40    3.60
   1 -13  -2    6.90    3.50
   1 -13  -2    6.80    2.90
  -1 -13   2    2.40    3.10
  -1 -13   2    1.30    2.90
  -1  13   2   12.30    4.30
   1  13  -2    4.70    4.10
   1  13  -2    6.50    3.80
  -1  13   2    1.10    3.60
   0 -13  -2    9.20    3.10
   0 -13  -2    8.90    3.40
   0 -13   2   11.70    3.40
   0  13   2    1.20    3.60
   0  13  -2   13.50    4.10
   0  13  -2    4.10    3.90
   0  13   2    4.80    4.00
  -1 -13  -2   20.80    3.80
   1 -13   2   15.20    3.20
  -1 -13  -2   20.70    3.80
   1 -13   2   16.50    3.80
   1  13   2   21.90    4.40
   1  13   2   20.40    4.50
  -1  13  -2   13.10    4.50
  -1  13  -2   19.10    4.30
  -2 -13  -2   17.30    3.50
   2 -13   2   17.80    4.30
  -2 -13  -2   16.10    4.00
   2  13   2   10.50    4.00
  -2  13  -2    8.90    4.20
   2  13   2   18.20    4.30
  -2  13  -2   12.80    4.40
  -3 -13  -2   10.60    3.90
  -3 -13  -2    4.20    2.80
   3  13   2    4.30    3.90
  -3  13  -2    5.80    3.90
  -3  13  -2    2.60    4.30
   3  13   2    9.30    4.00
  -4 -13  -2   38.00    4.30
   4 -13   2   32.60    5.10
  -4 -13  -2   36.80    5.30
  -4  13  -2   31.80    5.10
   4  13   2   41.80    5.20
   4  13   2   35.10    5.30
  -5 -13  -2    6.60    4.50
  -5 -13  -2   -1.30    2.80
   5 -13   2    9.90    4.40
   5  13   2    3.10    3.90
   6 -13   2   -0.70    4.60
  -6 -13  -2   -2.70    2.80
  -6 -13  -2    2.60    5.10
  -6  13  -2   -7.00    4.40
   6  13   2   -8.20    4.70
   6  13   2   -2.10    3.90
  -7 -13  -2   -2.10    3.00
  -7 -13  -2   -1.40    5.30
   7 -13   2    0.90    4.90
   7  13   2   -1.90    4.90
   7  13   2   -1.70    4.10
  -7  13  -2   -1.20    4.70
  -8 -13  -2    3.60    6.20
   8 -13   2   -5.20    4.80
  -8 -13  -2    4.80    3.70
   8  13   2   -1.10    5.40
  -8  13  -2   -1.10    5.30
  -9 -13  -2   -2.30    6.80
   9 -13   2    2.50    6.00
  -9  13  -2    0.20    5.90
   9  13   2    8.90    6.30
  10 -13   2   24.80    9.20
 -10 -13  -2    7.60    8.60
  10 -13   2   -1.70    6.90
 -10  13  -2    9.50    6.70
  10  13   2   -8.00    6.80
  -8 -14   2   16.70    7.50
   8 -14  -2   11.20    5.80
  -8 -14   2   11.70    4.10
   8  14  -2   24.40    7.40
  -8  14   2    7.40    6.60
   7 -14  -2   -8.60    5.30
  -7 -14   2    0.10    3.70
  -7 -14   2    2.70    6.40
  -7  14   2    5.00    5.80
   7  14  -2    0.60    5.90
  -6 -14   2   -3.70    3.30
  -6 -14   2    3.40    5.40
   6 -14  -2   -2.70    5.30
  -6  14   2    6.60    6.70
   6  14  -2   14.60    5.80
  -6  14   2    7.30    5.10
   5 -14  -2   10.90    5.20
  -5 -14   2   19.40    6.80
  -5 -14   2   16.90    4.10
  -5  14   2   22.00    6.80
  -5  14   2   12.30    5.40
   5  14  -2   10.10    5.80
  -4 -14   2    9.50    5.60
   4 -14  -2    3.30    4.40
  -4 -14   2    8.00    3.50
   4  14  -2   10.00    5.00
  -4  14   2    3.40    5.70
   4  14  -2    0.80    4.70
  -4  14   2   10.40    6.10
   3 -14  -2    2.90    4.30
  -3 -14   2   10.40    4.70
  -3 -14   2    8.20    4.20
   3  14  -2    4.80    4.40
  -3  14   2   10.90    5.60
   3  14  -2   11.90    4.30
  -3  14   2    4.90    6.10
   2 -14  -2    4.20    3.20
   2 -14  -2   -0.70    3.50
  -2 -14   2    4.00    3.90
   2  14  -2    6.20    4.60
  -2  14   2   -0.10    4.40
   2  14  -2    5.70    4.30
  -2  14   2    4.40    5.00
  -1 -14   2    0.50    3.40
  -1 -14   2    0.30    3.20
   1 -14  -2    3.20    3.90
   1 -14  -2    3.90    3.30
  -1  14   2   -7.50    4.00
   1  14  -2    2.80    4.10
  -1  14   2    5.00    4.60
   1  14  -2   -0.90    4.10
   0 -14   2    5.60    3.40
   0 -14   2    5.20    3.80
   0 -14  -2    0.60    4.00
   0 -14  -2    8.30    3.70
   0  14   2    5.20    4.70
   0  14  -2    0.10    4.10
   0  14  -2    5.20    4.50
   0  14   2    5.90    4.60
  -1 -14  -2   11.10    4.40
   1 -14   2    6.60    3.30
   1 -14   2    3.20    3.70
  -1  14  -2    5.40    4.50
   1  14   2    9.00    5.00
  -1  14  -2   11.80    4.90
   1  14   2    2.20    6.80
   2 -14   2   -3.30    4.00
  -2 -14  -2    5.50    4.10
  -2 -14  -2    2.90    3.40
  -2  14  -2   -4.80    4.40
  -2  14  -2    1.50    4.60
   2  14   2    7.70    4.60
  -3 -14  -2   13.90    3.90
   3 -14   2    4.00    4.00
  -3 -14  -2   14.20    5.00
   3  14   2    9.70    4.70
   3  14   2   22.10    4.70
  -3  14  -2    8.00    5.60
  -3  14  -2    5.30    5.00
  -4 -14  -2   -0.40    4.50
   4 -14   2   -0.40    4.40
  -4 -14  -2   -0.90    3.40
  -4  14  -2    1.10    4.70
   4  14   2    6.10    4.40
   4  14   2   -2.50    4.60
  -5 -14  -2    9.50    3.70
  -5 -14  -2   18.10    5.80
   5 -14   2   13.40    5.20
   5  14   2   21.90    5.60
  -5  14  -2   20.50    5.90
   5  14   2   16.40    4.80
  -6 -14  -2    0.60    5.50
   6 -14   2    2.00    5.10
  -6 -14  -2    4.90    3.70
   6  14   2   10.80    5.20
  -6  14  -2   -4.10    5.10
   6  14   2   13.00    5.70
  -7 -14  -2    3.30    3.70
   7 -14   2    6.60    6.10
  -7 -14  -2   13.10    6.80
  -7  14  -2    0.10    5.60
   7  14   2   13.90    6.70
  -8 -14  -2   14.80    7.20
   8 -14   2   21.20    7.40
   8  14   2    4.80    6.80
  -8  14  -2    1.80    6.30
  -6 -15   2    0.50    6.30
  -6 -15   2    0.80    4.00
   6 -15  -2    5.00    6.30
   6  15  -2    2.60    6.30
  -6  15   2  -10.60    6.10
  -5 -15   2    1.80    7.10
   5 -15  -2    5.20    6.20
  -5 -15   2   -6.20    4.00
   5  15  -2   -5.00    5.60
  -5  15   2   11.50    6.10
  -5  15   2   -4.60    6.70
  -4 -15   2   -8.00    3.80
   4 -15  -2   -3.60    5.30
  -4 -15   2   -1.50    5.70
  -4  15   2    2.10    5.30
  -4  15   2    3.70    6.50
   4  15  -2   -4.70    5.20
  -3 -15   2   -5.40    4.90
  -3 -15   2   -2.20    3.70
   3 -15  -2    0.80    4.30
   3  15  -2   -6.00    5.10
  -3  15   2   -2.90    5.00
   2 -15  -2    9.80    5.10
  -2 -15   2    1.70    4.70
  -2 -15   2    3.00    4.20
  -2  15   2    1.30    5.80
  -2  15   2    0.30    5.10
   2  15  -2    0.40    5.40
   1 -15  -2   -0.20    4.60
  -1 -15   2   -4.00    3.50
  -1 -15   2    4.30    4.30
   1  15  -2   -0.20    5.10
   1  15  -2    3.40    5.10
  -1  15   2   -8.20    4.70
  -1  15   2   -2.80    5.50
   0 -15   2   -5.40    4.00
   0 -15   2   -2.70    4.10
   0 -15  -2    2.30    4.10
   0 -15  -2    1.70    4.20
   0  15  -2   -2.10    5.10
   0  15  -2    7.70    5.20
   0  15   2    1.80    4.90
   0  15   2   -1.90    5.40
   1 -15   2   31.10    5.50
  -1 -15  -2   32.80    6.90
  -1 -15  -2   19.50    4.60
  -1  15  -2   33.30    6.40
   1  15   2   23.30    5.90
  -1  15  -2   12.90    5.50
   1  15   2   16.70    6.00
  -2 -15  -2   19.20    5.40
  -2 -15  -2    3.00    3.90
   2 -15   2   -8.70    4.40
   2  15   2    8.00    5.50
  -2  15  -2    8.60    5.60
   2  15   2   -0.70    5.00
  -2  15  -2    2.20    5.60
  -3 -15  -2   -9.80    3.50
   3 -15   2   -0.50    4.50
  -3 -15  -2    9.80    5.60
   3  15   2    3.50    5.40
  -3  15  -2    2.40    5.50
   3  15   2   -9.10    4.90
  -4 -15  -2   -4.70    3.70
  -4 -15  -2    6.50    5.80
   4 -15   2   -7.60    4.30
  -4  15  -2   -0.60    5.50
   4  15   2    4.10    5.60
  -5 -15  -2   20.80    7.30
   5 -15   2   12.30    5.40
  -5 -15  -2   17.30    4.80
  -5  15  -2   15.20    6.20
   5  15   2   18.10    6.70
   6 -15   2    3.30    6.20
  -6 -15  -2    3.40    4.40
  -6 -15  -2   10.70    7.90
  -6  15  -2    8.00    6.40
   6  15   2    1.30    6.20
  -3 -16   2    1.20    6.00
  -3 -16   2   -5.70    4.60
   3 -16  -2    8.40    6.80
  -3  16   2    4.90    6.90
  -3  16   2   -1.10    6.50
   3  16  -2   -6.90    5.90
  -2 -16   2    4.40    5.20
   2 -16  -2   -7.30    5.10
  -2 -16   2   -4.60    4.50
  -2  16   2   -9.70    6.00
  -2  16   2    3.80    7.60
   2  16  -2   -2.30    6.30
  -1 -16   2   -1.60    4.70
   1 -16  -2   -3.80    5.20
   1  16  -2   -3.00    6.30
  -1  16   2   -2.30    6.00
   0 -16   2   11.90    5.40
   0 -16  -2    0.60    4.90
   0  16   2    7.60    6.10
   0  16  -2   -3.50    6.00
   0  16   2    9.10    6.80
  -1 -16  -2    1.70    4.50
   1 -16   2   -0.50    5.40
   1  16   2    2.30    5.90
   1  16   2   -3.90    6.50
   2 -16   2  -13.70    5.00
  -2 -16  -2   -1.90    4.40
   2  16   2  -11.10    6.10
  -2  16  -2  -13.90    6.00
  -3 -16  -2   29.10    7.40
   3 -16   2   19.50    6.40
  -3 -16  -2   24.90    5.70
   3  16   2   21.80    6.80
  -3  16  -2   27.40    7.20
  17   0  -3    3.40    7.10
 -16   0   3    4.30    6.70
  16   0  -3   15.00    6.40
 -15   0   3   10.70    5.50
  15   0  -3    4.30    6.40
 -14   0   3    3.40    4.20
  14   0  -3    7.60    4.40
  14   0  -3   -3.20    2.70
  13   0  -3    0.90    3.60
  13   0  -3   -0.90    2.30
 -13   0   3    0.70    3.40
  12   0  -3   -1.20    3.20
 -12   0   3    0.70    3.00
  12   0  -3    0.10    2.00
  12   0  -3    0.80    2.30
 -11   0   3    1.40    2.50
  11   0  -3    2.50    2.00
  11   0  -3   -1.30    2.60
  11   0  -3   -0.20    1.60
 -10   0   3    4.80    2.30
  10   0  -3    1.60    2.20
  10   0  -3    2.90    1.60
 -10   0   3    2.60    2.00
  10   0  -3    4.90    1.80
   9   0  -3   -0.70    1.70
   9   0  -3    2.30    1.40
  -9   0   3    1.60    1.80
  -9   0   3   -1.00    1.80
   9   0  -3    2.90    2.20
   9   0  -3    1.60    2.00
  -8   0   3    0.50    1.60
   8   0  -3   -2.10    2.20
   8   0  -3    1.70    1.90
   8   0  -3    0.40    1.10
   8   0  -3    2.60    1.70
  -8   0   3    1.00    1.60
   8   0  -3    0.30    1.20
   8   0  -3    2.10    1.80
   7   0  -3   -0.10    1.00
   7   0  -3   -2.40    1.30
   7   0  -3   -1.10    1.40
   7   0  -3   -0.40    1.80
   7   0  -3    0.50    1.50
  -7   0   3   -0.10    1.30
   6   0  -3   -0.30    1.40
   6   0  -3    0.10    1.30
   6   0  -3   -0.40    1.30
  -6   0   3    0.70    1.20
   6   0  -3    0.50    0.90
   5   0  -3   -0.90    1.00
   5   0  -3   -0.30    1.10
  -5   0   3    0.40    1.00
  -5   0   3   -0.80    0.90
   5   0  -3   -1.40    0.90
   5   0  -3   -0.20    0.80
   4   0  -3    0.50    0.80
   4   0  -3   -0.10    0.60
   4   0  -3    0.40    0.90
  -4   0   3   -0.30    0.70
   4   0  -3    0.80    1.00
  -4   0   3    0.30    0.60
  -4   0   3    0.70    0.90
   3   0  -3    0.70    0.70
   3   0  -3   -0.40    0.50
  -3   0   3    0.20    0.60
  -3   0   3   -0.70    0.50
   3   0  -3    0.20    0.70
  -3   0   3    0.20    0.60
  -3   0   3   -0.10    0.60
  -2   0   3    0.00    0.40
  -2   0   3   -0.30    0.50
  -2   0   3    0.60    0.60
   2   0  -3   -0.30    0.50
   2   0  -3   -0.50    0.50
   2   0  -3   -0.50    0.40
   2   0  -3    0.20    0.50
   1   0  -3    0.40    0.30
   1   0  -3    0.20    0.20
   1   0  -3    0.20    0.40
   1   0  -3   -0.30    0.30
  -1   0   3    0.70    0.30
   0   0   3    3.60    2.40
   0   0  -3    5.40    2.20
   0   0  -3    5.70    3.10
   1   0   3    0.40    0.40
   1   0   3    0.50    0.20
  -1   0  -3    0.30    0.20
  -1   0  -3    0.20    0.40
   1   0   3    1.00    0.40
  -1   0  -3   -0.10    0.40
   1   0   3    0.40    0.40
  -1   0  -3    0.30    0.40
   2   0   3   -0.30    0.60
   2   0   3   -0.30    0.60
  -2   0  -3    0.00    0.70
  -2   0  -3    0.30    0.30
  -2   0  -3   -0.60    0.50
   2   0   3   -0.10    0.60
  -2   0  -3    0.40    0.60
   3   0   3   -0.40    0.70
   3   0   3    0.30    0.30
  -3   0  -3   -1.00    0.60
  -3   0  -3   -1.40    0.70
  -3   0  -3    0.60    0.30
   3   0   3   -0.10    0.80
  -3   0  -3   -0.10    0.70
   3   0   3    0.10    0.80
   4   0   3   -0.10    0.80
  -4   0  -3   -0.10    1.00
   4   0   3    0.00    0.40
  -4   0  -3   -0.70    0.80
   4   0   3    0.70    1.00
  -4   0  -3   -1.30    0.80
   4   0   3    0.30    0.90
   5   0   3    0.70    1.30
   5   0   3   -1.90    1.00
  -5   0  -3   -1.40    1.20
   5   0   3    0.20    0.50
   5   0   3    0.70    1.30
  -5   0  -3   -0.10    1.40
  -5   0  -3   -1.00    1.00
   6   0   3   -0.40    0.70
   6   0   3   -0.70    0.60
   6   0   3    0.00    1.50
   6   0   3    0.30    1.30
  -6   0  -3    0.20    1.20
  -6   0  -3   -0.90    1.30
   6   0   3   -1.00    1.20
  -7   0  -3   -0.90    1.60
   7   0   3    2.40    1.60
   7   0   3    0.90    1.40
   7   0   3   -1.50    0.60
   7   0   3    2.80    1.70
   8   0   3    4.80    2.00
   8   0   3   -0.10    1.70
  -8   0  -3    2.40    1.70
   8   0   3   -0.10    0.80
   8   0   3    0.50    0.90
  -8   0  -3   -0.90    1.60
  -9   0  -3    0.10    1.80
   9   0   3    6.10    2.30
   9   0   3    1.40    1.00
   9   0   3   -1.50    1.00
  -9   0  -3   -1.20    1.60
   9   0   3    1.80    2.00
  10   0   3    0.40    1.30
  10   0   3    3.20    2.50
 -10   0  -3    1.10    2.20
  10   0   3    0.40    1.10
 -10   0  -3   -1.60    2.00
 -11   0  -3    2.20    2.50
 -11   0  -3    3.90    2.60
  11   0   3    2.20    2.80
  11   0   3    0.90    1.30
  11   0   3    0.50    1.40
 -12   0  -3    1.00    3.00
  12   0   3    1.80    1.70
  12   0   3   -1.60    1.40
  12   0   3    0.00    3.20
 -12   0  -3    3.70    3.00
 -13   0  -3    2.30    3.60
 -13   0  -3   -4.10    3.30
  13   0   3   -3.10    3.90
  13   0   3   -2.60    2.00
  14   0   3    5.30    6.70
 -14   0  -3    6.30    4.50
  15   0   3   -2.70    5.60
 -15   0  -3   -0.10    5.30
  16   0   3   -3.70    6.50
 -16   0  -3    3.20    6.50
  17  -1  -3   -0.40    7.10
  17   1  -3  -10.60    6.40
  16  -1  -3   -5.40    6.00
  16   1  -3  -11.40    5.60
  15  -1  -3   -3.60    5.50
 -15  -1   3   -2.90    5.10
  15  -1  -3    1.40    3.50
 -15   1   3   10.00    5.50
  15   1  -3   -0.50    6.20
 -14  -1   3    2.90    4.60
  14  -1  -3    1.30    4.60
  14  -1  -3   -0.40    3.30
 -14   1   3    9.00    4.60
  14   1  -3    3.50    4.40
  14   1  -3    6.40    3.00
  13  -1  -3    6.70    2.70
 -13  -1   3    4.40    3.80
  13  -1  -3   11.20    4.20
  13   1  -3    5.70    2.50
  13   1  -3    5.50    3.70
 -13   1   3    5.30    3.80
 -13   1   3    9.00    3.90
  12  -1  -3    1.00    3.30
 -12  -1   3    3.70    3.10
  12  -1  -3   -1.50    2.60
  12  -1  -3    1.40    2.10
  12   1  -3    1.70    2.00
  12   1  -3   -0.70    2.00
  12   1  -3    0.40    3.00
 -12   1   3    0.20    3.00
 -12   1   3    2.40    3.20
 -11  -1   3    5.00    2.70
  11  -1  -3    5.60    1.80
  11  -1  -3    7.50    3.10
  11  -1  -3    4.90    2.40
  11   1  -3    7.70    2.00
 -11   1   3    2.80    2.70
 -11   1   3    4.30    2.60
  11   1  -3    3.70    1.80
  11   1  -3    0.10    2.80
  10  -1  -3   17.40    2.90
  10  -1  -3   13.50    3.00
 -10  -1   3   12.00    2.80
  10  -1  -3    9.70    2.10
  10  -1  -3   10.10    2.00
 -10   1   3   12.90    2.80
  10   1  -3   14.20    3.00
  10   1  -3   12.10    2.00
 -10   1   3   14.80    2.60
  10   1  -3   12.40    2.80
   9  -1  -3    2.10    1.40
   9  -1  -3    3.30    2.10
   9  -1  -3    3.30    2.10
  -9  -1   3   -1.30    1.90
   9  -1  -3   -0.20    1.60
   9   1  -3   -1.50    2.40
   9   1  -3    2.70    2.50
   9   1  -3    2.90    2.10
  -9   1   3   -2.00    1.80
   9   1  -3   -1.80    1.30
  -9   1   3   -0.10    1.80
  -8  -1   3  205.28    9.10
   8  -1  -3  212.58    8.80
   8  -1  -3  188.98    9.20
   8  -1  -3  216.78    8.60
   8  -1  -3  216.28    9.30
   8  -1  -3  201.08    9.40
   8   1  -3  202.78    9.20
  -8   1   3  208.58    9.30
   8   1  -3  221.08   10.90
   8   1  -3  198.28    8.20
   8   1  -3  206.98    9.00
   8   1  -3  199.28    9.10
  -7  -1   3  169.48    7.60
   7  -1  -3  170.28    7.90
   7  -1  -3  170.08    7.10
   7  -1  -3  173.28    7.80
   7  -1  -3  182.98    7.40
   7  -1  -3  178.68    7.10
   7   1  -3  155.38    7.90
  -7   1   3  174.08    7.40
   7   1  -3  171.28    7.70
   7   1  -3  166.28    7.80
   7   1  -3  171.28    6.90
  -7   1   3  167.58    7.80
   7   1  -3  173.78    7.60
   6  -1  -3   28.60    2.70
  -6  -1   3   30.50    2.60
   6  -1  -3   30.60    2.90
   6  -1  -3   31.50    2.40
   6  -1  -3   27.50    2.20
  -6  -1   3   32.50    2.00
   6  -1  -3   27.30    2.10
   6   1  -3   34.60    2.70
   6   1  -3   31.90    2.90
   6   1  -3   36.80    2.00
   6   1  -3   32.70    2.50
  -6   1   3   28.30    2.20
   6   1  -3   31.00    2.60
   5  -1  -3   14.70    2.00
   5  -1  -3   12.50    1.60
   5  -1  -3   13.70    1.50
   5  -1  -3   12.50    1.60
   5  -1  -3   13.20    1.50
  -5  -1   3   12.30    1.70
  -5  -1   3   11.70    1.30
   5   1  -3   13.30    1.80
   5   1  -3   11.90    1.70
   5   1  -3   12.70    1.40
   5   1  -3   12.20    1.60
  -5   1   3   11.80    1.60
  -5   1   3   13.50    1.60
   5   1  -3   12.50    1.70
   4  -1  -3  222.18    8.60
   4  -1  -3  210.98    8.70
  -4  -1   3  209.88    8.60
  -4  -1   3  212.78    8.20
   4  -1  -3  220.38    8.40
   4   1  -3  223.18    8.70
   4   1  -3  223.78    8.70
   4   1  -3  214.38    8.40
  -4   1   3  205.68    8.40
  -4   1   3  215.28    8.60
  -4   1   3  209.48    8.70
   4   1  -3  218.88    8.50
   3  -1  -3  184.68    6.90
  -3  -1   3  165.38    7.10
   3  -1  -3  194.38    7.00
   3  -1  -3  176.78    7.30
   3  -1  -3  191.18    7.30
  -3  -1   3  168.08    6.80
   3   1  -3  173.28    6.90
   3   1  -3  170.88    6.90
  -3   1   3  189.58    7.10
   3   1  -3  176.68    7.20
   3   1  -3  175.68    6.80
  -3   1   3  185.08    7.20
   2  -1  -3   19.00    1.20
  -2  -1   3   24.20    1.50
   2  -1  -3   20.30    1.30
   2  -1  -3   19.20    1.40
   2   1  -3   22.20    1.40
  -2   1   3   18.90    1.30
  -2   1   3   18.40    1.40
   2   1  -3   22.60    1.40
   2   1  -3   23.20    1.10
   1  -1  -3    8.10    0.90
   1  -1  -3   10.50    0.60
  -1  -1   3   10.50    0.90
   1  -1  -3    9.80    0.80
  -1  -1   3   10.60    0.90
  -1  -1   3    9.70    0.80
  -1   1   3    9.20    0.60
   1   1  -3    9.20    0.80
   1   1  -3   10.20    0.90
  -1   1   3    9.00    0.80
   1   1  -3    9.50    0.80
   0  -1   3  361.06   13.50
   0  -1  -3  362.16   13.60
   0  -1  -3  369.06   13.60
   0  -1  -3  358.06   13.40
   0  -1   3  373.06   13.50
   0  -1   3  371.96   13.60
   0   1  -3  379.56   13.60
   0   1  -3  377.76   13.60
   0   1   3  360.46   13.60
   0   1   3  369.36   13.50
   0   1  -3  380.36   13.50
   0   1   3  353.66   13.60
   0   1  -3  366.36   13.50
   1  -1   3   44.70    2.00
   1  -1   3   46.00    1.90
   1  -1   3   48.70    2.20
   1  -1   3   48.40    1.90
  -1  -1  -3   44.50    2.10
  -1  -1  -3   40.80    2.00
  -1  -1  -3   42.70    1.80
  -1   1  -3   48.40    1.90
  -1   1  -3   47.30    2.10
   1   1   3   42.60    2.10
  -1   1  -3   45.40    1.90
   1   1   3   44.10    2.00
   1   1   3   41.90    2.00
  -1   1  -3   50.69    2.20
  -2  -1  -3  888.31   31.60
  -2  -1  -3  870.01   31.60
   2  -1   3  851.01   31.60
   2  -1   3  848.32   31.30
  -2  -1  -3  881.71   31.60
   2  -1   3  863.51   31.30
  -2   1  -3  817.12   31.80
   2   1   3  795.42   31.70
  -2   1  -3  853.01   31.30
   2   1   3  908.41   31.60
  -2   1  -3  873.91   31.60
   2   1   3  853.31   31.60
  -2   1  -3  871.31   31.40
  -3  -1  -3  903.91   33.60
   3  -1   3  880.51   33.20
  -3  -1  -3  955.40   33.60
  -3  -1  -3  890.41   33.60
   3  -1   3  938.11   33.70
   3  -1   3  906.31   33.30
   3  -1   3  864.91   33.60
   3   1   3  903.41   33.60
   3   1   3  948.81   33.60
   3   1   3  979.50   33.70
  -3   1  -3  903.61   33.70
  -3   1  -3  873.61   33.30
  -3   1  -3  895.11   33.20
  -4  -1  -3  144.69    6.30
  -4  -1  -3  143.29    6.20
   4  -1   3  159.78    6.40
  -4  -1  -3  139.09    6.20
   4  -1   3  151.08    5.70
   4  -1   3  151.88    6.30
  -4   1  -3  151.18    6.40
   4   1   3  138.59    6.10
  -4   1  -3  153.78    5.90
   4   1   3  142.59    6.30
  -4   1  -3  155.88    5.80
   4   1   3  138.99    6.10
   5  -1   3   -0.30    0.90
  -5  -1  -3    1.30    1.20
   5  -1   3    0.80    1.30
  -5  -1  -3    1.10    1.10
   5  -1   3    1.10    0.70
   5  -1   3    1.20    1.10
  -5  -1  -3    0.40    1.30
   5   1   3    1.30    1.30
  -5   1  -3    1.70    0.80
   5   1   3    2.90    1.30
  -5   1  -3    1.10    1.00
   5   1   3    4.10    1.40
  -5   1  -3    2.30    1.50
   5   1   3    3.00    0.50
   6  -1   3   19.40    2.50
  -6  -1  -3   10.00    1.70
   6  -1   3   13.50    1.80
  -6  -1  -3   17.30    2.40
   6  -1   3   11.30    1.70
   6  -1   3   17.00    1.40
  -6  -1  -3   18.90    2.50
   6   1   3   16.40    2.20
   6   1   3   16.00    2.10
   6   1   3   15.30    1.00
  -6   1  -3   20.90    2.60
   6   1   3   19.50    2.30
  -6   1  -3   14.40    1.90
   6   1   3   16.60    1.00
   7  -1   3    2.60    1.60
  -7  -1  -3    1.60    1.50
   7  -1   3    2.40    1.40
  -7  -1  -3    1.70    1.40
   7  -1   3    4.10    0.90
   7  -1   3    3.90    1.50
  -7  -1  -3    4.70    2.00
   7   1   3    1.60    1.50
   7   1   3    2.60    1.70
   7   1   3    3.20    0.70
   7   1   3    3.20    0.60
  -7   1  -3    3.20    1.40
   7   1   3    3.90    1.80
  -7   1  -3    3.10    1.50
  -8  -1  -3   32.40    3.10
   8  -1   3   30.10    3.30
   8  -1   3   33.00    2.20
  -8  -1  -3   32.30    3.50
   8  -1   3   36.00    2.90
   8   1   3   31.80    3.20
  -8   1  -3   31.90    3.50
   8   1   3   33.90    3.20
   8   1   3   34.10    1.80
   8   1   3   34.10    1.80
   9  -1   3  112.89    5.00
   9  -1   3  112.39    5.20
   9  -1   3  111.69    6.40
   9  -1   3  111.59    5.70
  -9  -1  -3  116.39    6.20
  -9  -1  -3  114.59    6.60
   9   1   3  115.59    4.60
  -9   1  -3  104.39    6.60
   9   1   3  126.39    6.40
   9   1   3  110.99    4.70
  -9   1  -3  120.39    5.90
  10  -1   3  122.09    5.40
  10  -1   3  114.09    6.30
  10  -1   3  115.49    5.50
  10  -1   3  116.29    6.90
 -10  -1  -3  108.89    7.10
 -10  -1  -3  126.79    6.60
 -10   1  -3  130.69    6.30
 -10   1  -3  123.69    7.30
  10   1   3  118.49    4.80
  10   1   3  113.99    6.80
  11  -1   3    9.20    1.90
  11  -1   3   15.30    3.70
 -11  -1  -3    7.00    2.80
  11  -1   3   10.80    2.00
  11   1   3    6.40    1.20
 -11   1  -3   15.10    3.00
  11   1   3   11.20    3.40
 -11   1  -3    9.70    2.70
  12  -1   3   44.20    3.80
 -12  -1  -3   61.09    5.10
  12  -1   3   46.80    5.60
 -12   1  -3   49.99    6.00
 -12   1  -3   49.70    5.10
  12   1   3   38.50    2.80
  12   1   3   50.79    5.70
  13  -1   3    0.30    4.10
 -13  -1  -3    5.70    3.70
 -13   1  -3    3.80    3.70
  13   1   3   -5.70    3.90
 -13   1  -3    2.60    3.60
 -14  -1  -3    0.10    4.40
  14   1   3   -8.30    4.30
 -14   1  -3    1.10    4.10
 -14   1  -3    1.10    4.30
  15  -1   3   12.90    6.30
 -15  -1  -3    0.90    5.20
 -15   1  -3    9.20    5.60
  15   1   3    3.30    5.90
 -15   1  -3   12.50    6.00
  16  -1   3    8.60    7.50
 -16  -1  -3   13.00    7.40
  16   1   3    5.30    6.60
 -16   1  -3   12.10    6.60
  16  -2  -3   -6.10    6.40
 -16  -2   3    2.30    6.10
  16   2  -3   -0.90    5.60
  16   2  -3    2.50    5.60
  15  -2  -3   14.50    5.10
 -15  -2   3   15.10    6.00
  15  -2  -3    7.00    5.40
  15   2  -3    6.50    5.10
  15   2  -3    9.20    5.30
  14  -2  -3    8.40    5.20
  14  -2  -3    7.80    3.30
 -14  -2   3    3.50    4.60
  14   2  -3   12.00    3.30
 -14   2   3    5.70    4.90
  14   2  -3   -3.50    4.20
  13  -2  -3    0.90    3.90
 -13  -2   3    8.70    4.00
  13  -2  -3    2.20    3.00
  13   2  -3   -0.90    3.70
 -13   2   3    6.00    3.80
  13   2  -3   -1.30    2.40
  12  -2  -3   12.40    2.50
 -12  -2   3   15.50    3.70
  12  -2  -3   17.30    3.90
 -12   2   3   12.30    3.40
 -12   2   3   11.60    3.60
  12   2  -3   13.00    3.60
  12   2  -3   10.00    2.10
  11  -2  -3    5.00    2.90
 -11  -2   3    2.90    2.70
  11  -2  -3   -0.20    3.00
  11  -2  -3    0.60    1.90
  11  -2  -3    9.80    3.10
 -11   2   3   -2.30    2.30
 -11   2   3    0.40    2.50
  11   2  -3    0.10    2.60
  11   2  -3    0.60    1.60
  10  -2  -3  146.89    7.10
  10  -2  -3  157.98    7.00
  10  -2  -3  160.18    7.20
  10  -2  -3  148.49    7.90
 -10  -2   3  150.38    7.80
  10   2  -3  138.49    7.50
  10   2  -3  136.59    6.40
 -10   2   3  151.98    7.40
 -10   2   3  147.79    8.20
   9  -2  -3   18.80    2.30
  -9  -2   3   16.50    2.90
   9  -2  -3   15.20    2.00
   9  -2  -3   20.50    3.30
   9  -2  -3   16.10    2.40
   9   2  -3   14.10    1.70
  -9   2   3   14.30    2.70
   9   2  -3   22.40    2.90
   9   2  -3   16.40    3.00
   8  -2  -3   12.90    1.90
   8  -2  -3   16.50    2.40
   8  -2  -3   14.00    1.80
  -8  -2   3   14.80    2.40
  -8   2   3   12.60    2.20
   8   2  -3   16.80    2.50
   8   2  -3   11.50    2.20
   8   2  -3   14.40    1.80
   8   2  -3   13.40    2.40
  -8   2   3   16.70    2.10
   7  -2  -3   39.60    2.70
  -7  -2   3   31.40    2.10
  -7  -2   3   32.10    2.80
   7  -2  -3   32.40    2.40
   7  -2  -3   33.30    3.30
   7  -2  -3   36.80    3.60
   7   2  -3   36.10    3.30
   7   2  -3   34.30    2.10
  -7   2   3   36.20    3.10
   7   2  -3   32.80    3.10
  -7   2   3   34.60    2.60
   7   2  -3   38.30    3.50
   6  -2  -3  605.04   23.40
  -6  -2   3  603.24   22.80
  -6  -2   3  597.44   23.50
   6  -2  -3  631.74   23.00
   6  -2  -3  599.84   23.00
   6  -2  -3  615.84   23.70
   6   2  -3  618.34   23.60
   6   2  -3  635.64   23.20
   6   2  -3  619.14   22.70
   6   2  -3  623.94   23.50
  -6   2   3  607.84   23.00
   5  -2  -3   13.40    1.50
  -5  -2   3   10.80    1.40
   5  -2  -3   15.10    2.10
   5  -2  -3   11.30    1.50
   5  -2  -3   14.20    1.70
  -5  -2   3   10.10    1.80
  -5   2   3   13.20    1.90
   5   2  -3   14.50    2.00
  -5   2   3   12.00    1.70
   5   2  -3   14.30    1.90
   5   2  -3    9.00    1.90
   5   2  -3   12.50    1.70
   5   2  -3   10.60    1.20
  -4  -2   3    2.00    0.70
   4  -2  -3    1.00    0.90
   4  -2  -3    1.70    1.30
   4  -2  -3    1.50    0.70
  -4  -2   3   -0.30    1.00
   4  -2  -3    2.20    0.90
   4   2  -3    1.50    0.70
  -4   2   3    1.30    0.90
   4   2  -3    0.60    1.10
   4   2  -3    0.50    0.90
   4   2  -3    2.10    0.80
  -4   2   3    1.30    1.10
   3  -2  -3   20.00    1.80
  -3  -2   3   16.90    1.50
   3  -2  -3   21.80    1.50
   3  -2  -3   19.30    1.20
   3  -2  -3   19.50    1.20
  -3  -2   3   20.60    1.30
   3   2  -3   16.90    1.20
   3   2  -3   16.30    1.60
   3   2  -3   16.00    1.60
  -3   2   3   20.80    1.80
  -3   2   3   21.50    1.60
   2  -2  -3  775.42   28.40
  -2  -2   3  771.02   28.60
   2  -2  -3  790.92   28.70
   2  -2  -3  747.43   28.20
  -2  -2   3  757.92   28.30
  -2  -2   3  758.22   28.10
  -2  -2   3  816.22   28.60
   2  -2  -3  782.92   28.40
   2   2  -3  805.62   28.60
   2   2  -3  781.72   28.30
  -2   2   3  760.42   28.70
   2   2  -3  774.32   28.60
  -2   2   3  779.62   28.40
   2   2  -3  761.02   28.10
  -2   2   3  757.92   28.30
  -2   2   3  751.42   28.40
   1  -2  -3    6.80    0.80
   1  -2  -3    6.60    0.80
  -1  -2   3    7.60    1.00
   1  -2  -3    6.20    0.90
  -1  -2   3    7.30    1.00
  -1  -2   3    8.50    0.90
   1  -2  -3    7.20    0.90
   1   2  -3    9.20    0.90
   1   2  -3    6.20    0.90
   1   2  -3    7.10    1.00
  -1   2   3    8.00    0.80
  -1   2   3    5.70    0.90
  -1   2   3    8.00    0.80
  -1   2   3    6.30    0.70
   1   2  -3    6.70    0.40
   0  -2   3 1494.05   55.39
   0  -2   3 1492.95   55.39
   0  -2  -3 1569.44   55.39
   0  -2  -3 1532.55   55.39
   0  -2  -3 1523.35   55.49
   0  -2  -3 1490.85   55.39
   0  -2   3 1536.85   55.59
   0   2   3 1524.25   55.39
   0   2   3 1543.55   55.39
   0   2  -3 1512.75   55.39
   0   2  -3 1519.95   55.59
   0   2   3 1530.35   55.39
   0   2  -3 1529.35   55.39
   0   2   3 1525.05   55.59
   1  -2   3   -0.30    0.60
  -1  -2  -3    0.10    0.70
  -1  -2  -3    0.50    0.50
   1  -2   3    0.60    0.60
  -1  -2  -3    0.60    0.70
  -1  -2  -3    0.50    0.40
   1   2   3    0.00    0.50
   1   2   3   -0.40    0.60
  -1   2  -3   -0.20    0.70
   1   2   3    0.50    0.40
  -1   2  -3    0.00    0.50
   1   2   3   -0.20    0.70
  -1   2  -3    0.30    0.40
   2  -2   3 2805.52  107.59
  -2  -2  -3 3284.57  107.69
   2  -2   3 3261.67  107.79
  -2  -2  -3 2786.32  107.49
   2  -2   3 2634.74  107.29
  -2  -2  -3 2776.42  107.59
  -2   2  -3 3040.70  107.59
  -2   2  -3 2679.33  107.59
   2   2   3 3163.38  107.59
   2   2   3 2814.72  107.49
   2   2   3 3308.87  109.39
   3  -2   3   86.69    3.40
   3  -2   3   84.69    4.00
   3  -2   3   95.09    4.10
  -3  -2  -3   81.59    3.90
  -3  -2  -3   84.39    3.80
  -3  -2  -3   83.79    3.20
   3  -2   3   82.29    3.60
   3   2   3   84.59    3.80
   3   2   3   88.49    4.00
   3   2   3   83.69    3.20
  -3   2  -3   90.29    4.00
  -3   2  -3   87.09    3.60
  -3   2  -3   80.89    3.40
   3   2   3   79.39    3.80
   4  -2   3 1386.86   51.89
   4  -2   3 1413.96   52.49
   4  -2   3 1411.26   51.99
  -4  -2  -3 1484.35   52.39
   4  -2   3 1501.45   52.59
  -4  -2  -3 1384.76   52.39
   4   2   3 1449.76   52.49
   4   2   3 1463.95   52.39
  -4   2  -3 1405.96   52.49
   4   2   3 1372.96   52.29
  -4   2  -3 1360.56   51.89
  -4   2  -3 1464.75   52.09
  -5  -2  -3   21.50    2.20
  -5  -2  -3   15.40    2.20
   5  -2   3   21.30    1.60
   5  -2   3   17.60    2.20
   5   2   3   14.80    2.10
  -5   2  -3   18.10    1.60
   5   2   3   20.30    2.40
  -5   2  -3   19.70    1.80
   5   2   3   23.10    2.20
   6  -2   3   68.69    3.20
   6  -2   3   58.59    4.00
  -6  -2  -3   72.19    3.90
  -6  -2  -3   67.99    3.90
   6  -2   3   65.19    4.00
   6  -2   3   68.09    3.20
   6  -2   3   62.69    4.10
  -6   2  -3   64.19    3.30
  -6   2  -3   65.59    4.10
   6   2   3   69.59    3.90
   6   2   3   73.99    3.90
  -6   2  -3   67.19    3.40
   6   2   3   62.29    4.10
  -7  -2  -3   38.50    3.30
   7  -2   3   38.90    3.20
   7  -2   3   32.60    3.60
  -7  -2  -3   37.30    3.20
   7  -2   3   40.90    2.50
   7  -2   3   30.80    3.20
   7  -2   3   36.20    2.30
  -7   2  -3   38.10    2.60
  -7   2  -3   36.80    3.40
   7   2   3   42.60    3.30
   7   2   3   39.10    3.10
   7   2   3   44.20    3.60
   8  -2   3   76.89    4.00
  -8  -2  -3   77.29    4.60
   8  -2   3   74.29    3.70
   8  -2   3   73.29    4.70
  -8  -2  -3   72.19    4.80
  -8   2  -3   75.29    4.10
  -8   2  -3   68.79    4.80
   8   2   3   76.09    4.60
   8   2   3   74.19    4.70
   9  -2   3   17.50    2.80
   9  -2   3   15.90    2.20
  -9  -2  -3   15.20    2.80
   9   2   3   18.80    3.00
  -9   2  -3   10.00    2.60
 -10  -2  -3    0.00    2.60
  10  -2   3    0.40    1.60
  10  -2   3   -1.70    2.50
  10  -2   3    5.30    2.30
  10  -2   3    1.00    1.90
  10   2   3    4.80    2.80
 -10   2  -3    0.10    2.40
 -10   2  -3    2.70    2.20
 -11  -2  -3   30.40    4.20
  11  -2   3   22.00    2.90
  11  -2   3   20.60    3.80
  11  -2   3   27.00    3.10
  11  -2   3   33.20    4.00
 -11   2  -3   17.20    3.80
  11   2   3   20.80    3.80
 -11   2  -3   28.20    3.80
  12  -2   3    7.90    2.50
  12  -2   3    7.70    2.80
 -12  -2  -3   11.50    3.50
  12  -2   3    0.80    3.50
  12   2   3    8.70    3.50
 -12   2  -3    8.10    3.20
 -12   2  -3   12.20    3.90
  13  -2   3    0.70    2.60
 -13  -2  -3    9.70    4.10
  13  -2   3    5.50    4.10
  13   2   3   -2.20    3.80
 -13   2  -3    4.40    3.60
 -13   2  -3    1.80    3.60
  14  -2   3   25.00    6.20
 -14  -2  -3   27.90    6.00
  14  -2   3   27.00    3.90
 -14   2  -3   17.70    5.40
 -14   2  -3   30.80    5.40
  14   2   3   33.10    5.80
  15  -2   3   32.40    6.90
  15   2   3   24.80    6.50
 -15   2  -3   29.20    6.00
 -15   2  -3   27.70    5.90
  16  -2   3    6.70    7.70
 -16  -2  -3   -1.40    7.00
 -16   2  -3    6.00    6.50
  16   2   3   -6.10    5.90
 -16  -3   3   10.70    6.50
  16  -3  -3   -1.90    6.60
  16   3  -3    0.70    5.70
  16   3  -3   -4.30    5.90
 -15  -3   3    4.60    5.50
  15  -3  -3    4.00    6.00
  15   3  -3    1.00    4.70
 -15   3   3    5.50    5.30
  15   3  -3    4.10    5.00
 -14  -3   3   37.30    6.00
  14  -3  -3   20.20    7.00
  14  -3  -3   27.90    4.80
  14   3  -3   27.30    5.00
  14   3  -3   17.30    4.90
  13  -3  -3    6.30    3.10
 -13  -3   3    7.80    4.20
  13  -3  -3    1.90    4.00
  13   3  -3   -1.00    3.50
  13   3  -3    2.70    3.40
 -13   3   3    0.00    3.40
 -12  -3   3   27.10    4.40
  12  -3  -3   28.70    3.20
  12  -3  -3   25.50    3.80
  12  -3  -3   22.90    4.40
  12   3  -3   18.80    3.70
  12   3  -3   24.60    3.20
  12   3  -3   17.00    2.30
  12   3  -3   16.80    3.90
 -12   3   3   19.60    4.10
  11  -3  -3    5.90    2.80
 -11  -3   3   -1.60    2.90
  11  -3  -3    1.50    3.00
  11  -3  -3   -1.00    2.00
  11   3  -3   -2.30    2.60
  11   3  -3    0.40    2.50
 -11   3   3    1.60    3.00
  11   3  -3   -2.40    1.60
  10  -3  -3    3.50    2.20
 -10  -3   3    1.20    2.70
  10  -3  -3    1.30    1.70
  10  -3  -3   -0.20    2.70
  10   3  -3    2.90    2.40
  10   3  -3    1.80    2.10
 -10   3   3   -1.70    2.40
  10   3  -3   -0.40    1.40
  -9  -3   3    7.00    2.30
  -9  -3   3    5.60    1.40
   9  -3  -3    7.30    1.80
   9  -3  -3   12.00    2.00
   9  -3  -3    3.90    2.00
  -9   3   3    4.90    2.20
   9   3  -3    6.60    1.50
   9   3  -3    8.50    2.40
   9   3  -3    5.60    2.20
   8  -3  -3    0.50    1.50
  -8  -3   3    0.80    1.10
   8  -3  -3    1.00    2.00
   8  -3  -3    1.20    1.40
  -8  -3   3    0.60    1.80
   8   3  -3    3.00    1.80
   8   3  -3    0.30    1.60
  -8   3   3    2.10    1.80
   8   3  -3    1.00    1.20
   7  -3  -3    1.80    1.80
   7  -3  -3   -0.90    1.10
   7  -3  -3    0.20    1.20
  -7  -3   3   -0.10    1.00
   7  -3  -3    2.50    2.40
  -7  -3   3   -1.10    1.70
   7   3  -3   -1.70    1.40
  -7   3   3   -0.80    1.40
   7   3  -3   -0.90    1.60
   7   3  -3    1.10    1.00
   7   3  -3    0.00    2.00
   7   3  -3    0.20    1.40
  -6  -3   3   17.40    2.40
   6  -3  -3   16.80    1.50
   6  -3  -3   11.70    1.90
   6  -3  -3   15.90    2.00
  -6  -3   3   15.50    1.60
   6  -3  -3   16.90    2.50
   6   3  -3   13.30    1.60
   6   3  -3   19.10    2.60
  -6   3   3   17.10    2.20
   6   3  -3   17.60    1.90
   6   3  -3   12.40    2.20
   6   3  -3   13.90    2.40
  -6   3   3   21.20    2.70
  -5  -3   3    3.10    1.60
   5  -3  -3    6.90    2.10
   5  -3  -3    6.00    1.00
   5  -3  -3    6.80    1.00
  -5  -3   3    8.50    1.10
   5  -3  -3    5.00    1.20
   5  -3  -3    9.80    1.60
   5   3  -3    8.70    1.10
   5   3  -3    8.30    1.30
   5   3  -3    5.50    1.60
  -5   3   3    7.00    1.80
  -5   3   3    8.80    1.60
   5   3  -3    5.20    1.90
  -4  -3   3  123.19    5.10
   4  -3  -3  127.79    5.00
   4  -3  -3  125.79    4.90
   4  -3  -3  131.49    5.90
  -4  -3   3  118.49    5.10
   4  -3  -3  123.59    5.40
  -4  -3   3  118.69    5.70
   4  -3  -3  128.09    5.50
   4   3  -3  116.09    5.70
   4   3  -3  127.79    5.10
  -4   3   3  126.29    5.50
   4   3  -3  119.79    5.70
  -4   3   3  130.99    5.90
  -4   3   3  130.89    5.40
   4   3  -3  123.79    5.10
  -3  -3   3   16.60    1.30
   3  -3  -3   16.20    1.70
   3  -3  -3   16.70    1.50
  -3  -3   3   16.40    1.70
   3  -3  -3   18.00    1.90
   3  -3  -3   16.40    1.10
  -3  -3   3   17.40    1.90
  -3  -3   3   17.70    1.10
   3   3  -3   18.90    1.40
   3   3  -3   15.70    1.10
   3   3  -3   16.50    1.70
   3   3  -3   16.20    1.80
  -3   3   3   17.00    1.80
  -3   3   3   15.50    1.50
  -3   3   3   16.60    1.60
   2  -3  -3  176.88    7.10
  -2  -3   3  176.18    7.00
  -2  -3   3  181.48    6.70
   2  -3  -3  184.08    7.40
  -2  -3   3  165.28    7.20
   2  -3  -3  179.48    6.80
  -2  -3   3  182.38    7.30
   2   3  -3  175.68    6.70
  -2   3   3  183.78    7.10
   2   3  -3  180.58    7.00
   2   3  -3  178.98    7.30
   2   3  -3  174.08    7.30
  -2   3   3  177.98    7.40
  -2   3   3  185.48    7.10
  -2   3   3  181.38    6.80
   1  -3  -3    4.40    0.80
  -1  -3   3    5.00    0.90
   1  -3  -3    3.50    0.90
   1  -3  -3    3.50    0.70
  -1  -3   3    5.90    0.60
  -1  -3   3    6.30    0.80
  -1  -3   3    6.50    1.10
   1  -3  -3    4.80    0.70
  -1   3   3    4.70    0.80
   1   3  -3    4.50    0.60
   1   3  -3    5.70    1.00
   1   3  -3    5.00    0.80
  -1   3   3    3.10    1.00
  -1   3   3    4.20    0.80
   1   3  -3    6.10    1.00
  -1   3   3    4.10    0.80
   0  -3  -3   59.29    2.80
   0  -3  -3   57.39    2.70
   0  -3  -3   62.29    2.70
   0  -3  -3   56.79    2.60
   0  -3   3   59.89    2.90
   0  -3   3   59.79    2.60
   0  -3   3   58.79    2.60
   0  -3   3   56.09    2.70
   0   3   3   52.39    2.80
   0   3   3   55.89    2.80
   0   3  -3   57.19    2.90
   0   3  -3   58.09    2.60
   0   3   3   60.29    2.70
   0   3  -3   58.09    2.60
   0   3   3   59.29    2.60
   0   3  -3   58.59    2.70
   1  -3   3  233.28    8.90
  -1  -3  -3  224.28    8.90
   1  -3   3  222.38    8.80
  -1  -3  -3  230.08    8.70
  -1  -3  -3  241.18    8.90
   1  -3   3  227.58    9.00
  -1  -3  -3  223.28    9.00
  -1   3  -3  227.08    8.90
   1   3   3  235.88    8.70
  -1   3  -3  228.78    8.60
   1   3   3  229.88    8.90
   1   3   3  229.78    8.90
  -1   3  -3  225.18    8.80
   1   3   3  232.68    8.90
  -1   3  -3  224.18    9.00
  -2  -3  -3  354.46   13.30
   2  -3   3  340.27   13.50
   2  -3   3  361.26   13.80
   2  -3   3  356.76   13.80
  -2  -3  -3  360.56   13.80
  -2  -3  -3  375.56   13.60
  -2   3  -3  350.56   13.60
  -2   3  -3  359.36   13.20
  -2   3  -3  352.46   13.80
   2   3   3  373.56   13.30
   2   3   3  350.26   13.60
  -2   3  -3  354.06   13.20
   2   3   3  357.06   13.70
   2   3   3  382.96   13.80
   3  -3   3   14.90    1.90
   3  -3   3   15.20    0.80
  -3  -3  -3   14.30    1.70
   3  -3   3   16.60    1.80
   3  -3   3   17.70    1.40
  -3  -3  -3   16.40    1.00
  -3  -3  -3   14.50    1.80
   3   3   3   12.90    1.70
  -3   3  -3   17.50    1.90
  -3   3  -3   12.50    1.40
   3   3   3   14.20    1.00
  -3   3  -3   14.70    0.80
   3   3   3   16.40    1.70
   3   3   3   15.00    1.50
   4  -3   3  751.72   28.70
  -4  -3  -3  784.22   27.90
   4  -3   3  735.33   28.30
  -4  -3  -3  761.32   28.80
   4  -3   3  744.93   27.90
   4  -3   3  771.52   28.80
  -4  -3  -3  809.02   28.50
   4   3   3  764.92   28.50
  -4   3  -3  745.23   28.80
   4   3   3  805.02   28.70
  -4   3  -3  769.42   28.30
   4   3   3  777.82   27.90
   4   3   3  793.52   28.70
  -4   3  -3  717.63   27.90
   4   3   3  737.73   28.70
   5  -3   3  121.29    5.90
   5  -3   3  125.89    5.90
  -5  -3  -3  114.99    4.50
   5  -3   3  121.09    4.70
  -5  -3  -3  118.39    5.50
   5  -3   3  114.99    5.80
   5  -3   3  120.29    5.20
  -5  -3  -3  121.59    5.80
  -5   3  -3  120.09    5.20
   5   3   3  118.29    5.40
   5   3   3  112.29    4.50
  -5   3  -3  123.09    5.80
   5   3   3  111.39    5.50
   5   3   3  117.69    5.80
  -5   3  -3  117.99    4.70
   6  -3   3    8.70    2.00
  -6  -3  -3   10.00    1.80
   6  -3   3   13.00    2.50
  -6   3  -3   17.10    2.10
   6   3   3    8.10    1.70
   6   3   3    9.90    2.00
  -6   3  -3   11.40    1.90
  -7  -3  -3    1.40    1.80
   7  -3   3    1.20    2.60
   7  -3   3    1.80    1.10
   7  -3   3    1.70    1.70
  -7  -3  -3    3.20    1.80
  -7   3  -3    0.60    1.50
   7   3   3    1.90    2.00
  -7   3  -3    0.50    1.10
  -7   3  -3    1.30    1.60
   7   3   3    2.40    1.60
   8  -3   3    0.50    1.90
   8  -3   3    3.00    1.40
   8  -3   3    2.90    1.40
  -8  -3  -3    4.90    2.30
  -8  -3  -3    5.50    2.00
  -8   3  -3    2.00    2.10
  -8   3  -3    1.60    1.40
   8   3   3    3.50    1.90
   9  -3   3   -1.00    1.40
   9  -3   3    4.90    2.60
   9  -3   3    0.80    1.70
  -9  -3  -3    1.70    2.20
  -9   3  -3    1.70    2.30
   9   3   3    5.40    2.30
  -9   3  -3    0.00    1.60
  10  -3   3    3.60    1.70
  10  -3   3    7.00    2.20
  10  -3   3    4.90    3.00
 -10  -3  -3    2.40    2.70
  10   3   3    6.60    2.70
 -10   3  -3    4.10    2.60
  11  -3   3    1.90    2.60
  11  -3   3    0.50    1.90
  11  -3   3    5.10    2.80
 -11  -3  -3    2.70    3.20
  11  -3   3    1.70    2.90
 -11   3  -3   -2.50    2.80
  11   3   3    0.20    2.70
 -11   3  -3    2.90    2.50
 -12  -3  -3    9.70    3.60
  12  -3   3    5.90    3.80
  12  -3   3   10.60    2.70
  12   3   3    5.40    3.50
 -12   3  -3    4.20    3.60
 -12   3  -3    6.40    3.20
  13  -3   3    4.40    4.40
 -13  -3  -3    2.90    4.00
  13  -3   3    0.30    2.70
  13   3   3   -0.30    3.80
 -13   3  -3    0.90    4.10
 -13   3  -3   -4.70    3.40
 -14  -3  -3    7.40    5.70
  14  -3   3   12.00    4.10
  14  -3   3    5.60    5.60
 -14   3  -3    8.50    4.60
 -14   3  -3   14.40    5.00
  14   3   3    4.20    5.00
  15  -3   3    9.90    6.70
 -15  -3  -3   15.80    6.40
 -15   3  -3   13.30    5.50
  15   3   3    0.00    5.80
  16  -3   3   -9.00    6.80
 -16  -3  -3   -1.30    6.90
 -16   3  -3   -1.20    6.60
  16   3   3   -7.70    6.10
  16   3   3    2.50    6.10
  16  -4  -3    3.10    6.60
 -16  -4   3    6.60    7.20
 -16   4   3   10.30    7.00
  16   4  -3   -1.70    5.90
  16   4  -3    2.80    5.60
 -15  -4   3   13.20    6.00
  15  -4  -3    7.00    6.00
  15  -4  -3    5.40    5.40
  15   4  -3   12.30    5.20
 -15   4   3   -0.60    5.60
  15   4  -3   -0.20    5.00
  14  -4  -3   20.40    4.60
  14  -4  -3   32.50    6.80
 -14   4   3   25.00    7.00
  14   4  -3   29.70    5.50
  14   4  -3   26.30    5.30
 -13  -4   3   18.90    4.90
  13  -4  -3   29.40    5.30
  13  -4  -3   19.40    3.60
  13   4  -3   14.10    4.40
 -13   4   3   17.70    4.90
  13   4  -3   14.70    2.50
  13   4  -3   22.80    4.40
  12  -4  -3    0.70    2.50
  12  -4  -3   -3.70    3.40
 -12  -4   3   -2.10    3.50
  12   4  -3   -3.60    2.90
 -12   4   3   -0.40    3.40
  12   4  -3    0.50    3.00
  11  -4  -3   -0.80    2.20
  11  -4  -3    8.00    2.40
  11  -4  -3    5.90    3.50
 -11  -4   3   10.50    3.60
 -11   4   3    3.00    2.90
  11   4  -3    3.00    2.70
  11   4  -3    0.70    2.60
  11   4  -3    0.60    1.80
 -10  -4   3    2.60    2.70
 -10  -4   3    4.10    1.60
  10  -4  -3    2.30    1.90
  10  -4  -3    5.50    2.00
 -10   4   3    2.20    2.40
  10   4  -3    0.70    2.30
  10   4  -3    0.20    1.50
  10   4  -3    1.20    2.50
  -9  -4   3  364.46   14.30
   9  -4  -3  373.56   14.30
   9  -4  -3  376.16   14.90
  -9  -4   3  393.66   15.80
   9   4  -3  361.66   14.20
   9   4  -3  372.46   15.80
   9   4  -3  364.66   15.00
  -9   4   3  359.26   15.70
  -8  -4   3   -1.40    1.10
   8  -4  -3   -0.30    1.20
  -8  -4   3   -0.70    1.90
   8  -4  -3    2.10    1.30
   8  -4  -3   -1.90    1.50
   8   4  -3   -1.50    1.70
   8   4  -3    0.40    1.20
  -8   4   3    0.70    1.70
   8   4  -3   -2.60    1.60
   7  -4  -3   41.30    3.80
  -7  -4   3   42.30    2.50
   7  -4  -3   42.40    3.10
  -7  -4   3   39.00    3.50
   7  -4  -3   43.60    2.40
   7   4  -3   45.90    2.60
   7   4  -3   41.80    3.00
  -7   4   3   43.20    3.60
   7   4  -3   44.10    3.60
   6  -4  -3    0.30    1.50
   6  -4  -3    4.20    1.00
   6  -4  -3    3.80    0.90
  -6  -4   3    1.10    1.70
   6  -4  -3    3.90    2.30
  -6  -4   3    3.90    1.30
  -6  -4   3    5.90    1.10
   6  -4  -3    3.80    1.40
  -6   4   3    4.40    1.60
   6   4  -3    2.20    1.30
   6   4  -3    1.50    0.90
  -6   4   3    6.00    2.10
   6   4  -3    5.20    1.30
   6   4  -3    4.40    2.10
   5  -4  -3   28.20    2.70
  -5  -4   3   29.80    2.10
  -5  -4   3   30.30    2.70
   5  -4  -3   29.80    3.10
  -5  -4   3   28.60    2.00
   5  -4  -3   27.00    1.60
   5  -4  -3   32.00    1.70
   5  -4  -3   27.70    2.40
   5   4  -3   31.20    2.10
   5   4  -3   32.90    2.00
  -5   4   3   28.00    2.50
   5   4  -3   24.90    2.90
  -5   4   3   25.80    3.10
  -5   4   3   29.70    3.00
   5   4  -3   32.10    2.90
  -4  -4   3   32.10    2.10
   4  -4  -3   34.40    1.70
   4  -4  -3   32.20    2.60
  -4  -4   3   29.30    2.90
   4  -4  -3   29.30    2.90
   4  -4  -3   31.60    1.70
  -4  -4   3   26.30    3.30
   4   4  -3   29.60    2.90
  -4   4   3   31.60    2.40
   4   4  -3   29.50    3.20
  -4   4   3   30.50    3.30
  -4   4   3   35.30    2.60
   4   4  -3   33.20    2.00
   4   4  -3   31.80    1.90
   3  -4  -3  596.04   22.30
   3  -4  -3  600.04   22.90
  -3  -4   3  578.34   23.10
   3  -4  -3  616.74   22.90
  -3  -4   3  597.64   22.60
   3  -4  -3  622.44   23.30
  -3  -4   3  611.84   22.40
  -3  -4   3  637.34   23.20
   3   4  -3  628.34   23.10
  -3   4   3  622.44   22.90
   3   4  -3  613.14   22.60
   3   4  -3  589.24   22.40
  -3   4   3  616.34   22.40
   3   4  -3  599.04   23.10
  -3   4   3  611.74   23.30
  -3   4   3  610.44   22.90
  -2  -4   3    4.50    1.20
  -2  -4   3    4.30    1.20
   2  -4  -3    6.30    1.10
  -2  -4   3    6.00    0.80
   2  -4  -3    6.10    1.10
  -2  -4   3    6.00    1.00
   2  -4  -3    6.40    1.40
   2  -4  -3    5.80    0.80
  -2   4   3    5.40    1.30
  -2   4   3    8.30    1.30
   2   4  -3    5.20    1.40
  -2   4   3    6.70    0.90
  -2   4   3    6.00    1.10
   2   4  -3    4.10    1.10
   2   4  -3    6.40    0.80
   2   4  -3    6.00    1.10
  -1  -4   3   98.19    4.60
  -1  -4   3   95.59    4.30
  -1  -4   3  100.09    4.00
   1  -4  -3   98.99    4.10
   1  -4  -3  101.29    4.60
   1  -4  -3   98.19    4.30
  -1  -4   3   96.89    4.40
   1  -4  -3  104.19    4.40
  -1   4   3  100.49    4.30
   1   4  -3   99.99    4.10
   1   4  -3   97.19    4.40
  -1   4   3  102.09    4.60
   1   4  -3   95.19    4.30
  -1   4   3   95.39    4.30
   1   4  -3   96.69    4.60
  -1   4   3  108.99    4.40
   0  -4  -3   17.00    1.60
   0  -4   3   15.60    1.70
   0  -4   3   15.80    1.40
   0  -4  -3   16.30    1.50
   0  -4   3   16.80    1.40
   0  -4  -3   14.90    1.60
   0  -4  -3   15.70    1.40
   0  -4   3   16.70    1.40
   0   4  -3   16.60    1.40
   0   4   3   15.10    1.50
   0   4   3   18.00    1.40
   0   4   3   16.10    1.60
   0   4  -3   15.80    1.50
   0   4  -3   14.60    1.60
   0   4  -3   14.20    1.70
   0   4   3   15.90    1.60
   1  -4   3   99.59    4.40
  -1  -4  -3  100.09    4.50
   1  -4   3  100.09    4.60
  -1  -4  -3   96.29    4.20
   1  -4   3   96.39    4.30
  -1  -4  -3   99.29    4.40
   1  -4   3   98.09    4.10
  -1  -4  -3  104.09    4.40
   1   4   3  105.69    4.20
  -1   4  -3   97.49    4.40
   1   4   3   97.59    4.50
  -1   4  -3   98.59    4.40
   1   4   3  102.79    4.40
  -1   4  -3   98.49    4.60
  -1   4  -3   98.89    4.10
   1   4   3  101.99    4.50
   2  -4   3   75.29    3.50
  -2  -4  -3   72.69    3.70
  -2  -4  -3   76.59    3.80
  -2  -4  -3   73.29    3.60
  -2  -4  -3   71.79    3.20
   2  -4   3   76.09    3.80
   2  -4   3   74.79    3.80
  -2   4  -3   73.99    3.00
  -2   4  -3   73.39    3.00
   2   4   3   71.59    3.70
  -2   4  -3   76.09    3.60
  -2   4  -3   76.69    3.90
   2   4   3   74.19    3.20
   2   4   3   73.19    3.70
   2   4   3   69.59    3.50
  -2   4  -3   73.79    3.70
   3  -4   3   11.60    1.80
  -3  -4  -3   10.40    1.80
  -3  -4  -3   12.50    1.80
  -3  -4  -3   11.60    1.20
   3  -4   3   14.20    1.90
   3  -4   3   10.60    1.50
   3   4   3   11.90    1.60
  -3   4  -3   10.60    1.40
  -3   4  -3    9.30    1.60
   3   4   3   13.30    1.90
   3   4   3   12.70    1.70
  -4  -4  -3    5.20    1.50
  -4  -4  -3    3.00    1.70
   4  -4   3    3.30    1.20
   4  -4   3    2.50    1.50
   4  -4   3    1.90    1.60
  -4  -4  -3    5.30    0.80
  -4   4  -3    4.90    1.50
   4   4   3    5.60    0.80
   4   4   3    4.60    1.40
   4   4   3    4.50    1.60
  -4   4  -3    2.40    1.20
   5  -4   3   13.40    2.00
   5  -4   3   12.60    2.20
  -5  -4  -3   14.90    2.30
  -5  -4  -3   15.40    2.20
   5  -4   3   19.70    2.80
  -5  -4  -3   14.30    1.20
   5   4   3   13.20    1.10
   5   4   3   14.20    2.00
   5   4   3   12.40    2.00
   5   4   3   14.30    2.10
   5   4   3   14.90    2.30
  -5   4  -3   14.40    2.10
  -5   4  -3   15.70    1.80
  -6  -4  -3   75.19    4.60
   6  -4   3   64.59    4.80
   6  -4   3   74.19    3.00
   6  -4   3   70.89    4.60
  -6  -4  -3   71.09    4.00
  -6  -4  -3   68.19    3.00
   6  -4   3   76.99    3.90
  -6   4  -3   70.79    3.00
  -6   4  -3   75.19    3.90
   6   4   3   72.49    4.40
  -6   4  -3   75.99    4.50
   6   4   3   68.99    2.90
   6   4   3   69.89    4.20
   6   4   3   65.19    4.40
   6   4   3   71.59    4.60
  -7  -4  -3    4.50    1.90
   7  -4   3    4.20    1.50
  -7  -4  -3    5.00    0.70
  -7  -4  -3    2.80    2.00
   7  -4   3    5.90    2.20
   7  -4   3    5.10    1.10
  -7   4  -3    6.40    1.70
  -7   4  -3    3.90    1.10
   7   4   3    2.10    1.80
   7   4   3    5.10    0.70
   7   4   3    7.60    2.00
  -7   4  -3    5.80    1.90
  -8  -4  -3    8.40    2.60
  -8  -4  -3   10.10    2.60
   8  -4   3   10.90    1.80
   8  -4   3    9.80    2.50
   8  -4   3   12.00    1.90
  -8   4  -3   12.40    2.30
   8   4   3   17.00    2.50
  -8   4  -3   12.60    2.60
  -8   4  -3   10.90    1.60
   8   4   3   11.40    2.40
  -9  -4  -3  162.98    7.90
   9  -4   3  135.19    6.30
   9  -4   3  155.38    8.10
   9  -4   3  163.18    6.90
   9   4   3  143.69    8.10
  -9   4  -3  130.09    8.00
   9   4   3  157.58    7.60
  -9   4  -3  144.29    6.50
  10  -4   3    2.60    1.80
  10  -4   3    0.30    2.00
 -10  -4  -3    1.00    2.70
  10  -4   3    1.60    2.80
  10   4   3   -0.20    2.50
  10   4   3    1.50    2.50
 -10   4  -3    2.50    2.10
 -10   4  -3   -0.10    2.40
  11  -4   3   39.10    4.00
 -11  -4  -3   49.50    5.30
  11  -4   3   30.10    3.90
  11  -4   3   37.30    5.30
  11   4   3   37.40    5.50
 -11   4  -3   34.10    4.70
  11   4   3   50.39    4.90
 -11   4  -3   38.00    4.10
  12  -4   3   10.60    4.40
  12  -4   3    9.90    2.90
 -12  -4  -3    3.90    3.70
 -12   4  -3    4.20    3.50
  12   4   3    2.00    3.20
  12   4   3    6.70    3.80
  13  -4   3   -4.70    3.10
 -13  -4  -3    1.90    4.20
  13   4   3    4.20    4.10
 -13   4  -3    0.90    4.60
  14  -4   3    4.00    3.70
 -14  -4  -3   -0.80    5.90
  14  -4   3   -2.30    5.80
 -14   4  -3   -2.60    4.50
  14   4   3   -3.50    4.50
  14   4   3    5.40    4.60
 -15  -4  -3   -2.10    6.10
  15  -4   3   -0.20    6.60
 -15   4  -3    5.90    5.50
  15   4   3    1.90    5.30
  15   4   3    4.50    5.40
  16  -4   3   -4.90    6.80
 -16  -4  -3   13.60    7.70
 -16   4  -3   12.60    6.90
  16   4   3   -1.20    6.20
  16   4   3   -4.20    6.00
  16  -5  -3    1.40    7.60
 -16  -5   3    6.30    7.90
  16  -5  -3   -4.70    6.70
  16   5  -3    5.00    6.50
 -16   5   3  -13.10    6.70
  16   5  -3   -1.10    5.80
  15  -5  -3   -5.80    6.60
  15  -5  -3   -3.40    5.80
 -15  -5   3   11.20    6.80
  15   5  -3   -4.30    4.80
 -15   5   3   13.40    6.30
  15   5  -3    6.80    5.10
 -14  -5   3   -1.60    5.20
  14  -5  -3   -1.60    3.80
  14  -5  -3  -10.70    5.20
  14   5  -3   -4.40    4.10
 -14   5   3    4.20    5.20
  14   5  -3   -0.50    4.10
  13  -5  -3   39.00    5.00
  13  -5  -3   35.90    8.50
 -13  -5   3   48.90    6.80
 -13   5   3   35.90    5.50
  13   5  -3   47.70    5.60
  12  -5  -3    6.00    4.30
  12  -5  -3    4.50    2.90
  12  -5  -3    1.30    2.20
 -12  -5   3    6.90    4.20
  12   5  -3    8.40    3.40
 -12   5   3    3.90    3.40
  12   5  -3    2.60    3.10
  11  -5  -3   20.00    2.40
  11  -5  -3   24.60    4.50
  11  -5  -3   18.10    3.20
  11  -5  -3   16.40    2.30
 -11  -5   3   16.50    4.00
  11   5  -3   12.10    2.10
 -11   5   3   17.60    4.00
  11   5  -3   14.40    3.20
  11   5  -3   21.90    3.50
 -10  -5   3    1.80    1.70
 -10  -5   3   -1.20    2.90
  10  -5  -3    1.60    1.60
  10  -5  -3    2.50    1.70
  10  -5  -3   -2.00    2.10
  10   5  -3   -0.50    2.30
  10   5  -3    2.60    1.60
  10   5  -3   -0.10    2.50
 -10   5   3    2.50    2.60
   9  -5  -3   13.00    1.70
   9  -5  -3   15.30    2.50
  -9  -5   3   15.90    3.10
  -9  -5   3   13.20    2.00
   9  -5  -3   11.90    2.40
   9   5  -3   13.70    2.70
   9   5  -3   12.70    2.90
   9   5  -3   12.30    1.80
  -9   5   3   16.10    3.00
   8  -5  -3    7.10    1.90
   8  -5  -3    8.30    1.20
  -8  -5   3    7.00    2.50
  -8  -5   3    8.20    1.60
   8  -5  -3    5.60    1.20
   8   5  -3    4.70    2.20
   8   5  -3   11.00    2.30
   8   5  -3    7.70    1.60
  -8   5   3    5.60    2.20
  -7  -5   3    1.70    1.50
   7  -5  -3    1.20    0.90
   7  -5  -3    1.60    0.80
  -7  -5   3   -1.20    1.70
  -7  -5   3    3.60    1.30
   7  -5  -3   -1.40    1.50
   7  -5  -3    1.50    1.90
   7   5  -3    0.50    1.20
   7   5  -3    0.40    1.80
  -7   5   3    3.50    2.20
   7   5  -3    1.00    1.50
  -7   5   3    2.40    1.80
   6  -5  -3    0.80    0.70
   6  -5  -3    1.90    1.40
  -6  -5   3    0.20    1.00
  -6  -5   3   -0.50    1.60
   6  -5  -3    0.40    0.60
  -6  -5   3    0.20    1.20
   6  -5  -3    1.70    1.80
  -6   5   3    0.70    1.60
   6   5  -3    0.70    1.20
   6   5  -3    0.20    1.10
   6   5  -3    2.10    1.50
  -6   5   3   -1.50    1.90
  -6   5   3    3.30    1.60
  -5  -5   3   39.20    2.50
   5  -5  -3   40.80    1.80
   5  -5  -3   38.40    3.30
   5  -5  -3   40.00    3.80
  -5  -5   3   36.80    3.20
  -5  -5   3   41.00    2.40
   5  -5  -3   42.10    2.90
   5  -5  -3   42.30    1.80
  -5   5   3   41.00    3.30
   5   5  -3   35.40    3.50
   5   5  -3   40.50    3.40
  -5   5   3   40.90    3.60
   5   5  -3   38.10    2.40
  -5   5   3   41.40    3.10
   5   5  -3   41.40    2.40
   4  -5  -3    8.40    1.60
   4  -5  -3    8.00    1.00
   4  -5  -3   10.70    2.30
  -4  -5   3   11.00    2.00
  -4  -5   3   11.70    1.40
  -4  -5   3    8.60    1.90
  -4  -5   3   11.30    1.40
   4  -5  -3   11.00    1.60
   4   5  -3    9.50    1.30
  -4   5   3   12.60    2.40
  -4   5   3    9.50    1.80
   4   5  -3    7.90    1.80
   4   5  -3   10.70    1.40
   4   5  -3    9.90    2.00
  -4   5   3   12.10    1.70
   3  -5  -3  230.28    9.90
   3  -5  -3  231.38    8.90
  -3  -5   3  240.08    9.00
  -3  -5   3  242.78    9.30
   3  -5  -3  233.48    9.50
   3  -5  -3  231.08    9.50
  -3  -5   3  238.58    9.90
  -3   5   3  218.98   10.40
   3   5  -3  230.28    9.20
  -3   5   3  234.28    9.60
  -3   5   3  237.88    8.90
   3   5  -3  231.28    9.80
  -3   5   3  238.78    9.50
   3   5  -3  233.98    9.90
   3   5  -3  233.58    9.00
  -2  -5   3    0.30    0.80
  -2  -5   3   -0.50    1.10
   2  -5  -3    0.70    1.00
  -2  -5   3    0.00    1.30
  -2  -5   3    1.30    1.00
   2  -5  -3   -0.30    1.40
  -2   5   3    0.20    1.40
  -2   5   3    0.50    1.10
  -2   5   3   -0.60    0.80
   2   5  -3    0.10    0.80
   2   5  -3   -2.20    1.30
  -2   5   3    1.20    1.10
   2   5  -3    0.00    1.00
   1  -5  -3  105.89    4.50
   1  -5  -3  106.09    5.00
  -1  -5   3  108.89    4.70
  -1  -5   3  108.09    5.10
   1  -5  -3  104.49    4.80
  -1  -5   3   99.09    4.70
   1  -5  -3  109.29    4.80
   1   5  -3  103.69    4.80
   1   5  -3  106.59    5.20
  -1   5   3  101.39    4.50
   1   5  -3  109.59    4.70
  -1   5   3   97.99    4.70
   1   5  -3  107.39    4.50
  -1   5   3  106.19    4.90
  -1   5   3  102.09    5.00
   0  -5   3   33.90    2.30
   0  -5   3   32.80    2.60
   0  -5  -3   33.90    2.40
   0  -5   3   30.00    2.10
   0  -5  -3   34.10    2.20
   0  -5   3   28.30    2.10
   0  -5  -3   28.10    2.20
   0  -5  -3   31.30    2.40
   0   5   3   33.90    2.50
   0   5  -3   32.60    2.30
   0   5  -3   32.30    2.10
   0   5   3   35.50    2.20
   0   5  -3   28.50    2.10
   0   5  -3   33.30    2.70
   0   5   3   31.50    2.20
   0   5   3   37.30    2.50
  -1  -5  -3  831.32   31.00
  -1  -5  -3  839.42   31.20
  -1  -5  -3  882.81   31.30
   1  -5   3  839.02   31.30
   1  -5   3  737.43   31.30
  -1  -5  -3  850.41   31.10
   1  -5   3  879.71   31.20
   1  -5   3  842.92   30.80
   1   5   3  848.42   31.30
  -1   5  -3  768.02   31.40
   1   5   3  833.32   31.20
   1   5   3  859.31   31.00
   1   5   3  848.92   31.10
  -1   5  -3  855.91   31.10
  -1   5  -3  819.92   31.50
  -1   5  -3  852.41   31.20
  -2  -5  -3   79.29    4.30
  -2  -5  -3   88.99    4.20
   2  -5   3   89.19    4.40
  -2  -5  -3   83.39    3.80
   2  -5   3   82.49    4.50
  -2  -5  -3   88.39    4.40
   2   5   3   92.29    4.10
   2   5   3   86.89    4.40
   2   5   3   82.69    4.20
  -2   5  -3   90.99    4.20
  -2   5  -3   83.89    3.50
   2   5   3   84.59    4.30
  -2   5  -3   82.59    4.30
  -3  -5  -3  201.68    8.70
  -3  -5  -3  206.38    8.80
   3  -5   3  209.28    8.80
  -3  -5  -3  207.58    8.10
   3  -5   3  197.68    8.80
   3  -5   3  205.58    8.50
  -3  -5  -3  218.08    8.50
  -3   5  -3  198.18    8.90
   3   5   3  210.18    8.50
  -3   5  -3  200.48    8.80
   3   5   3  206.88    8.80
   3   5   3  212.18    8.10
  -3   5  -3  203.88    8.50
  -4  -5  -3   28.40    2.90
   4  -5   3   35.60    2.50
   4  -5   3   31.70    3.30
   4  -5   3   33.70    3.20
  -4  -5  -3   29.60    2.50
  -4  -5  -3   29.00    1.90
  -4   5  -3   33.80    3.00
   4   5   3   29.60    1.90
   4   5   3   30.20    3.00
  -4   5  -3   34.10    2.70
   4   5   3   33.40    2.80
   4   5   3   23.60    2.50
  -5  -5  -3   73.89    4.10
   5  -5   3   64.69    4.50
   5  -5   3   68.59    3.90
  -5  -5  -3   75.59    3.20
  -5  -5  -3   70.99    4.40
   5  -5   3   65.29    4.70
   5   5   3   73.19    3.20
  -5   5  -3   73.09    4.50
   5   5   3   72.49    4.40
  -5   5  -3   68.29    4.10
   5   5   3   72.49    4.40
  -6  -5  -3   48.80    2.40
  -6  -5  -3   45.20    3.50
  -6  -5  -3   47.90    3.80
   6  -5   3   48.80    3.20
  -6   5  -3   54.09    4.00
  -6   5  -3   46.90    3.50
   6   5   3   49.20    3.80
   6   5   3   43.40    3.40
  -7  -5  -3  151.88    7.50
  -7  -5  -3  143.19    7.00
   7  -5   3  148.29    6.70
  -7  -5  -3  152.28    5.80
  -7   5  -3  134.59    6.80
   7   5   3  150.88    7.00
   7   5   3  152.88    7.60
  -7   5  -3  139.79    7.50
   7   5   3  149.09    5.80
   8  -5   3   37.60    3.10
  -8  -5  -3   31.90    3.70
   8  -5   3   30.20    4.00
  -8  -5  -3   30.20    1.70
   8   5   3   30.80    1.70
   8   5   3   35.40    3.50
   8   5   3   27.90    4.00
  -8   5  -3   27.60    4.00
   9  -5   3   18.70    2.40
  -9  -5  -3   14.40    3.30
   9  -5   3   10.90    1.50
   9  -5   3   12.40    3.30
   9   5   3   15.80    3.10
  -9   5  -3   14.10    2.80
   9   5   3   19.90    3.20
 -10  -5  -3   21.00    3.80
  10  -5   3   19.20    2.90
  10  -5   3   17.70    4.00
  10   5   3   17.70    3.40
  10   5   3   20.00    3.50
 -10   5  -3   21.20    3.60
  11  -5   3    1.90    3.40
 -11  -5  -3    1.00    3.50
  11  -5   3   -0.90    1.80
  11  -5   3    4.60    2.40
  11   5   3    1.00    3.00
  11   5   3    1.50    2.80
 -11   5  -3   -1.60    3.10
  12  -5   3    9.10    3.40
 -12  -5  -3    5.00    4.10
  12  -5   3   12.20    4.60
  12   5   3    1.60    3.40
  12   5   3    5.50    3.80
 -12   5  -3    7.30    3.90
  13  -5   3    4.30    3.60
  13  -5   3    0.50    4.90
  13   5   3    3.30    4.20
  13   5   3    2.60    4.20
 -13   5  -3   -2.10    4.50
  14  -5   3   -2.30    4.40
  14  -5   3    8.60    6.00
 -14  -5  -3   -1.10    5.80
 -14   5  -3    1.90    5.40
  14   5   3    1.80    4.40
  14   5   3   -6.40    4.50
  15  -5   3   18.80    8.70
 -15  -5  -3   35.50    7.60
  15   5   3   21.80    6.00
 -15   5  -3   17.30    7.10
  15   5   3   20.30    6.60
  16  -5   3   -3.20    8.10
 -16   5  -3  -12.30    7.50
  16   5   3   -8.00    5.90
  16   5   3    1.20    6.30
  15  -6  -3    4.20    7.10
 -15  -6   3   12.80    8.30
 -15   6   3    3.30    6.30
  15   6  -3   -3.30    6.00
  15   6  -3    6.60    5.20
 -14  -6   3    3.00    6.20
  14  -6  -3    6.60    6.00
  14  -6  -3    1.80    5.60
 -14   6   3   -2.10    5.40
  14   6  -3    2.80    5.50
  14   6  -3    1.80    4.60
  13  -6  -3    0.10    4.00
 -13  -6   3    5.80    5.10
  13  -6  -3   -2.30    4.90
 -13   6   3   -9.80    4.20
  13   6  -3   -0.10    3.80
  13   6  -3    1.40    4.30
  12  -6  -3    9.60    3.70
  12  -6  -3    9.70    5.00
 -12  -6   3    6.50    4.60
 -12   6   3    4.90    3.70
  12   6  -3    2.40    4.00
  12   6  -3    5.60    3.50
 -11  -6   3   45.90    4.80
  11  -6  -3   43.30    4.70
 -11  -6   3   57.49    6.30
 -11   6   3   52.79    6.10
  11   6  -3   39.00    5.30
  11   6  -3   34.80    4.70
 -10  -6   3   18.30    3.60
  10  -6  -3   16.00    3.10
  10   6  -3   17.70    3.20
 -10   6   3   12.00    3.10
  10   6  -3   11.00    2.10
  10   6  -3   18.30    3.90
   9  -6  -3   12.10    2.70
  -9  -6   3    9.60    3.20
  -9   6   3   11.30    2.90
   9   6  -3    9.50    1.90
   9   6  -3   13.80    2.60
   9   6  -3    9.50    3.00
  -8  -6   3    2.30    2.60
   8  -6  -3    1.20    2.00
   8   6  -3    6.90    2.20
   8   6  -3    4.20    1.60
  -8   6   3    3.00    2.20
   8   6  -3    2.90    2.40
  -7  -6   3    3.80    2.30
   7  -6  -3    4.40    1.80
  -7  -6   3    2.00    1.70
   7   6  -3    3.70    1.50
  -7   6   3    5.70    2.60
   7   6  -3    5.00    1.80
   7   6  -3    4.90    2.10
  -7   6   3    6.40    2.20
   6  -6  -3    9.60    2.20
  -6  -6   3   18.20    2.10
  -6  -6   3   19.00    2.80
   6  -6  -3   17.00    2.30
   6   6  -3   10.20    1.70
  -6   6   3   12.80    2.30
  -6   6   3   15.90    3.00
   6   6  -3   13.70    2.00
  -5  -6   3   24.00    2.80
  -5  -6   3   28.70    2.20
   5  -6  -3   30.00    2.80
   5  -6  -3   28.00    3.30
  -5   6   3   31.30    3.40
  -5   6   3   30.40    3.10
   5   6  -3   25.90    3.20
   5   6  -3   28.00    2.40
   5   6  -3   30.10    2.20
   4  -6  -3  125.79    6.10
  -4  -6   3  123.29    6.20
   4  -6  -3  124.49    5.90
   4  -6  -3  123.09    4.90
  -4  -6   3  123.29    6.50
   4  -6  -3  124.49    6.50
  -4  -6   3  127.89    5.30
   4   6  -3  129.19    5.60
  -4   6   3  128.59    4.90
   4   6  -3  125.19    6.30
  -4   6   3  120.59    6.00
  -4   6   3  126.79    6.20
   4   6  -3  125.99    5.30
  -4   6   3  127.69    6.50
   4   6  -3  121.29    6.30
  -3  -6   3    1.70    2.40
  -3  -6   3    2.50    1.00
   3  -6  -3    3.10    1.30
   3  -6  -3    1.00    0.80
   3  -6  -3    1.00    1.70
   3  -6  -3    0.70    1.30
  -3  -6   3    0.00    1.20
  -3   6   3    2.10    0.90
   3   6  -3    0.70    1.40
   3   6  -3    2.00    1.00
  -3   6   3    3.70    1.80
  -3   6   3    0.70    1.40
   3   6  -3    3.70    1.90
   3   6  -3    1.50    1.30
   2  -6  -3  855.71   32.30
  -2  -6   3  872.91   31.90
  -2  -6   3  883.51   32.70
   2  -6  -3  858.41   32.30
   2  -6  -3  892.71   32.60
   2  -6  -3  850.41   31.90
  -2  -6   3  829.72   32.10
   2   6  -3  863.81   32.70
  -2   6   3  887.01   31.80
  -2   6   3  869.41   32.30
   2   6  -3  842.02   32.00
  -2   6   3  841.82   32.50
   2   6  -3  862.51   32.10
   2   6  -3  892.11   32.40
  -2   6   3  857.01   32.70
   1  -6  -3    6.10    1.70
  -1  -6   3    4.40    1.50
  -1  -6   3    6.10    1.40
   1  -6  -3    3.40    1.20
   1  -6  -3    4.80    1.30
  -1  -6   3    7.30    1.40
  -1  -6   3    8.40    1.40
   1  -6  -3    5.40    1.40
   1   6  -3    5.30    1.40
  -1   6   3    3.90    1.30
   1   6  -3    5.70    1.60
   1   6  -3    6.20    1.20
   1   6  -3    7.60    1.70
  -1   6   3    6.20    1.30
  -1   6   3    5.20    1.50
   0  -6   3   19.60    2.00
   0  -6  -3   16.10    2.20
   0  -6  -3   16.80    2.20
   0  -6  -3   20.90    2.50
   0   6   3   15.80    2.00
   0   6   3   23.20    2.50
   0   6   3   19.80    2.00
   0   6  -3   25.10    2.10
   0   6  -3   14.30    1.90
   0   6  -3   18.80    2.00
   1  -6   3    1.40    1.40
  -1  -6  -3    4.90    1.50
   1  -6   3    0.90    1.20
   1  -6   3    5.10    1.30
  -1  -6  -3    5.10    1.40
   1  -6   3    4.10    1.10
  -1  -6  -3    4.10    1.40
  -1  -6  -3    2.20    1.50
  -1   6  -3    2.90    1.50
  -1   6  -3    2.10    1.30
   1   6   3    4.60    1.60
  -1   6  -3    3.30    1.40
   1   6   3    2.90    1.50
  -1   6  -3    0.90    1.10
   1   6   3    5.70    1.30
   2  -6   3   13.30    2.00
  -2  -6  -3   13.40    1.90
  -2  -6  -3   10.40    2.00
   2  -6   3   13.50    1.70
  -2  -6  -3   12.50    2.10
  -2  -6  -3   10.90    1.50
   2  -6   3   11.70    1.80
  -2   6  -3    9.50    1.90
  -2   6  -3    9.90    1.30
   2   6   3   13.50    1.60
   2   6   3   13.20    2.00
  -2   6  -3   14.70    2.20
  -2   6  -3   12.50    1.70
   2   6   3   15.70    2.20
   2   6   3    8.70    1.90
   3  -6   3    5.70    1.90
  -3  -6  -3   12.50    1.90
  -3  -6  -3    7.70    1.90
  -3  -6  -3   11.20    1.30
   3  -6   3    5.40    1.70
   3  -6   3    8.70    1.60
  -3  -6  -3   10.80    2.10
   3   6   3   10.30    1.90
  -3   6  -3    7.30    1.80
  -3   6  -3    7.10    0.80
   3   6   3    8.60    1.70
   3   6   3   10.80    2.30
  -3   6  -3    7.60    1.90
  -3   6  -3    6.20    1.50
   3   6   3   11.00    1.40
   4  -6   3  342.17   13.50
  -4  -6  -3  353.86   13.00
  -4  -6  -3  356.76   13.50
   4  -6   3  322.87   13.90
  -4  -6  -3  333.47   13.90
   4  -6   3  336.87   14.00
  -4   6  -3  337.77   14.00
   4   6   3  325.87   13.80
  -4   6  -3  331.07   13.50
   4   6   3  344.47   13.90
   4   6   3  352.76   13.00
  -5  -6  -3    1.70    1.00
  -5  -6  -3    1.70    1.80
   5  -6   3   -0.70    1.30
  -5  -6  -3    0.00    1.70
   5  -6   3    2.10    2.40
   5   6   3    2.90    1.70
  -5   6  -3    0.50    2.00
   5   6   3    2.40    1.00
  -5   6  -3    1.30    1.80
   5   6   3    1.00    1.70
  -6  -6  -3   97.89    5.80
   6  -6   3   99.79    5.00
  -6  -6  -3   88.89    5.10
  -6  -6  -3   97.09    4.20
  -6   6  -3   89.19    5.80
   6   6   3  103.29    5.20
   6   6   3   99.79    5.80
   6   6   3   95.09    4.20
  -7  -6  -3   24.80    3.50
  -7  -6  -3   36.50    4.00
  -7  -6  -3   30.40    2.10
   7  -6   3   36.30    3.20
  -7   6  -3   27.50    4.00
   7   6   3   38.40    4.10
   7   6   3   26.80    2.10
   7   6   3   29.70    3.30
   8  -6   3  406.86   16.80
  -8  -6  -3  380.16   14.60
   8  -6   3  403.46   15.70
  -8  -6  -3  386.96   16.70
   8   6   3  386.26   16.00
  -8   6  -3  378.66   16.60
   8   6   3  392.86   16.60
  -9  -6  -3   64.09    5.60
   9  -6   3   64.89    5.80
   9  -6   3   60.89    4.60
   9   6   3   70.29    5.00
  -9   6  -3   53.79    5.50
   9   6   3   56.09    5.60
 -10  -6  -3   34.70    5.00
  10  -6   3   25.70    4.40
  10  -6   3   23.70    3.20
 -10   6  -3   20.40    3.80
  10   6   3   28.60    3.80
  10   6   3   17.10    3.60
  11  -6   3    6.30    3.10
 -11  -6  -3    8.40    4.00
  11  -6   3    8.20    4.30
  11   6   3    5.60    3.30
 -11   6  -3    4.30    3.30
  11   6   3    3.50    3.20
 -12  -6  -3    8.90    4.70
  12  -6   3   22.90    3.70
  12   6   3   15.10    4.10
  12   6   3   16.80    5.80
 -12   6  -3   11.20    4.10
  13  -6   3   -6.40    4.10
  13  -6   3   -5.60    5.10
 -13  -6  -3    6.70    5.40
 -13   6  -3    1.50    5.00
  13   6   3   -1.80    3.80
  13   6   3    2.40    4.30
 -14  -6  -3    5.40    6.40
  14  -6   3    5.20    6.30
  14  -6   3   -0.30    5.10
  14   6   3    1.90    4.50
 -14   6  -3    1.20    5.20
  14   6   3    9.70    5.10
  15  -6   3    4.50    8.10
 -15  -6  -3    8.60    7.90
  15  -6   3    2.70    5.80
  15   6   3    8.70    6.20
  15   6   3    5.60    5.80
 -15   6  -3    5.30    6.40
  15  -7  -3   -1.70    8.30
 -15  -7   3   17.50    8.20
  15  -7  -3    9.40    5.90
  15   7  -3   11.20    5.50
 -15   7   3   17.40    7.60
  15   7  -3    7.60    7.10
  14  -7  -3   10.70    7.20
 -14  -7   3   14.30    7.50
 -14   7   3   13.70    6.20
  14   7  -3   11.20    5.70
  14   7  -3   15.70    5.00
 -13  -7   3    9.80    5.80
  13  -7  -3   20.20    6.60
  13  -7  -3   -2.30    4.30
  13   7  -3   10.50    4.90
 -13   7   3   11.60    6.30
  13   7  -3    5.30    4.00
  12  -7  -3   13.70    5.80
  12  -7  -3   16.20    4.00
 -12  -7   3   10.40    6.20
  12   7  -3   17.70    5.10
 -12   7   3    5.10    4.20
  12   7  -3   14.30    3.70
 -11  -7   3    5.80    2.90
 -11  -7   3    7.30    4.20
  11  -7  -3   17.10    3.60
 -11   7   3    1.90    3.40
  11   7  -3    9.00    3.10
  11   7  -3   11.70    4.00
 -10  -7   3   14.30    2.30
  10  -7  -3   14.40    3.10
 -10  -7   3   22.20    4.30
  10   7  -3   15.60    3.70
  10   7  -3   11.50    2.40
 -10   7   3   11.70    3.40
  10   7  -3   18.10    3.20
   9  -7  -3   17.50    3.00
  -9  -7   3   15.10    2.20
  -9  -7   3   15.80    3.60
   9   7  -3    7.20    2.10
  -9   7   3   12.10    3.10
   9   7  -3   13.30    3.50
   9   7  -3   14.40    2.80
  -8  -7   3   49.90    5.00
  -8  -7   3   54.99    3.90
  -8  -7   3   52.89    3.60
   8  -7  -3   59.09    4.40
   8   7  -3   47.80    5.00
  -8   7   3   48.40    4.90
   8   7  -3   55.49    4.00
   8   7  -3   49.00    3.70
  -7  -7   3    1.20    2.30
  -7  -7   3    3.80    1.60
  -7  -7   3    3.30    1.80
   7  -7  -3    2.30    1.90
   7   7  -3    0.20    1.80
  -7   7   3    0.60    2.20
  -7   7   3    2.60    2.60
   7   7  -3    1.40    1.90
   7   7  -3    2.30    2.20
  -6  -7   3   59.79    4.60
  -6  -7   3   68.49    3.70
  -6  -7   3   68.99    3.80
   6  -7  -3   60.59    4.30
   6   7  -3   64.69    3.70
  -6   7   3   66.99    5.20
   6   7  -3   60.29    3.80
  -6   7   3   74.59    4.90
   6   7  -3   60.89    4.90
  -5  -7   3    0.90    1.30
   5  -7  -3    1.20    1.90
  -5  -7   3   -0.10    1.40
  -5  -7   3   -2.90    1.80
   5  -7  -3    2.40    1.60
   5   7  -3   -1.10    1.70
  -5   7   3   -0.50    2.00
  -5   7   3    3.60    1.70
   5   7  -3    0.40    1.50
   5   7  -3   -0.70    1.20
  -4  -7   3   13.70    2.00
   4  -7  -3   14.30    1.30
   4  -7  -3   11.10    2.10
  -4  -7   3   15.30    1.90
  -4  -7   3   16.30    2.60
   4  -7  -3   15.10    2.30
   4   7  -3   12.00    1.80
  -4   7   3   12.90    2.70
  -4   7   3   13.90    1.40
   4   7  -3   13.50    1.80
  -4   7   3   10.40    2.00
   4   7  -3   16.50    2.60
   3  -7  -3   39.20    3.70
  -3  -7   3   54.19    2.80
   3  -7  -3   42.30    2.50
   3  -7  -3   39.20    3.40
  -3  -7   3   50.79    3.10
   3  -7  -3   45.90    3.40
  -3  -7   3   49.90    3.50
   3   7  -3   53.99    2.80
   3   7  -3   55.19    3.30
  -3   7   3   40.40    3.00
  -3   7   3   44.50    3.60
   3   7  -3   59.19    3.90
   3   7  -3   51.59    3.90
  -3   7   3   43.00    3.80
  -2  -7   3  119.19    5.20
   2  -7  -3  119.59    6.10
   2  -7  -3  117.09    5.20
  -2  -7   3  119.09    5.80
   2  -7  -3  120.09    5.80
  -2  -7   3  122.29    5.50
  -2  -7   3  111.69    6.10
   2  -7  -3  120.59    5.70
  -2   7   3  123.29    5.20
   2   7  -3  119.39    5.30
  -2   7   3  117.89    5.70
  -2   7   3  116.59    6.10
   2   7  -3  123.99    6.20
   2   7  -3  112.49    5.60
  -2   7   3  121.39    6.00
   2   7  -3  118.89    5.80
  -1  -7   3    1.40    1.30
  -1  -7   3    2.70    1.70
   1  -7  -3    2.10    1.50
  -1  -7   3    2.90    1.30
   1  -7  -3    2.60    1.60
   1  -7  -3    4.00    1.30
   1  -7  -3    2.80    1.50
  -1   7   3    3.00    1.60
   1   7  -3    1.60    1.50
  -1   7   3    2.30    1.50
   1   7  -3    3.80    1.30
  -1   7   3    1.50    1.30
  -1   7   3    2.60    1.50
   1   7  -3    2.60    1.70
   1   7  -3    2.00    1.50
   0  -7   3   95.29    4.70
   0  -7  -3   93.69    4.90
   0  -7  -3   93.19    4.70
   0  -7  -3   91.89    4.80
   0  -7  -3   84.49    4.60
   0  -7   3   90.59    5.10
   0  -7   3   96.49    4.60
   0  -7   3   88.39    4.40
   0   7   3   90.69    5.00
   0   7   3   88.09    4.70
   0   7  -3   91.99    4.60
   0   7   3   94.79    5.00
   0   7   3   96.89    4.60
   0   7  -3   95.89    5.20
   0   7  -3   96.19    4.60
   0   7  -3   91.29    4.70
  -1  -7  -3   11.80    2.00
  -1  -7  -3    9.60    1.90
   1  -7   3    9.80    1.40
  -1  -7  -3   13.30    2.10
  -1  -7  -3    7.20    1.60
   1  -7   3    6.10    1.80
   1  -7   3    9.00    1.70
   1  -7   3   11.30    2.00
  -1   7  -3   10.20    2.00
   1   7   3    9.90    2.10
   1   7   3   11.50    2.00
  -1   7  -3    7.40    1.80
   1   7   3   12.70    1.90
  -1   7  -3    9.00    1.50
  -1   7  -3    9.20    2.00
   1   7   3   10.40    2.00
   2  -7   3  109.19    5.90
  -2  -7  -3  120.49    6.20
  -2  -7  -3  127.19    5.80
   2  -7   3  110.49    6.00
  -2  -7  -3  123.49    5.50
   2  -7   3  120.29    5.00
  -2  -7  -3  123.89    6.00
   2  -7   3  121.19    5.70
  -2   7  -3  122.99    6.20
  -2   7  -3  121.69    6.00
   2   7   3  116.29    6.30
   2   7   3  128.49    5.60
   2   7   3  120.19    6.00
  -2   7  -3  110.69    5.00
   2   7   3  124.99    5.80
  -2   7  -3  113.09    5.80
  -3  -7  -3   -0.60    1.70
   3  -7   3    1.70    1.40
  -3  -7  -3    0.10    1.40
   3  -7   3    0.80    2.00
   3  -7   3    1.50    1.90
  -3  -7  -3    1.50    1.90
  -3  -7  -3    1.60    1.70
  -3   7  -3   -0.40    0.60
  -3   7  -3    1.30    1.90
   3   7   3   -1.80    1.50
  -3   7  -3   -2.90    1.70
   3   7   3    1.40    1.70
   3   7   3    0.30    1.60
   3   7   3    1.90    1.30
  -4  -7  -3  151.58    7.40
  -4  -7  -3  154.88    6.90
   4  -7   3  139.19    7.50
   4  -7   3  145.29    6.90
   4   7   3  149.09    7.40
  -4   7  -3  143.19    7.40
   4   7   3  158.78    6.50
   4   7   3  155.78    7.00
  -5  -7  -3   39.50    2.80
  -5  -7  -3   43.00    3.70
  -5  -7  -3   35.10    3.50
   5   7   3   44.20    3.50
   5   7   3   39.80    2.80
  -5   7  -3   49.50    4.10
   5   7   3   51.99    4.10
   6  -7   3  258.27   11.00
  -6  -7  -3  248.68   10.90
  -6  -7  -3  267.37   10.30
  -6  -7  -3  249.88   11.50
   6   7   3  265.57   11.70
  -6   7  -3  253.07   11.70
   6   7   3  264.47   11.10
   6   7   3  267.57   10.30
  -7  -7  -3   12.10    1.70
   7  -7   3   19.20    2.60
  -7  -7  -3    7.50    2.70
  -7  -7  -3   11.00    2.90
   7   7   3   11.10    2.70
   7   7   3   18.60    2.90
  -7   7  -3   13.70    3.10
   7   7   3    9.00    1.60
  -8  -7  -3   12.10    3.20
  -8  -7  -3   14.80    1.70
   8  -7   3   15.30    2.70
   8   7   3   10.90    1.60
  -8   7  -3   11.20    3.10
   8   7   3   16.20    2.90
   8   7   3    8.70    2.80
  -9  -7  -3   36.10    4.90
   9  -7   3   38.50    4.40
  -9  -7  -3   41.50    2.60
   9  -7   3   36.20    5.30
  -9   7  -3   37.10    5.00
   9   7   3   38.80    2.70
   9   7   3   45.80    5.50
   9   7   3   36.10    4.20
 -10  -7  -3   12.40    4.20
  10  -7   3   12.50    3.20
  10  -7   3   13.10    4.40
  10   7   3   15.80    3.50
  10   7   3   19.90    4.10
 -10   7  -3   11.70    3.60
 -11  -7  -3   35.50    5.90
  11  -7   3   23.90    5.20
  11  -7   3   26.10    4.20
 -11   7  -3   27.00    4.90
  11   7   3   34.70    4.70
  11   7   3   24.20    4.90
 -12  -7  -3   23.70    5.90
  12  -7   3   37.40    6.70
  12  -7   3   29.10    4.80
  12   7   3   28.60    5.00
  12   7   3   30.40    5.60
 -12   7  -3   24.30    6.90
 -13  -7  -3   10.60    5.20
  13  -7   3    1.80    5.20
  13  -7   3    3.50    5.70
  13   7   3   11.30    5.40
  13   7   3   -0.20    4.50
 -13   7  -3    0.00    4.60
 -14  -7  -3    4.60    7.10
  14  -7   3   -2.20    6.20
  14  -7   3   17.30    8.20
  14   7   3   17.50    6.90
  14   7   3    6.40    4.90
 -14   7  -3   20.80    7.00
  15  -7   3   -1.80    7.60
 -15  -7  -3    2.80    7.90
 -15   7  -3    7.00    6.80
  15   7   3    5.80    6.70
  15   7   3    6.30    5.70
 -14  -8   3   10.00    7.30
  14  -8  -3    6.30    7.70
  14  -8  -3    1.70    5.30
  14   8  -3    4.30    5.60
 -14   8   3    7.50    6.20
 -13  -8   3   41.70    7.70
  13  -8  -3   24.50    6.00
  13  -8  -3   29.00    7.90
  13   8  -3   26.40    4.60
  13   8  -3   29.80    6.20
 -13   8   3   35.10    6.60
 -12  -8   3   -1.70    5.00
  12  -8  -3    1.40    4.30
  12   8  -3    1.10    4.50
  12   8  -3    3.80    3.30
 -12   8   3   -6.60    4.30
 -11  -8   3    1.40    2.40
  11  -8  -3    2.20    3.70
  11   8  -3    6.50    3.00
 -11   8   3   -4.10    3.70
 -10  -8   3    0.70    3.90
  10  -8  -3    1.50    3.30
 -10  -8   3    2.10    2.20
  10   8  -3    1.30    3.50
  10   8  -3   -0.60    2.70
 -10   8   3   -1.20    3.10
  -9  -8   3    2.80    1.90
   9  -8  -3    0.30    2.70
  -9  -8   3    0.80    3.50
   9   8  -3    1.90    2.50
  -9   8   3    1.60    3.00
   9   8  -3    1.50    3.10
   9   8  -3   -1.10    2.40
  -8  -8   3    1.40    1.70
   8  -8  -3    2.40    2.60
  -8  -8   3    7.30    2.50
  -8  -8   3    3.10    2.90
   8   8  -3    5.00    2.20
  -8   8   3    7.50    2.90
   8   8  -3    2.90    2.90
   8   8  -3    7.90    2.50
  -7  -8   3    8.20    2.10
  -7  -8   3    5.60    2.90
   7  -8  -3    6.60    2.40
  -7  -8   3    9.60    1.90
  -7   8   3    6.50    2.70
   7   8  -3    8.70    2.30
   7   8  -3   11.40    3.00
  -7   8   3   12.00    3.90
  -6  -8   3   -2.60    1.70
   6  -8  -3   -0.50    2.00
  -6  -8   3   -0.20    2.20
  -6  -8   3   -0.50    1.50
   6   8  -3   -3.60    2.20
  -6   8   3   -0.30    2.70
   6   8  -3   -3.30    1.50
   6   8  -3    2.40    1.90
  -6   8   3   -0.20    2.10
  -5  -8   3   81.69    5.50
  -5  -8   3   88.59    4.20
   5  -8  -3   87.99    5.10
  -5  -8   3   84.09    4.50
  -5   8   3   77.89    5.80
   5   8  -3   82.39    4.70
   5   8  -3   79.69    5.60
  -5   8   3   86.99    5.40
   5   8  -3   83.59    4.30
   4  -8  -3    9.10    2.10
  -4  -8   3    9.60    1.80
  -4  -8   3   10.90    2.50
  -4  -8   3    8.10    1.80
   4  -8  -3    7.90    1.20
  -4   8   3    6.90    1.30
  -4   8   3   11.60    2.70
   4   8  -3    7.30    1.90
   4   8  -3   10.70    1.70
  -4   8   3    8.00    2.20
   4   8  -3   11.00    2.50
   3  -8  -3    1.10    1.10
   3  -8  -3   -1.30    1.70
  -3  -8   3    0.90    1.40
  -3  -8   3    0.40    1.70
  -3  -8   3    1.00    1.40
   3  -8  -3    1.40    1.70
   3   8  -3    3.40    2.60
  -3   8   3    0.30    1.70
   3   8  -3    4.20    1.80
   3   8  -3    0.80    1.30
  -3   8   3    1.10    1.20
   3   8  -3    0.00    1.80
  -3   8   3   -1.20    2.00
  -2  -8   3    2.10    1.40
   2  -8  -3    0.10    1.30
  -2  -8   3    3.00    1.50
   2  -8  -3    1.70    1.60
   2  -8  -3    2.40    1.80
   2  -8  -3    1.80    2.00
  -2  -8   3    2.10    1.60
   2   8  -3    3.40    1.40
   2   8  -3    3.30    2.00
  -2   8   3    2.20    1.40
   2   8  -3    1.60    1.80
  -2   8   3    0.70    2.00
  -2   8   3    0.70    1.70
   2   8  -3    0.50    3.10
   1  -8  -3   16.00    2.30
   1  -8  -3   21.40    3.00
  -1  -8   3   18.70    2.40
  -1  -8   3   19.20    2.50
   1  -8  -3   20.20    2.90
  -1  -8   3   19.00    2.50
   1  -8  -3   17.10    2.20
  -1   8   3   20.40    2.90
   1   8  -3   24.30    2.90
   1   8  -3   15.40    2.20
  -1   8   3   20.30    2.90
   1   8  -3   15.40    2.40
  -1   8   3   21.20    2.40
   0  -8  -3   12.10    2.00
   0  -8   3   15.50    2.20
   0  -8  -3   18.10    2.50
   0  -8   3   16.20    2.10
   0  -8   3   14.00    2.00
   0  -8  -3   14.60    2.20
   0  -8  -3   12.80    2.20
   0   8   3   16.60    2.90
   0   8  -3    9.10    2.00
   0   8   3   12.10    2.30
   0   8  -3   17.00    2.20
   0   8   3   17.20    2.40
   0   8   3   18.00    2.50
   0   8  -3   17.20    2.30
   1  -8   3   64.29    3.60
  -1  -8  -3   67.99    4.20
  -1  -8  -3   75.29    4.30
  -1  -8  -3   65.79    4.00
   1  -8   3   67.09    4.20
   1  -8   3   67.49    4.00
  -1  -8  -3   72.89    4.70
   1   8   3   69.09    4.50
   1   8   3   66.39    4.10
  -1   8  -3   70.59    4.70
  -1   8  -3   67.99    4.30
   1   8   3   68.79    4.10
  -1   8  -3   72.59    3.70
   1   8   3   75.09    4.70
   2  -8   3   -0.50    1.80
  -2  -8  -3    1.30    1.90
   2  -8   3    0.20    1.00
  -2  -8  -3   -0.60    1.30
  -2  -8  -3   -0.10    1.80
   2  -8   3   -2.50    1.40
  -2   8  -3    0.50    1.10
   2   8   3    1.20    1.50
  -2   8  -3    3.20    2.00
   2   8   3   -0.30    1.70
  -2   8  -3   -0.30    1.80
   2   8   3   -0.50    1.90
   2   8   3   -0.50    1.80
   3  -8   3   16.70    2.30
  -3  -8  -3   23.60    2.90
  -3  -8  -3   18.40    2.90
   3  -8   3   26.70    3.40
  -3  -8  -3   18.20    2.30
   3   8   3   19.00    2.70
   3   8   3   17.80    2.70
   3   8   3   16.20    2.10
  -3   8  -3   18.10    1.60
  -3   8  -3   16.20    2.70
  -3   8  -3   17.00    2.80
  -4  -8  -3   20.10    2.40
  -4  -8  -3   17.00    2.80
   4  -8   3   18.60    2.50
  -4  -8  -3   16.70    2.60
  -4   8  -3   15.00    2.80
   4   8   3   18.10    2.20
  -4   8  -3   14.90    2.90
   4   8   3   17.40    2.90
   4   8   3   23.30    2.90
  -5  -8  -3  139.19    7.10
  -5  -8  -3  150.18    7.70
  -5  -8  -3  143.69    6.50
   5  -8   3  147.89    7.20
   5   8   3  141.69    6.60
  -5   8  -3  146.19    7.80
   5   8   3  149.88    7.90
   5   8   3  150.38    7.20
  -6  -8  -3    0.50    2.40
  -6  -8  -3    7.00    2.70
   6  -8   3   10.30    2.40
  -6  -8  -3    5.20    1.70
   6   8   3    7.10    1.80
   6   8   3    3.30    2.50
   6   8   3    6.00    2.30
  -6   8  -3    2.30    2.40
  -7  -8  -3   79.99    6.20
   7  -8   3   82.39    5.30
   7   8   3   78.39    5.20
   7   8   3   68.29    4.20
  -7   8  -3   72.09    6.00
   7   8   3   87.89    6.10
   8  -8   3   19.30    3.20
  -8  -8  -3   24.90    4.50
  -8  -8  -3   20.90    2.30
   8   8   3   23.00    3.80
   8   8   3   27.10    3.60
   8   8   3   18.20    2.20
  -8   8  -3   19.70    3.90
  -9  -8  -3    7.00    1.70
   9  -8   3    7.60    4.00
   9  -8   3   12.40    3.10
  -9  -8  -3    5.40    4.00
  -9   8  -3    4.50    3.30
   9   8   3   14.10    3.70
   9   8   3    9.50    3.00
   9   8   3    7.30    1.80
  10  -8   3    9.20    3.30
  10  -8   3    6.80    4.40
 -10  -8  -3   11.40    4.60
 -10  -8  -3    9.10    1.90
  10   8   3    7.80    3.50
 -10   8  -3    4.50    3.60
  10   8   3    8.90    3.30
  11  -8   3    1.90    3.40
 -11  -8  -3    1.40    5.00
  11   8   3    2.00    3.40
 -11   8  -3    4.40    4.00
  12  -8   3    2.60    5.80
 -12  -8  -3    2.20    5.60
  12  -8   3    2.00    4.60
  12   8   3    4.50    3.90
 -12   8  -3   -2.00    4.30
  12   8   3    2.10    4.80
  13  -8   3    4.60    5.20
 -13  -8  -3    5.40    6.50
  13  -8   3    5.60    6.30
  13   8   3    9.30    5.20
 -13   8  -3    5.50    5.20
  13   8   3   12.50    5.90
  14  -8   3   14.90    9.20
 -14  -8  -3   15.50    8.10
  14   8   3   10.60    6.80
  14   8   3   19.80    7.30
  14  -9  -3   -1.40    8.30
  14  -9  -3    7.10    6.50
 -14  -9   3   19.20    8.80
  14   9  -3   -3.10    6.40
 -14   9   3    4.70    7.50
  13  -9  -3   12.80    7.30
 -13  -9   3   14.10    7.60
  13  -9  -3   13.90    5.50
 -13   9   3   12.30    6.20
  13   9  -3   13.90    5.90
 -12  -9   3    5.10    5.90
  12  -9  -3   -3.20    4.50
 -12   9   3   -0.20    4.90
  12   9  -3   -1.10    3.70
  12   9  -3   -5.60    4.80
 -11  -9   3   -1.50    4.80
 -11  -9   3   -1.50    2.60
  11  -9  -3    3.80    4.80
  11   9  -3    3.90    3.20
  11   9  -3   -1.10    4.50
 -11   9   3   -8.20    3.80
 -10  -9   3    0.30    6.70
  10  -9  -3    1.60    3.80
 -10  -9   3    2.60    2.50
  10   9  -3    7.50    3.00
 -10   9   3    1.10    3.60
  10   9  -3   -4.80    5.10
  -9  -9   3    1.40    2.10
  -9  -9   3    5.90    3.80
   9  -9  -3   -3.50    3.00
  -9   9   3   -4.10    3.10
   9   9  -3    0.00    2.40
   9   9  -3    1.30    3.60
  -8  -9   3    5.20    3.50
  -8  -9   3    2.00    2.00
   8  -9  -3    0.90    2.70
   8   9  -3    0.60    2.40
   8   9  -3   -3.90    3.10
  -8   9   3    3.80    3.20
  -7  -9   3   36.20    3.50
  -7  -9   3   29.90    3.30
  -7  -9   3   37.90    4.80
   7  -9  -3   32.30    3.90
  -7   9   3   25.10    3.80
   7   9  -3   25.60    3.90
  -7   9   3   33.20    5.20
   6  -9  -3    7.60    2.70
  -6  -9   3    8.20    2.00
  -6  -9   3    8.20    2.30
  -6  -9   3    9.50    3.10
   6   9  -3   11.10    3.00
  -6   9   3   10.90    3.80
  -6   9   3    7.10    2.80
   6   9  -3   11.00    2.40
  -5  -9   3   13.30    2.20
  -5  -9   3    8.80    2.70
  -5  -9   3   15.70    2.30
   5  -9  -3   10.60    2.60
   5   9  -3   14.80    2.30
  -5   9   3   18.00    3.90
   5   9  -3   12.10    3.20
  -5   9   3   10.40    2.80
   4  -9  -3   34.10    2.20
   4  -9  -3   31.50    3.80
  -4  -9   3   37.40    3.00
  -4  -9   3   30.40    3.90
  -4  -9   3   36.10    3.20
   4   9  -3   31.80    2.90
  -4   9   3   36.90    4.20
  -4   9   3   29.30    4.00
   4   9  -3   39.60    4.40
   3  -9  -3    3.20    2.00
  -3  -9   3   -0.30    2.00
   3  -9  -3    0.50    1.30
  -3  -9   3    0.80    1.70
  -3  -9   3    0.50    1.70
  -3   9   3   -0.70    1.60
   3   9  -3   -1.70    2.20
  -3   9   3    0.10    2.30
   3   9  -3    3.30    1.60
  -3   9   3   -1.10    1.90
   2  -9  -3   21.10    2.50
  -2  -9   3   27.20    3.10
  -2  -9   3   23.60    2.90
   2  -9  -3   21.40    2.80
  -2  -9   3   20.40    2.60
   2   9  -3   24.60    3.60
  -2   9   3   22.20    3.40
   2   9  -3   19.20    3.10
  -2   9   3   22.00    2.70
  -2   9   3   25.70    3.20
   2   9  -3   19.70    2.70
   1  -9  -3    1.20    1.80
  -1  -9   3    4.60    1.80
  -1  -9   3    2.60    1.70
  -1  -9   3    3.20    1.80
   1   9  -3    2.30    2.10
  -1   9   3    5.10    1.90
  -1   9   3    5.20    2.00
   1   9  -3    2.30    2.20
  -1   9   3    3.50    2.20
   0  -9  -3    0.10    1.80
   0  -9   3    3.10    1.70
   0  -9   3    0.00    1.60
   0  -9  -3    0.10    1.70
   0  -9   3    3.40    1.90
   0  -9  -3   -3.00    2.20
   0   9   3    4.20    2.10
   0   9  -3   -2.40    1.80
   0   9  -3   -3.40    1.80
   0   9   3    0.00    2.00
   0   9  -3    7.20    2.00
   0   9   3    2.00    1.90
  -1  -9  -3   77.99    4.90
   1  -9   3   81.89    5.00
   1  -9   3   80.99    4.30
  -1  -9  -3   83.19    4.70
  -1  -9  -3   91.09    5.10
   1  -9   3   78.69    4.80
   1   9   3   78.09    4.90
   1   9   3   80.59    5.40
  -1   9  -3   82.49    4.40
   1   9   3   84.79    5.20
  -1   9  -3   77.79    5.00
  -1   9  -3   79.99    5.50
  -2  -9  -3    2.10    2.10
  -2  -9  -3    2.00    1.50
   2  -9   3    3.00    1.30
  -2  -9  -3    2.30    2.20
   2  -9   3    1.40    2.20
   2  -9   3    3.00    1.80
   2   9   3    0.20    2.20
  -2   9  -3    5.70    1.60
   2   9   3    1.20    2.20
  -2   9  -3    2.40    2.20
  -2   9  -3    3.60    2.20
  -3  -9  -3  266.37   11.00
  -3  -9  -3  253.47   11.20
   3  -9   3  264.07   11.30
  -3  -9  -3  269.37   11.70
  -3   9  -3  261.17   11.80
   3   9   3  275.47   12.00
  -3   9  -3  259.97   12.10
   3   9   3  268.87   11.50
   4  -9   3   10.40    2.30
  -4  -9  -3    4.80    2.50
  -4  -9  -3    8.90    2.80
   4   9   3    2.80    2.10
  -4   9  -3    7.90    2.70
   4   9   3    6.30    2.40
   4   9   3    2.20    2.40
  -4   9  -3   10.50    3.00
  -5  -9  -3  154.28    6.90
  -5  -9  -3  140.29    7.50
  -5  -9  -3  162.98    8.40
   5  -9   3  144.09    7.80
   5   9   3  167.08    7.80
   5   9   3  148.09    7.20
   5   9   3  149.49    8.40
  -5   9  -3  156.18    8.40
   6  -9   3   26.20    3.30
  -6  -9  -3   25.60    2.80
  -6  -9  -3   28.10    4.00
  -6   9  -3   24.40    3.80
   6   9   3   32.60    3.40
   6   9   3   28.50    3.80
   6   9   3   28.30    4.10
  -7  -9  -3    8.90    1.90
   7  -9   3   13.10    3.10
  -7  -9  -3   10.70    3.90
   7   9   3   15.50    3.20
   7   9   3   11.70    2.30
   7   9   3   10.70    3.60
  -7   9  -3   10.10    3.50
  -8  -9  -3    3.10    3.30
  -8  -9  -3    0.70    1.80
  -8   9  -3    4.20    3.30
   8   9   3   -1.30    3.00
   8   9   3   -1.40    2.70
   9  -9   3    8.50    3.50
  -9  -9  -3    5.30    4.20
  -9  -9  -3    8.20    2.70
   9   9   3   11.20    3.90
  -9   9  -3    6.40    3.90
   9   9   3    6.40    3.30
  10  -9   3    0.50    3.20
 -10  -9  -3   -2.10    6.10
  10  -9   3    3.50    5.40
 -10   9  -3    1.60    3.90
  10   9   3    6.50    3.50
  10   9   3   10.40    6.00
  11  -9   3    4.90    5.40
  11  -9   3   10.30    4.20
 -11  -9  -3    5.50    5.50
  11   9   3    1.60    4.40
 -11   9  -3    0.30    4.30
  11   9   3   11.30    4.20
 -12  -9  -3    9.70    6.30
  12  -9   3   -7.50    6.00
  12  -9   3    3.90    5.30
  12   9   3    7.40    4.20
  12   9   3   -0.70    4.60
 -12   9  -3    2.50    4.90
  13  -9   3   80.49   11.00
 -13  -9  -3   75.79   10.50
  13   9   3   68.79    8.70
 -13   9  -3   47.00    7.70
  13   9   3   63.89    7.70
  14   9   3    5.00    7.00
 -14   9  -3  -13.80    6.20
  13 -10  -3    2.60    7.50
  13 -10  -3   16.90    9.70
 -13 -10   3    7.10    8.10
  13  10  -3    9.90    6.00
 -13  10   3    1.00    6.50
  12 -10  -3    2.20    5.30
 -12 -10   3   11.50    7.10
 -12  10   3    5.00    5.20
  12  10  -3   11.30    6.20
 -11 -10   3   10.70    5.90
  11 -10  -3    7.10    4.70
  11  10  -3   10.60    5.50
  11  10  -3   13.90    4.90
 -10 -10   3    4.30    5.10
 -10 -10   3    3.50    2.60
  10 -10  -3    4.30    4.90
  10  10  -3    5.20    3.20
  10  10  -3   -1.60    4.20
 -10  10   3    9.50    4.40
  -9 -10   3   18.90    7.00
   9 -10  -3   11.00    4.30
  -9 -10   3   17.20    2.90
  -9  10   3    8.20    4.10
   9  10  -3   13.80    3.10
  -8 -10   3    3.10    2.20
   8 -10  -3    1.80    3.50
  -8 -10   3    7.20    4.10
  -8  10   3    4.80    3.50
   8  10  -3    4.40    3.80
   8  10  -3    6.10    2.60
  -7 -10   3    2.70    2.20
  -7 -10   3    6.90    3.20
   7 -10  -3    2.70    3.00
   7  10  -3    8.40    2.60
  -7  10   3    1.60    3.20
  -7  10   3    6.30    4.30
   7  10  -3    7.70    3.50
  -6 -10   3   13.60    2.50
  -6 -10   3   12.90    2.60
  -6 -10   3   15.00    3.80
   6 -10  -3   12.10    3.30
   6  10  -3    7.10    3.40
  -6  10   3    8.80    3.90
  -6  10   3    8.30    3.00
  -5 -10   3    1.30    2.20
   5 -10  -3    5.00    2.80
  -5 -10   3    1.90    1.90
  -5 -10   3    5.10    3.00
  -5  10   3    2.10    2.60
   5  10  -3    3.20    3.10
  -5  10   3   -1.40    2.90
  -4 -10   3    3.90    1.90
  -4 -10   3   10.50    2.90
   4 -10  -3    7.10    1.40
   4 -10  -3    7.70    2.70
  -4 -10   3    3.10    2.10
   4  10  -3    4.20    2.90
  -4  10   3    6.60    3.20
  -4  10   3    7.30    2.90
  -3 -10   3   -0.30    1.80
  -3 -10   3    1.20    2.30
   3 -10  -3    2.20    1.50
   3 -10  -3    2.00    2.30
  -3 -10   3    3.10    2.10
  -3  10   3    2.10    2.90
  -3  10   3   -0.20    1.90
   3  10  -3   -0.10    2.40
  -3  10   3   -0.20    2.30
  -2 -10   3   31.00    3.60
  -2 -10   3   32.90    3.20
   2 -10  -3   32.20    3.70
  -2 -10   3   28.40    3.30
   2  10  -3   30.00    3.50
   2  10  -3   36.60    4.30
  -2  10   3   33.20    4.20
  -2  10   3   33.30    4.40
  -2  10   3   33.10    3.30
  -1 -10   3   13.70    2.50
   1 -10  -3   13.10    2.60
   1 -10  -3   14.00    2.50
   1  10  -3   16.20    2.90
  -1  10   3   14.80    2.90
  -1  10   3   16.10    3.20
  -1  10   3   15.30    2.70
   0 -10  -3   71.29    4.80
   0 -10  -3   73.99    4.80
   0 -10   3   72.89    4.70
   0 -10   3   68.29    4.50
   0 -10   3   73.09    4.80
   0  10   3   69.89    4.90
   0  10  -3   76.49    4.80
   0  10   3   71.59    5.50
   0  10  -3   73.99    5.60
   0  10   3   75.69    5.40
   0  10  -3   73.19    4.90
  -1 -10  -3   49.90    4.00
   1 -10   3   54.89    4.20
   1 -10   3   43.20    4.40
   1 -10   3   45.10    3.90
  -1 -10  -3   49.60    4.30
  -1  10  -3   45.90    4.30
  -1  10  -3   52.89    4.90
   1  10   3   46.90    4.80
   1  10   3   49.40    4.50
  -1  10  -3   52.49    3.80
   2 -10   3  314.77   12.60
  -2 -10  -3  326.57   13.80
  -2 -10  -3  307.87   13.20
   2 -10   3  331.57   13.50
  -2  10  -3  315.77   14.30
   2  10   3  327.17   14.20
  -2  10  -3  312.37   13.70
  -2  10  -3  330.67   12.60
   2  10   3  311.17   13.70
  -3 -10  -3   11.90    2.30
  -3 -10  -3    8.80    3.00
   3 -10   3   11.90    2.60
  -3  10  -3    8.10    2.90
   3  10   3   14.30    3.00
  -3  10  -3   11.70    1.80
  -3  10  -3   10.50    3.00
   3  10   3   13.80    3.10
  -4 -10  -3   17.30    3.50
  -4 -10  -3   17.00    2.40
   4 -10   3   15.30    2.90
  -4  10  -3   12.30    3.20
   4  10   3   22.30    3.60
   4  10   3   18.00    3.10
  -4  10  -3   15.70    3.50
  -5 -10  -3   43.10    3.60
  -5 -10  -3   45.00    5.20
   5 -10   3   35.10    4.60
   5  10   3   54.99    4.60
   5  10   3   53.49    5.60
  -5  10  -3   49.99    5.50
  -6 -10  -3    0.10    3.20
   6 -10   3    3.30    2.70
  -6 -10  -3    0.40    1.70
  -6  10  -3   -0.70    2.90
   6  10   3   -0.20    2.60
   6  10   3    5.00    3.20
  -7 -10  -3   10.00    2.30
  -7 -10  -3   17.20    4.40
   7 -10   3   10.60    3.60
  -7  10  -3   10.40    3.70
   7  10   3    5.90    3.40
   7  10   3   12.70    3.30
  -8 -10  -3   13.90    2.50
  -8 -10  -3   20.10    4.80
   8 -10   3   12.60    4.00
   8  10   3   23.70    4.00
   8  10   3   15.60    4.40
  -8  10  -3   11.40    4.10
  -9 -10  -3   -4.90    2.00
   9 -10   3   -1.50    4.00
  -9 -10  -3    7.60    8.10
   9  10   3    5.40    3.60
  -9  10  -3   -2.50    3.80
   9  10   3   -1.40    4.20
  10 -10   3    6.50    5.80
 -10 -10  -3    6.10    5.10
 -10  10  -3    2.80    4.60
  10  10   3    6.00    4.80
  10  10   3   10.80    3.90
  11 -10   3    4.90    6.60
  11 -10   3    4.50    4.90
 -11 -10  -3    3.70    5.90
 -11  10  -3    7.70    5.30
  11  10   3   -5.20    4.70
  11  10   3   12.90    4.60
  12 -10   3    3.40    5.50
 -12 -10  -3    8.50    7.00
  12 -10   3    8.30    7.40
 -12  10  -3   -1.90    5.60
  12  10   3   -2.40    5.60
  12  10   3   10.60    5.00
 -13 -10  -3    5.50    8.80
  13 -10   3   -8.50    6.60
  13 -10   3    8.50    9.20
  13  10   3    2.90    6.90
  13  10   3    8.90    5.70
 -13  10  -3   -6.50    6.50
  12 -11  -3    3.20    6.00
 -12 -11   3    6.40    7.70
 -12  11   3    5.20    6.20
  12  11  -3   -5.50    7.00
 -11 -11   3    4.00    7.00
  11 -11  -3    2.90    5.50
 -11  11   3   -2.70    5.10
  11  11  -3    0.00    6.20
 -10 -11   3    1.20    5.50
  10 -11  -3   -1.80    4.80
 -10 -11   3    5.30    3.20
  10  11  -3   -2.60    4.90
   9 -11  -3    0.60    4.80
  -9 -11   3    4.30    2.90
  -9 -11   3    6.70    5.40
   9  11  -3   11.20    3.40
   9  11  -3    2.20    5.10
  -9  11   3    9.60    4.60
  -8 -11   3   -1.30    2.40
  -8 -11   3    3.50    5.20
   8  11  -3   -2.50    6.00
   8  11  -3    1.80    2.70
  -8  11   3   -2.20    3.90
  -7 -11   3    2.50    3.90
  -7 -11   3   -1.60    2.30
   7 -11  -3   -2.00    3.50
  -7  11   3    0.40    4.70
   7  11  -3    3.80    2.70
   7  11  -3    0.70    3.90
  -7  11   3    0.20    3.70
  -6 -11   3    3.20    3.50
   6 -11  -3   -1.90    3.20
  -6 -11   3    1.10    2.10
  -6  11   3   -2.60    3.10
  -6  11   3    0.20    3.90
   6  11  -3   -2.00    3.20
   6  11  -3   -2.80    2.50
   5 -11  -3    2.50    3.10
  -5 -11   3    1.20    2.20
  -5 -11   3    7.50    3.30
   5  11  -3   -6.80    3.00
   5  11  -3    0.50    2.40
  -5  11   3   -3.10    3.00
  -5  11   3    0.30    3.80
   4 -11  -3   22.50    3.80
  -4 -11   3   20.90    3.00
  -4 -11   3   19.70    2.90
  -4 -11   3   21.80    3.90
   4 -11  -3   15.60    2.10
   4  11  -3   19.10    3.80
  -4  11   3   23.80    4.80
   4  11  -3   23.00    3.20
  -4  11   3   16.40    3.70
  -4  11   3   19.20    2.50
   3 -11  -3   -0.50    2.80
  -3 -11   3    1.60    2.30
  -3 -11   3    3.20    2.00
  -3 -11   3    0.70    2.60
   3 -11  -3    3.40    1.80
   3  11  -3    4.00    2.40
  -3  11   3    0.80    2.20
  -3  11   3   -0.50    3.20
   3  11  -3    0.40    2.90
  -3  11   3    1.10    2.70
   2 -11  -3   -1.70    2.60
  -2 -11   3    5.60    2.40
  -2 -11   3    5.20    2.60
  -2 -11   3    2.80    2.20
   2 -11  -3    2.00    2.10
  -2  11   3    1.40    2.70
  -2  11   3   -3.20    2.40
   2  11  -3    3.40    3.00
  -2  11   3    5.00    3.20
   2  11  -3    5.30    2.50
   1 -11  -3   34.20    3.70
  -1 -11   3   32.80    3.70
   1 -11  -3   27.10    3.60
  -1 -11   3   22.60    3.20
  -1 -11   3   29.70    3.80
   1  11  -3   27.70    3.80
  -1  11   3   30.50    4.10
  -1  11   3   38.60    4.70
  -1  11   3   33.70    4.10
   1  11  -3   30.60    4.10
   0 -11  -3  163.58    8.00
   0 -11   3  153.58    8.20
   0 -11   3  156.08    7.60
   0 -11  -3  163.98    8.00
   0  11  -3  160.88    9.00
   0  11   3  168.38    8.80
   0  11  -3  159.98    7.90
   0  11   3  165.18    8.80
   0  11  -3  156.68    8.20
   1 -11   3   21.80    3.30
   1 -11   3   20.90    3.10
  -1 -11  -3   37.20    3.70
  -1 -11  -3   30.00    4.20
[truncated: 2,149,203 more chars]
