# Supplementary material for: Practical synthetic strategies towards lipophilic 6-iodotetrahydroquinolines and -dihydroquinolines
Source: Beilstein J Org Chem. 2016 Aug 16;12:1851–62. doi: 10.3762/bjoc.12.174 (PMC5082455; doi:10.3762/bjoc.12.174)
Supplement: File 2 — Crystallographic Information Files of compounds 13, 14, 15b, 19, 29, and 30. [file Beilstein_J_Org_Chem-12-1851-s002.zip › 30_ 1433621.cif]

data_mo_dc355d_0m
_audit_creation_date              2015-11-16
_audit_creation_method
;
Olex2 1.2
(compiled 2015.09.30 svn.r3233 for OlexSys, GUI svn.r5103)
;
_shelxl_version_number            2014-3
_publ_contact_author_address      Chemistry Department, Durham University, South Road, Durham, DH1 3LE, UK
_publ_contact_author_email        andy.whiting@durham.ac.uk
_publ_contact_author_name         Andrew Whiting
_publ_contact_author_phone        ?
_publ_requested_journal           Beilstein J. Org. Chem.
_publ_section_references
;
Dolomanov, O.V., Bourhis, L.J., Gildea, R.J, Howard, J.A.K. & Puschmann, H.
 (2009), J. Appl. Cryst. 42, 339-341.

Sheldrick, G.M. (2015). Acta Cryst. A71, 3-8.

Sheldrick, G.M. (2015). Acta Cryst. C71, 3-8.
;
_chemical_name_common             ?
_chemical_name_systematic
4,4-dimethyl-1-(propan-2-yl)-6-(tetramethyl-1,3,2-dioxaborolan-2-yl)-1,4-dihydroquinoline
_chemical_formula_moiety          'C20 H30 B N O2'
_chemical_formula_sum             'C20 H30 B N O2'
_chemical_formula_weight          327.26
_chemical_melting_point           ?
loop_
  _atom_type_symbol
  _atom_type_description
  _atom_type_scat_dispersion_real
  _atom_type_scat_dispersion_imag
  _atom_type_scat_source
 'C' 'C' 0.0033 0.0016 'International Tables Vol C Tables 4.2.6.8 and 6.1.1.4'
 'H' 'H' 0.0000 0.0000 'International Tables Vol C Tables 4.2.6.8 and 6.1.1.4'
 'B' 'B' 0.0013 0.0007 'International Tables Vol C Tables 4.2.6.8 and 6.1.1.4'
 'N' 'N' 0.0061 0.0033 'International Tables Vol C Tables 4.2.6.8 and 6.1.1.4'
 'O' 'O' 0.0106 0.0060 'International Tables Vol C Tables 4.2.6.8 and 6.1.1.4'

_shelx_space_group_comment
;
The symmetry employed for this shelxl refinement is uniquely defined
by the following loop, which should always be used as a source of
symmetry information in preference to the above space-group names.
They are only intended as comments.
;
_space_group_crystal_system       'monoclinic'
_space_group_IT_number            14
_space_group_name_H-M_alt         'P 1 21/c 1'
_space_group_name_Hall            '-P 2ybc'
loop_
  _space_group_symop_operation_xyz
 'x, y, z'
 '-x, y+1/2, -z+1/2'
 '-x, -y, -z'
 'x, -y-1/2, z-1/2'

_cell_length_a                    12.2051(5)
_cell_length_b                    11.3054(5)
_cell_length_c                    28.6657(12)
_cell_angle_alpha                 90
_cell_angle_beta                  95.011(2)
_cell_angle_gamma                 90
_cell_volume                      3940.3(3)
_cell_formula_units_Z             8
_cell_measurement_reflns_used     9672
_cell_measurement_temperature     120
_cell_measurement_theta_max       29.37
_cell_measurement_theta_min       2.29
_shelx_estimated_absorpt_T_max    ?
_shelx_estimated_absorpt_T_min    ?
_exptl_absorpt_coefficient_mu     0.069
_exptl_absorpt_correction_T_max   0.7459
_exptl_absorpt_correction_T_min   0.7025
_exptl_absorpt_correction_type    multi-scan
_exptl_absorpt_process_details
;
SADABS-2014/4 (Bruker,2014) was used for absorption correction.
wR2(int) was 0.0746 before and 0.0513 after correction.
The Ratio of minimum to maximum transmission is 0.9418.
The \l/2 correction factor is Not present.
;
_exptl_crystal_colour             'clear colourless'
_exptl_crystal_colour_lustre      clear
_exptl_crystal_colour_modifier    .
_exptl_crystal_colour_primary     colourless
_exptl_crystal_density_diffrn     1.103
_exptl_crystal_density_meas       ?
_exptl_crystal_density_method     ?
_exptl_crystal_description        block
_exptl_crystal_F_000              1424
_exptl_crystal_preparation        'Borylation of DC354'
_exptl_crystal_recrystallization_method
'The material was recrystallised from EtOAc by slow evaporation'
_exptl_crystal_size_max           0.216
_exptl_crystal_size_mid           0.188
_exptl_crystal_size_min           0.082
_exptl_special_details
;
 ?
;
_exptl_transmission_factor_max    ?
_exptl_transmission_factor_min    ?
_diffrn_reflns_av_R_equivalents   0.0548
_diffrn_reflns_av_unetI/netI      0.0422
_diffrn_reflns_Laue_measured_fraction_full 0.999
_diffrn_reflns_Laue_measured_fraction_max 0.998
_diffrn_reflns_limit_h_max        16
_diffrn_reflns_limit_h_min        -16
_diffrn_reflns_limit_k_max        15
_diffrn_reflns_limit_k_min        -15
_diffrn_reflns_limit_l_max        39
_diffrn_reflns_limit_l_min        -39
_diffrn_reflns_number             81825
_diffrn_reflns_point_group_measured_fraction_full 0.999
_diffrn_reflns_point_group_measured_fraction_max 0.998
_diffrn_reflns_theta_full         26.000
_diffrn_reflns_theta_max          29.498
_diffrn_reflns_theta_min          2.293
_diffrn_ambient_temperature       120
_diffrn_detector                  'Bruker APEX2 area detector'
_diffrn_detector_area_resol_mean  7.9
_diffrn_detector_type             'CCD area detector'
_diffrn_measured_fraction_theta_full 0.999
_diffrn_measured_fraction_theta_max 0.998
_diffrn_measurement_device        'three-circle diffractometer'
_diffrn_measurement_device_type   'Bruker APEX-II CCD'
_diffrn_measurement_method        '\w and \f scans'
_diffrn_radiation_monochromator   'mirror optics'
_diffrn_radiation_probe           x-ray
_diffrn_radiation_type            MoK\a
_diffrn_radiation_wavelength      0.71073
_diffrn_source                    'microfocus sealed X-ray tube'
_diffrn_source_type               'Incoatec I\ms'
_diffrn_standards_number          0
_reflns_Friedel_coverage          0.000
_reflns_Friedel_fraction_full     .
_reflns_Friedel_fraction_max      .
_reflns_number_gt                 7618
_reflns_number_total              10946
_reflns_special_details
;
 Reflections were merged by SHELXL according to the crystal
 class for the calculation of statistics and refinement.
 
 _reflns_Friedel_fraction is defined as the number of unique
 Friedel pairs measured divided by the number that would be
 possible theoretically, ignoring centric projections and
 systematic absences.
;
_reflns_threshold_expression      'I > 2\s(I)'
_computing_cell_refinement        'SAINT v8.34A (Bruker, 2013)'
_computing_data_collection        ?
_computing_data_reduction         'SAINT v8.34A (Bruker, 2013)'
_computing_molecular_graphics     'Olex2 (Dolomanov et al., 2009)'
_computing_publication_material   'Olex2 (Dolomanov et al., 2009)'
_computing_structure_refinement   'ShelXL (Sheldrick, 2015)'
_computing_structure_solution     'ShelXT (Sheldrick, 2015)'
_refine_diff_density_max          0.388
_refine_diff_density_min          -0.187
_refine_diff_density_rms          0.052
_refine_ls_extinction_coef        .
_refine_ls_extinction_method      none
_refine_ls_goodness_of_fit_ref    1.034
_refine_ls_hydrogen_treatment     constr
_refine_ls_matrix_type            full
_refine_ls_number_parameters      449
_refine_ls_number_reflns          10946
_refine_ls_number_restraints      0
_refine_ls_R_factor_all           0.0890
_refine_ls_R_factor_gt            0.0547
_refine_ls_restrained_S_all       1.034
_refine_ls_shift/su_max           0.001
_refine_ls_shift/su_mean          0.000
_refine_ls_structure_factor_coef  Fsqd
_refine_ls_weighting_details
'w=1/[\s^2^(Fo^2^)+(0.0616P)^2^+1.2798P] where P=(Fo^2^+2Fc^2^)/3'
_refine_ls_weighting_scheme       calc
_refine_ls_wR_factor_gt           0.1250
_refine_ls_wR_factor_ref          0.1412
_refine_special_details
;
 ?
;
_olex2_refinement_description
;
1. Fixed Uiso
 At 1.2 times of:
  All C(H) groups
 At 1.5 times of:
  All C(H,H,H) groups
2.a Ternary CH refined with riding coordinates:
 C8(H8), C32(H32)
2.b Aromatic/amide H refined with riding coordinates:
 C3(H3), C5(H5), C6(H6), C11(H11), C12(H12), C27(H27), C29(H29), C30(H30),
 C35(H35), C36(H36)
2.c Idealised Me refined as rotating group:
 C9(H9A,H9B,H9C), C10(H10A,H10B,H10C), C14(H14A,H14B,H14C), C15(H15A,H15B,
 H15C), C20(H20A,H20B,H20C), C21(H21A,H21B,H21C), C23(H23A,H23B,H23C), C24(H24A,
 H24B,H24C), C33(H33A,H33B,H33C), C34(H34A,H34B,H34C), C38(H38A,H38B,H38C),
 C39(H39A,H39B,H39C), C44(H44A,H44B,H44C), C45(H45A,H45B,H45C), C47(H47A,H47B,
 H47C), C48(H48A,H48B,H48C)
;
_atom_sites_solution_hydrogens    geom
_atom_sites_solution_primary      ?
_atom_sites_solution_secondary    ?
loop_
  _atom_site_label
  _atom_site_type_symbol
  _atom_site_fract_x
  _atom_site_fract_y
  _atom_site_fract_z
  _atom_site_U_iso_or_equiv
  _atom_site_adp_type
  _atom_site_occupancy
  _atom_site_site_symmetry_order
  _atom_site_calc_flag
  _atom_site_refinement_flags_posn
  _atom_site_refinement_flags_adp
  _atom_site_refinement_flags_occupancy
  _atom_site_disorder_assembly
  _atom_site_disorder_group
 O17 O 0.52854(7) 1.08910(8) 0.35843(3) 0.0237(2) Uani 1 1 d . . . . .
 O18 O 0.51448(7) 0.99626(8) 0.42860(3) 0.0226(2) Uani 1 1 d . . . . .
 N7 N 0.82839(9) 0.61197(10) 0.32780(4) 0.0225(2) Uani 1 1 d . . . . .
 C1 C 0.76539(10) 0.70592(11) 0.34209(5) 0.0184(3) Uani 1 1 d . . . . .
 C2 C 0.73713(11) 0.71069(11) 0.38898(5) 0.0193(3) Uani 1 1 d . . . . .
 C3 C 0.67545(11) 0.80623(11) 0.40249(5) 0.0200(3) Uani 1 1 d . . . . .
 H3 H 0.6577 0.8099 0.4341 0.024 Uiso 1 1 calc R . . . .
 C4 C 0.63814(10) 0.89716(11) 0.37206(5) 0.0182(3) Uani 1 1 d . . . . .
 C5 C 0.66670(10) 0.88928(11) 0.32609(5) 0.0189(3) Uani 1 1 d . . . . .
 H5 H 0.6427 0.9493 0.3044 0.023 Uiso 1 1 calc R . . . .
 C6 C 0.72880(10) 0.79693(11) 0.31123(5) 0.0190(3) Uani 1 1 d . . . . .
 H6 H 0.7471 0.7949 0.2797 0.023 Uiso 1 1 calc R . . . .
 C8 C 0.86847(11) 0.60918(12) 0.28071(5) 0.0237(3) Uani 1 1 d . . . . .
 H8 H 0.8117 0.6490 0.2588 0.028 Uiso 1 1 calc R . . . .
 C9 C 0.87990(14) 0.48257(14) 0.26349(6) 0.0371(4) Uani 1 1 d . . . . .
 H9A H 0.9425 0.4445 0.2812 0.056 Uiso 1 1 calc GR . . . .
 H9B H 0.8920 0.4833 0.2301 0.056 Uiso 1 1 calc GR . . . .
 H9C H 0.8125 0.4385 0.2680 0.056 Uiso 1 1 calc GR . . . .
 C10 C 0.97489(12) 0.67857(13) 0.27928(5) 0.0296(3) Uani 1 1 d . . . . .
 H10A H 0.9642 0.7593 0.2905 0.044 Uiso 1 1 calc GR . . . .
 H10B H 0.9957 0.6812 0.2470 0.044 Uiso 1 1 calc GR . . . .
 H10C H 1.0333 0.6399 0.2994 0.044 Uiso 1 1 calc GR . . . .
 C11 C 0.88673(13) 0.54571(13) 0.36289(5) 0.0317(3) Uani 1 1 d . . . . .
 H11 H 0.9468 0.4991 0.3546 0.038 Uiso 1 1 calc R . . . .
 C12 C 0.86285(13) 0.54431(13) 0.40689(6) 0.0341(4) Uani 1 1 d . . . . .
 H12 H 0.9091 0.5015 0.4293 0.041 Uiso 1 1 calc R . . . .
 C13 C 0.76504(13) 0.60830(12) 0.42252(5) 0.0270(3) Uani 1 1 d . . . . .
 C14 C 0.79014(19) 0.65020(16) 0.47309(6) 0.0521(5) Uani 1 1 d . . . . .
 H14A H 0.8472 0.7114 0.4742 0.078 Uiso 1 1 calc GR . . . .
 H14B H 0.8161 0.5832 0.4927 0.078 Uiso 1 1 calc GR . . . .
 H14C H 0.7232 0.6828 0.4847 0.078 Uiso 1 1 calc GR . . . .
 C15 C 0.66654(15) 0.52258(15) 0.41977(7) 0.0450(4) Uani 1 1 d . . . . .
 H15A H 0.6020 0.5633 0.4301 0.068 Uiso 1 1 calc GR . . . .
 H15B H 0.6844 0.4543 0.4401 0.068 Uiso 1 1 calc GR . . . .
 H15C H 0.6506 0.4956 0.3874 0.068 Uiso 1 1 calc GR . . . .
 C19 C 0.43537(11) 1.14455(12) 0.37861(5) 0.0234(3) Uani 1 1 d . . . . .
 C20 C 0.43926(13) 1.27645(13) 0.36995(6) 0.0346(4) Uani 1 1 d . . . . .
 H20A H 0.5118 1.3070 0.3814 0.052 Uiso 1 1 calc GR . . . .
 H20B H 0.3826 1.3157 0.3866 0.052 Uiso 1 1 calc GR . . . .
 H20C H 0.4258 1.2920 0.3363 0.052 Uiso 1 1 calc GR . . . .
 C21 C 0.33243(12) 1.09046(14) 0.35351(5) 0.0298(3) Uani 1 1 d . . . . .
 H21A H 0.3324 1.1040 0.3197 0.045 Uiso 1 1 calc GR . . . .
 H21B H 0.2672 1.1273 0.3649 0.045 Uiso 1 1 calc GR . . . .
 H21C H 0.3314 1.0052 0.3597 0.045 Uiso 1 1 calc GR . . . .
 C22 C 0.45412(11) 1.10757(12) 0.43113(5) 0.0234(3) Uani 1 1 d . . . . .
 C23 C 0.35014(12) 1.08350(14) 0.45475(6) 0.0320(3) Uani 1 1 d . . . . .
 H23A H 0.3105 1.0171 0.4391 0.048 Uiso 1 1 calc GR . . . .
 H23B H 0.3033 1.1541 0.4527 0.048 Uiso 1 1 calc GR . . . .
 H23C H 0.3693 1.0637 0.4877 0.048 Uiso 1 1 calc GR . . . .
 C24 C 0.52870(13) 1.19097(14) 0.46089(6) 0.0355(4) Uani 1 1 d . . . . .
 H24A H 0.5486 1.1547 0.4915 0.053 Uiso 1 1 calc GR . . . .
 H24B H 0.4901 1.2657 0.4651 0.053 Uiso 1 1 calc GR . . . .
 H24C H 0.5955 1.2063 0.4452 0.053 Uiso 1 1 calc GR . . . .
 B16 B 0.56071(12) 0.99589(13) 0.38687(5) 0.0190(3) Uani 1 1 d . . . . .
 O41 O 0.01962(8) 0.27037(8) 0.41730(3) 0.0258(2) Uani 1 1 d . . . . .
 O42 O 0.02474(8) 0.18858(8) 0.34457(3) 0.0231(2) Uani 1 1 d . . . . .
 N31 N 0.34371(9) 0.64932(9) 0.31727(4) 0.0203(2) Uani 1 1 d . . . . .
 C25 C 0.27402(10) 0.56041(11) 0.33058(4) 0.0171(2) Uani 1 1 d . . . . .
 C26 C 0.23596(10) 0.56366(11) 0.37582(4) 0.0176(3) Uani 1 1 d . . . . .
 C27 C 0.17171(10) 0.47043(11) 0.38941(5) 0.0184(3) Uani 1 1 d . . . . .
 H27 H 0.1492 0.4707 0.4203 0.022 Uiso 1 1 calc R . . . .
 C28 C 0.13850(10) 0.37619(11) 0.35989(5) 0.0183(3) Uani 1 1 d . . . . .
 C29 C 0.17352(10) 0.37816(11) 0.31497(5) 0.0195(3) Uani 1 1 d . . . . .
 H29 H 0.1506 0.3169 0.2936 0.023 Uiso 1 1 calc R . . . .
 C30 C 0.24072(11) 0.46683(11) 0.30060(5) 0.0193(3) Uani 1 1 d . . . . .
 H30 H 0.2647 0.4643 0.2700 0.023 Uiso 1 1 calc R . . . .
 C32 C 0.38940(11) 0.64624(12) 0.27141(5) 0.0217(3) Uani 1 1 d . . . . .
 H32 H 0.3329 0.6088 0.2487 0.026 Uiso 1 1 calc R . . . .
 C33 C 0.40987(13) 0.77062(13) 0.25367(6) 0.0325(3) Uani 1 1 d . . . . .
 H33A H 0.4242 0.7670 0.2206 0.049 Uiso 1 1 calc GR . . . .
 H33B H 0.4736 0.8050 0.2720 0.049 Uiso 1 1 calc GR . . . .
 H33C H 0.3449 0.8198 0.2570 0.049 Uiso 1 1 calc GR . . . .
 C34 C 0.49228(12) 0.56991(13) 0.27270(5) 0.0297(3) Uani 1 1 d . . . . .
 H34A H 0.4755 0.4904 0.2837 0.045 Uiso 1 1 calc GR . . . .
 H34B H 0.5503 0.6053 0.2940 0.045 Uiso 1 1 calc GR . . . .
 H34C H 0.5173 0.5648 0.2412 0.045 Uiso 1 1 calc GR . . . .
 C35 C 0.40089(12) 0.71441(12) 0.35302(5) 0.0250(3) Uani 1 1 d . . . . .
 H35 H 0.4668 0.7534 0.3466 0.030 Uiso 1 1 calc R . . . .
 C36 C 0.36712(12) 0.72394(12) 0.39539(5) 0.0267(3) Uani 1 1 d . . . . .
 H36 H 0.4119 0.7639 0.4192 0.032 Uiso 1 1 calc R . . . .
 C37 C 0.25862(12) 0.67243(12) 0.40658(5) 0.0231(3) Uani 1 1 d . . . . .
 C38 C 0.26218(15) 0.64415(15) 0.45876(5) 0.0381(4) Uani 1 1 d . . . . .
 H38A H 0.1894 0.6176 0.4664 0.057 Uiso 1 1 calc GR . . . .
 H38B H 0.2832 0.7152 0.4769 0.057 Uiso 1 1 calc GR . . . .
 H38C H 0.3162 0.5815 0.4665 0.057 Uiso 1 1 calc GR . . . .
 C39 C 0.16703(14) 0.76372(13) 0.39406(7) 0.0390(4) Uani 1 1 d . . . . .
 H39A H 0.1818 0.8356 0.4127 0.058 Uiso 1 1 calc GR . . . .
 H39B H 0.0960 0.7305 0.4009 0.058 Uiso 1 1 calc GR . . . .
 H39C H 0.1650 0.7832 0.3607 0.058 Uiso 1 1 calc GR . . . .
 C43 C -0.06482(11) 0.12907(12) 0.36572(5) 0.0242(3) Uani 1 1 d . . . . .
 C44 C -0.17100(12) 0.18560(15) 0.34466(7) 0.0386(4) Uani 1 1 d . . . . .
 H44A H -0.1728 0.2689 0.3540 0.058 Uiso 1 1 calc GR . . . .
 H44B H -0.2340 0.1441 0.3560 0.058 Uiso 1 1 calc GR . . . .
 H44C H -0.1746 0.1802 0.3104 0.058 Uiso 1 1 calc GR . . . .
 C45 C -0.06197(13) -0.00119(12) 0.35318(6) 0.0311(3) Uani 1 1 d . . . . .
 H45A H -0.0812 -0.0109 0.3195 0.047 Uiso 1 1 calc GR . . . .
 H45B H -0.1150 -0.0444 0.3705 0.047 Uiso 1 1 calc GR . . . .
 H45C H 0.0121 -0.0325 0.3614 0.047 Uiso 1 1 calc GR . . . .
 C46 C -0.03822(11) 0.15742(12) 0.41854(5) 0.0254(3) Uani 1 1 d . . . . .
 C47 C -0.13754(14) 0.17336(16) 0.44622(7) 0.0430(4) Uani 1 1 d . . . . .
 H47A H -0.1130 0.1919 0.4789 0.065 Uiso 1 1 calc GR . . . .
 H47B H -0.1808 0.1002 0.4450 0.065 Uiso 1 1 calc GR . . . .
 H47C H -0.1830 0.2383 0.4327 0.065 Uiso 1 1 calc GR . . . .
 C48 C 0.04190(13) 0.06984(14) 0.44314(6) 0.0333(3) Uani 1 1 d . . . . .
 H48A H 0.1046 0.0585 0.4245 0.050 Uiso 1 1 calc GR . . . .
 H48B H 0.0047 -0.0060 0.4467 0.050 Uiso 1 1 calc GR . . . .
 H48C H 0.0680 0.1006 0.4741 0.050 Uiso 1 1 calc GR . . . .
 B40 B 0.06064(12) 0.27739(13) 0.37458(5) 0.0193(3) Uani 1 1 d . . . . .

loop_
  _atom_site_aniso_label
  _atom_site_aniso_U_11
  _atom_site_aniso_U_22
  _atom_site_aniso_U_33
  _atom_site_aniso_U_23
  _atom_site_aniso_U_13
  _atom_site_aniso_U_12
 O17 0.0208(5) 0.0202(5) 0.0310(5) 0.0035(4) 0.0073(4) 0.0069(4)
 O18 0.0218(5) 0.0209(5) 0.0250(5) -0.0013(4) 0.0022(4) 0.0043(4)
 N7 0.0248(6) 0.0165(5) 0.0260(6) 0.0012(4) 0.0008(5) 0.0068(4)
 C1 0.0161(6) 0.0141(6) 0.0245(7) 0.0000(5) -0.0011(5) 0.0007(5)
 C2 0.0204(6) 0.0150(6) 0.0219(6) 0.0024(5) -0.0023(5) 0.0003(5)
 C3 0.0205(6) 0.0186(6) 0.0209(6) 0.0007(5) 0.0013(5) 0.0001(5)
 C4 0.0146(6) 0.0148(6) 0.0250(6) 0.0003(5) 0.0005(5) -0.0007(5)
 C5 0.0166(6) 0.0157(6) 0.0242(7) 0.0040(5) 0.0000(5) 0.0011(5)
 C6 0.0186(6) 0.0181(6) 0.0202(6) 0.0022(5) 0.0012(5) 0.0005(5)
 C8 0.0254(7) 0.0202(6) 0.0249(7) -0.0026(5) -0.0009(5) 0.0056(5)
 C9 0.0415(9) 0.0263(8) 0.0430(9) -0.0120(7) 0.0001(7) 0.0064(7)
 C10 0.0274(8) 0.0308(8) 0.0306(8) -0.0007(6) 0.0027(6) 0.0026(6)
 C11 0.0332(8) 0.0246(7) 0.0370(8) 0.0072(6) 0.0020(7) 0.0152(6)
 C12 0.0394(9) 0.0268(7) 0.0350(8) 0.0103(6) -0.0028(7) 0.0142(7)
 C13 0.0373(8) 0.0195(6) 0.0238(7) 0.0046(5) 0.0003(6) 0.0056(6)
 C14 0.0927(16) 0.0357(9) 0.0248(8) 0.0030(7) -0.0114(9) 0.0228(10)
 C15 0.0482(10) 0.0290(8) 0.0582(12) 0.0205(8) 0.0063(9) -0.0024(7)
 C19 0.0189(6) 0.0200(6) 0.0318(7) -0.0012(6) 0.0049(5) 0.0049(5)
 C20 0.0317(8) 0.0212(7) 0.0519(10) 0.0033(7) 0.0090(7) 0.0084(6)
 C21 0.0237(7) 0.0327(8) 0.0323(8) -0.0021(6) -0.0020(6) 0.0056(6)
 C22 0.0200(6) 0.0218(7) 0.0284(7) -0.0058(6) 0.0019(5) 0.0030(5)
 C23 0.0264(8) 0.0374(8) 0.0333(8) -0.0047(7) 0.0084(6) 0.0038(6)
 C24 0.0317(8) 0.0312(8) 0.0421(9) -0.0150(7) -0.0049(7) 0.0011(6)
 B16 0.0151(7) 0.0174(7) 0.0242(7) -0.0007(6) 0.0002(6) -0.0004(5)
 O41 0.0300(5) 0.0185(5) 0.0304(5) -0.0018(4) 0.0111(4) -0.0057(4)
 O42 0.0227(5) 0.0194(5) 0.0277(5) -0.0011(4) 0.0055(4) -0.0080(4)
 N31 0.0233(6) 0.0156(5) 0.0219(6) -0.0016(4) 0.0017(4) -0.0069(4)
 C25 0.0166(6) 0.0125(5) 0.0218(6) 0.0003(5) -0.0008(5) -0.0017(4)
 C26 0.0179(6) 0.0138(6) 0.0207(6) -0.0021(5) -0.0012(5) -0.0003(5)
 C27 0.0187(6) 0.0162(6) 0.0205(6) -0.0002(5) 0.0025(5) 0.0001(5)
 C28 0.0159(6) 0.0134(6) 0.0258(7) -0.0011(5) 0.0021(5) -0.0002(5)
 C29 0.0198(6) 0.0148(6) 0.0240(7) -0.0045(5) 0.0018(5) -0.0032(5)
 C30 0.0219(6) 0.0165(6) 0.0195(6) -0.0031(5) 0.0027(5) -0.0042(5)
 C32 0.0254(7) 0.0193(6) 0.0204(6) 0.0009(5) 0.0019(5) -0.0073(5)
 C33 0.0385(9) 0.0251(7) 0.0330(8) 0.0091(6) -0.0014(7) -0.0106(6)
 C34 0.0286(8) 0.0282(7) 0.0328(8) -0.0037(6) 0.0056(6) -0.0044(6)
 C35 0.0256(7) 0.0199(6) 0.0292(7) -0.0035(6) 0.0001(6) -0.0106(5)
 C36 0.0296(7) 0.0224(7) 0.0275(7) -0.0073(6) -0.0012(6) -0.0100(6)
 C37 0.0278(7) 0.0173(6) 0.0243(7) -0.0064(5) 0.0033(6) -0.0047(5)
 C38 0.0510(10) 0.0393(9) 0.0243(8) -0.0097(7) 0.0056(7) -0.0183(8)
 C39 0.0358(9) 0.0201(7) 0.0605(11) -0.0159(7) 0.0010(8) 0.0023(6)
 C43 0.0176(6) 0.0181(6) 0.0372(8) 0.0033(6) 0.0051(6) -0.0054(5)
 C44 0.0218(7) 0.0325(8) 0.0601(11) 0.0107(8) -0.0045(7) -0.0052(6)
 C45 0.0291(8) 0.0203(7) 0.0445(9) -0.0028(6) 0.0062(7) -0.0086(6)
 C46 0.0244(7) 0.0187(6) 0.0346(8) 0.0020(6) 0.0110(6) -0.0048(5)
 C47 0.0394(9) 0.0367(9) 0.0573(11) -0.0001(8) 0.0287(8) -0.0045(7)
 C48 0.0354(8) 0.0288(8) 0.0358(9) 0.0097(7) 0.0033(7) -0.0047(6)
 B40 0.0164(7) 0.0144(6) 0.0272(8) 0.0008(6) 0.0022(6) 0.0015(5)

_geom_special_details
;
 All esds (except the esd in the dihedral angle between two l.s. planes)
 are estimated using the full covariance matrix.  The cell esds are taken
 into account individually in the estimation of esds in distances, angles
 and torsion angles; correlations between esds in cell parameters are only
 used when they are defined by crystal symmetry.  An approximate (isotropic)
 treatment of cell esds is used for estimating esds involving l.s. planes.
;
loop_
  _geom_bond_atom_site_label_1
  _geom_bond_atom_site_label_2
  _geom_bond_distance
  _geom_bond_site_symmetry_2
  _geom_bond_publ_flag
 O17 C19 1.4615(15) . ?
 O17 B16 1.3687(17) . ?
 O18 C22 1.4632(16) . ?
 O18 B16 1.3666(18) . ?
 N7 C1 1.3937(16) . ?
 N7 C8 1.4758(18) . ?
 N7 C11 1.3980(18) . ?
 C1 C2 1.4175(19) . ?
 C1 C6 1.4042(17) . ?
 C2 C3 1.3907(18) . ?
 C2 C13 1.5242(18) . ?
 C3 H3 0.9500 . ?
 C3 C4 1.3983(18) . ?
 C4 C5 1.3950(18) . ?
 C4 B16 1.5458(19) . ?
 C5 H5 0.9500 . ?
 C5 C6 1.3794(17) . ?
 C6 H6 0.9500 . ?
 C8 H8 1.0000 . ?
 C8 C9 1.5244(19) . ?
 C8 C10 1.521(2) . ?
 C9 H9A 0.9800 . ?
 C9 H9B 0.9800 . ?
 C9 H9C 0.9800 . ?
 C10 H10A 0.9800 . ?
 C10 H10B 0.9800 . ?
 C10 H10C 0.9800 . ?
 C11 H11 0.9500 . ?
 C11 C12 1.319(2) . ?
 C12 H12 0.9500 . ?
 C12 C13 1.498(2) . ?
 C13 C14 1.530(2) . ?
 C13 C15 1.541(2) . ?
 C14 H14A 0.9800 . ?
 C14 H14B 0.9800 . ?
 C14 H14C 0.9800 . ?
 C15 H15A 0.9800 . ?
 C15 H15B 0.9800 . ?
 C15 H15C 0.9800 . ?
 C19 C20 1.513(2) . ?
 C19 C21 1.521(2) . ?
 C19 C22 1.560(2) . ?
 C20 H20A 0.9800 . ?
 C20 H20B 0.9800 . ?
 C20 H20C 0.9800 . ?
 C21 H21A 0.9800 . ?
 C21 H21B 0.9800 . ?
 C21 H21C 0.9800 . ?
 C22 C23 1.514(2) . ?
 C22 C24 1.5198(19) . ?
 C23 H23A 0.9800 . ?
 C23 H23B 0.9800 . ?
 C23 H23C 0.9800 . ?
 C24 H24A 0.9800 . ?
 C24 H24B 0.9800 . ?
 C24 H24C 0.9800 . ?
 O41 C46 1.4611(16) . ?
 O41 B40 1.3652(18) . ?
 O42 C43 1.4597(15) . ?
 O42 B40 1.3690(17) . ?
 N31 C25 1.3915(16) . ?
 N31 C32 1.4723(17) . ?
 N31 C35 1.3979(17) . ?
 C25 C26 1.4158(18) . ?
 C25 C30 1.4007(17) . ?
 C26 C27 1.3895(17) . ?
 C26 C37 1.5242(17) . ?
 C27 H27 0.9500 . ?
 C27 C28 1.3983(17) . ?
 C28 C29 1.3921(18) . ?
 C28 B40 1.5485(19) . ?
 C29 H29 0.9500 . ?
 C29 C30 1.3806(17) . ?
 C30 H30 0.9500 . ?
 C32 H32 1.0000 . ?
 C32 C33 1.5234(19) . ?
 C32 C34 1.521(2) . ?
 C33 H33A 0.9800 . ?
 C33 H33B 0.9800 . ?
 C33 H33C 0.9800 . ?
 C34 H34A 0.9800 . ?
 C34 H34B 0.9800 . ?
 C34 H34C 0.9800 . ?
 C35 H35 0.9500 . ?
 C35 C36 1.320(2) . ?
 C36 H36 0.9500 . ?
 C36 C37 1.5067(19) . ?
 C37 C38 1.526(2) . ?
 C37 C39 1.541(2) . ?
 C38 H38A 0.9800 . ?
 C38 H38B 0.9800 . ?
 C38 H38C 0.9800 . ?
 C39 H39A 0.9800 . ?
 C39 H39B 0.9800 . ?
 C39 H39C 0.9800 . ?
 C43 C44 1.522(2) . ?
 C43 C45 1.5170(19) . ?
 C43 C46 1.554(2) . ?
 C44 H44A 0.9800 . ?
 C44 H44B 0.9800 . ?
 C44 H44C 0.9800 . ?
 C45 H45A 0.9800 . ?
 C45 H45B 0.9800 . ?
 C45 H45C 0.9800 . ?
 C46 C47 1.517(2) . ?
 C46 C48 1.521(2) . ?
 C47 H47A 0.9800 . ?
 C47 H47B 0.9800 . ?
 C47 H47C 0.9800 . ?
 C48 H48A 0.9800 . ?
 C48 H48B 0.9800 . ?
 C48 H48C 0.9800 . ?

loop_
  _geom_angle_atom_site_label_1
  _geom_angle_atom_site_label_2
  _geom_angle_atom_site_label_3
  _geom_angle
  _geom_angle_site_symmetry_1
  _geom_angle_site_symmetry_3
  _geom_angle_publ_flag
 B16 O17 C19 106.69(10) . . ?
 B16 O18 C22 107.10(10) . . ?
 C1 N7 C8 121.37(11) . . ?
 C1 N7 C11 117.15(12) . . ?
 C11 N7 C8 117.25(11) . . ?
 N7 C1 C2 119.60(11) . . ?
 N7 C1 C6 121.77(12) . . ?
 C6 C1 C2 118.64(11) . . ?
 C1 C2 C13 120.64(11) . . ?
 C3 C2 C1 118.42(11) . . ?
 C3 C2 C13 120.72(12) . . ?
 C2 C3 H3 118.2 . . ?
 C2 C3 C4 123.51(12) . . ?
 C4 C3 H3 118.2 . . ?
 C3 C4 B16 122.22(12) . . ?
 C5 C4 C3 116.59(12) . . ?
 C5 C4 B16 120.97(11) . . ?
 C4 C5 H5 119.0 . . ?
 C6 C5 C4 121.97(12) . . ?
 C6 C5 H5 119.0 . . ?
 C1 C6 H6 119.6 . . ?
 C5 C6 C1 120.86(12) . . ?
 C5 C6 H6 119.6 . . ?
 N7 C8 H8 107.3 . . ?
 N7 C8 C9 111.30(12) . . ?
 N7 C8 C10 111.45(11) . . ?
 C9 C8 H8 107.3 . . ?
 C10 C8 H8 107.3 . . ?
 C10 C8 C9 111.90(12) . . ?
 C8 C9 H9A 109.5 . . ?
 C8 C9 H9B 109.5 . . ?
 C8 C9 H9C 109.5 . . ?
 H9A C9 H9B 109.5 . . ?
 H9A C9 H9C 109.5 . . ?
 H9B C9 H9C 109.5 . . ?
 C8 C10 H10A 109.5 . . ?
 C8 C10 H10B 109.5 . . ?
 C8 C10 H10C 109.5 . . ?
 H10A C10 H10B 109.5 . . ?
 H10A C10 H10C 109.5 . . ?
 H10B C10 H10C 109.5 . . ?
 N7 C11 H11 118.2 . . ?
 C12 C11 N7 123.58(13) . . ?
 C12 C11 H11 118.2 . . ?
 C11 C12 H12 119.0 . . ?
 C11 C12 C13 121.92(13) . . ?
 C13 C12 H12 119.0 . . ?
 C2 C13 C14 112.19(12) . . ?
 C2 C13 C15 108.36(12) . . ?
 C12 C13 C2 108.56(12) . . ?
 C12 C13 C14 109.52(13) . . ?
 C12 C13 C15 108.65(13) . . ?
 C14 C13 C15 109.50(15) . . ?
 C13 C14 H14A 109.5 . . ?
 C13 C14 H14B 109.5 . . ?
 C13 C14 H14C 109.5 . . ?
 H14A C14 H14B 109.5 . . ?
 H14A C14 H14C 109.5 . . ?
 H14B C14 H14C 109.5 . . ?
 C13 C15 H15A 109.5 . . ?
 C13 C15 H15B 109.5 . . ?
 C13 C15 H15C 109.5 . . ?
 H15A C15 H15B 109.5 . . ?
 H15A C15 H15C 109.5 . . ?
 H15B C15 H15C 109.5 . . ?
 O17 C19 C20 108.73(11) . . ?
 O17 C19 C21 106.22(11) . . ?
 O17 C19 C22 102.32(10) . . ?
 C20 C19 C21 110.80(12) . . ?
 C20 C19 C22 114.74(12) . . ?
 C21 C19 C22 113.23(12) . . ?
 C19 C20 H20A 109.5 . . ?
 C19 C20 H20B 109.5 . . ?
 C19 C20 H20C 109.5 . . ?
 H20A C20 H20B 109.5 . . ?
 H20A C20 H20C 109.5 . . ?
 H20B C20 H20C 109.5 . . ?
 C19 C21 H21A 109.5 . . ?
 C19 C21 H21B 109.5 . . ?
 C19 C21 H21C 109.5 . . ?
 H21A C21 H21B 109.5 . . ?
 H21A C21 H21C 109.5 . . ?
 H21B C21 H21C 109.5 . . ?
 O18 C22 C19 102.41(10) . . ?
 O18 C22 C23 108.23(11) . . ?
 O18 C22 C24 106.37(11) . . ?
 C23 C22 C19 114.94(12) . . ?
 C23 C22 C24 110.16(12) . . ?
 C24 C22 C19 113.93(12) . . ?
 C22 C23 H23A 109.5 . . ?
 C22 C23 H23B 109.5 . . ?
 C22 C23 H23C 109.5 . . ?
 H23A C23 H23B 109.5 . . ?
 H23A C23 H23C 109.5 . . ?
 H23B C23 H23C 109.5 . . ?
 C22 C24 H24A 109.5 . . ?
 C22 C24 H24B 109.5 . . ?
 C22 C24 H24C 109.5 . . ?
 H24A C24 H24B 109.5 . . ?
 H24A C24 H24C 109.5 . . ?
 H24B C24 H24C 109.5 . . ?
 O17 B16 C4 122.88(12) . . ?
 O18 B16 O17 113.59(12) . . ?
 O18 B16 C4 123.48(12) . . ?
 B40 O41 C46 106.76(10) . . ?
 B40 O42 C43 106.70(11) . . ?
 C25 N31 C32 121.07(10) . . ?
 C25 N31 C35 117.20(11) . . ?
 C35 N31 C32 117.60(11) . . ?
 N31 C25 C26 119.33(11) . . ?
 N31 C25 C30 121.93(11) . . ?
 C30 C25 C26 118.73(11) . . ?
 C25 C26 C37 119.56(11) . . ?
 C27 C26 C25 118.38(11) . . ?
 C27 C26 C37 121.88(12) . . ?
 C26 C27 H27 118.3 . . ?
 C26 C27 C28 123.32(12) . . ?
 C28 C27 H27 118.3 . . ?
 C27 C28 B40 122.51(12) . . ?
 C29 C28 C27 116.83(11) . . ?
 C29 C28 B40 120.55(11) . . ?
 C28 C29 H29 119.1 . . ?
 C30 C29 C28 121.73(12) . . ?
 C30 C29 H29 119.1 . . ?
 C25 C30 H30 119.5 . . ?
 C29 C30 C25 120.90(12) . . ?
 C29 C30 H30 119.5 . . ?
 N31 C32 H32 107.3 . . ?
 N31 C32 C33 111.23(11) . . ?
 N31 C32 C34 111.58(11) . . ?
 C33 C32 H32 107.3 . . ?
 C34 C32 H32 107.3 . . ?
 C34 C32 C33 111.88(12) . . ?
 C32 C33 H33A 109.5 . . ?
 C32 C33 H33B 109.5 . . ?
 C32 C33 H33C 109.5 . . ?
 H33A C33 H33B 109.5 . . ?
 H33A C33 H33C 109.5 . . ?
 H33B C33 H33C 109.5 . . ?
 C32 C34 H34A 109.5 . . ?
 C32 C34 H34B 109.5 . . ?
 C32 C34 H34C 109.5 . . ?
 H34A C34 H34B 109.5 . . ?
 H34A C34 H34C 109.5 . . ?
 H34B C34 H34C 109.5 . . ?
 N31 C35 H35 118.6 . . ?
 C36 C35 N31 122.78(13) . . ?
 C36 C35 H35 118.6 . . ?
 C35 C36 H36 119.5 . . ?
 C35 C36 C37 121.00(12) . . ?
 C37 C36 H36 119.5 . . ?
 C26 C37 C38 112.71(11) . . ?
 C26 C37 C39 108.33(11) . . ?
 C36 C37 C26 107.89(11) . . ?
 C36 C37 C38 109.83(12) . . ?
 C36 C37 C39 108.96(12) . . ?
 C38 C37 C39 109.06(13) . . ?
 C37 C38 H38A 109.5 . . ?
 C37 C38 H38B 109.5 . . ?
 C37 C38 H38C 109.5 . . ?
 H38A C38 H38B 109.5 . . ?
 H38A C38 H38C 109.5 . . ?
 H38B C38 H38C 109.5 . . ?
 C37 C39 H39A 109.5 . . ?
 C37 C39 H39B 109.5 . . ?
 C37 C39 H39C 109.5 . . ?
 H39A C39 H39B 109.5 . . ?
 H39A C39 H39C 109.5 . . ?
 H39B C39 H39C 109.5 . . ?
 O42 C43 C44 106.52(11) . . ?
 O42 C43 C45 108.39(11) . . ?
 O42 C43 C46 102.08(10) . . ?
 C44 C43 C46 113.46(13) . . ?
 C45 C43 C44 110.49(12) . . ?
 C45 C43 C46 115.08(12) . . ?
 C43 C44 H44A 109.5 . . ?
 C43 C44 H44B 109.5 . . ?
 C43 C44 H44C 109.5 . . ?
 H44A C44 H44B 109.5 . . ?
 H44A C44 H44C 109.5 . . ?
 H44B C44 H44C 109.5 . . ?
 C43 C45 H45A 109.5 . . ?
 C43 C45 H45B 109.5 . . ?
 C43 C45 H45C 109.5 . . ?
 H45A C45 H45B 109.5 . . ?
 H45A C45 H45C 109.5 . . ?
 H45B C45 H45C 109.5 . . ?
 O41 C46 C43 102.52(10) . . ?
 O41 C46 C47 108.59(12) . . ?
 O41 C46 C48 106.73(11) . . ?
 C47 C46 C43 115.21(13) . . ?
 C47 C46 C48 110.22(13) . . ?
 C48 C46 C43 112.87(12) . . ?
 C46 C47 H47A 109.5 . . ?
 C46 C47 H47B 109.5 . . ?
 C46 C47 H47C 109.5 . . ?
 H47A C47 H47B 109.5 . . ?
 H47A C47 H47C 109.5 . . ?
 H47B C47 H47C 109.5 . . ?
 C46 C48 H48A 109.5 . . ?
 C46 C48 H48B 109.5 . . ?
 C46 C48 H48C 109.5 . . ?
 H48A C48 H48B 109.5 . . ?
 H48A C48 H48C 109.5 . . ?
 H48B C48 H48C 109.5 . . ?
 O41 B40 O42 113.49(12) . . ?
 O41 B40 C28 124.59(12) . . ?
 O42 B40 C28 121.91(12) . . ?

loop_
  _geom_torsion_atom_site_label_1
  _geom_torsion_atom_site_label_2
  _geom_torsion_atom_site_label_3
  _geom_torsion_atom_site_label_4
  _geom_torsion
  _geom_torsion_site_symmetry_1
  _geom_torsion_site_symmetry_2
  _geom_torsion_site_symmetry_3
  _geom_torsion_site_symmetry_4
  _geom_torsion_publ_flag
 O17 C19 C22 O18 -27.42(12) . . . . ?
 O17 C19 C22 C23 -144.52(12) . . . . ?
 O17 C19 C22 C24 87.00(13) . . . . ?
 N7 C1 C2 C3 179.15(12) . . . . ?
 N7 C1 C2 C13 -6.14(19) . . . . ?
 N7 C1 C6 C5 -179.86(12) . . . . ?
 N7 C11 C12 C13 4.2(3) . . . . ?
 C1 N7 C8 C9 -150.17(13) . . . . ?
 C1 N7 C8 C10 84.14(15) . . . . ?
 C1 N7 C11 C12 19.7(2) . . . . ?
 C1 C2 C3 C4 1.1(2) . . . . ?
 C1 C2 C13 C12 26.39(18) . . . . ?
 C1 C2 C13 C14 147.56(15) . . . . ?
 C1 C2 C13 C15 -91.43(16) . . . . ?
 C2 C1 C6 C5 0.05(19) . . . . ?
 C2 C3 C4 C5 -0.60(19) . . . . ?
 C2 C3 C4 B16 174.15(12) . . . . ?
 C3 C2 C13 C12 -159.02(13) . . . . ?
 C3 C2 C13 C14 -37.9(2) . . . . ?
 C3 C2 C13 C15 83.16(16) . . . . ?
 C3 C4 C5 C6 -0.18(18) . . . . ?
 C3 C4 B16 O17 176.16(12) . . . . ?
 C3 C4 B16 O18 -6.5(2) . . . . ?
 C4 C5 C6 C1 0.44(19) . . . . ?
 C5 C4 B16 O17 -9.3(2) . . . . ?
 C5 C4 B16 O18 168.02(12) . . . . ?
 C6 C1 C2 C3 -0.77(18) . . . . ?
 C6 C1 C2 C13 173.94(12) . . . . ?
 C8 N7 C1 C2 -174.17(12) . . . . ?
 C8 N7 C1 C6 5.75(19) . . . . ?
 C8 N7 C11 C12 176.97(15) . . . . ?
 C11 N7 C1 C2 -17.89(18) . . . . ?
 C11 N7 C1 C6 162.03(13) . . . . ?
 C11 N7 C8 C9 53.57(17) . . . . ?
 C11 N7 C8 C10 -72.12(15) . . . . ?
 C11 C12 C13 C2 -25.8(2) . . . . ?
 C11 C12 C13 C14 -148.57(17) . . . . ?
 C11 C12 C13 C15 91.86(18) . . . . ?
 C13 C2 C3 C4 -173.63(12) . . . . ?
 C19 O17 B16 O18 -12.26(15) . . . . ?
 C19 O17 B16 C4 165.31(12) . . . . ?
 C20 C19 C22 O18 -144.98(11) . . . . ?
 C20 C19 C22 C23 97.92(15) . . . . ?
 C20 C19 C22 C24 -30.56(17) . . . . ?
 C21 C19 C22 O18 86.47(13) . . . . ?
 C21 C19 C22 C23 -30.63(16) . . . . ?
 C21 C19 C22 C24 -159.11(12) . . . . ?
 C22 O18 B16 O17 -6.72(15) . . . . ?
 C22 O18 B16 C4 175.73(12) . . . . ?
 B16 O17 C19 C20 146.09(12) . . . . ?
 B16 O17 C19 C21 -94.62(13) . . . . ?
 B16 O17 C19 C22 24.32(13) . . . . ?
 B16 O18 C22 C19 21.21(13) . . . . ?
 B16 O18 C22 C23 143.02(12) . . . . ?
 B16 O18 C22 C24 -98.63(13) . . . . ?
 B16 C4 C5 C6 -174.99(12) . . . . ?
 O42 C43 C46 O41 28.46(12) . . . . ?
 O42 C43 C46 C47 146.20(12) . . . . ?
 O42 C43 C46 C48 -85.98(13) . . . . ?
 N31 C25 C26 C27 -176.28(11) . . . . ?
 N31 C25 C26 C37 8.43(18) . . . . ?
 N31 C25 C30 C29 178.52(12) . . . . ?
 N31 C35 C36 C37 -5.0(2) . . . . ?
 C25 N31 C32 C33 150.29(12) . . . . ?
 C25 N31 C32 C34 -84.00(14) . . . . ?
 C25 N31 C35 C36 -23.0(2) . . . . ?
 C25 C26 C27 C28 -3.04(19) . . . . ?
 C25 C26 C37 C36 -32.09(16) . . . . ?
 C25 C26 C37 C38 -153.52(13) . . . . ?
 C25 C26 C37 C39 85.72(15) . . . . ?
 C26 C25 C30 C29 -1.04(19) . . . . ?
 C26 C27 C28 C29 0.40(19) . . . . ?
 C26 C27 C28 B40 -175.89(12) . . . . ?
 C27 C26 C37 C36 152.79(12) . . . . ?
 C27 C26 C37 C38 31.36(18) . . . . ?
 C27 C26 C37 C39 -89.40(16) . . . . ?
 C27 C28 C29 C30 2.00(19) . . . . ?
 C27 C28 B40 O41 -1.8(2) . . . . ?
 C27 C28 B40 O42 176.95(12) . . . . ?
 C28 C29 C30 C25 -1.7(2) . . . . ?
 C29 C28 B40 O41 -177.97(12) . . . . ?
 C29 C28 B40 O42 0.79(19) . . . . ?
 C30 C25 C26 C27 3.29(18) . . . . ?
 C30 C25 C26 C37 -172.00(12) . . . . ?
 C32 N31 C25 C26 177.04(11) . . . . ?
 C32 N31 C25 C30 -2.51(19) . . . . ?
 C32 N31 C35 C36 179.53(14) . . . . ?
 C35 N31 C25 C26 20.45(17) . . . . ?
 C35 N31 C25 C30 -159.11(12) . . . . ?
 C35 N31 C32 C33 -53.20(16) . . . . ?
 C35 N31 C32 C34 72.50(15) . . . . ?
 C35 C36 C37 C26 30.83(18) . . . . ?
 C35 C36 C37 C38 154.03(14) . . . . ?
 C35 C36 C37 C39 -86.58(17) . . . . ?
 C37 C26 C27 C28 172.14(12) . . . . ?
 C43 O42 B40 O41 11.61(15) . . . . ?
 C43 O42 B40 C28 -167.28(12) . . . . ?
 C44 C43 C46 O41 -85.74(13) . . . . ?
 C44 C43 C46 C47 32.00(17) . . . . ?
 C44 C43 C46 C48 159.82(12) . . . . ?
 C45 C43 C46 O41 145.62(11) . . . . ?
 C45 C43 C46 C47 -96.64(15) . . . . ?
 C45 C43 C46 C48 31.18(16) . . . . ?
 C46 O41 B40 O42 8.01(15) . . . . ?
 C46 O41 B40 C28 -173.13(12) . . . . ?
 B40 O41 C46 C43 -22.62(13) . . . . ?
 B40 O41 C46 C47 -144.97(13) . . . . ?
 B40 O41 C46 C48 96.23(13) . . . . ?
 B40 O42 C43 C44 94.64(14) . . . . ?
 B40 O42 C43 C45 -146.45(12) . . . . ?
 B40 O42 C43 C46 -24.58(13) . . . . ?
 B40 C28 C29 C30 178.37(12) . . . . ?

_shelx_res_file
;
TITL mo_dc355d_0m_a.res in P2(1)/c
REM Old TITL mo_DC355D_0m in P21/c #14
REM SHELXT solution in P2(1)/c
REM R1 0.173, Rweak 0.006, Alpha 0.027, Orientation as input
REM Formula found by SHELXT: C42 N2 O4
CELL 0.71073 12.2051 11.3054 28.6657 90 95.011 90
ZERR 8 0.0005 0.0005 0.0012 0 0.002 0
LATT 1
SYMM -X,0.5+Y,0.5-Z
SFAC C H B N O
UNIT 160 240 8 8 16

L.S. 10
PLAN  20
TEMP -153.15
BOND $H
LIST 6
MORE -1
CONF
fmap 2
acta 52
OMIT 0 1 1
OMIT -1 0 2
REM <olex2.extras>
REM <HklSrc "%./mo_DC355D_0m.hkl">
REM </olex2.extras>

WGHT    0.061600    1.279800
FVAR       0.28842
O17   5    0.528542    1.089102    0.358430    11.00000    0.02085    0.02017 =
         0.03105    0.00353    0.00727    0.00693
O18   5    0.514480    0.996255    0.428604    11.00000    0.02178    0.02094 =
         0.02503   -0.00130    0.00219    0.00428
N7    4    0.828394    0.611968    0.327804    11.00000    0.02480    0.01647 =
         0.02599    0.00121    0.00082    0.00684
C1    1    0.765388    0.705918    0.342092    11.00000    0.01606    0.01414 =
         0.02453    0.00004   -0.00110    0.00074
C2    1    0.737130    0.710694    0.388981    11.00000    0.02038    0.01496 =
         0.02189    0.00243   -0.00233    0.00025
C3    1    0.675448    0.806232    0.402486    11.00000    0.02050    0.01857 =
         0.02092    0.00075    0.00134    0.00007
AFIX  43
H3    2    0.657712    0.809915    0.434069    11.00000   -1.20000
AFIX   0
C4    1    0.638142    0.897156    0.372062    11.00000    0.01456    0.01476 =
         0.02500    0.00026    0.00055   -0.00070
C5    1    0.666699    0.889281    0.326094    11.00000    0.01656    0.01573 =
         0.02418    0.00397    0.00000    0.00114
AFIX  43
H5    2    0.642656    0.949323    0.304378    11.00000   -1.20000
AFIX   0
C6    1    0.728801    0.796926    0.311226    11.00000    0.01860    0.01809 =
         0.02019    0.00220    0.00124    0.00046
AFIX  43
H6    2    0.747058    0.794863    0.279692    11.00000   -1.20000
AFIX   0
C8    1    0.868470    0.609176    0.280712    11.00000    0.02535    0.02020 =
         0.02493   -0.00256   -0.00093    0.00560
AFIX  13
H8    2    0.811710    0.648979    0.258829    11.00000   -1.20000
AFIX   0
C9    1    0.879902    0.482573    0.263492    11.00000    0.04151    0.02627 =
         0.04303   -0.01197    0.00014    0.00638
AFIX 137
H9A   2    0.942533    0.444520    0.281244    11.00000   -1.50000
H9B   2    0.891997    0.483348    0.230143    11.00000   -1.50000
H9C   2    0.812527    0.438461    0.268019    11.00000   -1.50000
AFIX   0
C10   1    0.974891    0.678572    0.279279    11.00000    0.02744    0.03083 =
         0.03058   -0.00071    0.00271    0.00255
AFIX 137
H10A  2    0.964205    0.759325    0.290454    11.00000   -1.50000
H10B  2    0.995721    0.681158    0.247044    11.00000   -1.50000
H10C  2    1.033311    0.639946    0.299415    11.00000   -1.50000
AFIX   0
C11   1    0.886728    0.545706    0.362888    11.00000    0.03315    0.02463 =
         0.03699    0.00723    0.00200    0.01520
AFIX  43
H11   2    0.946841    0.499141    0.354590    11.00000   -1.20000
AFIX   0
C12   1    0.862853    0.544313    0.406886    11.00000    0.03940    0.02682 =
         0.03497    0.01033   -0.00278    0.01415
AFIX  43
H12   2    0.909055    0.501469    0.429310    11.00000   -1.20000
AFIX   0
C13   1    0.765042    0.608300    0.422518    11.00000    0.03730    0.01951 =
         0.02377    0.00460    0.00029    0.00560
C14   1    0.790143    0.650197    0.473085    11.00000    0.09270    0.03575 =
         0.02481    0.00297   -0.01143    0.02276
AFIX 137
H14A  2    0.847197    0.711378    0.474240    11.00000   -1.50000
H14B  2    0.816070    0.583192    0.492745    11.00000   -1.50000
H14C  2    0.723236    0.682850    0.484654    11.00000   -1.50000
AFIX   0
C15   1    0.666543    0.522582    0.419769    11.00000    0.04816    0.02903 =
         0.05822    0.02052    0.00631   -0.00238
AFIX 137
H15A  2    0.601994    0.563302    0.430070    11.00000   -1.50000
H15B  2    0.684360    0.454309    0.440095    11.00000   -1.50000
H15C  2    0.650624    0.495617    0.387396    11.00000   -1.50000
AFIX   0
C19   1    0.435371    1.144555    0.378614    11.00000    0.01886    0.02003 =
         0.03178   -0.00125    0.00486    0.00493
C20   1    0.439259    1.276448    0.369953    11.00000    0.03172    0.02120 =
         0.05189    0.00335    0.00901    0.00839
AFIX 137
H20A  2    0.511836    1.307028    0.381353    11.00000   -1.50000
H20B  2    0.382614    1.315745    0.386590    11.00000   -1.50000
H20C  2    0.425846    1.291997    0.336306    11.00000   -1.50000
AFIX   0
C21   1    0.332432    1.090455    0.353511    11.00000    0.02370    0.03270 =
         0.03230   -0.00211   -0.00199    0.00563
AFIX 137
H21A  2    0.332416    1.104017    0.319744    11.00000   -1.50000
H21B  2    0.267161    1.127262    0.364926    11.00000   -1.50000
H21C  2    0.331379    1.005222    0.359685    11.00000   -1.50000
AFIX   0
C22   1    0.454122    1.107567    0.431127    11.00000    0.01996    0.02183 =
         0.02839   -0.00575    0.00190    0.00303
C23   1    0.350141    1.083495    0.454755    11.00000    0.02639    0.03740 =
         0.03326   -0.00468    0.00836    0.00383
AFIX 137
H23A  2    0.310454    1.017115    0.439135    11.00000   -1.50000
H23B  2    0.303333    1.154060    0.452674    11.00000   -1.50000
H23C  2    0.369349    1.063735    0.487744    11.00000   -1.50000
AFIX   0
C24   1    0.528697    1.190970    0.460888    11.00000    0.03173    0.03125 =
         0.04211   -0.01499   -0.00490    0.00110
AFIX 137
H24A  2    0.548639    1.154747    0.491515    11.00000   -1.50000
H24B  2    0.490063    1.265670    0.465136    11.00000   -1.50000
H24C  2    0.595476    1.206274    0.445204    11.00000   -1.50000
AFIX   0
B16   3    0.560709    0.995890    0.386868    11.00000    0.01514    0.01738 =
         0.02416   -0.00071    0.00021   -0.00038

O41   5    0.019616    0.270371    0.417300    11.00000    0.03000    0.01853 =
         0.03043   -0.00182    0.01110   -0.00567
O42   5    0.024740    0.188582    0.344573    11.00000    0.02271    0.01941 =
         0.02775   -0.00113    0.00550   -0.00803
N31   4    0.343715    0.649320    0.317266    11.00000    0.02327    0.01563 =
         0.02189   -0.00163    0.00172   -0.00694
C25   1    0.274021    0.560409    0.330581    11.00000    0.01656    0.01255 =
         0.02180    0.00026   -0.00080   -0.00166
C26   1    0.235959    0.563658    0.375825    11.00000    0.01788    0.01382 =
         0.02070   -0.00211   -0.00119   -0.00030
C27   1    0.171713    0.470433    0.389408    11.00000    0.01870    0.01624 =
         0.02055   -0.00017    0.00253    0.00008
AFIX  43
H27   2    0.149212    0.470735    0.420307    11.00000   -1.20000
AFIX   0
C28   1    0.138505    0.376192    0.359894    11.00000    0.01585    0.01344 =
         0.02578   -0.00107    0.00208   -0.00019
C29   1    0.173515    0.378164    0.314965    11.00000    0.01976    0.01480 =
         0.02397   -0.00454    0.00176   -0.00317
AFIX  43
H29   2    0.150564    0.316891    0.293628    11.00000   -1.20000
AFIX   0
C30   1    0.240715    0.466829    0.300604    11.00000    0.02191    0.01650 =
         0.01954   -0.00305    0.00273   -0.00415
AFIX  43
H30   2    0.264696    0.464338    0.269970    11.00000   -1.20000
AFIX   0
C32   1    0.389399    0.646239    0.271413    11.00000    0.02545    0.01933 =
         0.02040    0.00089    0.00191   -0.00734
AFIX  13
H32   2    0.332853    0.608830    0.248717    11.00000   -1.20000
AFIX   0
C33   1    0.409866    0.770624    0.253670    11.00000    0.03850    0.02515 =
         0.03301    0.00906   -0.00141   -0.01058
AFIX 137
H33A  2    0.424212    0.767048    0.220591    11.00000   -1.50000
H33B  2    0.473629    0.805016    0.271959    11.00000   -1.50000
H33C  2    0.344924    0.819824    0.257045    11.00000   -1.50000
AFIX   0
C34   1    0.492277    0.569910    0.272702    11.00000    0.02862    0.02824 =
         0.03277   -0.00367    0.00564   -0.00436
AFIX 137
H34A  2    0.475544    0.490399    0.283701    11.00000   -1.50000
H34B  2    0.550298    0.605317    0.294047    11.00000   -1.50000
H34C  2    0.517260    0.564846    0.241189    11.00000   -1.50000
AFIX   0
C35   1    0.400891    0.714410    0.353023    11.00000    0.02557    0.01994 =
         0.02919   -0.00347    0.00015   -0.01058
AFIX  43
H35   2    0.466826    0.753438    0.346572    11.00000   -1.20000
AFIX   0
C36   1    0.367124    0.723940    0.395388    11.00000    0.02963    0.02242 =
         0.02751   -0.00733   -0.00117   -0.00996
AFIX  43
H36   2    0.411924    0.763879    0.419170    11.00000   -1.20000
AFIX   0
C37   1    0.258616    0.672427    0.406578    11.00000    0.02779    0.01735 =
         0.02435   -0.00642    0.00327   -0.00466
C38   1    0.262182    0.644152    0.458755    11.00000    0.05097    0.03928 =
         0.02434   -0.00969    0.00558   -0.01827
AFIX 137
H38A  2    0.189411    0.617588    0.466360    11.00000   -1.50000
H38B  2    0.283214    0.715246    0.476945    11.00000   -1.50000
H38C  2    0.316210    0.581467    0.466461    11.00000   -1.50000
AFIX   0
C39   1    0.167031    0.763718    0.394062    11.00000    0.03579    0.02011 =
         0.06048   -0.01588    0.00096    0.00227
AFIX 137
H39A  2    0.181807    0.835581    0.412674    11.00000   -1.50000
H39B  2    0.095998    0.730488    0.400870    11.00000   -1.50000
H39C  2    0.165029    0.783157    0.360682    11.00000   -1.50000
AFIX   0
C43   1   -0.064820    0.129070    0.365719    11.00000    0.01763    0.01811 =
         0.03723    0.00326    0.00505   -0.00544
C44   1   -0.170998    0.185599    0.344664    11.00000    0.02180    0.03253 =
         0.06006    0.01072   -0.00449   -0.00524
AFIX 137
H44A  2   -0.172763    0.268901    0.354025    11.00000   -1.50000
H44B  2   -0.234006    0.144061    0.355965    11.00000   -1.50000
H44C  2   -0.174606    0.180242    0.310442    11.00000   -1.50000
AFIX   0
C45   1   -0.061968   -0.001191    0.353179    11.00000    0.02908    0.02034 =
         0.04454   -0.00279    0.00619   -0.00864
AFIX 137
H45A  2   -0.081184   -0.010858    0.319482    11.00000   -1.50000
H45B  2   -0.114952   -0.044365    0.370542    11.00000   -1.50000
H45C  2    0.012075   -0.032501    0.361411    11.00000   -1.50000
AFIX   0
C46   1   -0.038220    0.157415    0.418538    11.00000    0.02440    0.01867 =
         0.03457    0.00198    0.01105   -0.00477
C47   1   -0.137539    0.173358    0.446224    11.00000    0.03940    0.03666 =
         0.05730   -0.00014    0.02872   -0.00455
AFIX 137
H47A  2   -0.112981    0.191869    0.478870    11.00000   -1.50000
H47B  2   -0.180768    0.100202    0.444995    11.00000   -1.50000
H47C  2   -0.183049    0.238306    0.432698    11.00000   -1.50000
AFIX   0
C48   1    0.041899    0.069838    0.443142    11.00000    0.03541    0.02885 =
         0.03578    0.00965    0.00334   -0.00472
AFIX 137
H48A  2    0.104622    0.058483    0.424476    11.00000   -1.50000
H48B  2    0.004712   -0.006038    0.446711    11.00000   -1.50000
H48C  2    0.067985    0.100641    0.474091    11.00000   -1.50000
AFIX   0
B40   3    0.060637    0.277392    0.374579    11.00000    0.01635    0.01440 =
         0.02718    0.00084    0.00221    0.00148
HKLF 4

REM  mo_dc355d_0m_a.res in P2(1)/c
REM R1 =  0.0547 for    7618 Fo > 4sig(Fo)  and  0.0890 for all   10946 data
REM    449 parameters refined using      0 restraints

END

WGHT      0.0619      1.2788

REM Highest difference peak  0.388,  deepest hole -0.187,  1-sigma level  0.052
Q1    1   0.5965  0.9460  0.3785  11.00000  0.05    0.39
Q2    1   0.4475  1.1348  0.4049  11.00000  0.05    0.38
Q3    1   0.2451  0.6191  0.3910  11.00000  0.05    0.37
Q4    1   0.1076  0.3275  0.3635  11.00000  0.05    0.36
Q5    1   0.7674  0.7136  0.3674  11.00000  0.05    0.35
Q6    1   0.7521  0.6665  0.4056  11.00000  0.05    0.35
Q7    1  -0.0464  0.1458  0.3917  11.00000  0.05    0.35
Q8    1   0.2606  0.6487  0.4297  11.00000  0.05    0.35
Q9    1   0.2421  0.5723  0.3510  11.00000  0.05    0.35
Q10   1   0.4343  1.2052  0.3743  11.00000  0.05    0.34
Q11   1   0.4862  1.1600  0.4384  11.00000  0.05    0.34
Q12   1   0.6427  0.8442  0.3804  11.00000  0.05    0.33
Q13   1   0.6404  0.8837  0.3492  11.00000  0.05    0.32
Q14   1   0.7012  0.7585  0.3917  11.00000  0.05    0.32
Q15   1   0.3597  0.6947  0.3333  11.00000  0.05    0.31
Q16   1   0.2229  0.5052  0.3833  11.00000  0.05    0.31
Q17   1   0.7546  0.7621  0.3309  11.00000  0.05    0.31
Q18   1  -0.0623  0.0651  0.3635  11.00000  0.05    0.30
Q19   1   0.3164  0.6899  0.4018  11.00000  0.05    0.30
Q20   1   0.3960  0.7117  0.2649  11.00000  0.05    0.30
;
_shelx_res_checksum               79754
_shelx_hkl_file
;
   2   0   0    2.10    0.40
  -2   0   0    3.10    0.40
  -2   0   0    1.80    0.40
   2   0   0    2.80    0.30
   2   0   0    3.00    0.40
   2   0   0    2.40    0.40
  -2   0   0    2.20    0.30
   3   0   0   76.49    3.60
   3   0   0   74.09    3.70
  -3   0   0   74.49    3.60
  -3   0   0   76.99    3.70
  -3   0   0   74.39    3.80
   3   0   0   69.09    3.90
   4   0   0   75.49    3.90
   4   0   0   77.49    3.90
  -4   0   0   73.09    3.80
  -4   0   0   74.89    3.90
   4   0   0   76.29    3.70
   4   0   0   75.49    3.80
  -4   0   0   74.49    3.70
   5   0   0    4.40    0.90
  -5   0   0    2.10    0.90
  -5   0   0    4.90    0.80
   5   0   0    3.70    0.70
  -5   0   0    3.60    0.50
   5   0   0    2.60    0.80
   5   0   0    4.00    0.50
   6   0   0  451.95   22.00
   6   0   0  474.25   22.10
   6   0   0  451.75   22.10
   6   0   0  462.45   21.80
  -6   0   0  462.05   22.00
  -6   0   0  446.46   21.80
  -7   0   0    4.30    1.20
   7   0   0    3.00    1.20
  -7   0   0    3.30    0.70
   7   0   0    4.40    1.20
   7   0   0    4.70    0.80
  -7   0   0    3.70    1.00
   7   0   0    4.70    1.00
  -8   0   0   97.79    5.50
   8   0   0   95.49    5.60
  -8   0   0  101.39    5.30
   8   0   0  103.29    5.00
   8   0   0   96.69    5.20
  -8   0   0   96.79    5.00
   9   0   0   10.40    1.00
  -9   0   0   10.80    1.70
   9   0   0    6.50    1.50
   9   0   0   11.50    1.50
  -9   0   0    8.70    1.00
  10   0   0  523.45   26.00
  10   0   0  558.94   25.80
  10   0   0  536.95   26.20
 -10   0   0  536.95   26.30
  11   0   0    7.00    1.70
  11   0   0    6.50    1.80
  11   0   0    3.90    1.10
 -11   0   0    6.40    1.90
  12   0   0   42.80    4.20
 -12   0   0   53.79    4.60
  12   0   0   50.59    3.80
  12   0   0   46.90    3.00
 -13   0   0   33.10    3.50
  13   0   0   32.90    3.00
  13   0   0   27.50    3.40
 -14   0   0   40.60    4.40
  14   0   0   33.70    3.40
  15   0   0   -0.10    3.00
 -15   0   0   -1.80    3.70
  15   0   0   -2.60    2.60
 -16   0   0   -8.50    4.00
  16   0   0   -2.50    3.50
  16   0   0    3.20    3.10
  -1  -1   0  315.37   14.80
   1  -1   0  307.77   14.80
  -1  -1   0  338.87   14.80
   1  -1   0  288.57   14.70
  -1  -1   0  312.47   14.80
   1  -1   0  297.77   14.80
   1   1   0  287.97   14.70
   1   1   0  328.57   14.80
   1   1   0  315.97   14.80
   2  -1   0  165.28    7.90
  -2  -1   0  163.58    7.80
   2  -1   0  165.08    7.90
   2  -1   0  164.08    7.90
   2  -1   0  162.98    7.90
  -2  -1   0  164.28    7.90
  -2  -1   0  163.38    7.90
  -2   1   0  162.68    7.90
   2   1   0  166.18    7.90
   2   1   0  165.78    7.80
  -2   1   0  161.18    7.90
   2   1   0  163.28    7.90
   2   1   0  161.88    7.90
  -3  -1   0  123.39    5.80
   3  -1   0  121.39    5.90
  -3  -1   0  124.09    5.80
   3  -1   0  119.69    5.90
   3  -1   0  120.69    5.90
  -3  -1   0  116.59    5.90
   3  -1   0  124.39    5.80
   3   1   0  121.39    5.90
  -3   1   0  115.89    5.90
  -3   1   0  118.19    5.90
  -3   1   0  116.49    5.80
   3   1   0  118.99    5.90
   3   1   0  117.59    5.80
   3   1   0  119.59    5.80
   4  -1   0  312.07   15.10
   4  -1   0  316.77   15.10
  -4  -1   0  312.57   15.00
  -4  -1   0  309.77   15.10
  -4  -1   0  313.97   14.90
   4  -1   0  326.07   15.00
   4  -1   0  322.37   15.10
  -4   1   0  307.67   15.00
   4   1   0  305.67   15.10
   4   1   0  311.47   15.00
   4   1   0  314.67   14.90
  -4   1   0  306.17   15.10
   4   1   0  320.67   15.10
  -4   1   0  308.47   15.10
  -5  -1   0  118.29    5.60
   5  -1   0  107.89    5.60
   5  -1   0  113.29    5.70
  -5  -1   0  115.39    5.50
   5  -1   0  111.69    5.50
  -5  -1   0  108.49    5.80
   5  -1   0  113.99    5.70
   5   1   0  112.39    5.40
   5   1   0  113.19    5.70
   5   1   0  110.89    5.70
   5   1   0  115.99    5.80
  -5   1   0  108.59    5.70
   5   1   0  111.09    5.60
  -5   1   0  108.89    5.70
  -5   1   0  107.09    5.50
   6  -1   0    3.70    0.90
   6  -1   0    2.30    1.00
   6  -1   0    3.00    1.10
  -6  -1   0    2.50    0.60
  -6  -1   0    2.10    1.00
   6  -1   0    3.90    0.70
  -6  -1   0    2.70    0.80
   6   1   0    3.50    1.00
  -6   1   0    1.50    1.00
  -6   1   0    2.20    0.70
   6   1   0    3.80    0.90
   6   1   0    2.70    0.60
   6   1   0    2.20    1.20
   6   1   0    1.10    0.80
   7  -1   0  143.69    7.30
  -7  -1   0  139.09    7.30
  -7  -1   0  144.29    7.10
   7  -1   0  143.29    6.90
  -7  -1   0  145.19    6.90
   7  -1   0  137.99    7.30
  -7   1   0  138.59    7.30
   7   1   0  141.29    7.30
   7   1   0  134.69    7.30
   7   1   0  145.69    6.90
   7   1   0  140.29    7.10
   7   1   0  137.59    7.20
   8  -1   0    0.80    0.90
   8  -1   0    1.10    0.80
  -8  -1   0    3.10    1.30
  -8  -1   0    1.40    1.10
   8  -1   0   -0.40    1.40
  -8  -1   0    0.70    0.60
   8   1   0    1.30    1.00
   8   1   0    1.20    1.00
  -8   1   0    1.60    1.10
  -9  -1   0   31.80    3.00
   9  -1   0   37.60    2.20
   9  -1   0   31.30    2.50
  -9  -1   0   29.00    2.70
  -9  -1   0   34.90    2.10
   9   1   0   30.70    2.10
  -9   1   0   31.10    2.90
   9   1   0   32.10    2.50
   9   1   0   34.90    2.80
 -10  -1   0  237.08   12.50
 -10  -1   0  250.47   12.10
 -10  -1   0  254.67   12.80
  10  -1   0  258.57   12.20
  10  -1   0  249.48   12.50
  10   1   0  253.47   12.10
 -10   1   0  255.47   12.80
  10   1   0  246.18   12.60
  10   1   0  247.08   12.40
  11  -1   0   12.70    1.80
  11  -1   0   11.80    1.40
 -11  -1   0    9.90    2.10
  11  -1   0   12.10    2.10
  11   1   0   12.10    2.00
  11   1   0   11.20    1.30
 -11   1   0   10.60    2.30
  11   1   0   13.10    1.90
  12  -1   0   67.69    3.90
  12  -1   0   65.69    4.50
  12  -1   0   64.59    4.90
 -12  -1   0   73.29    5.40
  12  -1   0   72.79    4.00
 -12   1   0   64.29    5.20
  12   1   0   62.89    4.90
  12   1   0   66.89    4.40
  13  -1   0    6.40    2.50
  13  -1   0    1.70    1.50
  13  -1   0    1.20    2.00
 -13  -1   0    6.30    2.70
  13   1   0    3.40    2.00
  13   1   0    3.70    2.30
 -13   1   0    6.60    2.70
  14  -1   0   23.00    3.00
 -14  -1   0   22.20    3.90
 -14   1   0   17.80    3.50
  14   1   0   20.20    2.80
  14   1   0   20.00    4.60
 -15  -1   0    1.40    3.70
  15  -1   0   -3.70    3.20
  15  -1   0   -4.90    2.50
  15   1   0    7.50    2.80
 -15   1   0    0.70    3.60
  15   1   0    1.70    3.10
 -16  -1   0   14.80    4.50
  16  -1   0   12.90    4.40
  16  -1   0   15.30    3.50
 -16   1   0    8.50    4.60
  16   1   0    9.80    3.20
  16   1   0   15.30    3.90
   0  -2   0  170.58    8.30
   0  -2   0  173.08    8.40
   0  -2   0  170.08    8.30
   0  -2   0  176.68    8.40
   0   2   0  173.18    8.30
   0   2   0  168.58    8.40
   0   2   0  176.38    8.30
   0   2   0  179.68    8.40
   1  -2   0    6.40    0.50
   1  -2   0    5.20    0.60
   1  -2   0    4.40    0.50
  -1  -2   0    5.00    0.50
   1  -2   0    5.80    0.60
  -1  -2   0    6.20    0.60
  -1  -2   0    5.00    0.60
  -1  -2   0    5.10    0.50
   1   2   0    4.70    0.50
   1   2   0    4.50    0.60
  -1   2   0    4.70    0.60
   1   2   0    5.00    0.60
   1   2   0    4.80    0.50
  -1   2   0    4.60    0.50
  -1   2   0    5.10    0.60
   2  -2   0    4.50    0.80
   2  -2   0    2.40    0.50
  -2  -2   0    4.10    0.50
  -2  -2   0    3.30    0.50
   2  -2   0    3.80    0.50
   2  -2   0    2.50    0.50
  -2  -2   0    2.40    0.50
  -2  -2   0    3.40    0.50
  -2   2   0    3.60    0.50
  -2   2   0    2.90    0.50
   2   2   0    3.10    0.50
   2   2   0    2.60    0.50
   2   2   0    3.80    0.50
  -2   2   0    3.30    0.50
   3  -2   0  523.05   24.80
  -3  -2   0  511.75   24.90
   3  -2   0  531.65   24.90
   3  -2   0  526.85   24.90
  -3  -2   0  519.55   24.80
   3   2   0  501.75   24.80
  -3   2   0  511.45   24.90
   3   2   0  528.35   24.90
   3   2   0  521.35   24.80
  -3   2   0  516.55   24.80
   3   2   0  538.25   24.90
   4  -2   0   77.09    3.90
  -4  -2   0   73.99    4.10
  -4  -2   0   79.49    3.90
  -4  -2   0   79.29    3.80
   4  -2   0   79.49    4.00
   4  -2   0   76.09    4.00
   4  -2   0   78.69    4.00
   4   2   0   78.09    3.80
   4   2   0   76.09    4.10
   4   2   0   75.29    4.00
  -4   2   0   73.29    4.00
   4   2   0   76.59    3.90
  -4   2   0   76.19    4.00
  -5  -2   0 1065.79   51.89
  -5  -2   0 1098.69   51.99
   5  -2   0 1114.99   52.09
   5  -2   0 1125.59   51.99
   5  -2   0 1061.79   51.99
  -5  -2   0 1081.59   52.09
   5  -2   0 1128.19   51.99
   5  -2   0 1127.09   52.09
   5   2   0 1064.19   51.99
  -5   2   0 1063.19   51.99
   5   2   0 1100.19   51.89
   5   2   0 1070.89   52.09
   5   2   0 1144.79   52.09
  -5   2   0 1054.69   51.99
   6  -2   0   42.40    2.60
   6  -2   0   44.80    2.70
   6  -2   0   42.50    2.50
   6  -2   0   45.40    2.70
   6  -2   0   41.80    2.70
  -6  -2   0   42.80    2.30
  -6  -2   0   45.50    2.90
  -6  -2   0   44.40    2.50
   6   2   0   42.70    2.70
   6   2   0   38.10    2.90
   6   2   0   40.70    2.50
  -6   2   0   41.60    2.80
   6   2   0   44.00    2.30
  -6   2   0   38.00    2.70
   7  -2   0  197.38    9.80
  -7  -2   0  201.08    9.40
  -7  -2   0  196.18    9.90
   7  -2   0  201.98    9.50
   7  -2   0  189.88    9.80
   7  -2   0  199.88    9.80
   7  -2   0  197.98    9.70
  -7  -2   0  199.48    9.60
   7   2   0  186.58    9.70
   7   2   0  191.68    9.90
  -7   2   0  192.48    9.80
   7   2   0  191.68    9.60
  -7   2   0  185.48    9.80
   7   2   0  197.48    9.80
   8  -2   0    4.10    1.40
   8  -2   0    7.70    1.60
  -8  -2   0    5.70    1.30
   8  -2   0    4.40    1.10
  -8  -2   0    3.10    1.20
   8  -2   0    4.70    0.90
  -8  -2   0    2.90    0.70
   8   2   0    3.80    0.80
   8   2   0    4.80    1.10
  -8   2   0    3.90    1.30
   8   2   0    4.10    1.20
   9  -2   0   30.30    2.20
  -9  -2   0   31.00    2.50
  -9  -2   0   29.10    1.90
   9  -2   0   29.90    2.50
   9  -2   0   25.00    2.50
  -9  -2   0   27.30    2.90
   9   2   0   28.10    2.70
   9   2   0   27.70    2.40
   9   2   0   29.10    2.00
  -9   2   0   29.80    2.90
  10  -2   0   -0.50    1.10
  10  -2   0   -0.50    1.10
 -10  -2   0    1.30    1.80
 -10  -2   0    0.60    0.90
  10  -2   0    1.80    1.30
 -10  -2   0    0.20    1.60
  10   2   0    0.80    0.90
  10   2   0   -2.10    1.20
 -10   2   0    1.30    1.70
  10   2   0   -0.20    1.50
 -11  -2   0   16.00    1.60
  11  -2   0   10.70    1.60
  11  -2   0   13.60    1.70
  11  -2   0    9.60    1.80
 -11  -2   0   10.20    2.20
  11   2   0   11.80    2.10
  11   2   0    9.30    1.90
 -11   2   0   15.90    2.30
  11   2   0   12.10    1.80
  12  -2   0    2.30    1.70
  12  -2   0    1.60    1.90
  12  -2   0    1.40    1.50
  12  -2   0    2.80    1.60
 -12  -2   0    0.10    2.30
 -12   2   0    2.90    2.10
  12   2   0    2.30    1.80
  12   2   0    0.30    1.90
  13  -2   0    0.10    1.80
  13  -2   0   -0.20    2.30
  13  -2   0    2.40    2.00
 -13  -2   0    0.90    2.70
  13   2   0    0.90    2.00
 -13   2   0    0.80    2.60
  13   2   0    3.90    2.30
 -14  -2   0   10.20    5.50
  14  -2   0    6.50    2.40
  14  -2   0   12.50    4.00
  14  -2   0    5.00    2.10
  14   2   0   10.10    2.50
 -14   2   0   -0.40    3.10
  14   2   0    7.30    2.90
  15  -2   0   -1.00    3.20
  15  -2   0   -2.30    2.70
 -15  -2   0    3.10    3.70
 -15   2   0    0.90    3.60
  15   2   0   -3.50    2.80
  15   2   0   -0.60    3.40
  16  -2   0    5.50    4.10
  16  -2   0    8.70    3.60
 -16  -2   0   -0.20    4.20
 -16   2   0    9.50    4.20
  16   2   0    8.80    3.70
  16   2   0    3.40    3.30
   0  -3   0   -0.10    0.30
   0  -3   0   -0.60    0.50
   0  -3   0    0.50    0.50
   0  -3   0    0.20    0.30
   0   3   0   -0.10    0.30
   0   3   0   -0.20    0.50
   0   3   0   -0.50    0.30
   0   3   0    0.40    0.50
  -1  -3   0 1249.97   59.89
   1  -3   0 1351.06   59.89
   1  -3   0 1261.27   59.89
   1  -3   0 1237.38   59.79
  -1  -3   0 1228.28   59.79
  -1  -3   0 1214.18   59.89
  -1  -3   0 1277.47   59.79
   1  -3   0 1234.78   59.89
   1   3   0 1191.28   59.79
   1   3   0 1230.58   59.89
   1   3   0 1278.87   59.89
  -1   3   0 1443.66   59.99
  -1   3   0 1286.97   59.89
  -1   3   0 1217.48   59.79
  -1   3   0 1220.58   59.89
   1   3   0 1247.98   59.79
   2  -3   0    3.00    0.50
   2  -3   0    3.80    0.60
  -2  -3   0    3.50    0.60
  -2  -3   0    2.70    0.60
   2  -3   0    2.70    0.60
   2  -3   0    2.80    0.70
   2  -3   0    3.30    0.40
  -2  -3   0    3.30    0.50
  -2  -3   0    3.10    0.60
   2   3   0    3.30    0.60
  -2   3   0    2.70    0.70
   2   3   0    3.10    0.60
   2   3   0    3.10    0.60
   2   3   0    3.60    0.50
  -2   3   0    2.40    0.50
   3  -3   0  552.44   26.00
   3  -3   0  543.15   25.90
   3  -3   0  560.44   26.00
  -3  -3   0  559.64   26.00
  -3  -3   0  531.75   25.90
   3  -3   0  536.45   26.00
  -3  -3   0  552.04   26.00
  -3  -3   0  529.45   26.00
   3   3   0  567.04   26.00
  -3   3   0  538.15   26.00
   3   3   0  549.85   26.00
  -3   3   0  525.55   26.00
   3   3   0  541.85   26.00
   3   3   0  526.75   26.00
  -4  -3   0  459.65   21.80
   4  -3   0  469.15   21.90
  -4  -3   0  446.26   22.00
   4  -3   0  455.95   21.90
   4  -3   0  456.55   21.90
   4  -3   0  458.75   22.00
  -4  -3   0  468.85   21.90
  -4  -3   0  461.65   21.90
   4  -3   0  445.86   21.90
   4   3   0  476.55   22.00
   4   3   0  457.85   21.80
  -4   3   0  445.76   21.90
  -4   3   0  455.45   21.90
   4   3   0  444.36   21.90
   4   3   0  452.15   21.90
   5  -3   0 1837.02   83.49
   5  -3   0 1825.02   83.49
  -5  -3   0 1588.64   83.89
   5  -3   0 1800.62   83.49
   5  -3   0 1745.13   83.39
  -5  -3   0 1732.23   83.29
   5  -3   0 1858.81   83.49
  -5  -3   0 1754.42   83.39
   5   3   0 1839.82   83.49
   5   3   0 1794.12   83.29
  -5   3   0 1705.73   83.49
   5   3   0 1709.03   83.39
   5   3   0 1651.43   83.49
  -5   3   0 1739.23   83.39
   6  -3   0    2.70    1.00
  -6  -3   0    2.40    0.70
   6  -3   0    3.90    1.10
  -6  -3   0    4.90    0.90
   6  -3   0    4.20    0.90
   6  -3   0    2.30    0.80
   6  -3   0    0.80    0.90
   6  -3   0    2.40    1.10
  -6  -3   0    2.60    1.10
   6   3   0    2.60    1.20
   6   3   0    1.30    0.90
  -6   3   0    2.70    1.00
   6   3   0    4.40    1.00
   6   3   0    1.90    0.70
  -6   3   0    3.30    1.00
   7  -3   0    6.40    1.30
   7  -3   0    4.30    1.00
   7  -3   0    4.10    1.30
  -7  -3   0    5.40    1.30
   7  -3   0    5.50    1.20
  -7  -3   0    5.40    0.80
   7  -3   0    3.90    1.00
  -7  -3   0    7.10    1.10
   7  -3   0    7.40    1.50
   7   3   0    5.10    0.90
  -7   3   0    5.40    1.10
   7   3   0    5.20    1.40
   7   3   0    4.50    1.00
  -7   3   0    4.80    1.20
  -8  -3   0    3.70    1.20
   8  -3   0    4.90    1.10
   8  -3   0    5.20    1.10
   8  -3   0    4.20    1.40
   8  -3   0    2.10    1.10
  -8  -3   0    4.20    0.80
  -8  -3   0    1.90    1.40
   8  -3   0    4.10    1.50
  -8   3   0    2.10    1.30
   8   3   0    5.30    1.20
  -8   3   0    4.50    1.20
   8   3   0    4.90    1.20
   8   3   0    4.20    0.90
   9  -3   0    1.80    1.20
  -9  -3   0   -0.60    1.30
  -9  -3   0    1.20    1.50
   9  -3   0    2.90    1.30
  -9  -3   0    2.40    0.80
   9   3   0    2.60    1.30
   9   3   0    1.90    1.30
  -9   3   0    1.70    1.40
   9   3   0    2.00    0.90
  10  -3   0    0.80    1.70
 -10  -3   0    4.20    1.80
 -10  -3   0    3.80    1.00
  10  -3   0    2.70    1.30
  10  -3   0    4.60    1.50
  10   3   0    3.50    1.50
  10   3   0    3.70    1.10
  10   3   0    4.60    1.70
 -10   3   0    1.00    1.60
  11  -3   0   38.00    3.20
 -11  -3   0   38.40    3.60
  11  -3   0   37.00    3.20
 -11  -3   0   37.50    2.40
  11  -3   0   43.00    3.00
  11   3   0   36.80    3.30
  11   3   0   31.00    2.60
 -11   3   0   39.30    3.80
  11   3   0   34.50    3.70
  12  -3   0    1.40    1.80
  12  -3   0   -1.00    1.60
  12  -3   0   -2.50    1.60
 -12  -3   0   -2.30    2.20
 -12   3   0    3.30    2.30
  12   3   0   -2.30    1.80
  12   3   0    2.00    2.00
  13  -3   0   -1.50    2.40
 -13  -3   0   -0.70    2.70
  13  -3   0    2.30    2.00
  13  -3   0   -2.90    1.80
 -13   3   0    1.30    2.60
  13   3   0    0.80    2.30
  13   3   0   -0.10    2.10
 -14  -3   0    5.20    3.50
  14  -3   0   -1.70    2.80
  14  -3   0    0.90    2.30
  14  -3   0    4.60    2.10
  14   3   0   -1.40    2.60
  14   3   0    2.40    2.50
 -14   3   0    2.50    3.00
  15  -3   0    9.10    3.50
  15  -3   0    3.60    2.70
 -15  -3   0   11.60    4.10
  15   3   0   12.00    3.00
 -15   3   0   10.30    4.30
  15   3   0   13.40    3.30
 -16  -3   0    6.50    4.80
  16  -3   0   16.80    4.40
  16  -3   0   14.40    3.50
  16   3   0   18.20    3.70
  16   3   0    8.20    4.10
 -16   3   0    2.00    4.20
   0  -4   0   16.30    1.20
   0  -4   0   14.40    1.40
   0  -4   0   15.00    1.10
   0  -4   0   16.10    1.40
   0   4   0   14.80    1.40
   0   4   0   16.80    1.10
   0   4   0   14.80    1.10
   0   4   0   15.70    1.40
  -1  -4   0   11.10    1.00
  -1  -4   0   10.80    1.10
  -1  -4   0   11.00    1.00
   1  -4   0   12.10    1.00
   1  -4   0   11.80    1.30
  -1  -4   0   15.30    1.20
   1  -4   0   13.40    1.20
   1  -4   0   12.10    0.90
   1   4   0   10.70    1.20
   1   4   0   10.50    1.10
   1   4   0   11.50    1.10
  -1   4   0   11.50    1.00
  -1   4   0   11.30    1.20
  -1   4   0   12.40    0.90
  -1   4   0   10.30    1.10
   1   4   0   12.60    1.00
   2  -4   0  372.96   17.90
  -2  -4   0  358.96   17.80
  -2  -4   0  363.36   17.80
  -2  -4   0  375.16   17.80
   2  -4   0  349.27   17.90
   2  -4   0  375.86   17.70
  -2  -4   0  380.46   17.80
   2  -4   0  374.76   17.70
   2   4   0  365.76   17.80
   2   4   0  369.16   17.80
   2   4   0  379.46   17.80
  -2   4   0  367.86   17.80
  -2   4   0  370.66   17.90
   2   4   0  383.86   17.80
   3  -4   0    0.20    0.60
   3  -4   0    1.00    0.80
  -3  -4   0    0.80    0.70
  -3  -4   0    0.10    0.70
  -3  -4   0    0.00    0.80
   3  -4   0    0.80    0.90
  -3  -4   0    0.00    0.70
   3  -4   0    0.00    0.70
   3  -4   0    0.50    0.60
   3   4   0    0.80    0.70
  -3   4   0    0.00    0.80
   3   4   0   -1.30    0.70
  -3   4   0    0.20    0.70
   3   4   0    0.30    0.70
   3   4   0    0.50    0.70
   4  -4   0   70.19    4.00
   4  -4   0   73.29    3.80
  -4  -4   0   74.99    3.90
   4  -4   0   71.49    3.90
  -4  -4   0   71.79    3.80
  -4  -4   0   73.39    3.80
   4  -4   0   74.19    4.10
   4  -4   0   69.29    3.90
  -4  -4   0   71.99    4.00
   4   4   0   71.89    3.90
   4   4   0   66.59    3.90
   4   4   0   75.69    4.00
   4   4   0   73.19    3.80
  -4   4   0   69.89    3.90
   5  -4   0    2.40    1.00
  -5  -4   0    1.60    0.80
  -5  -4   0    2.30    1.00
  -5  -4   0    1.80    0.90
  -5  -4   0    3.40    0.80
   5  -4   0    1.80    1.10
   5  -4   0    4.80    1.10
   5  -4   0    2.80    1.00
   5  -4   0    1.20    0.80
   5   4   0    2.60    1.10
  -5   4   0    2.10    0.90
   5   4   0    1.90    1.20
   5   4   0    1.60    0.90
   5   4   0    2.30    0.80
  -6  -4   0   63.89    3.70
  -6  -4   0   64.79    3.60
   6  -4   0   73.89    3.80
   6  -4   0   68.99    3.70
   6  -4   0   66.69    4.00
  -6  -4   0   66.39    4.00
   6  -4   0   69.59    3.90
  -6   4   0   67.59    3.80
  -6   4   0   65.89    3.80
   6   4   0   60.79    4.00
   6   4   0   64.29    3.80
   6   4   0   66.99    3.60
   7  -4   0   21.70    2.10
   7  -4   0   21.20    2.10
  -7  -4   0   22.80    2.00
   7  -4   0   22.00    2.20
  -7  -4   0   23.30    1.70
   7  -4   0   23.40    2.20
   7  -4   0   20.10    2.00
   7  -4   0   24.40    2.10
  -7  -4   0   20.00    2.10
   7   4   0   22.30    2.10
   7   4   0   20.50    1.90
   7   4   0   20.80    2.10
  -7   4   0   19.30    2.00
  -7   4   0   25.20    2.10
   8  -4   0    7.40    1.50
  -8  -4   0    8.70    1.10
   8  -4   0    6.10    1.50
  -8  -4   0    9.90    1.70
  -8  -4   0    9.50    1.40
   8  -4   0    7.30    1.60
   8  -4   0    9.80    1.50
   8   4   0    9.90    1.30
   8   4   0    8.60    1.40
  -8   4   0    6.20    1.40
  -8   4   0    7.60    1.50
   8   4   0    8.70    1.40
  -9  -4   0   10.90    1.90
  -9  -4   0   13.00    1.70
   9  -4   0   10.40    1.60
   9  -4   0    7.10    1.60
   9  -4   0   12.80    1.70
   9  -4   0   11.70    2.20
  -9  -4   0   11.70    1.20
  -9   4   0   10.10    1.80
  -9   4   0    9.80    1.60
   9   4   0   12.30    1.70
   9   4   0    8.80    1.40
   9   4   0   12.20    1.60
 -10  -4   0   61.49    3.50
  10  -4   0   57.59    4.10
 -10  -4   0   62.19    4.70
  10  -4   0   63.59    4.00
  10  -4   0   65.99    4.10
 -10   4   0   62.79    4.30
  10   4   0   62.89    3.80
  10   4   0   62.19    4.10
  10   4   0   67.09    4.20
 -11  -4   0    3.00    1.10
  11  -4   0    2.70    1.80
  11  -4   0    4.70    1.70
 -11  -4   0    3.20    2.20
  11  -4   0    1.10    1.60
  11   4   0    2.40    1.80
 -11   4   0    1.20    1.90
  11   4   0    4.20    1.80
  11   4   0    4.80    1.50
  12  -4   0    7.10    2.00
 -12  -4   0    6.10    1.30
 -12  -4   0    2.00    2.50
  12  -4   0    6.80    2.10
  12   4   0    8.90    2.30
 -12   4   0    6.00    2.30
  12   4   0    7.20    2.10
  13  -4   0   -2.10    2.00
  13  -4   0   -0.90    2.10
 -13  -4   0    1.60    2.70
  13   4   0    1.60    2.30
 -13   4   0   -3.20    2.50
  13   4   0   -0.40    2.20
  14  -4   0   -0.30    2.30
  14  -4   0    1.10    3.00
 -14  -4   0   -2.70    3.40
  14  -4   0   -0.70    2.30
 -14   4   0   -2.10    3.10
  14   4   0    0.10    2.80
  14   4   0    2.50    2.60
 -15  -4   0    0.90    3.80
  15  -4   0   13.20    3.90
  15  -4   0   10.30    3.00
  15   4   0    9.90    3.20
  15   4   0    8.70    3.50
 -16  -4   0    6.80    4.70
  16  -4   0    2.20    3.40
  16  -4   0    7.20    4.30
 -16   4   0    1.70    4.50
  16   4   0    1.20    3.80
  16   4   0    6.30    3.60
   0  -5   0   -0.10    0.90
   0  -5   0   -0.10    0.90
   0  -5   0   -0.50    0.60
   0  -5   0    0.40    0.60
   0   5   0    1.20    0.90
   0   5   0    0.10    0.60
   0   5   0    0.90    0.70
   0   5   0    0.90    0.90
   1  -5   0   51.69    2.80
   1  -5   0   54.69    2.90
  -1  -5   0   51.29    3.10
  -1  -5   0   57.09    3.10
   1  -5   0   51.39    3.10
   1  -5   0   54.59    3.10
  -1  -5   0   51.59    2.80
  -1  -5   0   49.90    2.90
   1   5   0   56.19    2.90
  -1   5   0   53.49    2.90
   1   5   0   54.19    3.20
  -1   5   0   52.69    2.70
   1   5   0   50.59    3.10
   1   5   0   53.29    2.90
  -1   5   0   52.09    3.20
  -1   5   0   50.99    3.10
  -2  -5   0   10.90    1.20
  -2  -5   0    9.50    1.30
  -2  -5   0   12.00    1.20
   2  -5   0   10.40    1.00
   2  -5   0   11.10    1.10
   2  -5   0   13.00    1.40
  -2  -5   0   10.70    1.00
   2   5   0    8.80    1.20
   2   5   0   11.90    1.10
   2   5   0    9.30    1.20
   2   5   0   14.00    1.10
  -2   5   0    9.90    1.10
   3  -5   0   46.60    2.70
  -3  -5   0   47.00    2.80
   3  -5   0   49.00    2.50
  -3  -5   0   47.50    2.70
   3  -5   0   44.70    3.00
   3  -5   0   43.80    2.60
   3  -5   0   38.70    3.20
  -3  -5   0   43.10    2.80
  -3  -5   0   45.10    2.80
   3   5   0   46.30    2.70
   3   5   0   48.50    2.90
   3   5   0   43.60    2.90
   3   5   0   47.50    2.80
  -3   5   0   44.90    2.90
  -3   5   0   44.50    2.70
   4  -5   0  349.77   17.50
   4  -5   0  370.96   17.40
   4  -5   0  362.26   17.20
  -4  -5   0  367.16   17.40
  -4  -5   0  331.57   17.60
  -4  -5   0  356.66   17.40
   4  -5   0  370.66   17.60
  -4  -5   0  374.76   17.40
   4  -5   0  363.36   17.30
   4   5   0  339.27   17.70
  -4   5   0  365.86   17.40
   4   5   0  359.66   17.40
   4   5   0  371.06   17.40
  -4   5   0  348.57   17.50
   4   5   0  359.76   17.40
   5  -5   0    9.20    1.00
   5  -5   0    6.80    1.20
   5  -5   0    5.80    1.20
  -5  -5   0    5.60    1.00
  -5  -5   0    6.50    1.10
  -5  -5   0    8.80    1.10
   5  -5   0    7.30    1.20
   5  -5   0    6.30    1.40
  -5  -5   0    5.40    1.30
   5   5   0    7.40    1.20
   5   5   0    6.70    1.20
  -5   5   0    5.90    1.20
   5   5   0    5.40    1.00
   5   5   0    7.70    1.20
  -5   5   0    5.60    1.10
  -6  -5   0   21.60    2.30
  -6  -5   0   19.10    2.00
   6  -5   0   21.40    1.90
   6  -5   0   22.10    2.30
   6  -5   0   24.20    2.00
   6  -5   0   18.40    2.10
   6  -5   0   19.30    1.80
  -6  -5   0   21.40    2.10
  -6  -5   0   20.10    1.80
   6   5   0   20.70    2.00
  -6   5   0   19.10    2.00
   6   5   0   19.50    2.00
   6   5   0   21.60    2.10
   6   5   0   20.50    2.00
  -7  -5   0    0.00    0.90
   7  -5   0   -1.50    1.20
   7  -5   0   -0.30    1.20
   7  -5   0   -0.30    1.20
  -7  -5   0    0.00    1.30
   7  -5   0   -0.60    1.40
  -7  -5   0   -0.30    1.20
  -7   5   0   -0.80    1.00
   7   5   0   -0.20    1.10
   7   5   0    0.50    1.20
   7   5   0   -0.60    1.20
   8  -5   0   -1.50    1.30
   8  -5   0   -1.40    1.40
   8  -5   0    0.40    1.50
   8  -5   0   -1.30    1.30
  -8  -5   0   -0.50    1.00
  -8  -5   0   -1.50    1.50
  -8  -5   0   -0.60    1.30
   8   5   0    0.50    1.20
   8   5   0    1.40    1.30
  -8   5   0   -1.20    1.20
   8   5   0   -2.40    1.30
  -8   5   0    0.00    1.20
   9  -5   0   32.00    3.10
   9  -5   0   36.70    3.40
   9  -5   0   28.10    2.90
  -9  -5   0   35.60    2.50
   9  -5   0   38.40    3.10
  -9  -5   0   31.70    3.50
  -9   5   0   38.40    3.20
   9   5   0   34.20    3.00
   9   5   0   33.50    2.90
   9   5   0   33.70    3.10
  -9   5   0   37.40    3.10
 -10  -5   0    1.30    1.20
  10  -5   0    1.40    1.70
 -10  -5   0    4.90    2.00
  10  -5   0    0.50    1.90
  10  -5   0    2.60    1.80
  10   5   0    2.20    1.60
 -10   5   0    2.40    1.60
  10   5   0    0.00    1.60
 -10   5   0    1.10    1.50
  10   5   0    1.90    1.70
 -11  -5   0    9.20    2.60
  11  -5   0   11.30    2.10
  11  -5   0   15.00    2.30
 -11  -5   0   13.10    1.60
 -11   5   0   16.90    2.30
  11   5   0   16.80    2.20
  11   5   0   15.20    2.40
  11   5   0   12.00    1.90
  12  -5   0    3.80    2.00
 -12  -5   0    0.70    1.30
 -12  -5   0    4.80    2.60
  12  -5   0   -3.00    2.00
  12   5   0    1.70    2.10
  12   5   0    4.00    2.10
 -12   5   0    0.50    2.20
  13  -5   0   -2.10    2.30
  13  -5   0   -1.10    2.20
 -13  -5   0   -0.50    4.30
  13   5   0    0.50    2.50
  13   5   0    1.10    2.50
 -13   5   0    2.50    2.70
  14  -5   0   10.40    2.80
  14  -5   0    7.90    2.70
 -14  -5   0    3.40    3.70
 -14   5   0    9.60    3.30
  14   5   0   14.00    3.00
  14   5   0    2.40    2.90
  15  -5   0    6.30    3.10
 -15  -5   0   13.20    4.50
  15  -5   0   13.00    4.20
  15   5   0    8.00    3.60
  15   5   0   17.10    3.50
   0  -6   0   27.40    2.30
   0  -6   0   27.00    1.80
   0  -6   0   28.10    1.80
   0  -6   0   24.40    2.20
   0   6   0   28.30    1.90
   0   6   0   26.50    2.40
   0   6   0   28.00    2.30
   0   6   0   30.20    1.80
   1  -6   0  102.59    5.70
   1  -6   0  108.79    5.30
  -1  -6   0  106.69    5.70
   1  -6   0  106.09    5.70
  -1  -6   0  108.19    5.40
   1  -6   0  111.19    5.40
  -1  -6   0   98.69    5.60
  -1  -6   0  109.09    5.40
  -1   6   0  108.89    5.40
   1   6   0  109.59    5.70
  -1   6   0  108.49    5.30
   1   6   0  110.09    5.40
  -1   6   0  106.39    5.70
   1   6   0  103.79    5.40
   1   6   0  102.19    5.60
  -1   6   0  108.99    5.80
   2  -6   0    2.20    1.10
  -2  -6   0    1.90    0.80
  -2  -6   0    3.70    1.10
   2  -6   0    0.20    1.20
   2  -6   0    2.80    0.80
  -2  -6   0    2.70    0.80
   2  -6   0    2.10    1.00
  -2  -6   0    2.90    1.20
   2   6   0    3.20    0.80
   2   6   0    3.60    0.90
  -2   6   0    3.00    0.80
   2   6   0    4.30    1.20
  -2   6   0    2.90    1.00
   2   6   0    2.80    1.00
   3  -6   0    0.80    1.00
   3  -6   0    0.60    1.20
  -3  -6   0    0.80    0.90
   3  -6   0   -0.60    0.60
   3  -6   0    0.40    0.70
  -3  -6   0    2.30    1.10
  -3  -6   0   -1.30    0.80
   3  -6   0    0.40    0.60
   3   6   0   -2.30    1.00
   3   6   0   -1.00    0.90
   3   6   0    0.30    0.80
  -3   6   0    1.70    1.10
  -3   6   0    0.50    0.80
   3   6   0    1.30    1.00
   4  -6   0   22.60    2.00
   4  -6   0   19.80    1.90
  -4  -6   0   18.10    1.70
   4  -6   0   16.40    1.70
  -4  -6   0   18.70    1.60
   4  -6   0   17.80    1.50
   4  -6   0   17.00    1.40
  -4  -6   0   21.40    1.90
  -4  -6   0   17.90    1.90
   4   6   0   21.60    2.20
  -4   6   0   20.20    1.90
   4   6   0   15.90    1.70
   4   6   0   18.40    2.00
   4   6   0   18.50    1.60
  -5  -6   0    7.20    1.30
   5  -6   0    9.30    1.60
   5  -6   0    6.10    1.20
  -5  -6   0    6.40    1.20
  -5  -6   0    4.20    1.10
   5  -6   0   10.10    1.10
  -5  -6   0    6.40    1.30
   5  -6   0    5.70    1.40
   5  -6   0    8.00    1.00
  -5   6   0    6.30    1.20
   5   6   0    8.50    1.40
   5   6   0    5.30    1.40
  -5   6   0    5.60    1.30
   5   6   0    8.70    1.50
   5   6   0    5.20    1.10
   6  -6   0    4.70    1.50
   6  -6   0    2.80    1.20
  -6  -6   0    2.40    1.20
   6  -6   0    4.60    1.00
  -6  -6   0    4.50    1.10
   6  -6   0    2.80    1.30
  -6  -6   0    4.20    1.30
   6  -6   0    4.90    1.30
  -6  -6   0    4.50    1.40
  -6   6   0    3.30    1.20
   6   6   0    3.60    1.40
  -6   6   0    4.90    1.50
   6   6   0    4.60    1.10
   6   6   0    2.60    1.20
  -7  -6   0    7.60    1.60
  -7  -6   0    9.50    1.40
   7  -6   0    9.20    2.90
   7  -6   0   10.20    1.50
  -7  -6   0    8.20    1.70
   7  -6   0    9.80    1.60
   7   6   0    8.30    1.60
   7   6   0    9.40    1.40
  -7   6   0    6.70    1.50
   7   6   0    8.90    1.70
  -8  -6   0    1.30    1.10
   8  -6   0    1.50    1.60
  -8  -6   0    0.80    1.60
   8  -6   0    0.40    1.60
   8   6   0    4.10    1.40
   8   6   0    0.80    1.60
  -8   6   0    0.40    1.40
   8   6   0    1.60    1.50
  -9  -6   0    0.40    1.20
  -9  -6   0    2.20    1.70
   9  -6   0    2.80    1.60
   9  -6   0    0.60    1.90
   9  -6   0    3.40    1.80
   9   6   0    2.10    1.50
   9   6   0    2.60    1.70
   9   6   0    1.90    1.60
  -9   6   0    4.00    1.60
  10  -6   0   -1.70    1.80
 -10  -6   0   -2.00    1.30
 -10  -6   0    1.50    2.10
  10  -6   0   -0.50    1.80
  10   6   0   -1.00    1.70
  10   6   0    0.10    1.90
 -10   6   0    0.90    1.70
  10   6   0    0.90    1.80
  11  -6   0    6.70    2.20
 -11  -6   0    2.40    2.40
  11  -6   0    4.60    2.10
 -11  -6   0    2.50    1.70
  11   6   0    9.40    2.20
  11   6   0    2.50    1.90
  12  -6   0   -3.20    2.40
  12  -6   0   -2.60    2.10
 -12  -6   0   -1.10    2.70
  12   6   0   -1.20    2.30
  12   6   0    0.20    2.10
  13  -6   0    5.50    2.70
  13  -6   0    0.70    2.50
 -13  -6   0    0.70    3.20
  13   6   0    0.30    3.00
  13   6   0    2.90    2.80
  14  -6   0    0.40    3.20
 -14  -6   0    3.40    4.00
  14  -6   0   -1.00    2.90
  14   6   0    2.40    3.10
  14   6   0    4.10    3.10
  15  -6   0    3.00    3.00
 -15  -6   0    2.00    4.70
  15   6   0    3.10    3.50
  15   6   0    6.50    3.70
   0  -7   0   -0.20    1.20
   0  -7   0    1.10    0.80
   0  -7   0    0.10    1.10
   0  -7   0    0.70    0.70
   0   7   0    1.10    1.00
   0   7   0    0.00    0.70
   0   7   0    1.30    1.40
   0   7   0    0.80    0.80
  -1  -7   0   65.79    3.40
   1  -7   0   56.79    3.80
   1  -7   0   58.89    3.70
   1  -7   0   60.59    3.20
  -1  -7   0   57.99    3.70
  -1  -7   0   55.69    3.70
  -1  -7   0   60.59    3.30
   1  -7   0   62.79    3.30
   1   7   0   60.69    3.40
   1   7   0   62.09    3.40
  -1   7   0   53.99    3.70
  -1   7   0   63.59    3.20
  -1   7   0   59.89    3.40
   1   7   0   59.19    3.90
   1   7   0   58.99    3.70
   2  -7   0   -0.20    1.10
  -2  -7   0    1.70    0.90
   2  -7   0    1.10    0.70
   2  -7   0    1.40    0.80
  -2  -7   0   -0.10    0.80
  -2  -7   0    0.70    1.30
  -2  -7   0    1.50    1.10
   2  -7   0    4.10    1.40
  -2   7   0    1.30    1.10
   2   7   0    1.80    0.90
   2   7   0    3.10    1.00
   2   7   0    0.90    1.10
  -2   7   0    0.10    0.90
   2   7   0   -0.40    1.40
  -3  -7   0    1.40    1.00
   3  -7   0   -0.20    0.90
   3  -7   0    2.20    1.20
  -3  -7   0    1.80    1.10
   3  -7   0   -0.80    0.70
  -3  -7   0    2.40    1.00
  -3  -7   0    0.10    1.20
   3  -7   0    0.30    0.80
   3   7   0   -1.50    1.40
   3   7   0   -1.40    1.00
   3   7   0    0.20    1.10
  -3   7   0    0.50    1.20
   3   7   0    0.80    0.80
   4  -7   0   11.40    1.10
  -4  -7   0    7.00    1.30
  -4  -7   0   12.40    1.70
   4  -7   0   11.50    1.10
   4  -7   0   10.60    1.30
  -4  -7   0   11.00    1.50
   4  -7   0   10.80    1.70
  -4  -7   0   12.20    1.40
  -4   7   0    9.50    1.50
   4   7   0   11.00    1.50
   4   7   0   12.30    1.70
  -4   7   0    8.40    1.30
   4   7   0   12.60    1.80
   4   7   0   11.90    1.30
   5  -7   0   37.80    2.30
  -5  -7   0   33.20    2.70
   5  -7   0   35.80    2.90
   5  -7   0   35.00    3.00
   5  -7   0   36.60    2.50
  -5  -7   0   36.30    2.70
  -5  -7   0   38.00    2.90
  -5  -7   0   36.40    3.00
   5   7   0   35.80    2.60
   5   7   0   36.50    2.90
  -5   7   0   34.70    2.60
   5   7   0   35.50    3.20
  -5   7   0   35.70    3.00
   5   7   0   36.70    2.90
  -6  -7   0    7.10    1.40
   6  -7   0    6.10    1.10
   6  -7   0    8.10    1.70
   6  -7   0    6.30    1.60
  -6  -7   0    4.40    1.60
   6  -7   0    7.00    1.30
   6   7   0    6.80    1.30
   6   7   0    7.40    1.60
   6   7   0    5.10    1.80
  -6   7   0    3.60    1.70
  -6   7   0    4.90    1.30
   7  -7   0    0.20    1.40
   7  -7   0   -0.70    1.60
   7  -7   0    1.30    1.50
  -7  -7   0    0.80    1.60
  -7  -7   0    2.30    1.20
   7   7   0    1.60    1.20
  -7   7   0   -0.60    1.20
   7   7   0    1.50    1.80
   7   7   0    1.70    1.60
   8  -7   0    1.80    1.80
  -8  -7   0    0.50    1.80
  -8  -7   0    5.20    1.40
   8  -7   0    4.60    1.80
   8  -7   0    2.00    1.30
   8   7   0    3.40    2.00
  -8   7   0    2.70    1.40
   8   7   0    3.90    1.70
   8   7   0    4.10    1.50
  -9  -7   0   15.10    1.80
   9  -7   0   15.80    2.40
   9  -7   0   13.20    2.40
  -9  -7   0   18.60    2.60
   9   7   0   12.90    2.40
  -9   7   0   14.20    2.10
   9   7   0   20.30    2.30
   9   7   0   13.90    2.10
  10  -7   0    3.00    2.00
 -10  -7   0   -0.10    2.20
  10  -7   0    2.40    2.10
 -10  -7   0    0.10    1.40
  10   7   0   -0.10    1.70
  10   7   0    2.60    2.10
 -10   7   0   -0.60    1.90
  10   7   0    4.20    2.30
 -11  -7   0   15.10    2.00
  11  -7   0   12.60    2.80
  11  -7   0   18.50    2.80
 -11  -7   0   19.20    3.00
  11   7   0   16.50    2.70
 -11   7   0   15.40    2.50
  11   7   0   18.40    2.70
  12  -7   0    3.10    2.70
  12  -7   0    0.40    2.40
 -12  -7   0    3.10    1.80
  12   7   0    1.80    2.50
  12   7   0    1.70    2.50
 -13  -7   0    1.50    3.40
  13  -7   0    4.60    3.00
  13   7   0    5.70    2.80
  13   7   0   13.80    3.20
  14  -7   0    1.40    3.40
  14  -7   0   -2.30    3.10
 -14  -7   0   -0.10    4.30
  14   7   0    2.00    3.30
  14   7   0    4.70    3.20
  15  -7   0   -2.50    3.40
 -15  -7   0    2.20    4.50
  15   7   0    0.30    3.80
  15   7   0   -8.30    3.70
   0  -8   0   22.50    2.10
   0  -8   0   20.00    1.60
   0  -8   0   18.40    1.60
   0   8   0   17.70    1.70
   0   8   0   18.80    2.00
   1  -8   0    8.90    1.20
  -1  -8   0    8.90    1.20
  -1  -8   0    8.60    1.50
   1  -8   0   10.00    1.10
  -1  -8   0    8.80    1.20
   1  -8   0   10.30    1.60
   1   8   0    6.60    1.20
   1   8   0    6.80    1.20
  -1   8   0    7.40    1.00
   1   8   0   10.90    1.80
  -1   8   0    8.90    1.60
  -1   8   0    6.80    1.70
  -2  -8   0   31.20    2.80
  -2  -8   0   33.20    2.40
  -2  -8   0   29.70    2.40
   2  -8   0   33.30    2.40
   2  -8   0   32.10    2.90
   2  -8   0   34.00    2.10
   2   8   0   29.10    2.70
   2   8   0   31.40    2.40
  -2   8   0   33.10    2.40
   2   8   0   34.00    2.40
  -2   8   0   32.70    2.90
  -3  -8   0   54.79    3.30
   3  -8   0   44.50    3.60
   3  -8   0   53.49    2.90
   3  -8   0   49.50    3.20
  -3  -8   0   52.39    3.60
  -3  -8   0   51.99    3.30
   3  -8   0   52.79    2.90
   3   8   0   51.09    3.50
   3   8   0   53.49    3.20
   3   8   0   57.19    3.50
  -3   8   0   44.80    3.60
  -3   8   0   49.50    3.20
   4  -8   0  163.88    8.10
   4  -8   0  169.58    8.20
  -4  -8   0  166.88    8.60
  -4  -8   0  168.38    8.50
   4  -8   0  167.68    8.80
   4  -8   0  158.08    8.40
  -4  -8   0  162.28    8.50
   4   8   0  164.28    8.60
  -4   8   0  164.48    8.40
  -4   8   0  169.88    8.80
   4   8   0  164.58    8.40
   4   8   0  166.58    8.50
   5  -8   0   13.40    2.00
   5  -8   0   10.20    1.70
   5  -8   0   16.80    1.60
   5  -8   0   14.10    1.30
  -5  -8   0   12.50    1.80
  -5  -8   0   11.90    1.70
   5   8   0   13.50    2.00
  -5   8   0   16.40    1.70
  -5   8   0   12.10    2.00
   5   8   0   13.90    1.60
   6  -8   0    4.90    1.40
   6  -8   0    4.70    1.80
   6  -8   0    3.40    1.10
  -6  -8   0    3.40    1.40
  -6  -8   0    2.20    1.60
   6   8   0    4.20    1.70
  -6   8   0    4.30    1.80
  -6   8   0    2.00    1.40
   6   8   0    3.70    1.20
  -7  -8   0    4.00    1.50
  -7  -8   0    2.00    1.70
   7  -8   0    0.90    1.70
   7  -8   0    3.30    1.50
   7   8   0   -0.30    1.70
  -7   8   0    2.20    1.50
   7   8   0    1.10    1.30
   8  -8   0   78.89    5.20
   8  -8   0   69.59    4.70
   8  -8   0   67.09    4.30
  -8  -8   0   75.19    4.50
  -8  -8   0   73.29    5.10
   8   8   0   77.69    5.00
   8   8   0   77.49    4.70
  -8   8   0   76.89    4.80
   9  -8   0   -2.30    1.40
   9  -8   0    1.00    2.00
   9  -8   0    2.40    2.20
  -9  -8   0   -0.30    2.00
  -9  -8   0   -2.40    1.50
  -9   8   0   -2.20    1.70
   9   8   0    0.70    2.20
   9   8   0   -2.50    1.60
 -10  -8   0    8.00    2.70
  10  -8   0    8.40    2.50
  10  -8   0    8.20    2.50
  10  -8   0    9.10    1.90
 -10  -8   0    7.60    1.80
  10   8   0    7.40    2.10
  10   8   0   12.50    2.50
 -10   8   0    7.60    2.30
  11  -8   0   -0.30    1.90
  11  -8   0   -0.30    2.50
  11  -8   0    1.40    2.60
 -11  -8   0   -3.30    1.80
 -11  -8   0    2.60    2.90
  11   8   0   -2.20    2.40
  11   8   0   -1.00    2.20
 -11   8   0    3.30    2.40
 -12  -8   0   -0.30    2.00
 -12  -8   0    2.90    3.50
  12  -8   0    2.40    2.20
  12  -8   0    3.00    3.00
  12   8   0    2.20    2.80
  12   8   0    1.40    3.80
  13  -8   0    7.90    3.30
  13  -8   0    8.20    2.60
 -13  -8   0    7.60    3.90
  13  -8   0    2.00    3.40
  13   8   0    6.80    3.00
  13   8   0    8.80    3.30
 -14  -8   0   24.90    5.10
  14  -8   0   21.50    3.40
  14  -8   0   37.70    4.30
  14  -8   0   20.50    4.00
  14   8   0   22.50    4.00
  14   8   0   25.80    4.10
   0  -9   0   -0.30    1.40
   0  -9   0    1.00    1.10
   0  -9   0    0.10    1.00
   0   9   0    0.20    1.40
   0   9   0   -0.20    1.00
   0   9   0    0.70    1.10
  -1  -9   0    6.90    1.30
  -1  -9   0    6.60    1.60
   1  -9   0    7.80    1.10
   1  -9   0    8.50    1.30
   1  -9   0    9.10    1.80
  -1   9   0    5.30    1.70
   1   9   0    8.40    1.30
   1   9   0    6.30    1.30
  -1   9   0    7.10    1.20
   1   9   0    5.00    1.70
  -1   9   0    7.00    1.10
  -2  -9   0   41.70    3.00
  -2  -9   0   45.20    3.50
   2  -9   0   44.90    3.60
   2  -9   0   46.40    2.70
  -2  -9   0   43.70    3.10
   2  -9   0   42.50    3.00
  -2   9   0   45.80    3.60
   2   9   0   41.00    2.90
   2   9   0   40.60    3.40
  -2   9   0   40.30    2.90
   2   9   0   47.20    3.00
  -3  -9   0    4.60    1.40
  -3  -9   0    2.80    1.40
  -3  -9   0    2.20    1.50
   3  -9   0    2.80    1.30
   3  -9   0    6.40    1.80
   3  -9   0    3.10    1.00
   3  -9   0    1.90    1.00
   3   9   0    2.50    1.20
  -3   9   0    1.70    1.20
   3   9   0    3.20    1.60
   3   9   0    4.30    1.50
  -3   9   0    6.60    1.80
   4  -9   0  262.47   12.90
   4  -9   0  265.47   12.90
  -4  -9   0  298.87   13.60
   4  -9   0  263.47   13.50
   4  -9   0  243.58   13.10
  -4  -9   0  269.57   13.40
  -4  -9   0  261.07   13.30
  -4   9   0  263.07   13.20
  -4   9   0  266.17   13.50
   4   9   0  260.87   13.10
   4   9   0  273.27   13.50
   5  -9   0    0.10    1.20
   5  -9   0   -0.10    1.00
   5  -9   0    2.60    1.80
  -5  -9   0   -1.70    1.50
  -5  -9   0   -1.20    1.40
  -5   9   0    2.60    1.30
   5   9   0   -1.00    1.60
  -5   9   0   -0.20    1.60
   5   9   0    1.10    1.20
  -6  -9   0   61.89    4.50
   6  -9   0   63.89    4.00
   6  -9   0   59.79    4.70
  -6  -9   0   66.69    4.30
   6  -9   0   57.29    3.70
  -6   9   0   72.09    4.90
  -6   9   0   67.79    4.30
   6   9   0   75.19    4.70
   6   9   0   64.49    4.10
   7  -9   0    6.00    2.20
  -7  -9   0    4.50    1.80
   7  -9   0    3.20    1.70
  -7  -9   0    4.00    2.00
   7   9   0    7.80    1.70
  -7   9   0    6.10    2.20
   7   9   0    6.20    2.10
  -7   9   0    6.20    1.80
   8  -9   0    5.90    2.00
  -8  -9   0   -2.70    1.90
   8  -9   0    2.70    1.40
   8  -9   0    5.50    2.20
  -8  -9   0    0.60    1.60
  -8   9   0    1.60    1.80
   8   9   0    2.50    1.70
   8   9   0    3.80    2.10
  -9  -9   0    0.10    1.60
  -9  -9   0    2.30    2.30
   9  -9   0    1.00    1.50
   9  -9   0   -2.00    2.40
   9   9   0   -0.40    2.20
  -9   9   0    2.90    1.90
   9   9   0    3.90    1.90
 -10  -9   0    7.10    2.10
  10  -9   0    8.30    1.90
 -10  -9   0    7.60    2.80
  10  -9   0   10.90    2.80
  10   9   0    9.50    2.70
 -10   9   0    7.30    2.40
  10   9   0    6.70    2.40
 -11  -9   0    0.50    2.00
 -11  -9   0    4.80    3.20
  11  -9   0    4.60    3.10
  11  -9   0   -0.90    3.00
  11  -9   0    0.60    1.80
  11   9   0    1.30    2.30
  11   9   0    4.10    2.90
 -11   9   0    2.10    2.60
  12  -9   0   21.20    3.60
  12  -9   0   13.00    2.60
  12  -9   0   19.00    3.90
 -12  -9   0   25.70    4.20
  12   9   0   20.20    3.70
  12   9   0   17.50    3.40
 -13  -9   0    2.50    4.40
  13  -9   0   -1.90    2.50
  13  -9   0    1.00    3.70
  13  -9   0    6.30    3.30
  13   9   0    6.70    3.80
  13   9   0    3.50    3.20
   0 -10   0  107.49    6.10
   0 -10   0  111.79    6.60
   0  10   0  113.59    6.00
   0  10   0  115.29    5.90
   0  10   0  114.49    6.70
   1 -10   0   52.99    3.80
   1 -10   0   57.49    3.40
   1 -10   0   55.49    4.30
  -1 -10   0   57.69    3.60
  -1 -10   0   58.09    4.30
  -1 -10   0   57.09    3.80
   1  10   0   56.29    4.20
   1  10   0   58.49    3.60
   1  10   0   56.79    3.60
  -1  10   0   57.29    3.50
  -1  10   0   56.49    3.60
  -1  10   0   54.29    4.20
  -2 -10   0   11.10    1.60
  -2 -10   0   14.20    1.80
   2 -10   0    9.60    2.20
   2 -10   0    9.10    1.80
   2 -10   0   13.80    1.40
  -2 -10   0   13.80    2.10
  -2  10   0   11.60    2.20
   2  10   0   11.20    2.20
   2  10   0   12.50    1.60
   2  10   0   12.90    1.70
  -2  10   0   12.30    1.60
   3 -10   0    0.20    1.20
   3 -10   0    1.20    1.90
   3 -10   0   -0.90    1.60
   3 -10   0    0.00    1.00
  -3 -10   0    1.40    1.40
  -3 -10   0   -0.30    1.60
   3  10   0    1.70    1.30
   3  10   0    0.30    1.90
  -3  10   0    0.80    1.80
  -3  10   0   -0.60    1.20
   4 -10   0   15.70    1.40
  -4 -10   0   14.80    2.20
   4 -10   0   12.00    1.50
  -4 -10   0   18.00    2.10
   4 -10   0   12.50    2.30
  -4  10   0   10.80    1.70
   4  10   0    9.70    2.20
  -4  10   0    9.90    2.30
   4  10   0   11.70    1.70
  -5 -10   0   13.10    2.20
  -5 -10   0   15.80    2.10
   5 -10   0   13.20    1.70
   5 -10   0   10.70    2.40
   5 -10   0   15.10    1.40
  -5  10   0    9.30    2.20
   5  10   0   11.00    2.30
   5  10   0   12.20    1.90
  -5  10   0   12.60    1.80
   6 -10   0   30.20    2.40
   6 -10   0   29.20    2.40
   6 -10   0   32.00    3.40
  -6 -10   0   29.60    2.90
  -6 -10   0   30.90    2.80
  -6  10   0   33.90    3.10
   6  10   0   31.20    3.10
   6  10   0   30.50    3.00
  -6  10   0   26.60    3.10
  -7 -10   0    2.10    1.80
  -7 -10   0    4.90    2.20
   7 -10   0    5.50    2.50
  -7  10   0    2.20    2.30
  -7  10   0    5.80    1.80
   7  10   0    5.70    1.80
   7  10   0    9.90    2.50
  -8 -10   0    1.10    2.40
  -8 -10   0   -1.20    1.80
   8 -10   0    2.00    1.50
   8 -10   0    4.50    2.70
   8  10   0    3.60    2.50
   8  10   0    2.80    1.80
  -8  10   0    2.90    2.00
   9 -10   0    3.50    1.70
  -9 -10   0    4.50    2.10
   9 -10   0    2.90    2.80
  -9 -10   0    6.90    2.80
   9  10   0    2.90    2.10
   9  10   0    6.40    2.80
  -9  10   0   10.10    2.30
  10 -10   0    4.00    1.90
 -10 -10   0    9.60    3.30
 -10 -10   0   10.90    2.30
  10 -10   0    4.40    3.30
  10  10   0   10.00    2.50
 -10  10   0   10.80    2.60
  10  10   0    7.50    3.10
  11 -10   0    3.40    2.10
  11 -10   0    0.60    3.30
 -11 -10   0    1.00    2.20
  11 -10   0    7.60    3.10
 -11 -10   0   -4.70    3.30
 -11  10   0    5.50    2.90
  11  10   0   -1.20    3.20
 -12 -10   0   -1.40    3.80
  12 -10   0    3.40    3.60
  12  10   0    6.20    2.90
  12  10   0    0.30    3.50
   0 -11   0    3.10    1.40
   0 -11   0    6.60    2.20
   0  11   0    3.10    1.40
   0  11   0   -0.50    1.40
   0  11   0    5.30    2.10
   1 -11   0  402.86   20.00
  -1 -11   0  397.36   20.00
  -1 -11   0  396.16   19.40
   1  11   0  416.06   20.00
  -1  11   0  403.16   19.50
  -1  11   0  407.26   20.10
   1  11   0  397.46   19.50
  -1  11   0  395.46   19.30
   1  11   0  384.46   19.40
   2 -11   0    0.00    1.20
   2 -11   0    1.50    2.00
  -2 -11   0    1.00    1.40
  -2 -11   0   -2.40    1.70
  -2  11   0   -0.70    2.00
   2  11   0   -0.20    1.50
  -2  11   0    2.10    1.40
   2  11   0    1.20    1.50
   2  11   0   -0.30    1.90
  -3 -11   0   61.39    4.80
   3 -11   0   63.09    3.80
   3 -11   0   62.69    5.10
  -3 -11   0   57.19    4.30
   3 -11   0   64.69    3.70
   3  11   0   61.29    4.00
  -3  11   0   65.89    5.00
  -3  11   0   67.69    4.20
   3  11   0   66.79    4.90
  -4 -11   0    0.10    1.60
  -4 -11   0    2.20    1.80
   4 -11   0    1.70    2.20
   4 -11   0    2.90    1.40
   4 -11   0    1.50    1.10
  -4  11   0   -2.80    2.00
   4  11   0    2.10    2.20
   4  11   0    1.20    1.40
  -4  11   0    1.20    1.50
  -5 -11   0    0.70    1.90
   5 -11   0    0.80    2.30
   5 -11   0    0.00    1.10
  -5 -11   0    1.10    1.90
  -5  11   0    3.10    2.40
   5  11   0    1.60    2.30
   5  11   0   -0.60    1.70
  -5  11   0   -1.40    1.60
   6 -11   0    6.20    1.30
  -6 -11   0    6.80    2.20
  -6 -11   0    3.50    2.10
   6 -11   0    6.10    2.70
  -6  11   0    7.90    2.60
  -6  11   0    7.20    1.90
   6  11   0    6.10    2.50
   6  11   0    5.00    1.80
   7 -11   0    2.90    1.40
  -7 -11   0    6.30    2.40
   7 -11   0    1.00    2.80
  -7 -11   0    1.20    2.00
   7  11   0   -1.90    1.80
  -7  11   0    2.80    1.90
   7  11   0    1.10    2.50
  -7  11   0   -1.10    2.70
  -8 -11   0    3.20    2.50
  -8 -11   0   -0.50    2.20
   8 -11   0   -1.50    2.50
   8 -11   0   -0.80    2.80
   8  11   0    4.00    1.90
   8  11   0    1.60    2.70
  -8  11   0    0.80    2.10
  -9 -11   0   92.29    6.80
  -9 -11   0   80.79    6.00
   9 -11   0   85.99    7.00
   9  11   0  100.19    6.90
  -9  11   0   91.59    6.40
   9  11   0   89.89    6.10
 -10 -11   0   -0.20    3.20
 -10 -11   0    0.90    2.40
  10 -11   0    3.40    3.60
 -10  11   0    0.60    2.60
  10  11   0   -2.80    2.40
  10  11   0   -2.50    3.40
  11 -11   0   69.99    6.50
 -11 -11   0   45.80    4.80
  11 -11   0   58.49    5.40
 -11 -11   0   51.49    5.40
  11  11   0   60.19    5.80
 -11  11   0   41.60    4.60
  11  11   0   41.20    4.20
   0 -12   0   26.40    2.70
   0 -12   0   30.10    3.30
   0  12   0   22.20    3.10
   0  12   0   28.60    2.50
  -1 -12   0   17.90    2.10
   1 -12   0   14.70    2.90
   1 -12   0   18.30    1.90
  -1 -12   0   16.80    2.70
   1  12   0   16.20    2.00
  -1  12   0   16.90    2.00
  -1  12   0   17.00    3.00
   1  12   0   19.50    3.10
   2 -12   0   84.69    6.20
  -2 -12   0   84.89    5.20
  -2 -12   0   91.29    6.10
   2 -12   0   82.49    4.80
   2  12   0   87.09    6.20
  -2  12   0   91.69    6.20
  -2  12   0   91.49    5.20
   2  12   0   84.59    5.20
  -3 -12   0    8.40    2.40
   3 -12   0    5.00    2.50
  -3 -12   0    3.30    1.90
   3 -12   0    4.90    1.30
  -3  12   0    5.50    1.60
   3  12   0    7.50    1.80
   3  12   0    7.30    2.50
  -3  12   0    5.90    2.60
  -4 -12   0   15.90    2.40
  -4 -12   0   10.70    2.60
   4 -12   0   13.20    1.50
   4 -12   0   13.50    2.80
   4  12   0   17.80    3.00
   4  12   0   15.50    2.10
  -4  12   0   16.90    3.20
  -4  12   0   14.50    2.10
   5 -12   0    7.10    1.30
  -5 -12   0    4.60    2.20
   5 -12   0    4.50    2.90
  -5 -12   0    3.60    2.20
   5  12   0    9.20    3.00
  -5  12   0    5.30    3.30
  -5  12   0    5.80    2.00
   5  12   0    8.70    1.90
  -6 -12   0   21.80    3.00
  -6 -12   0   21.10    2.90
   6 -12   0   15.20    4.80
  -6  12   0   22.90    3.60
   6  12   0   19.00    3.30
   6  12   0   21.00    2.50
  -6  12   0   19.90    2.50
  -7 -12   0   23.30    3.00
   7 -12   0   30.20    3.90
  -7 -12   0   29.40    3.50
  -7  12   0   24.80    3.90
   7  12   0   23.30    2.80
  -7  12   0   25.30    3.00
   7  12   0   23.40    3.60
  -8 -12   0    2.00    2.50
  -8 -12   0    8.70    3.10
   8 -12   0    2.80    3.50
   8  12   0    4.60    2.60
  -8  12   0    5.50    2.50
   8  12   0   11.30    3.30
  -9 -12   0   -2.30    2.60
   9 -12   0   -0.40    3.50
  -9 -12   0   -3.90    3.20
  -9  12   0   -3.10    2.60
   9  12   0   -0.70    5.70
   9  12   0    2.00    2.50
 -10 -12   0   -5.50    2.70
  10 -12   0   -3.80    3.80
 -10 -12   0   -3.90    3.50
  10  12   0    6.20    3.80
  10  12   0   -1.30    2.80
   0 -13   0   -0.50    3.40
   0 -13   0   -2.00    1.60
   0  13   0    1.40    1.80
   0  13   0   -0.60    2.60
   1 -13   0    2.60    1.60
  -1 -13   0    3.70    1.80
  -1 -13   0    2.50    2.70
   1  13   0    0.90    1.70
  -1  13   0   -4.40    3.00
   1  13   0    5.60    2.80
  -1  13   0    0.20    1.70
  -2 -13   0   54.79    5.00
   2 -13   0   48.10    4.00
  -2 -13   0   50.49    4.10
   2 -13   0   50.59    5.40
  -2  13   0   44.80    6.00
   2  13   0   47.50    4.00
   2  13   0   49.60    5.40
  -2  13   0   51.89    4.00
  -3 -13   0    0.10    2.00
   3 -13   0   -0.30    2.80
  -3 -13   0    6.40    2.60
  -3  13   0    2.90    1.90
   3  13   0    2.40    1.90
   3  13   0    1.50    2.90
  -3  13   0    0.70    2.70
  -4 -13   0    7.50    2.50
  -4 -13   0   10.50    2.50
   4 -13   0    7.90    3.10
   4  13   0    4.80    2.10
  -4  13   0   12.60    3.30
  -4  13   0    9.00    2.20
   4  13   0    6.60    3.00
  -5 -13   0    9.80    2.60
  -5 -13   0    3.70    2.80
   5 -13   0    3.30    3.20
  -5  13   0    9.10    3.00
   5  13   0    8.30    3.50
  -5  13   0    9.90    2.20
   5  13   0   10.80    2.20
   6 -13   0   46.70    5.00
  -6 -13   0   53.69    4.40
  -6 -13   0   43.70    5.30
  -6  13   0   48.30    4.60
  -6  13   0   49.70    5.00
   6  13   0   49.10    4.60
   7 -13   0   -6.00    3.40
  -7 -13   0    3.20    3.00
  -7  13   0   -2.30    3.50
   7  13   0   -2.00    2.30
  -7  13   0    7.70    2.60
   7  13   0   -4.80    3.10
  -8 -13   0    0.30    3.70
   8 -13   0   -8.80    3.70
  -8 -13   0    8.10    4.80
   8  13   0   -1.80    2.50
  -8  13   0    2.60    2.90
   8  13   0   -5.10    3.60
  -9 -13   0    2.80    3.60
  -9 -13   0   -7.00    3.00
   9 -13   0   -1.70    3.90
   9  13   0    0.60    3.10
  -9  13   0    0.50    3.00
   9  13   0    0.30    3.70
   0 -14   0    5.10    3.20
   0  14   0    3.50    3.20
   0  14   0    4.50    2.00
  -1 -14   0   43.80    4.40
  -1 -14   0   37.50    3.70
   1 -14   0   34.60    4.40
  -1  14   0   36.50    3.80
   1  14   0   34.00    3.10
   1  14   0   35.00    4.30
  -1  14   0   39.70    4.60
   2 -14   0   22.50    3.70
  -2 -14   0   22.70    2.70
  -2 -14   0   27.30    3.70
   2  14   0   19.70    2.50
  -2  14   0   27.90    2.70
   2  14   0   16.70    3.80
  -2  14   0   14.10    3.60
   3 -14   0   15.60    3.50
  -3 -14   0   15.10    3.40
  -3 -14   0   18.00    2.70
   3  14   0   15.60    2.50
  -3  14   0    9.70    3.60
  -3  14   0   15.20    2.50
   3  14   0   19.00    3.80
  -4 -14   0   26.00    3.60
   4 -14   0   29.90    4.30
  -4 -14   0   23.80    3.20
  -4  14   0   25.10    4.00
  -4  14   0   23.90    2.90
   4  14   0   23.20    2.80
   4  14   0   22.40    4.10
   5 -14   0    0.80    3.40
  -5 -14   0   -2.90    2.80
  -5 -14   0    1.20    2.70
   5  14   0    1.40    3.50
  -5  14   0    5.60    2.40
  -5  14   0   -3.60    3.40
   5  14   0   -1.40    2.30
  -6 -14   0   55.49    6.20
  -6 -14   0   66.69    6.10
   6 -14   0   64.49    6.10
  -6  14   0   77.69    7.30
  -6  14   0   73.29    5.70
   6  14   0   74.59    5.70
   6  14   0   72.79    7.10
   7 -14   0    9.50    4.20
  -7 -14   0   13.30    3.60
   7  14   0   11.40    3.00
  -7  14   0   18.50    4.60
  -7  14   0   17.00    3.10
   7  14   0   15.20    4.20
   0 -15   0    0.20    3.40
   0  15   0   -0.30    3.60
   0  15   0    1.60    2.70
   1 -15   0    7.80    3.50
  -1 -15   0    6.40    3.40
   1  15   0   -1.50    2.40
  -1  15   0    3.10    3.40
  -1  15   0    9.60    3.80
   1  15   0    6.40    3.80
   2 -15   0   -1.40    3.40
  -2 -15   0   -1.90    3.30
  -2  15   0   -4.40    3.60
   2  15   0    4.40    3.70
   2  15   0   -1.90    2.40
  -3 -15   0   20.20    3.90
   3 -15   0   21.30    4.50
  -3  15   0   27.50    4.50
   3  15   0   29.50    4.60
   4 -15   0   -5.90    3.50
  -4 -15   0    1.10    3.40
   4  15   0   -7.70    3.70
   4  15   0    2.90    3.80
  -4  15   0    3.70    4.10
  16   0  -1    1.40    3.00
 -16   0   1   -7.30    3.90
  16   0  -1   -2.60    3.50
 -15   0   1    3.10    3.60
  15   0  -1    0.00    3.00
  15   0  -1   -4.50    2.50
  14   0  -1    1.50    2.20
 -14   0   1   -0.10    2.90
  13   0  -1   -1.20    1.90
 -13   0   1   -1.00    2.50
  13   0  -1   -2.50    2.10
 -12   0   1   -2.50    2.00
  12   0  -1    2.20    1.70
  12   0  -1    6.60    2.00
  12   0  -1    0.40    1.30
  11   0  -1   -1.50    1.50
  11   0  -1   -1.00    1.10
  11   0  -1    2.60    1.50
 -11   0   1   -0.90    1.90
  10   0  -1    1.30    1.00
  10   0  -1    1.50    1.30
  10   0  -1    2.60    1.40
 -10   0   1    3.30    1.70
 -10   0   1    0.70    1.00
   9   0  -1    1.00    1.10
  -9   0   1    0.00    1.40
   9   0  -1    2.10    0.80
  -9   0   1    0.00    0.90
   9   0  -1    0.70    1.10
  -8   0   1    0.80    1.20
  -8   0   1    0.10    0.70
   8   0  -1    1.40    1.60
   8   0  -1   -0.30    1.00
   8   0  -1    1.30    1.00
   8   0  -1    1.20    0.70
   7   0  -1    0.30    1.20
   7   0  -1    0.70    0.60
  -7   0   1   -1.10    0.80
   7   0  -1    0.00    1.10
   7   0  -1    0.90    0.90
  -7   0   1    1.40    1.10
  -7   0   1   -0.40    0.60
   7   0  -1    0.70    0.80
  -6   0   1   -1.00    0.50
   6   0  -1    1.80    1.00
  -6   0   1    0.90    0.70
   6   0  -1   -0.30    1.10
   6   0  -1    1.10    0.80
  -5   0   1   -0.80    0.50
   5   0  -1    0.20    0.90
   5   0  -1   -0.50    0.40
  -5   0   1    0.10    0.60
   5   0  -1    0.50    0.80
  -5   0   1    0.60    0.80
   5   0  -1   -0.60    0.50
  -4   0   1    0.20    0.60
   4   0  -1    1.50    0.60
   4   0  -1   -0.10    0.50
   4   0  -1    0.40    0.40
   4   0  -1    0.40    0.40
  -4   0   1   -0.40    0.30
  -3   0   1    0.30    0.30
   3   0  -1    0.20    0.40
  -3   0   1   -0.20    0.30
   3   0  -1   -0.20    0.30
   3   0  -1    0.50    0.40
   3   0  -1    0.30    0.50
  -3   0   1   -0.70    0.40
  -2   0   1    0.00    0.20
   2   0  -1    0.00    0.20
   2   0  -1    0.00    0.30
   2   0  -1    0.30    0.30
  -2   0   1   -0.10    0.20
  -2   0   1    0.00    0.30
  -2   0  -1   -0.60    0.20
   2   0   1    0.00    0.30
   2   0   1    0.50    0.40
  -2   0  -1    0.30    0.30
  -2   0  -1   -0.70    0.30
   2   0   1   -0.50    0.40
   2   0   1   -0.10    0.20
  -2   0  -1    0.10    0.30
  -3   0  -1    0.10    0.50
   3   0   1   -0.30    0.60
   3   0   1    0.20    0.40
  -3   0  -1    0.00    0.20
  -3   0  -1    0.00    0.40
  -3   0  -1   -0.10    0.50
   3   0   1    0.10    0.20
   3   0   1   -0.60    0.40
   4   0   1   -0.10    0.60
  -4   0  -1    0.50    0.50
   4   0   1   -0.50    0.40
   4   0   1   -0.30    0.60
  -4   0  -1   -0.40    0.30
   4   0   1    0.10    0.30
  -4   0  -1    0.80    0.60
   5   0   1    0.00    0.70
   5   0   1    0.60    0.40
  -5   0  -1   -0.50    0.60
  -5   0  -1    0.10    0.70
  -5   0  -1   -0.50    0.40
   5   0   1    0.40    0.80
   5   0   1    0.10    0.70
  -6   0  -1   -0.50    0.50
   6   0   1   -1.50    1.00
   6   0   1    0.10    0.50
   6   0   1    0.60    0.80
   6   0   1   -1.00    1.10
  -6   0  -1   -0.40    0.80
   7   0   1   -0.80    1.10
  -7   0  -1   -0.10    1.00
   7   0   1   -0.40    1.20
  -7   0  -1   -0.10    0.60
   7   0   1    0.60    0.50
  -7   0  -1   -1.10    0.90
  -8   0  -1    2.10    1.20
   8   0   1    0.40    0.60
  -8   0  -1    1.00    1.10
   8   0   1   -0.50    1.40
   8   0   1   -0.40    0.90
   9   0   1   -0.20    1.10
   9   0   1   -0.70    1.20
  -9   0  -1   -1.20    1.30
  10   0   1   -0.20    1.50
 -10   0  -1    3.00    1.60
  10   0   1    3.40    1.40
  11   0   1   -1.10    1.60
 -11   0  -1   -2.70    1.90
  11   0   1    1.90    1.60
  11   0   1    0.50    0.90
  12   0   1    0.00    1.80
  12   0   1    3.50    1.90
 -12   0  -1    2.10    2.20
 -13   0  -1   -2.70    2.40
  13   0   1    1.50    1.90
  13   0   1   -4.80    2.10
 -14   0  -1    0.40    3.00
  14   0   1   -2.70    4.40
  14   0   1    7.40    2.40
  15   0   1    4.40    3.40
  15   0   1   -4.10    2.50
 -15   0  -1    3.30    3.50
  16   0   1   -0.60    3.90
 -16   0  -1    7.00    4.20
  16   0   1    2.70    3.30
  16  -1  -1    5.00    3.80
  16  -1  -1    7.70    3.10
 -16  -1   1   11.70    4.50
  16   1  -1    6.10    3.10
 -16   1   1    6.40    4.30
  16   1  -1    7.70    3.70
  15  -1  -1    2.30    2.70
  15  -1  -1    5.50    3.50
 -15  -1   1    3.60    3.70
  15   1  -1    0.10    3.10
 -15   1   1    0.00    3.50
  15   1  -1    5.60    2.80
 -14  -1   1   -2.50    3.00
  14  -1  -1   -2.80    1.70
  14  -1  -1    2.80    2.20
 -14   1   1    1.70    3.00
  14   1  -1   -0.80    2.30
  13  -1  -1    0.40    1.90
 -13  -1   1    1.80    2.60
  13  -1  -1    1.40    1.60
  13  -1  -1    3.20    2.40
  13   1  -1   -2.40    1.80
 -13   1   1    3.60    2.60
  13   1  -1   -0.60    2.30
 -12  -1   1   59.39    5.00
  12  -1  -1   61.59    3.70
  12  -1  -1   60.09    4.30
  12  -1  -1   61.69    4.50
  12   1  -1   60.69    4.20
  12   1  -1   56.09    3.60
  12   1  -1   66.99    4.80
 -12   1   1   60.49    4.90
  11  -1  -1   14.70    1.60
 -11  -1   1   13.30    2.40
 -11  -1   1   15.00    1.50
  11  -1  -1   13.80    2.10
  11  -1  -1   14.70    1.90
  11   1  -1   14.00    1.50
 -11   1   1   13.70    2.20
  11   1  -1   13.30    1.90
  11   1  -1   13.20    2.10
  10  -1  -1  206.78   10.60
  10  -1  -1  214.38   10.40
  10  -1  -1  208.98   10.80
 -10  -1   1  211.68   11.00
 -10  -1   1  215.38   10.30
 -10  -1   1  202.78   10.60
  10   1  -1  222.88   10.30
 -10   1   1  212.98   10.90
  10   1  -1  202.88   10.80
  10   1  -1  207.78   10.60
   9  -1  -1   20.60    1.80
   9  -1  -1   20.00    2.00
  -9  -1   1   18.30    1.90
  -9  -1   1   20.10    1.60
  -9  -1   1   17.90    2.10
   9   1  -1   22.00    1.80
   9   1  -1   17.40    1.90
  -9   1   1   16.60    2.00
   9   1  -1   19.70    1.70
   8  -1  -1  130.49    6.20
   8  -1  -1  125.69    6.40
  -8  -1   1  125.59    6.40
  -8  -1   1  127.79    6.20
  -8  -1   1  125.59    6.70
   8  -1  -1  116.09    6.70
   8   1  -1  116.19    6.50
  -8   1   1  121.49    6.30
   8   1  -1  127.89    6.20
  -8   1   1  122.59    6.60
  -7  -1   1   46.90    2.50
   7  -1  -1   43.70    2.70
  -7  -1   1   49.20    3.10
   7  -1  -1   44.00    3.00
   7  -1  -1   44.10    3.10
   7  -1  -1   47.70    2.50
  -7  -1   1   44.60    2.70
  -7   1   1   43.00    3.00
   7   1  -1   47.90    3.20
   7   1  -1   48.90    3.00
   7   1  -1   45.70    2.50
   7   1  -1   41.80    2.80
   7   1  -1   42.80    2.70
  -7   1   1   44.90    2.60
   6  -1  -1  184.08    9.10
  -6  -1   1  198.18    9.10
   6  -1  -1  191.78    9.00
   6  -1  -1  189.08    9.20
  -6  -1   1  194.08    9.00
  -6  -1   1  182.68    9.30
   6  -1  -1  191.78    9.30
  -6   1   1  165.18    9.40
   6   1  -1  185.78    9.10
   6   1  -1  191.88    9.30
   6   1  -1  173.28    9.00
   6   1  -1  178.78    9.20
  -6   1   1  182.88    9.00
  -5  -1   1   22.10    1.50
  -5  -1   1   20.50    1.80
  -5  -1   1   20.50    1.40
   5  -1  -1   21.10    1.70
   5  -1  -1   19.90    1.50
   5  -1  -1   22.10    1.50
   5  -1  -1   20.40    1.70
   5   1  -1   21.00    1.60
   5   1  -1   23.60    1.30
   5   1  -1   22.10    1.90
  -5   1   1   19.80    1.70
   5   1  -1   23.30    1.50
  -5   1   1   20.10    1.50
   4  -1  -1    1.80    0.60
   4  -1  -1    1.70    0.60
   4  -1  -1    1.70    0.50
  -4  -1   1    1.70    0.70
  -4  -1   1    2.90    0.40
   4  -1  -1    2.10    0.50
  -4   1   1    1.60    0.60
  -4   1   1    1.90    0.70
  -4   1   1    1.00    0.50
   4   1  -1    2.70    0.50
   4   1  -1    2.00    0.70
   4   1  -1    1.80    0.40
   4   1  -1    2.60    0.60
   3  -1  -1   32.30    1.70
   3  -1  -1   31.90    1.70
  -3  -1   1   32.40    1.70
  -3  -1   1   33.00    1.70
   3  -1  -1   31.50    1.80
  -3  -1   1   30.20    1.80
   3   1  -1   32.40    1.80
  -3   1   1   29.90    1.70
  -3   1   1   29.80    1.80
   3   1  -1   30.80    1.70
  -3   1   1   30.70    1.80
   3   1  -1   30.20    1.80
   3   1  -1   30.60    1.70
  -2  -1   1 1533.15   63.09
   2  -1  -1 1313.87   62.79
  -2  -1   1 1302.47   62.79
   2  -1  -1 1303.27   62.79
  -2  -1   1 1329.37   62.79
   2  -1  -1 1301.87   62.79
   2  -1  -1 1313.57   62.79
  -2  -1   1 1507.95   62.99
  -2   1   1 1297.07   62.79
  -2   1   1 1270.77   62.79
  -2   1   1 1258.47   62.79
  -2   1   1 1281.57   62.79
   2   1  -1 1272.07   62.79
   2   1  -1 1300.47   62.79
   2   1  -1 1284.67   62.79
   1  -1  -1   33.50    1.80
   1  -1  -1   36.10    1.80
   1  -1  -1   34.70    1.80
  -1  -1   1   35.30    1.80
  -1  -1   1   35.70    1.80
  -1  -1   1   37.30    1.80
   1   1  -1   35.90    1.80
   1   1  -1   35.50    1.80
   1   1  -1   35.50    1.80
   1   1  -1   36.00    1.80
  -1   1   1   35.10    1.80
  -1   1   1   35.60    1.80
   0  -1  -1    0.00    0.10
  -1  -1  -1 1796.52   89.59
  -1  -1  -1 1967.40   89.59
   1  -1   1 2011.10   89.79
  -1  -1  -1 1961.90   89.59
   1  -1   1 1871.31   89.39
   1  -1   1 1919.51   89.59
   1  -1   1 1783.62   89.49
   1   1   1 1990.70   89.69
   1   1   1 1777.12   89.39
   1   1   1 1941.41   89.69
   1   1   1 1913.81   89.79
  -1   1  -1 1820.92   89.59
  -1   1  -1 1758.42   89.39
   2  -1   1 6142.79  295.37
  -2  -1  -1 5932.51  295.57
  -2  -1  -1 6305.27  295.47
   2  -1   1 5938.91  295.27
   2  -1   1 6458.45  295.57
  -2  -1  -1 6247.87  295.17
  -2   1  -1 6273.57  295.57
   2   1   1 6310.07  295.17
   2   1   1 6237.58  295.57
   2   1   1 6221.38  295.57
   2   1   1 6487.05  295.67
  -2   1  -1 6192.48  295.37
   3  -1   1  521.25   24.10
  -3  -1  -1  502.25   24.00
   3  -1   1  518.35   24.10
   3  -1   1  517.25   24.10
  -3  -1  -1  496.95   24.20
   3  -1   1  501.35   24.10
  -3  -1  -1  453.35   24.10
  -3   1  -1  501.15   24.10
   3   1   1  493.55   24.10
   3   1   1  515.25   24.00
  -3   1  -1  504.35   24.10
   3   1   1  521.25   24.10
   3   1   1  529.95   24.20
  -4  -1  -1   57.79    3.00
   4  -1   1   55.49    2.90
   4  -1   1   58.19    3.10
   4  -1   1   53.99    3.00
  -4  -1  -1   58.59    2.80
   4  -1   1   57.89    3.00
  -4  -1  -1   54.79    3.10
  -4   1  -1   58.79    3.00
   4   1   1   56.49    3.10
   4   1   1   56.39    2.80
   4   1   1   57.19    3.00
  -4   1  -1   54.29    3.00
   4   1   1   57.89    3.00
   5  -1   1  445.06   21.40
   5  -1   1  448.06   21.20
  -5  -1  -1  441.26   21.40
   5  -1   1  439.46   21.30
  -5  -1  -1  443.16   21.10
  -5  -1  -1  455.95   21.30
   5  -1   1  446.26   21.40
   5   1   1  433.36   21.30
  -5   1  -1  435.96   21.40
   5   1   1  456.65   21.40
   5   1   1  449.26   21.10
  -5   1  -1  432.46   21.40
   5   1   1  453.55   21.40
  -6  -1  -1   17.30    1.20
  -6  -1  -1   18.00    1.90
  -6  -1  -1   18.50    1.60
   6  -1   1   19.30    1.70
   6  -1   1   17.90    1.90
   6  -1   1   19.40    1.90
   6  -1   1   16.70    1.30
  -6   1  -1   18.00    1.90
   6   1   1   16.90    1.60
   6   1   1   18.40    1.20
  -6   1  -1   17.70    1.70
   6   1   1   19.80    1.60
   6   1   1   16.10    1.70
   6   1   1   15.80    1.60
   7  -1   1  117.59    6.40
   7  -1   1  123.09    6.40
  -7  -1  -1  121.89    6.00
  -7  -1  -1  125.99    6.20
   7  -1   1  126.79    6.10
   7  -1   1  120.19    6.20
  -7  -1  -1  122.79    6.50
   7   1   1  121.09    6.50
   7   1   1  123.39    6.30
   7   1   1  123.29    6.00
   7   1   1  121.19    6.40
  -7   1  -1  119.29    6.40
   8  -1   1   45.80    3.30
   8  -1   1   46.50    2.80
  -8  -1  -1   42.90    3.10
  -8  -1  -1   43.40    3.00
   8  -1   1   47.70    2.50
  -8  -1  -1   44.60    2.40
   8   1   1   43.80    2.40
   8   1   1   44.20    2.80
   8   1   1   41.30    2.90
  -8   1  -1   42.40    3.10
  -9  -1  -1    9.70    1.70
  -9  -1  -1    7.70    1.50
   9  -1   1    8.20    1.40
   9  -1   1    8.00    1.00
  -9  -1  -1    7.50    0.90
   9   1   1    8.40    0.90
  -9   1  -1    6.20    1.60
   9   1   1    7.00    1.30
   9   1   1    5.50    1.30
  10  -1   1   89.09    4.60
  10  -1   1   87.39    5.00
  10  -1   1   92.49    4.70
 -10  -1  -1   86.59    5.50
 -10   1  -1   99.39    5.50
  10   1   1   85.49    5.30
  10   1   1   81.89    5.00
  11  -1   1   29.70    2.20
  11  -1   1   33.30    2.40
  11  -1   1   30.00    2.90
 -11  -1  -1   35.20    3.60
  11   1   1   32.80    3.00
  11   1   1   25.10    2.60
 -11   1  -1   31.60    3.10
  12  -1   1    0.10    1.20
 -12  -1  -1   -1.00    2.30
  12  -1   1    0.30    1.80
  12  -1   1   -2.10    1.10
  12  -1   1   -1.20    2.00
  12   1   1    0.60    1.70
  12   1   1    0.00    2.00
 -12   1  -1   -2.20    2.00
  13  -1   1    9.10    2.20
 -13  -1  -1   14.60    3.00
  13  -1   1    7.10    2.40
 -13   1  -1    8.10    2.60
  13   1   1   10.20    2.60
  13   1   1    7.30    2.10
  14  -1   1   12.40    4.10
  14  -1   1    6.80    2.60
 -14  -1  -1    9.80    3.50
 -14   1  -1    6.90    3.00
  14   1   1    4.80    2.40
  14   1   1    7.20    3.30
  15  -1   1   -0.20    2.70
 -15  -1  -1   -3.00    3.30
  15  -1   1   -0.50    3.20
 -15   1  -1    5.70    3.60
  15   1   1   -3.70    2.70
  15   1   1    1.40    3.10
  16  -1   1    6.50    3.40
  16  -1   1    9.50    4.30
 -16  -1  -1    6.50    4.30
 -16   1  -1    3.90    4.30
  16   1   1    0.50    3.30
  16   1   1   -4.80    3.50
 -16  -2   1   -1.10    4.30
  16  -2  -1    3.10    3.40
  16  -2  -1    0.20    3.90
 -16   2   1    2.00    4.20
  16   2  -1    7.30    3.20
  16   2  -1    2.80    3.60
 -15  -2   1   -6.30    3.70
  15  -2  -1   -2.00    3.20
  15  -2  -1    0.70    2.80
  15   2  -1    0.90    2.70
  15   2  -1    2.80    3.10
 -15   2   1    1.40    3.50
  14  -2  -1   12.00    2.70
 -14  -2   1   16.40    5.70
 -14   2   1    4.40    3.20
  14   2  -1   15.30    2.60
  14   2  -1    8.40    3.00
  13  -2  -1    1.70    1.80
 -13  -2   1    2.00    2.60
  13  -2  -1    2.10    2.30
  13  -2  -1   -1.70    3.30
 -13   2   1   -3.50    2.40
  13   2  -1    2.00    2.20
  13   2  -1    0.30    1.90
  12  -2  -1   42.40    4.10
 -12  -2   1   44.00    2.80
 -12  -2   1   43.40    4.60
  12  -2  -1   37.30    3.50
  12  -2  -1   41.50    3.20
 -12   2   1   43.40    4.30
  12   2  -1   40.50    3.50
  12   2  -1   37.10    2.80
  12   2  -1   42.20    3.80
 -11  -2   1   29.50    3.10
  11  -2  -1   24.90    2.50
 -11  -2   1   27.80    2.20
  11  -2  -1   30.20    2.80
  11   2  -1   24.60    2.70
 -11   2   1   26.80    2.90
  11   2  -1   25.50    2.70
  11   2  -1   26.00    2.30
 -10  -2   1    1.40    0.90
 -10  -2   1   -1.30    1.60
 -10  -2   1    0.30    1.50
  10  -2  -1   -0.60    1.20
  10  -2  -1    1.50    1.30
  10   2  -1    0.60    1.10
  10   2  -1    0.30    1.30
  10   2  -1   -0.50    1.30
 -10   2   1    0.40    1.50
  -9  -2   1   -0.50    1.40
   9  -2  -1    1.70    1.10
   9  -2  -1   -0.10    1.40
  -9  -2   1    1.30    0.80
  -9  -2   1   -1.10    1.20
   9  -2  -1    0.70    1.00
   9   2  -1    1.60    1.10
   9   2  -1    0.20    1.20
   9   2  -1    0.60    0.90
  -9   2   1    1.20    1.30
  -8  -2   1    0.00    0.70
   8  -2  -1    1.10    0.90
   8  -2  -1   -0.30    1.20
   8  -2  -1   -1.30    1.40
  -8  -2   1   -1.10    1.00
  -8  -2   1    0.40    1.20
   8  -2  -1   -0.30    0.80
   8   2  -1   -0.60    0.70
  -8   2   1    0.50    1.20
   8   2  -1   -0.40    1.00
   8   2  -1    0.20    0.90
   7  -2  -1   23.30    1.60
   7  -2  -1   16.70    1.70
   7  -2  -1   22.40    2.30
   7  -2  -1   19.00    1.80
   7  -2  -1   21.20    1.80
  -7  -2   1   18.30    1.90
  -7  -2   1   18.10    1.40
  -7  -2   1   20.20    1.80
   7   2  -1   18.10    1.70
   7   2  -1   18.60    1.90
   7   2  -1   20.90    2.00
  -7   2   1   16.10    1.70
   7   2  -1   15.70    1.60
   7   2  -1   22.60    1.50
   6  -2  -1    3.70    1.00
  -6  -2   1    5.20    0.70
  -6  -2   1    2.90    1.10
   6  -2  -1    3.40    0.80
  -6  -2   1    5.40    0.90
   6  -2  -1    3.50    1.10
   6  -2  -1    3.40    0.90
   6  -2  -1    3.10    0.90
  -6   2   1    3.40    0.90
   6   2  -1    3.90    0.70
  -6   2   1    4.20    1.10
   6   2  -1    3.30    0.90
   6   2  -1    3.40    0.80
   6   2  -1    3.40    1.20
  -5  -2   1    4.70    0.70
   5  -2  -1    3.90    0.80
   5  -2  -1    4.90    1.00
   5  -2  -1    3.30    0.90
   5  -2  -1    2.50    0.80
  -5  -2   1    3.00    1.00
  -5  -2   1    4.50    0.70
   5  -2  -1    2.70    0.90
  -5   2   1    4.50    0.90
   5   2  -1    2.80    1.00
   5   2  -1    3.40    0.90
   5   2  -1    3.60    0.80
  -5   2   1    1.90    0.80
   4  -2  -1 1460.55   68.79
  -4  -2   1 1447.06   68.89
  -4  -2   1 1480.25   68.79
   4  -2  -1 1479.05   68.79
   4  -2  -1 1476.05   68.79
  -4  -2   1 1419.86   68.69
  -4  -2   1 1440.06   68.69
   4  -2  -1 1491.35   68.79
  -4   2   1 1412.76   68.79
   4   2  -1 1473.75   68.69
  -4   2   1 1384.46   68.79
   4   2  -1 1495.45   68.89
   4   2  -1 1401.56   68.79
   4   2  -1 1414.46   68.69
  -3  -2   1   31.60    1.70
  -3  -2   1   30.40    1.70
   3  -2  -1   30.60    1.70
  -3  -2   1   29.90    1.80
  -3  -2   1   29.00    1.60
   3  -2  -1   30.50    1.80
   3  -2  -1   29.80    1.70
   3   2  -1   28.30    1.70
   3   2  -1   30.60    1.80
  -3   2   1   28.00    1.70
  -3   2   1   28.30    1.70
  -3   2   1   28.00    1.70
   3   2  -1   28.50    1.70
   3   2  -1   29.70    1.70
   2  -2  -1 1407.66   68.19
  -2  -2   1 1418.66   68.19
  -2  -2   1 1449.76   68.19
   2  -2  -1 1460.25   68.19
  -2  -2   1 1325.97   68.29
   2  -2  -1 1442.26   68.19
  -2  -2   1 1414.06   68.19
  -2   2   1 1404.96   68.19
  -2   2   1 1441.06   68.19
   2   2  -1 1421.76   68.19
   2   2  -1 1659.23   68.49
   2   2  -1 1420.86   68.19
   2   2  -1 1425.56   68.19
   1  -2  -1    1.10    0.40
  -1  -2   1    1.50    0.40
   1  -2  -1    1.70    0.30
   1  -2  -1    2.70    0.40
  -1  -2   1    2.10    0.40
   1  -2  -1    1.20    0.40
  -1  -2   1    1.20    0.30
  -1  -2   1    1.60    0.40
   1   2  -1    1.50    0.40
   1   2  -1    1.50    0.40
   1   2  -1    1.60    0.40
  -1   2   1    1.20    0.40
   1   2  -1    1.10    0.40
  -1   2   1    1.50    0.30
  -1   2   1    1.70    0.50
   0  -2  -1 4657.83  224.68
   0  -2   1 4516.45  224.58
   0  -2  -1 4838.32  224.28
   0  -2   1 4837.02  224.78
   0  -2   1 4777.62  224.28
   0  -2   1 4741.13  224.48
   0  -2  -1 4696.13  224.48
   0   2  -1 4834.62  224.78
   0   2   1 4738.13  224.48
   0   2   1 4730.03  224.28
   0   2   1 4610.24  224.58
   0   2  -1 4685.53  224.48
   0   2   1 4788.02  224.88
   0   2  -1 4781.42  224.78
   0   2  -1 4732.93  224.28
   1  -2   1    0.60    0.20
  -1  -2  -1    0.40    0.40
   1  -2   1    0.20    0.40
  -1  -2  -1    0.40    0.30
   1  -2   1   -0.30    0.40
  -1  -2  -1   -0.70    0.40
  -1  -2  -1   -0.40    0.40
   1  -2   1    0.20    0.40
  -1   2  -1    0.00    0.40
  -1   2  -1   -0.10    0.40
   1   2   1    0.10    0.30
   1   2   1   -0.40    0.40
   1   2   1   -0.20    0.40
  -1   2  -1    0.40    0.40
   1   2   1    1.00    0.40
  -2  -2  -1 4780.62  219.28
   2  -2   1 4705.83  218.88
   2  -2   1 4590.04  219.18
  -2  -2  -1 4583.44  219.28
   2  -2   1 4320.27  218.98
  -2  -2  -1 4927.91  219.18
   2  -2   1 4440.36  219.38
  -2  -2  -1 4650.33  219.08
   2   2   1 4328.07  219.58
  -2   2  -1 4746.33  219.48
  -2   2  -1 4704.43  219.28
   2   2   1 4752.22  219.08
   2   2   1 4497.05  219.18
   2   2   1 4558.94  219.08
  -2   2  -1 4640.04  218.88
   3  -2   1   14.10    1.20
   3  -2   1   12.40    1.00
  -3  -2  -1   11.30    1.10
   3  -2   1   13.70    1.00
  -3  -2  -1   14.40    1.10
   3  -2   1   11.90    1.20
  -3  -2  -1   13.70    0.90
  -3   2  -1   11.20    1.00
  -3   2  -1   12.90    1.10
   3   2   1   12.10    0.90
   3   2   1   12.20    1.00
   3   2   1   12.80    1.00
   3   2   1   12.10    1.20
   4  -2   1  126.79    6.20
  -4  -2  -1  118.29    6.30
  -4  -2  -1  127.59    6.10
   4  -2   1  125.29    6.20
   4  -2   1  133.69    6.30
   4  -2   1  122.09    6.20
  -4  -2  -1  128.09    6.20
   4  -2   1  125.29    6.30
   4   2   1  124.09    6.10
  -4   2  -1  121.89    6.20
   4   2   1  130.39    6.30
   4   2   1  130.99    6.30
   4   2   1  122.29    6.20
  -4   2  -1  123.39    6.30
   5  -2   1    1.90    0.70
   5  -2   1    3.20    0.80
   5  -2   1    1.10    0.90
   5  -2   1    1.70    0.90
  -5  -2  -1    0.90    0.90
   5  -2   1    0.40    0.70
  -5  -2  -1    2.80    0.80
   5  -2   1    1.00    0.90
  -5  -2  -1    1.50    0.50
  -5   2  -1    1.60    0.90
   5   2   1    1.50    0.50
   5   2   1    1.60    0.70
   5   2   1    0.30    0.80
   5   2   1    0.00    1.00
  -5   2  -1    0.30    0.90
  -6  -2  -1   12.30    1.00
   6  -2   1   14.10    1.40
   6  -2   1   12.40    1.40
  -6  -2  -1   14.10    1.60
   6  -2   1   12.50    1.30
   6  -2   1   12.60    1.30
  -6  -2  -1   13.70    1.50
   6  -2   1   10.90    1.40
  -6   2  -1   11.60    1.40
   6   2   1   14.30    1.30
  -6   2  -1   13.00    1.40
   6   2   1   12.40    1.40
   6   2   1   12.40    1.10
   6   2   1   13.50    1.40
   6   2   1   12.70    1.30
   7  -2   1    3.20    0.80
  -7  -2  -1    2.10    1.00
  -7  -2  -1    2.60    1.10
   7  -2   1    1.50    1.20
   7  -2   1    3.50    0.90
   7  -2   1    3.90    1.20
  -7  -2  -1    3.00    0.60
   7  -2   1    1.00    1.20
   7  -2   1    2.50    0.70
   7   2   1    1.70    1.20
   7   2   1    3.10    1.00
  -7   2  -1    2.50    1.10
  -7   2  -1    3.20    1.10
   7   2   1    2.50    1.20
   7   2   1    2.90    0.70
  -8  -2  -1   71.89    4.40
   8  -2   1   74.89    4.40
   8  -2   1   70.29    4.10
   8  -2   1   72.69    4.40
   8  -2   1   74.09    3.90
  -8  -2  -1   76.69    3.70
  -8  -2  -1   73.59    4.20
   8  -2   1   73.09    3.90
   8   2   1   71.69    4.20
  -8   2  -1   71.59    4.30
   8   2   1   73.69    3.70
   8   2   1   69.89    4.10
   9  -2   1   -1.40    0.90
  -9  -2  -1   -1.10    1.30
   9  -2   1    0.10    1.10
   9  -2   1    1.50    0.90
  -9  -2  -1   -0.80    0.60
  -9  -2  -1    0.30    1.40
   9   2   1   -1.00    1.10
   9   2   1   -1.50    1.10
  -9   2  -1    1.10    1.40
   9   2   1    0.60    0.70
  10  -2   1   31.20    2.20
 -10  -2  -1   28.80    2.90
  10  -2   1   22.90    2.60
  10  -2   1   26.00    2.20
 -10   2  -1   29.20    2.70
  10   2   1   27.30    2.30
  10   2   1   22.10    2.30
  11  -2   1   -0.40    1.20
  11  -2   1    5.80    1.40
  11  -2   1    3.40    1.60
 -11  -2  -1    4.80    2.30
  11   2   1    3.20    1.80
 -11   2  -1    5.80    2.00
  11   2   1    4.00    1.70
  12  -2   1   67.19    4.10
 -12  -2  -1   68.99    5.50
  12  -2   1   68.69    4.60
  12  -2   1   68.29    4.00
 -12   2  -1   74.99    5.20
  12   2   1   64.69    5.00
  12   2   1   68.99    4.60
  13  -2   1   -1.20    1.90
 -13  -2  -1    1.60    2.70
  13  -2   1    1.40    1.50
  13  -2   1    3.10    2.40
 -13   2  -1    2.50    2.60
  13   2   1   -1.80    2.20
  13   2   1   -0.90    2.10
  14  -2   1    5.00    3.00
 -14  -2  -1    5.30    4.70
  14  -2   1    4.00    2.40
 -14   2  -1    4.00    3.10
  14   2   1    5.40    2.40
  14   2   1    2.80    2.70
 -15  -2  -1   -1.10    3.80
  15  -2   1    3.30    2.90
  15  -2   1    1.20    3.40
 -15   2  -1   -2.00    3.70
  15   2   1   -0.90    3.20
  15   2   1   -1.00    2.80
  16  -2   1   14.10    4.30
 -16  -2  -1   12.70    4.90
  16   2   1   12.70    3.60
 -16   2  -1    6.80    4.50
  16   2   1   13.90    3.90
 -16  -3   1    1.40    4.60
  16  -3  -1   -3.50    4.10
  16   3  -1   -3.60    3.60
  16   3  -1    7.80    3.50
 -16   3   1    2.40    4.10
 -15  -3   1    1.30    4.00
  15  -3  -1    0.70    2.70
  15  -3  -1    8.70    3.60
 -15   3   1    0.00    3.70
  15   3  -1    6.30    2.90
  15   3  -1    2.40    3.20
  14  -3  -1   57.49    5.00
  14  -3  -1   61.99    5.50
 -14  -3   1   74.39    6.50
  14  -3  -1   64.59    4.70
  14   3  -1   57.29    5.60
  14   3  -1   70.79    5.10
 -14   3   1   73.29    6.10
  13  -3  -1    1.30    2.30
 -13  -3   1   -0.20    2.80
  13  -3  -1    1.20    1.90
  13  -3  -1    1.80    1.90
  13   3  -1   -3.10    2.10
 -13   3   1    0.60    2.50
  13   3  -1    4.90    2.10
 -12  -3   1    9.90    1.40
 -12  -3   1   13.10    2.70
  12  -3  -1    9.00    1.90
  12  -3  -1   10.90    2.00
  12  -3  -1    5.90    1.90
 -12   3   1   10.20    2.50
  12   3  -1    7.00    2.10
  12   3  -1   11.30    2.10
  12   3  -1    6.90    1.60
 -11  -3   1    4.20    1.20
 -11  -3   1    5.50    2.20
  11  -3  -1    2.90    1.50
  11  -3  -1    1.60    1.60
  11  -3  -1    2.00    1.60
  11   3  -1    2.00    1.60
 -11   3   1    0.90    1.90
  11   3  -1    4.60    1.90
  11   3  -1    3.70    1.30
 -10  -3   1   17.60    2.00
  10  -3  -1   19.60    2.10
  10  -3  -1   20.30    1.90
 -10  -3   1   23.30    2.60
 -10  -3   1   23.30    1.90
  10  -3  -1   21.00    2.10
  10   3  -1   26.20    2.50
  10   3  -1   22.10    1.80
  10   3  -1   23.90    2.30
 -10   3   1   22.80    2.50
  -9  -3   1    5.90    1.70
   9  -3  -1    8.30    1.40
   9  -3  -1    8.40    1.50
  -9  -3   1    8.20    1.50
  -9  -3   1    8.50    1.10
  -9   3   1    8.50    1.70
   9   3  -1    7.60    1.60
   9   3  -1   10.00    1.40
   9   3  -1    8.60    1.20
   8  -3  -1   67.69    3.90
   8  -3  -1   65.19    4.20
  -8  -3   1   70.29    3.60
  -8  -3   1   66.39    3.90
  -8  -3   1   70.09    4.30
   8  -3  -1   67.29    4.20
   8  -3  -1   65.49    3.90
   8   3  -1   69.09    3.70
   8   3  -1   71.59    4.10
   8   3  -1   69.09    3.90
  -8   3   1   65.79    4.10
   7  -3  -1    2.80    1.10
   7  -3  -1    4.00    1.40
  -7  -3   1    5.40    1.00
   7  -3  -1    3.60    1.20
  -7  -3   1    3.80    1.30
   7  -3  -1    3.20    0.90
   7  -3  -1    3.20    1.20
  -7  -3   1    3.60    0.80
  -7   3   1    4.30    1.20
  -7   3   1    1.90    1.00
   7   3  -1    4.90    1.50
   7   3  -1    3.70    1.00
   7   3  -1    3.80    0.90
   7   3  -1    4.30    1.10
  -6  -3   1   52.69    2.90
   6  -3  -1   54.49    3.10
  -6  -3   1   48.50    3.20
  -6  -3   1   51.89    2.80
   6  -3  -1   54.69    3.00
   6  -3  -1   50.69    3.20
   6  -3  -1   48.90    3.10
   6   3  -1   50.39    2.90
  -6   3   1   49.20    3.10
   6   3  -1   51.19    2.90
   6   3  -1   50.29    3.30
  -6   3   1   50.59    3.10
   6   3  -1   50.19    3.10
   5  -3  -1  781.62   36.30
   5  -3  -1  756.32   36.40
  -5  -3   1  775.22   36.30
   5  -3  -1  776.92   36.30
   5  -3  -1  775.32   36.30
  -5  -3   1  748.03   36.30
  -5  -3   1  738.33   36.20
  -5   3   1  761.02   36.30
   5   3  -1  748.63   36.30
   5   3  -1  761.32   36.20
   5   3  -1  769.62   36.40
  -5   3   1  735.73   36.30
   4  -3  -1   15.80    1.40
  -4  -3   1   14.20    1.30
   4  -3  -1   15.00    1.40
  -4  -3   1   14.40    1.50
  -4  -3   1   16.40    1.30
  -4  -3   1   14.20    1.40
   4  -3  -1   14.60    1.50
   4  -3  -1   16.00    1.60
  -4   3   1   15.60    1.40
  -4   3   1   15.80    1.50
   4   3  -1   14.80    1.60
   4   3  -1   13.60    1.30
   4   3  -1   15.20    1.30
   4   3  -1   13.20    1.40
  -4   3   1   14.20    1.40
   3  -3  -1  180.08    8.80
  -3  -3   1  177.48    8.80
   3  -3  -1  183.08    8.80
  -3  -3   1  180.88    8.80
  -3  -3   1  177.28    8.80
  -3  -3   1  184.78    8.80
   3  -3  -1  178.38    8.90
   3   3  -1  181.18    8.80
  -3   3   1  178.78    8.80
  -3   3   1  178.28    8.90
   3   3  -1  183.98    8.80
   3   3  -1  181.58    8.80
   3   3  -1  179.88    8.80
  -2  -3   1    1.00    0.50
   2  -3  -1    1.40    0.40
  -2  -3   1    1.70    0.50
  -2  -3   1    1.00    0.50
   2  -3  -1    0.50    0.60
   2  -3  -1    1.80    0.50
   2  -3  -1   -0.60    0.50
  -2  -3   1    1.40    0.50
   2   3  -1    2.20    0.50
   2   3  -1    2.20    0.60
   2   3  -1    0.90    0.50
  -2   3   1    1.40    0.60
  -2   3   1    1.30    0.40
   2   3  -1    1.60    0.50
   1  -3  -1  549.15   26.40
  -1  -3   1  553.84   26.40
   1  -3  -1  581.94   26.40
  -1  -3   1  548.35   26.30
  -1  -3   1  574.84   26.40
   1  -3  -1  552.04   26.30
  -1  -3   1  515.65   26.40
   1  -3  -1  546.75   26.30
   1   3  -1  551.84   26.30
  -1   3   1  544.75   26.30
  -1   3   1  556.04   26.30
   1   3  -1  571.84   26.40
   1   3  -1  543.85   26.40
   1   3  -1  553.04   26.30
   0  -3   1    6.90    0.50
   0  -3  -1    8.10    0.80
   0  -3   1    6.70    0.60
   0  -3  -1    6.30    0.60
   0  -3   1    6.30    0.70
   0  -3   1    6.60    0.80
   0  -3  -1    5.20    0.70
   0  -3  -1    6.40    0.70
   0   3   1    7.20    0.60
   0   3  -1    5.40    0.60
   0   3  -1    7.40    0.80
   0   3   1    5.20    0.70
   0   3   1    6.30    0.60
   0   3  -1    6.50    0.80
   0   3   1    8.90    0.80
   0   3  -1    6.40    0.60
   1  -3   1   81.19    3.90
  -1  -3  -1   80.59    4.00
   1  -3   1   82.89    4.10
  -1  -3  -1   79.79    4.00
   1  -3   1   74.49    4.10
   1  -3   1   73.09    4.00
  -1  -3  -1   79.79    4.10
  -1  -3  -1   83.39    3.90
   1   3   1   78.19    3.90
  -1   3  -1   78.99    4.10
  -1   3  -1   81.09    3.90
   1   3   1   80.29    4.00
   1   3   1   80.79    4.10
  -1   3  -1   79.59    4.10
   1   3   1   82.29    4.00
  -1   3  -1   78.79    4.00
  -2  -3  -1  116.09    5.70
   2  -3   1  115.99    5.60
  -2  -3  -1  117.19    5.70
  -2  -3  -1  115.39    5.70
   2  -3   1  115.39    5.80
   2  -3   1  113.89    5.80
   2  -3   1  116.19    5.60
   2  -3   1  118.79    5.70
  -2   3  -1  114.29    5.80
  -2   3  -1  117.49    5.70
   2   3   1  113.29    5.70
   2   3   1  113.59    5.80
   2   3   1  116.99    5.70
  -2   3  -1  118.39    5.80
   2   3   1  118.79    5.70
   3  -3   1  134.19    6.40
  -3  -3  -1  135.29    6.40
   3  -3   1  127.59    6.50
  -3  -3  -1  128.49    6.50
   3  -3   1  132.49    6.50
  -3  -3  -1  135.29    6.40
   3  -3   1  132.99    6.40
  -3  -3  -1  126.59    6.40
   3   3   1  122.99    6.40
   3   3   1  131.59    6.50
  -3   3  -1  132.99    6.50
   3   3   1  128.29    6.40
  -3   3  -1  126.49    6.50
  -3   3  -1  133.19    6.40
   3   3   1  125.89    6.40
   4  -3   1  768.02   37.00
  -4  -3  -1  784.42   37.00
  -4  -3  -1  766.62   37.10
  -4  -3  -1  780.92   37.00
   4  -3   1  795.02   37.00
   4  -3   1  794.02   37.10
   4  -3   1  782.92   37.00
   4  -3   1  800.02   37.00
   4   3   1  746.03   37.00
  -4   3  -1  766.22   37.00
   4   3   1  769.22   37.00
  -4   3  -1  766.72   37.10
   4   3   1  759.42   37.00
   4   3   1  793.72   37.10
   5  -3   1  404.96   19.00
  -5  -3  -1  392.26   18.90
  -5  -3  -1  405.76   19.00
   5  -3   1  404.66   19.00
  -5  -3  -1  389.36   19.20
   5  -3   1  413.86   19.10
   5  -3   1  404.06   19.10
   5  -3   1  377.76   19.00
   5   3   1  410.56   19.10
   5   3   1  397.66   19.00
  -5   3  -1  395.86   19.00
   5   3   1  392.26   18.90
  -5   3  -1  346.47   19.20
   5   3   1  389.26   19.00
  -6  -3  -1  167.08    8.20
  -6  -3  -1  161.48    8.40
  -6  -3  -1  166.78    8.10
   6  -3   1  165.08    8.30
   6  -3   1  168.18    8.20
   6  -3   1  171.98    8.30
   6  -3   1  165.28    8.30
   6  -3   1  158.78    8.20
   6  -3   1  163.68    8.40
   6   3   1  170.48    8.40
   6   3   1  164.28    8.20
  -6   3  -1  164.18    8.30
   6   3   1  165.98    8.30
  -6   3  -1  164.88    8.30
   6   3   1  165.58    8.10
   7  -3   1   64.09    3.70
   7  -3   1   67.49    3.50
  -7  -3  -1   66.99    3.30
  -7  -3  -1   65.29    3.60
  -7  -3  -1   61.29    3.90
   7  -3   1   64.49    3.90
   7  -3   1   60.09    3.90
   7  -3   1   68.49    3.60
   7  -3   1   64.99    3.80
   7   3   1   62.39    3.80
   7   3   1   59.29    4.00
   7   3   1   62.49    3.70
  -7   3  -1   64.69    3.80
   7   3   1   63.49    3.40
  -7   3  -1   58.39    3.70
   7   3   1   62.79    3.60
   8  -3   1   28.60    2.20
   8  -3   1   29.90    2.90
   8  -3   1   29.30    2.40
  -8  -3  -1   28.90    2.50
  -8  -3  -1   27.20    2.80
   8  -3   1   30.30    2.70
   8  -3   1   30.60    2.30
  -8  -3  -1   31.10    1.90
  -8   3  -1   33.00    2.60
   8   3   1   30.40    2.40
   8   3   1   33.40    2.60
  -8   3  -1   29.90    2.60
   8   3   1   31.70    2.00
  -9  -3  -1   19.90    2.10
   9  -3   1   23.00    2.10
  -9  -3  -1   23.00    1.60
   9  -3   1   22.10    2.10
   9  -3   1   19.80    2.10
  -9  -3  -1   22.40    2.40
   9   3   1   23.70    2.20
  -9   3  -1   22.90    2.20
   9   3   1   23.50    2.40
   9   3   1   18.50    1.80
  -9   3  -1   20.70    2.00
  10  -3   1   -0.50    1.40
 -10  -3  -1    1.30    0.80
 -10  -3  -1    1.00    1.70
  10  -3   1    0.70    1.30
 -10   3  -1   -2.10    1.50
  10   3   1   -1.10    1.40
  10   3   1    2.20    1.40
  11  -3   1    2.70    1.60
  11  -3   1    2.00    1.40
 -11  -3  -1    1.00    2.00
  11   3   1    0.90    1.60
  11   3   1    0.00    1.60
 -11   3  -1    1.30    1.90
  12  -3   1    0.70    1.70
 -12  -3  -1   -3.90    2.30
  12  -3   1    0.30    1.90
  12  -3   1    2.00    1.60
  12   3   1    2.00    2.00
  12   3   1    1.30    1.90
 -12   3  -1   -1.90    2.10
 -13  -3  -1    3.10    2.80
  13  -3   1    3.40    2.60
  13  -3   1    0.70    2.00
 -13   3  -1    2.00    2.80
  13   3   1    4.80    2.10
  13   3   1    1.30    2.30
  14  -3   1    8.30    3.20
  14  -3   1    5.70    2.60
 -14  -3  -1    9.30    3.70
  14   3   1   13.50    3.00
 -14   3  -1    4.70    3.30
  14   3   1   12.20    2.80
  15  -3   1    5.90    3.50
  15  -3   1    2.80    2.80
 -15  -3  -1    7.30    4.00
 -15   3  -1    0.40    5.00
  15   3   1   -5.90    3.00
  15   3   1    5.00    3.10
 -16  -3  -1   20.40    5.20
  16  -3   1   21.70    3.90
  16  -3   1   24.60    4.50
  16   3   1   25.60    4.00
 -16   3  -1   23.80    4.90
  16   3   1   16.70    4.20
  16  -4  -1    1.40    4.00
  16  -4  -1   -1.90    3.10
 -16  -4   1    3.70    4.70
  16   4  -1   -8.30    3.80
  16   4  -1    7.80    3.50
 -16   4   1    3.50    4.10
  15  -4  -1   22.60    3.50
 -15  -4   1   26.10    4.70
  15  -4  -1   22.20    3.90
 -15   4   1   16.40    5.50
  15   4  -1   34.90    3.90
  15   4  -1   22.20    3.80
 -14  -4   1   13.40    3.70
  14  -4  -1    6.90    3.30
  14  -4  -1    6.50    2.50
  14  -4  -1    8.50    2.60
 -14   4   1   11.90    3.40
  14   4  -1   12.30    3.20
  14   4  -1   15.80    2.90
  13  -4  -1   13.80    2.50
 -13  -4   1   13.80    3.30
  13  -4  -1   18.60    2.60
  13   4  -1   17.30    2.70
  13   4  -1   13.90    2.80
 -13   4   1   17.30    3.20
  12  -4  -1    2.90    2.30
  12  -4  -1    3.90    2.00
 -12  -4   1    1.10    2.50
 -12  -4   1    0.30    1.30
  12  -4  -1    0.80    1.90
 -12   4   1   -3.10    2.10
  12   4  -1    1.10    2.00
  12   4  -1   -0.80    1.80
  11  -4  -1    2.90    1.70
  11  -4  -1    5.10    1.80
  11  -4  -1    5.50    1.80
 -11  -4   1    3.20    1.20
 -11  -4   1    3.70    2.40
  11   4  -1    5.80    1.80
  11   4  -1    4.90    1.70
  11   4  -1    4.10    1.60
 -11   4   1    3.50    2.00
  10  -4  -1    5.20    1.60
 -10  -4   1    1.50    1.80
  10  -4  -1    1.90    1.60
 -10  -4   1    3.50    1.10
  10  -4  -1    2.80    1.60
  10   4  -1    2.40    1.60
  10   4  -1    2.90    1.60
 -10   4   1    3.10    1.70
  10   4  -1    2.10    1.40
  -9  -4   1   10.80    2.00
   9  -4  -1   11.40    1.60
  -9  -4   1    9.30    1.60
   9  -4  -1   11.20    1.70
   9  -4  -1   11.20    1.60
  -9  -4   1   12.30    1.30
   9   4  -1   11.10    1.60
   9   4  -1   10.20    1.60
  -9   4   1    8.10    1.70
   9   4  -1   12.40    1.50
   8  -4  -1   14.30    1.90
  -8  -4   1   14.20    1.60
  -8  -4   1   15.40    1.60
   8  -4  -1   13.30    1.70
   8  -4  -1   13.20    1.70
  -8  -4   1   11.90    1.90
   8  -4  -1   14.80    1.70
   8   4  -1   15.10    1.60
   8   4  -1   15.10    1.50
  -8   4   1   12.10    1.60
  -8   4   1   12.70    1.60
   8   4  -1   11.30    1.60
  -7  -4   1   26.30    2.10
   7  -4  -1   28.50    2.40
  -7  -4   1   24.30    1.80
   7  -4  -1   28.20    2.30
   7  -4  -1   27.30    2.60
   7  -4  -1   24.70    2.30
  -7  -4   1   21.50    2.40
   7  -4  -1   31.30    2.70
   7   4  -1   28.50    2.10
  -7   4   1   23.80    2.30
  -7   4   1   22.10    2.20
   7   4  -1   27.20    2.30
   7   4  -1   25.10    2.10
  -6  -4   1   41.50    2.40
   6  -4  -1   36.90    2.50
   6  -4  -1   35.50    2.80
  -6  -4   1   36.00    2.20
   6  -4  -1   35.80    2.60
   6  -4  -1   39.70    2.60
  -6  -4   1   36.90    2.70
   6   4  -1   35.70    2.30
   6   4  -1   33.20    2.40
   6   4  -1   29.90    2.40
  -6   4   1   35.70    2.50
  -6   4   1   36.20    2.50
   6   4  -1   35.30    2.80
   5  -4  -1  151.68    7.40
   5  -4  -1  149.99    7.60
  -5  -4   1  148.89    7.40
   5  -4  -1  146.49    7.50
  -5  -4   1  151.18    7.40
  -5  -4   1  146.99    7.60
   5  -4  -1  141.69    7.50
   5  -4  -1  148.29    7.40
  -5   4   1  147.29    7.50
   5   4  -1  151.88    7.40
   5   4  -1  144.29    7.50
  -5   4   1  144.09    7.50
   5   4  -1  149.79    7.40
   5   4  -1  150.08    7.60
   4  -4  -1    3.70    1.00
  -4  -4   1    4.10    0.80
  -4  -4   1    3.00    1.00
  -4  -4   1    4.20    0.90
   4  -4  -1    3.30    0.90
   4  -4  -1    4.60    0.90
   4  -4  -1    5.10    1.00
   4  -4  -1    4.40    1.10
  -4  -4   1    5.50    0.90
  -4   4   1    3.00    0.90
   4   4  -1    3.20    0.90
   4   4  -1    4.20    1.00
   4   4  -1    5.00    1.00
   4   4  -1    5.20    1.10
  -4   4   1    3.70    1.20
   3  -4  -1   52.49    2.80
  -3  -4   1   52.79    2.90
   3  -4  -1   51.19    3.00
  -3  -4   1   50.69    2.90
  -3  -4   1   50.59    2.90
   3  -4  -1   49.10    3.00
  -3  -4   1   49.20    2.90
   3  -4  -1   53.69    2.70
   3  -4  -1   52.39    3.00
   3  -4  -1   51.69    2.80
   3   4  -1   50.99    2.80
   3   4  -1   53.89    2.90
   3   4  -1   47.30    2.90
   3   4  -1   51.29    2.90
  -3   4   1   50.89    2.80
  -3   4   1   51.29    3.00
  -2  -4   1   42.60    2.60
  -2  -4   1   44.10    2.50
  -2  -4   1   46.80    2.60
  -2  -4   1   46.40    2.50
   2  -4  -1   40.60    2.60
   2  -4  -1   44.50    2.60
   2  -4  -1   47.90    2.40
   2  -4  -1   45.00    2.40
  -2   4   1   45.40    2.40
  -2   4   1   41.00    2.60
   2   4  -1   45.40    2.50
   2   4  -1   45.40    2.50
   2   4  -1   45.00    2.60
   2   4  -1   44.20    2.60
   1  -4  -1  117.69    6.10
   1  -4  -1  111.99    5.90
  -1  -4   1  123.29    6.00
  -1  -4   1  118.59    6.00
  -1  -4   1  121.59    5.90
  -1  -4   1  127.59    5.90
   1  -4  -1  122.59    6.10
   1  -4  -1  122.79    5.90
   1   4  -1  122.49    6.10
  -1   4   1  123.29    5.90
   1   4  -1  115.69    6.00
  -1   4   1  122.89    5.90
   1   4  -1  120.09    5.90
  -1   4   1  117.09    6.10
   0  -4  -1    1.50    0.70
   0  -4  -1    2.00    0.50
   0  -4   1    1.20    0.50
   0  -4  -1    2.10    0.40
   0  -4   1    1.90    0.80
   0  -4  -1    1.40    0.70
   0  -4   1    2.50    0.70
   0  -4   1    1.80    0.40
   0   4   1    2.20    0.50
   0   4  -1    0.10    0.70
   0   4  -1    2.00    0.50
   0   4  -1    1.10    0.70
   0   4   1    1.40    0.70
   0   4   1    2.40    0.70
   0   4   1    0.70    0.70
   0   4  -1    2.00    0.60
   1  -4   1  543.75   25.70
  -1  -4  -1  554.74   25.80
   1  -4   1  523.75   25.60
  -1  -4  -1  542.15   25.70
  -1  -4  -1  525.95   25.80
   1  -4   1  534.35   25.80
   1  -4   1  547.55   25.80
   1   4   1  523.75   25.80
  -1   4  -1  540.35   25.60
   1   4   1  559.04   25.70
  -1   4  -1  546.75   25.80
  -1   4  -1  542.45   25.80
   1   4   1  525.65   25.70
  -1   4  -1  526.25   25.70
   1   4   1  552.94   25.80
  -2  -4  -1    8.40    0.90
  -2  -4  -1    6.30    0.90
   2  -4   1    9.10    0.80
  -2  -4  -1    6.60    0.70
   2  -4   1    7.60    0.80
   2  -4   1    7.00    1.00
   2  -4   1    6.30    0.90
  -2  -4  -1    8.10    0.90
   2  -4   1    7.30    0.70
  -2   4  -1    7.30    1.00
   2   4   1    7.40    1.00
   2   4   1    7.70    1.00
  -2   4  -1    5.40    0.90
   2   4   1    6.30    0.90
   2   4   1    7.20    0.80
  -2   4  -1    6.50    0.80
  -3  -4  -1  244.28   12.20
   3  -4   1  256.67   12.10
  -3  -4  -1  247.58   12.30
  -3  -4  -1  260.07   12.20
   3  -4   1  249.38   12.10
   3  -4   1  258.47   12.20
   3  -4   1  244.58   12.30
   3  -4   1  258.37   12.40
  -3  -4  -1  259.07   12.30
   3   4   1  254.77   12.20
  -3   4  -1  246.28   12.30
   3   4   1  249.48   12.20
   3   4   1  259.47   12.30
  -3   4  -1  252.27   12.20
   3   4   1  246.58   12.30
  -4  -4  -1    0.00    0.90
   4  -4   1    0.80    0.80
   4  -4   1    0.20    0.70
   4  -4   1    0.90    0.90
   4  -4   1    0.30    1.00
  -4  -4  -1    0.70    0.80
  -4  -4  -1    2.00    0.70
  -4  -4  -1    0.50    0.70
   4   4   1    1.90    0.90
   4   4   1    1.40    0.90
   4   4   1    1.30    0.80
   4   4   1    2.00    0.80
  -4   4  -1    1.20    0.90
  -5  -4  -1  661.23   30.80
   5  -4   1  653.93   30.90
   5  -4   1  642.04   30.90
   5  -4   1  669.53   30.90
   5  -4   1  651.73   30.80
  -5  -4  -1  642.64   30.70
  -5  -4  -1  637.54   30.90
   5  -4   1  616.44   30.80
   5   4   1  626.54   30.80
  -5   4  -1  617.04   30.90
   5   4   1  650.73   30.80
  -5   4  -1  643.94   30.80
   5   4   1  660.23   30.90
  -6  -4  -1   21.10    2.20
   6  -4   1   27.60    2.30
  -6  -4  -1   21.00    1.70
   6  -4   1   25.70    2.10
   6  -4   1   21.50    1.90
   6  -4   1   22.80    2.00
   6  -4   1   19.90    1.80
  -6  -4  -1   21.90    1.90
  -6   4  -1   19.60    2.00
   6   4   1   21.10    2.30
   6   4   1   17.70    1.70
   6   4   1   22.50    2.00
   6   4   1   22.70    2.00
  -6   4  -1   18.90    1.90
   7  -4   1   27.20    2.60
   7  -4   1   25.90    2.30
   7  -4   1   22.90    2.30
  -7  -4  -1   26.60    2.20
   7  -4   1   27.30    2.30
   7  -4   1   23.00    2.20
  -7  -4  -1   24.10    2.50
  -7  -4  -1   25.50    1.80
   7   4   1   23.70    2.00
  -7   4  -1   23.60    2.30
   7   4   1   23.20    2.10
   7   4   1   23.80    2.10
   8  -4   1    2.20    1.20
   8  -4   1    2.60    1.40
  -8  -4  -1    1.60    0.80
   8  -4   1    3.60    1.30
  -8  -4  -1    0.00    1.30
  -8  -4  -1    1.40    1.30
   8  -4   1    3.20    1.30
  -8   4  -1    3.20    1.30
   8   4   1    4.20    1.20
   8   4   1    1.60    1.10
  -8   4  -1    0.30    1.10
   8   4   1    2.80    1.10
  -9  -4  -1    6.10    1.70
  -9  -4  -1   12.70    1.90
  -9  -4  -1   11.50    1.20
   9  -4   1    8.50    1.60
   9  -4   1    8.50    1.90
   9  -4   1    9.50    1.60
   9  -4   1   10.50    1.60
   9   4   1    9.80    1.50
  -9   4  -1    8.40    1.60
   9   4   1    9.70    1.30
   9   4   1   10.30    1.70
  -9   4  -1    8.60    1.70
  10  -4   1    5.80    1.70
 -10  -4  -1    5.90    1.10
  10  -4   1    8.00    1.60
  10  -4   1    7.00    1.60
 -10  -4  -1    7.60    2.20
  10   4   1    7.00    1.70
 -10   4  -1    9.20    1.90
 -10   4  -1    4.50    1.70
  10   4   1    8.40    1.80
  10   4   1    5.90    1.30
  11  -4   1    0.90    1.70
 -11  -4  -1   -0.60    1.00
  11  -4   1   -0.50    1.50
 -11  -4  -1   -3.50    2.00
  11  -4   1    0.90    1.70
  11   4   1    1.50    1.80
  11   4   1    0.80    1.30
 -11   4  -1    1.80    1.90
  11   4   1    0.30    1.80
  12  -4   1    1.90    1.80
 -12  -4  -1    1.70    2.50
  12  -4   1   -2.00    1.80
 -12   4  -1   -0.20    2.20
  12   4   1    2.60    1.90
  12   4   1    0.90    2.00
  13  -4   1    2.50    2.00
  13  -4   1    0.50    2.10
 -13  -4  -1   -0.10    3.00
 -13   4  -1    3.00    2.60
  13   4   1    6.00    2.40
  13   4   1    3.50    2.30
  14  -4   1    5.70    2.30
  14  -4   1    5.90    2.60
 -14  -4  -1    7.00    3.50
 -14   4  -1    3.50    3.20
  14   4   1    9.40    3.00
  14   4   1    7.40    3.00
 -15  -4  -1    7.00    4.20
  15  -4   1   12.60    3.90
  15   4   1    8.90    3.40
  15   4   1    9.80    3.40
  16  -4   1    6.00    4.20
 -16  -4  -1    1.40    4.70
  16  -4   1    3.20    3.30
  16   4   1    6.00    3.80
  16   4   1    4.70    3.70
 -16   4  -1   10.90    4.50
  15  -5  -1   25.90    4.40
  15  -5  -1   21.90    3.70
 -15  -5   1   30.00    5.00
  15   5  -1   27.20    3.80
  15   5  -1   24.70    4.10
  14  -5  -1    1.10    2.50
 -14  -5   1    0.00    3.50
  14  -5  -1    0.00    2.70
  14   5  -1    5.40    2.80
  14   5  -1    1.10    2.70
 -14   5   1   -0.30    3.10
  13  -5  -1    1.70    2.40
  13  -5  -1    3.70    2.40
  13   5  -1   -3.40    2.20
 -13   5   1    3.30    2.70
  13   5  -1    2.70    2.30
 -12  -5   1    0.30    1.50
  12  -5  -1    0.60    2.10
  12  -5  -1    1.00    2.00
 -12  -5   1    2.20    2.50
 -12   5   1   -0.20    2.40
  12   5  -1   -2.10    2.10
  12   5  -1    3.40    2.10
  11  -5  -1   69.09    5.00
 -11  -5   1   82.29    5.80
  11  -5  -1   81.09    5.20
 -11  -5   1   71.89    4.60
  11   5  -1   88.49    5.10
  11   5  -1   78.99    4.90
  11   5  -1   81.59    5.20
 -11   5   1   81.99    5.40
 -10  -5   1    0.20    2.00
  10  -5  -1    2.70    1.70
  10  -5  -1    0.10    1.70
 -10  -5   1    1.50    2.00
  10   5  -1    3.80    1.60
  10   5  -1    2.50    1.60
  10   5  -1    1.10    1.70
 -10   5   1    2.70    1.90
   9  -5  -1   73.09    4.50
  -9  -5   1   67.99    4.80
  -9  -5   1   66.29    4.30
   9  -5  -1   77.79    4.60
   9  -5  -1   68.49    4.60
  -9  -5   1   64.89    4.90
  -9   5   1   74.19    4.60
   9   5  -1   73.99    4.40
  -9   5   1   76.19    4.50
   9   5  -1   70.49    4.40
   9   5  -1   70.99    4.40
  -8  -5   1    2.70    1.10
   8  -5  -1    4.60    1.60
   8  -5  -1    3.90    1.70
   8  -5  -1    1.70    1.40
  -8  -5   1    3.90    1.30
  -8  -5   1    1.50    1.60
  -8   5   1    3.20    1.30
   8   5  -1    2.30    1.40
   8   5  -1    1.60    1.40
   8   5  -1    2.20    1.30
   7  -5  -1   27.90    2.60
   7  -5  -1   27.70    2.40
  -7  -5   1   28.00    2.10
   7  -5  -1   25.80    2.50
  -7  -5   1   29.60    2.30
  -7  -5   1   22.30    2.30
   7  -5  -1   26.50    2.70
   7   5  -1   24.50    2.30
   7   5  -1   28.00    2.40
  -7   5   1   26.40    2.40
   7   5  -1   27.40    2.40
   6  -5  -1    3.80    1.20
  -6  -5   1    4.60    1.00
  -6  -5   1    3.10    1.10
   6  -5  -1    1.30    1.50
   6  -5  -1    4.90    1.30
   6  -5  -1    2.80    1.10
  -6  -5   1    2.40    1.10
   6  -5  -1    4.10    1.30
  -6  -5   1    3.50    1.20
  -6   5   1    2.70    1.00
   6   5  -1    3.70    1.20
   6   5  -1    3.00    1.10
   6   5  -1    6.00    1.50
   6   5  -1    2.40    1.10
   5  -5  -1    3.80    1.20
   5  -5  -1    4.10    0.90
  -5  -5   1    1.60    0.90
   5  -5  -1    2.50    1.10
   5  -5  -1    3.50    1.10
  -5  -5   1    2.10    1.10
   5  -5  -1    3.90    1.40
  -5  -5   1    3.70    0.90
   5  -5  -1    3.00    0.80
  -5  -5   1    2.70    0.90
   5   5  -1    2.60    1.20
  -5   5   1    1.50    1.00
  -5   5   1    1.50    1.00
   5   5  -1    2.40    1.00
   5   5  -1    2.50    1.00
  -4  -5   1   -0.10    0.90
  -4  -5   1    0.50    0.80
   4  -5  -1   -0.20    1.20
   4  -5  -1   -0.20    0.70
   4  -5  -1    0.80    1.00
   4  -5  -1    1.30    1.10
  -4  -5   1    0.40    0.90
   4  -5  -1    2.60    0.80
   4  -5  -1    0.70    0.70
  -4   5   1    0.30    0.80
   4   5  -1    0.70    0.90
  -4   5   1    0.20    0.90
   4   5  -1   -0.30    0.90
   4   5  -1   -1.30    0.90
   3  -5  -1  279.87   13.40
   3  -5  -1  283.37   13.50
   3  -5  -1  278.77   13.40
  -3  -5   1  280.37   13.50
   3  -5  -1  264.27   13.70
   3  -5  -1  274.57   13.70
  -3  -5   1  277.87   13.60
  -3  -5   1  285.07   13.60
  -3  -5   1  274.87   13.50
  -3   5   1  270.57   13.60
   3   5  -1  272.17   13.60
   3   5  -1  285.57   13.50
   3   5  -1  274.97   13.50
  -3   5   1  285.97   13.50
   3   5  -1  285.77   13.60
   2  -5  -1    0.70    0.60
   2  -5  -1    1.10    0.70
  -2  -5   1    0.70    0.70
   2  -5  -1    1.30    1.10
  -2  -5   1    0.90    0.80
  -2  -5   1   -0.60    0.70
  -2  -5   1   -0.30    1.00
   2   5  -1    0.70    0.70
  -2   5   1   -0.30    0.70
   2   5  -1    0.10    0.80
   2   5  -1   -0.70    0.70
   2   5  -1    1.00    1.00
  -1  -5   1  182.58    8.80
   1  -5  -1  173.68    8.90
   1  -5  -1  173.48    8.60
   1  -5  -1  181.48    8.60
  -1  -5   1  176.38    8.60
  -1  -5   1  171.78    8.80
   1  -5  -1  180.08    8.80
  -1  -5   1  184.18    8.70
  -1   5   1  173.38    8.60
   1   5  -1  181.18    8.70
   1   5  -1  170.08    8.80
  -1   5   1  180.48    8.60
   1   5  -1  183.48    8.60
  -1   5   1  167.28    8.90
   1   5  -1  180.98    8.90
   0  -5  -1   34.10    2.30
   0  -5   1   35.10    2.10
   0  -5   1   31.50    2.40
   0  -5   1   34.90    2.30
   0  -5   1   33.00    1.90
   0  -5  -1   32.40    2.40
   0  -5  -1   32.80    2.00
   0  -5  -1   34.60    2.00
   0   5  -1   38.10    2.20
   0   5   1   36.30    2.00
   0   5   1   34.30    2.00
   0   5  -1   40.20    2.50
   0   5   1   40.90    2.40
   0   5  -1   28.90    2.20
   0   5   1   31.80    2.30
   0   5  -1   33.80    1.90
   1  -5   1    4.20    0.60
  -1  -5  -1    2.30    1.00
   1  -5   1    3.50    1.00
   1  -5   1    3.00    1.00
   1  -5   1    5.00    0.80
  -1  -5  -1    4.20    1.00
  -1  -5  -1    4.60    0.80
  -1  -5  -1    5.30    0.70
   1   5   1    4.90    0.70
   1   5   1    3.40    0.90
  -1   5  -1    4.70    1.10
  -1   5  -1    4.60    0.60
   1   5   1    3.50    0.80
  -1   5  -1    2.70    1.00
  -1   5  -1    4.10    0.80
   1   5   1    3.30    0.90
  -2  -5  -1    0.50    0.60
  -2  -5  -1   -0.40    0.90
   2  -5   1    1.00    1.00
   2  -5   1    0.90    0.50
  -2  -5  -1    0.40    0.90
   2  -5   1    0.10    0.70
  -2  -5  -1   -0.30    0.80
   2   5   1    0.90    0.90
  -2   5  -1    0.70    0.80
   2   5   1   -0.40    0.90
  -2   5  -1   -0.60    1.00
   2   5   1    0.40    0.60
   2   5   1   -0.50    0.80
  -3  -5  -1  367.06   17.50
  -3  -5  -1  377.16   17.40
  -3  -5  -1  359.86   17.40
   3  -5   1  354.16   17.20
   3  -5   1  368.26   17.40
  -3  -5  -1  348.17   17.40
   3  -5   1  375.66   17.60
   3  -5   1  357.16   17.20
   3   5   1  375.86   17.50
  -3   5  -1  350.66   17.40
   3   5   1  365.36   17.40
  -3   5  -1  361.06   17.50
   3   5   1  359.76   17.40
   3   5   1  327.97   17.50
   4  -5   1  116.99    6.20
   4  -5   1  119.49    6.30
  -4  -5  -1  120.69    6.10
  -4  -5  -1  120.39    6.10
  -4  -5  -1  124.39    6.20
   4  -5   1  121.79    5.90
  -4  -5  -1  114.59    6.20
   4  -5   1  122.19    6.00
   4  -5   1  126.79    6.10
  -4   5  -1  106.29    6.30
   4   5   1  120.79    6.10
  -4   5  -1  116.89    6.30
   4   5   1  124.29    6.20
   4   5   1  122.69    6.20
   5  -5   1   23.10    2.20
  -5  -5  -1   25.40    2.00
   5  -5   1   24.00    2.20
  -5  -5  -1   27.30    2.10
  -5  -5  -1   24.20    2.20
  -5  -5  -1   25.20    1.90
   5  -5   1   19.40    2.00
   5  -5   1   23.10    1.80
   5  -5   1   26.60    2.20
   5   5   1   25.30    2.40
   5   5   1   26.50    2.00
  -5   5  -1   25.20    2.30
   5   5   1   26.50    2.00
  -5   5  -1   24.00    2.10
   5   5   1   22.90    2.10
   6  -5   1   53.39    3.20
  -6  -5  -1   56.29    3.30
   6  -5   1   54.89    3.60
  -6  -5  -1   53.59    3.10
   6  -5   1   52.29    3.40
   6  -5   1   56.49    3.50
   6  -5   1   51.99    3.70
  -6  -5  -1   53.79    3.50
   6   5   1   55.29    3.30
  -6   5  -1   57.69    3.40
   6   5   1   57.59    3.30
   6   5   1   51.59    3.30
   6   5   1   55.69    3.60
   7  -5   1   11.40    1.70
   7  -5   1   15.70    1.60
   7  -5   1   11.80    1.60
  -7  -5  -1    9.80    1.70
  -7  -5  -1   13.30    1.30
  -7  -5  -1   13.60    1.60
  -7   5  -1   13.50    1.60
   7   5   1   15.00    1.60
   7   5   1   11.40    1.50
   7   5   1   12.10    1.60
   8  -5   1    5.50    1.50
   8  -5   1    4.90    1.50
   8  -5   1    7.40    1.70
   8  -5   1    5.50    1.60
  -8  -5  -1    4.20    1.50
  -8  -5  -1    5.20    1.70
  -8  -5  -1    5.60    1.10
   8   5   1    3.60    1.40
  -8   5  -1    4.90    1.50
  -8   5  -1    7.50    1.40
   8   5   1    3.10    1.40
   8   5   1    5.00    1.40
  -9  -5  -1    2.90    1.10
   9  -5   1    2.50    1.80
   9  -5   1    2.40    1.60
  -9  -5  -1    0.50    1.80
   9  -5   1    3.50    1.80
   9  -5   1   -1.40    1.50
   9   5   1    4.90    1.40
  -9   5  -1    2.20    1.60
  -9   5  -1    4.70    1.60
   9   5   1    5.70    1.60
   9   5   1    5.00    1.40
 -10  -5  -1   64.59    3.70
  10  -5   1   67.99    4.40
  10  -5   1   62.49    4.40
 -10  -5  -1   66.69    4.90
  10  -5   1   62.89    4.40
  10   5   1   67.49    4.40
 -10   5  -1   65.69    4.40
 -10   5  -1   60.79    4.50
  10   5   1   65.59    4.40
  10   5   1   64.49    4.10
  11  -5   1    0.10    1.80
 -11  -5  -1    0.90    1.20
 -11  -5  -1   -2.10    2.20
  11  -5   1   -0.90    1.80
  11   5   1    3.40    1.90
  11   5   1    2.50    1.60
 -11   5  -1    1.90    1.90
  11   5   1    1.40    1.80
  12  -5   1    0.10    2.00
  12  -5   1    0.20    2.10
 -12  -5  -1    2.60    2.80
  12   5   1    1.30    2.10
  12   5   1    3.70    2.20
 -12   5  -1    0.20    2.30
  13  -5   1    9.60    2.50
 -13  -5  -1   10.10    3.70
  13  -5   1    3.40    2.60
  13   5   1    8.10    2.60
 -13   5  -1   10.40    3.00
  13   5   1    9.70    2.70
 -14  -5  -1   -5.60    3.70
  14  -5   1    3.90    2.60
  14  -5   1    1.90    2.50
 -14   5  -1    1.80    3.10
  14   5   1    2.10    2.80
  14   5   1    2.10    2.90
  15  -5   1    4.60    3.80
  15  -5   1    1.60    2.90
 -15  -5  -1    4.10    4.40
  15   5   1    0.20    3.40
 -15   5  -1    0.90    4.30
  15   5   1    5.70    3.40
  15  -6  -1    2.80    3.90
  15  -6  -1    1.80    2.90
 -15  -6   1    6.60    4.80
  15   6  -1    1.20    3.50
  15   6  -1    0.20    3.40
  14  -6  -1   -0.70    3.00
 -14  -6   1   -5.00    3.60
  14   6  -1   -0.90    3.10
  14   6  -1   -1.70    2.90
  13  -6  -1   -1.10    2.60
 -13  -6   1    0.80    3.20
  13  -6  -1    3.30    2.60
  13   6  -1    3.00    2.80
  13   6  -1    1.90    2.50
 -12  -6   1   16.70    2.10
  12  -6  -1   16.60    2.80
 -12  -6   1   20.80    3.30
  12  -6  -1   20.50    2.90
  12   6  -1   14.10    2.60
  12   6  -1   19.60    2.80
 -11  -6   1    2.70    2.50
  11  -6  -1    4.60    2.30
  11  -6  -1    3.10    2.10
 -11  -6   1    3.00    1.50
  11   6  -1    4.70    2.10
  11   6  -1    3.70    2.00
 -10  -6   1   11.30    2.40
 -10  -6   1   11.90    1.60
  10  -6  -1    8.90    2.10
  10  -6  -1   11.70    2.20
  10   6  -1   11.70    2.10
  10   6  -1   11.00    2.10
  10   6  -1   12.20    2.20
 -10   6   1    8.80    1.90
   9  -6  -1    5.00    1.80
  -9  -6   1    6.50    1.30
   9  -6  -1    6.50    2.30
   9  -6  -1    4.80    1.80
  -9  -6   1    6.70    1.90
   9   6  -1    1.60    1.80
   9   6  -1    1.90    1.60
  -9   6   1    1.20    1.50
   9   6  -1    4.50    1.70
  -8  -6   1   79.79    4.90
  -8  -6   1   89.89    4.70
  -8  -6   1   83.89    5.30
   8  -6  -1   85.79    5.10
   8  -6  -1   85.59    5.20
  -8   6   1   88.09    5.00
   8   6  -1   85.09    5.10
   8   6  -1   86.69    5.00
   8   6  -1   82.89    5.10
   7  -6  -1   11.10    1.80
  -7  -6   1   10.90    1.80
  -7  -6   1   13.10    1.50
  -7  -6   1   12.90    1.70
   7  -6  -1   15.20    1.70
   7   6  -1   12.30    1.70
   7   6  -1    8.20    1.80
  -7   6   1   13.00    1.70
   7   6  -1   15.00    1.70
  -6  -6   1  130.39    6.60
   6  -6  -1  121.39    6.70
  -6  -6   1  132.29    6.90
   6  -6  -1  123.69    6.80
   6  -6  -1  125.29    6.80
  -6  -6   1  134.39    6.70
  -6  -6   1  122.29    6.70
   6  -6  -1  131.59    6.60
   6  -6  -1  125.79    6.50
  -6   6   1  122.59    6.80
   6   6  -1  125.99    6.70
  -6   6   1  128.69    6.70
   6   6  -1  127.09    6.70
   6   6  -1  129.39    6.70
  -5  -6   1    0.80    1.10
   5  -6  -1    0.00    1.30
  -5  -6   1    0.50    1.00
   5  -6  -1    0.50    0.90
   5  -6  -1    1.40    1.10
   5  -6  -1    1.40    0.80
  -5  -6   1   -0.30    1.00
   5  -6  -1    1.00    1.10
  -5  -6   1    2.50    1.10
   5   6  -1   -1.80    1.20
   5   6  -1    0.10    1.00
   5   6  -1    0.20    1.10
  -5   6   1    1.10    1.10
   5   6  -1   -0.40    0.80
  -5   6   1    0.30    1.00
   4  -6  -1   36.40    2.20
   4  -6  -1   34.50    2.20
   4  -6  -1   37.30    2.40
   4  -6  -1   35.70    2.90
  -4  -6   1   33.20    2.50
   4  -6  -1   32.60    2.70
  -4  -6   1   39.10    2.50
  -4  -6   1   34.00    2.50
   4  -6  -1   31.80    2.90
  -4  -6   1   38.60    2.50
   4   6  -1   37.50    2.50
   4   6  -1   32.90    2.40
  -4   6   1   33.60    2.70
   4   6  -1   36.90    2.70
  -4   6   1   32.10    2.60
   4   6  -1   35.30    2.60
  -3  -6   1    7.50    1.10
   3  -6  -1    5.80    0.90
   3  -6  -1    6.80    0.90
  -3  -6   1    6.60    1.00
  -3  -6   1    7.20    1.20
  -3  -6   1    7.20    1.10
   3  -6  -1    9.40    1.60
   3  -6  -1    6.40    1.30
   3  -6  -1    6.70    0.80
   3   6  -1    9.70    1.40
   3   6  -1    7.10    1.20
   3   6  -1    5.00    1.10
  -3   6   1    6.20    1.00
  -3   6   1    7.70    1.40
  -2  -6   1    1.90    1.00
   2  -6  -1    1.60    1.10
   2  -6  -1    1.00    0.70
  -2  -6   1    1.80    0.80
   2  -6  -1    1.90    0.70
   2  -6  -1    0.70    1.00
  -2  -6   1    0.50    1.20
  -2  -6   1    1.10    0.80
  -2   6   1    0.80    0.70
   2   6  -1    1.10    1.20
   2   6  -1    1.70    0.80
  -2   6   1    3.20    1.20
   2   6  -1    1.30    0.80
  -2   6   1    1.70    0.70
   2   6  -1    1.40    0.90
   1  -6  -1    0.40    1.00
   1  -6  -1    0.00    0.60
  -1  -6   1    0.60    0.70
  -1  -6   1   -0.70    0.90
   1  -6  -1   -0.60    0.90
   1  -6  -1    0.90    0.60
  -1  -6   1    0.60    1.10
  -1  -6   1    0.80    0.70
  -1   6   1    0.20    0.60
  -1   6   1    0.30    0.70
   1   6  -1    2.50    0.80
  -1   6   1    0.40    0.90
   1   6  -1    0.80    1.00
   1   6  -1   -0.60    0.70
   1   6  -1    1.30    1.10
   0  -6  -1   98.19    4.70
   0  -6   1   90.09    5.00
   0  -6   1   92.69    4.70
   0  -6  -1   89.39    5.00
   0  -6  -1   92.99    4.70
   0  -6   1   93.69    4.80
   0  -6  -1   90.89    5.00
   0  -6   1   92.49    5.00
   0   6  -1   93.19    4.70
   0   6   1   88.99    5.10
   0   6  -1   93.49    5.00
   0   6   1   93.39    4.70
   0   6  -1   97.89    5.10
   0   6  -1   91.09    4.80
   0   6   1   89.19    5.00
   0   6   1   95.09    4.70
   1  -6   1   48.10    3.10
  -1  -6  -1   49.99    2.80
   1  -6   1   50.99    3.20
  -1  -6  -1   46.00    3.10
  -1  -6  -1   49.20    2.70
   1  -6   1   46.60    2.60
  -1  -6  -1   53.79    3.20
   1  -6   1   49.50    2.80
  -1   6  -1   49.20    2.80
   1   6   1   45.10    3.20
   1   6   1   52.89    2.80
  -1   6  -1   45.90    3.10
   1   6   1   46.60    3.10
   1   6   1   51.09    2.80
  -2  -6  -1   33.80    2.10
   2  -6   1   37.90    2.80
  -2  -6  -1   32.90    2.50
   2  -6   1   34.60    2.00
  -2  -6  -1   37.00    2.30
   2  -6   1   35.50    2.60
  -2  -6  -1   36.50    2.70
   2  -6   1   34.80    2.30
   2   6   1   33.20    2.50
  -2   6  -1   35.20    2.60
   2   6   1   33.60    2.70
   2   6   1   35.40    2.30
  -2   6  -1   38.70    2.80
   2   6   1   34.90    2.20
  -2   6  -1   34.30    2.30
  -3  -6  -1   41.30    2.80
   3  -6   1   32.00    2.60
  -3  -6  -1   37.10    2.70
   3  -6   1   37.70    2.90
   3  -6   1   40.20    2.20
   3  -6   1   39.10    2.80
   3  -6   1   39.70    2.50
  -3  -6  -1   42.60    2.50
   3   6   1   39.00    2.80
  -3   6  -1   37.60    2.50
  -3   6  -1   42.40    2.80
   3   6   1   39.30    2.50
   3   6   1   40.10    2.70
   3   6   1   38.30    2.80
  -4  -6  -1   12.60    1.30
   4  -6   1   15.70    1.90
   4  -6   1   13.60    1.40
  -4  -6  -1   13.00    1.60
  -4  -6  -1   13.80    1.40
   4  -6   1   14.00    1.60
  -4  -6  -1   16.60    1.60
   4  -6   1   12.90    1.30
   4  -6   1   15.10    1.30
   4   6   1   13.90    1.50
  -4   6  -1   14.60    1.70
  -4   6  -1   13.90    1.40
   4   6   1   17.00    1.50
   4   6   1   16.60    1.60
   4   6   1   12.30    1.50
   5  -6   1    1.70    1.40
  -5  -6  -1    1.60    1.00
  -5  -6  -1    1.50    1.10
   5  -6   1    0.60    0.90
  -5  -6  -1    1.60    1.20
   5  -6   1    1.40    1.20
   5  -6   1    2.20    0.80
  -5  -6  -1    1.60    1.00
   5  -6   1    0.10    1.20
  -5   6  -1    2.20    1.10
   5   6   1    0.10    1.20
  -5   6  -1    1.00    1.00
   5   6   1    2.50    1.00
   5   6   1    1.60    1.20
   5   6   1    2.90    1.20
   6  -6   1    3.40    1.40
  -6  -6  -1    3.90    1.40
  -6  -6  -1    4.40    1.10
   6  -6   1    4.40    0.90
  -6  -6  -1    6.20    1.30
   6  -6   1    4.60    1.10
  -6  -6  -1    2.20    1.30
   6  -6   1    3.90    1.40
   6  -6   1    4.90    1.50
   6   6   1    2.60    1.30
   6   6   1    2.20    1.30
  -6   6  -1    3.70    1.20
   6   6   1    4.40    1.20
  -7  -6  -1    3.10    1.10
   7  -6   1   -2.00    1.50
   7  -6   1    3.50    1.50
  -7  -6  -1    3.70    1.70
  -7  -6  -1    2.10    1.60
   7  -6   1    2.30    1.30
   7   6   1    3.30    1.50
   7   6   1    1.20    1.30
  -7   6  -1    1.00    1.30
   7   6   1    2.40    1.30
   8  -6   1   35.00    2.90
  -8  -6  -1   25.80    2.30
   8  -6   1   26.20    2.50
  -8  -6  -1   25.10    2.70
   8   6   1   26.80    2.80
  -8   6  -1   28.50    2.90
   8   6   1   32.20    3.00
   8   6   1   25.90    2.50
  -9  -6  -1    6.40    1.50
  -9  -6  -1    4.30    2.10
   9  -6   1    7.80    1.80
   9  -6   1    9.00    1.90
   9  -6   1    3.80    2.00
   9   6   1    5.20    1.60
   9   6   1    3.90    1.80
   9   6   1    9.20    1.80
  -9   6  -1    3.10    1.60
  10  -6   1    4.30    1.90
  10  -6   1    0.70    1.80
 -10  -6  -1    2.70    2.20
  10   6   1    6.00    1.90
 -10   6  -1    0.00    1.70
  10   6   1    4.90    1.80
  10   6   1    1.10    1.80
 -11  -6  -1    9.50    1.70
  11  -6   1   11.90    2.30
 -11  -6  -1   11.50    2.70
  11  -6   1    8.00    2.20
 -11   6  -1   13.60    2.40
  11   6   1   15.80    2.50
  11   6   1   10.40    2.30
  12  -6   1   11.20    2.60
 -12  -6  -1    8.50    3.10
 -12  -6  -1   13.60    1.70
  12  -6   1   15.30    2.60
  12   6   1   15.80    2.70
  12   6   1   15.80    2.70
  13  -6   1   -0.20    2.60
  13  -6   1    4.60    2.60
 -13  -6  -1   -2.30    3.40
  13   6   1    7.60    4.90
  13   6   1    2.90    2.70
  14  -6   1    4.20    2.90
 -14  -6  -1    5.30    3.90
  14  -6   1   -1.70    2.80
  14   6   1    2.00    3.10
  14   6   1   -1.00    3.00
 -15  -6  -1    4.70    4.30
  15  -6   1    5.80    3.20
  15   6   1    5.10    3.40
  15   6   1    8.50    3.60
 -15  -7   1    1.70    4.60
  15  -7  -1    9.20    3.70
  15  -7  -1    8.60    4.20
  15   7  -1   11.40    3.80
  15   7  -1   12.90    3.80
  14  -7  -1   10.30    3.50
  14  -7  -1    9.30    3.30
 -14  -7   1   12.70    4.10
  14   7  -1    5.70    3.30
  14   7  -1    8.10    3.30
  13  -7  -1    2.90    3.10
 -13  -7   1    3.20    3.50
  13  -7  -1    5.60    3.00
  13   7  -1    4.20    3.00
  13   7  -1    1.70    2.70
  12  -7  -1   11.00    2.80
 -12  -7   1    9.40    2.00
  12  -7  -1    7.90    2.70
  12   7  -1    4.20    2.50
  12   7  -1    8.70    2.60
 -11  -7   1   19.00    2.20
  11  -7  -1   21.30    2.80
 -11  -7   1   21.20    3.30
  11  -7  -1   22.80    3.00
  11   7  -1   21.70    2.80
  11   7  -1   25.30    2.80
  10  -7  -1    5.30    2.00
 -10  -7   1    7.30    2.30
 -10  -7   1    4.70    1.50
  10  -7  -1   -3.00    2.00
 -10   7   1    3.00    1.90
  10   7  -1    6.40    2.50
  10   7  -1    3.70    2.00
  10   7  -1    4.00    2.10
   9  -7  -1    0.60    1.90
   9  -7  -1    2.00    1.40
  -9  -7   1   -3.60    1.80
  -9  -7   1   -3.90    1.30
   9  -7  -1    1.20    2.10
  -9   7   1    1.60    1.60
   9   7  -1    0.50    1.50
   9   7  -1    0.50    2.20
   9   7  -1    4.20    1.90
  -8  -7   1    2.70    1.30
  -8  -7   1    2.30    1.80
   8  -7  -1    2.20    1.80
   8  -7  -1    3.00    1.80
   8  -7  -1    1.70    1.30
   8   7  -1    1.50    1.60
   8   7  -1    4.30    2.00
  -8   7   1    2.80    1.40
   8   7  -1    2.30    1.60
  -7  -7   1    8.40    1.50
   7  -7  -1    7.20    1.30
   7  -7  -1    8.30    1.70
   7  -7  -1    9.30    1.80
  -7  -7   1    9.20    1.80
   7   7  -1    5.40    1.50
  -7   7   1    8.40    1.50
   7   7  -1   11.30    1.90
   7   7  -1    6.20    2.00
  -6  -7   1   11.50    1.60
   6  -7  -1   16.40    1.80
   6  -7  -1   15.00    1.50
  -6  -7   1   13.10    1.70
   6  -7  -1   13.30    1.70
  -6  -7   1   13.10    1.90
   6  -7  -1   15.60    2.00
   6   7  -1   14.00    1.60
   6   7  -1   17.00    2.00
  -6   7   1   11.40    1.70
  -6   7   1   12.10    1.60
   6   7  -1   12.30    2.00
  -5  -7   1    9.70    1.50
  -5  -7   1    9.70    1.40
   5  -7  -1   12.20    1.40
   5  -7  -1   14.40    1.50
  -5  -7   1   10.80    1.60
  -5  -7   1   11.30    1.70
   5  -7  -1   13.30    1.30
   5  -7  -1   12.60    1.80
  -5   7   1   11.40    1.40
   5   7  -1    9.80    1.40
   5   7  -1   11.60    1.80
   5   7  -1   13.10    1.80
   5   7  -1   12.60    1.70
  -5   7   1   12.20    1.80
  -4  -7   1   96.19    5.00
  -4  -7   1   91.69    5.00
  -4  -7   1   83.79    4.90
   4  -7  -1   83.39    5.10
  -4  -7   1   93.39    5.10
   4  -7  -1   89.39    4.80
   4  -7  -1   93.19    4.60
   4  -7  -1   93.59    4.70
   4   7  -1   88.29    5.00
   4   7  -1   85.69    4.80
  -4   7   1   85.19    5.10
   4   7  -1   90.69    5.20
  -4   7   1   90.29    4.80
   4   7  -1   89.69    4.90
  -3  -7   1    4.80    1.10
   3  -7  -1    5.60    0.90
   3  -7  -1    5.10    1.30
   3  -7  -1    6.00    1.10
  -3  -7   1    5.30    1.40
  -3  -7   1    6.00    1.10
  -3  -7   1    4.30    1.20
   3   7  -1    4.70    1.20
  -3   7   1    5.60    1.40
   3   7  -1    4.20    1.30
  -3   7   1    3.90    1.00
   3   7  -1    6.00    1.50
   3   7  -1    6.10    1.10
   2  -7  -1  241.88   11.80
   2  -7  -1  231.88   12.20
   2  -7  -1  250.17   11.90
  -2  -7   1  254.47   12.00
   2  -7  -1  236.28   12.20
  -2  -7   1  250.77   12.20
  -2  -7   1  245.08   12.00
  -2  -7   1  226.38   12.10
   2   7  -1  244.08   12.20
   2   7  -1  258.57   12.00
  -2   7   1  249.58   11.80
  -2   7   1  239.38   12.20
  -2   7   1  249.68   11.90
   2   7  -1  242.98   12.20
  -1  -7   1    7.30    1.50
   1  -7  -1    6.80    0.90
  -1  -7   1    6.80    1.10
   1  -7  -1    7.00    0.90
   1  -7  -1    5.70    1.40
  -1  -7   1    9.80    1.00
   1  -7  -1    6.40    1.30
  -1  -7   1    7.00    1.30
  -1   7   1    7.60    1.00
  -1   7   1    4.50    1.20
  -1   7   1    6.00    0.90
   1   7  -1    9.20    1.40
   1   7  -1    6.20    1.10
   1   7  -1    9.20    1.00
   1   7  -1    6.90    1.50
   0  -7  -1   54.69    3.60
   0  -7   1   53.89    3.40
   0  -7   1   57.69    3.10
   0  -7   1   50.89    3.40
   0  -7  -1   54.79    3.00
   0  -7  -1   57.49    3.00
   0  -7  -1   54.59    3.50
   0  -7   1   54.09    3.00
   0   7  -1   58.39    3.70
   0   7  -1   52.09    3.20
   0   7   1   55.19    3.10
   0   7  -1   53.79    3.00
   0   7   1   52.89    3.10
   0   7  -1   51.59    3.40
   0   7   1   53.49    3.50
   1  -7   1   16.10    1.90
  -1  -7  -1   16.10    1.40
   1  -7   1   16.10    1.60
  -1  -7  -1   14.30    1.80
   1  -7   1   13.60    1.30
   1  -7   1   14.90    1.70
  -1  -7  -1   15.60    1.50
  -1  -7  -1   13.50    1.60
  -1   7  -1   15.40    1.40
  -1   7  -1   16.60    1.70
   1   7   1   17.20    1.70
   1   7   1   15.00    1.80
  -1   7  -1   13.60    1.90
   1   7   1   16.30    1.40
   1   7   1   13.60    1.30
  -1   7  -1   12.10    1.30
   2  -7   1   61.69    3.20
  -2  -7  -1   68.89    4.00
   2  -7   1   62.79    3.50
   2  -7   1   60.09    4.00
   2  -7   1   63.39    3.90
  -2  -7  -1   65.19    3.50
  -2  -7  -1   59.69    3.80
   2   7   1   66.89    3.60
   2   7   1   63.19    3.50
  -2   7  -1   55.39    3.80
   2   7   1   60.89    4.00
   2   7   1   61.19    3.70
  -3  -7  -1   20.40    1.70
   3  -7   1   17.00    1.40
  -3  -7  -1   18.40    1.80
  -3  -7  -1   20.40    1.80
   3  -7   1   18.30    2.00
   3  -7   1   18.30    1.40
   3  -7   1   20.30    1.70
  -3  -7  -1   19.20    2.00
  -3   7  -1   17.80    1.80
  -3   7  -1   21.50    2.10
   3   7   1   15.00    1.80
   3   7   1   19.50    2.10
   3   7   1   21.60    2.10
   4  -7   1   12.00    1.70
  -4  -7  -1   15.40    1.60
  -4  -7  -1   13.30    1.80
   4  -7   1   13.10    1.20
  -4  -7  -1   11.70    1.50
   4  -7   1   12.80    1.40
   4  -7   1   12.30    1.30
  -4  -7  -1   11.10    1.40
   4   7   1   12.10    1.60
   4   7   1   11.90    1.80
   4   7   1   13.90    1.70
   4   7   1   12.20    1.40
  -4   7  -1   10.90    1.70
  -4   7  -1   10.70    1.40
  -5  -7  -1    9.60    1.50
   5  -7   1   11.30    1.70
  -5  -7  -1   12.00    1.70
   5  -7   1   13.80    1.50
   5  -7   1   14.80    1.40
   5  -7   1   15.10    1.80
  -5  -7  -1   12.70    1.50
   5   7   1   11.30    1.90
  -5   7  -1   13.80    1.90
   5   7   1   13.70    1.50
   5   7   1   17.30    1.90
  -5   7  -1   15.40    1.60
   6  -7   1  256.37   13.10
   6  -7   1  265.47   12.80
  -6  -7  -1  264.67   13.20
  -6  -7  -1  266.37   13.00
   6  -7   1  260.87   12.70
   6   7   1  270.77   13.10
   6   7   1  253.67   12.90
  -6   7  -1  257.07   13.20
  -6   7  -1  260.67   13.00
   6   7   1  264.97   13.10
   7  -7   1   -0.40    1.40
   7  -7   1    0.30    1.50
   7  -7   1    0.70    1.30
  -7  -7  -1    0.30    1.20
  -7  -7  -1    0.20    1.50
   7   7   1    0.70    1.50
   7   7   1   -0.20    1.80
  -7   7  -1   -1.40    1.30
   7   7   1    0.60    1.30
   8  -7   1    1.20    1.20
  -8  -7  -1    1.20    1.30
  -8  -7  -1   -0.70    1.70
   8  -7   1   -2.30    1.60
   8  -7   1    1.70    1.80
   8   7   1    1.90    1.80
  -8   7  -1    0.50    1.50
   8   7   1   -0.20    1.70
   8   7   1    0.30    1.40
   9  -7   1    4.20    2.00
  -9  -7  -1   -0.80    2.10
  -9  -7  -1    2.00    1.40
   9  -7   1    2.60    1.80
   9  -7   1    3.60    1.90
   9   7   1    0.40    1.60
   9   7   1    3.40    2.10
   9   7   1    4.20    1.90
  -9   7  -1    0.70    1.70
  10  -7   1    2.40    2.10
  10  -7   1    3.00    2.30
 -10  -7  -1   -1.20    2.30
 -10  -7  -1    0.90    1.30
 -10   7  -1    1.30    1.90
  10   7   1   -1.90    1.80
  10   7   1    3.30    2.20
  10   7   1    3.10    2.10
  11  -7   1    3.00    2.30
 -11  -7  -1    0.20    1.60
  11  -7   1    1.30    2.30
 -11  -7  -1    1.70    2.60
 -11   7  -1    2.20    2.20
  11   7   1    2.20    2.00
  11   7   1    5.20    2.30
 -12  -7  -1   -0.30    1.70
  12  -7   1    1.60    2.60
 -12  -7  -1    0.10    3.70
  12  -7   1    1.70    2.50
  12   7   1    3.10    2.30
  12   7   1    1.20    2.50
  13  -7   1   -2.90    2.80
  13  -7   1    5.00    3.00
 -13  -7  -1    2.60    3.50
  13   7   1   -1.70    2.70
  13   7   1   -2.10    2.90
 -14  -7  -1    8.40    4.40
  14  -7   1    7.50    3.50
  14  -7   1    6.70    3.30
  14   7   1    7.70    3.40
  14   7   1   16.10    3.60
 -15  -7  -1    5.50    4.70
  15   7   1   -2.80    3.70
  15   7   1    4.90    4.10
  14  -8  -1    1.30    3.80
  14  -8  -1    4.20    3.00
  14  -8  -1    2.40    3.30
 -14  -8   1    3.20    4.40
  14   8  -1   18.60    3.90
  14   8  -1    6.90    3.60
  13  -8  -1    7.10    3.10
  13  -8  -1    5.70    3.40
 -13  -8   1    7.60    3.80
  13  -8  -1    6.20    2.70
  13   8  -1   -0.50    2.90
  13   8  -1    7.50    3.30
  12  -8  -1    3.30    4.50
  12  -8  -1   -4.30    2.80
 -12  -8   1   -1.80    2.00
  12  -8  -1   -2.00    2.10
 -12  -8   1   -1.20    3.30
  12   8  -1    1.10    2.70
  11  -8  -1    1.70    2.60
 -11  -8   1   -2.10    1.70
  11  -8  -1   -0.30    2.00
 -11  -8   1    3.10    2.90
  11  -8  -1    2.40    2.50
  11   8  -1    1.10    2.20
  11   8  -1    4.70    2.50
 -11   8   1   -3.80    2.10
 -10  -8   1    4.30    2.60
  10  -8  -1    8.20    2.50
  10  -8  -1    6.80    1.90
 -10  -8   1    9.00    1.80
  10  -8  -1    8.60    2.40
 -10   8   1    8.30    2.30
  10   8  -1    6.50    2.50
  10   8  -1    5.20    2.20
   9  -8  -1    1.80    2.10
  -9  -8   1   -2.20    1.40
  -9  -8   1    3.60    2.20
   9  -8  -1    3.40    2.30
   9  -8  -1    1.60    1.50
  -9   8   1    1.00    1.80
   9   8  -1   -2.10    2.00
   9   8  -1   -0.70    1.70
  -8  -8   1    5.40    2.00
   8  -8  -1    8.10    2.00
  -8  -8   1    4.20    1.50
   8  -8  -1    3.00    2.10
   8  -8  -1    7.20    1.40
   8   8  -1    4.90    1.60
  -8   8   1    5.70    1.70
   8   8  -1    4.90    2.00
  -7  -8   1    0.50    1.70
   7  -8  -1    1.00    1.70
  -7  -8   1   -0.10    1.30
   7  -8  -1   -0.50    1.60
   7  -8  -1    1.20    1.20
  -7   8   1    0.20    1.80
  -7   8   1    0.50    1.40
   7   8  -1    2.70    1.50
   7   8  -1    1.90    1.70
   6  -8  -1   22.00    2.00
  -6  -8   1   21.30    2.10
  -6  -8   1   23.10    2.30
   6  -8  -1   21.40    2.40
   6  -8  -1   19.80    2.00
   6   8  -1   21.30    2.30
  -6   8   1   17.50    2.00
   6   8  -1   18.40    2.00
  -6   8   1   23.30    2.60
   5  -8  -1  190.88    9.50
   5  -8  -1  189.38    9.40
   5  -8  -1  189.28    9.90
   5  -8  -1  178.58    9.60
  -5  -8   1  195.88    9.80
  -5  -8   1  187.18    9.70
  -5   8   1  194.28   10.00
  -5   8   1  192.48    9.60
   5   8  -1  193.68    9.60
   5   8  -1  192.78    9.90
   4  -8  -1   82.39    4.40
  -4  -8   1   84.09    4.90
   4  -8  -1   84.19    4.50
   4  -8  -1   86.49    4.70
   4  -8  -1   86.69    5.10
  -4  -8   1   83.09    4.90
  -4  -8   1   82.49    4.80
   4   8  -1   83.69    4.90
  -4   8   1   81.99    5.10
   4   8  -1   90.89    4.70
   4   8  -1   80.29    5.00
  -4   8   1   84.79    4.70
  -3  -8   1   31.30    2.60
   3  -8  -1   32.10    2.90
   3  -8  -1   30.50    2.10
   3  -8  -1   31.90    2.40
  -3  -8   1   35.70    2.80
  -3  -8   1   30.30    2.50
   3   8  -1   28.80    2.40
  -3   8   1   33.40    3.00
  -3   8   1   31.90    2.40
   3   8  -1   33.60    2.60
   3   8  -1   28.80    2.80
   2  -8  -1   22.40    1.80
  -2  -8   1   27.10    2.30
  -2  -8   1   26.20    2.50
   2  -8  -1   22.80    2.10
   2  -8  -1   25.60    2.30
   2   8  -1   29.40    2.20
  -2   8   1   25.10    1.90
  -2   8   1   25.40    2.60
   2   8  -1   25.30    2.20
   2   8  -1   23.30    2.60
  -1  -8   1    3.60    1.00
  -1  -8   1    1.20    0.80
   1  -8  -1    1.40    1.30
  -1  -8   1    4.30    1.30
   1  -8  -1    2.40    0.90
   1  -8  -1    2.40    0.90
  -1   8   1    0.80    1.00
   1   8  -1    1.20    1.00
   1   8  -1    3.10    1.00
  -1   8   1    3.60    1.30
   1   8  -1    1.50    1.40
  -1   8   1    2.40    0.90
   0  -8  -1    6.30    1.10
   0  -8  -1    6.80    1.60
   0  -8   1    3.90    1.40
   0  -8  -1    8.20    1.10
   0  -8   1    4.30    1.20
   0  -8   1    7.40    1.00
   0   8   1    6.20    1.10
   0   8   1    6.80    1.10
   0   8  -1    5.60    1.10
   0   8   1    7.80    1.50
   0   8  -1    8.60    1.10
   0   8  -1    6.50    1.50
  -1  -8  -1   23.00    2.30
  -1  -8  -1   27.20    2.70
   1  -8   1   27.10    1.80
   1  -8   1   24.60    2.10
  -1  -8  -1   25.10    2.10
   1  -8   1   27.70    2.70
  -1   8  -1   28.60    2.10
   1   8   1   26.70    2.40
  -1   8  -1   25.90    1.70
   1   8   1   23.30    2.50
  -1   8  -1   22.80    2.50
   1   8   1   24.50    2.10
   2  -8   1    3.80    1.00
  -2  -8  -1    5.00    1.40
   2  -8   1    7.20    1.60
   2  -8   1    6.70    0.90
  -2  -8  -1    5.30    1.20
  -2  -8  -1    4.90    1.10
   2   8   1    5.80    1.20
  -2   8  -1    4.50    1.10
   2   8   1    5.40    1.10
   2   8   1    3.80    1.30
  -2   8  -1    4.70    1.50
  -3  -8  -1  254.07   12.20
   3  -8   1  252.47   12.00
   3  -8   1  243.88   12.50
   3  -8   1  255.17   11.90
  -3  -8  -1  245.38   12.40
  -3  -8  -1  243.68   12.30
   3  -8   1  244.78   12.20
   3   8   1  242.48   12.20
  -3   8  -1  243.68   12.20
  -3   8  -1  248.48   12.50
   3   8   1  254.37   12.30
   3   8   1  241.18   12.40
   4  -8   1    0.80    0.80
   4  -8   1    2.10    0.90
  -4  -8  -1    0.60    1.30
  -4  -8  -1    1.40    1.20
   4  -8   1    2.30    1.50
   4  -8   1    1.90    1.20
  -4  -8  -1    1.10    1.30
  -4   8  -1    1.00    1.00
   4   8   1    1.40    1.60
   4   8   1    1.50    1.10
  -4   8  -1    0.80    1.50
   4   8   1    0.30    1.40
   5  -8   1  105.89    6.10
   5  -8   1  104.39    5.40
  -5  -8  -1  107.29    5.80
   5  -8   1  108.39    5.40
  -5  -8  -1  105.59    5.90
  -5  -8  -1  103.39    5.80
   5   8   1  102.79    5.70
  -5   8  -1  100.09    6.00
   5   8   1  103.49    6.00
  -5   8  -1  111.79    5.80
   6  -8   1   18.20    1.70
  -6  -8  -1   19.60    2.00
   6  -8   1   17.20    2.30
   6  -8   1   18.40    1.50
  -6  -8  -1   15.40    2.10
  -6   8  -1   16.80    1.90
   6   8   1   19.60    2.30
   6   8   1   16.50    1.90
  -6   8  -1   12.10    2.00
   7  -8   1   13.60    2.20
   7  -8   1   18.00    1.90
  -7  -8  -1   16.60    2.30
  -7  -8  -1   16.30    1.90
   7  -8   1   13.90    1.60
  -7   8  -1   13.60    2.00
   7   8   1   16.60    2.30
   7   8   1   16.00    1.90
  -8  -8  -1   35.90    3.30
  -8  -8  -1   30.30    3.00
   8  -8   1   32.40    2.70
   8  -8   1   33.80    3.20
   8  -8   1   37.40    3.80
  -8   8  -1   36.80    3.40
   8   8   1   35.10    3.70
   8   8   1   30.40    3.10
  -9  -8  -1    0.50    2.20
   9  -8   1   -1.40    1.40
   9  -8   1   -1.00    2.00
   9  -8   1    3.10    2.20
  -9  -8  -1    1.70    1.50
  -9   8  -1    1.00    1.80
   9   8   1    2.00    1.70
   9   8   1    0.40    2.10
  10  -8   1   -0.60    2.10
 -10  -8  -1    3.20    2.50
  10  -8   1   -4.50    2.20
  10  -8   1    1.30    1.70
 -10  -8  -1   -0.20    1.60
  10   8   1    5.40    2.30
  10   8   1   -2.60    1.90
 -10   8  -1    5.80    2.10
  11  -8   1    6.30    2.60
  11  -8   1    2.10    2.60
 -11  -8  -1    4.00    1.90
  11  -8   1    4.50    2.00
 -11  -8  -1    1.70    2.90
  11   8   1    3.40    2.20
  11   8   1   10.10    2.80
 -11   8  -1    5.80    2.40
 -12  -8  -1   -2.80    3.30
 -12  -8  -1    0.40    2.40
  12  -8   1    1.80    2.80
  12  -8   1    1.00    2.80
  12  -8   1   -1.30    2.10
 -12   8  -1    4.50    2.80
  12   8   1    0.00    2.60
  12   8   1    1.90    2.90
  13  -8   1   23.40    3.80
  13  -8   1   24.00    3.90
  13  -8   1   19.90    3.00
 -13  -8  -1   29.30    4.70
  13   8   1   22.60    3.50
  13   8   1   34.40    4.00
  14  -8   1    0.90    3.50
  14  -8   1    5.80    3.50
  14  -8   1    7.10    2.80
 -14  -8  -1    1.60    4.50
  14   8   1    8.10    3.40
  14   8   1    9.20    3.90
 -13  -9   1   19.40    4.40
  13  -9  -1   11.70    4.00
  13  -9  -1   12.20    3.60
  13  -9  -1   15.00    2.90
  13   9  -1   20.50    3.90
  13   9  -1   14.20    3.60
  12  -9  -1   13.30    3.50
 -12  -9   1    8.80    3.60
 -12  -9   1    3.90    2.40
  12  -9  -1    7.80    2.40
  12  -9  -1    2.50    3.10
  12   9  -1   10.50    3.20
  12   9  -1    5.10    2.90
  11  -9  -1   26.00    3.50
  11  -9  -1   19.80    2.50
 -11  -9   1   26.30    4.90
 -11  -9   1   19.60    2.60
  11   9  -1   20.50    3.40
  11   9  -1   20.50    3.00
 -11   9   1   24.40    3.20
 -10  -9   1   -1.50    1.80
 -10  -9   1   -1.00    2.60
  10  -9  -1    0.70    1.70
  10  -9  -1    3.70    2.70
  10   9  -1    4.10    2.60
 -10   9   1   -0.80    2.00
  10   9  -1    2.90    2.10
   9  -9  -1    1.70    1.60
  -9  -9   1   -3.30    1.70
  -9  -9   1    1.50    2.20
   9  -9  -1    1.50    2.30
   9   9  -1   -0.50    1.80
  -9   9   1    3.50    1.90
   9   9  -1   -2.10    2.20
   8  -9  -1    3.70    2.10
  -8  -9   1   -2.90    1.60
  -8  -9   1    0.20    1.90
   8  -9  -1    2.90    2.00
   8  -9  -1   -1.70    1.30
  -8   9   1    0.10    1.70
   8   9  -1    2.90    1.70
   8   9  -1    0.60    2.30
   7  -9  -1   16.20    1.80
  -7  -9   1   18.80    2.20
   7  -9  -1   13.70    2.20
   7  -9  -1   14.10    2.50
  -7  -9   1   13.00    2.30
  -7   9   1   13.20    2.00
  -7   9   1   18.20    2.70
   7   9  -1   19.00    2.50
   7   9  -1   16.30    2.10
  -6  -9   1    3.70    1.60
  -6  -9   1    6.40    1.80
   6  -9  -1    6.60    1.70
   6  -9  -1    6.90    2.00
   6   9  -1    3.40    1.50
  -6   9   1    8.80    1.60
   6   9  -1    8.20    2.00
  -6   9   1    4.10    2.00
   5  -9  -1   21.10    2.50
  -5  -9   1   21.70    2.20
  -5  -9   1   22.60    2.30
   5  -9  -1   20.50    1.90
   5  -9  -1   20.40    2.00
   5   9  -1   19.80    1.90
  -5   9   1   15.20    2.20
   5   9  -1   19.90    2.40
  -5   9   1   19.70    2.00
  -4  -9   1   39.20    3.10
   4  -9  -1   39.40    3.60
   4  -9  -1   37.70    2.70
   4  -9  -1   36.40    2.50
   4  -9  -1   38.40    3.10
  -4  -9   1   39.10    3.30
   4   9  -1   40.40    3.50
  -4   9   1   34.60    3.60
   4   9  -1   42.50    3.00
  -4   9   1   42.50    2.90
   3  -9  -1   68.29    3.70
  -3  -9   1   68.19    4.40
  -3  -9   1   67.39    4.30
   3  -9  -1   66.89    4.00
   3  -9  -1   66.49    4.60
  -3  -9   1   71.79    4.10
  -3   9   1   72.79    4.00
   3   9  -1   65.39    4.00
   3   9  -1   71.59    4.20
   3   9  -1   63.49    4.50
  -3   9   1   63.79    4.50
   2  -9  -1   16.00    1.40
   2  -9  -1   12.20    2.10
  -2  -9   1   14.40    1.90
  -2  -9   1   13.50    1.60
   2  -9  -1   14.80    1.60
  -2  -9   1   13.30    1.70
  -2   9   1   13.80    1.40
   2   9  -1   14.80    1.70
  -2   9   1   14.70    1.50
  -2   9   1   11.10    1.90
   2   9  -1   18.60    2.20
   2   9  -1   12.10    1.50
   1  -9  -1  177.08    8.70
   1  -9  -1  175.58    8.70
  -1  -9   1  171.18    9.10
  -1  -9   1  169.68    8.80
  -1  -9   1  178.88    8.80
   1  -9  -1  177.18    9.20
   1   9  -1  168.68    8.80
  -1   9   1  170.78    8.70
  -1   9   1  178.18    9.20
   1   9  -1  170.38    9.10
  -1   9   1  175.58    8.70
   1   9  -1  174.98    8.70
   0  -9  -1    0.20    1.50
   0  -9   1   -1.10    1.20
   0  -9   1   -0.40    1.40
   0  -9  -1    1.20    1.00
   0  -9   1   -1.30    0.80
   0   9  -1   -0.80    1.40
   0   9  -1   -0.70    1.00
   0   9   1   -0.70    1.20
   0   9   1    1.10    1.10
   0   9  -1   -1.50    1.10
   0   9   1   -1.80    1.00
  -1  -9  -1   16.10    2.10
   1  -9   1   17.10    2.10
   1  -9   1   17.90    1.70
   1  -9   1   18.30    1.70
  -1  -9  -1   19.50    1.80
  -1  -9  -1   20.20    2.10
  -1   9  -1   17.50    1.70
  -1   9  -1   13.80    2.10
  -1   9  -1   18.60    1.50
   1   9   1   17.90    1.70
   1   9   1   19.70    1.70
   1   9   1   17.70    2.30
   2  -9   1    0.50    1.60
   2  -9   1   -0.70    1.20
  -2  -9  -1    1.00    1.10
  -2  -9  -1    3.00    1.50
  -2  -9  -1   -1.30    1.20
   2  -9   1    0.60    0.80
   2   9   1   -0.50    1.00
  -2   9  -1   -0.30    1.60
  -2   9  -1   -1.50    1.00
   2   9   1   -1.00    1.60
   2   9   1    0.80    1.30
   3  -9   1  228.28   10.80
   3  -9   1  215.08   11.10
   3  -9   1  222.38   11.50
  -3  -9  -1  225.08   11.10
  -3  -9  -1  219.38   11.20
  -3  -9  -1  219.48   11.30
   3  -9   1  229.18   10.80
   3   9   1  223.18   11.20
   3   9   1  223.78   11.00
  -3   9  -1  216.58   11.50
   3   9   1  216.58   11.40
  -3   9  -1  226.18   11.10
   4  -9   1    8.70    1.10
   4  -9   1    7.90    1.20
  -4  -9  -1    4.20    1.60
   4  -9   1    7.60    2.00
  -4  -9  -1    9.40    1.90
  -4  -9  -1    5.10    1.60
   4   9   1    7.60    1.40
   4   9   1    2.80    1.60
  -4   9  -1    6.10    1.40
  -4   9  -1    8.10    1.80
  -5  -9  -1   69.79    4.30
   5  -9   1   67.99    3.80
   5  -9   1   68.69    3.60
   5  -9   1   67.39    4.80
  -5  -9  -1   64.29    4.40
  -5   9  -1   66.99    4.60
   5   9   1   67.59    4.50
   5   9   1   59.29    4.10
  -5   9  -1   63.59    4.10
   6  -9   1   14.90    2.40
  -6  -9  -1   12.60    2.20
   6  -9   1   12.70    1.60
  -6  -9  -1   13.20    2.00
   6  -9   1   15.60    1.40
   6   9   1   13.50    1.80
  -6   9  -1   13.40    2.10
  -6   9  -1   14.70    1.90
   6   9   1   14.90    2.30
  -7  -9  -1   83.29    5.20
   7  -9   1   84.89    4.70
   7  -9   1   90.99    5.80
   7  -9   1   80.79    4.90
  -7  -9  -1   92.09    5.70
   7   9   1   87.59    5.60
   7   9   1   82.69    5.20
  -7   9  -1   90.79    5.30
  -8  -9  -1    0.40    1.60
   8  -9   1    4.90    2.30
   8  -9   1    4.00    1.90
   8  -9   1   -0.80    1.30
  -8  -9  -1   -1.40    2.00
   8   9   1   -1.10    2.20
   8   9   1    0.00    1.60
  -8   9  -1    2.60    1.80
  -9  -9  -1    5.10    1.80
   9  -9   1   10.40    2.70
  -9  -9  -1   10.20    2.70
   9  -9   1    5.80    1.50
  -9   9  -1    7.70    2.20
   9   9   1    9.90    2.10
   9   9   1   10.40    2.60
  10  -9   1    2.80    1.70
 -10  -9  -1    1.00    1.90
 -10  -9  -1    2.80    2.60
  10  -9   1    0.40    2.60
  10  -9   1   -2.90    2.50
 -10   9  -1    2.30    2.20
  10   9   1    2.40    2.70
  10   9   1   -1.00    1.90
 -11  -9  -1    3.20    2.10
 -11  -9  -1    3.60    3.20
  11  -9   1    5.30    3.10
  11  -9   1    5.30    3.00
  11  -9   1    1.20    1.90
  11   9   1    9.70    3.10
 -11   9  -1    3.20    2.60
  11   9   1    3.80    2.50
 -12  -9  -1   -2.10    3.40
  12  -9   1   -1.60    3.20
  12  -9   1   -2.30    3.00
  12  -9   1   -2.90    2.10
  12   9   1    2.10    3.30
 -12   9  -1   10.00    3.10
  12   9   1    1.30    2.70
  13  -9   1   10.40    3.70
  13  -9   1    3.80    3.50
 -13  -9  -1    9.70    4.30
  13  -9   1    4.10    3.20
  13   9   1    2.40    3.10
  13   9   1    8.40    3.90
 -12 -10   1   10.10    4.10
  12 -10  -1   -1.40    5.30
  12 -10  -1   11.10    3.80
  12  10  -1    5.00    3.50
  12  10  -1    4.50    3.00
 -11 -10   1   37.10    3.50
 -11 -10   1   41.20    4.70
  11 -10  -1   41.40    4.50
  11 -10  -1   34.90    3.80
  11 -10  -1   44.90    4.50
 -11  10   1   41.60    4.10
  11  10  -1   49.50    4.60
  11  10  -1   35.00    4.90
 -10 -10   1    1.10    2.90
 -10 -10   1    1.00    2.20
  10 -10  -1   -1.30    1.80
  10 -10  -1    2.00    3.00
 -10  10   1    1.20    2.30
  10  10  -1    4.20    2.80
  10  10  -1    1.40    2.20
   9 -10  -1   -0.40    1.70
  -9 -10   1    2.50    2.60
   9 -10  -1    1.10    2.80
  -9 -10   1    2.70    1.90
   9  10  -1    1.20    2.70
  -9  10   1    1.00    2.10
   9  10  -1    3.50    2.00
   8 -10  -1   10.30    2.90
  -8 -10   1   12.60    2.30
  -8 -10   1   13.30    2.60
   8 -10  -1   11.50    1.80
  -8  10   1    8.60    2.10
   8  10  -1   13.80    2.10
   8  10  -1   11.10    2.60
  -7 -10   1   25.00    2.60
   7 -10  -1   23.40    3.10
  -7 -10   1   22.90    3.00
   7 -10  -1   23.60    2.10
   7  10  -1   26.20    3.00
  -7  10   1   20.80    3.20
   7  10  -1   23.90    2.50
  -7  10   1   25.50    2.50
   6 -10  -1   53.89    4.80
  -6 -10   1   58.99    4.30
   6 -10  -1   51.19    3.90
  -6 -10   1   54.29    4.30
  -6  10   1   55.19    4.70
   6  10  -1   59.39    4.00
   6  10  -1   63.79    4.60
  -6  10   1   54.09    4.00
   5 -10  -1   12.60    1.80
   5 -10  -1   13.50    2.50
  -5 -10   1    8.30    1.90
  -5 -10   1   10.60    2.00
   5 -10  -1   11.20    1.50
  -5  10   1    5.80    2.00
   5  10  -1   11.80    2.30
   5  10  -1   12.30    1.80
  -5  10   1   10.30    1.70
   4 -10  -1   91.09    5.60
   4 -10  -1   87.69    4.50
  -4 -10   1   83.09    5.30
  -4 -10   1   80.09    5.00
   4 -10  -1   80.19    4.70
   4  10  -1   78.49    5.40
   4  10  -1   82.59    4.90
  -4  10   1   78.19    5.40
  -4  10   1   88.39    4.90
   3 -10  -1   35.10    2.50
  -3 -10   1   35.40    3.00
  -3 -10   1   32.20    3.40
   3 -10  -1   35.30    3.70
   3 -10  -1   31.30    3.10
   3  10  -1   35.90    2.90
  -3  10   1   38.60    3.40
   3  10  -1   31.80    3.00
   3  10  -1   36.80    3.20
  -3  10   1   35.90    2.80
  -2 -10   1   74.79    4.40
   2 -10  -1   74.49    5.10
  -2 -10   1   75.89    5.00
   2 -10  -1   75.69    4.20
   2 -10  -1   72.79    4.40
   2  10  -1   73.59    4.90
   2  10  -1   69.09    4.30
   2  10  -1   74.99    4.40
  -2  10   1   75.49    4.30
  -2  10   1   76.79    5.00
  -1 -10   1  140.39    7.60
   1 -10  -1  144.39    7.50
  -1 -10   1  145.29    7.40
  -1 -10   1  142.09    8.00
   1 -10  -1  150.98    8.10
  -1  10   1  144.49    7.40
  -1  10   1  138.79    8.00
   1  10  -1  147.49    8.00
   1  10  -1  140.89    7.40
  -1  10   1  146.59    7.40
   1  10  -1  145.59    7.50
   0 -10  -1  222.88   11.30
   0 -10  -1  215.38   10.70
   0 -10   1  213.58   10.60
   0 -10  -1  218.58   10.80
   0 -10   1  217.18   11.20
   0 -10   1  205.88   10.80
   0  10  -1  212.68   11.20
   0  10  -1  214.98   10.80
   0  10   1  207.28   10.70
   0  10   1  215.78   11.20
   0  10   1  218.18   10.70
   0  10  -1  220.28   10.60
   1 -10   1   29.20    2.00
  -1 -10  -1   23.10    2.10
   1 -10   1   28.30    2.70
  -1 -10  -1   21.50    2.50
  -1 -10  -1   27.10    2.50
   1 -10   1   24.00    2.20
  -1  10  -1   24.50    2.10
  -1  10  -1   23.10    2.50
  -1  10  -1   23.10    2.80
   1  10   1   22.30    2.60
   1  10   1   29.50    2.40
   1  10   1   22.90    2.40
  -2 -10  -1   10.40    1.80
   2 -10   1    9.10    1.20
  -2 -10  -1    9.90    2.00
   2 -10   1    6.60    2.10
   2 -10   1    8.30    1.90
  -2 -10  -1    7.60    1.60
   2  10   1    7.50    1.60
   2  10   1    9.60    2.20
  -2  10  -1    7.30    2.00
   2  10   1   10.60    1.50
  -2  10  -1    8.80    1.40
  -3 -10  -1   -0.50    1.60
  -3 -10  -1   -0.50    1.60
   3 -10   1    0.80    0.90
   3 -10   1   -0.30    1.90
  -3 -10  -1   -1.10    1.40
   3 -10   1   -0.70    1.00
  -3  10  -1   -0.90    1.30
   3  10   1   -2.10    1.80
   3  10   1   -0.60    1.20
  -3  10  -1    1.30    1.70
  -4 -10  -1    7.30    1.90
   4 -10   1   10.10    2.30
  -4 -10  -1    8.50    1.90
   4 -10   1    7.30    1.30
   4 -10   1    7.60    1.10
   4  10   1    8.70    1.50
  -4  10  -1    3.60    2.00
   4  10   1    6.30    2.10
  -4  10  -1    8.40    1.60
  -5 -10  -1    3.50    1.90
   5 -10   1    3.10    1.30
   5 -10   1    1.60    2.10
   5 -10   1    3.60    1.00
  -5 -10  -1    1.70    1.60
  -5  10  -1    0.80    1.50
  -5  10  -1    2.50    1.90
   5  10   1    1.70    1.80
   5  10   1    2.30    1.50
  -6 -10  -1    1.70    1.80
   6 -10   1    0.00    2.20
  -6 -10  -1   -0.20    1.80
   6 -10   1   -0.50    1.10
   6 -10   1    0.40    1.40
   6  10   1    0.70    1.50
  -6  10  -1    0.30    1.50
   6  10   1    0.20    2.00
  -6  10  -1    1.00    1.90
  -7 -10  -1   -0.40    1.70
   7 -10   1   -0.30    1.20
   7 -10   1    2.00    2.40
  -7 -10  -1    2.00    2.10
   7  10   1    1.70    2.30
  -7  10  -1    1.30    1.70
   7  10   1   -0.60    1.60
   8 -10   1    1.80    2.60
  -8 -10  -1    5.40    2.50
  -8 -10  -1    3.20    2.00
   8  10   1    9.30    2.70
   8  10   1    2.80    1.80
  -8  10  -1    5.10    2.10
   9 -10   1    8.10    1.70
  -9 -10  -1   15.90    3.00
  -9 -10  -1    7.20    2.20
   9 -10   1    8.80    3.00
   9  10   1    8.90    2.20
  -9  10  -1   11.00    2.40
   9  10   1   12.20    3.00
  10 -10   1   24.30    3.60
  10 -10   1   16.80    2.20
 -10 -10  -1   19.60    2.70
  10  10   1   18.40    2.90
 -10  10  -1   18.10    3.10
  10  10   1   23.50    3.60
  11 -10   1   18.80    3.70
 -11 -10  -1   16.40    3.80
  11 -10   1   28.10    3.80
 -11 -10  -1   18.40    2.70
  11  10   1   19.80    3.90
  11  10   1   20.90    4.40
 -11  10  -1   17.80    3.50
  12 -10   1    3.50    5.20
  12 -10   1    6.30    3.50
 -12 -10  -1    9.30    4.30
  12  10   1    3.50    3.10
 -12  10  -1   11.40    3.40
  12  10   1   10.20    3.80
  12  11  -1   19.20    5.70
  11 -11  -1    8.00    3.30
 -11 -11   1   -2.70    3.60
  11 -11  -1   -1.50    3.80
 -11 -11   1   -2.20    2.50
  11  11  -1    1.10    3.90
  11  11  -1   -2.90    2.70
 -10 -11   1   19.50    3.00
 -10 -11   1   22.60    3.90
  10 -11  -1   12.80    4.00
  10  11  -1   14.30    3.20
  10  11  -1   27.00    4.00
 -10  11   1   20.00    3.10
  -9 -11   1    4.70    2.30
   9 -11  -1    0.50    1.80
   9 -11  -1    2.50    4.00
  -9 -11   1    3.10    2.90
   9  11  -1   -0.10    3.00
   9  11  -1   -0.80    2.10
  -9  11   1    3.90    2.40
  -8 -11   1    1.70    2.50
   8 -11  -1   -1.70    1.50
   8 -11  -1   -1.30    2.80
  -8 -11   1    4.30    2.20
  -8  11   1    3.40    2.10
   8  11  -1    1.10    2.00
   8  11  -1    5.00    2.70
  -7 -11   1    0.60    2.30
   7 -11  -1   -2.10    2.50
  -7 -11   1    0.10    2.00
   7 -11  -1    2.10    1.60
   7  11  -1   -0.30    2.00
   7  11  -1   -2.80    2.40
  -7  11   1    0.70    1.90
  -7  11   1   -0.80    2.70
   6 -11  -1    5.10    2.60
  -6 -11   1    4.20    2.10
  -6 -11   1    0.00    2.10
   6  11  -1    6.90    1.90
  -6  11   1   -2.50    2.30
   6  11  -1    4.10    2.40
  -6  11   1    1.20    1.70
   5 -11  -1    4.70    2.50
   5 -11  -1    3.80    1.30
  -5 -11   1    4.10    2.00
  -5 -11   1    0.70    1.80
  -5  11   1    0.60    2.20
  -5  11   1    1.50    1.60
   5  11  -1    4.20    2.30
   5  11  -1    0.30    1.60
   4 -11  -1   30.40    3.30
   4 -11  -1   24.70    2.40
  -4 -11   1   31.30    3.30
   4 -11  -1   32.90    2.50
  -4 -11   1   31.30    3.10
   4  11  -1   29.80    2.60
   4  11  -1   32.00    3.30
  -4  11   1   28.70    2.90
  -4  11   1   28.40    3.20
  -3 -11   1   -1.20    1.50
   3 -11  -1    0.70    1.30
   3 -11  -1    2.10    2.20
  -3 -11   1    1.10    1.70
   3 -11  -1    1.20    1.40
   3  11  -1    0.40    1.40
  -3  11   1   -0.10    1.40
   3  11  -1   -3.20    2.00
  -3  11   1    0.00    2.20
   2 -11  -1   18.00    2.70
  -2 -11   1   15.80    1.90
  -2 -11   1   17.00    2.40
   2 -11  -1   11.20    2.20
   2  11  -1   16.30    1.90
  -2  11   1   14.80    1.80
   2  11  -1   18.80    2.00
  -2  11   1   14.60    2.50
   2  11  -1   14.80    2.50
  -1 -11   1   25.50    2.20
   1 -11  -1   23.30    2.80
   1 -11  -1   23.50    2.30
  -1 -11   1   27.40    2.90
   1 -11  -1   26.10    2.50
  -1  11   1   26.80    2.60
   1  11  -1   22.20    2.20
   1  11  -1   23.60    2.60
  -1  11   1   24.00    3.00
  -1  11   1   26.30    2.20
   1  11  -1   33.30    3.20
   0 -11  -1  316.47   16.30
   0 -11  -1  340.27   16.80
   0 -11  -1  337.07   16.20
   0 -11   1  335.27   16.80
   0  11  -1  323.67   16.10
   0  11   1  338.07   16.80
   0  11   1  324.77   16.10
   0  11  -1  331.47   16.30
   0  11   1  332.57   16.20
   0  11  -1  333.77   16.80
   1 -11   1    4.30    2.00
  -1 -11  -1    2.10    1.90
  -1 -11  -1    3.10    1.70
   1 -11   1    2.00    1.20
  -1 -11  -1    0.40    1.40
  -1  11  -1    1.30    1.40
  -1  11  -1    0.40    2.00
   1  11   1    0.50    1.90
   1  11   1    0.50    1.30
   1  11   1   -0.50    1.60
  -1  11  -1    1.00    1.30
   2 -11   1   16.60    2.70
  -2 -11  -1   21.40    2.10
   2 -11   1   17.40    1.60
  -2 -11  -1   18.90    2.50
   2  11   1   15.90    2.70
  -2  11  -1   15.60    2.00
   2  11   1   19.60    2.00
  -2  11  -1   16.60    2.70
   3 -11   1   -0.70    1.20
   3 -11   1    0.50    2.10
  -3 -11  -1    6.00    2.10
   3 -11   1    0.90    1.10
  -3 -11  -1    1.70    1.60
   3  11   1    1.90    2.10
  -3  11  -1   -1.80    1.30
  -3  11  -1    0.50    2.10
   3  11   1    0.90    1.30
   4 -11   1   23.40    2.00
   4 -11   1   22.00    2.20
  -4 -11  -1   30.70    2.70
   4 -11   1   29.60    3.10
  -4 -11  -1   22.60    2.70
  -4  11  -1   19.50    2.90
   4  11   1   24.00    2.30
   4  11   1   24.20    3.10
  -4  11  -1   23.90    2.30
   5 -11   1    2.30    2.40
  -5 -11  -1    2.20    2.00
  -5 -11  -1    2.50    2.00
   5 -11   1    3.40    1.10
   5  11   1    3.10    1.70
  -5  11  -1    1.30    2.20
   5  11   1    0.20    2.30
  -5  11  -1    1.30    1.70
  -6 -11  -1  124.69    7.50
  -6 -11  -1  122.79    7.40
   6 -11   1  125.39    6.40
   6 -11   1  129.89    8.00
   6  11   1  128.39    7.10
   6  11   1  127.09    7.70
  -6  11  -1  134.69    7.80
  -6  11  -1  125.79    7.20
   7 -11   1   -3.10    2.60
  -7 -11  -1   -2.70    2.20
  -7 -11  -1   -3.90    1.90
   7 -11   1    1.20    1.20
  -7  11  -1    0.60    2.00
   7  11   1   -0.50    2.50
   7  11   1    0.90    1.70
  -8 -11  -1   28.80    3.70
   8 -11   1   33.00    3.90
  -8 -11  -1   34.00    3.40
   8  11   1   35.50    3.80
  -8  11  -1   34.20    3.30
   8  11   1   27.50    3.00
   9 -11   1   16.90    3.50
  -9 -11  -1   13.20    3.30
  -9 -11  -1   12.30    2.60
  -9  11  -1   10.70    2.60
   9  11   1   12.70    2.40
   9  11   1   13.90    3.40
  10 -11   1    4.90    3.50
 -10 -11  -1   -4.30    2.40
 -10 -11  -1    4.90    3.40
  10  11   1    0.10    3.40
  10  11   1    1.00    2.40
 -10  11  -1    7.30    3.00
  11 -11   1    5.80    3.50
 -11 -11  -1    7.40    3.70
 -11 -11  -1   -0.70    2.40
  11 -11   1   -2.80    3.60
  11  11   1    1.70    2.90
 -11  11  -1   -1.20    3.00
 -10 -12   1    8.10    3.70
  10 -12  -1    7.60    4.00
 -10 -12   1    5.40    2.90
 -10  12   1    3.50    3.20
  10  12  -1   13.60    5.10
  10  12  -1    5.60    3.10
  -9 -12   1    6.30    3.60
  -9 -12   1   -0.40    2.60
   9 -12  -1   -2.80    3.40
  -9  12   1    0.90    2.60
   9  12  -1   -1.90    2.40
   9  12  -1    4.50    3.50
  -8 -12   1   19.70    3.10
   8 -12  -1   20.00    4.00
  -8 -12   1   16.30    3.40
   8  12  -1   14.70    2.80
  -8  12   1   21.40    2.90
   8  12  -1   21.30    3.70
   7 -12  -1   71.59    6.30
  -7 -12   1   62.59    5.60
  -7 -12   1   69.29    5.40
  -7  12   1   65.59    6.20
   7  12  -1   63.79    5.10
  -7  12   1   67.59    5.10
   7  12  -1   56.49    5.70
   6 -12  -1   12.60    1.70
  -6 -12   1   11.90    2.60
  -6 -12   1    6.10    2.50
   6  12  -1   14.60    3.10
  -6  12   1   11.40    3.10
   6  12  -1    9.60    2.30
  -6  12   1   10.30    2.20
   5 -12  -1   37.20    4.00
  -5 -12   1   29.30    3.10
   5 -12  -1   31.80    2.70
  -5 -12   1   32.30    3.30
   5  12  -1   28.10    2.90
  -5  12   1   24.50    3.70
   5  12  -1   34.00    3.70
  -5  12   1   28.00    2.70
   4 -12  -1   37.90    2.90
  -4 -12   1   41.10    3.60
   4 -12  -1   34.60    3.80
  -4 -12   1   36.00    3.20
   4  12  -1   38.60    3.60
   4  12  -1   40.50    4.10
  -4  12   1   35.40    3.80
  -4  12   1   36.00    3.50
  -3 -12   1    0.70    2.10
   3 -12  -1    0.40    2.40
  -3 -12   1    0.40    1.80
  -3  12   1    1.90    1.60
  -3  12   1   -0.40    2.20
   3  12  -1    0.80    1.60
   3  12  -1   -0.90    2.40
   2 -12  -1   24.90    3.40
  -2 -12   1   29.30    2.50
  -2 -12   1   27.10    3.10
   2 -12  -1   25.70    2.70
   2  12  -1   29.10    2.50
   2  12  -1   27.80    3.30
  -2  12   1   25.90    2.30
  -2  12   1   21.00    3.20
  -1 -12   1    7.80    2.30
   1 -12  -1   11.50    1.70
   1 -12  -1   13.20    2.70
  -1 -12   1   13.90    1.80
   1  12  -1    6.90    1.70
  -1  12   1   11.10    1.80
  -1  12   1   13.30    2.80
   1  12  -1    7.50    2.60
   0 -12   1   15.60    1.80
   0 -12   1   10.00    2.60
   0 -12  -1   14.80    2.60
   0 -12  -1   14.80    1.90
   0  12   1   14.10    1.90
   0  12   1    9.60    2.60
   0  12  -1   12.60    1.90
   0  12  -1   11.80    2.60
  -1 -12  -1   71.09    5.40
   1 -12   1   65.09    5.40
  -1 -12  -1   68.29    4.40
   1 -12   1   68.19    4.00
   1  12   1   68.79    5.30
   1  12   1   65.79    4.30
  -1  12  -1   64.19    5.40
  -1  12  -1   65.99    4.30
   2 -12   1   24.60    3.00
   2 -12   1   25.10    2.30
  -2 -12  -1   29.60    3.20
  -2 -12  -1   23.70    2.50
   2  12   1   25.50    3.30
   2  12   1   27.90    2.40
  -2  12  -1   30.20    3.40
  -2  12  -1   25.70    2.40
  -3 -12  -1   60.39    4.80
   3 -12   1   45.10    4.90
   3 -12   1   46.90    3.00
  -3 -12  -1   42.10    3.90
  -3  12  -1   52.69    3.90
  -3  12  -1   51.49    4.80
   3  12   1   53.09    4.90
   3  12   1   46.40    3.70
  -4 -12  -1    3.50    2.10
  -4 -12  -1    1.50    2.10
   4 -12   1    4.40    2.60
   4  12   1    2.00    1.60
   4  12   1    3.50    2.60
  -4  12  -1    3.90    2.50
  -4  12  -1    0.00    1.80
   5 -12   1    4.40    2.60
  -5 -12  -1    6.50    2.20
  -5 -12  -1    7.00    2.50
   5  12   1    9.30    2.80
  -5  12  -1    5.50    1.90
   5  12   1    6.90    1.90
  -5  12  -1    8.30    3.60
  -6 -12  -1    0.20    2.40
  -6 -12  -1    0.70    2.10
   6 -12   1    1.70    3.60
   6  12   1    3.30    2.70
   6  12   1   -0.40    1.80
  -6  12  -1    1.70    2.00
  -6  12  -1    3.10    2.80
  -7 -12  -1    3.80    2.40
   7 -12   1    4.20    3.10
  -7 -12  -1    2.10    2.60
   7  12   1   -0.90    3.00
  -7  12  -1    5.30    2.30
   7  12   1    2.20    2.10
   8 -12   1   21.00    3.90
  -8 -12  -1   17.80    2.90
  -8 -12  -1   19.00    3.40
  -8  12  -1   16.60    3.00
   8  12   1   18.00    2.90
   8  12   1   20.10    3.80
  -9 -12  -1    2.50    3.30
  -9 -12  -1   -0.20    2.60
   9 -12   1   -0.80    3.50
   9  12   1   -4.00    2.50
   9  12   1    1.40    4.40
  -9  12  -1    2.80    2.80
 -10 -12  -1    1.40    3.50
 -10 -12  -1    2.70    2.80
  10 -12   1    4.10    3.80
  10  12   1    2.10    3.80
 -10  12  -1   10.40    3.30
  10  12   1    1.40    2.80
  -9 -13   1    2.50    3.20
  -9 -13   1    5.10    3.80
   9 -13  -1   -2.00    4.00
   9  13  -1    1.90    3.00
  -9  13   1   11.20    3.30
   9  13  -1    4.20    4.10
   8 -13  -1    7.60    4.00
  -8 -13   1    1.80    3.10
   8  13  -1   -2.70    3.50
   8  13  -1   -3.20    2.70
  -8  13   1    4.90    2.80
  -7 -13   1    1.20    3.60
   7 -13  -1    3.70    3.60
  -7 -13   1    5.20    3.00
   7  13  -1    3.70    2.40
  -7  13   1    4.20    2.50
   7  13  -1    2.30    3.90
  -7  13   1   -6.50    3.30
   6 -13  -1    6.50    3.50
  -6 -13   1    1.20    2.80
  -6  13   1    2.20    2.30
  -6  13   1    4.60    3.40
   6  13  -1    4.30    2.40
   5 -13  -1   13.60    3.60
  -5 -13   1    9.90    2.70
  -5 -13   1    8.90    2.90
  -5  13   1   13.30    3.40
   5  13  -1    9.70    2.40
   5  13  -1   11.50    3.30
  -5  13   1    8.70    2.20
  -4 -13   1   -0.80    2.20
  -4 -13   1    1.80    2.80
   4 -13  -1   -2.70    3.10
   4  13  -1    2.60    3.00
  -4  13   1   -1.40    2.90
   4  13  -1   -1.10    1.90
  -4  13   1    1.10    1.90
  -3 -13   1    4.50    2.60
  -3 -13   1    7.30    2.10
   3 -13  -1    5.90    2.90
   3  13  -1    3.50    2.90
  -3  13   1    9.20    3.10
  -3  13   1    3.30    1.80
   3  13  -1    5.90    2.00
   2 -13  -1    1.00    1.60
  -2 -13   1    1.40    2.50
   2 -13  -1    4.10    2.70
  -2 -13   1    1.50    1.80
   2  13  -1    0.60    1.90
  -2  13   1    2.50    1.70
  -2  13   1    3.30    3.30
   2  13  -1    0.00    2.70
   1 -13  -1    3.20    1.70
  -1 -13   1    4.90    1.80
  -1 -13   1    9.30    3.00
  -1  13   1    7.70    4.70
   1  13  -1    3.10    1.70
   1  13  -1    4.60    2.90
  -1  13   1    6.20    1.90
   0 -13  -1    1.40    3.50
   0 -13   1    1.60    1.60
   0 -13  -1    2.40    1.70
   0  13   1    0.10    1.70
   0  13   1    5.60    2.80
   0  13  -1    0.90    1.80
   0  13  -1    2.20    2.80
  -1 -13  -1    8.50    2.80
  -1 -13  -1    5.30    2.00
  -1  13  -1    9.10    3.30
   1  13   1    6.10    1.80
   1  13   1    9.60    3.20
  -1  13  -1    4.90    1.90
  -2 -13  -1   -2.60    2.40
  -2 -13  -1    1.10    1.90
   2 -13   1    0.00    2.70
  -2  13  -1    0.20    1.80
   2  13   1    2.10    2.90
   2  13   1    0.20    1.80
   3 -13   1  121.19    8.10
  -3 -13  -1  124.09    7.70
  -3 -13  -1  121.79    7.10
  -3  13  -1  113.69    7.90
   3  13   1  121.49    8.00
   3  13   1  118.89    6.80
  -3  13  -1  118.79    7.00
  -4 -13  -1    9.50    2.40
  -4 -13  -1    9.10    2.80
   4 -13   1   11.20    3.00
   4  13   1    5.20    2.10
  -4  13  -1   10.00    3.10
  -4  13  -1    9.80    2.20
   4  13   1    8.70    3.40
   5 -13   1   28.90    3.90
  -5 -13  -1   25.10    3.50
  -5 -13  -1   25.30    3.20
  -5  13  -1   26.50    4.10
   5  13   1   25.70    2.80
  -5  13  -1   28.40    2.80
  -6 -13  -1   -3.00    2.70
  -6 -13  -1    4.40    2.80
   6 -13   1    3.00    3.40
   6  13   1    4.10    3.20
  -6  13  -1   -1.10    2.30
   6  13   1   -0.70    2.10
  -6  13  -1    0.80    3.10
  -7 -13  -1    0.90    3.10
   7 -13   1   -0.60    3.40
  -7 -13  -1    7.40    4.40
   7  13   1    3.20    2.30
  -7  13  -1    0.30    2.50
   7  13   1    2.20    3.50
   8 -13   1    2.50    3.70
  -8 -13  -1    1.30    3.40
   8  13   1   -0.40    2.60
   8  13   1    2.00    3.60
  -8  13  -1    5.50    2.80
  -9 -13  -1   33.50    4.90
  -9 -13  -1   47.10    5.00
   9 -13   1   44.90    5.20
   9  13   1   40.20    5.20
   7 -14  -1   23.10    4.70
  -7 -14   1   24.30    3.80
  -7 -14   1   31.60    4.10
  -7  14   1   19.40    3.30
  -7  14   1   21.30    4.60
   7  14  -1   32.70    4.60
   7  14  -1   25.60    3.40
  -6 -14   1   14.40    3.20
  -6 -14   1    7.90    3.20
   6 -14  -1   10.60    4.10
  -6  14   1   12.50    3.90
  -6  14   1   15.40    2.90
   6  14  -1   14.90    4.00
   6  14  -1   13.50    2.90
  -5 -14   1   23.80    3.80
   5 -14  -1   22.50    4.10
  -5 -14   1   25.20    3.40
  -5  14   1   24.60    4.30
   5  14  -1   22.30    3.10
   5  14  -1   30.10    4.40
  -5  14   1   24.80    3.00
   4 -14  -1    7.00    3.60
  -4 -14   1    7.70    3.20
  -4 -14   1    8.20    2.70
   4  14  -1   10.10    2.40
  -4  14   1    7.20    2.30
  -4  14   1    8.50    3.70
   4  14  -1    9.70    3.50
  -3 -14   1    5.80    2.40
   3 -14  -1    8.90    3.30
  -3 -14   1    4.60    2.90
   3  14  -1    9.10    3.50
   3  14  -1    4.90    2.20
  -3  14   1    8.10    2.20
  -3  14   1    2.30    3.30
   2 -14  -1    2.50    3.20
  -2 -14   1    4.70    2.20
  -2 -14   1    4.00    2.90
  -2  14   1    7.20    2.10
   2  14  -1    6.20    2.20
   2  14  -1    5.00    3.30
  -2  14   1    9.00    3.60
  -1 -14   1   18.50    3.30
   1 -14  -1   14.20    3.50
  -1 -14   1   26.60    3.80
  -1  14   1   10.50    3.40
   1  14  -1   22.80    3.90
  -1  14   1   16.90    2.40
   1  14  -1   14.70    2.50
   0 -14  -1   12.70    3.40
   0 -14  -1   10.90    2.20
   0 -14   1   10.40    3.30
   0  14   1   12.50    2.20
   0  14  -1   17.60    3.70
   0  14  -1    7.20    2.20
   0  14   1    9.50    3.60
   1 -14   1   15.60    3.40
  -1 -14  -1   15.40    2.50
  -1 -14  -1   21.20    3.60
  -1  14  -1   12.20    3.40
  -1  14  -1   17.10    2.50
   1  14   1   18.80    3.80
   1  14   1   17.20    2.40
  -2 -14  -1    1.90    2.90
  -2 -14  -1    4.80    2.20
   2 -14   1    8.70    3.30
   2  14   1    4.30    2.10
  -2  14  -1    5.40    3.40
  -2  14  -1    3.40    2.10
   2  14   1    6.20    3.30
  -3 -14  -1    1.00    2.40
  -3 -14  -1    5.50    2.90
   3 -14   1   -0.30    3.20
   3  14   1    2.60    2.20
  -3  14  -1    3.80    3.40
   3  14   1    1.50    3.40
  -3  14  -1    1.00    2.20
   4 -14   1    1.60    3.20
  -4 -14  -1    5.30    2.60
  -4 -14  -1   -2.10    2.70
  -4  14  -1    3.40    3.30
   4  14   1    0.60    2.20
   4  14   1    1.40    3.50
  -4  14  -1    0.60    2.30
  -5 -14  -1    5.30    3.20
   5 -14   1   -1.90    3.20
  -5 -14  -1    2.80    2.90
  -5  14  -1    0.00    2.30
  -5  14  -1    0.80    3.40
   5  14   1    0.70    3.70
   5  14   1    0.60    2.30
  -6 -14  -1   25.30    4.00
   6 -14   1   31.10    4.60
  -6 -14  -1   24.50    3.90
   6  14   1   36.90    3.40
   6  14   1   34.50    4.70
  -6  14  -1   24.80    3.40
  -6  14  -1   38.70    5.10
  -7 -14  -1    3.20    4.10
   7 -14   1    3.20    4.00
  -7 -14  -1    2.80    3.30
  -7  14  -1    3.40    3.00
   7  14   1    1.00    2.60
   7  14   1    2.90    4.00
  -4 -15   1   -3.90    3.20
   4 -15  -1    0.20    3.80
  -4  15   1   -0.80    3.70
   4  15  -1    0.80    2.60
   4  15  -1    8.30    4.00
   3 -15  -1    2.80    3.80
  -3 -15   1   11.20    3.70
  -3  15   1    5.60    4.20
   3  15  -1    5.00    2.50
   3  15  -1    4.90    4.00
  -2 -15   1   18.40    3.90
   2 -15  -1   21.20    4.30
   2  15  -1   23.20    3.00
  -2  15   1   22.20    4.30
   2  15  -1   34.50    4.80
  -1 -15   1   15.80    3.80
   1 -15  -1   10.70    3.70
  -1  15   1   17.40    4.20
   1  15  -1   16.50    2.70
   1  15  -1   15.30    4.00
   0 -15  -1   14.10    3.80
   0 -15   1   12.20    3.70
   0  15   1   17.60    4.30
   0  15  -1   14.40    4.00
   0  15  -1   13.00    2.60
  -1 -15  -1   -3.70    3.40
   1 -15   1    3.20    3.50
  -1  15  -1   -7.00    3.40
   1  15   1    6.80    3.70
  -1  15  -1    2.40    2.30
   2 -15   1    9.20    3.80
  -2 -15  -1   11.80    3.60
  -2  15  -1    0.40    3.70
   2  15   1   -2.10    3.70
  -2  15  -1   10.30    2.60
  -3 -15  -1    1.10    3.40
   3 -15   1   -3.40    3.30
  -3  15  -1    2.70    3.90
   3  15   1   -0.70    3.70
  -3  15  -1    1.30    2.40
  -4 -15  -1   11.70    3.90
   4 -15   1    0.70    3.70
  -4 -15  -1    2.90    3.80
  -4  15  -1    2.60    4.00
   4  15   1   11.10    4.00
  -4  15  -1    5.70    3.10
 -16   0   2    5.00    4.50
  16   0  -2    3.40    3.70
  16   0  -2    2.60    3.00
  15   0  -2    4.00    3.30
  15   0  -2    1.90    2.60
 -15   0   2    4.60    3.60
  14   0  -2   22.80    2.80
 -14   0   2   22.30    3.80
  13   0  -2    0.90    1.90
  13   0  -2    2.00    2.30
 -13   0   2    5.90    2.70
 -12   0   2  132.89    7.90
  12   0  -2  132.49    7.70
  12   0  -2  131.69    7.20
  12   0  -2  131.59    6.90
 -11   0   2   19.10    1.70
 -11   0   2   17.30    2.50
  11   0  -2   16.60    2.20
  11   0  -2   23.80    2.10
  11   0  -2   17.40    1.70
 -10   0   2   61.29    4.40
  10   0  -2   64.09    3.80
  10   0  -2   54.89    4.10
  10   0  -2   69.09    3.60
 -10   0   2   59.59    3.60
   9   0  -2   22.00    2.20
  -9   0   2   15.20    1.90
   9   0  -2   16.90    1.50
   9   0  -2   18.80    2.00
  -9   0   2   16.50    1.70
   8   0  -2  373.26   18.50
   8   0  -2  394.06   18.30
  -8   0   2  371.26   18.60
  -8   0   2  386.06   18.30
   8   0  -2  375.36   18.60
   7   0  -2    5.60    1.00
   7   0  -2    6.70    1.30
   7   0  -2    9.10    1.00
  -7   0   2    7.20    1.20
   7   0  -2    9.30    0.90
  -7   0   2    8.50    0.90
   7   0  -2    8.40    1.50
   6   0  -2   98.49    5.10
  -6   0   2   93.19    4.90
   6   0  -2   99.89    4.90
   6   0  -2   98.79    5.20
   6   0  -2   89.19    5.10
   6   0  -2  100.69    4.90
  -5   0   2   79.99    4.00
   5   0  -2   80.79    4.20
   5   0  -2   80.89    4.30
   5   0  -2   80.79    4.20
   5   0  -2   80.19    4.00
  -5   0   2   80.99    4.10
  -5   0   2   76.89    4.30
   4   0  -2  412.36   19.90
  -4   0   2  415.86   19.90
  -4   0   2  419.46   19.90
   4   0  -2  403.46   19.90
  -4   0   2  408.06   20.00
   4   0  -2  426.56   20.00
   4   0  -2  428.56   19.90
  -3   0   2    0.00    0.50
   3   0  -2   -0.60    0.40
  -3   0   2    0.20    0.30
   3   0  -2   -0.20    0.50
  -3   0   2   -0.40    0.30
   3   0  -2    0.20    0.30
   3   0  -2    0.20    0.40
   2   0  -2  554.74   26.60
   2   0  -2  566.44   26.60
  -2   0   2  565.94   26.60
   2   0  -2  559.34   26.50
  -2   0   2  560.64   26.50
   2   0  -2  550.64   26.50
  -2   0   2  553.44   26.60
   1   0  -2    0.30    0.20
  -1   0  -2   20.90    1.10
   1   0   2   21.30    1.10
  -1   0  -2   20.40    1.10
   1   0   2   19.50    1.00
   1   0   2   22.30    1.10
  -2   0  -2  556.14   26.70
   2   0   2  543.95   26.70
   2   0   2  569.94   26.70
  -2   0  -2  558.24   26.70
   2   0   2  567.04   26.70
  -2   0  -2  570.94   26.70
  -3   0  -2    0.30    0.50
  -3   0  -2    1.10    0.50
   3   0   2    0.70    0.50
   3   0   2    1.40    0.50
  -3   0  -2    1.70    0.50
   3   0   2    0.70    0.40
   4   0   2   42.00    2.00
  -4   0  -2   41.40    2.30
   4   0   2   41.70    2.30
  -4   0  -2   42.10    2.30
   4   0   2   41.30    2.40
   4   0   2   40.50    2.40
  -4   0  -2   36.40    2.30
  -5   0  -2    2.30    0.80
  -5   0  -2    2.80    0.80
   5   0   2    2.50    0.70
   5   0   2    3.80    0.40
  -5   0  -2    2.70    0.90
   5   0   2    3.60    1.00
   5   0   2    4.00    1.00
  -6   0  -2  194.68    9.50
   6   0   2  194.18    9.20
   6   0   2  199.68    9.60
   6   0   2  186.58    9.50
   6   0   2  185.98    9.50
  -7   0  -2   33.70    2.40
   7   0   2   35.90    2.80
   7   0   2   33.60    2.40
  -7   0  -2   38.10    2.60
   7   0   2   35.00    2.70
   7   0   2   37.50    1.90
  -8   0  -2  136.99    7.30
   8   0   2  142.49    6.70
   8   0   2  137.79    7.10
  -8   0  -2  139.89    7.20
   8   0   2  134.29    7.30
   9   0   2   10.70    1.50
  -9   0  -2   11.50    1.80
  -9   0  -2   10.40    1.70
   9   0   2   11.30    1.10
 -10   0  -2   -0.60    1.60
  10   0   2    0.70    1.40
  11   0   2   -0.90    1.60
 -11   0  -2    0.50    1.80
  11   0   2    0.80    1.60
  12   0   2    9.80    2.10
 -12   0  -2   11.50    2.60
  12   0   2    9.50    2.30
  13   0   2    4.50    2.50
  13   0   2    2.70    2.00
 -13   0  -2    4.10    2.70
  14   0   2   33.90    4.20
  14   0   2   36.80    3.60
 -14   0  -2   36.40    4.20
 -15   0  -2   -1.40    3.50
  15   0   2   -0.90    2.70
  15   0   2   -3.50    3.30
 -16   0  -2    1.40    4.10
  16   0   2    4.00    4.10
  16   0   2    6.20    3.40
  16  -1  -2    3.60    3.10
  16  -1  -2    3.30    3.70
 -16  -1   2    0.60    4.20
  16   1  -2    1.90    2.90
  16   1  -2   -3.60    3.60
 -16   1   2    0.30    4.10
  15  -1  -2    0.30    2.60
 -15  -1   2   -1.40    3.50
  15  -1  -2    2.00    3.30
  15   1  -2   -2.20    2.50
 -15   1   2    4.10    3.60
  15   1  -2    0.20    3.10
  14  -1  -2    5.30    4.00
 -14  -1   2    1.30    3.00
  14  -1  -2    3.80    2.30
  14  -1  -2    0.80    2.20
  14   1  -2    2.10    2.20
 -14   1   2    0.50    3.10
  13  -1  -2    2.30    2.40
  13  -1  -2   -1.20    1.80
 -13  -1   2   -4.10    2.50
 -13   1   2    6.00    2.70
  13   1  -2    3.60    2.30
  13   1  -2    1.90    1.80
  12  -1  -2   57.19    4.00
  12  -1  -2   52.99    3.70
 -12  -1   2   61.59    5.00
  12  -1  -2   54.39    4.50
 -12  -1   2   60.69    3.60
  12   1  -2   59.69    4.60
 -12   1   2   60.99    4.80
  12   1  -2   54.99    4.00
  12   1  -2   57.99    3.60
  11  -1  -2   -1.90    1.50
 -11  -1   2   -0.10    1.90
  11  -1  -2   -0.70    1.30
 -11  -1   2    0.40    1.10
  11  -1  -2    2.80    1.40
 -11   1   2    2.90    1.90
  11   1  -2    0.10    1.40
  11   1  -2   -0.50    1.60
  11   1  -2   -0.50    1.20
  10  -1  -2    0.40    1.40
  10  -1  -2    0.20    1.10
  10  -1  -2    3.60    1.30
 -10  -1   2   -0.20    1.00
 -10  -1   2    1.00    1.60
  10  -1  -2    0.50    1.70
 -10   1   2    3.90    1.70
  10   1  -2    2.70    1.10
  10   1  -2    2.80    1.30
 -10   1   2    1.80    1.10
  10   1  -2    4.90    1.60
   9  -1  -2   26.90    2.10
  -9  -1   2   27.30    2.80
  -9  -1   2   29.10    2.00
   9  -1  -2   27.40    2.60
   9  -1  -2   26.10    2.20
   9  -1  -2   24.80    2.60
  -9  -1   2   24.20    2.40
   9   1  -2   27.10    2.60
   9   1  -2   27.10    2.30
   9   1  -2   25.90    2.00
  -9   1   2   27.30    2.50
  -9   1   2   26.40    2.10
  -8  -1   2  413.26   19.50
   8  -1  -2  416.06   19.40
  -8  -1   2  396.16   19.70
  -8  -1   2  406.06   19.30
   8  -1  -2  385.46   19.60
   8  -1  -2  407.86   19.50
   8  -1  -2  421.16   19.90
  -8   1   2  400.66   19.40
   8   1  -2  388.16   19.40
   8   1  -2  397.46   19.60
  -8   1   2  390.86   19.70
   8   1  -2  410.66   19.30
  -7  -1   2   34.80    2.80
   7  -1  -2   42.90    2.80
  -7  -1   2   39.90    2.30
   7  -1  -2   45.80    2.90
  -7  -1   2   42.80    2.50
   7  -1  -2   40.10    2.50
   7  -1  -2   42.00    2.40
   7   1  -2   36.20    2.70
   7   1  -2   39.30    3.90
   7   1  -2   40.80    2.40
  -7   1   2   37.50    2.40
  -7   1   2   38.70    2.80
   7   1  -2   39.70    2.80
   7   1  -2   41.50    2.30
  -6  -1   2  331.57   15.90
  -6  -1   2  329.57   16.00
   6  -1  -2  343.57   16.00
   6  -1  -2  326.97   16.00
   6  -1  -2  339.07   16.20
  -6  -1   2  320.87   16.20
   6  -1  -2  331.97   16.10
  -6   1   2  325.37   16.00
   6   1  -2  342.07   16.20
   6   1  -2  322.57   16.00
   6   1  -2  322.67   16.10
   6   1  -2  347.67   15.90
   5  -1  -2    0.60    0.70
  -5  -1   2    1.20    0.90
  -5  -1   2    0.70    0.50
   5  -1  -2    0.20    0.60
   5  -1  -2    0.10    0.60
   5  -1  -2    1.00    0.60
   5  -1  -2   -1.70    0.80
  -5  -1   2    0.50    0.50
   5   1  -2    0.90    0.70
   5   1  -2   -0.10    0.60
  -5   1   2   -0.10    0.60
  -5   1   2    1.30    0.80
   5   1  -2    0.80    0.60
   4  -1  -2   33.80    1.90
   4  -1  -2   31.40    2.00
   4  -1  -2   32.10    2.00
   4  -1  -2   31.50    1.80
  -4  -1   2   32.40    2.00
  -4  -1   2   32.30    1.80
  -4  -1   2   34.60    1.80
   4   1  -2   35.20    2.10
  -4   1   2   33.00    2.00
   4   1  -2   32.90    1.90
   4   1  -2   31.30    1.80
   4   1  -2   32.30    1.80
  -4   1   2   30.60    1.80
   3  -1  -2   10.80    0.90
  -3  -1   2   11.80    0.80
  -3  -1   2   12.00    1.10
   3  -1  -2   11.90    1.00
  -3  -1   2   12.80    1.00
   3  -1  -2   10.90    0.90
   3  -1  -2   11.50    1.00
  -3  -1   2   11.30    0.80
   3   1  -2   11.10    0.90
  -3   1   2    8.60    1.00
  -3   1   2    8.60    0.90
   3   1  -2   10.90    0.80
   3   1  -2   10.50    0.80
   3   1  -2   11.40    1.00
   2  -1  -2 1657.33   84.19
  -2  -1   2 1954.50   84.49
  -2  -1   2 1699.43   84.19
   2  -1  -2 1656.63   84.19
   2  -1  -2 1674.73   84.19
   2  -1  -2 1650.63   84.19
  -2  -1   2 1630.04   84.19
   2   1  -2 1699.93   84.19
  -2   1   2 1929.91   84.49
   2   1  -2 1634.64   84.19
  -2   1   2 1863.51   84.39
   2   1  -2 2015.90   84.59
  -2   1   2 1854.81   84.49
   2   1  -2 1952.50   84.29
   1  -1  -2  362.26   17.00
  -1  -1   2  354.76   17.00
  -1  -1   2  367.36   17.00
   1  -1  -2  360.46   17.00
   1  -1  -2  365.56   17.00
  -1  -1   2  357.46   16.90
   1  -1  -2  354.56   16.90
  -1  -1   2  351.86   17.00
  -1   1   2  349.27   16.90
   1   1  -2  354.56   17.00
   1   1  -2  359.66   17.00
   1   1  -2  359.36   16.90
   1   1  -2  353.46   17.00
  -1   1   2  354.66   17.00
  -1   1   2  348.27   17.00
   0  -1   2   26.40    1.40
   0  -1  -2   27.00    1.40
   0  -1   2   25.10    1.30
   0  -1  -2   29.70    1.50
   0   1  -2   28.00    1.40
   0   1   2   29.80    1.40
   0   1   2   26.40    1.40
   0   1  -2   28.00    1.40
  -1  -1  -2  869.21   41.50
   1  -1   2  861.91   41.50
  -1  -1  -2  857.31   41.50
   1  -1   2  846.62   41.50
   1  -1   2  893.11   41.50
   1   1   2  847.82   41.50
   1   1   2  875.91   41.50
  -1   1  -2  868.01   41.50
  -1   1  -2  855.91   41.50
   1   1   2  980.50   41.60
  -1   1  -2  870.01   41.50
   2  -1   2 9344.07  453.45
   2  -1   2 9670.63  453.65
   2  -1   2 9750.22  453.85
  -2  -1  -2 9896.71  453.75
   2  -1   2 9321.67  453.35
  -2  -1  -2 9428.26  453.15
  -2  -1  -2 9480.65  453.75
   2   1   2 9818.92  453.65
  -2   1  -2 9407.06  453.75
  -2   1  -2 9279.07  453.45
  -2   1  -2 9789.22  453.45
   2   1   2 9569.54  453.15
   2   1   2 9773.32  453.85
   2   1   2 9415.96  453.75
  -3  -1  -2  605.74   28.30
   3  -1   2  602.34   28.30
   3  -1   2  568.64   28.30
   3  -1   2  608.54   28.30
   3  -1   2  576.54   28.20
   3   1   2  582.74   28.30
   3   1   2  611.74   28.30
   3   1   2  603.54   28.30
  -3   1  -2  588.84   28.30
  -3   1  -2  594.84   28.30
   4  -1   2   89.89    4.30
  -4  -1  -2   90.19    4.40
   4  -1   2   86.69    4.50
  -4  -1  -2   86.49    4.50
   4  -1   2   91.59    4.50
   4  -1   2   87.29    4.50
   4  -1   2   88.19    4.30
   4   1   2   90.09    4.50
   4   1   2   89.49    4.50
  -4   1  -2   85.69    4.50
   4   1   2   87.09    4.50
  -4   1  -2   85.59    4.50
  -5  -1  -2   62.69    3.30
   5  -1   2   60.99    3.30
  -5  -1  -2   59.79    3.40
   5  -1   2   59.39    3.40
   5  -1   2   62.69    3.10
   5  -1   2   58.99    3.30
   5  -1   2   59.29    3.10
   5   1   2   61.29    3.30
  -5   1  -2   60.39    3.30
   5   1   2   65.29    3.50
  -5   1  -2   56.39    3.40
   5   1   2   60.39    3.40
   6  -1   2    3.50    0.60
  -6  -1  -2    5.30    1.00
   6  -1   2    3.50    1.00
  -6  -1  -2    2.40    1.00
   6  -1   2    3.70    1.00
   6  -1   2    3.00    0.60
   6  -1   2    3.60    1.10
   6   1   2    3.30    1.10
   6   1   2    5.30    1.00
  -6   1  -2    1.90    0.90
  -6   1  -2    1.90    1.00
   6   1   2    3.10    1.20
  -7  -1  -2   94.99    4.90
  -7  -1  -2   90.19    5.00
   7  -1   2   89.39    4.80
   7  -1   2   92.09    4.50
   7  -1   2   92.79    5.00
   7  -1   2   88.89    4.60
   7  -1   2   92.69    5.00
   7   1   2   90.29    4.80
   7   1   2   92.19    5.10
   7   1   2   95.29    5.00
  -7   1  -2   86.69    4.90
  -7   1  -2   89.09    5.00
  -8  -1  -2  104.99    5.60
   8  -1   2   91.39    5.60
  -8  -1  -2  102.59    5.40
   8  -1   2  103.39    5.10
   8  -1   2  101.19    5.40
   8   1   2  102.19    5.40
  -8   1  -2  100.39    5.50
   8   1   2   98.89    5.40
  -9  -1  -2   62.19    3.90
   9  -1   2   60.09    3.80
   9  -1   2   63.69    3.30
   9  -1   2   65.29    3.30
  -9  -1  -2   59.69    4.10
   9   1   2   56.69    3.70
  -9   1  -2   64.09    4.10
   9   1   2   59.09    3.90
  10  -1   2    4.20    1.00
 -10  -1  -2    8.00    1.90
  10  -1   2    4.70    1.50
  10  -1   2    4.70    1.00
 -10   1  -2    6.00    1.80
  10   1   2    3.60    1.50
  10   1   2    5.70    1.50
 -11  -1  -2    1.20    2.00
  11  -1   2    3.40    1.20
  11  -1   2    1.40    1.50
  11  -1   2    2.10    1.00
  11   1   2    2.40    1.50
  11   1   2    6.60    1.70
 -11   1  -2    2.50    1.90
  12  -1   2   13.90    2.10
 -12  -1  -2   14.00    2.80
  12  -1   2    8.20    2.40
 -12   1  -2    8.90    2.60
  12   1   2   13.80    2.20
  12   1   2   12.00    2.30
  13  -1   2    1.30    2.10
  13  -1   2    2.30    2.40
 -13  -1  -2   -1.60    2.60
  13   1   2    1.90    2.30
 -13   1  -2    3.90    2.50
  13   1   2    4.40    2.00
  14  -1   2    5.40    3.00
 -14  -1  -2    6.10    3.20
  14  -1   2    4.90    2.40
 -14   1  -2    5.80    3.00
  14   1   2    6.50    3.00
  14   1   2    8.30    2.60
 -15  -1  -2   -2.00    3.40
  15  -1   2   -3.60    2.70
  15  -1   2    1.70    3.30
  15   1   2    1.90    3.20
  15   1   2   -3.30    2.70
 -15   1  -2    6.70    3.70
  16  -1   2   -5.80    4.00
 -16  -1  -2    3.00    4.40
 -16   1  -2    1.10    4.40
  16   1   2    4.70    3.80
  16   1   2    3.20    3.40
 -16  -2   2    0.00    4.30
  16  -2  -2    3.60    3.90
  16  -2  -2    5.00    3.20
 -16   2   2    1.00    4.30
  16   2  -2    3.50    3.30
  16   2  -2    4.00    3.70
 -15  -2   2    3.70    3.70
  15  -2  -2    3.60    3.20
  15  -2  -2   -4.90    2.50
  15   2  -2    1.50    2.70
  15   2  -2   -0.30    2.90
 -15   2   2    4.70    3.60
 -14  -2   2   -0.60    5.00
  14  -2  -2    2.30    2.10
  14  -2  -2    4.50    2.30
  14   2  -2    3.70    2.20
 -14   2   2    0.10    3.00
  14   2  -2    0.30    2.90
 -13  -2   2   19.20    2.00
  13  -2  -2   20.60    2.90
 -13  -2   2   23.50    3.40
  13  -2  -2   19.70    2.40
  13  -2  -2   22.20    2.60
  13   2  -2   25.60    2.60
 -13   2   2   24.90    3.30
  13   2  -2   17.00    2.80
 -12  -2   2    6.80    1.40
  12  -2  -2    4.20    2.00
  12  -2  -2    9.20    1.90
 -12  -2   2    5.50    2.40
  12  -2  -2    4.20    1.70
  12   2  -2    5.80    2.10
  12   2  -2    2.60    1.50
  12   2  -2    4.80    1.80
 -12   2   2    5.40    2.40
  11  -2  -2    7.30    1.70
 -11  -2   2    8.90    1.30
  11  -2  -2   10.10    2.00
 -11  -2   2    7.60    2.20
  11  -2  -2    8.10    1.60
 -11  -2   2    9.70    2.20
  11   2  -2    9.90    1.40
 -11   2   2    9.10    2.10
  11   2  -2    4.70    1.90
  11   2  -2    7.00    1.60
 -10  -2   2    8.10    1.60
  10  -2  -2    7.30    1.30
  10  -2  -2    7.50    1.50
 -10  -2   2    8.40    2.00
 -10  -2   2    4.80    1.10
  10   2  -2    5.10    1.40
  10   2  -2    5.90    1.20
  10   2  -2    4.80    1.60
 -10   2   2    5.80    1.80
  -9  -2   2   -0.80    0.80
  -9  -2   2   -1.00    1.20
   9  -2  -2    0.10    1.00
   9  -2  -2    1.50    1.60
  -9  -2   2    0.20    1.40
   9  -2  -2    1.80    1.00
  -9   2   2    1.70    1.40
   9   2  -2    0.90    1.30
   9   2  -2    0.00    1.00
   9   2  -2    0.50    1.00
   8  -2  -2   22.10    1.90
   8  -2  -2   21.10    2.10
  -8  -2   2   20.10    2.00
   8  -2  -2   22.00    2.00
   8  -2  -2   20.90    1.90
  -8  -2   2   23.10    2.00
  -8  -2   2   23.60    1.70
   8   2  -2   25.50    2.20
   8   2  -2   20.30    1.80
  -8   2   2   23.90    2.40
   8   2  -2   19.00    2.10
   7  -2  -2   47.70    2.80
   7  -2  -2   46.70    3.20
  -7  -2   2   51.29    2.80
   7  -2  -2   49.90    3.20
   7  -2  -2   50.59    3.00
  -7  -2   2   51.89    2.70
  -7  -2   2   46.80    3.20
  -7   2   2   48.20    2.80
   7   2  -2   42.00    3.00
   7   2  -2   50.19    2.80
  -7   2   2   46.70    3.10
   7   2  -2   44.90    3.30
   7   2  -2   47.60    2.70
  -6  -2   2    7.60    1.30
   6  -2  -2    5.80    1.00
   6  -2  -2    5.10    1.10
  -6  -2   2    7.50    1.00
   6  -2  -2    5.50    1.20
  -6  -2   2    7.50    0.90
   6  -2  -2    7.90    1.10
   6  -2  -2    6.10    0.90
   6   2  -2    6.80    1.40
   6   2  -2    6.30    0.90
  -6   2   2    6.80    1.00
   6   2  -2    5.30    1.00
  -6   2   2    7.70    1.20
   6   2  -2    9.10    0.90
  -5  -2   2  177.98    8.50
   5  -2  -2  175.28    8.60
  -5  -2   2  180.18    8.50
   5  -2  -2  180.18    8.70
  -5  -2   2  169.88    8.70
   5  -2  -2  176.28    8.60
   5  -2  -2  180.18    8.60
  -5   2   2  169.68    8.60
  -5   2   2  167.78    8.60
   5   2  -2  165.18    8.60
  -5   2   2  171.88    8.60
   5   2  -2  172.78    8.50
   5   2  -2  177.78    8.50
   5   2  -2  177.28    8.70
  -4  -2   2   16.10    1.30
  -4  -2   2   16.10    1.20
  -4  -2   2   14.80    1.40
   4  -2  -2   17.30    1.40
   4  -2  -2   17.40    1.30
   4  -2  -2   15.40    1.40
   4  -2  -2   16.10    1.40
   4   2  -2   14.50    1.30
   4   2  -2   16.60    1.20
  -4   2   2   14.10    1.30
   4   2  -2   17.00    1.50
  -4   2   2   15.70    1.30
   4   2  -2   15.10    1.30
  -4   2   2   17.50    1.30
   3  -2  -2 4871.31  224.48
  -3  -2   2 4511.15  224.58
  -3  -2   2 4760.02  224.58
  -3  -2   2 5103.99  224.48
   3  -2  -2 4454.05  224.28
   3  -2  -2 4814.62  224.58
   3  -2  -2 4626.94  224.48
  -3   2   2 4553.54  224.58
   3   2  -2 4834.42  224.48
  -3   2   2 4549.65  224.48
   3   2  -2 4939.51  224.58
  -3   2   2 4759.42  224.58
   3   2  -2 4485.85  224.48
  -3   2   2 4735.13  224.68
   3   2  -2 4925.31  224.68
  -2  -2   2   -0.50    0.40
  -2  -2   2    0.20    0.50
   2  -2  -2    0.00    0.40
  -2  -2   2    0.70    0.40
  -2  -2   2    0.10    0.50
   2  -2  -2    0.40    0.40
  -2   2   2    0.00    0.30
   2   2  -2   -0.10    0.40
   2   2  -2    0.50    0.50
   2   2  -2    0.00    0.40
   2   2  -2    0.20    0.40
  -2   2   2    0.40    0.50
   1  -2  -2   91.49    4.50
   1  -2  -2   94.59    4.40
   1  -2  -2   89.19    4.50
  -1  -2   2   90.59    4.40
  -1  -2   2   87.59    4.50
   1  -2  -2   92.09    4.40
  -1  -2   2   89.59    4.40
  -1  -2   2   88.09    4.40
  -1   2   2   91.59    4.40
   1   2  -2   87.29    4.40
   1   2  -2   91.79    4.40
   1   2  -2   91.69    4.40
  -1   2   2   89.39    4.50
  -1   2   2   93.19    4.40
   1   2  -2   90.49    4.50
   0  -2  -2    7.40    0.70
   0  -2   2    6.30    0.50
   0  -2  -2    7.70    0.80
   0  -2   2    8.00    0.70
   0  -2  -2    8.10    0.50
   0  -2   2    7.00    0.70
   0  -2   2    8.40    0.70
   0   2   2    7.50    0.70
   0   2  -2    7.30    0.70
   0   2  -2   10.00    0.80
   0   2  -2    5.90    0.50
   0   2  -2    7.00    0.80
   0   2   2    7.70    0.70
  -1  -2  -2  108.09    5.20
   1  -2   2  109.79    5.30
  -1  -2  -2  104.29    5.20
   1  -2   2  107.29    5.20
  -1  -2  -2  103.99    5.20
  -1  -2  -2  107.39    5.30
   1  -2   2  106.49    5.30
  -1   2  -2  109.19    5.30
   1   2   2  104.69    5.30
  -1   2  -2  108.09    5.30
   1   2   2  108.39    5.20
   1   2   2  109.69    5.20
  -1   2  -2  105.09    5.20
  -2  -2  -2  170.38    8.20
   2  -2   2  166.68    8.00
   2  -2   2  172.18    8.20
   2  -2   2  170.78    8.20
  -2  -2  -2  168.78    8.10
   2  -2   2  170.18    8.10
  -2  -2  -2  155.58    8.20
  -2   2  -2  168.78    8.10
  -2   2  -2  167.08    8.00
   2   2   2  166.28    8.10
   2   2   2  173.98    8.20
   2   2   2  170.28    8.10
  -2   2  -2  168.58    8.10
   2   2   2  160.78    8.10
  -3  -2  -2 1333.37   64.29
   3  -2   2 1384.16   64.29
   3  -2   2 1357.36   64.19
   3  -2   2 1332.67   64.19
  -3  -2  -2 1342.57   64.19
  -3  -2  -2 1373.76   64.29
   3  -2   2 1369.26   64.29
   3   2   2 1390.86   64.29
   3   2   2 1331.57   64.29
  -3   2  -2 1325.07   64.19
   3   2   2 1344.87   64.29
  -3   2  -2 1354.56   64.29
   3   2   2 1353.66   64.19
  -4  -2  -2    5.40    0.90
   4  -2   2    6.80    0.90
  -4  -2  -2    6.30    0.80
  -4  -2  -2    5.70    0.50
   4  -2   2    5.20    0.80
   4  -2   2    5.60    0.70
   4  -2   2    6.90    0.90
   4  -2   2    4.20    0.80
   4   2   2    4.50    0.90
   4   2   2    5.10    0.80
   4   2   2    4.50    0.60
  -4   2  -2    4.20    0.70
   4   2   2    6.20    0.80
  -4   2  -2    5.00    0.80
   5  -2   2   84.69    4.40
   5  -2   2   90.09    4.50
   5  -2   2   85.49    4.40
  -5  -2  -2   89.69    4.30
  -5  -2  -2   77.09    4.90
   5  -2   2   90.29    4.60
  -5  -2  -2   90.79    4.50
   5  -2   2   87.09    4.60
   5   2   2   85.49    4.50
  -5   2  -2   84.79    4.60
   5   2   2   89.59    4.60
   5   2   2   89.89    4.70
   5   2   2   86.09    4.30
   5   2   2   84.79    4.50
  -5   2  -2   85.59    4.50
   6  -2   2    0.80    0.70
  -6  -2  -2    0.10    0.50
   6  -2   2    0.20    0.80
  -6  -2  -2    0.50    1.00
   6  -2   2    0.00    0.90
  -6  -2  -2   -0.50    0.90
   6  -2   2   -0.20    0.70
   6  -2   2   -1.00    0.90
  -6   2  -2   -1.80    0.90
  -6   2  -2   -0.90    0.90
   6   2   2    0.50    1.10
   6   2   2   -1.60    0.90
   6   2   2   -0.10    0.50
   6   2   2    0.20    0.80
   6   2   2    1.10    0.80
  -7  -2  -2   26.60    1.50
   7  -2   2   26.90    2.40
  -7  -2  -2   25.50    2.00
   7  -2   2   26.20    2.10
   7  -2   2   28.10    2.40
   7  -2   2   25.50    1.80
  -7  -2  -2   26.40    2.40
   7  -2   2   26.90    1.80
  -7   2  -2   26.50    2.20
   7   2   2   25.20    2.10
  -7   2  -2   26.70    2.20
   7   2   2   25.60    2.20
   7   2   2   26.80    1.60
   7   2   2   26.90    2.60
   7   2   2   29.90    2.40
   8  -2   2   10.80    1.10
  -8  -2  -2    8.40    1.50
   8  -2   2   11.70    1.60
   8  -2   2   11.80    1.40
   8  -2   2   10.40    1.10
  -8  -2  -2   10.20    1.40
   8   2   2    8.90    1.40
  -8   2  -2   10.80    1.50
  -8   2  -2    8.10    1.40
   8   2   2   10.10    1.40
   9  -2   2   13.00    1.30
   9  -2   2   12.90    1.30
  -9  -2  -2   10.50    1.70
   9  -2   2   14.00    1.70
  -9  -2  -2   13.00    1.80
   9   2   2   15.30    1.70
   9   2   2   13.20    1.80
  -9   2  -2   13.30    1.80
  10  -2   2    0.30    1.00
 -10  -2  -2    0.00    1.60
  10  -2   2    1.40    1.30
  10  -2   2   -0.90    1.10
 -10   2  -2   -2.80    1.60
  10   2   2   -0.10    1.50
  10   2   2   -0.90    1.50
 -11  -2  -2   17.90    2.70
  11  -2   2   21.50    2.30
  11  -2   2   17.70    1.70
  11  -2   2   18.00    1.60
  11   2   2   22.10    2.60
 -11   2  -2   16.90    2.50
  11   2   2   18.10    2.10
  12  -2   2    1.90    1.80
 -12  -2  -2   -3.60    2.10
  12  -2   2   -1.50    1.30
  12  -2   2    0.60    1.30
  12   2   2    0.10    2.00
  12   2   2    1.40    1.90
 -12   2  -2    0.80    2.20
 -13  -2  -2   12.30    2.90
  13  -2   2    4.90    2.10
  13  -2   2    8.10    1.50
  13   2   2    7.40    2.30
 -13   2  -2   11.80    2.70
  13   2   2    6.60    2.60
 -14  -2  -2    0.40    4.50
  14  -2   2   -0.60    2.90
  14  -2   2    1.10    2.40
  14   2   2    2.90    2.30
 -14   2  -2    2.50    3.00
  14   2   2    0.10    2.60
  15  -2   2    4.40    3.40
  15  -2   2    3.60    3.10
 -15  -2  -2    4.40    4.00
  15   2   2    3.40    3.00
  15   2   2    5.30    3.20
 -15   2  -2   -1.60    3.60
  16  -2   2    2.30    3.60
 -16  -2  -2    2.90    4.30
  16  -2   2   12.20    4.20
  16   2   2    7.60    3.90
 -16   2  -2    9.90    4.40
  16   2   2    5.60    3.50
  16  -3  -2    1.60    3.10
  16  -3  -2    1.60    3.90
 -16  -3   2    3.20    4.40
  16   3  -2    9.10    3.80
 -16   3   2   -0.30    4.20
  16   3  -2    9.20    3.40
 -15  -3   2   17.80    4.10
  15  -3  -2   10.00    2.90
  15  -3  -2   16.50    3.80
  15   3  -2   20.00    3.70
 -15   3   2   19.80    4.10
  15   3  -2   24.70    3.30
  14  -3  -2   16.80    2.60
 -14  -3   2    9.50    3.50
  14  -3  -2   19.80    4.70
  14  -3  -2   14.00    2.70
 -14   3   2   19.30    3.50
  14   3  -2   16.80    2.90
  14   3  -2   17.20    3.10
  13  -3  -2   -1.00    2.00
  13  -3  -2   -2.80    1.80
 -13  -3   2    0.40    2.50
 -13  -3   2    0.00    1.50
  13  -3  -2    0.50    2.30
 -13   3   2   -0.30    2.40
  13   3  -2    3.40    2.00
  13   3  -2   -0.30    2.20
  12  -3  -2   -1.70    1.70
  12  -3  -2    0.00    1.80
 -12  -3   2   -0.60    2.20
  12  -3  -2    1.60    2.10
 -12  -3   2    2.50    1.30
  12  -3  -2   -1.60    1.70
  12   3  -2    0.50    1.90
  12   3  -2   -0.60    1.60
  12   3  -2    1.80    1.80
 -12   3   2    2.10    2.20
  11  -3  -2    4.10    1.70
 -11  -3   2    6.50    2.10
 -11  -3   2    8.30    1.30
  11  -3  -2    6.10    1.60
  11  -3  -2    6.60    1.70
  11   3  -2    7.30    1.50
  11   3  -2    9.90    1.80
 -11   3   2    8.00    2.00
  11   3  -2    4.10    1.80
 -10  -3   2   37.90    3.70
  10  -3  -2   45.80    3.20
  10  -3  -2   40.70    3.00
 -10  -3   2   39.60    2.70
 -10  -3   2   41.00    3.10
  10   3  -2   42.10    3.10
  10   3  -2   41.90    2.90
  10   3  -2   39.70    3.30
 -10   3   2   38.80    3.50
   9  -3  -2   -0.30    1.20
  -9  -3   2    1.70    1.20
  -9  -3   2   -0.10    0.90
   9  -3  -2    0.30    1.10
   9  -3  -2   -1.10    1.90
  -9  -3   2    1.20    1.50
  -9   3   2   -0.10    1.40
   9   3  -2   -0.80    1.20
   9   3  -2    0.50    1.20
   9   3  -2    0.20    1.10
   8  -3  -2  100.69    5.40
   8  -3  -2   98.69    5.60
  -8  -3   2  100.29    5.30
  -8  -3   2  101.69    5.70
  -8  -3   2  104.99    5.20
   8  -3  -2  102.39    5.60
   8  -3  -2   95.69    5.30
   8   3  -2  105.19    5.30
   8   3  -2  101.39    5.50
  -8   3   2   98.49    5.50
   7  -3  -2    1.40    1.20
   7  -3  -2    0.10    1.10
  -7  -3   2    2.90    0.90
   7  -3  -2    3.30    1.00
  -7  -3   2    2.30    0.80
   7  -3  -2    1.70    1.00
  -7  -3   2    1.70    1.20
   7  -3  -2    2.00    1.30
  -7   3   2    1.50    1.10
   7   3  -2    3.60    1.00
   7   3  -2    1.20    0.90
   7   3  -2    1.80    0.90
  -7   3   2    1.60    1.00
   7   3  -2    2.60    1.40
   6  -3  -2    0.40    0.90
  -6  -3   2    1.10    0.70
  -6  -3   2    1.00    0.80
   6  -3  -2    0.60    0.90
   6  -3  -2    1.60    1.00
   6  -3  -2    0.50    1.10
  -6  -3   2    1.70    1.10
   6   3  -2    1.70    0.80
   6   3  -2    1.20    1.10
  -6   3   2    2.60    0.90
   6   3  -2    0.50    0.70
   6   3  -2    3.20    0.90
  -6   3   2    1.20    0.90
   5  -3  -2   19.00    1.70
  -5  -3   2   19.00    1.70
  -5  -3   2   18.50    1.50
   5  -3  -2   17.50    1.70
   5  -3  -2   21.70    1.80
   5  -3  -2   18.10    1.80
  -5  -3   2   18.20    1.50
  -5   3   2   16.30    1.70
   5   3  -2   19.60    1.90
   5   3  -2   19.30    1.60
  -5   3   2   18.30    1.80
   5   3  -2   17.90    1.50
   4  -3  -2    5.40    0.90
  -4  -3   2    5.30    1.00
   4  -3  -2    6.10    0.90
  -4  -3   2    7.60    0.90
  -4  -3   2    6.20    0.80
   4  -3  -2    7.10    0.90
   4  -3  -2    6.70    1.00
  -4  -3   2    7.60    0.90
   4   3  -2    6.80    1.10
   4   3  -2    5.40    0.90
   4   3  -2    6.30    0.80
   4   3  -2    7.80    0.90
  -4   3   2    6.60    0.90
  -4   3   2    6.90    1.00
  -3  -3   2   11.60    1.20
  -3  -3   2   13.00    1.20
   3  -3  -2   11.10    1.20
  -3  -3   2   12.60    1.10
   3  -3  -2   11.80    1.10
  -3  -3   2   11.80    1.10
   3  -3  -2   11.50    1.10
   3  -3  -2   13.20    1.10
  -3   3   2   11.60    1.10
   3   3  -2   13.60    1.20
  -3   3   2   12.00    1.30
   3   3  -2   12.30    1.10
   3   3  -2   11.90    1.20
   3   3  -2   10.30    1.10
   2  -3  -2   38.40    2.20
   2  -3  -2   36.00    2.00
  -2  -3   2   35.80    2.00
  -2  -3   2   33.20    2.10
   2  -3  -2   38.60    2.20
  -2  -3   2   38.70    2.10
  -2  -3   2   36.10    2.10
   2  -3  -2   39.40    2.00
   2   3  -2   37.40    2.10
   2   3  -2   37.80    2.10
  -2   3   2   37.80    2.00
   2   3  -2   37.00    2.00
  -2   3   2   34.90    2.10
   2   3  -2   37.30    2.10
   1  -3  -2  123.89    6.40
   1  -3  -2  131.29    6.30
  -1  -3   2  135.69    6.30
  -1  -3   2  131.39    6.30
   1  -3  -2  133.29    6.40
   1  -3  -2  129.69    6.20
  -1  -3   2  118.09    6.40
  -1  -3   2  126.79    6.40
   1   3  -2  127.49    6.30
   1   3  -2  133.29    6.30
   1   3  -2  130.19    6.40
  -1   3   2  133.49    6.30
  -1   3   2  131.49    6.30
   1   3  -2  129.69    6.40
  -1   3   2  128.89    6.40
   0  -3   2   13.90    0.80
   0  -3  -2   15.10    1.20
   0  -3  -2   14.40    0.90
   0  -3  -2   14.70    1.20
   0  -3   2   14.50    1.10
   0  -3  -2   14.00    1.00
   0  -3   2   13.80    1.20
   0   3   2   15.20    0.90
   0   3   2   14.60    1.00
   0   3   2   14.60    1.20
   0   3  -2   14.60    1.10
   0   3  -2   14.30    0.80
   0   3  -2   13.40    1.20
   0   3  -2   14.50    1.10
   1  -3   2  356.96   16.90
  -1  -3  -2  355.86   16.80
   1  -3   2  349.87   16.80
  -1  -3  -2  360.46   16.90
   1  -3   2  347.37   16.70
  -1  -3  -2  349.17   16.80
  -1  -3  -2  346.67   16.80
   1  -3   2  347.27   16.90
   1   3   2  342.67   16.70
   1   3   2  347.17   16.90
   1   3   2  359.36   16.80
  -1   3  -2  343.97   16.80
   1   3   2  352.36   16.80
  -1   3  -2  365.86   16.90
  -1   3  -2  347.87   16.90
   2  -3   2    3.70    0.70
  -2  -3  -2    3.10    0.60
  -2  -3  -2    3.00    0.60
   2  -3   2    3.50    0.80
  -2  -3  -2    2.80    0.60
  -2  -3  -2    3.10    0.60
   2  -3   2    2.40    0.60
   2  -3   2    3.50    0.40
  -2   3  -2    2.70    0.60
   2   3   2    2.80    0.50
   2   3   2    3.60    0.60
  -2   3  -2    2.40    0.60
   2   3   2    2.80    0.60
   2   3   2    4.40    0.70
  -2   3  -2    3.40    0.70
  -3  -3  -2   56.79    3.00
  -3  -3  -2   57.49    3.00
   3  -3   2   55.49    3.00
   3  -3   2   54.29    3.00
  -3  -3  -2   53.99    2.90
  -3  -3  -2   58.09    3.10
   3  -3   2   56.89    2.90
   3  -3   2   57.79    3.10
   3   3   2   54.69    3.00
   3   3   2   55.59    3.10
  -3   3  -2   58.19    3.10
  -3   3  -2   54.69    3.00
  -3   3  -2   57.19    2.90
   3   3   2   56.89    3.00
   4  -3   2   56.69    3.20
  -4  -3  -2   61.59    3.20
  -4  -3  -2   57.19    3.00
   4  -3   2   60.69    3.30
   4  -3   2   58.39    3.10
  -4  -3  -2   54.89    3.30
   4  -3   2   61.89    3.30
  -4   3  -2   57.79    3.20
   4   3   2   57.29    3.10
  -4   3  -2   55.09    3.10
   4   3   2   56.29    3.20
   4   3   2   52.49    3.20
   5  -3   2  181.18    9.10
   5  -3   2  182.78    9.00
  -5  -3  -2  178.08    9.10
   5  -3   2  182.28    8.90
  -5  -3  -2  186.18    8.80
   5  -3   2  176.38    9.00
  -5  -3  -2  199.48    9.00
   5  -3   2  194.68    9.10
  -5   3  -2  183.38    9.00
   5   3   2  181.98    9.00
   5   3   2  185.88    9.10
   5   3   2  174.18    9.00
   5   3   2  165.18    9.00
   6  -3   2    2.10    1.00
  -6  -3  -2    1.60    1.10
   6  -3   2    1.20    1.20
   6  -3   2    2.90    0.90
   6  -3   2    1.30    0.90
   6  -3   2    1.60    0.80
  -6  -3  -2    2.50    0.60
  -6  -3  -2    3.40    1.00
   6  -3   2    2.20    1.00
   6   3   2    2.30    1.30
   6   3   2    2.40    0.90
  -6   3  -2    1.20    1.00
   6   3   2    2.20    0.80
   6   3   2    2.50    1.00
  -6   3  -2    2.70    0.90
  -7  -3  -2    6.20    0.80
   7  -3   2    6.40    1.10
   7  -3   2    6.60    1.30
  -7  -3  -2    8.40    1.20
  -7  -3  -2    6.10    1.40
   7  -3   2    6.50    1.50
   7  -3   2    5.20    1.40
   7  -3   2    6.20    1.20
   7  -3   2    5.80    1.00
   7   3   2    7.20    1.40
   7   3   2    4.10    1.00
  -7   3  -2    3.60    1.20
   7   3   2    6.00    1.20
   7   3   2    5.70    1.50
  -7   3  -2    7.40    1.50
   7   3   2    6.00    1.10
  -8  -3  -2   -2.40    1.10
   8  -3   2    0.10    1.00
  -8  -3  -2   -1.60    1.20
   8  -3   2   -0.80    0.90
   8  -3   2   -0.30    1.00
   8  -3   2    0.90    1.30
  -8  -3  -2   -0.30    0.60
  -8   3  -2   -0.10    1.20
   8   3   2    1.30    1.00
   8   3   2   -0.60    0.80
  -8   3  -2    0.30    1.10
   8   3   2    1.30    1.10
   9  -3   2  102.49    5.70
  -9  -3  -2  103.09    5.90
   9  -3   2  105.99    5.40
   9  -3   2  106.69    6.10
   9  -3   2  108.39    5.40
  -9  -3  -2   95.59    5.70
  -9   3  -2   98.69    5.70
  -9   3  -2   92.49    5.70
   9   3   2  105.99    5.80
   9   3   2  103.59    5.10
   9   3   2  100.39    5.60
  10  -3   2   -0.60    1.20
  10  -3   2    0.70    1.30
 -10  -3  -2    0.30    1.60
  10  -3   2    0.90    1.40
  10   3   2    0.70    1.60
 -10   3  -2   -1.20    1.50
  10   3   2   -1.30    1.50
 -11  -3  -2    0.40    2.00
  11  -3   2    3.90    1.60
  11  -3   2    2.50    1.70
  11  -3   2    3.90    1.40
  11   3   2    2.90    1.80
 -11   3  -2    6.40    2.10
  11   3   2    2.40    1.70
  12  -3   2   -1.20    1.70
  12  -3   2   -2.50    1.90
 -12  -3  -2    4.20    2.40
  12  -3   2    0.40    1.50
  12   3   2   -1.40    1.80
 -12   3  -2   -1.70    2.10
  12   3   2   -0.20    1.90
  13  -3   2   26.80    2.70
  13  -3   2   27.70    3.00
 -13  -3  -2   28.10    3.80
  13   3   2   30.10    3.30
  13   3   2   30.30    3.10
 -13   3  -2   24.00    3.50
  14  -3   2   10.00    2.60
 -14  -3  -2   19.30    3.80
 -14   3  -2    8.90    3.30
  14   3   2    8.40    2.80
  14   3   2   17.20    3.00
  15  -3   2    4.30    3.60
  15  -3   2    2.20    2.90
 -15  -3  -2   -0.80    3.90
  15   3   2    6.20    3.40
 -15   3  -2    9.40    6.10
  15   3   2    5.30    3.10
  16  -3   2    5.40    4.10
  16  -3   2   -3.20    3.30
 -16  -3  -2    5.00    4.70
 -16   3  -2   -5.30    4.20
  16   3   2    7.60    4.00
  16   3   2    9.20    3.60
  16  -4  -2    3.20    4.10
  16  -4  -2   10.10    3.30
 -16  -4   2   12.80    5.00
 -16   4   2    5.10    4.50
  16   4  -2    5.60    4.00
  16   4  -2   13.50    3.60
 -15  -4   2    2.50    3.80
  15  -4  -2    6.30    3.40
  15  -4  -2   -0.70    2.70
  15   4  -2    7.20    2.90
  15   4  -2   -2.40    3.20
 -15   4   2    1.10    3.80
  14  -4  -2   20.10    2.90
 -14  -4   2   15.10    3.70
  14  -4  -2   19.20    3.40
  14  -4  -2   17.80    2.90
 -14   4   2   20.40    3.60
  14   4  -2   19.90    3.10
  14   4  -2   16.30    3.20
 -13  -4   2    3.00    2.90
  13  -4  -2    0.00    2.30
  13  -4  -2    7.00    2.70
  13  -4  -2    2.70    2.10
 -13  -4   2    3.20    1.50
  13   4  -2    7.00    2.50
  13   4  -2    5.20    2.20
 -13   4   2    3.20    2.60
 -12  -4   2   16.00    3.10
  12  -4  -2   21.50    2.60
  12  -4  -2   20.40    2.60
 -12  -4   2   23.50    2.40
  12   4  -2   21.20    2.70
 -12   4   2   19.40    2.90
  12   4  -2   20.20    2.40
  11  -4  -2    2.80    1.70
 -11  -4   2    6.00    2.40
  11  -4  -2   -0.60    1.80
  11  -4  -2    2.70    1.70
 -11  -4   2    2.20    1.30
 -11   4   2    3.20    1.90
  11   4  -2    2.80    1.90
  11   4  -2    4.20    1.70
  11   4  -2    2.10    1.70
  10  -4  -2   21.60    2.10
  10  -4  -2   17.00    2.10
 -10  -4   2   17.80    2.00
 -10  -4   2   16.50    2.50
 -10  -4   2   19.30    2.10
  10  -4  -2   21.50    2.20
  10   4  -2   19.70    1.90
  10   4  -2   22.20    2.10
  10   4  -2   20.10    2.30
 -10   4   2   22.90    2.40
   9  -4  -2   11.00    1.60
  -9  -4   2   10.70    1.60
  -9  -4   2   11.80    1.30
   9  -4  -2    9.10    1.60
  -9  -4   2    8.60    1.90
   9  -4  -2    8.90    1.70
   9   4  -2   12.00    1.60
   9   4  -2   12.10    1.60
  -9   4   2    8.60    1.70
   9   4  -2   11.70    1.70
   8  -4  -2   21.60    2.20
   8  -4  -2   20.80    1.90
   8  -4  -2   21.30    2.30
  -8  -4   2   20.60    2.10
  -8  -4   2   21.30    2.20
   8  -4  -2   19.20    2.10
  -8  -4   2   22.40    1.90
   8   4  -2   21.40    1.90
   8   4  -2   22.10    2.20
   8   4  -2   22.60    2.20
  -8   4   2   24.20    2.30
  -8   4   2   21.90    2.30
   7  -4  -2   30.80    2.80
   7  -4  -2   38.00    2.60
  -7  -4   2   31.10    2.70
  -7  -4   2   30.60    2.30
   7  -4  -2   32.10    2.70
  -7  -4   2   29.90    2.10
   7  -4  -2   32.90    2.60
   7   4  -2   31.90    2.40
   7   4  -2   27.40    2.50
  -7   4   2   30.30    2.50
  -7   4   2   30.60    2.40
   6  -4  -2   33.20    2.50
   6  -4  -2   28.60    2.30
  -6  -4   2   30.90    2.10
  -6  -4   2   30.60    2.40
   6  -4  -2   30.60    2.30
  -6  -4   2   28.50    2.30
  -6  -4   2   30.40    2.00
   6  -4  -2   26.00    2.30
  -6   4   2   28.10    2.20
   6   4  -2   29.20    2.10
   6   4  -2   30.20    2.60
   6   4  -2   29.40    2.30
   6   4  -2   27.60    2.10
   5  -4  -2   -0.80    1.10
  -5  -4   2    0.20    0.80
   5  -4  -2   -0.50    0.80
  -5  -4   2    0.00    0.70
   5  -4  -2    1.50    1.00
   5  -4  -2    0.40    0.90
  -5  -4   2    0.50    0.70
  -5  -4   2   -1.20    0.90
  -5   4   2   -1.10    0.80
   5   4  -2    1.30    1.10
   5   4  -2   -0.20    0.80
   5   4  -2   -0.20    0.80
  -5   4   2    0.90    0.90
   5   4  -2   -0.20    0.80
  -4  -4   2   53.49    3.00
  -4  -4   2   56.99    3.00
   4  -4  -2   53.59    3.00
   4  -4  -2   54.69    3.10
  -4  -4   2   52.49    3.00
   4  -4  -2   53.19    3.20
  -4  -4   2   52.09    3.20
   4  -4  -2   52.69    3.00
  -4   4   2   49.99    3.20
   4   4  -2   55.39    3.00
   4   4  -2   50.59    3.00
  -4   4   2   53.69    3.00
   4   4  -2   53.09    3.00
   4   4  -2   52.99    3.20
  -3  -4   2   12.90    1.20
   3  -4  -2   10.30    1.20
  -3  -4   2   13.40    1.30
   3  -4  -2   11.30    1.30
   3  -4  -2    8.10    1.10
   3  -4  -2   12.80    1.20
  -3  -4   2   11.80    1.10
   3  -4  -2   12.30    1.20
   3  -4  -2   10.30    1.00
  -3  -4   2   11.90    1.10
   3   4  -2   12.80    1.30
   3   4  -2   11.90    1.20
  -3   4   2   11.30    1.20
  -3   4   2   11.40    1.00
   3   4  -2   10.00    1.00
   3   4  -2   11.80    1.10
  -2  -4   2   -0.50    0.60
   2  -4  -2    0.50    0.60
   2  -4  -2    1.00    0.70
   2  -4  -2    1.00    0.60
   2  -4  -2    0.10    0.80
  -2  -4   2    0.50    0.70
  -2  -4   2   -0.60    0.60
  -2  -4   2    1.00    0.70
   2   4  -2    1.10    0.70
   2   4  -2    0.60    0.60
   2   4  -2    0.40    0.60
  -2   4   2    1.30    0.70
  -2   4   2    0.30    0.50
   2   4  -2   -0.20    0.60
   1  -4  -2    7.70    0.80
   1  -4  -2    6.20    0.90
   1  -4  -2    7.20    1.00
  -1  -4   2    6.40    0.90
  -1  -4   2    9.40    0.80
  -1  -4   2    8.30    0.70
  -1  -4   2    8.00    0.90
   1  -4  -2    7.40    0.70
   1   4  -2    6.90    0.90
   1   4  -2    8.90    0.80
  -1   4   2    6.90    0.70
  -1   4   2    6.00    0.90
   1   4  -2    8.40    0.90
   1   4  -2    8.20    0.70
   0  -4   2   27.70    1.80
   0  -4   2   26.70    1.50
   0  -4   2   26.70    1.60
   0  -4  -2   26.30    1.50
   0  -4   2   27.40    1.80
   0  -4  -2   27.80    1.80
   0  -4  -2   26.20    1.60
   0  -4  -2   27.80    1.80
   0   4   2   26.20    1.60
   0   4  -2   27.50    1.50
   0   4   2   25.80    1.80
   0   4  -2   27.60    1.80
   0   4  -2   24.10    1.80
   0   4  -2   28.30    1.70
   0   4   2   27.10    1.50
   1  -4   2   15.10    1.40
   1  -4   2   16.50    1.20
  -1  -4  -2   13.10    1.20
  -1  -4  -2   13.10    1.40
  -1  -4  -2   14.50    1.40
   1  -4   2   14.70    1.40
  -1  -4  -2   15.00    1.00
   1  -4   2   13.00    0.90
   1   4   2   13.30    1.30
   1   4   2   14.50    1.20
  -1   4  -2   15.00    0.90
  -1   4  -2   14.40    1.40
  -1   4  -2   16.50    1.50
  -1   4  -2   13.40    1.20
   1   4   2   14.30    1.00
   1   4   2   13.40    1.40
   2  -4   2  217.98   10.20
   2  -4   2  215.08   10.50
  -2  -4  -2  217.78   10.30
  -2  -4  -2  210.58   10.40
  -2  -4  -2  212.28   10.40
   2  -4   2  209.38   10.50
   2  -4   2  218.18   10.20
   2  -4   2  213.28   10.40
  -2  -4  -2  208.68   10.40
   2   4   2  206.88   10.30
  -2   4  -2  213.58   10.50
   2   4   2  222.98   10.40
   2   4   2  220.38   10.40
  -2   4  -2  210.98   10.40
  -2   4  -2  221.58   10.50
   2   4   2  201.18   10.40
  -3  -4  -2   11.40    1.20
   3  -4   2   13.90    1.20
  -3  -4  -2   15.50    1.30
   3  -4   2   13.80    1.30
   3  -4   2   13.60    1.10
  -3  -4  -2   13.00    1.30
  -3  -4  -2   15.80    1.40
   3  -4   2   18.00    1.50
   3   4   2   13.40    1.30
  -3   4  -2   12.70    1.20
   3   4   2   13.20    1.30
   3   4   2   15.10    1.30
  -3   4  -2   16.20    1.60
   3   4   2   13.70    1.40
  -4  -4  -2  146.89    7.10
   4  -4   2  134.19    7.10
  -4  -4  -2  143.09    7.20
   4  -4   2  142.59    7.30
  -4  -4  -2  147.09    7.20
   4  -4   2  148.79    7.30
   4  -4   2  145.49    7.30
   4   4   2  144.69    7.30
   4   4   2  141.89    7.20
   4   4   2  140.89    7.30
  -4   4  -2  144.09    7.30
   4   4   2  151.18    7.20
  -5  -4  -2    7.90    1.20
  -5  -4  -2    9.60    1.40
   5  -4   2    7.40    1.20
   5  -4   2    7.50    1.20
   5  -4   2    9.80    1.20
  -5  -4  -2    9.00    1.00
   5  -4   2    8.50    1.30
   5  -4   2    9.60    1.00
   5   4   2   11.70    1.30
  -5   4  -2    7.90    1.00
   5   4   2    9.00    1.00
  -5   4  -2    8.10    1.10
   6  -4   2 1258.47   59.59
   6  -4   2 1237.08   59.69
   6  -4   2 1239.18   59.59
  -6  -4  -2 1266.27   59.59
   6  -4   2 1264.17   59.49
  -6  -4  -2 1254.17   59.39
   6  -4   2 1295.57   59.59
  -6  -4  -2 1228.18   59.69
  -6   4  -2 1248.98   59.49
   6   4   2 1206.18   59.59
  -6   4  -2 1229.98   59.59
   6   4   2 1227.08   59.59
   6   4   2 1298.67   59.49
   6   4   2 1253.27   59.69
   7  -4   2    5.60    1.20
  -7  -4  -2    4.80    1.30
   7  -4   2    4.60    1.30
   7  -4   2    5.60    1.30
  -7  -4  -2    6.70    0.90
   7  -4   2    4.70    1.70
  -7  -4  -2    5.50    1.20
   7  -4   2   -0.80    1.40
   7   4   2    4.60    1.20
   7   4   2    6.50    1.20
  -7   4  -2    5.20    1.30
   7   4   2    5.20    1.30
   7   4   2    7.30    1.00
   8  -4   2    6.10    1.40
   8  -4   2    9.00    1.60
  -8  -4  -2    5.80    1.50
  -8  -4  -2    7.30    1.60
  -8  -4  -2    8.50    1.00
   8  -4   2    7.40    1.50
   8  -4   2    5.50    1.40
  -8   4  -2    9.80    1.60
   8   4   2    9.80    1.50
   8   4   2    9.90    1.20
  -8   4  -2    9.60    1.50
   8   4   2    7.50    1.50
   9  -4   2    7.20    1.90
   9  -4   2    7.50    1.60
  -9  -4  -2    7.00    1.80
  -9  -4  -2   10.30    1.10
   9  -4   2    9.50    1.70
   9  -4   2   11.60    1.70
  -9   4  -2    8.60    1.70
   9   4   2   10.60    1.30
  -9   4  -2    6.90    1.60
   9   4   2   10.30    1.70
   9   4   2    7.60    1.60
 -10  -4  -2    5.40    2.10
  10  -4   2    4.40    1.60
  10  -4   2    8.00    1.60
  10  -4   2    4.80    1.60
 -10  -4  -2    7.50    1.00
  10   4   2    6.50    1.80
  10   4   2    6.00    1.80
 -10   4  -2    5.10    1.80
 -10   4  -2    6.80    1.80
  10   4   2    6.60    1.20
  11  -4   2    7.80    1.80
  11  -4   2    9.60    1.80
  11  -4   2    8.60    1.90
 -11  -4  -2   12.40    2.60
  11   4   2    9.30    2.00
  11   4   2    8.10    1.90
 -11   4  -2    5.60    2.10
  12  -4   2   -0.60    1.80
 -12  -4  -2    3.60    2.60
  12  -4   2    4.00    1.90
 -12   4  -2    4.70    2.30
  12   4   2    2.20    2.10
  12   4   2    1.70    2.10
  13  -4   2    1.00    2.10
  13  -4   2    3.70    2.00
 -13  -4  -2    5.20    3.10
  13   4   2    2.90    2.40
 -13   4  -2    2.30    2.60
  13   4   2    3.10    2.40
 -14  -4  -2   12.80    3.80
  14  -4   2   13.10    2.70
  14   4   2    7.40    2.90
  14   4   2   14.70    3.00
 -14   4  -2   13.50    3.30
  15  -4   2    0.80    3.80
 -15  -4  -2    2.90    4.20
  15  -4   2   -3.60    2.80
  15   4   2    4.00    3.30
  15   4   2   -1.30    3.20
  16  -4   2    8.90    3.60
  16  -4   2   15.10    4.70
 -16  -4  -2   17.60    5.00
  16   4   2    7.50    4.70
 -16   4  -2   16.10    4.60
  16   4   2    3.70    3.90
  16   5  -2    0.90    3.70
 -15  -5   2   13.40    4.50
  15  -5  -2    8.40    3.70
 -15   5   2    7.30    5.00
  15   5  -2    6.90    3.50
  15   5  -2   14.20    3.40
 -14  -5   2   27.60    4.40
  14  -5  -2   25.70    3.30
  14  -5  -2   29.50    3.50
  14  -5  -2   28.00    3.80
 -14   5   2   21.50    3.70
  14   5  -2   29.00    3.80
  14   5  -2   30.30    3.40
 -13  -5   2    4.40    2.20
  13  -5  -2    4.10    2.50
  13  -5  -2   -0.30    2.20
 -13   5   2    0.40    2.50
  13   5  -2    0.60    2.50
  13   5  -2    2.50    2.30
  12  -5  -2   32.00    3.20
  12  -5  -2   33.80    3.20
 -12  -5   2   37.80    3.80
 -12   5   2   40.70    3.60
  12   5  -2   40.50    3.70
  12   5  -2   28.40    3.20
  11  -5  -2   13.50    2.30
 -11  -5   2   11.90    2.50
  11  -5  -2   11.90    2.20
 -11  -5   2   13.10    1.70
  11   5  -2   11.70    2.20
  11   5  -2   14.80    2.10
 -11   5   2   11.70    2.30
  11   5  -2   13.60    2.10
 -10  -5   2    4.00    1.30
 -10  -5   2    2.30    2.00
  10  -5  -2    2.10    1.70
  10  -5  -2    2.60    1.70
  10   5  -2    2.30    1.70
 -10   5   2    1.90    1.80
  10   5  -2    3.60    1.70
  10   5  -2    3.30    1.60
  -9  -5   2   46.40    4.00
  -9  -5   2   47.30    3.10
   9  -5  -2   49.50    3.60
   9  -5  -2   55.69    4.20
  -9  -5   2   45.30    3.30
   9  -5  -2   49.10    3.60
   9   5  -2   47.80    3.40
   9   5  -2   41.90    3.50
  -9   5   2   48.50    3.60
   9   5  -2   49.00    3.60
  -8  -5   2   22.70    2.40
   8  -5  -2   29.60    2.80
   8  -5  -2   22.90    2.20
  -8  -5   2   22.10    2.30
   8  -5  -2   22.40    2.20
   8   5  -2   20.90    2.30
   8   5  -2   21.20    2.00
  -8   5   2   23.20    2.10
   8   5  -2   23.20    2.50
   7  -5  -2    1.80    1.30
   7  -5  -2    1.00    1.30
  -7  -5   2    1.60    1.30
   7  -5  -2    4.20    1.30
  -7  -5   2    2.90    1.20
   7  -5  -2    0.80    1.20
   7   5  -2    1.30    1.10
   7   5  -2    0.60    1.00
   7   5  -2    3.20    1.30
  -7   5   2   -1.40    1.00
   6  -5  -2    1.40    1.10
  -6  -5   2   -0.60    1.10
  -6  -5   2   -0.90    1.10
   6  -5  -2   -0.50    1.00
   6  -5  -2    1.30    1.20
  -6  -5   2   -0.30    1.00
   6  -5  -2    2.80    1.10
   6  -5  -2    4.10    1.60
   6   5  -2    0.50    1.10
  -6   5   2   -0.50    0.90
  -6   5   2    1.20    1.10
   6   5  -2   -0.30    1.30
   6   5  -2    1.60    1.00
   5  -5  -2   44.80    2.80
   5  -5  -2   48.70    3.20
   5  -5  -2   45.50    2.70
  -5  -5   2   47.60    2.80
  -5  -5   2   45.80    2.90
  -5  -5   2   42.70    2.80
   5  -5  -2   45.30    3.00
  -5  -5   2   44.10    2.90
   5  -5  -2   41.80    3.00
   5  -5  -2   44.10    2.70
   5   5  -2   45.50    2.90
   5   5  -2   43.50    2.80
   5   5  -2   43.60    3.10
  -5   5   2   46.70    3.00
   5   5  -2   44.70    2.90
   4  -5  -2  101.49    5.00
   4  -5  -2   97.29    5.30
  -4  -5   2   99.39    5.10
   4  -5  -2   98.19    5.30
   4  -5  -2   99.89    5.30
  -4  -5   2  103.59    5.20
  -4  -5   2  102.79    5.10
   4  -5  -2  100.59    5.00
   4  -5  -2  103.79    5.10
   4   5  -2   95.69    5.10
   4   5  -2   96.49    5.20
  -4   5   2   90.69    5.20
  -4   5   2   96.79    5.10
   4   5  -2   81.69    5.20
   4   5  -2  103.29    5.20
   3  -5  -2  362.96   17.80
   3  -5  -2  346.67   17.80
  -3  -5   2  371.06   17.70
  -3  -5   2  377.66   17.70
   3  -5  -2  373.16   17.60
  -3  -5   2  360.76   17.70
  -3  -5   2  362.46   17.70
   3  -5  -2  365.46   17.60
   3  -5  -2  372.56   17.80
  -3   5   2  364.56   17.80
   3   5  -2  375.76   17.70
   3   5  -2  359.26   17.70
   3   5  -2  370.66   17.70
   3   5  -2  362.86   17.70
  -3   5   2  372.66   17.60
  -2  -5   2   87.29    4.50
   2  -5  -2   88.19    4.70
  -2  -5   2   86.09    4.40
  -2  -5   2   87.99    4.60
  -2  -5   2   82.59    4.60
   2  -5  -2   86.59    4.40
   2  -5  -2   87.09    4.40
  -2   5   2   84.99    4.40
   2   5  -2   81.79    4.50
   2   5  -2   85.79    4.50
  -2   5   2   87.39    4.40
   2   5  -2   85.49    4.60
   2   5  -2   87.19    4.40
   1  -5  -2    0.00    0.90
   1  -5  -2    0.50    0.70
  -1  -5   2   -0.70    0.60
  -1  -5   2    0.30    0.60
  -1  -5   2    1.00    0.90
  -1  -5   2   -0.20    0.90
   1  -5  -2   -0.60    1.00
   1  -5  -2    0.20    0.50
   1   5  -2   -0.20    0.60
   1   5  -2   -0.50    1.00
   1   5  -2    0.80    0.80
  -1   5   2   -0.40    0.60
  -1   5   2   -0.20    0.90
   1   5  -2    1.10    0.80
  -1   5   2    0.70    0.60
   0  -5  -2  174.58    8.70
   0  -5   2  165.68    8.70
   0  -5   2  184.98    8.70
   0  -5  -2  170.88    8.70
   0  -5   2  172.38    8.40
   0  -5   2  176.38    8.50
   0  -5  -2  172.68    8.40
   0  -5  -2  170.98    8.50
   0   5   2  175.38    8.50
   0   5   2  167.08    8.70
   0   5  -2  175.08    8.50
   0   5  -2  172.48    8.70
   0   5   2  169.68    8.40
   0   5  -2  181.78    8.70
   0   5  -2  178.88    8.40
  -1  -5  -2  111.19    5.90
   1  -5   2  112.59    5.90
   1  -5   2  118.09    5.80
   1  -5   2  106.99    6.00
  -1  -5  -2  109.79    5.80
  -1  -5  -2  117.59    5.70
   1  -5   2  115.99    5.60
  -1  -5  -2  115.29    5.90
   1   5   2  117.19    5.70
   1   5   2  116.89    5.80
  -1   5  -2  114.39    6.00
   1   5   2  114.29    6.00
  -1   5  -2  113.89    6.00
  -1   5  -2  116.79    5.80
   1   5   2  120.79    6.00
  -1   5  -2  117.99    5.60
   2  -5   2  141.29    6.80
   2  -5   2  141.19    7.20
  -2  -5  -2  137.89    7.10
  -2  -5  -2  144.79    7.00
  -2  -5  -2  137.59    7.10
   2  -5   2  143.19    7.00
  -2  -5  -2  144.49    7.20
   2  -5   2  143.19    6.80
  -2   5  -2  147.29    7.20
   2   5   2  132.49    6.90
  -2   5  -2  140.09    7.00
   2   5   2  149.19    7.20
   2   5   2  130.49    7.20
   2   5   2  143.59    7.10
   3  -5   2    6.70    1.00
  -3  -5  -2    7.30    1.10
  -3  -5  -2    6.00    1.10
   3  -5   2    8.30    1.30
   3  -5   2    7.40    0.70
   3  -5   2    8.60    0.70
  -3  -5  -2    7.20    1.30
  -3  -5  -2    6.50    0.90
  -3   5  -2    6.70    1.20
  -3   5  -2    6.10    1.00
   3   5   2    6.50    1.20
   3   5   2    7.10    1.10
   3   5   2    9.20    1.00
   4  -5   2   32.50    2.50
   4  -5   2   31.60    1.90
   4  -5   2   34.20    2.40
   4  -5   2   30.50    2.30
  -4  -5  -2   33.70    2.20
  -4  -5  -2   31.70    2.10
  -4  -5  -2   29.30    2.30
  -4  -5  -2   30.10    2.40
   4   5   2   31.50    2.40
   4   5   2   32.60    2.20
   4   5   2   33.50    2.30
   4   5   2   28.40    2.30
  -4   5  -2   31.70    2.40
   5  -5   2    0.60    1.10
  -5  -5  -2   -0.70    0.90
   5  -5   2    0.30    1.00
   5  -5   2   -2.30    1.20
  -5  -5  -2    0.00    1.00
  -5  -5  -2   -0.30    0.80
   5  -5   2    0.20    0.70
  -5   5  -2   -0.40    0.90
   5   5   2    0.40    1.20
   5   5   2   -0.10    1.00
   5   5   2    0.50    0.90
   5   5   2    1.10    0.90
  -6  -5  -2   81.19    4.80
   6  -5   2   84.59    4.50
   6  -5   2   89.59    4.80
   6  -5   2   82.09    4.70
   6  -5   2   81.19    4.80
  -6  -5  -2   84.19    4.50
  -6  -5  -2   81.09    4.60
   6   5   2   89.29    4.60
  -6   5  -2   83.59    4.70
   6   5   2   91.09    5.10
   6   5   2   81.89    4.60
   6   5   2   82.79    4.70
  -7  -5  -2   94.69    5.60
  -7  -5  -2   98.89    5.50
   7  -5   2  103.59    5.40
   7  -5   2   95.89    5.50
   7  -5   2  100.39    5.60
  -7  -5  -2  102.69    5.20
  -7   5  -2  101.79    5.60
  -7   5  -2   98.49    5.40
   7   5   2  105.39    5.40
   7   5   2  100.99    5.50
   7   5   2   99.19    5.40
  -8  -5  -2  128.49    7.10
   8  -5   2  123.79    6.80
  -8  -5  -2  125.69    6.40
   8  -5   2  124.49    6.80
   8  -5   2  134.19    6.90
   8  -5   2  125.19    6.80
   8   5   2  122.59    6.80
   8   5   2  129.49    6.60
  -8   5  -2  135.39    6.80
  -8   5  -2  119.59    6.90
   8   5   2  130.89    6.80
   9  -5   2    4.70    1.60
   9  -5   2    4.30    1.70
  -9  -5  -2    4.20    1.10
   9  -5   2    7.50    1.80
  -9  -5  -2    5.10    2.00
   9  -5   2    5.80    2.00
   9   5   2    4.40    1.40
  -9   5  -2    1.80    1.50
   9   5   2    4.60    1.60
  -9   5  -2    4.70    1.60
   9   5   2    3.50    1.40
  10  -5   2    1.40    1.70
 -10  -5  -2   -0.30    1.10
  10  -5   2   -0.20    1.60
  10  -5   2   -1.30    1.80
 -10  -5  -2    0.40    2.00
  10   5   2    0.70    1.70
  10   5   2   -0.70    1.50
  10   5   2    3.00    1.40
 -10   5  -2   -0.20    1.70
 -10   5  -2    3.70    1.80
 -11  -5  -2    0.80    1.10
 -11  -5  -2   -2.80    2.10
  11  -5   2    3.50    1.80
  11  -5   2   -1.00    2.00
  11  -5   2    5.90    1.90
  11   5   2    0.30    1.80
 -11   5  -2   -0.40    1.90
  11   5   2   -0.30    1.90
 -11   5  -2   -0.40    2.00
  12  -5   2    1.60    2.10
 -12  -5  -2   -2.40    2.70
  12  -5   2    3.90    2.10
  12   5   2    0.90    2.00
  12   5   2    0.50    2.10
 -12   5  -2   -1.50    2.30
  13  -5   2    6.40    2.30
  13  -5   2    0.90    2.20
 -13  -5  -2   -0.60    3.00
 -13   5  -2    1.10    2.60
  13   5   2    2.20    2.60
  13   5   2    1.80    2.50
 -14  -5  -2    0.20    3.70
  14  -5   2   -1.20    3.00
  14  -5   2   -2.60    2.50
 -14   5  -2    3.10    3.10
  14   5   2   -0.40    2.80
  14   5   2   -0.40    2.70
  15  -5   2   -1.70    2.90
 -15  -5  -2   -4.40    4.10
  15   5   2   -5.80    3.20
 -15   5  -2   -1.00    4.10
  15   5   2    5.20    3.40
  15  -6  -2    5.80    3.20
  15  -6  -2    2.20    3.90
 -15  -6   2    2.50    4.50
  15   6  -2    0.00    3.60
  15   6  -2    6.20    3.30
 -14  -6   2    0.10    3.80
  14  -6  -2    2.10    2.90
  14  -6  -2    2.40    3.00
  14   6  -2    4.20    3.00
  14   6  -2    3.20    3.00
 -13  -6   2   10.40    2.40
  13  -6  -2    8.50    2.80
  13  -6  -2    9.60    2.70
 -13  -6   2    4.70    3.30
  13   6  -2    6.30    2.80
  13   6  -2    7.10    2.60
 -12  -6   2    2.00    2.80
  12  -6  -2   -3.60    2.30
 -12  -6   2    1.80    1.70
  12  -6  -2   -2.30    2.00
  12   6  -2   -1.90    2.10
  12   6  -2    3.30    2.20
  11  -6  -2   24.60    2.90
 -11  -6   2   26.40    3.20
 -11  -6   2   22.70    2.10
  11  -6  -2   28.50    2.90
  11   6  -2   22.50    2.70
  11   6  -2   27.40    2.80
  10  -6  -2   13.80    2.20
  10  -6  -2   20.20    2.50
 -10  -6   2   15.70    1.80
 -10  -6   2   18.70    2.80
  10   6  -2   15.20    2.20
  10   6  -2   17.20    2.40
  10   6  -2   16.20    2.30
   9  -6  -2   10.30    2.00
  -9  -6   2   11.20    2.10
  -9  -6   2    9.10    1.50
   9   6  -2    9.60    2.00
  -9   6   2   11.20    1.80
   9   6  -2   11.40    1.80
   9   6  -2    8.80    1.90
   8  -6  -2    2.20    1.70
   8  -6  -2    4.20    1.60
  -8  -6   2    2.80    1.20
  -8  -6   2    1.30    1.40
  -8  -6   2    3.10    1.60
   8   6  -2    2.50    1.50
   8   6  -2    5.10    1.70
   8   6  -2    5.30    1.50
  -8   6   2    3.90    1.40
  -7  -6   2   65.29    4.40
   7  -6  -2   63.99    4.10
   7  -6  -2   64.09    4.30
  -7  -6   2   65.99    4.00
  -7  -6   2   69.69    3.90
   7  -6  -2   68.09    4.20
   7  -6  -2   62.99    3.90
   7   6  -2   70.89    4.10
  -7   6   2   63.29    4.00
   7   6  -2   66.09    4.10
   7   6  -2   71.99    4.20
   6  -6  -2   16.60    1.70
   6  -6  -2   16.60    1.70
  -6  -6   2   12.80    1.70
  -6  -6   2   11.10    1.90
   6  -6  -2   15.40    1.90
  -6  -6   2   14.50    1.50
   6  -6  -2   15.90    1.80
  -6  -6   2   12.60    1.60
   6   6  -2   16.80    1.80
  -6   6   2   16.20    1.80
   6   6  -2   14.10    1.60
  -6   6   2   15.80    1.60
   6   6  -2   15.80    1.70
   5  -6  -2   20.10    1.90
   5  -6  -2   16.40    1.60
  -5  -6   2   22.10    2.00
  -5  -6   2   20.60    2.10
  -5  -6   2   20.00    1.70
  -5  -6   2   18.90    1.90
   5  -6  -2   14.20    1.90
   5  -6  -2   14.50    2.10
   5  -6  -2   19.30    1.60
   5  -6  -2   17.00    1.90
   5   6  -2   19.80    1.70
  -5   6   2   20.10    2.00
   5   6  -2   21.60    1.90
   5   6  -2   18.50    1.80
   5   6  -2   18.20    1.80
  -5   6   2   19.00    1.60
   4  -6  -2  118.99    5.80
   4  -6  -2  115.79    5.80
  -4  -6   2  118.39    6.00
   4  -6  -2  110.59    6.10
   4  -6  -2  115.09    5.70
   4  -6  -2  110.79    6.10
  -4  -6   2  112.49    6.00
   4  -6  -2  112.49    6.20
  -4  -6   2  115.09    5.90
  -4  -6   2  111.29    6.00
   4   6  -2  107.19    5.90
  -4   6   2  113.89    6.10
   4   6  -2  115.69    5.90
   4   6  -2  112.19    6.10
  -4   6   2  114.59    5.80
   4   6  -2  111.39    6.00
  -3  -6   2   17.10    1.80
  -3  -6   2   17.20    1.90
   3  -6  -2   15.10    1.50
   3  -6  -2   16.00    1.40
   3  -6  -2   13.50    1.70
   3  -6  -2   20.50    1.90
   3  -6  -2   18.70    1.80
  -3  -6   2   17.10    1.50
  -3  -6   2   17.90    1.90
  -3   6   2   19.30    1.80
   3   6  -2   19.90    1.60
   3   6  -2   14.50    1.60
   3   6  -2   15.00    1.50
   3   6  -2   19.10    1.70
  -3   6   2   16.00    1.50
   2  -6  -2    8.50    1.00
  -2  -6   2    9.60    1.10
   2  -6  -2    6.90    1.40
  -2  -6   2    7.70    1.20
   2  -6  -2    7.30    0.90
  -2  -6   2   12.60    1.50
  -2  -6   2    8.90    1.10
   2  -6  -2    5.70    1.20
   2   6  -2   11.80    1.50
  -2   6   2    9.00    1.00
  -2   6   2    6.50    1.30
  -2   6   2    8.30    0.90
   2   6  -2   10.40    1.10
   2   6  -2    7.40    1.20
   2   6  -2    6.40    1.00
  -1  -6   2   33.80    2.10
   1  -6  -2   28.60    2.40
  -1  -6   2   29.80    2.30
  -1  -6   2   30.10    1.90
   1  -6  -2   31.00    1.90
  -1  -6   2   29.30    2.40
   1  -6  -2   31.90    1.90
   1  -6  -2   27.40    2.40
   1   6  -2   29.90    2.00
   1   6  -2   27.70    2.10
  -1   6   2   30.60    2.40
   1   6  -2   30.50    2.60
  -1   6   2   30.20    1.90
  -1   6   2   33.20    2.00
   1   6  -2   31.60    2.40
   0  -6   2   10.20    1.40
   0  -6  -2    7.70    1.20
   0  -6   2    9.50    1.00
   0  -6  -2    6.40    1.30
   0  -6  -2    7.70    1.00
   0  -6   2    8.60    1.30
   0  -6  -2    8.30    0.90
   0  -6   2    9.30    0.90
   0   6  -2   11.20    1.50
   0   6   2    8.20    0.90
   0   6  -2    8.50    1.00
   0   6  -2    9.20    1.10
   0   6  -2    6.70    1.10
   0   6   2    8.10    1.40
   0   6   2    9.50    1.10
   1  -6   2  369.36   18.60
  -1  -6  -2  393.66   18.40
  -1  -6  -2  389.36   18.60
  -1  -6  -2  384.26   18.40
   1  -6   2  396.16   18.40
   1  -6   2  384.96   18.60
   1  -6   2  381.06   18.30
  -1  -6  -2  369.06   18.60
  -1   6  -2  377.56   18.60
   1   6   2  387.96   18.60
  -1   6  -2  385.16   18.30
  -1   6  -2  370.36   18.40
   1   6   2  378.56   18.60
  -1   6  -2  386.16   18.60
   1   6   2  379.26   18.40
   1   6   2  396.66   18.40
   2  -6   2   31.10    2.50
  -2  -6  -2   33.50    2.00
  -2  -6  -2   28.60    2.40
   2  -6   2   30.00    1.70
   2  -6   2   28.50    2.40
   2  -6   2   29.50    2.10
  -2  -6  -2   32.00    2.40
  -2  -6  -2   30.50    2.20
  -2   6  -2   38.40    2.60
   2   6   2   30.60    2.30
   2   6   2   30.70    2.50
   2   6   2   27.40    2.10
  -2   6  -2   29.40    2.40
  -2   6  -2   30.20    2.10
   2   6   2   29.90    1.90
   3  -6   2  497.65   23.40
   3  -6   2  490.95   23.50
   3  -6   2  478.95   23.80
  -3  -6  -2  504.65   23.60
  -3  -6  -2  483.25   23.70
   3  -6   2  476.05   23.80
  -3  -6  -2  495.35   23.80
  -3  -6  -2  491.25   23.70
   3  -6   2  494.95   23.60
   3   6   2  514.35   23.70
  -3   6  -2  485.35   23.80
   3   6   2  490.65   23.60
   3   6   2  500.85   23.80
   3   6   2  485.55   23.80
   4  -6   2    2.60    1.30
   4  -6   2   -0.30    0.90
   4  -6   2    0.70    0.60
  -4  -6  -2    1.50    1.00
  -4  -6  -2   -0.30    0.90
  -4  -6  -2    0.00    0.90
   4  -6   2    0.20    1.10
  -4  -6  -2    0.60    1.10
   4   6   2    0.90    1.00
   4   6   2    0.00    1.10
  -4   6  -2   -2.00    0.90
  -4   6  -2    0.20    0.90
   4   6   2    0.90    1.10
  -5  -6  -2  128.29    6.80
  -5  -6  -2  124.99    6.70
   5  -6   2  128.39    6.80
  -5  -6  -2  129.39    6.60
   5  -6   2  135.69    6.40
   5  -6   2  131.89    6.40
   5  -6   2  130.79    6.70
  -5  -6  -2  118.89    6.70
   5   6   2  137.09    6.70
   5   6   2  128.99    6.60
   5   6   2  121.39    6.70
  -5   6  -2  125.09    6.80
  -5   6  -2  125.99    6.70
   5   6   2  124.59    6.80
   6  -6   2    1.90    1.00
  -6  -6  -2    1.60    1.30
   6  -6   2    0.70    1.30
  -6  -6  -2    2.30    1.40
   6  -6   2    4.80    1.60
   6  -6   2    1.80    1.30
   6   6   2    3.20    1.20
  -6   6  -2    2.40    1.20
   6   6   2    0.50    1.10
   6   6   2    1.60    1.30
   7  -6   2   35.30    2.70
   7  -6   2   34.00    3.30
   7  -6   2   40.90    3.10
  -7  -6  -2   32.60    3.10
   7   6   2   30.20    2.90
   7   6   2   39.20    2.90
   7   6   2   40.50    3.00
  -7   6  -2   33.30    3.00
  -8  -6  -2    5.80    1.90
   8  -6   2    6.10    1.70
   8  -6   2    9.10    1.70
   8  -6   2    4.40    1.60
  -8   6  -2    4.30    1.60
   8   6   2    4.70    1.60
   8   6   2    4.20    1.60
   8   6   2    6.00    1.60
  -9  -6  -2    3.30    2.10
   9  -6   2    4.20    1.80
   9  -6   2    6.90    2.00
  -9  -6  -2    5.40    2.00
   9  -6   2    4.20    1.70
  -9   6  -2    3.20    1.70
   9   6   2    3.80    1.60
   9   6   2    4.20    1.70
   9   6   2    4.20    1.70
  10  -6   2    0.20    1.80
  10  -6   2    1.00    1.80
 -10  -6  -2   -1.70    2.00
 -10  -6  -2   -0.40    1.30
 -10   6  -2    2.00    1.80
  10   6   2    1.40    1.70
  10   6   2   -3.10    1.80
  10   6   2    1.60    1.80
  11  -6   2    2.90    2.10
  11  -6   2    2.00    2.10
 -11  -6  -2   -0.40    2.50
 -11  -6  -2   -1.20    1.30
 -11   6  -2   -2.90    2.00
  11   6   2    0.50    2.10
  11   6   2   -2.30    1.90
 -11   6  -2    1.10    1.90
  12  -6   2   21.30    2.90
 -12  -6  -2   27.20    3.70
  12  -6   2   18.60    2.90
 -12   6  -2   18.80    3.00
  12   6   2   28.90    3.20
  12   6   2   22.40    2.80
  13  -6   2    0.60    2.60
  13  -6   2    4.80    2.60
 -13  -6  -2   -1.80    3.20
 -13   6  -2   -0.50    2.70
  13   6   2    3.00    4.30
  13   6   2    2.80    2.80
  14  -6   2   -8.60    2.70
 -14  -6  -2    0.30    3.80
  14  -6   2   -2.30    2.80
  14   6   2   -0.40    3.20
  14   6   2   -0.10    3.00
  15  -6   2    0.90    3.00
 -15  -6  -2    3.30    4.80
  15   6   2    6.00    3.80
  15   6   2    6.80    3.60
  15  -7  -2   47.50    4.80
  15  -7  -2   54.79    5.50
 -15  -7   2   57.89    6.30
  15   7  -2   58.99    6.20
  15   7  -2   48.00    5.10
  14  -7  -2    4.40    3.50
 -14  -7   2    5.60    4.10
  14  -7  -2   11.10    3.30
  14   7  -2    7.10    3.30
  14   7  -2   12.10    3.30
 -13  -7   2    0.40    3.50
  13  -7  -2    1.00    3.10
  13  -7  -2    0.50    2.80
  13   7  -2   -3.80    2.70
  13   7  -2    4.40    2.90
  12  -7  -2   -1.00    2.70
 -12  -7   2    1.00    5.60
  12  -7  -2    6.00    2.40
 -12  -7   2   -0.20    1.80
  12   7  -2    0.80    2.30
  12   7  -2    1.50    2.40
  11  -7  -2   -4.10    2.30
 -11  -7   2    0.50    1.60
 -11  -7   2    1.80    2.50
  11  -7  -2    1.00    2.20
  11   7  -2   -1.10    2.10
  11   7  -2    0.70    2.00
  10  -7  -2    4.20    2.30
 -10  -7   2    1.90    1.50
  10  -7  -2    4.90    2.10
 -10  -7   2   -1.40    2.10
  10   7  -2    3.40    1.80
  10   7  -2    2.00    1.90
  10   7  -2   -2.60    2.90
 -10   7   2    3.60    1.80
  -9  -7   2  104.19    5.70
  -9  -7   2  106.79    6.40
   9  -7  -2   94.79    5.80
   9  -7  -2  107.79    6.30
   9   7  -2  105.69    6.10
   9   7  -2  102.69    6.00
  -9   7   2   95.49    6.00
   9   7  -2  106.09    6.30
   8  -7  -2    2.10    1.80
   8  -7  -2    2.20    1.80
   8  -7  -2   -1.70    1.20
  -8  -7   2    0.20    1.60
  -8  -7   2    0.00    1.20
  -8   7   2   -2.50    1.20
   8   7  -2   -1.90    1.40
   8   7  -2   -1.70    2.00
   8   7  -2   -0.20    1.60
   7  -7  -2    0.80    1.60
  -7  -7   2   -0.20    1.20
   7  -7  -2    2.60    1.50
   7  -7  -2    0.60    1.20
  -7  -7   2   -1.50    1.50
  -7   7   2    0.00    1.60
   7   7  -2    1.50    1.80
   7   7  -2    1.00    1.30
   7   7  -2   -0.70    1.50
  -7   7   2   -0.60    1.30
   6  -7  -2   11.10    1.60
  -6  -7   2   10.10    1.60
  -6  -7   2    9.70    1.50
   6  -7  -2   10.90    1.60
   6  -7  -2    6.30    1.70
  -6  -7   2    7.70    1.60
   6   7  -2   10.80    1.70
   6   7  -2    6.50    1.40
  -6   7   2   10.50    1.90
   6   7  -2    7.70    1.90
  -6   7   2    8.70    1.40
   5  -7  -2   65.59    3.80
   5  -7  -2   60.89    3.50
   5  -7  -2   60.09    4.10
   5  -7  -2   65.99    3.60
  -5  -7   2   64.49    3.90
  -5  -7   2   57.49    3.80
  -5  -7   2   56.39    3.80
  -5  -7   2   63.79    3.80
   5   7  -2   62.79    3.90
   5   7  -2   62.89    3.70
  -5   7   2   58.59    3.60
  -5   7   2   60.19    4.00
   5   7  -2   61.19    4.10
   5   7  -2   63.59    3.90
  -4  -7   2   27.40    2.40
   4  -7  -2   26.80    2.00
  -4  -7   2   25.70    2.30
   4  -7  -2   26.90    2.10
   4  -7  -2   27.40    2.20
  -4  -7   2   32.50    2.60
   4  -7  -2   27.40    2.70
  -4  -7   2   28.40    2.40
   4   7  -2   25.60    2.80
   4   7  -2   26.20    2.40
   4   7  -2   29.80    2.20
   4   7  -2   27.80    2.40
  -4   7   2   32.70    2.70
   3  -7  -2   14.30    1.80
   3  -7  -2   15.60    1.70
   3  -7  -2   19.30    1.60
  -3  -7   2   20.60    2.00
  -3  -7   2   24.80    2.00
  -3  -7   2   18.30    1.80
  -3   7   2   16.30    1.50
  -3   7   2   20.00    2.20
   3   7  -2   14.10    1.90
   3   7  -2   16.70    1.60
   3   7  -2   19.70    2.00
   3   7  -2   17.70    1.80
   2  -7  -2    0.40    1.30
  -2  -7   2   -0.60    1.30
  -2  -7   2    0.00    1.00
   2  -7  -2    0.80    0.70
  -2  -7   2    2.00    0.80
  -2  -7   2    0.90    1.00
   2  -7  -2    1.20    0.80
   2  -7  -2    0.10    1.20
   2   7  -2    2.10    0.90
  -2   7   2    1.40    0.80
   2   7  -2    1.40    1.20
  -2   7   2    2.00    0.80
   2   7  -2    2.30    0.90
  -2   7   2    0.00    1.10
   2   7  -2   -0.40    1.40
   1  -7  -2   79.79    4.60
   1  -7  -2   73.49    4.00
  -1  -7   2   81.59    4.20
  -1  -7   2   74.59    4.40
  -1  -7   2   74.99    4.00
  -1  -7   2   72.49    4.50
   1  -7  -2   69.89    4.40
   1  -7  -2   82.09    4.00
   1   7  -2   77.29    4.00
  -1   7   2   78.49    4.10
  -1   7   2   79.89    4.10
   1   7  -2   78.49    4.50
  -1   7   2   75.29    4.40
   1   7  -2   83.19    4.70
   0  -7   2   26.80    2.10
   0  -7   2   30.10    1.80
   0  -7   2   27.40    2.50
   0  -7   2   27.40    2.50
   0  -7  -2   27.10    2.00
   0  -7  -2   26.70    2.40
   0  -7  -2   27.90    2.60
   0  -7  -2   28.90    1.90
   0   7   2   28.10    2.40
   0   7  -2   28.80    1.80
   0   7   2   27.90    2.10
   0   7  -2   29.50    2.80
   0   7   2   27.50    1.90
   0   7  -2   31.40    2.40
  -1  -7  -2    5.40    1.50
  -1  -7  -2    4.70    1.00
  -1  -7  -2    3.40    1.30
   1  -7   2    2.70    0.90
   1  -7   2    3.20    1.40
   1  -7   2    3.90    0.70
   1  -7   2    3.70    1.20
  -1  -7  -2    4.20    0.80
  -1   7  -2    1.90    1.10
  -1   7  -2    3.60    1.40
   1   7   2    5.10    0.80
   1   7   2    5.40    1.30
   1   7   2    5.30    1.10
  -2  -7  -2   57.89    3.80
   2  -7   2   58.49    3.90
  -2  -7  -2   57.79    3.70
   2  -7   2   56.09    3.70
   2  -7   2   60.19    3.40
  -2  -7  -2   65.89    3.30
   2  -7   2   60.19    3.00
  -2  -7  -2   53.09    3.50
   2   7   2   58.69    3.60
   2   7   2   59.59    3.30
  -2   7  -2   54.19    3.90
  -2   7  -2   61.59    3.40
   2   7   2   59.99    3.90
  -2   7  -2   54.29    3.60
   2   7   2   59.19    3.50
   3  -7   2   10.40    1.30
  -3  -7  -2    6.50    1.60
   3  -7   2   10.10    1.10
   3  -7   2   11.40    1.60
  -3  -7  -2   10.40    1.40
   3  -7   2   11.40    0.90
  -3  -7  -2   11.90    1.50
  -3  -7  -2   11.70    1.30
   3   7   2   10.90    1.70
   3   7   2   11.30    1.40
   3   7   2   11.00    1.20
  -3   7  -2   10.50    1.30
  -3   7  -2    9.60    1.60
   3   7   2   11.90    1.70
  -4  -7  -2   18.50    1.80
  -4  -7  -2   21.40    1.90
   4  -7   2   15.70    1.60
  -4  -7  -2   16.10    1.60
   4  -7   2   19.90    1.40
   4  -7   2   21.60    2.10
  -4  -7  -2   23.10    2.30
  -4   7  -2   18.10    2.00
   4   7   2   21.80    2.30
   4   7   2   21.40    1.90
  -4   7  -2   15.40    1.60
   4   7   2   22.50    2.10
   4   7   2   20.20    2.00
  -5  -7  -2  672.73   32.80
  -5  -7  -2  674.23   32.90
   5  -7   2  689.63   32.60
   5  -7   2  658.73   32.80
   5  -7   2  710.13   32.60
  -5  -7  -2  683.43   32.80
   5  -7   2  680.93   33.00
   5   7   2  705.43   32.90
   5   7   2  690.53   32.80
  -5   7  -2  663.23   33.00
   5   7   2  686.33   33.00
  -5   7  -2  682.13   32.80
  -6  -7  -2   71.59    4.20
   6  -7   2   72.39    4.00
   6  -7   2   71.29    3.90
  -6  -7  -2   72.19    4.60
   6  -7   2   75.99    4.60
   6   7   2   73.99    4.20
   6   7   2   73.59    4.50
   6   7   2   64.89    4.50
  -6   7  -2   70.19    4.40
  -7  -7  -2   28.60    2.60
   7  -7   2   30.30    2.60
   7  -7   2   29.10    2.60
   7  -7   2   27.20    2.30
  -7  -7  -2   27.30    2.70
   7   7   2   32.90    3.20
   7   7   2   27.50    2.60
   7   7   2   28.70    2.70
  -7   7  -2   26.80    2.50
  -8  -7  -2    0.20    1.70
   8  -7   2    4.30    1.80
  -8  -7  -2    1.00    1.20
   8  -7   2    4.20    1.60
   8  -7   2   -2.40    1.20
   8   7   2   -3.70    1.80
   8   7   2   -1.00    1.50
   8   7   2   -1.00    1.60
  -8   7  -2    3.00    1.50
   9  -7   2    0.60    1.90
   9  -7   2   -0.30    1.90
  -9  -7  -2    0.60    1.30
   9  -7   2   -1.00    1.90
  -9  -7  -2   -0.10    2.00
   9   7   2   -0.40    1.50
   9   7   2   -0.30    1.80
  -9   7  -2    2.20    1.60
   9   7   2    1.00    2.00
  10  -7   2    5.30    2.20
 -10  -7  -2    5.40    1.50
 -10  -7  -2    3.10    2.20
  10  -7   2    6.90    2.30
  10   7   2    4.50    2.00
  10   7   2    8.90    2.20
 -10   7  -2   10.40    2.20
  11  -7   2   18.40    2.80
 -11  -7  -2   23.40    3.30
 -11  -7  -2   18.80    2.00
  11  -7   2   15.30    3.10
 -11   7  -2   21.70    2.90
  11   7   2   22.00    2.90
  11   7   2   22.80    2.70
  12  -7   2    2.50    2.70
  12  -7   2   -2.00    2.40
 -12  -7  -2    4.10    3.30
  12   7   2    3.60    2.70
  12   7   2    0.70    2.30
 -12   7  -2    1.00    2.40
  13  -7   2    1.30    2.80
 -13  -7  -2    4.00    3.60
  13  -7   2    4.10    2.90
  13   7   2    7.40    3.20
  13   7   2    4.30    2.70
  14  -7   2   -4.30    3.10
  14  -7   2   -3.10    3.10
 -14  -7  -2    4.70    4.30
  14   7   2    6.40    3.40
  14   7   2   -2.10    2.90
  14  -8  -2    2.60    3.40
  14  -8  -2    0.50    2.90
 -14  -8   2  -10.20    4.20
  14  -8  -2    7.80    3.90
  14   8  -2    4.40    3.40
  14   8  -2    7.40    3.80
  13  -8  -2    4.00    3.40
 -13  -8   2    7.80    3.80
  13  -8  -2    5.40    3.00
  13  -8  -2    0.50    2.60
  13   8  -2   -0.10    3.20
  13   8  -2   -0.60    3.00
  12  -8  -2    1.00    2.20
  12  -8  -2   -2.40    2.70
  12  -8  -2   -3.70    2.80
 -12  -8   2   -0.40    2.10
 -12  -8   2   -2.20    3.10
  12   8  -2   -4.30    2.80
  11  -8  -2   -0.80    2.30
  11  -8  -2    4.00    2.70
  11  -8  -2    3.10    2.00
 -11  -8   2    0.50    2.70
 -11  -8   2   -1.20    1.80
  11   8  -2   -3.50    2.00
  11   8  -2    4.10    2.50
 -10  -8   2    4.10    2.50
 -10  -8   2    3.20    1.70
  10  -8  -2    6.00    1.80
  10  -8  -2    4.60    2.50
  10   8  -2    2.60    2.30
 -10   8   2    6.60    2.10
  10   8  -2    0.40    2.00
   9  -8  -2   -0.50    2.20
  -9  -8   2    2.40    1.60
  -9  -8   2    0.60    2.10
   9  -8  -2    3.00    1.50
   9   8  -2   -0.80    1.60
  -9   8   2    4.00    1.80
   9   8  -2    4.10    2.10
   8  -8  -2    0.40    1.90
  -8  -8   2    2.50    1.90
   8  -8  -2    2.80    2.00
  -8  -8   2    0.00    1.40
   8  -8  -2    0.00    1.30
  -8   8   2    0.00    1.50
   8   8  -2   -2.00    1.40
   8   8  -2    0.20    1.80
  -7  -8   2    3.10    1.80
   7  -8  -2    2.60    1.20
   7  -8  -2    4.90    1.70
  -7  -8   2    3.00    1.40
   7  -8  -2    1.60    1.90
  -7   8   2   -1.10    1.30
   7   8  -2   -1.30    1.60
  -7   8   2    1.80    1.90
   7   8  -2    2.50    1.50
  -6  -8   2   42.90    3.70
  -6  -8   2   52.39    3.60
   6  -8  -2   53.49    3.70
   6  -8  -2   45.50    3.20
   6  -8  -2   51.89    3.50
   6  -8  -2   48.10    3.90
  -6   8   2   50.39    3.90
  -6   8   2   52.09    3.40
   6   8  -2   51.19    3.50
   6   8  -2   53.49    3.80
   5  -8  -2  107.09    5.80
   5  -8  -2  108.49    5.60
   5  -8  -2  105.99    5.70
  -5  -8   2  107.79    5.90
   5  -8  -2  107.49    6.10
  -5  -8   2  105.59    5.90
  -5   8   2  106.89    5.70
  -5   8   2  109.99    6.20
   5   8  -2  102.29    6.00
   5   8  -2  105.59    5.80
   4  -8  -2  487.45   23.30
   4  -8  -2  495.85   23.20
   4  -8  -2  470.75   23.60
   4  -8  -2  490.45   23.20
  -4  -8   2  462.25   23.40
  -4  -8   2  490.25   23.40
  -4  -8   2  485.05   23.50
   4   8  -2  474.05   23.30
   4   8  -2  470.45   23.50
  -4   8   2  498.95   23.30
  -4   8   2  489.15   23.60
   4   8  -2  481.55   23.40
  -3  -8   2   -1.20    1.20
  -3  -8   2    1.70    1.20
   3  -8  -2   -0.80    0.90
   3  -8  -2    0.30    1.40
  -3  -8   2    0.30    1.10
   3  -8  -2   -0.90    0.80
  -3   8   2   -1.70    1.30
   3   8  -2    0.30    0.90
   3   8  -2    0.20    1.40
   3   8  -2   -1.00    1.10
  -2  -8   2    0.20    1.00
  -2  -8   2    0.60    1.20
   2  -8  -2   -1.00    0.90
   2  -8  -2   -0.40    0.80
  -2  -8   2    1.40    1.10
   2  -8  -2    2.60    1.30
  -2   8   2    0.60    0.90
  -2   8   2   -0.30    0.90
   2   8  -2   -0.70    1.00
   2   8  -2    1.20    1.00
   2   8  -2    0.00    1.30
  -2   8   2    2.00    1.30
  -1  -8   2   16.60    1.90
  -1  -8   2   14.00    1.50
   1  -8  -2   14.80    1.50
   1  -8  -2   14.00    1.90
   1  -8  -2   15.60    1.60
  -1  -8   2   15.50    1.30
   1   8  -2   14.40    1.40
  -1   8   2   14.50    1.80
   1   8  -2    9.70    1.50
  -1   8   2   12.50    1.30
  -1   8   2   12.90    1.40
   1   8  -2   15.10    1.60
   0  -8  -2   -1.60    1.30
   0  -8  -2    0.30    0.80
   0  -8   2    1.30    0.80
   0  -8  -2    1.10    0.90
   0  -8   2   -0.30    1.10
   0  -8   2    0.00    1.00
   0   8   2    0.50    0.90
   0   8   2    0.60    1.00
   0   8  -2    1.60    1.40
   0   8  -2   -0.60    0.90
   0   8   2    0.50    1.40
   0   8  -2   -0.80    0.80
   1  -8   2    3.60    1.10
  -1  -8  -2    1.00    0.90
   1  -8   2    1.40    1.30
  -1  -8  -2    4.20    1.40
   1  -8   2    2.20    0.70
  -1  -8  -2    2.90    1.30
   1   8   2    1.60    1.30
   1   8   2    1.70    1.00
  -1   8  -2    0.70    1.30
  -1   8  -2    4.20    1.00
  -1   8  -2    2.30    0.70
   1   8   2    0.70    1.10
   2  -8   2   24.30    2.30
   2  -8   2   26.00    1.70
   2  -8   2   25.40    2.20
  -2  -8  -2   24.20    2.60
  -2  -8  -2   27.20    2.20
  -2  -8  -2   26.80    2.30
  -2   8  -2   23.10    2.60
   2   8   2   24.90    2.40
   2   8   2   25.90    2.60
  -2   8  -2   26.10    2.10
   3  -8   2    5.00    0.80
  -3  -8  -2    4.80    1.40
  -3  -8  -2    3.10    1.20
   3  -8   2    4.20    1.10
   3  -8   2    3.10    1.50
   3  -8   2    6.70    1.30
  -3  -8  -2    4.50    1.20
   3   8   2    4.50    1.40
  -3   8  -2    4.90    1.10
  -3   8  -2    3.30    1.40
   3   8   2    1.60    1.30
   3   8   2    2.90    1.10
   4  -8   2   51.69    3.90
   4  -8   2   53.19    2.90
  -4  -8  -2   58.69    3.70
  -4  -8  -2   56.59    3.40
  -4  -8  -2   55.89    3.60
   4  -8   2   50.69    3.50
   4   8   2   53.99    3.80
   4   8   2   47.90    3.30
  -4   8  -2   56.79    3.50
  -4   8  -2   53.19    3.80
  -5  -8  -2  102.59    5.80
   5  -8   2  102.99    6.00
   5  -8   2  103.59    5.20
   5  -8   2  103.19    5.10
  -5  -8  -2  100.89    5.60
  -5  -8  -2   97.49    5.70
   5   8   2  100.69    5.90
  -5   8  -2   99.39    5.90
   5   8   2  102.79    5.50
  -5   8  -2  100.79    5.60
   6  -8   2   56.39    3.40
   6  -8   2   54.59    3.20
  -6  -8  -2   57.49    4.20
  -6  -8  -2   58.99    3.80
   6  -8   2   59.79    4.20
  -6   8  -2   53.79    4.20
  -6   8  -2   57.39    3.80
   6   8   2   51.69    3.60
   6   8   2   56.69    4.10
   7  -8   2   -1.50    1.10
   7  -8   2    1.70    1.90
  -7  -8  -2    1.30    1.70
  -7  -8  -2    0.10    1.30
   7  -8   2   -0.60    1.30
   7   8   2   -1.30    1.80
   7   8   2   -2.80    1.20
  -7   8  -2   -0.80    1.40
  -8  -8  -2   26.90    2.80
   8  -8   2   29.20    2.50
   8  -8   2   26.00    2.50
   8  -8   2   31.20    3.00
  -8  -8  -2   30.60    3.10
   8   8   2   28.80    3.00
   8   8   2   20.40    2.40
  -8   8  -2   25.60    2.60
   9  -8   2    1.40    1.40
  -9  -8  -2    0.40    1.50
   9  -8   2   -0.20    2.00
   9  -8   2    2.40    2.10
  -9  -8  -2   -0.40    2.10
  -9   8  -2    3.70    1.90
   9   8   2    2.20    2.10
   9   8   2    1.70    1.70
  10  -8   2    5.10    1.70
  10  -8   2    4.30    2.40
 -10  -8  -2    5.80    2.70
 -10  -8  -2    4.10    1.70
  10  -8   2    8.60    2.60
  10   8   2   10.40    2.50
  10   8   2    4.70    2.10
 -10   8  -2    3.20    2.00
  11  -8   2    8.20    2.00
 -11  -8  -2   15.40    2.10
  11  -8   2    9.20    2.80
  11  -8   2    7.50    2.60
 -11  -8  -2   13.60    3.30
  11   8   2    8.90    2.40
  11   8   2   10.10    2.90
 -11   8  -2   10.10    2.50
  12  -8   2    2.30    2.90
 -12  -8  -2    4.10    3.50
  12  -8   2    3.50    2.10
  12  -8   2    2.10    2.80
  12   8   2    3.50    2.70
  12   8   2    8.40    3.20
 -13  -8  -2    1.10    3.70
  13  -8   2   -0.40    3.00
  13  -8   2   -5.70    3.10
  13   8   2    0.70    2.90
  13   8   2   -2.30    3.40
 -14  -8  -2   -2.90    4.60
  14  -8   2    5.70    3.60
  14  -8   2    0.50    3.40
  14   8   2    3.90    3.50
  14   8   2    2.40    5.00
 -13  -9   2    5.20    3.90
  13  -9  -2   -2.60    2.50
  13  -9  -2   -2.20    3.80
  13  -9  -2   -1.20    3.50
  13   9  -2    3.30    3.50
  13   9  -2    0.20    3.00
  12  -9  -2   10.60    3.40
  12  -9  -2    2.80    2.30
 -12  -9   2    7.50    2.40
  12  -9  -2    8.60    3.60
 -12  -9   2    6.10    3.50
  12   9  -2    6.10    3.10
  12   9  -2    8.20    3.20
  11  -9  -2    2.50    2.00
 -11  -9   2    2.40    2.20
  11  -9  -2    2.90    3.00
  11   9  -2    3.70    2.80
  11   9  -2    2.30    2.50
 -10  -9   2    0.20    2.50
  10  -9  -2    0.70    1.80
  10  -9  -2    1.80    2.80
 -10  -9   2    2.80    2.00
  10   9  -2    1.50    2.50
  10   9  -2    0.40    2.00
 -10   9   2    1.70    2.10
  -9  -9   2   -1.10    1.80
  -9  -9   2    6.60    2.30
   9  -9  -2    1.90    1.60
   9  -9  -2    6.00    2.50
  -9   9   2    2.80    2.00
   9   9  -2    3.10    2.30
   9   9  -2    1.90    1.90
  -8  -9   2   -2.00    1.60
   8  -9  -2   -1.20    1.40
  -8  -9   2    0.70    1.90
   8  -9  -2    1.80    2.20
   8  -9  -2    5.00    2.20
   8   9  -2   -3.10    1.60
  -8   9   2    0.50    1.60
   8   9  -2    4.50    2.10
   7  -9  -2    0.40    1.30
  -7  -9   2    4.00    1.90
   7  -9  -2    2.70    1.90
   7  -9  -2    0.60    2.10
  -7  -9   2    0.60    1.60
  -7   9   2    1.40    1.90
   7   9  -2    2.90    1.70
   7   9  -2    2.50    1.90
  -7   9   2    0.00    1.50
   6  -9  -2   97.69    5.20
   6  -9  -2   95.49    5.50
  -6  -9   2  100.49    5.70
   6  -9  -2   92.79    6.00
  -6  -9   2   94.39    5.70
   6   9  -2   95.09    5.50
  -6   9   2   91.89    6.00
  -6   9   2   91.39    5.40
   6   9  -2  105.49    5.90
   5  -9  -2    1.40    1.50
   5  -9  -2    1.80    1.80
   5  -9  -2    3.00    1.40
  -5  -9   2    3.30    1.50
  -5  -9   2    1.90    1.50
  -5   9   2    2.60    1.20
   5   9  -2    3.00    1.70
   5   9  -2    0.70    1.30
  -5   9   2    2.20    1.70
   4  -9  -2   12.80    1.50
   4  -9  -2   12.10    1.60
  -4  -9   2   13.20    1.90
   4  -9  -2   13.70    1.70
  -4  -9   2   12.80    1.80
   4  -9  -2   11.00    2.00
   4   9  -2   15.10    2.10
  -4   9   2   11.40    1.50
   4   9  -2   14.80    1.70
   4   9  -2   11.90    1.80
  -4   9   2   14.00    2.10
   3  -9  -2   17.10    1.50
  -3  -9   2   13.70    1.70
  -3  -9   2   13.50    2.00
   3  -9  -2   16.20    1.60
   3  -9  -2   17.40    2.30
   3   9  -2   13.70    1.70
  -3   9   2   12.60    1.50
   3   9  -2   16.20    2.10
  -3   9   2   15.60    2.40
   3   9  -2   18.30    1.90
  -2  -9   2   81.89    4.90
  -2  -9   2   78.49    4.50
   2  -9  -2   82.09    5.10
   2  -9  -2   83.19    4.40
  -2  -9   2   79.09    4.70
   2  -9  -2   81.89    4.50
   2   9  -2   74.69    5.00
  -2   9   2   77.69    5.00
  -2   9   2   80.19    4.40
   2   9  -2   85.79    4.60
  -2   9   2   81.19    4.50
   2   9  -2   78.59    4.50
  -1  -9   2   19.70    1.90
   1  -9  -2   20.60    2.40
  -1  -9   2   23.20    2.40
   1  -9  -2   22.50    2.10
   1  -9  -2   21.40    1.80
  -1  -9   2   23.10    2.30
   1   9  -2   21.30    1.90
   1   9  -2   17.60    2.10
  -1   9   2   22.50    2.40
  -1   9   2   20.10    2.00
   1   9  -2   19.50    1.70
   0  -9  -2   -0.20    1.10
   0  -9  -2    0.00    1.10
   0  -9   2    1.00    1.40
   0  -9  -2    0.70    1.60
   0  -9   2    2.90    1.30
   0  -9   2    0.10    0.90
   0   9  -2    1.50    1.50
   0   9   2    1.20    1.50
   0   9  -2    0.40    0.80
   0   9  -2   -0.50    1.10
   0   9   2   -0.40    1.10
  -1  -9  -2   -0.10    1.20
   1  -9   2   -1.00    1.20
  -1  -9  -2    0.10    1.50
   1  -9   2    0.20    0.80
  -1  -9  -2    1.70    1.10
   1  -9   2   -0.20    1.50
  -1   9  -2    1.70    1.10
   1   9   2    0.10    1.40
  -1   9  -2    1.40    0.90
   1   9   2    1.90    1.20
  -1   9  -2   -1.60    1.40
   1   9   2    0.10    1.00
   2  -9   2   36.00    3.40
  -2  -9  -2   38.10    3.40
   2  -9   2   42.40    2.40
  -2  -9  -2   38.70    2.90
   2  -9   2   46.90    3.10
  -2  -9  -2   37.20    2.90
   2   9   2   39.30    3.10
  -2   9  -2   48.40    3.50
   2   9   2   38.30    3.40
   2   9   2   36.60    2.80
  -2   9  -2   42.60    2.90
  -3  -9  -2   16.10    1.90
   3  -9   2   13.40    1.80
   3  -9   2   17.50    1.40
  -3  -9  -2   16.70    1.70
  -3  -9  -2   14.60    2.00
   3  -9   2   17.70    2.20
   3   9   2   16.20    2.20
   3   9   2   15.70    1.60
  -3   9  -2   13.20    1.60
   3   9   2   16.80    1.90
  -3   9  -2   11.70    2.00
  -4  -9  -2   14.90    1.80
  -4  -9  -2   12.40    1.80
  -4  -9  -2   11.90    1.90
   4  -9   2   13.00    2.10
   4  -9   2   14.10    1.40
   4   9   2   13.50    1.60
   4   9   2   15.50    2.10
  -4   9  -2   13.00    2.20
  -4   9  -2   13.90    1.70
  -5  -9  -2    9.40    1.80
  -5  -9  -2    8.70    1.90
   5  -9   2    9.70    1.10
   5  -9   2    7.50    1.20
   5  -9   2    7.80    2.10
   5   9   2    9.70    2.00
  -5   9  -2    7.10    1.90
  -5   9  -2   11.50    1.70
   5   9   2    8.50    1.50
  -6  -9  -2  100.89    5.60
   6  -9   2   94.79    5.00
   6  -9   2   85.59    5.90
  -6  -9  -2   97.29    5.80
   6  -9   2   97.29    4.90
  -6   9  -2   93.89    5.60
   6   9   2   90.39    5.90
   6   9   2   88.59    5.40
  -6   9  -2   97.19    6.00
   7  -9   2    7.20    2.30
  -7  -9  -2    9.20    1.80
   7  -9   2   12.10    1.70
   7  -9   2    8.80    1.30
  -7  -9  -2    9.20    2.20
   7   9   2   10.20    2.30
   7   9   2    9.20    1.70
  -7   9  -2    7.70    1.90
  -8  -9  -2   -0.80    2.10
   8  -9   2    0.40    2.30
  -8  -9  -2    1.00    1.60
   8  -9   2    2.10    2.30
   8   9   2   -0.60    2.30
   8   9   2    0.80    1.60
  -8   9  -2    0.60    1.90
  -9  -9  -2    5.30    1.80
  -9  -9  -2    5.40    2.50
   9  -9   2    4.50    1.50
   9  -9   2    9.00    2.60
  -9   9  -2    5.50    2.10
   9   9   2    9.50    2.00
   9   9   2    4.80    2.60
 -10  -9  -2    5.80    2.00
 -10  -9  -2    7.50    3.00
  10  -9   2    9.60    2.80
  10  -9   2    9.80    1.80
  10  -9   2    8.50    2.70
 -10   9  -2    9.60    2.60
  10   9   2    8.30    2.30
  10   9   2    7.30    2.70
  11  -9   2   16.20    2.20
 -11  -9  -2   14.10    3.40
  11  -9   2   13.10    3.20
  11  -9   2   20.70    3.50
 -11  -9  -2   15.00    2.40
  11   9   2   12.90    2.60
 -11   9  -2   13.60    3.00
  11   9   2   20.20    3.60
 -12  -9  -2    5.10    3.80
  12  -9   2    7.20    3.40
  12  -9   2    3.20    2.20
  12  -9   2    4.00    3.20
  12   9   2    7.30    2.90
  12   9   2    6.70    3.60
 -12   9  -2   15.60    3.40
  13  -9   2    1.10    3.50
  13  -9   2   -2.40    3.40
 -13  -9  -2    1.30    4.30
  13   9   2    0.50    3.00
  13   9   2    2.50    4.30
  12 -10  -2    5.50    3.40
 -12 -10   2   -0.30    2.70
  12 -10  -2    1.00    2.50
  12 -10  -2    6.10    4.00
 -12 -10   2   -1.60    3.70
  12  10  -2    5.50    3.50
  12  10  -2   -0.70    3.00
  11 -10  -2   34.50    4.20
  11 -10  -2   23.70    2.90
 -11 -10   2   33.60    4.30
  11 -10  -2   37.50    4.00
 -11 -10   2   30.00    3.20
  11  10  -2   35.60    4.10
  11  10  -2   25.10    3.50
 -10 -10   2    7.90    2.40
  10 -10  -2    9.10    2.20
 -10 -10   2   10.00    3.20
  10 -10  -2   14.70    3.40
 -10  10   2   13.30    2.70
  10  10  -2   13.80    3.20
  10  10  -2   11.70    2.70
  -9 -10   2   19.50    2.50
   9 -10  -2   18.90    2.30
   9 -10  -2   17.30    3.30
  -9 -10   2   24.00    3.20
   9  10  -2   21.30    3.20
   9  10  -2   19.40    2.70
  -9  10   2   16.90    2.60
  -8 -10   2    4.90    2.00
   8 -10  -2    9.70    2.90
  -8 -10   2    3.30    2.30
   8 -10  -2    3.70    1.60
   8  10  -2   11.60    2.60
  -8  10   2    1.50    1.90
   8  10  -2    2.00    1.90
   7 -10  -2    0.60    1.40
  -7 -10   2    1.70    2.00
   7 -10  -2    2.70    2.30
  -7 -10   2   -0.40    1.80
  -7  10   2    3.10    2.20
  -7  10   2    4.10    1.70
   7  10  -2    1.60    1.70
   7  10  -2    3.70    2.30
   6 -10  -2    6.10    1.90
  -6 -10   2    4.10    1.70
   6 -10  -2    4.70    2.30
  -6 -10   2    5.90    2.10
   6 -10  -2    5.20    1.40
   6  10  -2    6.50    2.20
  -6  10   2    6.40    2.50
  -6  10   2    4.60    1.50
   6  10  -2    3.30    1.60
   5 -10  -2   12.90    1.90
  -5 -10   2   13.30    2.10
   5 -10  -2   13.40    2.50
  -5 -10   2   18.10    2.20
   5  10  -2   13.30    1.90
  -5  10   2   14.30    1.80
   5  10  -2   14.30    2.40
  -5  10   2   11.70    2.20
  -4 -10   2    5.80    1.60
   4 -10  -2    1.40    1.50
   4 -10  -2    3.60    2.10
  -4 -10   2    4.40    1.70
   4 -10  -2    5.50    1.50
   4  10  -2    5.50    2.00
  -4  10   2    3.60    1.30
  -4  10   2    5.40    2.10
   4  10  -2    3.60    1.60
   3 -10  -2   25.70    2.80
   3 -10  -2   30.50    2.80
  -3 -10   2   25.00    2.60
  -3 -10   2   27.30    2.70
  -3  10   2   24.30    2.10
  -3  10   2   28.20    2.90
   3  10  -2   24.20    2.30
   3  10  -2   27.50    2.70
   3  10  -2   29.60    2.80
  -2 -10   2    5.90    1.40
  -2 -10   2    7.60    1.90
   2 -10  -2    6.70    1.50
   2 -10  -2    5.60    2.00
   2  10  -2   12.20    1.60
   2  10  -2    8.10    1.90
  -2  10   2    7.50    1.30
   2  10  -2    9.30    1.50
  -2  10   2    4.80    1.90
  -2  10   2    7.80    1.60
   1 -10  -2   21.00    1.80
   1 -10  -2   21.60    2.50
   1 -10  -2   16.20    1.80
  -1 -10   2   14.10    2.20
  -1  10   2   19.00    1.80
   1  10  -2   18.20    1.80
  -1  10   2   18.30    1.70
   1  10  -2   18.80    1.90
   1  10  -2   18.60    2.40
  -1  10   2   17.00    2.40
   0 -10   2    3.40    1.10
   0 -10  -2    5.30    2.00
   0 -10  -2    5.80    1.30
   0 -10   2    2.60    1.60
   0 -10  -2    2.90    1.40
   0  10  -2    4.00    1.10
   0  10  -2    3.50    2.00
   0  10   2    3.30    1.20
   0  10   2    1.60    1.40
   0  10  -2    4.00    1.30
   0  10   2    4.30    1.70
  -1 -10  -2  498.55   24.50
   1 -10   2  503.25   23.90
   1 -10   2  501.05   24.50
  -1 -10  -2  504.65   24.10
  -1 -10  -2  484.55   24.10
  -1  10  -2  510.45   24.60
  -1  10  -2  499.55   24.20
   1  10   2  500.35   24.60
   1  10   2  478.65   24.10
   1  10   2  505.35   24.10
  -1  10  -2  510.25   23.90
   2 -10   2   73.59    3.80
  -2 -10  -2   79.29    4.90
  -2 -10  -2   75.39    4.30
  -2 -10  -2   72.09    4.40
   2 -10   2   62.19    4.90
   2  10   2   70.49    4.40
  -2  10  -2   68.59    4.30
   2  10   2   74.39    5.00
  -2  10  -2   74.69    4.90
   2  10   2   66.89    4.20
   3 -10   2   44.60    2.60
  -3 -10  -2   45.60    3.50
   3 -10   2   45.50    4.10
  -3 -10  -2   41.30    3.80
  -3 -10  -2   46.90    3.50
  -3  10  -2   49.20    3.90
   3  10   2   45.60    3.10
  -3  10  -2   47.40    3.30
   3  10   2   40.30    3.80
   4 -10   2    7.90    2.10
  -4 -10  -2    8.40    1.90
  -4 -10  -2    5.40    1.80
  -4  10  -2    9.30    2.30
   4  10   2    8.30    1.50
  -4  10  -2    8.40    1.60
   4  10   2    6.60    1.90
  -5 -10  -2   31.30    3.10
   5 -10   2   39.00    4.20
   5 -10   2   39.90    2.30
  -5 -10  -2   37.40    3.20
  -5  10  -2   32.80    3.50
   5  10   2   32.40    3.70
  -5  10  -2   38.80    3.30
   5  10   2   38.30    3.00
  -6 -10  -2    1.30    1.90
   6 -10   2    3.70    2.20
   6 -10   2    2.50    1.20
  -6 -10  -2    1.20    1.70
   6 -10   2    0.90    1.00
  -6  10  -2    3.80    1.80
  -6  10  -2   -0.40    1.90
   6  10   2    1.20    2.10
   6  10   2    3.40    1.50
   7 -10   2   29.40    2.30
   7 -10   2   32.00    3.30
  -7 -10  -2   25.20    2.70
  -7 -10  -2   26.10    3.00
   7  10   2   40.60    4.10
  -7  10  -2   26.30    2.70
   7  10   2   32.00    2.70
  -8 -10  -2   12.40    2.30
   8 -10   2   12.90    2.90
  -8 -10  -2   14.20    2.80
   8 -10   2   13.00    1.70
   8  10   2   17.40    3.10
   8  10   2   16.90    2.30
  -8  10  -2   19.70    2.60
  -9 -10  -2   10.30    3.00
   9 -10   2    7.60    1.80
  -9 -10  -2   11.20    2.30
   9 -10   2   13.40    3.00
   9  10   2   16.50    3.10
  -9  10  -2   10.20    2.40
   9  10   2    9.60    2.30
 -10 -10  -2   28.30    3.00
  10 -10   2   28.30    2.60
  10 -10   2   34.00    4.10
 -10 -10  -2   24.00    6.30
  10 -10   2   35.40    3.90
  10  10   2   32.40    3.20
 -10  10  -2   30.10    3.40
  10  10   2   35.00    3.90
  11 -10   2   55.59    5.00
 -11 -10  -2   64.89    6.40
 -11 -10  -2   40.50    3.90
  11 -10   2   57.69    5.90
  11  10   2   51.79    5.20
  11  10   2   57.19    5.10
  12 -10   2    1.60    3.40
 -12 -10  -2    3.50    4.00
  12 -10   2   -2.90    3.80
 -12  10  -2    7.00    3.40
  12  10   2   -1.50    2.70
  12  11  -2   -2.90    3.20
  12  11  -2   -0.50    4.70
  11 -11  -2   11.80    4.20
 -11 -11   2   11.40    4.00
 -11 -11   2   15.70    2.90
  11  11  -2   17.10    3.90
  11  11  -2    8.70    3.10
 -10 -11   2   -0.10    2.30
 -10 -11   2    4.20    3.40
  10 -11  -2    4.80    3.70
  10  11  -2    8.00    3.40
 -10  11   2    6.40    2.80
  -9 -11   2    7.30    2.90
  -9 -11   2    4.60    2.40
   9 -11  -2    4.30    1.90
  -9  11   2    3.40    2.40
   9  11  -2    6.30    2.40
   9  11  -2    7.50    3.10
  -8 -11   2   -2.30    2.10
   8 -11  -2    1.80    1.60
   8 -11  -2    0.40    2.90
  -8 -11   2    2.10    2.40
  -8  11   2    1.70    2.00
   8  11  -2   -1.20    2.60
   8  11  -2   -0.30    2.00
  -7 -11   2    4.20    2.30
   7 -11  -2    0.30    2.60
   7 -11  -2    1.30    1.50
  -7 -11   2    1.30    2.00
   7  11  -2    0.70    2.40
  -7  11   2   -1.20    1.80
  -7  11   2    1.60    2.90
   7  11  -2   -0.50    1.90
   6 -11  -2    1.10    2.50
  -6 -11   2    2.40    2.00
  -6 -11   2   -2.70    1.80
   6 -11  -2    2.30    1.40
  -6  11   2    4.20    1.70
   6  11  -2    1.90    1.80
  -6  11   2    3.00    2.40
   6  11  -2    0.50    2.30
  -5 -11   2    0.10    1.80
   5 -11  -2    3.70    1.40
  -5 -11   2   -0.80    1.80
   5 -11  -2    2.60    2.40
  -5  11   2    1.80    2.20
   5  11  -2    3.40    2.30
   5  11  -2    1.40    1.70
  -5  11   2    3.30    1.60
  -4 -11   2   -1.30    1.70
   4 -11  -2    6.20    2.20
   4 -11  -2    0.30    1.60
  -4 -11   2    1.90    1.70
   4 -11  -2    2.90    2.20
   4  11  -2   -0.40    1.50
  -4  11   2    0.70    1.40
  -4  11   2    0.30    2.30
   4  11  -2    1.20    2.10
  -3 -11   2   28.60    2.90
   3 -11  -2   27.90    3.30
  -3 -11   2   28.60    2.50
   3 -11  -2   24.30    2.40
   3 -11  -2   22.80    2.50
  -3  11   2   28.10    3.20
   3  11  -2   25.20    3.00
   3  11  -2   25.00    2.40
  -3  11   2   25.40    2.20
   2 -11  -2    0.40    1.60
   2 -11  -2    1.90    2.10
  -2 -11   2   -0.80    1.80
  -2 -11   2    1.10    1.40
   2 -11  -2    3.80    1.40
  -2  11   2    0.00    2.00
   2  11  -2    2.90    2.00
  -2  11   2    1.10    1.30
   2  11  -2    2.70    1.60
   2  11  -2    1.60    1.50
   1 -11  -2    4.90    1.70
   1 -11  -2    3.80    1.40
  -1 -11   2    4.20    2.20
  -1 -11   2    4.80    1.50
   1 -11  -2    5.90    2.20
  -1  11   2    2.70    1.50
  -1  11   2    5.30    1.40
  -1  11   2    5.60    2.30
   1  11  -2    6.80    1.50
   1  11  -2    6.40    2.10
   1  11  -2    3.50    1.50
   0 -11   2    9.30    2.10
   0 -11  -2    9.20    1.60
   0 -11  -2    5.40    1.70
   0 -11  -2   10.40    2.30
   0 -11   2    9.50    1.40
   0  11   2   11.60    2.50
   0  11   2    6.30    1.50
   0  11  -2    8.80    1.50
   0  11   2    6.00    1.60
   0  11  -2    8.10    2.20
   0  11  -2    4.70    1.40
   1 -11   2   58.59    3.30
   1 -11   2   54.39    4.60
  -1 -11  -2   57.59    4.60
  -1 -11  -2   53.59    4.00
  -1 -11  -2   52.69    3.80
  -1  11  -2   51.99    4.50
   1  11   2   57.49    4.50
   1  11   2   56.49    3.60
  -1  11  -2   57.69    3.80
  -1  11  -2   60.99    3.40
   1  11   2   47.60    3.80
   2 -11   2   -0.10    1.00
  -2 -11  -2   -3.20    1.40
   2 -11   2    3.10    2.20
  -2 -11  -2    1.20    1.80
  -2 -11  -2    0.00    2.00
  -2  11  -2    1.40    1.40
   2  11   2   -1.40    2.00
  -2  11  -2    0.10    1.90
   2  11   2   -1.30    1.30
  -3 -11  -2   50.59    4.40
   3 -11   2   57.09    4.60
  -3 -11  -2   50.99    4.00
   3  11   2   53.79    4.70
  -3  11  -2   50.79    4.60
   3  11   2   57.19    3.70
  -3  11  -2   54.19    3.80
  -4 -11  -2    0.30    1.90
  -4 -11  -2   -1.90    1.80
   4 -11   2    3.60    2.20
  -4  11  -2   -0.30    2.00
  -4  11  -2   -1.60    1.40
   4  11   2    2.40    1.50
   4  11   2    0.70    2.20
  -5 -11  -2    2.00    2.00
  -5 -11  -2    0.10    2.00
   5 -11   2   -1.70    2.20
  -5  11  -2   -2.20    2.30
  -5  11  -2    2.90    1.70
   5  11   2   -0.70    2.10
   5  11   2    1.80    1.50
  -6 -11  -2    1.70    1.90
   6 -11   2    3.70    2.50
  -6 -11  -2    1.80    2.10
   6  11   2    0.10    1.60
  -6  11  -2    0.90    1.70
   6  11   2    1.60    2.30
  -6  11  -2    6.60    2.60
  -7 -11  -2    1.20    2.40
  -7 -11  -2    4.90    2.20
   7 -11   2    7.00    2.80
   7  11   2    7.10    2.00
  -7  11  -2    4.90    2.10
   7  11   2    6.70    2.80
   8 -11   2    2.10    2.80
  -8 -11  -2   -1.20    2.40
  -8 -11  -2   -3.00    2.10
  -8  11  -2    2.20    2.30
   8  11   2   -3.80    2.80
   8  11   2   -6.20    1.90
  -9 -11  -2   -2.00    2.20
  -9 -11  -2   -0.40    3.00
   9 -11   2   -4.90    3.00
   9  11   2    5.50    3.10
   9  11   2    1.10    2.20
  -9  11  -2    0.70    2.50
 -10 -11  -2    2.30    3.50
  10 -11   2   -5.10    3.70
 -10 -11  -2   -2.30    2.40
 -10  11  -2    3.80    2.90
  10  11   2   -0.80    2.30
  10  11   2    2.00    3.50
  11 -11   2    6.10    3.70
 -11 -11  -2   10.60    4.00
  11 -11   2    7.90    3.90
  11  11   2   14.40    3.10
 -11  11  -2    8.30    3.60
  11  11   2   13.50    4.20
 -10 -12   2   17.10    3.80
  10 -12  -2   11.90    4.30
 -10 -12   2   11.50    3.10
  10  12  -2   20.30    3.30
  10  12  -2   14.00    5.00
 -10  12   2   14.80    3.40
  -9 -12   2    9.20    2.80
   9 -12  -2    1.80    3.60
  -9  12   2    7.30    2.70
   9  12  -2    8.00    3.50
   9  12  -2    1.40    2.80
   8 -12  -2   11.40    3.70
  -8 -12   2   14.90    2.90
  -8 -12   2   12.90    3.20
   8  12  -2    8.90    3.30
   8  12  -2    8.60    2.70
  -8  12   2    6.40    2.40
   7 -12  -2   37.20    3.70
  -7 -12   2   31.90    3.50
  -7 -12   2   28.00    3.50
   7 -12  -2   28.80    4.00
   7  12  -2   30.10    3.70
  -7  12   2   30.10    3.00
   7  12  -2   31.00    3.10
  -7  12   2   23.70    3.80
  -6 -12   2   -0.90    2.20
   6 -12  -2    3.40    1.50
  -6 -12   2    2.00    2.30
  -6  12   2    2.60    2.80
  -6  12   2    2.10    1.90
   6  12  -2   -3.00    1.90
   6  12  -2    6.10    2.80
  -5 -12   2    6.80    2.20
   5 -12  -2   10.40    1.70
   5 -12  -2   11.00    3.10
  -5 -12   2    6.60    2.30
   5  12  -2    7.10    2.10
   5  12  -2   13.60    2.90
  -5  12   2    5.00    3.00
  -5  12   2   10.10    2.00
   4 -12  -2   33.70    3.80
   4 -12  -2   36.30    2.90
  -4 -12   2   40.30    4.20
  -4 -12   2   36.10    3.20
  -4  12   2   37.70    3.50
  -4  12   2   33.40    3.70
   4  12  -2   36.20    3.60
   4  12  -2   39.00    3.80
  -3 -12   2   40.30    3.50
   3 -12  -2   43.20    3.90
  -3 -12   2   43.80    3.80
   3 -12  -2   35.00    3.00
  -3  12   2   35.60    3.80
   3  12  -2   36.60    3.00
   3  12  -2   43.70    3.90
  -3  12   2   35.80    3.30
  -2 -12   2    6.70    2.30
   2 -12  -2   10.90    1.70
   2 -12  -2    7.20    2.60
  -2 -12   2   12.10    1.90
   2  12  -2   11.30    2.70
   2  12  -2   12.30    2.00
  -2  12   2   10.10    1.70
  -2  12   2   11.70    2.70
  -1 -12   2    9.30    2.40
  -1 -12   2    5.80    1.60
   1 -12  -2    4.30    1.60
   1 -12  -2    5.00    2.50
   1  12  -2    2.30    2.30
   1  12  -2    6.00    1.80
  -1  12   2    6.70    1.60
  -1  12   2    3.10    2.70
   0 -12  -2   28.20    3.20
   0 -12   2   33.60    3.40
   0 -12  -2   31.10    2.90
   0  12  -2   29.20    2.60
   0  12   2   27.60    2.80
   0  12  -2   24.20    3.30
   0  12   2   27.60    3.40
  -1 -12  -2   19.70    2.20
   1 -12   2   19.50    2.90
   1 -12   2   19.50    1.70
  -1 -12  -2   20.00    3.00
  -1  12  -2   17.90    2.20
   1  12   2   19.10    2.00
  -1  12  -2   21.70    3.20
   1  12   2   21.90    3.10
  -2 -12  -2   11.60    2.50
  -2 -12  -2   10.40    2.00
   2 -12   2    3.70    2.40
   2 -12   2   10.10    1.40
  -2  12  -2   10.30    2.60
  -2  12  -2    7.60    1.90
   2  12   2   11.10    2.60
   2  12   2    9.50    1.70
  -3 -12  -2   75.59    5.10
  -3 -12  -2   77.19    5.70
   3 -12   2   77.89    5.90
   3  12   2   68.69    4.70
  -3  12  -2   79.69    5.00
   3  12   2   85.09    6.00
  -3  12  -2   76.89    5.70
   4 -12   2   44.50    4.10
  -4 -12  -2   37.60    4.10
  -4 -12  -2   46.90    4.40
   4  12   2   48.50    4.90
  -4  12  -2   45.70    3.90
  -4  12  -2   47.60    4.90
   4  12   2   43.80    3.70
  -5 -12  -2    1.80    2.20
  -5 -12  -2   -2.70    2.20
   5 -12   2    0.60    2.60
  -5  12  -2   -2.10    4.20
  -5  12  -2    2.50    1.90
   5  12   2    3.60    1.80
   5  12   2    5.90    2.80
  -6 -12  -2    3.50    2.40
   6 -12   2    1.00    4.00
  -6 -12  -2   -5.80    2.10
  -6  12  -2   -2.60    2.00
   6  12   2   -1.90    2.70
  -6  12  -2   -2.70    2.60
   6  12   2   -2.70    1.70
   7 -12   2   12.80    3.20
  -7 -12  -2    9.30    2.80
  -7 -12  -2    7.80    2.60
   7  12   2   14.90    2.50
   7  12   2   10.20    3.30
  -7  12  -2   11.20    2.50
  -8 -12  -2    3.50    3.00
  -8 -12  -2    0.60    2.50
   8 -12   2   -1.80    3.10
   8  12   2    6.30    4.20
  -8  12  -2   -3.70    2.40
   8  12   2   -2.90    2.30
  -9 -12  -2   -7.40    2.50
   9 -12   2    4.70    3.50
  -9 -12  -2    2.30    3.20
  -9  12  -2    1.00    2.90
   9  12   2   -1.00    2.40
   9  12   2    2.20    3.60
 -10 -12  -2    0.70    3.50
 -10 -12  -2    0.90    2.80
  10 -12   2   -3.00    3.70
  10  12   2   -2.30    3.90
 -10  12  -2   -1.00    3.20
   9 -13  -2    3.50    4.20
  -9 -13   2    4.30    3.20
  -9 -13   2    5.00    3.60
   9  13  -2   -0.60    3.00
   9  13  -2    2.80    3.90
  -9  13   2    2.30    3.00
  -8 -13   2   10.00    3.60
  -8 -13   2    7.10    3.00
   8 -13  -2    6.50    4.00
   8  13  -2    8.30    3.00
  -8  13   2    9.90    2.80
   8  13  -2    9.60    3.70
  -7 -13   2    0.30    2.70
  -7 -13   2    5.50    2.90
   7 -13  -2    7.20    3.70
  -7  13   2    3.10    2.40
   7  13  -2    3.10    2.60
  -7  13   2   -7.70    3.30
   6 -13  -2   26.80    4.20
  -6 -13   2   28.50    3.40
   6  13  -2   27.80    4.10
  -6  13   2   29.90    3.00
   6  13  -2   28.60    3.10
  -6  13   2   18.80    3.80
   5 -13  -2    6.40    3.30
  -5 -13   2   -1.00    2.20
  -5  13   2    3.70    3.20
  -5  13   2    4.10    2.00
   5  13  -2    2.30    3.10
   5  13  -2    2.60    2.20
   4 -13  -2    4.60    3.20
   4 -13  -2    2.10    2.40
  -4 -13   2    2.90    3.30
  -4 -13   2    0.40    2.10
   4  13  -2    1.00    2.10
  -4  13   2    3.60    2.00
   4  13  -2    6.70    3.10
  -4  13   2   -2.10    3.10
   3 -13  -2    1.80    1.60
  -3 -13   2    5.70    2.70
  -3 -13   2    2.90    2.10
   3 -13  -2    2.50    3.00
  -3  13   2    1.70    2.60
   3  13  -2    4.90    2.90
   3  13  -2    3.50    2.00
  -3  13   2    6.30    1.90
  -2 -13   2   17.90    2.30
  -2 -13   2   13.90    3.30
   2 -13  -2   19.60    3.40
   2 -13  -2   21.60    2.10
   2  13  -2   18.20    2.30
  -2  13   2   16.40    2.20
  -2  13   2   22.10    3.80
   2  13  -2   17.40    3.30
   1 -13  -2   11.00    1.90
  -1 -13   2    9.80    3.60
  -1 -13   2    9.10    1.80
   1  13  -2    5.50    1.90
  -1  13   2    8.50    1.80
   1  13  -2    8.30    2.90
   0 -13  -2    8.70    2.00
   0 -13  -2    9.90    3.80
   0  13   2   13.30    3.70
   0  13  -2    9.70    2.10
   0  13  -2   13.00    3.00
   0  13   2   10.40    1.90
  -1 -13  -2    0.90    1.90
   1 -13   2   -3.50    3.30
  -1 -13  -2    4.10    2.60
   1 -13   2    2.40    1.40
   1  13   2    5.60    2.80
  -1  13  -2    2.90    3.10
  -1  13  -2    0.70    1.80
   1  13   2    1.40    1.70
  -2 -13  -2   25.30    2.80
   2 -13   2   22.50    3.50
  -2 -13  -2   21.40    3.30
  -2  13  -2   22.30    2.50
   2  13   2   26.20    3.70
   2  13   2   23.10    2.40
  -3 -13  -2    3.30    2.10
  -3 -13  -2   -0.20    2.50
   3 -13   2    0.10    2.70
   3  13   2    3.70    3.50
  -3  13  -2    1.70    3.00
  -3  13  -2    1.10    1.80
   3  13   2   -1.90    1.70
  -4 -13  -2   12.10    2.60
  -4 -13  -2   15.20    3.00
   4 -13   2   12.80    3.10
  -4  13  -2   13.50    2.40
   4  13   2    8.90    2.20
  -4  13  -2   11.00    3.30
  -5 -13  -2    2.90    2.60
  -5 -13  -2   -2.00    2.50
   5 -13   2    3.60    3.10
  -5  13  -2    0.70    2.10
   5  13   2    2.20    3.60
  -5  13  -2   -2.50    2.90
   5  13   2    0.20    1.90
  -6 -13  -2   -2.20    2.80
  -6 -13  -2   -0.40    2.60
   6 -13   2   -0.70    3.10
  -6  13  -2   -0.80    3.40
  -6  13  -2    3.30    2.40
   6  13   2   -0.40    3.30
   6  13   2   -0.30    2.10
  -7 -13  -2   -1.60    2.90
   7 -13   2    2.00    3.50
  -7 -13  -2    1.10    2.80
   7  13   2   -3.50    2.30
   7  13   2    3.30    3.50
  -7  13  -2   -1.70    2.50
   8 -13   2   41.90    5.00
  -8 -13  -2   42.90    4.80
  -8 -13  -2   34.50    5.70
  -8  13  -2   45.80    4.20
   8  13   2   43.00    3.90
   8  13   2   44.80    5.20
  -9 -13  -2    3.60    3.70
   9 -13   2    6.90    4.10
   9  13   2    2.70    3.00
  -9  13  -2   -0.30    3.20
   9  13   2    2.40    3.80
  -7 -14   2   -0.90    3.20
   7 -14  -2   -1.90    3.90
  -7 -14   2   -0.50    3.20
  -7  14   2   -1.50    4.00
   7  14  -2    3.00    3.90
   6 -14  -2   -3.40    3.80
  -6 -14   2    0.40    3.00
  -6 -14   2   -1.00    3.00
  -6  14   2   -0.30    2.70
   6  14  -2    3.00    2.70
   6  14  -2   -1.30    3.60
  -6  14   2    7.60    3.70
  -5 -14   2   38.00    3.80
  -5 -14   2   41.60    4.30
   5 -14  -2   45.40    5.10
   5  14  -2   46.00    4.80
   5  14  -2   41.30    3.80
  -5  14   2   27.40    3.30
  -5  14   2   47.90    5.00
  -4 -14   2    2.80    2.80
  -4 -14   2    6.90    2.50
   4 -14  -2   -4.70    3.40
  -4  14   2    4.20    3.20
  -4  14   2    4.30    2.30
   4  14  -2   -3.60    3.40
   4  14  -2    2.90    2.50
  -3 -14   2    7.70    3.20
  -3 -14   2   12.80    2.50
   3 -14  -2   14.90    3.70
  -3  14   2    8.00    3.40
   3  14  -2    9.80    3.50
   3  14  -2   10.70    2.40
  -3  14   2   14.90    2.30
  -2 -14   2    4.70    2.90
  -2 -14   2   17.10    2.50
   2 -14  -2   13.40    3.50
  -2  14   2    9.40    3.60
   2  14  -2   15.40    3.70
  -2  14   2   14.80    2.30
   2  14  -2   11.30    2.50
   1 -14  -2    5.10    3.20
   1 -14  -2   -1.60    3.10
  -1 -14   2    0.00    2.80
  -1  14   2    2.40    2.00
   1  14  -2   -1.60    3.20
   1  14  -2   -1.10    2.10
  -1  14   2    1.20    3.30
   0 -14  -2   -0.70    1.80
   0 -14   2    0.00    2.90
   0 -14  -2   -4.00    2.90
   0  14  -2   -0.40    2.00
   0  14  -2   -3.30    3.10
   0  14   2    3.60    1.90
   0  14   2    3.50    3.30
  -1 -14  -2   46.10    4.30
  -1 -14  -2   49.90    4.70
   1 -14   2   48.10    4.70
  -1  14  -2   52.39    4.40
   1  14   2   45.90    4.00
  -1  14  -2   52.69    4.90
   1  14   2   53.89    5.80
   2 -14   2    8.50    3.50
  -2 -14  -2   20.50    2.70
  -2 -14  -2   16.90    3.50
   2  14   2   14.50    3.60
  -2  14  -2    6.00    3.50
  -2  14  -2   12.60    2.40
   2  14   2   11.60    2.30
  -3 -14  -2   16.00    2.80
   3 -14   2   14.20    3.50
  -3 -14  -2   21.90    3.50
  -3  14  -2   11.40    2.50
  -3  14  -2    9.10    3.50
   3  14   2   11.70    2.30
   3  14   2   14.90    3.70
   4 -14   2    3.50    3.40
  -4 -14  -2   -5.40    2.60
  -4 -14  -2   -1.00    2.70
   4  14   2    8.00    3.50
   4  14   2   -0.90    2.10
  -4  14  -2    6.20    2.40
  -4  14  -2   -1.20    3.10
  -5 -14  -2   24.30    3.60
  -5 -14  -2   29.40    3.60
   5 -14   2   24.80    4.30
   5  14   2   25.10    3.00
  -5  14  -2   21.20    4.20
  -5  14  -2   24.00    3.20
   5  14   2   29.20    4.40
  -6 -14  -2   12.50    3.40
  -6 -14  -2   10.50    3.40
   6 -14   2   14.70    4.10
   6  14   2   14.80    4.40
  -6  14  -2   14.30    4.00
  -6  14  -2    9.70    2.80
   6  14   2   10.10    2.60
   7 -14   2   -1.50    3.80
  -7 -14  -2    0.80    3.20
  -7 -14  -2   -0.60    3.40
   7  14   2    3.00    4.20
  -7  14  -2    0.80    3.00
   7  14   2   -6.30    2.50
   4 -15  -2    0.30    4.00
  -4 -15   2   -2.90    3.10
   4  15  -2    1.10    2.50
   4  15  -2    2.50    3.90
  -4  15   2    0.30    3.70
   3 -15  -2   17.30    4.30
  -3 -15   2    8.70    3.50
  -3  15   2    8.60    4.10
   3  15  -2    5.20    2.60
   3  15  -2   12.60    4.00
  -2 -15   2   -5.00    3.10
   2 -15  -2    0.60    3.70
   2  15  -2    3.00    3.80
   2  15  -2   -2.90    2.40
  -2  15   2   -0.40    3.80
  -1 -15   2   24.50    4.10
   1 -15  -2   18.20    4.10
   1  15  -2   21.70    3.10
  -1  15   2   24.70    4.40
   1  15  -2   24.90    4.40
   0 -15   2    2.30    3.40
   0 -15  -2    1.80    3.50
   0  15  -2   -0.80    2.30
   0  15   2   -0.60    3.80
   0  15  -2    4.60    3.70
  -1 -15  -2    4.60    3.50
   1 -15   2    0.40    3.30
  -1  15  -2    3.00    3.60
  -1  15  -2   11.70    2.50
   1  15   2   10.20    4.10
  -2 -15  -2    0.70    3.30
   2 -15   2    1.00    3.60
   2  15   2   -5.20    3.60
  -2  15  -2    3.20    2.50
  -2  15  -2   -0.30    3.70
   3 -15   2   11.70    4.00
  -3 -15  -2    9.70    3.70
  -3  15  -2   10.40    4.20
   3  15   2   12.90    4.20
  -3  15  -2   13.90    2.90
  -4 -15  -2    6.30    3.10
   4 -15   2   -4.10    3.70
  -4 -15  -2   -2.40    3.30
  -4  15  -2    0.50    3.90
  -4  15  -2    0.10    2.70
   4  15   2    0.60    3.90
  16   0  -3    2.40    3.00
 -16   0   3   -0.30    4.10
  16   0  -3   -3.50    3.60
  15   0  -3    2.40    3.00
 -15   0   3    0.00    3.50
  15   0  -3   -0.90    2.40
  14   0  -3    0.80    4.80
  14   0  -3    4.10    2.20
 -14   0   3    1.30    3.00
  13   0  -3    2.10    2.20
 -13   0   3   -0.90    2.40
  13   0  -3   -2.90    1.70
  12   0  -3    2.90    2.00
  12   0  -3   -0.30    1.50
 -12   0   3    1.00    1.60
 -12   0   3    0.30    2.10
  12   0  -3    1.60    1.60
  11   0  -3    0.30    1.60
 -11   0   3    3.30    2.00
  11   0  -3    0.50    1.40
 -11   0   3    0.20    1.30
  11   0  -3    1.30    1.30
  10   0  -3    4.50    1.30
 -10   0   3    2.80    1.70
  10   0  -3    1.50    1.40
 -10   0   3    0.50    1.10
  10   0  -3    2.90    1.20
   9   0  -3    0.90    1.10
  -9   0   3   -0.20    1.40
   9   0  -3    0.60    1.10
   9   0  -3   -0.90    1.00
  -9   0   3    0.20    0.90
   8   0  -3    1.90    0.90
   8   0  -3    1.10    0.90
  -8   0   3   -1.00    1.10
   8   0  -3    1.90    0.80
   8   0  -3   -1.70    1.40
  -8   0   3    1.00    0.80
  -7   0   3    0.60    0.70
   7   0  -3    0.80    1.00
   7   0  -3    0.30    0.70
   7   0  -3    1.10    1.20
   7   0  -3    0.10    0.70
   7   0  -3    1.90    0.90
  -7   0   3   -1.30    1.00
   6   0  -3   -1.40    0.80
   6   0  -3   -2.30    1.00
   6   0  -3   -0.40    0.70
  -6   0   3    0.50    0.70
   6   0  -3    0.90    0.60
   6   0  -3   -0.40    0.70
  -6   0   3   -0.80    1.00
  -5   0   3   -0.70    0.70
   5   0  -3    0.30    0.80
   5   0  -3    0.70    0.60
   5   0  -3    0.60    0.50
  -5   0   3   -0.30    0.50
   5   0  -3   -0.90    0.60
   4   0  -3    0.40    0.40
  -4   0   3    0.00    0.40
   4   0  -3   -0.50    0.40
  -4   0   3    0.40    0.60
   4   0  -3   -0.90    0.70
   3   0  -3    1.10    0.50
   3   0  -3    0.70    0.40
  -3   0   3   -0.20    0.40
   3   0  -3    0.80    0.40
   3   0  -3    0.20    0.30
  -3   0   3    0.30    0.50
  -2   0   3    0.10    0.40
   2   0  -3   -0.20    0.30
   2   0  -3    0.30    0.40
   2   0  -3   -0.30    0.30
  -2   0   3   -0.40    0.30
   2   0  -3    0.20    0.20
  -2   0   3    0.40    0.40
   1   0  -3    0.20    0.20
  -1   0   3    0.30    0.20
   1   0  -3    0.20    0.30
  -1   0   3    0.10    0.20
   1   0  -3    0.10    0.10
   1   0  -3    0.20    0.20
   0   0  -3  -10.30    7.30
   0   0  -3   10.20    7.10
   0   0   3    5.00    8.30
   0   0   3    4.10    7.80
  -1   0  -3    0.00    0.20
  -1   0  -3    0.20    0.30
   1   0   3    0.10    0.20
  -1   0  -3    0.20    0.20
   1   0   3    0.20    0.30
  -1   0  -3    0.30    0.20
   1   0   3   -0.20    0.20
   1   0   3    0.40    0.30
  -2   0  -3    0.50    0.40
  -2   0  -3   -0.10    0.40
   2   0   3    0.40    0.40
  -2   0  -3   -0.50    0.40
   2   0   3   -0.90    0.40
   2   0   3   -0.40    0.40
   3   0   3    0.50    0.40
  -3   0  -3   -0.50    0.40
   3   0   3   -0.20    0.50
  -3   0  -3    0.40    0.50
  -3   0  -3   -0.10    0.50
   3   0   3   -0.10    0.50
  -4   0  -3   -0.10    0.60
  -4   0  -3    0.50    0.60
  -4   0  -3    0.00    0.60
   4   0   3   -0.40    0.60
   4   0   3   -0.50    0.60
   4   0   3    0.30    0.50
   5   0   3    0.30    0.80
   5   0   3    0.10    0.70
   5   0   3   -1.20    0.80
  -5   0  -3   -0.10    0.70
  -5   0  -3   -0.80    0.80
  -5   0  -3    0.30    0.70
   6   0   3   -0.20    1.00
   6   0   3   -1.80    1.00
  -6   0  -3    1.20    0.90
   6   0   3    0.60    0.80
  -6   0  -3   -0.70    0.90
   7   0   3   -0.60    1.20
  -7   0  -3    0.60    1.00
  -7   0  -3   -0.30    1.00
   7   0   3    0.50    1.20
   7   0   3   -0.70    0.90
   8   0   3    0.10    1.40
  -8   0  -3   -1.50    1.10
   8   0   3    0.30    1.10
  -8   0  -3   -1.10    1.10
  -9   0  -3   -1.20    1.30
   9   0   3   -0.60    1.20
 -10   0  -3   -0.40    1.60
  10   0   3   -1.50    1.40
  11   0   3    0.90    1.80
 -11   0  -3   -0.70    1.80
  11   0   3    0.60    1.60
 -12   0  -3    2.40    2.10
  12   0   3    2.30    1.80
  12   0   3   -4.60    2.00
 -13   0  -3    3.40    2.60
  13   0   3    0.60    2.20
  13   0   3   -0.90    2.10
  14   0   3    2.00    2.80
 -14   0  -3    6.70    3.20
  14   0   3    2.70    2.40
  15   0   3    1.50    3.30
 -15   0  -3    1.90    3.60
  15   0   3    3.00    2.80
 -16   0  -3   -3.70    4.10
  16   0   3   -4.60    4.10
  16  -1  -3    7.90    3.00
  16  -1  -3    9.10    4.00
 -16  -1   3    0.00    4.30
  16   1  -3    2.90    3.40
 -16   1   3    2.00    4.30
  16   1  -3    4.00    3.00
  15  -1  -3    6.50    2.70
  15  -1  -3    3.70    3.10
 -15  -1   3    6.90    3.80
 -15   1   3    9.00    3.70
  15   1  -3    3.00    2.60
  15   1  -3    3.70    3.00
  14  -1  -3    4.00    4.20
 -14  -1   3    2.30    3.00
  14  -1  -3    2.70    2.20
 -14   1   3    5.30    3.10
  14   1  -3    8.10    2.30
 -13  -1   3    2.80    2.50
  13  -1  -3    2.30    2.30
  13  -1  -3    3.80    1.90
 -13  -1   3    3.30    1.70
  13   1  -3    2.10    1.80
  13   1  -3    3.30    2.30
 -13   1   3   -3.50    2.50
 -12  -1   3    4.00    1.50
  12  -1  -3   -0.20    1.70
  12  -1  -3    0.50    1.80
  12  -1  -3    1.00    1.60
 -12  -1   3    0.50    2.20
  12   1  -3    3.00    2.00
  12   1  -3    0.60    1.50
 -12   1   3    1.30    2.30
  12   1  -3    0.80    1.60
 -11  -1   3    0.50    1.90
 -11  -1   3    0.10    1.20
  11  -1  -3    2.40    1.40
  11  -1  -3    1.10    1.40
  11  -1  -3    3.30    1.70
  11   1  -3    1.20    1.30
  11   1  -3    2.40    1.40
 -11   1   3    0.80    1.80
  11   1  -3    2.20    1.60
 -10  -1   3   24.50    2.00
  10  -1  -3   21.40    1.80
 -10  -1   3   22.40    2.40
  10  -1  -3   20.70    2.20
  10  -1  -3   15.70    2.20
  10  -1  -3   21.00    2.20
  10   1  -3   22.80    2.20
  10   1  -3   18.80    2.20
 -10   1   3   19.30    2.40
 -10   1   3   21.10    1.90
  10   1  -3   20.60    2.10
   9  -1  -3   -0.20    1.40
   9  -1  -3    0.70    1.00
  -9  -1   3    1.10    0.90
  -9  -1   3    0.70    1.40
   9  -1  -3   -1.40    1.00
   9  -1  -3   -0.50    1.20
  -9  -1   3   -0.50    1.10
  -9   1   3    0.70    1.00
   9   1  -3    1.00    1.10
   9   1  -3   -0.40    1.00
   9   1  -3   -0.70    1.10
  -9   1   3    1.10    1.40
   8  -1  -3  211.78   10.70
  -8  -1   3  207.88   10.80
  -8  -1   3  220.48   10.50
   8  -1  -3  209.58   10.60
  -8  -1   3  222.28   10.50
   8  -1  -3  216.88   10.90
   8  -1  -3  207.88   10.80
   8  -1  -3  221.18   10.50
   8   1  -3  218.48   10.40
  -8   1   3  208.38   10.50
   8   1  -3  205.38   10.70
   8   1  -3  217.68   10.50
  -8   1   3  208.38   10.80
   7  -1  -3   83.79    4.80
  -7  -1   3   86.39    4.50
  -7  -1   3   91.89    4.50
   7  -1  -3   85.99    4.50
  -7  -1   3   85.59    4.90
   7  -1  -3   89.39    4.60
   7  -1  -3   85.79    4.90
   7  -1  -3   92.79    4.50
   7  -1  -3   85.09    4.70
   7   1  -3   89.69    4.80
   7   1  -3   86.39    4.50
  -7   1   3   85.49    4.60
   7   1  -3   91.59    4.50
  -7   1   3   85.29    4.80
   7   1  -3   89.29    5.00
   7   1  -3   84.09    4.70
  -6  -1   3   19.50    2.00
  -6  -1   3   18.90    1.50
   6  -1  -3   16.70    1.50
  -6  -1   3   18.50    1.50
   6  -1  -3   18.80    1.60
   6  -1  -3   20.30    2.00
   6  -1  -3   18.10    1.50
   6  -1  -3   19.10    1.50
  -6   1   3   16.40    1.60
   6   1  -3   19.00    1.80
   6   1  -3   20.60    1.50
   6   1  -3   19.30    2.10
   6   1  -3   22.70    1.50
   5  -1  -3   51.29    2.70
  -5  -1   3   46.60    2.70
  -5  -1   3   49.00    2.70
   5  -1  -3   46.40    2.90
   5  -1  -3   52.99    2.70
  -5  -1   3   46.70    2.90
   5  -1  -3   51.09    2.70
   5  -1  -3   50.59    3.00
   5   1  -3   46.70    2.90
  -5   1   3   49.90    2.90
   5   1  -3   52.69    2.70
   5   1  -3   49.40    2.60
   5   1  -3   49.20    2.80
  -5   1   3   47.30    2.70
  -4  -1   3  204.38    9.60
  -4  -1   3  207.78    9.80
  -4  -1   3  194.68    9.80
   4  -1  -3  201.38    9.70
   4  -1  -3  201.98    9.80
  -4  -1   3  204.48    9.70
   4  -1  -3  209.58    9.70
  -4   1   3  192.88    9.70
  -4   1   3  196.78    9.80
   4   1  -3  196.28    9.70
   4   1  -3  203.68    9.80
   4   1  -3  190.08    9.60
   3  -1  -3  171.58    8.20
  -3  -1   3  176.08    8.30
   3  -1  -3  172.88    8.30
   3  -1  -3  156.88    8.30
  -3  -1   3  171.78    8.20
   3  -1  -3  159.38    8.30
  -3  -1   3  175.18    8.20
   3   1  -3  178.68    8.20
  -3   1   3  171.58    8.20
  -3   1   3  164.58    8.30
   3   1  -3  172.68    8.20
   3   1  -3  172.78    8.30
  -3   1   3  171.18    8.30
  -2  -1   3   52.89    2.60
   2  -1  -3   50.09    2.60
   2  -1  -3   49.40    2.60
  -2  -1   3   50.19    2.70
  -2  -1   3   51.19    2.60
   2  -1  -3   49.10    2.60
  -2  -1   3   53.19    2.50
   2  -1  -3   51.59    2.70
  -2   1   3   50.39    2.60
   2   1  -3   52.49    2.60
   2   1  -3   53.09    2.70
   2   1  -3   52.09    2.60
   2   1  -3   50.59    2.50
  -2   1   3   51.79    2.60
  -1  -1   3   65.69    3.20
  -1  -1   3   64.39    3.20
   1  -1  -3   67.59    3.20
  -1  -1   3   68.99    3.20
  -1  -1   3   63.29    3.10
   1  -1  -3   63.89    3.20
   1  -1  -3   63.49    3.20
   1  -1  -3   66.99    3.10
   1   1  -3   65.19    3.20
  -1   1   3   65.29    3.20
  -1   1   3   61.59    3.20
   1   1  -3   66.09    3.20
   1   1  -3   65.39    3.20
  -1   1   3   64.99    3.20
   1   1  -3   64.49    3.10
   0  -1  -3  365.56   17.30
   0  -1  -3  360.76   17.30
   0  -1   3  364.56   17.30
   0  -1   3  367.46   17.30
   0  -1   3  357.76   17.30
   0  -1  -3  367.46   17.30
   0   1   3  352.36   17.30
   0   1  -3  363.96   17.20
   0   1  -3  368.46   17.30
   0   1   3  371.06   17.30
   0   1   3  362.46   17.30
   0   1  -3  357.46   17.30
  -1  -1  -3  197.68    9.50
  -1  -1  -3  200.98    9.50
   1  -1   3  203.68    9.50
   1  -1   3  197.68    9.40
   1  -1   3  196.38    9.50
  -1  -1  -3  202.08    9.50
   1  -1   3  199.48    9.50
  -1  -1  -3  195.88    9.50
   1   1   3  199.98    9.50
   1   1   3  201.48    9.50
  -1   1  -3  194.48    9.40
   1   1   3  198.98    9.50
  -1   1  -3  197.98    9.50
   1   1   3  195.68    9.50
  -1   1  -3  193.88    9.50
  -2  -1  -3 1059.09   49.10
  -2  -1  -3 1043.50   49.10
   2  -1   3 1017.00   49.10
   2  -1   3 1074.39   49.10
  -2  -1  -3 1039.80   49.00
  -2  -1  -3 1046.70   49.00
  -2  -1  -3 1039.00   49.10
   2  -1   3 1051.49   49.10
  -2   1  -3 1047.30   49.10
   2   1   3 1058.09   49.10
  -2   1  -3 1051.39   49.10
   2   1   3  943.11   49.20
  -2   1  -3 1022.90   49.10
   2   1   3  992.20   49.10
   3  -1   3  972.20   46.60
  -3  -1  -3 1003.10   46.70
   3  -1   3 1009.80   46.70
   3  -1   3  946.11   46.70
   3  -1   3 1015.20   46.70
  -3   1  -3  977.60   46.70
  -3   1  -3  939.71   46.60
   3   1   3  986.70   46.70
   3   1   3  938.51   46.70
  -3   1  -3  997.40   46.70
   3   1   3 1014.60   46.70
   4  -1   3   19.80    1.50
  -4  -1  -3   19.80    1.60
   4  -1   3   21.40    1.50
   4  -1   3   21.90    1.50
   4  -1   3   21.10    1.20
  -4  -1  -3   22.10    1.50
   4  -1   3   20.90    1.20
   4   1   3   22.80    1.50
  -4   1  -3   20.70    1.50
   4   1   3   23.70    1.50
   4   1   3   18.60    1.60
  -4   1  -3   18.30    1.50
  -4   1  -3   18.50    1.50
   5  -1   3    2.50    0.60
  -5  -1  -3    2.00    0.90
  -5  -1  -3    4.20    0.90
   5  -1   3    3.40    0.60
   5  -1   3    3.30    0.80
   5  -1   3    3.30    0.80
   5  -1   3    3.50    0.90
   5   1   3    4.30    0.90
  -5   1  -3    0.90    0.90
   5   1   3    4.00    0.90
   5   1   3    3.10    1.00
  -5   1  -3    2.70    0.90
  -5   1  -3    2.20    0.80
   6  -1   3   31.40    2.30
   6  -1   3   32.20    2.30
   6  -1   3   32.90    1.90
  -6  -1  -3   35.50    2.30
   6  -1   3   33.30    1.80
  -6  -1  -3   33.60    2.40
  -6   1  -3   31.20    2.30
  -6   1  -3   27.50    2.30
   6   1   3   33.20    2.30
   6   1   3   35.00    2.50
   6   1   3   35.00    2.50
  -6   1  -3   32.70    2.40
  -7  -1  -3   16.90    1.60
   7  -1   3   11.50    1.50
  -7  -1  -3   15.10    1.60
   7  -1   3   12.20    1.20
   7  -1   3   15.90    1.50
   7  -1   3   17.50    1.70
   7  -1   3   13.80    1.10
   7   1   3   16.40    1.80
   7   1   3   13.10    1.50
  -7   1  -3   10.60    1.40
   7   1   3   18.70    1.70
  -7   1  -3   14.50    1.50
   8  -1   3   66.89    3.80
  -8  -1  -3   64.49    3.90
   8  -1   3   64.89    4.20
  -8  -1  -3   68.39    4.10
   8  -1   3   66.39    3.40
   8  -1   3   68.99    3.40
   8   1   3   62.39    3.80
  -8   1  -3   64.59    4.00
  -9  -1  -3   49.30    3.70
   9  -1   3   49.10    3.20
   9  -1   3   43.20    2.60
  -9  -1  -3   46.80    3.50
   9  -1   3   45.00    2.50
   9   1   3   45.10    3.20
   9   1   3   49.70    3.30
  -9   1  -3   48.80    3.50
  10  -1   3   18.60    1.50
 -10  -1  -3   16.90    2.30
  10  -1   3   18.10    2.00
  10   1   3   19.50    2.00
  10   1   3   18.90    2.20
 -10   1  -3   17.10    2.20
 -11  -1  -3   16.90    2.50
  11  -1   3   12.10    1.90
 -11   1  -3   11.10    2.30
  11   1   3    9.00    1.90
  11   1   3   11.40    2.00
  12  -1   3    2.80    1.90
 -12  -1  -3   -0.70    2.30
  12   1   3    4.30    1.80
  12   1   3    5.20    2.00
 -12   1  -3    3.60    2.30
  13  -1   3   -0.60    2.10
  13  -1   3    0.00    2.30
 -13  -1  -3    1.70    2.70
  13   1   3   -0.50    2.30
 -13   1  -3    2.20    2.40
  13   1   3   -0.70    2.00
 -14  -1  -3    0.10    3.40
  14  -1   3    0.20    2.70
  14  -1   3    1.90    2.40
 -14   1  -3    2.40    3.20
  14   1   3    4.00    2.90
  14   1   3   -1.50    2.50
  15  -1   3    7.90    3.40
  15  -1   3    8.20    3.20
 -15  -1  -3   14.60    4.10
 -15   1  -3   15.60    3.90
  15   1   3    4.70    3.60
  15   1   3   12.90    3.10
  16  -1   3    3.70    4.00
  16  -1   3    5.40    3.50
 -16  -1  -3   -1.20    4.00
  16   1   3   -4.20    3.70
 -16   1  -3    2.50    4.30
  16  -2  -3   22.60    4.50
 -16  -2   3   28.00    5.00
  16  -2  -3   21.70    3.60
 -16   2   3   17.60    4.70
  16   2  -3   16.40    4.00
  16   2  -3   24.10    3.60
  15  -2  -3    8.20    3.60
 -15  -2   3    8.40    4.00
  15  -2  -3   10.30    2.80
 -15   2   3    2.40    3.60
  15   2  -3    5.20    2.70
  15   2  -3    4.70    3.00
 -14  -2   3   -1.40    5.20
  14  -2  -3   -1.50    2.10
  14  -2  -3    0.80    2.20
  14  -2  -3    1.10    4.30
  14   2  -3    1.40    2.70
  14   2  -3   -0.90    2.20
 -14   2   3   -2.00    2.80
 -13  -2   3    2.20    2.50
  13  -2  -3    0.80    2.20
  13  -2  -3   -0.80    1.90
 -13  -2   3    0.40    1.60
  13   2  -3    6.70    2.00
  13   2  -3   -1.90    2.10
 -13   2   3    1.80    2.50
  12  -2  -3   16.80    2.50
  12  -2  -3   19.10    2.20
 -12  -2   3   25.00    3.20
 -12  -2   3   25.60    2.60
  12  -2  -3   19.60    2.20
  12   2  -3   20.40    2.60
 -12   2   3   21.20    3.00
  12   2  -3   24.40    2.20
  12   2  -3   23.00    2.30
  11  -2  -3    2.60    1.60
  11  -2  -3   -1.40    1.40
 -11  -2   3    4.10    1.70
  11  -2  -3   -0.90    1.40
 -11  -2   3   -0.90    1.80
 -11  -2   3   -0.40    1.20
  11   2  -3   -0.40    1.30
  11   2  -3    1.40    1.40
  11   2  -3   -2.10    1.60
 -11   2   3   -0.20    1.80
 -10  -2   3  314.37   15.10
 -10  -2   3  315.87   15.50
  10  -2  -3  304.47   15.00
 -10  -2   3  320.37   15.00
  10  -2  -3  286.27   15.30
  10  -2  -3  309.97   15.30
  10  -2  -3  302.87   15.10
  10   2  -3  310.97   15.00
 -10   2   3  310.77   15.40
  10   2  -3  304.27   15.30
  10   2  -3  303.07   15.10
   9  -2  -3    7.50    1.30
  -9  -2   3    8.80    1.70
   9  -2  -3    9.30    1.30
   9  -2  -3    6.50    1.70
  -9  -2   3    7.70    1.10
  -9  -2   3    7.10    1.40
   9   2  -3    8.80    1.60
  -9   2   3    4.90    1.60
   9   2  -3    8.80    1.20
   9   2  -3    8.20    1.30
   8  -2  -3   19.60    1.80
   8  -2  -3   18.80    1.70
   8  -2  -3   21.30    2.10
   8  -2  -3   21.50    2.20
   8  -2  -3   15.90    2.10
  -8  -2   3   19.00    2.00
  -8  -2   3   19.50    1.80
  -8  -2   3   19.60    1.60
   8   2  -3   18.60    1.70
  -8   2   3   18.50    1.90
   8   2  -3   19.20    1.80
  -8   2   3   19.40    2.00
   8   2  -3   20.00    2.00
  -7  -2   3   20.20    1.70
   7  -2  -3   22.00    2.00
   7  -2  -3   22.70    1.70
  -7  -2   3   21.10    1.60
   7  -2  -3   18.70    2.00
  -7  -2   3   17.00    1.80
   7  -2  -3   20.10    1.90
   7  -2  -3   22.80    1.90
   7   2  -3   20.10    1.60
  -7   2   3   19.90    1.80
   7   2  -3   22.80    2.40
   7   2  -3   19.00    2.00
  -7   2   3   21.00    2.10
   7   2  -3   19.80    1.60
  -6  -2   3  561.64   28.10
  -6  -2   3  579.54   27.80
   6  -2  -3  587.14   27.90
   6  -2  -3  595.34   28.00
   6  -2  -3  587.74   28.00
   6  -2  -3  599.04   27.90
   6  -2  -3  588.54   27.90
  -6  -2   3  594.04   27.80
   6   2  -3  592.64   27.80
   6   2  -3  587.24   28.10
   6   2  -3  576.64   27.80
   6   2  -3  557.34   28.00
  -6   2   3  573.24   27.90
   5  -2  -3    0.30    0.80
   5  -2  -3    0.10    0.90
  -5  -2   3    1.40    0.80
   5  -2  -3    1.40    0.70
  -5  -2   3    1.40    0.60
  -5  -2   3    0.70    0.90
  -5  -2   3   -0.40    0.60
   5  -2  -3    0.10    0.70
  -5   2   3    0.20    0.80
   5   2  -3    1.70    1.00
   5   2  -3    1.20    0.70
  -5   2   3    0.30    0.70
   5   2  -3    0.80    0.80
   5   2  -3    0.50    0.60
  -4  -2   3    1.40    0.60
   4  -2  -3    0.90    0.60
   4  -2  -3    1.40    0.70
   4  -2  -3    0.50    0.60
   4  -2  -3    0.70    0.60
  -4  -2   3    1.00    0.40
  -4  -2   3    0.80    0.50
  -4  -2   3    0.80    0.70
  -4   2   3    0.80    0.60
   4   2  -3    0.50    0.50
   4   2  -3    1.00    0.60
   4   2  -3    1.70    0.60
  -4   2   3    0.20    0.60
  -4   2   3    0.80    0.60
   4   2  -3    1.30    0.80
  -3  -2   3    0.30    0.40
  -3  -2   3   -0.40    0.50
   3  -2  -3    0.60    0.50
  -3  -2   3    0.00    0.50
   3  -2  -3    0.20    0.60
   3  -2  -3    0.20    0.50
   3  -2  -3   -0.30    0.50
  -3  -2   3    0.00    0.30
   3   2  -3    0.10    0.50
  -3   2   3    0.20    0.50
   3   2  -3    0.10    0.60
  -3   2   3    0.30    0.50
  -3   2   3    0.50    0.40
   3   2  -3    0.40    0.50
   3   2  -3    0.00    0.40
   2  -2  -3  789.12   40.00
  -2  -2   3  833.72   40.00
   2  -2  -3  852.51   40.00
  -2  -2   3  878.61   40.00
   2  -2  -3  867.51   40.00
  -2  -2   3  833.12   40.00
   2  -2  -3  850.21   39.90
  -2  -2   3  848.22   39.90
   2   2  -3  850.21   40.00
  -2   2   3  836.62   39.90
  -2   2   3  809.72   40.00
   2   2  -3  847.72   40.00
   2   2  -3  837.22   39.90
  -2   2   3  836.32   40.00
  -1  -2   3    1.20    0.40
  -1  -2   3    1.10    0.40
  -1  -2   3    1.80    0.40
   1  -2  -3    1.80    0.50
  -1  -2   3    0.80    0.40
   1  -2  -3    1.20    0.30
   1  -2  -3    1.60    0.60
   1  -2  -3    1.60    0.50
  -1   2   3    1.20    0.30
  -1   2   3    0.70    0.40
   1   2  -3    1.50    0.40
  -1   2   3    2.10    0.40
   1   2  -3    1.60    0.40
  -1   2   3    1.50    0.40
   1   2  -3    1.60    0.50
   1   2  -3    1.60    0.40
   0  -2  -3 1726.63   90.79
   0  -2   3 2038.40   91.29
   0  -2  -3 2008.10   90.79
   0  -2   3 2041.30   91.19
   0  -2   3 2044.20   91.19
   0  -2   3 2071.59   90.89
   0  -2  -3 1695.13   90.79
   0  -2  -3 2047.50   91.19
   0   2   3 1928.01   90.79
   0   2   3 2042.00   91.19
   0   2  -3 1991.20   91.19
   0   2   3 1661.33   90.79
   0   2  -3 1670.33   90.79
   0   2  -3 1713.03   90.79
   0   2  -3 2070.49   90.89
  -1  -2  -3    1.50    0.50
   1  -2   3    2.30    0.60
   1  -2   3    1.80    0.50
  -1  -2  -3    1.90    0.50
   1  -2   3    2.30    0.50
   1   2   3    1.90    0.50
  -1   2  -3    2.70    0.50
   1   2   3    2.40    0.50
  -1   2  -3    2.60    0.50
  -1   2  -3    1.60    0.50
   1   2   3    2.40    0.30
   2  -2   3 3442.66  158.98
  -2  -2  -3 3679.63  159.08
  -2  -2  -3 3301.77  158.58
   2  -2   3 2906.61  158.38
   2  -2   3 3150.88  158.68
   2  -2   3 3353.16  158.48
  -2  -2  -3 3434.26  158.88
  -2   2  -3 2912.91  158.38
   2   2   3 3475.15  158.88
   2   2   3 3536.95  158.88
  -2   2  -3 3342.47  158.88
  -2   2  -3 3363.76  158.48
   2   2   3 3566.54  159.28
  -3  -2  -3  104.59    5.10
   3  -2   3  104.39    5.20
   3  -2   3  105.39    5.20
   3  -2   3  102.39    5.00
   3  -2   3   97.79    5.10
  -3  -2  -3  103.89    5.00
  -3  -2  -3   99.79    5.20
   3  -2   3   99.39    5.10
   3   2   3  101.89    5.10
   3   2   3  100.39    5.10
   3   2   3  106.59    5.10
  -3   2  -3  100.79    5.00
   3   2   3  104.89    5.20
  -3   2  -3  101.49    5.10
  -3   2  -3  103.79    5.10
   4  -2   3 1262.27   58.99
  -4  -2  -3 1239.48   58.89
  -4  -2  -3 1258.57   59.09
   4  -2   3 1300.57   59.09
  -4  -2  -3 1211.18   59.09
   4  -2   3 1220.58   58.99
   4  -2   3 1212.48   59.09
   4   2   3 1236.88   58.89
   4   2   3 1288.07   59.09
  -4   2  -3 1221.08   59.09
   4   2   3 1193.68   59.09
  -4   2  -3 1227.28   58.99
   4   2   3 1297.87   59.09
   4   2   3 1224.68   59.09
   5  -2   3   14.60    1.50
   5  -2   3   12.30    1.30
   5  -2   3   13.00    1.30
   5  -2   3   11.20    1.20
  -5  -2  -3   13.50    0.90
  -5  -2  -3   15.20    1.30
   5  -2   3   16.90    1.70
   5   2   3   12.70    1.40
   5   2   3   14.50    1.50
   5   2   3   13.30    1.30
   5   2   3   13.80    1.00
   5   2   3   13.80    1.40
  -5   2  -3   14.20    1.30
   6  -2   3   93.09    5.10
   6  -2   3   97.49    4.80
  -6  -2  -3   99.09    5.00
   6  -2   3   99.19    5.00
  -6  -2  -3   87.19    5.10
   6  -2   3   92.29    4.80
   6  -2   3   93.29    5.00
   6   2   3   95.49    5.10
   6   2   3   99.09    5.20
  -6   2  -3   96.39    5.10
   6   2   3   99.29    5.10
  -6   2  -3   95.69    5.00
   7  -2   3   11.50    1.40
  -7  -2  -3   16.00    1.50
   7  -2   3   15.60    1.40
   7  -2   3   12.30    1.60
   7  -2   3   15.30    1.60
   7  -2   3   17.10    1.40
  -7  -2  -3   13.80    1.60
   7   2   3   13.60    1.50
   7   2   3   14.50    1.80
   7   2   3   15.40    1.50
  -7   2  -3   16.50    1.60
  -7   2  -3   14.30    1.50
   7   2   3   15.20    1.50
  -8  -2  -3   53.49    3.50
   8  -2   3   52.49    2.90
   8  -2   3   50.49    2.80
   8  -2   3   50.39    3.50
  -8  -2  -3   50.09    3.30
   8  -2   3   52.69    3.20
  -8   2  -3   50.99    3.40
   8   2   3   48.60    3.20
  -8   2  -3   46.00    3.30
   8   2   3   50.69    3.30
   9  -2   3    6.30    1.10
  -9  -2  -3    6.40    1.70
   9  -2   3    8.20    1.50
   9  -2   3    7.00    1.00
   9   2   3    7.30    1.40
  -9   2  -3    4.90    1.50
  -9   2  -3    6.80    1.40
   9   2   3    7.40    1.40
  10  -2   3    3.70    1.00
 -10  -2  -3    2.60    1.90
  10  -2   3    2.10    1.40
  10  -2   3    2.50    1.10
 -10   2  -3    0.40    1.50
  10   2   3    6.00    1.60
  10   2   3    5.00    1.60
  11  -2   3    5.10    1.70
  11  -2   3    8.70    1.20
 -11  -2  -3    5.50    2.30
  11  -2   3    6.80    1.30
  11   2   3    4.20    1.90
 -11   2  -3    7.00    2.00
  11   2   3    4.80    1.80
  12  -2   3   11.80    1.40
  12  -2   3   14.70    1.40
 -12  -2  -3   11.30    2.70
  12  -2   3    9.00    2.00
 -12   2  -3   13.50    2.60
  12   2   3   12.70    2.40
  12   2   3   10.40    2.20
  13  -2   3    0.90    2.00
 -13  -2  -3   -1.70    2.70
 -13   2  -3   -0.30    2.50
  13   2   3   -0.40    2.10
  13   2   3    1.30    2.30
  14  -2   3   32.00    3.50
 -14  -2  -3   37.70    5.00
  14  -2   3   31.30    3.90
  14   2   3   29.30    3.40
  14   2   3   29.70    3.70
 -14   2  -3   36.20    4.20
  15  -2   3    8.00    3.70
 -15  -2  -3   21.30    4.40
  15  -2   3   13.40    3.30
 -15   2  -3   10.10    4.00
  15   2   3   14.50    3.20
  15   2   3    8.20    3.40
 -16  -2  -3   11.10    4.70
  16  -2   3    7.50    3.60
  16  -2   3    7.40    4.00
 -16   2  -3    3.80    4.30
  16   2   3    8.30    4.10
  16  -3  -3    8.00    3.20
 -16  -3   3    9.90    4.60
  16  -3  -3    3.70    4.20
  16   3  -3   12.90    3.40
  16   3  -3    3.40    3.70
 -16   3   3   10.70    4.30
 -15  -3   3   12.90    4.10
  15  -3  -3    5.50    2.80
  15  -3  -3    9.00    3.70
  15   3  -3   11.30    2.80
 -15   3   3   -2.00    3.70
  15   3  -3    7.00    3.40
 -14  -3   3    2.00    3.20
  14  -3  -3    3.90    2.40
  14  -3  -3    2.00    2.20
  14   3  -3   -0.10    2.70
  14   3  -3    6.30    2.50
 -14   3   3   -0.90    2.90
 -13  -3   3   11.80    1.80
  13  -3  -3   12.10    2.40
 -13  -3   3   13.10    3.00
  13  -3  -3    8.40    2.20
  13  -3  -3   10.80    2.50
  13   3  -3    7.70    2.50
 -13   3   3   10.80    2.80
  13   3  -3   13.10    2.40
  12  -3  -3    7.40    2.10
 -12  -3   3    9.70    1.60
 -12  -3   3   13.00    2.80
  12  -3  -3    8.30    2.20
  12  -3  -3    9.80    1.90
  12   3  -3    8.40    1.80
  12   3  -3   12.90    2.00
 -12   3   3    9.90    2.50
  12   3  -3   10.80    2.40
 -11  -3   3    4.50    2.20
  11  -3  -3    5.30    1.70
 -11  -3   3    3.80    1.30
  11  -3  -3    3.60    1.70
 -11  -3   3    8.20    1.80
  11  -3  -3    0.60    1.80
  11   3  -3    2.30    1.50
 -11   3   3    4.60    1.90
  11   3  -3    4.70    1.70
  11   3  -3    6.80    1.70
  10  -3  -3   14.80    1.80
 -10  -3   3   13.90    1.60
 -10  -3   3   16.90    1.80
  10  -3  -3   14.90    1.80
 -10  -3   3   11.90    2.20
 -10   3   3   14.40    2.20
  10   3  -3   17.30    1.80
  10   3  -3   15.60    1.70
  10   3  -3   14.70    2.00
   9  -3  -3   39.50    2.90
  -9  -3   3   40.20    2.60
   9  -3  -3   39.90    2.90
   9  -3  -3   38.70    3.40
  -9  -3   3   40.50    2.90
  -9  -3   3   38.70    3.40
   9   3  -3   45.70    2.90
  -9   3   3   40.20    3.20
   9   3  -3   38.20    3.10
   9   3  -3   43.20    2.90
   8  -3  -3    7.90    1.30
  -8  -3   3    8.40    1.10
   8  -3  -3   10.00    1.50
   8  -3  -3    6.10    1.50
   8  -3  -3    8.90    1.30
  -8  -3   3    9.40    1.30
  -8  -3   3    8.70    1.60
   8   3  -3    8.80    1.20
  -8   3   3    7.10    1.40
   8   3  -3    7.70    1.20
   8   3  -3    6.10    1.30
  -7  -3   3   -0.50    1.10
   7  -3  -3    1.20    0.90
   7  -3  -3    0.40    1.20
   7  -3  -3    0.10    1.10
  -7  -3   3    0.40    0.70
  -7  -3   3    0.10    0.80
   7  -3  -3    0.10    0.90
   7  -3  -3    0.50    1.30
  -7   3   3    0.40    1.00
   7   3  -3    0.40    0.80
   7   3  -3   -1.60    0.90
   7   3  -3    1.40    1.40
   7   3  -3   -0.20    0.80
   6  -3  -3   20.60    1.80
   6  -3  -3   18.80    2.00
  -6  -3   3   20.70    1.60
  -6  -3   3   20.60    2.00
  -6  -3   3   18.30    1.60
  -6  -3   3   20.00    2.00
   6  -3  -3   19.50    1.90
   6  -3  -3   21.90    2.00
   6   3  -3   18.20    1.70
   6   3  -3   21.80    1.60
  -6   3   3   21.80    1.80
   6   3  -3   24.20    1.90
   6   3  -3   21.70    2.20
   5  -3  -3    5.90    1.10
   5  -3  -3    6.80    1.10
  -5  -3   3    5.30    1.10
  -5  -3   3    6.30    0.90
   5  -3  -3    5.40    1.00
   5  -3  -3    6.50    1.10
  -5  -3   3    6.00    0.90
   5   3  -3    5.90    1.30
   5   3  -3    4.70    0.80
  -5   3   3    5.30    1.00
   5   3  -3    7.00    0.90
  -5   3   3    6.70    1.10
  -5   3   3    6.90    1.10
   4  -3  -3   21.20    1.70
   4  -3  -3   22.60    1.70
   4  -3  -3   21.40    1.60
  -4  -3   3   21.50    1.50
  -4  -3   3   21.20    1.60
  -4  -3   3   22.60    1.70
   4  -3  -3   22.00    1.60
  -4  -3   3   20.70    1.70
  -4   3   3   19.90    1.70
   4   3  -3   26.10    1.70
   4   3  -3   20.80    1.50
   4   3  -3   19.00    1.70
   4   3  -3   22.80    1.80
  -4   3   3   23.10    1.60
   3  -3  -3   11.60    1.10
   3  -3  -3   11.60    1.00
   3  -3  -3   11.00    1.20
  -3  -3   3   12.30    1.20
  -3  -3   3   12.00    1.00
   3  -3  -3   12.00    1.30
   3  -3  -3   10.80    1.10
  -3  -3   3   14.90    1.20
  -3  -3   3   12.50    1.20
   3   3  -3   12.70    1.30
  -3   3   3   11.50    1.10
   3   3  -3   13.10    1.20
   3   3  -3   12.00    1.20
   3   3  -3   10.90    1.10
  -3   3   3   12.80    1.30
  -2  -3   3  173.28    8.90
   2  -3  -3  185.28    8.90
   2  -3  -3  182.98    8.80
   2  -3  -3  186.28    8.80
  -2  -3   3  180.58    8.80
  -2  -3   3  184.28    8.90
   2  -3  -3  189.78    8.90
  -2   3   3  176.38    8.90
   2   3  -3  180.38    8.90
   2   3  -3  177.88    8.80
   2   3  -3  180.18    8.80
  -2   3   3  185.18    8.80
   2   3  -3  184.98    8.90
   1  -3  -3   15.40    1.10
  -1  -3   3   16.10    1.10
   1  -3  -3   13.90    1.20
   1  -3  -3   14.70    0.90
   1  -3  -3   15.20    1.30
  -1  -3   3   12.80    1.10
  -1  -3   3   14.40    1.00
   1   3  -3   17.00    1.20
   1   3  -3   15.00    1.00
   1   3  -3   15.20    1.10
  -1   3   3   15.50    0.90
  -1   3   3   14.80    1.20
   1   3  -3   13.90    1.10
  -1   3   3   14.40    1.20
   0  -3  -3    9.30    0.90
   0  -3   3   10.90    0.90
   0  -3  -3    9.10    1.00
   0  -3  -3    9.10    0.60
   0  -3   3    8.80    0.60
   0  -3  -3    9.40    1.00
   0  -3   3   11.10    0.90
   0  -3   3   10.00    1.00
   0   3  -3    8.10    0.60
   0   3   3    9.30    0.60
   0   3  -3    8.40    0.90
   0   3  -3   10.20    1.10
   0   3   3    9.10    0.90
   0   3  -3    8.30    0.90
   1  -3   3  345.07   17.00
  -1  -3  -3  348.07   16.90
  -1  -3  -3  359.66   16.80
   1  -3   3  361.46   17.00
  -1  -3  -3  359.86   17.00
  -1  -3  -3  348.27   16.90
   1  -3   3  358.86   16.90
  -1   3  -3  363.56   17.00
  -1   3  -3  349.67   17.00
   1   3   3  342.97   17.00
  -1   3  -3  346.57   16.90
   1   3   3  350.56   16.80
   1   3   3  359.16   16.90
  -2  -3  -3  158.58    7.70
   2  -3   3  156.28    7.70
   2  -3   3  153.28    7.50
   2  -3   3  161.78    7.70
  -2  -3  -3  162.38    7.60
  -2  -3  -3  156.08    7.70
  -2  -3  -3  158.58    7.70
   2  -3   3  159.58    7.80
  -2   3  -3  152.68    7.70
  -2   3  -3  158.68    7.80
   2   3   3  159.28    7.70
  -2   3  -3  156.98    7.80
   2   3   3  160.38    7.60
   2   3   3  155.08    7.70
  -3  -3  -3   75.69    3.90
   3  -3   3   74.99    3.90
  -3  -3  -3   78.39    3.80
   3  -3   3   74.59    3.70
  -3  -3  -3   77.19    4.00
   3  -3   3   73.49    4.00
   3  -3   3   71.29    3.90
   3   3   3   74.19    4.00
  -3   3  -3   75.39    3.70
   3   3   3   78.19    3.80
   3   3   3   75.69    3.90
  -3   3  -3   75.09    3.90
  -3   3  -3   73.59    3.90
   4  -3   3 1300.17   62.79
   4  -3   3 1368.86   62.79
   4  -3   3 1285.77   62.79
   4  -3   3 1362.16   62.89
  -4  -3  -3 1304.77   62.89
  -4  -3  -3 1345.87   62.79
  -4  -3  -3 1311.57   62.69
   4   3   3 1281.87   62.79
   4   3   3 1313.47   62.69
  -4   3  -3 1321.07   62.89
   4   3   3 1278.17   62.79
  -4   3  -3 1316.47   62.69
   4   3   3 1385.36   62.89
   5  -3   3   16.30    1.50
   5  -3   3   18.10    1.50
  -5  -3  -3   19.90    1.70
  -5  -3  -3   16.60    1.30
   5  -3   3   14.70    1.40
   5  -3   3   16.80    1.80
  -5  -3  -3   14.30    1.50
   5  -3   3   18.60    1.90
   5   3   3   12.80    1.30
  -5   3  -3   19.40    1.80
   5   3   3   14.70    1.30
   5   3   3   19.20    1.80
   5   3   3   12.90    1.40
   5   3   3   17.70    1.50
  -5   3  -3   17.30    1.60
   6  -3   3   23.10    2.50
   6  -3   3   40.30    2.40
  -6  -3  -3   25.50    2.20
   6  -3   3   26.80    2.10
   6  -3   3   31.80    2.20
  -6  -3  -3   29.60    1.80
   6  -3   3   37.20    2.10
  -6   3  -3   38.80    2.30
   6   3   3   27.40    2.50
   6   3   3   33.90    2.30
   6   3   3   41.10    2.30
   6   3   3   33.60    1.90
   6   3   3   25.60    2.30
   7  -3   3    9.80    1.20
   7  -3   3    7.00    1.20
  -7  -3  -3   10.10    1.50
   7  -3   3    7.90    1.10
   7  -3   3    6.10    1.40
   7  -3   3    9.10    1.40
  -7  -3  -3   12.20    1.40
  -7  -3  -3    9.30    1.00
   7  -3   3    5.60    1.50
   7   3   3   13.80    2.90
   7   3   3    8.20    1.20
   7   3   3    9.70    0.90
   7   3   3   10.70    1.30
  -7   3  -3    7.20    1.30
   7   3   3    9.00    1.40
   8  -3   3   24.30    2.40
  -8  -3  -3   30.80    2.80
  -8  -3  -3   27.40    2.50
   8  -3   3   29.70    2.70
   8  -3   3   27.30    2.20
   8  -3   3   24.30    2.10
   8   3   3   28.10    2.40
  -8   3  -3   21.90    2.20
   8   3   3   30.00    2.40
  -8   3  -3   28.00    2.50
   9  -3   3   29.40    2.30
   9  -3   3   28.00    2.70
   9  -3   3   27.80    2.40
   9  -3   3   35.60    2.80
  -9  -3  -3   30.10    3.00
  -9   3  -3   33.50    2.90
  -9   3  -3   29.70    2.90
   9   3   3   33.70    2.80
   9   3   3   35.40    2.90
  10  -3   3   53.39    3.40
  10  -3   3   56.09    3.30
  10  -3   3   52.19    3.80
 -10  -3  -3   56.29    4.30
 -10   3  -3   57.49    4.00
  10   3   3   54.19    3.90
  10   3   3   54.09    3.80
 -10   3  -3   54.09    4.00
 -11  -3  -3    6.40    2.30
  11  -3   3    6.00    1.40
  11  -3   3    4.10    1.50
  11  -3   3    6.20    1.70
  11   3   3    8.70    1.90
 -11   3  -3    7.70    2.10
  11   3   3    8.10    2.00
 -12  -3  -3   -2.00    2.40
  12  -3   3    0.70    1.50
  12  -3   3   -0.60    1.50
  12  -3   3    1.00    1.80
 -12   3  -3    0.10    2.20
  12   3   3   -1.40    1.80
  12   3   3   -0.10    2.10
  13  -3   3    5.70    2.20
  13  -3   3   10.30    1.70
 -13  -3  -3    4.80    2.90
  13   3   3    2.50    2.30
  13   3   3    2.50    2.40
 -13   3  -3    4.50    2.80
 -14  -3  -3   18.20    4.10
  14  -3   3   14.00    2.70
  14   3   3   15.10    3.10
  14   3   3   11.90    3.00
 -14   3  -3    8.60    3.40
 -15  -3  -3    1.50    4.10
  15  -3   3    1.60    3.60
  15   3   3    2.60    3.20
  15   3   3   11.90    3.40
 -16  -3  -3   10.00    4.80
  16  -3   3    4.80    4.20
  16  -3   3    4.00    3.40
 -16   3  -3    5.10    4.20
  16   3   3    0.80    3.60
  16  -4  -3   -4.50    4.00
 -16  -4   3    6.30    4.50
 -16   4   3   -1.20    4.20
  16   4  -3    1.50    3.60
  16   4  -3    3.80    3.80
  15  -4  -3    2.40    3.50
  15  -4  -3   -0.80    2.70
 -15  -4   3   -6.60    3.90
  15   4  -3    1.50    3.20
  15   4  -3    4.70    2.90
 -15   4   3    1.70    3.70
  14  -4  -3   15.30    3.40
 -14  -4   3   14.60    3.80
  14  -4  -3    9.10    2.70
  14  -4  -3   19.60    3.00
  14   4  -3   18.70    2.80
  14   4  -3   11.80    3.30
 -14   4   3   22.40    3.60
  13  -4  -3   22.00    3.10
 -13  -4   3   20.60    3.50
  13  -4  -3   19.00    2.70
  13  -4  -3   19.90    2.80
  13   4  -3   23.70    2.70
  13   4  -3   24.00    3.10
 -13   4   3   22.90    3.30
 -12  -4   3    0.20    2.30
  12  -4  -3   -1.60    2.00
  12  -4  -3    0.80    2.00
  12   4  -3   -0.30    2.10
  12   4  -3    0.00    1.80
 -12   4   3   -2.00    2.20
 -11  -4   3    7.40    2.30
  11  -4  -3   10.00    2.00
  11  -4  -3    9.00    2.00
  11   4  -3   10.00    2.10
  11   4  -3   11.50    1.90
 -11   4   3    7.40    2.20
  11   4  -3    9.70    1.80
  10  -4  -3    2.40    1.60
 -10  -4   3   -2.30    1.40
 -10  -4   3    1.40    1.80
  10  -4  -3    2.50    1.50
 -10   4   3    1.30    1.70
  10   4  -3    0.20    1.50
  10   4  -3    2.30    1.40
  10   4  -3    1.70    1.70
   9  -4  -3  232.08   11.60
  -9  -4   3  231.78   11.40
   9  -4  -3  224.48   11.50
  -9  -4   3  209.38   11.50
  -9  -4   3  235.68   11.90
   9   4  -3  235.88   11.40
   9   4  -3  230.88   11.70
  -9   4   3  236.48   11.70
   9   4  -3  236.48   11.40
  -8  -4   3   17.80    2.10
  -8  -4   3   16.60    1.50
   8  -4  -3   17.90    1.80
   8  -4  -3   13.50    1.70
  -8  -4   3   17.40    1.90
   8  -4  -3   15.80    2.00
   8  -4  -3   14.80    1.90
   8   4  -3   16.50    1.80
  -8   4   3   13.90    1.70
   8   4  -3   18.50    1.70
   8   4  -3   12.70    1.70
  -7  -4   3    1.50    0.90
  -7  -4   3   -1.20    1.10
   7  -4  -3    0.90    1.10
   7  -4  -3    0.90    1.30
  -7  -4   3    1.10    1.40
   7  -4  -3    3.00    1.20
   7  -4  -3    1.60    1.30
   7   4  -3    0.40    1.10
  -7   4   3    0.00    0.90
   7   4  -3    2.70    1.10
  -7   4   3    0.90    1.10
   7   4  -3    0.10    0.90
  -6  -4   3   11.00    1.40
   6  -4  -3   10.90    1.40
   6  -4  -3   11.10    1.50
  -6  -4   3   14.10    1.30
   6  -4  -3   10.80    1.40
  -6  -4   3    9.60    1.40
   6  -4  -3   12.10    1.40
  -6  -4   3   11.20    1.20
   6   4  -3   12.60    1.20
   6   4  -3   13.30    1.30
   6   4  -3   11.00    1.40
   6   4  -3   12.30    1.60
  -6   4   3    9.20    1.20
  -5  -4   3    7.30    1.00
  -5  -4   3    5.20    1.20
   5  -4  -3    6.50    1.00
  -5  -4   3    6.10    1.10
  -5  -4   3    6.80    0.90
   5  -4  -3    6.50    1.30
   5  -4  -3    6.70    1.20
   5  -4  -3    7.60    1.10
   5   4  -3    7.00    1.00
  -5   4   3    7.10    1.20
   5   4  -3    6.40    1.00
   5   4  -3    5.00    1.30
  -5   4   3    4.20    0.90
   5   4  -3    6.10    1.00
   4  -4  -3   50.69    3.00
   4  -4  -3   49.99    2.90
   4  -4  -3   53.59    3.10
  -4  -4   3   50.79    2.90
   4  -4  -3   52.29    3.10
   4  -4  -3   58.89    3.20
  -4  -4   3   50.89    3.00
  -4  -4   3   48.60    3.10
  -4  -4   3   54.39    3.00
  -4   4   3   50.59    2.90
   4   4  -3   53.19    3.00
   4   4  -3   47.10    3.00
   4   4  -3   52.59    3.10
  -4   4   3   49.10    3.00
   4   4  -3   49.80    2.90
  -3  -4   3  895.71   42.30
   3  -4  -3  860.91   42.30
  -3  -4   3  871.01   42.40
   3  -4  -3  880.71   42.30
  -3  -4   3  874.61   42.40
   3  -4  -3  903.81   42.40
   3  -4  -3  915.71   42.30
  -3  -4   3  933.51   42.40
   3  -4  -3  903.51   42.40
  -3   4   3  865.61   42.30
   3   4  -3  894.81   42.40
   3   4  -3  918.51   42.40
  -3   4   3  878.61   42.40
   3   4  -3  858.81   42.40
   3   4  -3  881.71   42.30
  -2  -4   3   11.80    1.20
  -2  -4   3   11.60    1.00
   2  -4  -3   12.70    1.20
   2  -4  -3   10.10    1.10
  -2  -4   3   12.10    1.20
  -2  -4   3   11.80    1.20
   2  -4  -3   10.80    1.00
   2  -4  -3    9.90    1.10
   2  -4  -3    8.70    1.10
   2   4  -3   10.50    1.00
  -2   4   3   10.40    1.00
  -2   4   3   11.30    1.20
   2   4  -3    9.70    1.00
  -2   4   3    8.70    1.00
   2   4  -3   13.00    1.10
   2   4  -3   11.50    1.10
   1  -4  -3  157.08    7.50
   1  -4  -3  154.38    7.80
  -1  -4   3  155.08    7.60
   1  -4  -3  154.98    7.70
   1  -4  -3  154.28    7.60
  -1  -4   3  157.28    7.70
  -1  -4   3  161.28    7.70
  -1  -4   3  157.58    7.70
  -1   4   3  160.08    7.60
   1   4  -3  154.38    7.70
   1   4  -3  156.88    7.80
   1   4  -3  158.28    7.60
  -1   4   3  157.88    7.50
   1   4  -3  155.48    7.70
  -1   4   3  150.58    7.80
   0  -4   3   45.10    2.40
   0  -4  -3   44.30    2.20
   0  -4  -3   42.90    2.30
   0  -4   3   42.10    2.20
   0  -4  -3   40.50    2.50
   0  -4   3   43.00    2.50
   0  -4   3   40.70    2.50
   0  -4  -3   43.60    2.50
   0   4  -3   44.90    2.50
   0   4  -3   44.20    2.40
   0   4  -3   41.70    2.50
   0   4   3   42.70    2.40
   0   4   3   42.90    2.20
   0   4   3   41.30    2.50
   0   4  -3   42.90    2.20
  -1  -4  -3   90.69    4.80
  -1  -4  -3   95.79    4.90
   1  -4   3   98.99    4.80
   1  -4   3   93.29    4.90
   1  -4   3   97.29    4.90
  -1  -4  -3   89.99    4.80
  -1  -4  -3   97.69    4.60
   1   4   3   93.49    4.60
  -1   4  -3   94.09    4.80
  -1   4  -3   91.39    4.80
   1   4   3   92.09    4.90
   1   4   3   94.59    4.80
  -1   4  -3   98.19    4.90
   2  -4   3   17.00    1.60
  -2  -4  -3   16.40    1.50
   2  -4   3   15.60    1.40
   2  -4   3   15.50    1.60
  -2  -4  -3   17.00    1.60
  -2  -4  -3   15.70    1.20
  -2  -4  -3   15.80    1.50
  -2   4  -3   18.00    1.60
  -2   4  -3   17.20    1.40
   2   4   3   18.10    1.20
   2   4   3   19.80    1.50
   2   4   3   15.90    1.50
  -2   4  -3   19.80    1.70
  -3  -4  -3   14.50    1.20
   3  -4   3   14.00    1.40
   3  -4   3   12.50    1.00
   3  -4   3   12.20    1.20
  -3  -4  -3   12.70    1.30
  -3  -4  -3   15.10    1.40
   3  -4   3   15.90    1.40
  -3  -4  -3   13.00    1.20
  -3   4  -3   14.50    1.50
   3   4   3   16.20    1.40
  -3   4  -3    9.20    1.20
   3   4   3   13.10    1.10
  -3   4  -3   12.40    1.30
   3   4   3   12.50    1.30
   3   4   3   14.80    1.40
   4  -4   3   12.30    1.30
  -4  -4  -3   11.20    2.10
  -4  -4  -3   14.80    1.40
   4  -4   3   12.40    1.40
   4  -4   3   11.90    1.30
  -4  -4  -3   12.90    1.30
   4  -4   3   12.60    1.10
   4   4   3   13.40    1.40
  -4   4  -3   12.20    1.20
   4   4   3   13.40    1.20
   4   4   3   12.90    1.20
   4   4   3    9.90    1.30
  -4   4  -3   11.70    1.50
  -5  -4  -3    1.90    1.00
   5  -4   3    2.70    0.90
   5  -4   3    4.30    1.10
   5  -4   3    3.10    1.30
  -5  -4  -3    1.90    0.80
   5  -4   3    1.10    0.80
  -5  -4  -3    3.00    1.10
   5   4   3    2.80    1.10
   5   4   3    2.10    1.00
   5   4   3    2.30    0.80
  -5   4  -3    2.30    0.80
  -5   4  -3    2.20    1.00
   6  -4   3   51.99    3.80
   6  -4   3   62.89    3.50
  -6  -4  -3   62.49    3.50
   6  -4   3   57.69    3.50
  -6  -4  -3   59.59    3.20
   6  -4   3   62.69    3.60
   6  -4   3   57.49    3.90
   6  -4   3   61.19    3.40
  -6  -4  -3   58.39    3.70
   6   4   3   59.09    3.30
   6   4   3   57.69    3.50
   6   4   3   60.89    3.50
  -6   4  -3   63.09    3.40
  -6   4  -3   56.59    3.60
   7  -4   3   52.79    3.40
  -7  -4  -3   56.59    2.90
   7  -4   3   54.29    3.40
   7  -4   3   47.50    3.50
  -7  -4  -3   51.89    3.30
  -7  -4  -3   54.89    3.60
   7  -4   3   59.39    3.40
  -7   4  -3   57.79    3.50
   7   4   3   50.79    3.50
   7   4   3   54.79    3.00
   7   4   3   49.10    3.30
  -7   4  -3   51.09    3.60
   7   4   3   54.89    3.40
  -8  -4  -3   19.50    1.60
   8  -4   3   19.80    1.90
   8  -4   3   22.70    2.00
   8  -4   3   18.90    2.00
  -8  -4  -3   17.00    1.90
  -8  -4  -3   20.60    2.20
  -8   4  -3   19.90    2.00
   8   4   3   19.70    1.90
   8   4   3   24.10    2.10
  -8   4  -3   19.90    1.90
   8   4   3   20.30    1.70
   9  -4   3   39.60    3.00
   9  -4   3   35.40    3.30
  -9  -4  -3   36.00    2.20
   9  -4   3   36.30    2.90
  -9  -4  -3   37.10    3.40
   9  -4   3   34.60    3.00
   9   4   3   34.40    3.00
   9   4   3   34.80    3.00
  -9   4  -3   34.20    3.00
  -9   4  -3   36.20    3.20
  10  -4   3    0.30    1.50
  10  -4   3    3.40    1.60
  10  -4   3    4.30    1.70
 -10  -4  -3    1.60    2.00
  10   4   3    1.90    1.80
 -10   4  -3   -1.40    1.50
  10   4   3    5.00    1.70
 -10   4  -3   -0.10    1.70
  11  -4   3  102.39    5.70
 -11  -4  -3  102.89    6.60
  11  -4   3   99.49    6.00
  11  -4   3   92.99    5.60
 -11   4  -3  105.09    6.20
  11   4   3   98.99    6.00
  11   4   3  101.29    6.10
  12  -4   3   -0.60    2.00
 -12  -4  -3    2.70    2.70
  12  -4   3    1.90    1.80
 -12   4  -3    3.80    2.30
  12   4   3    2.20    2.00
  12   4   3    3.60    2.20
  13  -4   3   -2.90    1.90
 -13  -4  -3    7.20    3.30
  13  -4   3    5.70    2.40
  13   4   3   -1.00    2.30
 -13   4  -3    3.70    2.70
  13   4   3    5.00    2.60
 -14  -4  -3    0.50    3.80
  14  -4   3   -3.20    2.40
 -14   4  -3   -3.60    3.00
  14   4   3   -0.20    2.90
  14   4   3    0.90    2.70
  15  -4   3   -7.60    2.80
 -15  -4  -3    5.80    4.40
  15   4   3    2.50    3.40
  15   4   3   -1.80    3.10
  16  -4   3    1.00    3.30
 -16  -4  -3    5.10    5.00
  16  -4   3    9.60    4.60
  16   4   3    0.60    3.90
  16   4   3    9.60    4.10
 -16   4  -3    7.30    4.40
 -16  -5   3   -6.30    4.90
  16   5  -3    3.90    4.00
  15  -5  -3    2.40    3.00
  15  -5  -3    6.30    3.60
  15  -5  -3   10.40    3.80
 -15  -5   3    7.40    4.00
  15   5  -3    7.40    3.20
  15   5  -3    1.60    3.40
  14  -5  -3    2.40    2.60
  14  -5  -3    6.50    2.90
  14  -5  -3   -1.90    3.00
 -14  -5   3   -0.50    3.40
  14   5  -3    3.90    2.90
  14   5  -3    2.00    2.60
  13  -5  -3   33.30    3.60
 -13  -5   3   32.70    3.30
  13  -5  -3   30.40    3.30
  13  -5  -3   35.90    3.50
 -13   5   3   32.90    3.80
  13   5  -3   27.10    3.70
  13   5  -3   32.50    3.20
 -12  -5   3   -1.00    1.50
 -12  -5   3   -1.20    2.70
  12  -5  -3   -2.30    2.10
  12  -5  -3    2.20    2.00
  12   5  -3    1.40    1.90
 -12   5   3   -0.80    2.40
  12   5  -3   -1.90    2.20
  11  -5  -3    8.60    2.00
  11  -5  -3    8.20    2.10
 -11  -5   3    5.40    1.50
 -11  -5   3   10.80    2.50
  11   5  -3   11.20    2.00
  11   5  -3    8.00    2.20
  11   5  -3    5.50    2.10
 -10  -5   3    3.40    2.00
 -10  -5   3    2.70    1.70
  10  -5  -3    4.60    1.90
  10  -5  -3    5.80    1.80
 -10  -5   3    5.30    1.30
  10   5  -3    1.90    1.70
  10   5  -3    2.20    1.70
  10   5  -3    6.10    1.60
  -9  -5   3   64.69    3.90
   9  -5  -3   67.29    4.20
  -9  -5   3   63.89    4.60
   9  -5  -3   64.99    4.30
  -9  -5   3   65.39    3.80
   9   5  -3   60.19    4.10
   9   5  -3   58.99    4.30
   9   5  -3   66.59    4.00
   8  -5  -3    3.30    1.50
   8  -5  -3    3.30    1.60
   8  -5  -3    4.20    1.70
  -8  -5   3    1.40    1.50
  -8  -5   3    2.00    1.20
  -8  -5   3    1.10    1.10
   8   5  -3    2.30    1.30
  -8   5   3    1.80    1.20
   8   5  -3    3.40    1.30
   8   5  -3    0.40    1.30
   7  -5  -3    2.90    1.40
  -7  -5   3    4.10    1.10
   7  -5  -3    2.00    1.30
   7  -5  -3    2.80    1.40
  -7  -5   3    2.90    1.30
  -7  -5   3    2.30    1.00
   7  -5  -3    5.10    2.60
   7  -5  -3    2.60    1.30
   7   5  -3    2.80    1.10
   7   5  -3    3.10    1.20
   7   5  -3    1.30    1.20
  -7   5   3    1.10    1.00
  -6  -5   3   15.70    1.80
   6  -5  -3   19.50    1.90
   6  -5  -3   17.70    1.70
  -6  -5   3   18.20    1.80
   6  -5  -3   19.60    2.00
  -6  -5   3   17.10    1.70
   6  -5  -3   15.50    1.70
   6  -5  -3   18.20    1.60
   6   5  -3   18.10    1.80
   6   5  -3   20.20    1.90
  -6   5   3   17.20    1.60
   6   5  -3   17.50    1.70
   6   5  -3   19.10    1.70
  -6   5   3   16.30    1.70
   5  -5  -3    8.40    1.20
  -5  -5   3    6.30    1.30
   5  -5  -3    6.90    1.30
   5  -5  -3    6.90    1.30
   5  -5  -3    8.20    1.50
  -5  -5   3    8.00    1.10
  -5  -5   3    8.60    1.20
   5  -5  -3    4.20    1.10
   5  -5  -3    6.20    1.00
   5   5  -3    6.80    1.20
  -5   5   3    6.90    1.10
  -5   5   3    7.40    1.30
   5   5  -3    6.90    1.10
   5   5  -3    8.10    1.30
   5   5  -3    8.50    1.20
   4  -5  -3    1.90    1.10
   4  -5  -3    2.10    0.80
  -4  -5   3    1.80    1.10
   4  -5  -3    2.70    1.00
   4  -5  -3    2.40    0.80
  -4  -5   3    2.10    0.90
   4  -5  -3    3.20    0.80
   4  -5  -3    1.70    1.00
  -4  -5   3    2.80    1.10
   4   5  -3    2.10    0.90
   4   5  -3    2.10    0.90
   4   5  -3    1.30    0.80
  -4   5   3    2.30    0.80
  -4   5   3    2.80    1.10
   4   5  -3    0.60    1.00
  -3  -5   3  577.34   26.20
  -3  -5   3  567.14   26.20
  -3  -5   3  486.05   26.40
   3  -5  -3  554.74   26.10
   3  -5  -3  536.85   26.30
   3  -5  -3  566.24   26.30
  -3  -5   3  538.65   26.20
   3  -5  -3  546.45   26.30
   3  -5  -3  547.15   26.10
  -3   5   3  542.95   26.30
   3   5  -3  565.44   26.30
   3   5  -3  538.05   26.20
   3   5  -3  555.94   26.20
   3   5  -3  532.05   26.20
  -3   5   3  544.45   26.10
   2  -5  -3   28.00    1.80
  -2  -5   3   30.40    2.10
  -2  -5   3   30.70    1.90
   2  -5  -3   27.00    2.30
  -2  -5   3   29.30    2.10
   2  -5  -3   31.80    2.40
  -2  -5   3   25.80    2.20
   2  -5  -3   31.60    2.00
  -2   5   3   26.80    1.80
  -2   5   3   30.50    1.90
   2   5  -3   30.80    2.10
   2   5  -3   30.80    2.10
   2   5  -3   30.30    1.90
   2   5  -3   31.40    2.20
  -1  -5   3  220.68   11.40
   1  -5  -3  204.88   11.30
  -1  -5   3  235.08   11.20
   1  -5  -3  237.78   11.20
  -1  -5   3  240.38   11.40
  -1  -5   3  255.17   11.30
   1  -5  -3  194.38   11.50
   1  -5  -3  237.18   11.40
   1   5  -3  237.68   11.30
  -1   5   3  238.88   11.20
   1   5  -3  228.38   11.30
  -1   5   3  239.78   11.20
   1   5  -3  237.88   11.40
   1   5  -3  237.48   11.40
   0  -5  -3   15.70    1.40
   0  -5   3   14.30    1.50
   0  -5  -3   22.50    1.70
   0  -5  -3   20.50    1.20
   0  -5   3   16.60    1.50
   0  -5   3   17.10    1.20
   0  -5  -3   15.20    1.50
   0  -5   3   19.30    1.80
   0   5   3   16.00    1.70
   0   5  -3   19.10    1.60
   0   5  -3   16.40    1.70
   0   5   3   19.10    1.30
   0   5  -3   18.70    1.60
   0   5  -3   17.70    1.20
   0   5   3   20.70    1.50
   1  -5   3 1112.19   50.69
  -1  -5  -3 1070.49   50.59
  -1  -5  -3 1127.99   50.59
   1  -5   3  937.71   50.79
  -1  -5  -3 1058.09   50.39
   1  -5   3 1064.09   50.29
   1  -5   3 1090.79   50.49
  -1  -5  -3 1090.89   50.49
  -1   5  -3 1135.09   50.69
   1   5   3 1102.29   50.49
   1   5   3  955.90   50.79
   1   5   3 1048.50   50.39
  -1   5  -3 1033.40   50.49
  -1   5  -3 1037.10   50.59
  -1   5  -3 1058.09   50.29
   2  -5   3  143.59    7.20
  -2  -5  -3  139.89    7.10
  -2  -5  -3  139.49    6.90
  -2  -5  -3  142.09    7.10
  -2  -5  -3  142.59    7.00
   2  -5   3  141.19    7.00
  -2   5  -3  147.09    7.20
   2   5   3  143.19    6.90
   2   5   3  144.09    7.00
  -2   5  -3  131.59    7.00
  -2   5  -3  119.39    7.20
   3  -5   3  140.89    6.70
  -3  -5  -3  133.49    7.00
   3  -5   3  137.79    6.70
  -3  -5  -3  143.49    6.90
  -3  -5  -3  140.39    7.10
   3  -5   3  143.69    7.10
   3  -5   3  138.39    6.90
   3   5   3  127.69    7.10
   3   5   3  136.59    6.90
   3   5   3  141.49    7.00
  -3   5  -3  132.39    7.00
  -3   5  -3  143.09    7.10
   3   5   3  141.89    7.10
  -3   5  -3  135.69    7.10
   4  -5   3   23.60    2.40
  -4  -5  -3   27.40    2.20
   4  -5   3   26.60    2.30
   4  -5   3   26.20    1.70
  -4  -5  -3   29.30    2.20
  -4  -5  -3   30.30    1.90
  -4  -5  -3   28.60    2.00
   4  -5   3   25.90    2.30
   4  -5   3   26.60    1.70
   4   5   3   27.80    2.10
   4   5   3   26.30    2.10
  -4   5  -3   30.50    2.30
  -4   5  -3   27.50    2.10
   4   5   3   27.40    2.40
   4   5   3   28.20    2.00
   5  -5   3  172.08    8.40
   5  -5   3  163.38    8.60
  -5  -5  -3  163.08    8.50
  -5  -5  -3  167.98    8.30
  -5  -5  -3  173.98    8.40
   5  -5   3  161.88    8.40
   5  -5   3  163.08    8.20
  -5   5  -3  167.58    8.40
   5   5   3  173.68    8.30
   5   5   3  167.38    8.50
   5   5   3  163.08    8.30
   5   5   3  165.78    8.50
  -6  -5  -3   47.10    2.80
   6  -5   3   48.00    2.80
  -6  -5  -3   43.30    3.20
   6  -5   3   49.30    3.20
   6  -5   3   43.40    3.00
  -6  -5  -3   45.20    3.10
   6  -5   3   44.10    3.20
  -6   5  -3   45.60    3.00
   6   5   3   43.30    2.90
  -6   5  -3   51.69    2.80
   6   5   3   44.50    3.00
   6   5   3   45.40    2.90
   7  -5   3  307.57   15.20
   7  -5   3  307.37   15.30
  -7  -5  -3  306.97   15.40
  -7  -5  -3  310.47   15.00
  -7  -5  -3  291.57   15.20
   7  -5   3  316.37   15.20
   7  -5   3  316.47   15.10
   7   5   3  309.17   15.20
   7   5   3  316.07   15.00
  -7   5  -3  309.77   15.30
  -7   5  -3  314.57   15.10
   7   5   3  311.27   15.30
   8  -5   3   41.10    3.30
   8  -5   3   48.90    3.40
  -8  -5  -3   41.60    2.70
   8  -5   3   39.10    3.10
  -8  -5  -3   40.30    3.60
   8  -5   3   45.40    3.20
  -8   5  -3   46.70    3.40
   8   5   3   41.30    2.90
  -8   5  -3   43.90    3.10
   8   5   3   46.70    3.30
   8   5   3   44.40    3.10
   9  -5   3   30.80    3.30
   9  -5   3   31.80    3.20
  -9  -5  -3   32.30    2.30
   9  -5   3   31.90    3.10
  -9  -5  -3   31.10    3.00
   9  -5   3   33.40    3.00
   9   5   3   31.10    3.00
  -9   5  -3   33.20    3.00
  -9   5  -3   28.80    2.70
   9   5   3   31.30    3.10
  10  -5   3    7.60    1.80
  10  -5   3    9.30    2.00
 -10  -5  -3    7.20    2.20
 -10  -5  -3    9.40    1.20
  10  -5   3    7.90    1.90
  10   5   3    9.40    2.00
 -10   5  -3    9.10    1.90
  10   5   3   10.00    1.90
 -10   5  -3    6.60    1.90
  11  -5   3   28.70    2.70
 -11  -5  -3   26.90    3.30
  11  -5   3   33.40    3.40
  11  -5   3   33.90    3.50
 -11   5  -3   29.80    3.10
  11   5   3   24.00    2.70
  11   5   3   35.10    3.10
 -11   5  -3   26.00    2.90
  12  -5   3   -2.60    2.00
  12  -5   3   -0.20    2.00
 -12  -5  -3   -0.70    2.70
  12   5   3    2.10    2.10
 -12   5  -3   -0.50    2.20
  12   5   3    3.00    2.20
  13  -5   3   -6.90    2.10
  13  -5   3   -3.90    2.20
 -13  -5  -3    1.60    3.20
 -13   5  -3   -1.70    2.60
  13   5   3    3.20    2.60
  13   5   3    2.10    2.40
 -14  -5  -3    2.60    3.80
  14   5   3    4.30    3.00
  14   5   3    1.40    2.90
 -14   5  -3    6.60    3.40
 -15  -5  -3   13.80    4.70
  15  -5   3    6.60    3.20
  15   5   3   15.60    3.90
  15   5   3   16.80    3.70
 -15   5  -3   22.00    4.40
  15  -6  -3   -1.60    3.60
  15  -6  -3   -1.70    3.70
  15  -6  -3   -2.80    3.10
 -15  -6   3   -8.00    4.30
  15   6  -3    1.20    3.20
  15   6  -3    1.60    3.40
  14  -6  -3    0.40    2.80
  14  -6  -3    1.60    3.10
 -14  -6   3    4.80    3.80
  14  -6  -3   -0.50    3.20
  14   6  -3    4.60    2.80
  14   6  -3    6.20    3.20
  13  -6  -3    5.90    2.80
 -13  -6   3    1.10    1.90
 -13  -6   3    0.90    3.10
  13  -6  -3   -2.40    2.30
  13   6  -3    3.90    2.70
  13   6  -3   -2.50    2.40
  12  -6  -3    6.80    2.40
  12  -6  -3    7.10    2.60
 -12  -6   3    4.50    1.80
 -12  -6   3    9.70    3.00
  12   6  -3    5.70    2.30
  12   6  -3    9.00    2.50
 -11  -6   3   50.09    5.00
  11  -6  -3   52.79    4.50
 -11  -6   3   44.40    3.50
  11  -6  -3   52.09    4.30
  11   6  -3   68.79    5.80
  11   6  -3   54.09    4.10
  11   6  -3   50.29    4.40
 -10  -6   3   31.40    2.70
 -10  -6   3   32.40    3.30
  10  -6  -3   27.90    2.90
  10  -6  -3   24.50    2.70
  10   6  -3   27.30    2.70
  10   6  -3   31.60    2.70
  10   6  -3   29.00    2.80
  -9  -6   3    2.60    1.30
  -9  -6   3    2.50    1.60
   9  -6  -3    1.50    1.70
  -9  -6   3    5.40    1.90
   9   6  -3    4.40    1.70
   9   6  -3    2.20    1.50
   9   6  -3    3.00    1.80
  -9   6   3    1.40    1.60
  -8  -6   3   11.00    1.60
  -8  -6   3    7.80    1.80
  -8  -6   3    9.70    1.40
   8  -6  -3    7.10    2.00
   8  -6  -3   11.00    1.90
   8   6  -3   11.60    1.70
   8   6  -3    8.90    1.60
   8   6  -3   11.30    1.90
  -8   6   3    9.50    1.60
   7  -6  -3   -0.20    1.40
   7  -6  -3   -0.40    1.40
  -7  -6   3    0.80    1.10
   7  -6  -3    0.60    1.20
  -7  -6   3    0.00    1.30
   7  -6  -3   -0.30    1.30
  -7  -6   3   -0.60    1.40
  -7   6   3   -0.40    1.10
   7   6  -3    1.00    1.20
   7   6  -3   -0.40    1.20
   7   6  -3   -1.80    1.40
  -6  -6   3    2.70    1.20
   6  -6  -3    3.40    1.40
  -6  -6   3    5.40    1.40
   6  -6  -3    3.10    1.20
   6  -6  -3    5.60    1.50
  -6  -6   3    2.70    1.10
   6  -6  -3    4.10    1.20
   6   6  -3    6.60    1.40
  -6   6   3    5.40    1.10
   6   6  -3    5.40    1.30
  -6   6   3    4.50    1.40
   6   6  -3    3.70    1.40
   6   6  -3    3.30    1.70
   5  -6  -3   23.20    2.00
  -5  -6   3   21.80    2.30
   5  -6  -3   22.40    2.00
   5  -6  -3   20.90    2.00
  -5  -6   3   19.70    2.00
   5  -6  -3   27.10    2.60
   5  -6  -3   22.10    1.90
  -5  -6   3   24.10    2.10
   5  -6  -3   19.00    2.10
  -5  -6   3   22.40    2.20
  -5   6   3   22.70    2.10
   5   6  -3   21.60    2.10
  -5   6   3   20.40    1.90
   5   6  -3   23.00    2.30
   5   6  -3   23.80    2.10
   5   6  -3   22.80    2.30
   4  -6  -3  159.88    7.90
   4  -6  -3  154.88    8.10
   4  -6  -3  155.68    8.20
  -4  -6   3  158.98    8.00
   4  -6  -3  158.98    7.80
  -4  -6   3  160.98    8.00
   4  -6  -3  162.58    7.80
   4  -6  -3  156.78    8.20
  -4  -6   3  160.28    8.00
  -4  -6   3  165.58    8.00
   4   6  -3  153.28    7.90
  -4   6   3  151.18    8.10
   4   6  -3  154.38    8.10
  -4   6   3  155.48    7.90
   4   6  -3  153.88    8.00
   4   6  -3  160.98    8.00
   3  -6  -3    3.50    1.40
   3  -6  -3    4.30    0.70
   3  -6  -3    4.80    0.90
  -3  -6   3    4.50    1.20
  -3  -6   3    3.50    0.90
   3  -6  -3    3.90    1.30
   3  -6  -3    2.50    1.30
  -3  -6   3    2.50    0.90
  -3  -6   3    3.30    1.00
  -3   6   3    3.50    0.80
   3   6  -3    3.70    1.00
   3   6  -3    3.40    1.00
  -3   6   3    1.90    1.10
   3   6  -3    1.80    1.20
   3   6  -3    1.90    1.20
   2  -6  -3  371.66   17.90
  -2  -6   3  371.66   17.90
   2  -6  -3  368.16   18.10
  -2  -6   3  369.36   18.10
  -2  -6   3  390.56   18.00
   2  -6  -3  380.66   17.80
   2  -6  -3  356.06   18.10
  -2  -6   3  378.06   18.00
  -2   6   3  383.36   17.90
  -2   6   3  363.56   18.10
   2   6  -3  340.87   18.20
   2   6  -3  385.36   17.90
  -2   6   3  371.96   17.80
   2   6  -3  366.46   18.10
  -1  -6   3    6.60    1.10
   1  -6  -3    5.50    1.20
  -1  -6   3    5.30    0.80
   1  -6  -3    4.60    0.70
   1  -6  -3    6.40    1.30
  -1  -6   3    4.80    1.20
  -1  -6   3    5.80    1.00
   1  -6  -3    5.40    0.80
   1   6  -3    5.20    1.00
   1   6  -3    8.30    0.90
  -1   6   3    4.50    1.10
  -1   6   3    6.50    0.90
   1   6  -3    6.70    1.40
   1   6  -3    4.80    1.10
  -1   6   3    6.10    0.80
   0  -6  -3   55.29    2.70
   0  -6   3   55.89    2.70
   0  -6  -3   54.19    3.20
   0  -6   3   47.20    3.30
   0  -6  -3   49.70    2.90
   0  -6   3   48.70    2.90
   0  -6   3   54.49    3.20
   0  -6  -3   47.60    3.20
   0   6   3   49.20    2.70
   0   6  -3   58.99    3.20
   0   6   3   60.59    3.20
   0   6   3   45.30    2.90
   0   6  -3   44.50    3.00
   0   6  -3   43.80    3.20
   0   6  -3   45.00    2.60
  -1  -6  -3    2.60    0.70
   1  -6   3    1.70    0.50
   1  -6   3    0.80    1.00
  -1  -6  -3    2.40    1.10
   1  -6   3    3.00    1.30
   1  -6   3    2.00    0.80
  -1  -6  -3    0.40    1.10
  -1  -6  -3    1.70    0.90
   1   6   3    3.10    1.00
  -1   6  -3    2.90    0.50
  -1   6  -3    2.70    0.90
   1   6   3    2.60    0.90
   1   6   3    3.50    0.70
  -1   6  -3    1.70    1.10
  -1   6  -3    3.60    1.20
  -2  -6  -3   10.40    1.50
  -2  -6  -3   11.90    1.40
  -2  -6  -3   12.80    1.50
   2  -6   3   11.40    0.90
   2  -6   3   18.10    1.70
   2  -6   3   12.50    1.40
   2  -6   3   12.70    1.30
  -2  -6  -3   13.90    1.10
  -2   6  -3   11.70    1.50
   2   6   3   12.20    1.30
   2   6   3   15.20    1.60
  -2   6  -3   12.40    1.60
   2   6   3   15.90    1.40
  -3  -6  -3   10.10    1.30
   3  -6   3    9.10    1.20
  -3  -6  -3    9.00    1.00
  -3  -6  -3   10.60    1.60
   3  -6   3   10.70    0.90
   3  -6   3   10.90    1.40
   3  -6   3   10.90    1.60
  -3  -6  -3   10.80    1.30
   3  -6   3    9.60    0.90
   3   6   3   11.90    1.10
   3   6   3    8.70    1.40
  -3   6  -3    6.80    1.30
  -3   6  -3    8.90    1.60
   3   6   3   11.90    1.30
   3   6   3   11.80    1.50
  -3   6  -3    8.60    1.20
   4  -6   3  230.18   11.00
  -4  -6  -3  233.78   11.20
   4  -6   3  229.48   10.90
   4  -6   3  224.68   11.20
  -4  -6  -3  225.88   11.30
   4  -6   3  225.08   11.30
  -4  -6  -3  231.18   11.30
  -4  -6  -3  199.78   11.40
   4  -6   3  225.88   11.40
   4   6   3  248.08   11.30
  -4   6  -3  224.98   11.30
   4   6   3  221.58   11.20
  -4   6  -3  232.68   11.40
   4   6   3  224.18   11.30
   4   6   3  238.38   11.30
   5  -6   3    2.10    0.80
   5  -6   3    1.60    1.20
  -5  -6  -3    1.90    1.20
   5  -6   3    2.60    0.70
  -5  -6  -3    1.00    1.10
   5  -6   3    1.70    1.30
   5   6   3    1.70    0.90
  -5   6  -3    0.80    1.10
   5   6   3    1.20    1.30
   5   6   3    2.00    1.30
   5   6   3    2.30    1.20
   6  -6   3  121.89    6.20
   6  -6   3  114.59    6.60
  -6  -6  -3  128.09    6.70
   6  -6   3  123.19    6.60
  -6   6  -3  125.49    6.60
   6   6   3  122.29    6.60
   6   6   3  123.19    6.40
   6   6   3  125.19    6.50
  -7  -6  -3   11.10    1.80
   7  -6   3    8.00    1.60
   7  -6   3   12.30    1.90
   7  -6   3    9.50    1.50
   7   6   3    9.60    1.50
   7   6   3   11.40    1.80
  -7   6  -3    9.10    1.60
   7   6   3    8.30    1.60
   8  -6   3  504.65   24.10
  -8  -6  -3  483.55   24.00
   8  -6   3  486.65   24.40
  -8  -6  -3  496.35   24.50
   8  -6   3  504.25   24.30
   8   6   3  498.15   24.30
   8   6   3  503.95   24.30
   8   6   3  515.65   24.10
  -8   6  -3  503.45   24.40
   9  -6   3    0.80    1.90
  -9  -6  -3    2.20    2.00
   9  -6   3    1.90    1.70
   9  -6   3   -0.80    1.60
  -9  -6  -3   -0.20    1.10
  -9   6  -3    1.60    1.70
   9   6   3   -0.70    1.50
  -9   6  -3    0.50    1.50
   9   6   3    0.60    1.60
 -10  -6  -3   42.70    3.80
 -10  -6  -3   38.10    2.70
  10  -6   3   38.90    3.80
  10  -6   3   39.60    3.70
  10   6   3   32.60    3.50
  10   6   3   38.60    3.70
 -10   6  -3   40.40    3.50
 -10   6  -3   36.50    3.80
  11  -6   3    5.40    2.10
 -11  -6  -3    4.30    1.30
 -11  -6  -3    1.10    2.60
  11  -6   3    2.60    2.10
  11   6   3    3.80    2.00
 -11   6  -3    6.00    2.10
  11   6   3    3.40    2.10
 -11   6  -3    3.90    2.20
  12  -6   3   19.50    2.80
  12  -6   3   20.40    2.70
 -12  -6  -3   15.30    3.40
 -12   6  -3   12.90    2.80
  12   6   3   15.90    2.70
 -12   6  -3   18.90    2.90
  12   6   3   19.40    2.90
  13  -6   3    2.20    2.70
  13  -6   3   -5.90    2.30
 -13  -6  -3   -4.70    3.50
 -13   6  -3   -6.60    2.60
  13   6   3    3.90    2.80
 -14  -6  -3   10.70    4.00
  14  -6   3    3.90    3.00
  14   6   3    1.50    3.20
 -14   6  -3    1.40    3.20
  14   6   3    4.00    3.10
  15  -6   3   14.50    3.50
 -15  -6  -3   28.80    5.20
  15   6   3   20.10    4.00
 -15   6  -3   19.90    4.40
 -15  -7   3    1.60    4.60
  15  -7  -3    5.40    4.30
  15  -7  -3    7.60    4.00
  15  -7  -3    0.20    3.50
  15   7  -3    4.80    3.60
 -14  -7   3   60.39    5.90
  14  -7  -3   49.99    5.70
  14  -7  -3   54.39    5.00
  14  -7  -3   51.09    5.20
  14   7  -3   61.19    5.60
  14   7  -3   60.49    6.10
 -13  -7   3    1.20    3.50
  13  -7  -3    5.10    3.00
  13  -7  -3   -0.80    2.80
 -13  -7   3   -0.40    2.40
  13   7  -3    0.20    2.80
  13   7  -3    2.70    2.70
 -12  -7   3   11.40    2.10
  12  -7  -3    4.60    2.60
  12  -7  -3    8.20    2.80
 -12  -7   3    2.90    3.70
  12   7  -3   12.60    2.70
  12   7  -3   13.00    2.60
 -11  -7   3   -0.50    2.40
 -11  -7   3    2.50    1.70
  11  -7  -3    1.90    2.50
  11  -7  -3    1.10    2.10
  11   7  -3    4.00    2.20
  11   7  -3    2.20    2.10
 -10  -7   3   -3.20    2.00
 -10  -7   3    0.30    1.50
  10  -7  -3    0.80    1.60
  10  -7  -3    4.40    2.20
  10   7  -3    0.10    1.90
  10   7  -3    3.00    1.90
   9  -7  -3   23.00    2.30
  -9  -7   3   21.90    2.70
   9  -7  -3   21.40    2.70
  -9  -7   3   23.70    2.50
  -9   7   3   21.70    2.30
   9   7  -3   27.90    2.60
   9   7  -3   24.30    2.50
   8  -7  -3   25.60    2.20
   8  -7  -3   20.40    2.60
  -8  -7   3   20.80    2.10
   8  -7  -3   19.70    2.50
  -8  -7   3   19.40    2.50
   8   7  -3   26.70    2.40
  -8   7   3   21.70    2.10
   8   7  -3   24.50    2.40
   7  -7  -3   10.80    1.80
  -7  -7   3    8.50    1.80
  -7  -7   3   10.10    1.60
   7  -7  -3    9.20    1.90
   7  -7  -3   10.60    1.50
  -7  -7   3   10.00    1.90
  -7   7   3    8.60    1.90
  -7   7   3    9.40    1.60
   7   7  -3    9.70    1.50
   7   7  -3   10.00    2.40
   7   7  -3    9.40    1.70
   6  -7  -3  120.69    6.10
   6  -7  -3  116.09    6.40
   6  -7  -3  102.59    6.10
  -6  -7   3  117.79    6.30
   6  -7  -3  113.29    5.90
  -6  -7   3  113.79    6.10
  -6  -7   3  113.59    6.10
   6   7  -3  110.79    6.10
   6   7  -3  120.09    6.20
  -6   7   3  114.89    6.00
  -6   7   3  112.29    6.40
   6   7  -3  106.89    6.40
   5  -7  -3    4.10    1.20
  -5  -7   3    3.90    1.20
  -5  -7   3    3.10    1.40
   5  -7  -3    1.60    1.20
   5  -7  -3    2.80    1.20
  -5  -7   3    1.10    1.30
   5  -7  -3    2.50    1.40
  -5   7   3    1.80    1.30
   5   7  -3    3.40    1.20
   5   7  -3    3.10    1.40
  -5   7   3    3.70    1.10
   5   7  -3    1.60    1.20
   5   7  -3   -1.90    1.50
  -4  -7   3   -0.30    1.10
   4  -7  -3    1.60    0.90
   4  -7  -3    0.10    1.00
  -4  -7   3    0.80    1.10
   4  -7  -3    1.00    0.90
   4  -7  -3    1.10    1.30
  -4  -7   3    1.60    1.10
  -4  -7   3    0.30    1.30
   4   7  -3    2.00    1.00
   4   7  -3    2.50    1.50
   4   7  -3   -0.40    1.10
  -4   7   3    1.10    1.30
   4   7  -3    1.30    1.10
  -4   7   3    0.50    1.00
  -3  -7   3   28.10    2.50
  -3  -7   3   25.60    2.30
   3  -7  -3   28.30    2.60
  -3  -7   3   26.50    2.30
   3  -7  -3   26.60    2.00
   3  -7  -3   28.40    1.90
  -3   7   3   23.70    2.00
  -3   7   3   29.40    2.50
   3   7  -3   30.70    2.50
   3   7  -3   26.90    2.20
   3   7  -3   30.70    2.20
   3   7  -3   26.00    2.40
  -2  -7   3  215.08   10.60
  -2  -7   3  198.18   10.60
   2  -7  -3  205.28   10.60
   2  -7  -3  219.08   10.30
   2  -7  -3  227.38   10.90
   2  -7  -3  212.18   10.30
  -2  -7   3  205.28   10.30
  -2  -7   3  212.68   10.40
  -2   7   3  210.58   10.30
   2   7  -3  205.38   10.60
  -2   7   3  209.48   10.60
   2   7  -3  206.88   10.70
  -2   7   3  210.18   10.30
   2   7  -3  207.88   10.40
   2   7  -3  214.68   10.30
   1  -7  -3    0.40    0.70
  -1  -7   3    0.30    1.00
  -1  -7   3    0.40    1.20
   1  -7  -3   -0.90    1.10
   1  -7  -3   -0.80    0.70
  -1  -7   3    0.90    0.70
   1  -7  -3    0.10    1.30
  -1  -7   3   -0.60    0.90
  -1   7   3    0.00    0.70
   1   7  -3    0.10    0.90
   1   7  -3    1.60    1.30
   1   7  -3   -0.60    0.80
  -1   7   3    0.10    1.20
  -1   7   3    1.20    0.80
   1   7  -3    0.40    1.00
   0  -7   3   81.29    4.60
   0  -7   3   78.29    4.00
   0  -7  -3   76.79    4.50
   0  -7  -3   78.49    4.20
   0  -7   3   78.29    4.50
   0  -7  -3   81.89    4.10
   0  -7  -3   77.29    4.60
   0  -7   3   80.29    4.20
   0   7  -3   78.69    4.00
   0   7  -3   80.29    4.30
   0   7  -3   72.39    4.70
   0   7   3   75.39    4.50
   0   7  -3   74.79    4.50
   0   7   3   81.09    4.10
   0   7   3   78.69    4.20
   1  -7   3   -0.10    0.50
   1  -7   3   -0.80    1.30
  -1  -7  -3    0.60    0.70
  -1  -7  -3    1.00    1.20
  -1  -7  -3   -0.60    1.30
   1  -7   3   -1.10    1.10
   1  -7   3   -2.20    0.80
  -1   7  -3   -0.10    0.40
   1   7   3    1.20    0.90
  -1   7  -3    0.10    1.10
  -1   7  -3   -0.30    0.90
   1   7   3    0.90    1.10
  -1   7  -3    0.00    1.40
   1   7   3   -0.10    0.70
   2  -7   3  217.68   10.60
  -2  -7  -3  223.78   10.50
   2  -7   3  217.18   11.00
  -2  -7  -3  212.48   10.70
  -2  -7  -3  209.08   10.80
   2  -7   3  208.98   10.80
   2  -7   3  219.38   10.30
  -2  -7  -3  210.18   10.80
   2   7   3  221.88   10.70
  -2   7  -3  214.68   10.80
  -2   7  -3  215.78   10.60
   2   7   3  208.28   10.80
   2   7   3  214.98   10.50
  -3  -7  -3    3.80    1.20
  -3  -7  -3    4.40    1.00
   3  -7   3    6.00    1.20
   3  -7   3    5.30    1.40
  -3  -7  -3    2.70    1.10
  -3  -7  -3    7.10    1.50
   3  -7   3    4.30    0.60
   3   7   3    5.20    1.30
   3   7   3    4.30    1.40
   3   7   3    4.70    1.00
  -3   7  -3    5.90    1.30
  -3   7  -3    5.40    1.10
   4  -7   3  113.59    5.90
  -4  -7  -3  109.39    6.00
  -4  -7  -3  103.69    6.00
   4  -7   3  107.69    6.10
   4  -7   3  112.19    5.50
   4  -7   3  111.59    5.50
  -4  -7  -3  110.49    5.80
   4   7   3  113.39    6.10
  -4   7  -3  106.69    6.10
   4   7   3  114.19    6.10
   4   7   3  111.69    5.80
   4   7   3  117.79    6.00
  -4   7  -3  113.89    5.90
  -5  -7  -3   25.20    2.60
  -5  -7  -3   21.00    2.00
   5  -7   3   27.30    1.90
   5  -7   3   29.70    2.80
   5  -7   3   26.80    1.70
   5  -7   3   24.50    2.30
  -5  -7  -3   27.90    2.40
   5   7   3   24.70    2.70
   5   7   3   26.40    2.40
  -5   7  -3   28.70    2.80
  -5   7  -3   28.40    2.50
   5   7   3   26.60    2.20
  -6  -7  -3  566.04   28.10
   6  -7   3  580.44   28.10
  -6  -7  -3  583.24   27.90
   6  -7   3  583.14   27.70
   6  -7   3  580.44   27.70
   6   7   3  579.14   27.90
   6   7   3  593.54   28.00
  -6   7  -3  569.14   28.00
   6   7   3  579.14   28.10
  -7  -7  -3    9.80    1.50
   7  -7   3   13.90    1.40
   7  -7   3   10.40    2.00
   7  -7   3   12.10    1.60
  -7  -7  -3   12.70    2.10
  -7   7  -3   12.00    1.80
   7   7   3   11.90    2.00
   7   7   3   12.90    2.00
   7   7   3   10.50    1.60
   8  -7   3    1.30    1.70
  -8  -7  -3    0.50    1.20
  -8  -7  -3    1.00    1.90
   8  -7   3    1.00    1.70
   8   7   3   -2.50    1.30
   8   7   3   -1.60    1.70
  -8   7  -3   -0.70    1.60
   9  -7   3   22.20    2.60
   9  -7   3   25.50    2.80
  -9  -7  -3   21.30    2.00
  -9  -7  -3   22.90    2.80
   9  -7   3   23.80    2.50
  -9   7  -3   22.00    2.60
   9   7   3   20.90    2.30
   9   7   3   20.00    2.50
  10  -7   3   29.70    3.90
  10  -7   3   32.60    3.00
  10  -7   3   26.10    3.00
 -10  -7  -3   30.70    2.70
 -10  -7  -3   25.10    3.30
  10   7   3   32.70    3.10
  10   7   3   23.10    2.70
 -10   7  -3   30.00    3.00
  11  -7   3    6.40    2.50
 -11  -7  -3    3.80    2.90
  11  -7   3    8.50    2.40
  11   7   3    5.50    2.20
 -11   7  -3    7.30    2.30
  11   7   3    5.20    2.40
  12  -7   3   -0.50    2.60
 -12  -7  -3    0.20    2.90
  12  -7   3    0.60    2.50
  12   7   3    1.80    2.50
  12   7   3    5.70    2.70
 -12   7  -3    0.50    2.50
  13  -7   3   -2.00    2.80
  13  -7   3   -6.90    2.60
 -13  -7  -3   -4.40    3.60
  13   7   3    3.10    2.80
  13   7   3   -0.10    3.00
  14  -7   3    0.70    3.20
  14  -7   3    1.50    4.00
 -14  -7  -3    3.20    4.20
  14   7   3    0.70    3.20
  14   7   3   -2.80    3.40
  14  -8  -3    2.90    3.30
  14  -8  -3    3.40    2.90
 -14  -8   3    3.30    4.30
  14  -8  -3    1.00    3.70
  14   8  -3   10.80    3.70
  14   8  -3    7.60    3.50
 -13  -8   3   -5.10    3.50
  13  -8  -3    1.50    2.90
  13  -8  -3   -1.10    3.40
  13  -8  -3   -1.80    2.60
  13   8  -3   -4.90    2.90
  13   8  -3    3.80    3.00
  12  -8  -3   -1.80    2.90
 -12  -8   3    0.30    2.00
 -12  -8   3    5.00    3.10
  12  -8  -3    1.80    2.30
  12  -8  -3    1.80    2.70
  12   8  -3   -0.90    2.90
  12   8  -3   -2.10    2.60
  11  -8  -3    5.30    2.40
 -11  -8   3    8.60    2.10
 -11  -8   3    5.80    2.70
  11  -8  -3    5.30    2.20
  11  -8  -3    8.10    2.90
  11   8  -3    2.60    2.50
  11   8  -3    7.40    2.50
  10  -8  -3    3.30    1.70
 -10  -8   3    8.60    2.60
  10  -8  -3    3.10    2.50
 -10  -8   3    5.90    1.80
  10   8  -3    4.90    2.10
  10   8  -3    6.70    2.30
   9  -8  -3    9.40    2.30
   9  -8  -3    5.30    1.60
  -9  -8   3    5.50    2.20
  -9  -8   3    7.00    1.80
   9   8  -3    9.50    2.10
   9   8  -3    5.00    1.90
  -9   8   3    6.70    1.80
   8  -8  -3    0.40    2.10
  -8  -8   3    4.60    1.60
  -8  -8   3    1.10    1.80
   8  -8  -3    2.60    1.40
   8  -8  -3    1.20    2.00
  -8   8   3    2.50    1.50
   8   8  -3    3.60    1.60
   8   8  -3    5.20    1.90
  -7  -8   3    1.90    1.70
   7  -8  -3    1.30    1.90
  -7  -8   3    3.10    1.40
   7  -8  -3    2.50    1.80
   7  -8  -3    1.60    1.30
   7   8  -3    5.80    1.80
   7   8  -3    0.70    1.40
  -7   8   3    4.20    1.80
  -7   8   3    1.60    1.40
   6  -8  -3   13.00    1.80
  -6  -8   3   10.50    1.70
   6  -8  -3   11.40    2.00
   6  -8  -3    8.40    1.80
  -6  -8   3   11.80    1.90
   6  -8  -3   11.20    1.50
   6   8  -3   11.80    1.70
   6   8  -3   11.20    1.80
  -6   8   3    8.80    1.90
  -6   8   3   12.60    1.60
   5  -8  -3   73.89    4.40
   5  -8  -3   75.39    4.40
   5  -8  -3   79.19    4.90
  -5  -8   3   74.59    4.60
  -5  -8   3   76.39    4.60
  -5   8   3   71.99    4.80
  -5   8   3   78.89    4.30
   5   8  -3   71.09    4.60
   5   8  -3   77.69    4.50
   4  -8  -3   39.60    2.80
  -4  -8   3   37.00    3.10
  -4  -8   3   41.40    3.00
   4  -8  -3   38.00    2.80
   4  -8  -3   43.50    3.40
   4  -8  -3   39.40    2.70
  -4   8   3   43.20    3.30
  -4   8   3   40.10    2.80
   4   8  -3   41.50    3.20
   4   8  -3   44.20    3.10
   4   8  -3   39.90    2.90
  -3  -8   3   21.80    2.00
   3  -8  -3   20.30    1.90
   3  -8  -3   21.40    1.90
  -3  -8   3   23.80    2.20
  -3  -8   3   23.20    2.20
   3  -8  -3   20.20    2.20
  -3   8   3   19.30    2.00
  -3   8   3   24.60    2.60
   3   8  -3   21.30    2.20
   3   8  -3   24.50    2.20
   3   8  -3   23.30    2.20
   2  -8  -3   -1.00    1.30
   2  -8  -3    0.10    0.90
   2  -8  -3    1.70    0.90
  -2  -8   3   -2.70    1.10
  -2  -8   3    0.90    1.20
  -2  -8   3    0.10    0.90
   2   8  -3    1.20    1.00
   2   8  -3    0.30    1.10
  -2   8   3    0.00    1.30
  -2   8   3    1.30    1.00
   2   8  -3   -2.00    1.30
  -2   8   3    0.50    0.80
   1  -8  -3  121.89    6.00
  -1  -8   3  128.79    6.20
   1  -8  -3  126.79    6.10
  -1  -8   3  118.79    6.00
   1  -8  -3  118.89    6.50
  -1  -8   3  116.39    6.50
   1   8  -3  112.39    6.40
   1   8  -3  115.39    6.20
  -1   8   3  117.89    6.10
  -1   8   3  118.49    6.00
   1   8  -3  119.19    6.00
  -1   8   3  114.29    6.50
   0  -8   3   13.70    1.70
   0  -8   3   17.40    1.60
   0  -8  -3   15.40    1.90
   0  -8  -3   16.30    1.60
   0  -8   3   12.70    1.40
   0   8  -3   14.60    1.50
   0   8   3   15.70    1.30
   0   8  -3   18.40    1.90
   0   8   3   16.60    1.60
   0   8  -3   11.80    1.30
   0   8   3   13.10    1.90
  -1  -8  -3  176.58    9.20
  -1  -8  -3  182.38    8.90
  -1  -8  -3  175.98    8.80
   1  -8   3  183.98    8.90
   1  -8   3  169.98    9.10
   1  -8   3  179.88    8.60
  -1   8  -3  169.68    8.90
   1   8   3  181.78    8.80
  -1   8  -3  176.88    9.20
   1   8   3  178.38    8.90
   1   8   3  173.68    9.20
  -2  -8  -3   15.60    1.60
   2  -8   3   12.90    1.80
   2  -8   3   12.90    1.50
  -2  -8  -3   17.40    1.50
   2  -8   3   14.20    1.20
  -2  -8  -3   15.10    1.80
  -2   8  -3   13.40    1.50
   2   8   3   12.80    1.80
  -2   8  -3   12.90    1.80
   2   8   3   16.60    1.70
   2   8   3   14.90    1.40
   3  -8   3    8.30    1.40
   3  -8   3    9.80    1.70
  -3  -8  -3    8.90    1.50
  -3  -8  -3    7.20    1.60
  -3  -8  -3   11.10    1.30
   3   8   3    9.80    1.70
   3   8   3   10.20    1.80
  -3   8  -3    8.50    1.70
  -3   8  -3   10.70    1.40
   3   8   3    7.70    1.40
   4  -8   3   30.10    3.10
  -4  -8  -3   33.70    2.60
  -4  -8  -3   32.90    2.80
   4  -8   3   35.70    3.20
  -4  -8  -3   34.00    2.80
   4   8   3   28.60    3.00
  -4   8  -3   27.30    2.90
  -4   8  -3   26.40    2.60
   4   8   3   29.60    2.40
   5  -8   3    0.40    0.80
  -5  -8  -3    3.50    1.40
  -5  -8  -3    0.30    1.50
   5  -8   3    3.50    1.70
  -5  -8  -3    0.20    1.40
   5   8   3   -2.50    1.60
   5   8   3    1.20    1.10
  -5   8  -3   -0.10    1.30
  -5   8  -3   -0.10    1.20
  -6  -8  -3    1.70    1.60
   6  -8   3    0.40    1.10
   6  -8   3    3.80    1.80
   6  -8   3    1.00    0.90
  -6  -8  -3    0.60    1.30
   6   8   3   -1.30    1.70
   6   8   3    0.40    1.20
  -6   8  -3   -0.30    1.40
   7  -8   3   79.19    5.30
   7  -8   3   83.29    4.50
   7  -8   3   79.29    4.30
  -7  -8  -3   84.19    5.30
  -7  -8  -3   80.69    4.80
   7   8   3   74.69    4.70
   7   8   3   81.29    5.20
  -7   8  -3   81.79    5.00
   8  -8   3    5.70    1.70
   8  -8   3    4.10    2.00
  -8  -8  -3    4.60    2.10
  -8  -8  -3    4.10    1.50
   8   8   3    2.60    1.60
   8   8   3    2.70    2.00
  -8   8  -3    5.40    1.80
  -9  -8  -3   16.90    2.00
  -9  -8  -3   16.60    2.80
   9  -8   3   18.00    2.70
   9  -8   3   21.90    2.50
   9  -8   3   16.70    1.90
   9  -8   3   16.30    2.60
   9   8   3   15.50    2.30
   9   8   3   20.10    2.70
  -9   8  -3   17.60    2.50
  10  -8   3   14.50    2.70
 -10  -8  -3   11.50    1.90
  10  -8   3   10.00    1.80
  10  -8   3   14.30    2.70
 -10  -8  -3    6.50    2.70
  10   8   3    8.70    2.10
 -10   8  -3   14.20    2.50
  10   8   3   12.40    2.60
  11  -8   3   19.30    2.40
  11  -8   3   19.80    3.10
  11  -8   3   22.00    3.20
 -11  -8  -3   21.00    4.40
 -11  -8  -3   22.20    2.30
 -11   8  -3   24.90    3.20
  11   8   3   21.10    2.80
  11   8   3   28.20    3.30
 -12  -8  -3   -0.20    3.40
  12  -8   3   -2.20    2.80
  12  -8   3   -2.80    2.70
  12   8   3    0.20    2.90
 -12   8  -3    4.20    3.50
  12   8   3    1.40    2.40
 -13  -8  -3   29.80    4.80
  13  -8   3   29.90    3.90
  13  -8   3   27.70    4.00
  13   8   3   26.80    3.80
  13   8   3   37.00    4.30
 -14  -8  -3   10.00    4.90
  14  -8   3   -0.20    6.20
  14  -8   3   15.50    3.80
  14   8   3    4.40    3.40
  14   8   3    8.20    4.00
  13  -9  -3    2.10    2.70
  13  -9  -3    1.50    3.80
  13  -9  -3    7.50    3.50
 -13  -9   3   -2.90    3.70
  13   9  -3   -0.20    3.00
  13   9  -3    2.40    3.30
 -12  -9   3   -4.90    2.10
  12  -9  -3    1.00    3.30
 -12  -9   3   -0.50    3.30
  12  -9  -3    2.10    3.10
  12  -9  -3    0.80    2.30
  12   9  -3    1.60    3.10
  12   9  -3    1.40    2.70
  11  -9  -3   11.40    3.10
  11  -9  -3   10.60    3.30
  11  -9  -3    5.30    2.10
 -11  -9   3    6.30    2.30
  11   9  -3   14.80    3.00
  11   9  -3    5.40    2.60
  10  -9  -3    0.90    1.80
 -10  -9   3    2.40    2.60
  10  -9  -3    2.40    2.70
 -10  -9   3    2.80    1.90
  10   9  -3    1.10    2.10
  10   9  -3    7.20    2.60
 -10   9   3    1.20    2.10
   9  -9  -3    5.10    2.60
   9  -9  -3   11.20    1.90
  -9  -9   3   12.80    2.70
  -9  -9   3    9.10    2.00
  -9   9   3    9.60    2.20
   9   9  -3   12.40    2.30
   9   9  -3   15.30    2.60
  -8  -9   3    4.00    2.00
   8  -9  -3    0.80    2.20
   8  -9  -3   -1.00    2.30
   8  -9  -3    5.40    1.50
  -8  -9   3    1.30    1.70
   8   9  -3    2.10    2.10
  -8   9   3    1.00    1.60
   8   9  -3    6.90    1.90
  -7  -9   3   20.80    2.50
  -7  -9   3   21.00    2.30
   7  -9  -3   21.60    2.70
   7  -9  -3   21.20    2.00
   7  -9  -3   19.30    2.50
  -7   9   3   20.50    2.20
   7   9  -3   24.90    2.60
  -7   9   3   17.10    2.60
   7   9  -3   18.40    2.30
  -6  -9   3    1.00    1.60
   6  -9  -3    1.00    1.30
   6  -9  -3   -0.40    1.80
   6  -9  -3    1.50    1.70
  -6  -9   3    1.30    1.60
   6   9  -3    3.80    1.80
  -6   9   3   -1.60    1.80
   6   9  -3    0.30    1.40
  -6   9   3   -0.60    1.30
   5  -9  -3   15.40    2.30
   5  -9  -3   15.30    1.90
  -5  -9   3   15.90    2.00
   5  -9  -3   15.20    1.90
  -5  -9   3   20.40    2.20
   5  -9  -3   20.90    1.80
  -5   9   3   19.20    1.80
   5   9  -3   19.70    2.30
  -5   9   3   15.40    2.30
   5   9  -3   21.80    2.10
   4  -9  -3    7.50    1.50
  -4  -9   3    6.30    1.60
   4  -9  -3   10.60    2.00
   4  -9  -3   10.40    1.40
  -4  -9   3    7.80    1.50
   4   9  -3    9.20    1.70
   4   9  -3    8.30    1.40
  -4   9   3    5.90    1.30
  -4   9   3    6.40    2.00
   4   9  -3    8.50    1.90
   3  -9  -3   39.80    3.40
  -3  -9   3   38.90    3.20
   3  -9  -3   34.70    2.70
  -3  -9   3   36.50    2.90
   3   9  -3   37.40    3.00
  -3   9   3   36.60    3.40
   3   9  -3   40.10    3.00
   3   9  -3   40.80    3.40
  -3   9   3   41.00    2.70
  -2  -9   3    1.80    1.50
  -2  -9   3    0.70    1.40
   2  -9  -3    0.90    1.10
   2  -9  -3    2.40    1.60
  -2   9   3    2.80    1.60
   2   9  -3    0.40    1.10
   2   9  -3    4.10    1.50
  -2   9   3   -0.30    1.10
   2   9  -3    2.40    1.20
   1  -9  -3    5.40    1.20
  -1  -9   3    4.60    1.40
  -1  -9   3    4.90    1.50
  -1  -9   3    6.20    1.10
   1  -9  -3    5.10    1.10
   1  -9  -3    6.40    1.70
   1   9  -3    4.50    1.30
   1   9  -3    3.80    1.70
   1   9  -3    4.60    1.10
  -1   9   3    4.50    1.10
  -1   9   3    4.90    1.60
  -1   9   3    3.40    1.20
   0  -9  -3    4.50    1.10
   0  -9  -3    2.30    1.20
   0  -9  -3    4.30    1.70
   0  -9   3    5.00    1.50
   0  -9   3    5.40    1.60
   0  -9   3    5.10    1.00
   0   9  -3    4.90    1.70
   0   9   3    5.80    1.70
   0   9  -3    3.90    1.20
   0   9  -3    3.90    1.00
   0   9   3    3.80    1.10
   0   9   3    4.50    1.30
  -1  -9  -3    4.60    1.20
   1  -9   3    3.00    0.80
  -1  -9  -3    3.70    1.60
   1  -9   3    4.10    1.40
  -1  -9  -3    0.90    1.10
   1  -9   3    3.20    1.50
  -1   9  -3    2.90    1.60
   1   9   3    2.20    1.50
   1   9   3    1.40    1.30
  -1   9  -3    2.70    0.80
  -1   9  -3    2.50    1.20
  -2  -9  -3   11.20    1.40
  -2  -9  -3   11.20    1.80
   2  -9   3    5.30    1.70
   2  -9   3    6.70    1.60
   2  -9   3   10.50    0.90
  -2  -9  -3    7.20    1.50
  -2   9  -3   10.30    2.00
   2   9   3    7.70    1.90
  -2   9  -3    8.50    1.40
   2   9   3    8.60    1.60
   2   9   3    9.50    1.30
   3  -9   3  597.44   29.40
  -3  -9  -3  600.94   29.40
  -3  -9  -3  606.44   29.10
  -3  -9  -3  614.34   29.30
   3   9   3  608.84   29.10
[truncated: 2,084,459 more chars]
